# Supplementary material for: Proteogenomic analysis of air-pollution-associated lung cancer reveals prevention and therapeutic opportunities
Source: eLife. 2024 Oct 21;13:RP95453. doi: 10.7554/eLife.95453 (PMC11493407; doi:10.7554/eLife.95453)
Supplement: Supplementary file 1. — (a) Clinical data for TSLC and TNLC cohorts. (b) Clinical data for CNLC cohort. (c) Clinical data for XWLC cohort. [file elife-95453-supp1.xlsx]

## Sheet: Description
Table S1. Clinical information for TSLC, TNLC, CNLC and XWLC cohorts.
Table S1a.Clinical data for TSLC and TNLC cohorts.
Table S1b.Clinical data for CNLC cohort.
Table S1c.Clinical data for XWLC cohort.

## Sheet: S1a
Sample_id	Cohort	Gender	Pathologic_stage	Number_pack_years_smoked	Tobacco_smoking_history
TCGA-78-7159-01	TLSF	FEMALE	Stage IA	21	4
TCGA-44-7661-01	TLSF	FEMALE	Stage IB	22	3
TCGA-97-7941-01	TLSF	FEMALE	Stage IA	22.5	3
TCGA-MP-A4T9-01	TLSF	FEMALE	Stage IIIA	24	4
TCGA-50-5941-01	TLSF	FEMALE	Stage IIIA	25	2
TCGA-73-4658-01	TLSF	FEMALE	Stage IB	25	3
TCGA-91-6835-01	TLSF	FEMALE	Stage IA	25	3
TCGA-97-7546-01	TLSF	FEMALE	Stage IA	25	3
TCGA-J2-A4AG-01	TLSF	FEMALE	Stage IA	25	3
TCGA-NJ-A55A-01	TLSF	FEMALE	Stage IB	25	3
TCGA-38-7271-01	TLSF	FEMALE	Stage IA	25	4
TCGA-44-2657-01	TLSF	FEMALE	Stage IB	25	4
TCGA-44-6775-01	TLSF	FEMALE	Stage IB	25	4
TCGA-62-A46R-01	TLSF	FEMALE	Stage IB	25	4
TCGA-64-5781-01	TLSF	FEMALE	Stage IB	25	4
TCGA-69-7973-01	TLSF	FEMALE	Stage IB	25	4
TCGA-69-A59K-01	TLSF	FEMALE	Stage IIB	25	4
TCGA-78-7145-01	TLSF	FEMALE	Stage IV	25	4
TCGA-80-5608-01	TLSF	FEMALE	Stage IA	26	2
TCGA-78-7161-01	TLSF	FEMALE	Stage IIB	27.8	4
TCGA-69-7979-01	TLSF	FEMALE	Stage IB	28	2
TCGA-05-4425-01	TLSF	FEMALE	Stage IV	28	3
TCGA-44-A47G-01	TLSF	FEMALE	Stage IA	28	4
TCGA-73-7498-01	TLSF	FEMALE	Stage IA	28	4
TCGA-MP-A4TK-01	TLSF	FEMALE	Stage IIB	28	4
TCGA-44-7670-01	TLSF	FEMALE	Stage IIA	30	2
TCGA-49-6767-01	TLSF	FEMALE	Stage IIB	30	2
TCGA-44-2655-01	TLSF	FEMALE	Stage IA	30	3
TCGA-44-4112-01	TLSF	FEMALE	Stage IB	30	3
TCGA-55-7726-01	TLSF	FEMALE	Stage IA	30	3
TCGA-91-6849-01	TLSF	FEMALE	Stage IIIA	30	3
TCGA-97-7547-01	TLSF	FEMALE	Stage IB	30	3
TCGA-97-7554-01	TLSF	FEMALE	Stage IIIA	30	3
TCGA-NJ-A4YF-01	TLSF	FEMALE	Stage IA	30	3
TCGA-4B-A93V-01	TLSF	FEMALE	Stage IA	30	4
TCGA-50-5051-01	TLSF	FEMALE	Stage IIIA	30	4
TCGA-50-5942-01	TLSF	FEMALE	Stage IA	30	4
TCGA-50-8457-01	TLSF	FEMALE	Stage IA	30	4
TCGA-55-7728-01	TLSF	FEMALE	Stage IB	30	4
TCGA-55-8205-01	TLSF	FEMALE	Stage IIA	30	4
TCGA-55-8621-01	TLSF	FEMALE	Stage IA	30	4
TCGA-69-7974-01	TLSF	FEMALE	Stage IIIA	30	4
TCGA-73-4670-01	TLSF	FEMALE	Stage IV	30	4
TCGA-99-8028-01	TLSF	FEMALE	Stage IA	30	4
TCGA-NJ-A55O-01	TLSF	FEMALE	Stage IIA	30	4
TCGA-L4-A4E5-01	TLSF	FEMALE	Stage I	33	4
TCGA-75-6211-01	TLSF	FEMALE	Stage IB	34	2
TCGA-95-7039-01	TLSF	FEMALE	Stage IIB	34	2
TCGA-97-A4M0-01	TLSF	FEMALE	Stage IB	34	4
TCGA-78-7220-01	TLSF	FEMALE	Stage IIIA	35	2
TCGA-55-A492-01	TLSF	FEMALE	Stage IA	35	3
TCGA-53-7626-01	TLSF	FEMALE	Stage IIA	35	4
TCGA-53-7813-01	TLSF	FEMALE	Stage IIIB	35	4
TCGA-55-8097-01	TLSF	FEMALE	Stage IA	35	4
TCGA-86-8056-01	TLSF	FEMALE	Stage IIIA	36	3
TCGA-55-A48X-01	TLSF	FEMALE	Stage IIA	36	4
TCGA-97-A4M3-01	TLSF	FEMALE	Stage IA	37.5	3
TCGA-38-4626-01	TLSF	FEMALE	Stage IA	40	2
TCGA-55-7913-01	TLSF	FEMALE	Stage IA	40	2
TCGA-64-1679-01	TLSF	FEMALE	Stage IIIA	40	2
TCGA-75-6214-01	TLSF	FEMALE	Stage IIIA	40	2
TCGA-86-8074-01	TLSF	FEMALE	Stage IIA	40	2
TCGA-97-7938-01	TLSF	FEMALE	Stage IA	40	3
TCGA-38-4631-01	TLSF	FEMALE	Stage IB	40	4
TCGA-44-A479-01	TLSF	FEMALE	Stage IB	40	4
TCGA-49-4487-01	TLSF	FEMALE	Stage IA	40	4
TCGA-50-5931-01	TLSF	FEMALE	Stage IB	40	4
TCGA-55-A48Z-01	TLSF	FEMALE	Stage IIIB	40	4
TCGA-75-5126-01	TLSF	FEMALE	Stage IIIA	40	4
TCGA-95-7043-01	TLSF	FEMALE	Stage IA	40	4
TCGA-MP-A4TF-01	TLSF	FEMALE	Stage IIA	40	4
TCGA-NJ-A4YQ-01	TLSF	FEMALE	Stage IA	40	4
TCGA-93-7348-01	TLSF	FEMALE	Stage IA	42	4
TCGA-95-A4VN-01	TLSF	FEMALE	Stage IIA	42	4
TCGA-86-7714-01	TLSF	FEMALE	Stage IIIA	43	2
TCGA-78-8648-01	TLSF	FEMALE	Stage IIB	45	2
TCGA-78-8662-01	TLSF	FEMALE	Stage IB	45	2
TCGA-55-A491-01	TLSF	FEMALE	Stage IA	45	3
TCGA-95-A4VK-01	TLSF	FEMALE	Stage IIIA	45	3
TCGA-O1-A52J-01	TLSF	FEMALE	Stage IA	45	3
TCGA-44-6776-01	TLSF	FEMALE	Stage IA	45	4
TCGA-99-AA5R-01	TLSF	FEMALE	Stage IA	46	2
TCGA-05-4250-01	TLSF	FEMALE	Stage IIIA	47	4
TCGA-62-A46O-01	TLSF	FEMALE	Stage IB	48	2
TCGA-38-4625-01	TLSF	FEMALE	Stage IB	50	2
TCGA-44-3396-01	TLSF	FEMALE	Stage IIIA	50	2
TCGA-44-7667-01	TLSF	FEMALE	Stage IIB	50	2
TCGA-53-7624-01	TLSF	FEMALE	Stage IV	50	2
TCGA-55-8203-01	TLSF	FEMALE	Stage IA	50	2
TCGA-55-8208-01	TLSF	FEMALE	Stage IA	50	2
TCGA-64-1677-01	TLSF	FEMALE	Stage IIIA	50	2
TCGA-78-7147-01	TLSF	FEMALE	Stage IIB	50	2
TCGA-91-6836-01	TLSF	FEMALE	Stage IB	50	2
TCGA-MP-A4T4-01	TLSF	FEMALE	Stage IIB	50	2
TCGA-91-6840-01	TLSF	FEMALE	Stage IA	50	3
TCGA-MP-A4T6-01	TLSF	FEMALE	Stage IIIA	50	3
TCGA-44-A4SU-01	TLSF	FEMALE	Stage IA	50	4
TCGA-49-6743-01	TLSF	FEMALE	Stage IIIA	50	4
TCGA-49-6761-01	TLSF	FEMALE	Stage IIIA	50	4
TCGA-50-6590-01	TLSF	FEMALE	Stage IB	50	4
TCGA-55-6985-01	TLSF	FEMALE	Stage IB	50	4
TCGA-55-7724-01	TLSF	FEMALE	Stage IB	50	4
TCGA-MP-A4T7-01	TLSF	FEMALE	Stage IV	50	4
TCGA-86-6851-01	TLSF	FEMALE	Stage IIA	52	2
TCGA-99-7458-01	TLSF	FEMALE	Stage IIIA	52	4
TCGA-55-A493-01	TLSF	FEMALE	Stage IB	53	2
TCGA-44-8117-01	TLSF	FEMALE	Stage IB	54	4
TCGA-73-4668-01	TLSF	FEMALE	Stage IIB	55	4
TCGA-MP-A4TA-01	TLSF	FEMALE	Stage IA	55	4
TCGA-49-4510-01	TLSF	FEMALE	Stage IIB	55.5	2
TCGA-05-4417-01	TLSF	FEMALE	Stage IB	56	4
TCGA-44-2659-01	TLSF	FEMALE	Stage IIB	57	4
TCGA-55-8511-01	TLSF	FEMALE	Stage IB	58	2
TCGA-44-3398-01	TLSF	FEMALE	Stage IA	60	4
TCGA-49-AARQ-01	TLSF	FEMALE	Stage I	60	4
TCGA-55-6543-01	TLSF	FEMALE	Stage IA	60	4
TCGA-55-6971-01	TLSF	FEMALE	Stage IB	60	4
TCGA-55-7995-01	TLSF	FEMALE	Stage IA	60	4
TCGA-44-6777-01	TLSF	FEMALE	Stage IB	64	4
TCGA-49-4514-01	TLSF	FEMALE	Stage IA	65	3
TCGA-05-4405-01	TLSF	FEMALE	Stage IB	65	4
TCGA-83-5908-01	TLSF	FEMALE	Stage IA	69	4
TCGA-05-4398-01	TLSF	FEMALE	Stage IIIB	72	2
TCGA-49-4505-01	TLSF	FEMALE	Stage IIB	74	4
TCGA-44-6145-01	TLSF	FEMALE	Stage IA	75	4
TCGA-49-4507-01	TLSF	FEMALE	Stage IIIA	78	4
TCGA-05-4430-01	TLSF	FEMALE	Stage IB	80	4
TCGA-44-A47A-01	TLSF	FEMALE	Stage IB	80	4
TCGA-69-7980-01	TLSF	FEMALE	Stage I	80	4
TCGA-91-8499-01	TLSF	FEMALE	Stage IA	90	2
TCGA-L9-A443-01	TLSF	FEMALE	Stage IA	90	4
TCGA-S2-AA1A-01	TLSF	FEMALE	Stage IA	95	3
TCGA-55-7911-01	TLSF	FEMALE	Stage IA	96	3
TCGA-49-4506-01	TLSF	FEMALE	Stage IIB	100	2
TCGA-55-8096-01	TLSF	FEMALE	Stage IB	104	2
TCGA-J2-A4AD-01	TLSF	FEMALE	Stage IA	120	2
TCGA-49-AARO-01	TLSF	FEMALE	Stage IA	NA	2
TCGA-55-8506-01	TLSF	FEMALE	Stage IIB	NA	2
TCGA-55-8508-01	TLSF	FEMALE	Stage IIA	NA	2
TCGA-55-8510-01	TLSF	FEMALE	Stage IB	NA	2
TCGA-71-6725-01	TLSF	FEMALE	Stage IB	NA	2
TCGA-MP-A4TJ-01	TLSF	FEMALE	Stage IA	NA	2
TCGA-44-6147-01	TLSF	FEMALE	Stage IA	NA	3
TCGA-49-4488-01	TLSF	FEMALE	Stage IA	NA	3
TCGA-50-6595-01	TLSF	FEMALE	Stage IIIA	NA	3
TCGA-55-6979-01	TLSF	FEMALE	Stage IIB	NA	3
TCGA-55-6981-01	TLSF	FEMALE	Stage IIIA	NA	3
TCGA-55-7573-01	TLSF	FEMALE	Stage IA	NA	3
TCGA-55-8204-01	TLSF	FEMALE	Stage IB	NA	3
TCGA-62-A46V-01	TLSF	FEMALE	Stage IB	NA	3
TCGA-64-1681-01	TLSF	FEMALE	Stage IA	NA	3
TCGA-67-3770-01	TLSF	FEMALE	Stage IA	NA	3
TCGA-67-3773-01	TLSF	FEMALE	Stage IB	NA	3
TCGA-67-3774-01	TLSF	FEMALE	Stage IB	NA	3
TCGA-67-6217-01	TLSF	FEMALE	Stage IIA	NA	3
TCGA-91-6847-01	TLSF	FEMALE	Stage IB	NA	3
TCGA-97-8175-01	TLSF	FEMALE	Stage IB	NA	3
TCGA-38-4627-01	TLSF	FEMALE	Stage IIA	NA	4
TCGA-50-6592-01	TLSF	FEMALE	Stage IB	NA	4
TCGA-50-6593-01	TLSF	FEMALE	Stage IIIA	NA	4
TCGA-50-6594-01	TLSF	FEMALE	Stage IIIA	NA	4
TCGA-55-1595-01	TLSF	FEMALE	Stage IA	NA	4
TCGA-55-6970-01	TLSF	FEMALE	Stage IIIA	NA	4
TCGA-55-8616-01	TLSF	FEMALE	Stage IB	NA	4
TCGA-67-3771-01	TLSF	FEMALE	Stage IA	NA	4
TCGA-86-A456-01	TLSF	FEMALE	Stage IA	NA	4
TCGA-L9-A5IP-01	TLSF	FEMALE	Stage IV	NA	4
TCGA-49-AARN-01	TLSF	FEMALE	Stage IA	NA	5
TCGA-05-4402-01	TLNF	FEMALE	Stage IV	NA	1
TCGA-05-5715-01	TLNF	FEMALE	Stage IB	NA	1
TCGA-38-4628-01	TLNF	FEMALE	Stage IIB	NA	1
TCGA-38-4630-01	TLNF	FEMALE	Stage IB	NA	1
TCGA-38-6178-01	TLNF	FEMALE	Stage IIIA	NA	1
TCGA-44-2661-01	TLNF	FEMALE	Stage IA	NA	1
TCGA-44-2665-01	TLNF	FEMALE	Stage IIB	NA	1
TCGA-44-3919-01	TLNF	FEMALE	Stage IA	NA	1
TCGA-49-4501-01	TLNF	FEMALE	Stage IB	NA	1
TCGA-49-4512-01	TLNF	FEMALE	Stage IIIA	NA	1
TCGA-49-AAQV-01	TLNF	FEMALE	Stage II	NA	1
TCGA-50-6591-01	TLNF	FEMALE	Stage IV	NA	1
TCGA-50-6597-01	TLNF	FEMALE	Stage IB	NA	1
TCGA-50-6673-01	TLNF	FEMALE	Stage I	NA	1
TCGA-55-6982-01	TLNF	FEMALE	Stage IIB	NA	1
TCGA-55-6986-01	TLNF	FEMALE	Stage IB	NA	1
TCGA-55-7816-01	TLNF	FEMALE	Stage IV	NA	1
TCGA-55-8087-01	TLNF	FEMALE	Stage IB	NA	1
TCGA-55-8513-01	TLNF	FEMALE	Stage IIB	NA	1
TCGA-55-8619-01	TLNF	FEMALE	Stage IIB	NA	1
TCGA-55-A57B-01	TLNF	FEMALE	Stage IA	NA	1
TCGA-62-8394-01	TLNF	FEMALE	Stage IIIB	NA	1
TCGA-62-8395-01	TLNF	FEMALE	Stage IIB	NA	1
TCGA-62-8397-01	TLNF	FEMALE	Stage IIB	NA	1
TCGA-62-8402-01	TLNF	FEMALE	Stage IIIA	NA	1
TCGA-62-A46U-01	TLNF	FEMALE	Stage IIB	NA	1
TCGA-62-A46Y-01	TLNF	FEMALE	Stage IIIA	NA	1
TCGA-67-3772-01	TLNF	FEMALE	Stage IB	NA	1
TCGA-67-6215-01	TLNF	FEMALE	Stage IB	NA	1
TCGA-67-6216-01	TLNF	FEMALE	Stage IA	NA	1
TCGA-71-8520-01	TLNF	FEMALE	Stage IB	NA	1
TCGA-73-7499-01	TLNF	FEMALE	Stage IB	NA	1
TCGA-75-5147-01	TLNF	FEMALE	Stage IB	NA	1
TCGA-75-6203-01	TLNF	FEMALE	Stage IIIA	NA	1
TCGA-75-6205-01	TLNF	FEMALE	Stage IB	NA	1
TCGA-75-6212-01	TLNF	FEMALE	Stage IIB	NA	1
TCGA-78-7143-01	TLNF	FEMALE	Stage IB	NA	1
TCGA-78-7540-01	TLNF	FEMALE	Stage IB	NA	1
TCGA-86-7953-01	TLNF	FEMALE	Stage IA	NA	1
TCGA-86-8075-01	TLNF	FEMALE	Stage IB	NA	1
TCGA-86-8278-01	TLNF	FEMALE	Stage IIB	NA	1
TCGA-86-8280-01	TLNF	FEMALE	Stage IIA	NA	1
TCGA-86-8668-01	TLNF	FEMALE	Stage IA	NA	1
TCGA-86-8671-01	TLNF	FEMALE	Stage IIB	NA	1
TCGA-86-A4P7-01	TLNF	FEMALE	Stage IB	NA	1
TCGA-86-A4P8-01	TLNF	FEMALE	Stage IIIA	NA	1
TCGA-91-8496-01	TLNF	FEMALE	Stage IB	NA	1
TCGA-91-8497-01	TLNF	FEMALE	Stage IA	NA	1
TCGA-97-8177-01	TLNF	FEMALE	Stage IB	NA	1
TCGA-97-8547-01	TLNF	FEMALE	Stage IIIA	NA	1
TCGA-97-8552-01	TLNF	FEMALE	Stage I	NA	1
TCGA-97-A4M6-01	TLNF	FEMALE	Stage IA	NA	1
TCGA-99-8033-01	TLNF	FEMALE	Stage IV	NA	1
TCGA-J2-8192-01	TLNF	FEMALE	Stage IIA	NA	1
TCGA-J2-A4AE-01	TLNF	FEMALE	Stage IA	NA	1
TCGA-55-7914-01	TLNF	FEMALE	Stage IIA	5	2
TCGA-95-7948-01	TLNF	FEMALE	Stage IB	0.15	3
TCGA-55-7574-01	TLNF	FEMALE	Stage IB	2	4
TCGA-78-7539-01	TLNF	FEMALE	Stage IIA	2.2	3
TCGA-97-A4M1-01	TLNF	FEMALE	Stage IA	3	3
TCGA-NJ-A4YI-01	TLNF	FEMALE	Stage IIIA	3	3
TCGA-44-5645-01	TLNF	FEMALE	Stage IA	5	3
TCGA-49-4490-01	TLNF	FEMALE	Stage IIIA	5	3
TCGA-55-7283-01	TLNF	FEMALE	Stage IIIA	5	3
TCGA-75-7031-01	TLNF	FEMALE	Stage IB	5	3
TCGA-78-7146-01	TLNF	FEMALE	Stage IIIA	6	4
TCGA-55-A494-01	TLNF	FEMALE	Stage IB	7	3
TCGA-69-8253-01	TLNF	FEMALE	Stage IIA	7.8	4
TCGA-86-7954-01	TLNF	FEMALE	Stage IB	8	3
TCGA-05-4427-01	TLNF	FEMALE	Stage IIB	8	4
TCGA-L9-A444-01	TLNF	FEMALE	Stage IA	10	2
TCGA-73-4662-01	TLNF	FEMALE	Stage IA	10	3
TCGA-73-4666-01	TLNF	FEMALE	Stage IV	10	4
TCGA-78-8655-01	TLNF	FEMALE	Stage IA	10	4
TCGA-93-7347-01	TLNF	FEMALE	Stage IA	11	3
TCGA-91-6830-01	TLNF	FEMALE	Stage IIA	12	4
TCGA-L9-A8F4-01	TLNF	FEMALE	Stage IB	14	2
TCGA-78-7158-01	TLNF	FEMALE	Stage IIIB	14	4
TCGA-05-4434-01	TLNF	FEMALE	Stage IV	15	2
TCGA-80-5607-01	TLNF	FEMALE	Stage IIB	15	3
TCGA-MP-A5C7-01	TLNF	FEMALE	Stage IB	15	3
TCGA-05-4390-01	TLNF	FEMALE	Stage IB	15	4
TCGA-44-6779-01	TLNF	FEMALE	Stage IIB	15	4
TCGA-49-AARE-01	TLNF	FEMALE	Stage IA	15	4
TCGA-55-7910-01	TLNF	FEMALE	Stage IIA	15	4
TCGA-55-7725-01	TLNF	FEMALE	Stage IA	16	3
TCGA-44-5644-01	TLNF	FEMALE	Stage IB	17.5	2
TCGA-44-6774-01	TLNF	FEMALE	Stage IIIA	20	2
TCGA-44-7672-01	TLNF	FEMALE	Stage IA	20	2
TCGA-97-7553-01	TLNF	FEMALE	Stage IA	20	2
TCGA-44-3918-01	TLNF	FEMALE	Stage IA	20	3
TCGA-64-1678-01	TLNF	FEMALE	Stage IA	20	3
TCGA-97-8172-01	TLNF	FEMALE	Stage IB	20	3
TCGA-J2-8194-01	TLNF	FEMALE	Stage IIB	20	3
TCGA-MP-A4TH-01	TLNF	FEMALE	Stage IA	20	3
TCGA-49-6744-01	TLNF	FEMALE	Stage IIA	20	4
TCGA-55-7281-01	TLNF	FEMALE	Stage IA	20	4
TCGA-55-8299-01	TLNF	FEMALE	Stage IA	20	4
TCGA-55-8514-01	TLNF	FEMALE	Stage IB	20	4
TCGA-78-7153-01	TLNF	FEMALE	Stage IB	20	4
TCGA-95-A4VP-01	TLNF	FEMALE	Stage IIIA	20	4
TCGA-99-8025-01	TLNF	FEMALE	Stage IIIA	20	4

## Sheet: S1b
Sample ID	Smoke Status (0:Non-smoker; 1:Smoker)	Gender (1:Male;2:Female)	Age Group (1: <=60; 2:>60)	Histological Type	Histological Subtypes	Stage
LUAD_01	0	2	1	Adenocarcinoma	papillary predominant	IB
LUAD_05	0	2	1	Adenocarcinoma	acinar predominant	IB
LUAD_06	0	2	1	Adenocarcinoma	acinar predominant	IB
LUAD_07	0	2	2	Adenocarcinoma	acinar predominant	IB
LUAD_08	0	2	2	Adenocarcinoma	acinar predominant	IIB
LUAD_09	0	2	2	Adenocarcinoma	acinar predominant	IB
LUAD_10	0	2	1	Adenocarcinoma	acinar predominant	IIIA
LUAD_13	0	2	1	Adenocarcinoma	acinar predominant	IB
LUAD_15	0	2	1	Adenocarcinoma	solid predominant	IIIA
LUAD_16	0	2	2	Adenocarcinoma	papillary predominant	IIB
LUAD_18	0	2	1	Adenocarcinoma	acinar predominant	IB
LUAD_19	0	2	1	Adenocarcinoma	solid predominant	IB
LUAD_22	0	1	1	Adenocarcinoma	acinar predominant	IIIA
LUAD_23	0	2	1	Adenocarcinoma	acinar predominant	IA1
LUAD_25	0	2	2	Adenocarcinoma	acinar predominant	IA1
LUAD_27	0	1	1	Adenocarcinoma	solid predominant	IIIA
LUAD_28	0	2	2	Adenocarcinoma	acinar predominant	IB
LUAD_29	0	2	2	Adenocarcinoma	lepidic predominant	IA2
LUAD_31	0	1	1	Adenocarcinoma	solid predominant	IIIA
LUAD_32	0	2	1	Adenocarcinoma	lepidic predominant	IA1
LUAD_33	0	2	1	Adenocarcinoma	acinar predominant	IB
LUAD_34	0	2	2	Adenocarcinoma	acinar predominant	IIIA
LUAD_35	0	2	1	Adenocarcinoma	acinar (50%) + solid (50%)	IIB
LUAD_36	0	2	1	Adenocarcinoma	papillary predominant	IA2
LUAD_38	0	2	2	Adenocarcinoma	acinar predominant	IA3
LUAD_39	0	2	1	Adenocarcinoma	acinar predominant	IVA
LUAD_40	0	2	1	Adenocarcinoma	papillary predominant	IA3
LUAD_41	0	2	2	Adenocarcinoma	acinar predominant	IIIA
LUAD_42	0	2	1	Adenocarcinoma	solid predominant	IIIB
LUAD_43	0	2	1	Adenocarcinoma	papillary predominant	IIIA
LUAD_44	0	2	1	Adenocarcinoma	papillary predominant	IIIA
LUAD_45	0	2	1	Adenocarcinoma	solid predominant	IIA
LUAD_46	0	2	1	Adenocarcinoma	papillary predominant	IIB
LUAD_47	0	2	1	Adenocarcinoma	solid predominant	IIB
LUAD_48	0	2	2	Adenocarcinoma	acinar predominant	IIIB
LUAD_49	0	2	1	Adenocarcinoma	solid (90%) + acinar (10%)	IIIB
LUAD_50	0	2	1	Adenocarcinoma	acinar predominant	IA3
LUAD_52	0	2	2	Adenocarcinoma	papillary predominant	IB
LUAD_53	0	1	2	Adenocarcinoma	acinar predominant	IIIA
LUAD_54	0	2	2	Adenocarcinoma	acinar (70%) + solid (30%)	IA3
LUAD_55	0	1	1	Adenocarcinoma	acinar predominant	IB
LUAD_57	0	1	2	Adenocarcinoma	papillary predominant	IB
LUAD_60	0	2	2	Adenocarcinoma	solid predominant	IIIB
LUAD_61	0	2	1	Adenocarcinoma	papillary predominant	IIB
LUAD_62	0	2	1	Adenocarcinoma	papillary predominant	IIIB
LUAD_63	0	2	2	Adenocarcinoma	solid predominant	IIIB
LUAD_65	0	1	2	Adenocarcinoma	acinar (80%) + papillary (20%)	IB
LUAD_66	0	2	2	Adenocarcinoma	acinar predominant	IIIA
LUAD_67	0	2	1	Adenocarcinoma	papillary (80%) + acinar (20%)	IIIA
LUAD_68	0	2	1	Adenocarcinoma	solid predominant	IIB
LUAD_69	0	1	2	Adenocarcinoma	papillary predominant	IIA
LUAD_70	0	2	2	Adenocarcinoma	acinar predominant	IB
LUAD_71	0	2	2	Adenocarcinoma	acinar predominant	IB
LUAD_72	0	2	2	Adenocarcinoma	solid predominant	IIB
LUAD_75	0	2	2	Adenocarcinoma	acinar predominant	IIIA
LUAD_76	0	1	1	Adenocarcinoma	micropapillary predominant	IIIA
LUAD_78	0	2	2	Adenocarcinoma	lepidic predominant	IIIA
LUAD_79	0	2	2	Adenocarcinoma	NA	IA2
LUAD_82	0	2	2	Adenocarcinoma	acinar predominant	IB
LUAD_83	0	2	2	Adenocarcinoma	solid predominant	IIIB
LUAD_84	0	2	2	Adenocarcinoma	solid (70%) + lepidic (30%)	IA2
LUAD_85	0	1	2	Adenocarcinoma	acinar predominant	IA2
LUAD_86	0	2	2	Adenocarcinoma	acinar (80%) + micropapillary (20%)	IA3
LUAD_87	0	2	2	Adenocarcinoma	acinar predominant	IIA
LUAD_88	0	2	2	Adenocarcinoma	papillary + micropapillary	IIIA
LUAD_89	0	2	1	Adenocarcinoma	solid predominant	IIIA
LUAD_90	0	1	2	Adenocarcinoma	lepidic predominant	IB
LUAD_91	0	1	1	Adenocarcinoma	acinar predominant	IA3
LUAD_92	0	2	2	Adenocarcinoma	lepidic predominant	IB
LUAD_93	0	2	2	Adenocarcinoma	acinar predominant	IB
LUAD_95	0	1	1	Adenocarcinoma	acinar predominant	IVA
LUAD_96	0	2	1	Adenocarcinoma	other	IIIA
LUAD_97	0	2	1	Adenocarcinoma	acinar + lepidic	IB
LUAD_98	0	2	2	Adenocarcinoma	acinar predominant	IB
LUAD_100	0	1	2	Adenocarcinoma	micropapillary predominant	IB
LUAD_101	0	2	1	Adenocarcinoma	acinar predominant	IB
LUAD_102	0	1	1	Adenocarcinoma	acinar predominant	IIB

## Sheet: S1c
Patient_ID	TNM	ConsensusClusterPlus_Multiomics	Status	Status_0_1	Period	EGFR_mutation	TP53_mutation
XWLC_0124	T1cN0M0 Ia	C4	live	0	369	p.L718L	p.G206D
XWLC_0125	T1bN0M0 Ia2	C4	live	0	336	p.G312V	NA
XWLC_0126	T1bN0M0 Ia	C4	live	0	328	NA	NA
XWLC_0127	T1cN0M0 Ia	C4	NA	NA	226	p.L747_E749del	NA
XWLC_0128	T1bN0M0 Ia	C4	NA	NA	NA	p.S306Y	NA
XWLC_0055	T2aN0M0 Ib	C1	live	0	1148	p.N158N	NA
XWLC_0061	T1bN0M0 Ia	C2	live	0	1102	p.E746_A750del	p.S202F
XWLC_0063	T1bN0M0 Ia	C1	live	0	1080	NA	NA
XWLC_0073	T1bN0M0 Ia	C1	live	0	1031	p.G719C	NA
XWLC_0077	T1cN0M0 Ia3	C1	live	0	1030	p.K745_E746insIPVAIK	NA
XWLC_0078	T1bN0M0 Ia	C1	live	0	1031	NA	NA
XWLC_0082	T1bN0M0 Ia	C3	live	0	1020	p.G719S	p.R174X
XWLC_0083	T2aN0M0 Ib	C1	NA	NA	346	NA	NA
XWLC_0084	T1bN0M0 Ia	C1	live	0	1010	p.G719C	NA
XWLC_0087	T1cN0M0 Ia3	C3	live	0	1003	p.L858R	NA
XWLC_0103	T1cN0M0 Ia3	C3	live	0	897	p.G719A	NA
XWLC_0105	T1bN0M0 Ia	C3	NA	NA	731	p.E746_A750del	NA
XWLC_0106	T1bN0M0 Ia	C2	live	0	719	p.G719S	NA
XWLC_0101	T2aN0M0 Ib	C1	live	0	909	NA	NA
XWLC_0093	T2aN0M0 Ib	C2	live	0	968	p.V834L	NA
XWLC_0036	T1cN0M0 Ia	C2	live	0	1433	NA	NA
XWLC_0037	T1bN0M0 Ia	C2	live	0	1421	NA	p.Q292X
XWLC_0040	T2aN0M0 Ib	C2	dead	1	734	p.G719C	p.V34Wfs*49
XWLC_0041	T2aN0M0 Ib	C2	live	0	1380	NA	NA
XWLC_0113	T1bN0M0	C4	live	0	656	p.G779F	p.T245P
XWLC_0121	T2aN0M0 Ib	C4	NA	NA	441	NA	NA
XWLC_0122	T1N0M0 I	C4	live	0	518	NA	NA
XWLC_0097	T1cN0M0 Ia3	C3	NA	NA	862	p.L858R	NA
XWLC_0100	T2aN0M0 Ib	C3	NA	NA	946	p.G719C	NA
XWLC_0104	T2aN0M0 Ib	C3	live	0	610	NA	NA
XWLC_0088	T1bN0M0 Ia	C3	metastasis_recurrence	0	1007	NA	NA
XWLC_0109	T1cN0M0 Ia3	C3	live	0	705	p.L858R	p.P112T
XWLC_0004	T2aN0M0 Ib	C1	NA	NA	1546	NA	NA
XWLC_0008	T2aN0M0 Ib	C1	live	0	1820	NA	NA
XWLC_0012	T1bN0M0 Ia	C1	live	0	1766	p.G719C	NA
XWLC_0016	T1bN0M0 IA	C2	NA	NA	1567	p.S752_I759del	p.G205Afs*2
XWLC_0023	T2aN0M0 Ib	C2	dead	1	1541	p.G719C	p.E165X
XWLC_0024	T1bN0M0 Ia	C2	NA	NA	1561	NA	p.E255X
XWLC_0026	T1N0M0 Ia	C2	live	0	1540	p.L833F	p.R210S
XWLC_0027	T2aN0M0 Ib	C1	metastasis_recurrence	0	1497	p.G719C	p.R209L
XWLC_0047	T2aN0M0 Ib	C2	NA	NA	1393	p.L858R	p.G206C
XWLC_0129	T1bN0M0	C2	live	0	223	p.G719S	NA
XWLC_0107	T1cN0M0 Ia3	C3	live	0	680	NA	p.S202Y
XWLC_0131	T2aN0M0 Ib	NA	live	0	575	NA	NA
XWLC_0134	T1cN0M0 Ia	NA	live	0	679	NA	NA
XWLC_0135	T2aN0M0 Ib	NA	NA	NA	653	NA	NA
XWLC_0136	T1bN0M0 Ia	NA	live	0	653	NA	NA
XWLC_0138	T1bN0M0 Ia	NA	NA	NA	1018	NA	NA
XWLC_0139	T1bN0M0 Ia	NA	live	0	637	NA	NA
XWLC_0140	T1cN0M0 Ia	NA	live	0	638	NA	NA
XWLC_0141	T1cN0M0 Ia	NA	live	0	639	NA	NA
XWLC_0142	T1aN0M0 Ia	NA	live	0	610	NA	NA
XWLC_0145	T1aN0M0 Ia	NA	live	0	602	NA	NA
XWLC_0146	T1cN0M0 Ia	NA	live	0	617	NA	NA
XWLC_0147	T1bN0M0 Ia	NA	live	0	603	NA	NA
XWLC_0148	T1aN0M0 Ia	NA	live	0	602	NA	NA
XWLC_0149	T1aN0M0 Ia	NA	live	0	581	NA	NA
XWLC_0150	T1bN0M0 Ia	NA	live	0	575	NA	NA
XWLC_0151	T1bN0M0 Ia	NA	NA	NA	569	NA	NA
XWLC_0152	T1bN0M0 Ia	NA	live	0	554	NA	NA
XWLC_0154	T1bN0M0 Ia	NA	live	0	547	NA	NA
XWLC_0155	T1cN0M0 Ia	NA	live	0	540	NA	NA
XWLC_0156	T1bN0M0 Ia	NA	live	0	540	NA	NA
XWLC_0157	T1bN0M0 Ia	NA	live	0	547	NA	NA
XWLC_0159	T1aN0M0 Ia	NA	live	0	516	NA	NA
XWLC_0160	T1aN0M0 Ia	NA	live	0	524	NA	NA
XWLC_0161	T1aN0M0 Ia	NA	live	0	379	NA	NA
XWLC_0162	T1cN0M0 Ia	NA	live	0	313	NA	NA
XWLC_0002	T1aN0M0 Ia	NA	dead	1	1062	NA	NA
XWLC_0005	T1N0M0 Ia	NA	metastasis_recurrence	0	1863	NA	p.E255X
XWLC_0007	T1aN0M0 Ia	NA	live	0	1835	NA	p.G115V
XWLC_0013	T2N0M0 Ib	NA	NA	NA	1751	NA	NA
XWLC_0018	T2aN0M0 Ib	NA	live	0	1623	NA	p.E255X
XWLC_0020	T1aN0M0 Ia	NA	metastasis_recurrence	0	1602	p.G719C	NA
XWLC_0022	T2aN0M0 Ib	NA	live	0	1583	NA	NA
XWLC_0028	T1N0M0 Ia	NA	NA	NA	1532	NA	NA
XWLC_0032	T2aN0M0 Ib	NA	NA	NA	1476	NA	NA
XWLC_0072	T2aN0M0 Ib	NA	live	0	1074	p.L747_T751del	p.L91V
XWLC_0092	T2aN0M0 Ib	NA	live	0	1058	NA	NA
XWLC_0001	T1N0M0 Ia	NA	live	0	1065	NA	NA
XWLC_0031	T1bN0M0 Ia	NA	live	0	1043	p.G719C	p.V118F
XWLC_0034	T1N0M0 Ia	NA	NA	NA	797	NA	NA
XWLC_0039	T1bN0M0 Ia	NA	live	0	1416	p.L747_T751del	p.R210G
XWLC_0042	T2aN0M0 Ib	NA	live	0	1379	NA	NA
XWLC_0049	T2aN0M0 Ib	NA	live	0	1289	NA	NA
XWLC_0050	T1N0M0 Ia	NA	live	0	1234	p.L858R	p.K100E
XWLC_0051	T2N0M0 Ib	NA	NA	NA	1195	NA	NA
XWLC_0052	T1bN0M0 Ia	NA	live	0	1170	p.A647T	NA
XWLC_0053	T2aN0M0 Ib	NA	live	0	1151	p.L858R	p.C199F
XWLC_0058	T2bN0M0 Ib	NA	live	0	1114	NA	NA
XWLC_0060	T1bN0M0 Ia	NA	live	0	429	NA	p.C203F
XWLC_0064	T1bN0M0 Ia	NA	live	0	1092	NA	NA
XWLC_0065	T1bN0M0 Ia	NA	live	0	1090	p.A237V	p.E132X
XWLC_0066	T1bN0M0 Ia	NA	live	0	904	p.Q787Q	p.P33R
XWLC_0067	T1N0M0 Ia	NA	live	0	1066	p.L858R	NA
XWLC_0068	T2aN0M0 Ib	NA	live	0	1072	NA	NA
XWLC_0069	T2aN0M0 Ib	NA	live	0	1062	NA	NA
XWLC_0070	T2aN0M0 Ib	NA	dead	1	1045	p.L858R	p.V34Wfs*49
XWLC_0074	T1cN0M0 Ia3	NA	live	0	1030	p.L858R	NA
XWLC_0075	T2N0M0 Ib	NA	live	0	1042	p.L858R	NA
XWLC_0079	T1bN0M0 Ia	NA	live	0	1024	p.L858R	p.E255X
XWLC_0089	T2N0M0 Ib	NA	live	0	996	NA	NA
XWLC_0090	T1cN0M0 Ia3	NA	live	0	1002	p.L861Q	p.G295V
XWLC_0091	T1cN0M0 Ia3	NA	NA	NA	1003	p.L747_P753delinsS	NA
XWLC_0094	T1bN0M0 Ia	NA	live	0	967	NA	NA
XWLC_0095	T1cN0M0 Ia3	NA	live	0	966	p.L858R	p.L218P
XWLC_0096	T2N0M0 Ib	NA	live	0	435	NA	NA
XWLC_0098	T1bN0M0 Ia	NA	NA	NA	865	NA	p.R174L
XWLC_0099	T1bN0M0 Ia	NA	live	0	950	p.G719D	NA
XWLC_0165	T2N0M0 Ib	NA	live	0	1182	NA	NA
XWLC_0168	T1N0M0 Ia	NA	dead	1	406	NA	NA
XWLC_0169	T1cNxM0 Ia	NA	live	0	1017	NA	NA
XWLC_0085	T1bN1M0 IIb	C2	live	0	1008	p.G719C	NA
XWLC_0110	T3N0M0 IIb	C1	live	0	1039	NA	NA
XWLC_0057	T3N0M0 IIb	C1	live	0	1119	p.G719D	NA
XWLC_0115	T2N0M0 IIa	C2	live	0	625	p.S229C	NA
XWLC_0116	T2aN0M0 II	C4	live	0	583	NA	NA
XWLC_0117	T3N0M0 IIB	C3	live	0	554	p.L858R	NA
XWLC_0003	T2N1M0 IIb	C1	live	0	1820	p.G719A	p.R119L
XWLC_0010	T2N1M0 IIb	C2	live	0	1808	p.G719C	NA
XWLC_0011	T1bN1M0 IIb	C2	NA	NA	1764	p.L718L	p.G115V
XWLC_0133	T2bN0M0 IIa	NA	live	0	675	NA	NA
XWLC_0108	T2bN0M0 IIa	NA	live	0	701	p.G719S	p.S15Ifs*28
XWLC_0014	T2bN0M0 IIa	NA	live	0	1737	NA	p.H154R
XWLC_0029	T2aN1M0 IIb	NA	live	0	1514	p.E746_A750del	p.P262Qfs*43
XWLC_0030	T1N1M0 IIb	NA	live	0	1512	p.E746_A750del	NA
XWLC_0033	T2bN0M0 IIa	NA	NA	NA	1471	NA	NA
XWLC_0019	T1cN1M0 IIb	NA	NA	NA	879	p.Q701L	p.R210S
XWLC_0035	T2bN0M0 IIa	NA	live	0	1371	NA	NA
XWLC_0054	T3N0M0 IIb	NA	NA	NA	1154	p.G465V	p.K282T
XWLC_0062	T1N1M0 IIb	NA	live	0	1093	NA	NA
XWLC_0076	T3N0M0 IIb	NA	NA	NA	935	NA	NA
XWLC_0080	T2N1M0 IIb	NA	NA	NA	1029	p.G719C	NA
XWLC_0086	T3N0M0 IIb	NA	live	0	1004	p.E746_A750del	NA
XWLC_0164	T3N0M0 IIb	NA	live	0	1154	p.L858R	NA
XWLC_0166	T2aN0M0 IIa	NA	live	0	1170	NA	NA
XWLC_0167	T3N0M0 IIa	NA	dead	1	661	NA	NA
XWLC_0118	T4N0M0 IIIA	C3	live	0	561	NA	p.E141K
XWLC_0059	T2bN2M0 IIIa	C1	NA	NA	1015	p.G719S	p.E259X
XWLC_0102	T2aN2M0 IIIa	C3	live	0	904	p.L858R	p.V118A
XWLC_0043	T3N2M0 IIIb	C2	live	0	1372	p.G719A	NA
XWLC_0046	T1aN2M0 IIIa	C2	live	0	1363	p.G719A	NA
XWLC_0111	T1cN2M0	C4	dead	1	588	p.V689L	NA
XWLC_0119	T3N1M0 IIIa	C2	live	0	532	p.E746_A750del	p.R119L
XWLC_0123	T4N0M0 IIIA	C3	live	0	373	NA	NA
XWLC_0006	T4N0M0 IIIa	C1	live	0	1863	NA	NA
XWLC_0015	T4N0M0 IIIA	C2	NA	NA	1023	p.L858R	p.C203F
XWLC_0021	T4N1M0 IIIA	C2	NA	NA	1610	p.G719C	p.R170Kfs*5
XWLC_0130	T2aN2M0 IIIa	C4	dead	1	705	NA	NA
XWLC_0025	T4N2M0 IIIb	NA	live	0	1554	p.L858R	p.V164Ffs*3
XWLC_0045	T2aN3M0 IIIb	NA	live	0	1101	p.L858R	p.D9Gfs*3
XWLC_0056	T2N2M0 IIIa	NA	dead	1	457	NA	p.R157X
XWLC_0071	T4N0M0 IIIa	NA	live	0	1051	NA	p.G206C
XWLC_0081	T4N2M0 IIIb	NA	live	0	1010	NA	p.G115V
XWLC_0163	T1N2M0 IIIa	NA	live	0	1254	p.E709K	NA
XWLC_0038	T2N1M1 IV	C1	live	0	1406	NA	NA
XWLC_0044	T3N2M1 IV	C2	live	0	1372	p.K1179X	p.R209W
XWLC_0120	T3N0M1 IVa	C3	NA	NA	519	NA	p.G66C
XWLC_0017	T4NxM1 IV	C2	NA	NA	1666	p.L833F	p.Y195C
XWLC_0144	T1bN0M0 Ia	NA	live	0	602	NA	NA
XWLC_0009	T4N2M1 IV	NA	NA	NA	1814	p.G719A	p.G205D
XWLC_0048	T4N0M1 IV	NA	live	0	1338	p.L858R	p.L218P
XWLC_0112	T1bN0M0 Ia	C4	live	0	681	NA	NA
XWLC_0114	T2aNxM0	C4	live	0	645	NA	NA
XWLC_0132	T1bN0M0 Ia	NA	live	0	328	NA	NA
XWLC_0137	T1bNxM0	NA	live	0	652	NA	NA
XWLC_0143	T1bN0M0 Ia	NA	NA	NA	NA	NA	NA
XWLC_0153	T1bN0Mx	NA	dead	1	554	NA	NA
XWLC_0158	T1bNxM0	NA	live	0	527	NA	NA
