# Supplementary material for: Proteogenomic analysis of air-pollution-associated lung cancer reveals prevention and therapeutic opportunities
Source: eLife. 2024 Oct 21;13:RP95453. doi: 10.7554/eLife.95453 (PMC11493407; doi:10.7554/eLife.95453)
Supplement: Supplementary file 4. [file elife-95453-supp4.xlsx]

## Sheet: Description
Table S4. Normalized mRNA expression (CPM values derived from EdgeR) in XWLC.

## Sheet: S4
	XWLC_0002_N	XWLC_0003_N	XWLC_0004_N	XWLC_0005_N	XWLC_0006_N	XWLC_0007_N	XWLC_0008_N	XWLC_0009_N	XWLC_0010_N	XWLC_0011_N	XWLC_0012_N	XWLC_0013_N	XWLC_0014_N	XWLC_0015_N	XWLC_0016_N	XWLC_0017_N	XWLC_0018_N	XWLC_0020_N	XWLC_0021_N	XWLC_0022_N	XWLC_0023_N	XWLC_0024_N	XWLC_0025_N	XWLC_0026_N	XWLC_0027_N	XWLC_0028_N	XWLC_0029_N	XWLC_0030_N	XWLC_0032_N	XWLC_0033_N	XWLC_0047_N	XWLC_0072_N	XWLC_0092_N	XWLC_0001_T	XWLC_0002_T	XWLC_0003_T	XWLC_0004_T	XWLC_0005_T	XWLC_0006_T	XWLC_0007_T	XWLC_0008_T	XWLC_0009_T	XWLC_0010_T	XWLC_0011_T	XWLC_0012_T	XWLC_0013_T	XWLC_0014_T	XWLC_0015_T	XWLC_0016_T
TSPAN6	1249.33	989.528	1036.46	943.697	1058.96	1115.51	1156.28	1160.13	1164.26	817.669	1049.46	1081.34	1487.86	1032.65	967.004	1261.56	996.032	934.531	1322.14	1096.08	1538.29	1289.82	1699.92	905.368	5140.07	5063.53	1159.98	1140.39	1072.11	640.957	1323.98	1449.51	1903.12	1471.66	1368.48	5348.33	5856.14	2093.97	2788.35	982.973	981.567	1943.85	3377.4	4083.37	1940.79	1727.82	1187.44	3046.5	3234
TNMD	0	0	0	1.85749	0.000524472	6.67383	0.0397704	0	2.12591	0	4.37096	0	11.055	3.17806	0.0164986	8.92338	2.21212	1.70091	4.08773	3.40411	2.24476	4.2615	11.9936	1.76379	4.17109	0	1.06836	9.16045	1.78654	2.39451	0	6.86164	5.62821	2.42064	4.96774	0	25.6885	0	10.2989	0	0	0	0.0136767	26.734	2.26297	0.0291441	208.551	2.36577	0
DPM1	1725.99	1494.56	2136.69	1955.85	1782.29	2056.49	2015.7	1359.97	1881.6	1974.01	1682.17	1698.29	1750.27	1874.8	1745.45	1780.44	1759.73	1657	1910.1	1870.29	2126.95	1757.49	1926.77	1762.39	3019.57	1753.85	2411.34	1454.2	1846.1	2437.16	2019.41	2085.44	1591.2	1475.13	1789.83	2159.1	2299.97	2858.31	1760.36	1663.41	1657.04	1739.18	1950.97	1843.7	1511.46	1583.28	2026.36	2192.12	1598.05
SCYL3	822.963	895.149	844.439	905.296	790.46	803.697	630.302	822.863	931.817	734.893	744.594	834.572	645.747	765.531	674.678	810.01	878.762	798.071	744.408	850.83	725.294	793.328	766.512	899.132	738.198	1994.41	626.229	822.067	752.205	505.211	834.688	632.517	823.168	578.395	680.878	1494.78	1212.55	735.737	754.005	1015.09	805.927	1942.31	1079.15	1144.11	852.002	1120.58	649.38	823.373	975.462
C1orf112	185.254	160.303	148.043	207.112	199.368	180.112	170.767	191.695	177.497	136.727	106.408	246.783	202.334	161.843	240.412	153.484	234.469	173.855	245.404	149.86	235.449	192.195	198.873	185.554	123.222	330.296	169.171	157.34	181.247	207.721	171.755	173.912	188.762	135.886	180.007	331.207	200.785	545.417	154.521	268.917	216.741	310.495	564.949	284.59	187.036	258.863	493.464	339.905	449.883
FGR	4070.13	5808.21	5658.93	6262.09	5099.42	4679.19	8919.88	6816.26	5711.36	6369.48	3283.21	6090.74	4090.04	6858.93	8652	6307.78	8124.68	10417.8	3704.65	4980.64	5152.47	5665.36	5058.78	4830.9	4341.45	3374.46	11868.6	5775.31	6662.12	11611	5034.13	4666.6	2555.28	5441.25	5917.52	1256.66	1904.51	1515.27	4292.2	3582.39	7187.99	1487.12	1141.37	1018.44	3198.79	2428.83	1878.38	1320.63	2669.6
CFH	6179.71	2745.07	8231.8	5555.47	4878.01	4127.64	8032.93	5317.9	4782.72	3135.87	3255.79	7683.14	8629.15	5981.72	5131.48	2699.37	3146.92	7867.87	8489.07	4175.79	4682.65	5645.07	5526.48	3204.74	6759.61	7623.62	3150.01	4364.48	6448.24	4708.01	6304.3	4348.6	8350.2	5866.43	5228.8	13664.1	15030.1	5448.16	5849.66	3491.22	5108.19	4549.22	18679.3	7903.07	3829.53	4809.14	8887.43	10729.8	4081.97
FUCA2	2901.78	3321.39	3631.73	3768.31	3452.37	3598.58	4249.1	3544.66	3618.46	3014.02	3067.16	3724.01	3986.67	3170.65	2821.53	3688.62	5102.7	2934.97	4636.17	3183.58	3825.19	3286.47	3973.47	3630.58	3168.91	3681.82	3702.66	3572.26	2946.32	5236.66	3834.57	3416.69	2855.68	5694.24	3356.05	3325.52	3081.66	4317.42	2400.03	3014.06	3738.07	3852.54	4266.84	2480.46	3978.87	2894.77	4196.6	3527.65	3287.57
GCLC	1344.29	1337.8	1360.42	1274.52	1171.16	1417.16	1870.15	1586.96	1222.37	1104.2	915.685	1345.61	1797.48	1234.41	1369.46	1178.37	1051.92	1449.23	1361	1198.29	1864.82	1411.54	1210.23	974.393	5661.08	3557.83	1262.95	1891.05	1168.18	1287.68	1245.99	1420.01	1508.4	1698.73	1607.22	2462.47	4597.42	7030.21	3794.68	1251.95	1588.52	1168.01	917.451	1568.61	1512.57	1064.53	1566.26	3873.15	2024.83
NFYA	1425.29	1686.98	1522.86	1277.33	1548.86	1488.07	1807.13	1453.12	1390.34	1751.68	995.732	1495.23	1865.18	1568.58	2441.26	1547.73	1271.05	1323.16	1513.35	1693.15	1481.66	1357.09	1383.12	1419.95	1671.63	2531.2	1461.53	1437.94	1384.79	2221.16	1245.06	1407.08	1649.19	1289	1657.49	1461.15	1180.76	2085.42	1101.14	1444.19	1481.33	1703.05	1554.98	1650.47	1191.71	1742.9	2438.5	2447.03	1397.6
STPG1	689.829	659.092	750.207	779.712	764.412	711.404	647.483	555.182	519.81	744.199	792.834	682.033	551.41	858.864	618.546	693.161	903.955	647.655	489.802	770.766	659.767	812.542	758.517	812.172	2158.11	621.086	1050.68	784.084	828.345	691.651	749.265	929.863	714.32	813.617	516.729	723.86	2320.78	356.909	1359.64	466.186	580.264	662.295	500.711	535.87	805.497	629.864	358.374	586.815	638.295
NIPAL3	3613.04	4683.29	3729.54	4473.06	4168.7	4705.03	3880.13	3462.37	4515.41	3454.04	5020.13	3958.15	2610.54	4221.74	3093.73	4549.13	4196.57	3927.82	3395.84	4226.08	3250.99	3645.22	3369.86	4128.11	2832.7	3786.43	3651.18	4758.82	4233.27	2753.55	3130.78	3272.55	3032.79	4517.69	2725.37	7563.14	2996.63	1767.5	3501.14	4402.73	3989.58	4655.97	4414.04	4202.35	4887.23	5017.23	2514.82	3780.24	2694.53
LAS1L	2097.46	1723.49	1556.06	1682.19	1793.31	1770.59	1753.29	1779.56	1703.06	1678.18	2480.44	1595.3	1608.78	1633.16	1517.74	1916.1	1792.59	1743.08	1498.02	1771.5	1664.92	1604.8	1905.79	1676.33	1868.97	1727.71	1920.67	1606.15	1756.38	1565.03	2184.69	1625.22	1730.51	1746.71	1809.94	2194.62	1752.18	1675.18	1895.29	1690.4	1786.01	1537.89	1971.71	1595.26	1831.22	1647.99	1789	2073.85	1895.51
ENPP4	2480.98	3574.34	5833.96	5668.89	4928.1	3541.19	3636.07	3433.43	3275.12	4049.41	1653.7	4398.27	2996.96	4727.33	3687.9	3821.31	6303.59	4850.24	2898.89	4917.66	4188.39	4625.39	4556.1	4043.84	4821.73	4139.5	6077.21	4360.88	5321.74	4500.25	3601.51	3623.81	2277.97	3213.59	2639.93	3188.25	3344.91	3008.67	4057.36	3432.27	3866.27	3477.54	2907.8	4747.76	2869.09	3951.68	2280.72	3202.66	1940.75
SEMA3F	5024.39	6250.05	4121.7	4234.08	4159.68	5866.64	4286.94	3919.02	5345.8	3126.58	6524.62	5671.03	6564.68	6433.16	5109.23	4837.29	3060.35	4608.55	3139.19	3429.71	4821.46	3888.67	3770.6	5222.68	2227.12	1651.62	3717.38	2932.85	2974.41	3367.27	3324.82	3233.8	5108.62	2845.97	5803.61	922.565	3119.37	1788.44	4303.53	4935.67	4495.84	784.37	1016.97	1866.53	2776.13	1315.83	3462.68	2622.76	2395.25
CFTR	1267.95	879.075	539.278	1447.91	1528.82	1483.56	620.021	923.208	1406.19	2572.21	434.3	744.206	736.221	1111.6	1800.51	1445.74	3030.64	642.403	8295.7	1142.93	670.904	760.251	749.523	1457.61	1379.28	2060.42	634.646	1297.76	1761.84	1642.88	862.518	1251.8	379.157	2667.81	1376.12	598.079	1325.91	374.988	866.28	2014.28	1253.29	5659.45	2624.75	2662.34	793.373	409.878	1080.22	807.311	473.84
ANKIB1	2648.57	2911.68	2886.9	2832.09	2692.97	2615.93	2910.67	2769.72	2972.95	2775.89	2276.53	3267.37	3394.9	2740.05	2831.05	2785.52	2259.38	2454.22	3153.49	2753.5	2657.87	2749.4	2804.22	2783.44	2276.19	2817.96	2457.59	2610.91	2475.06	2495.05	2245.95	2224.31	3079.12	2137.76	2292.34	3173.85	2167.81	3194.28	2565.86	2743.43	2972.4	2409.21	3907.12	2541.38	2094.58	2945.44	2729.42	4037.45	3840.92
CYP51A1	284.844	519.268	495.348	605.41	628.16	551.55	753.971	343.583	508.174	579.554	243.487	518.813	355.915	527.905	545.453	526.803	518.278	495.528	579.776	550.188	372.112	515.717	605.615	651.73	506.401	580.274	560.021	528.148	512.951	844.955	390.865	322.009	300.691	496.286	261.286	632.698	416.735	351.222	326.526	474.741	465.936	287.27	420.869	299.823	317.56	456.181	285.278	385.807	255.86
KRIT1	2079.76	2329.17	2207.57	2133.91	2214.09	2070.01	2095.92	2198.23	2387.65	2149.82	1814.86	2424.05	2068.23	2238.45	2171.22	2124.05	1732.34	2407.3	2028.71	2395.8	1624.96	2219.81	2340.51	2102.15	1929.54	2551.56	1992.13	2326.95	2245.78	1679.53	1998.05	2139.13	2068.77	1406.07	1754.64	2571.92	1935.18	1539.07	2276.41	2230.01	2142.26	2343.88	2382.22	2108.31	2050.3	2420.19	1640.23	2660.62	2197.57
RAD52	415.208	497.921	439.727	298.938	428.792	396.22	288.815	444.899	550.41	299.526	300.488	476.071	375.749	376.381	207.614	443.625	296.963	359.904	299.608	436.924	440.933	446.304	381.757	415.949	355.006	349.768	315.22	484.76	314.461	181.841	366.737	316.332	458.701	201.429	479.128	265.917	381.36	252.216	435.706	420.729	490.9	371.579	394.961	349.32	337.483	245.926	292.579	443.221	429.55
BAD	1793.05	1163.23	1367.62	1235.17	1303.41	1575.83	917.934	991.942	1062.84	993.499	2285.21	981.273	873.172	1222.48	852.618	1435.84	1486.87	1062.35	1076.73	1130.17	1302.83	1129.66	1360.13	1357.21	1754.1	1072.23	1498.29	1087.94	1276.95	1140.14	1155.93	1085.41	813.133	1411.85	1574.64	1395.88	1451.05	1213.56	1086.71	1047.95	1062.24	1227.41	608.529	1026.07	1482.65	1067.75	918.44	1477.86	1045.66
LAP3	9296.54	10337.4	17579.9	15257	8833.31	11680.5	9865.35	8463.78	12303.8	12749.2	7854.85	10656.1	10610.5	10606.9	10075.5	11102.5	12537.1	7374.85	16672.4	13584.4	12519.6	10327.1	10511.3	10659.6	10970.5	9426.44	12078.8	11896.1	9082.79	14499.2	11104.5	11919.2	9381.21	12580.3	8423.26	10433.6	9166.92	12849.5	7848.99	10455.3	10697.7	7115.03	8104.52	5618.65	7730.92	7935.75	10375.7	7239.01	8571.37
CD99	11928.4	10384.6	13223.9	10278.8	10191.8	11028.7	15616.7	10790.4	8217.35	8589.99	13735.8	11961.9	12450.6	10476.2	9922.98	11654.1	11541.1	13550.1	10798	8750.21	10855.8	10295	12273.2	11352.5	11579.3	5075.21	12917.3	10692.4	8713.93	18115.4	11853.7	11266.7	10517.9	18084.8	14864.2	5553.74	9002.8	12116.6	9675.26	7630.07	12503.1	6506.05	3857.38	4897.16	9672.75	7216.38	8709.39	6683.23	9457.24
HS3ST1	335.118	459.573	437.899	302.675	757.398	677.605	402.268	379.753	292.671	367.427	319.146	502.294	689.194	455.298	477.679	446.593	414.207	265.966	1205.54	466.692	466.511	742.056	460.707	367.504	2425.33	496.871	374.066	287.547	535.604	793.069	573.788	512.255	876.652	1142.66	439.626	517.433	3152.3	908.961	1647.05	777.269	448.818	1399.42	377.361	651.981	620.784	593.226	815.177	499.597	665.978
AOC1	18.5799	58.7312	16.9923	24.3302	25.0473	22.5839	29.8772	12.6062	26.4444	27.868	37.3377	41.7616	25.7258	20.6182	76.2827	6.92644	41.6896	37.31	88.9689	45.9111	21.166	81.1749	24.9837	15.1812	13.5982	3592.6	23.1443	30.6943	22.6036	44.9467	46.3849	55.8951	3.12757	1439.56	30.0625	135.342	2511.55	572.05	46.3693	38.6948	57.1129	84.2132	686.244	162.738	190.365	519.838	690.177	85.0603	253.998
WNT16	3.69485	11.5993	8.96895	7.48664	8.01503	6.78159	13.6961	19.0781	4.24789	1.82687	8.77895	3.8746	1.4034	3.09859	22.1679	19.8144	5.50838	5.17233	0.00840437	10.2294	0.0408081	4.29702	0	1.74267	22.912	11.4738	2.12538	7.21679	9.05907	16.4075	14.8912	7.5352	18.4914	4.76348	11.6962	15.3614	25.85	96.4314	8.2509	6.6796	11.2436	21.5612	8.3059	9.50424	17.6862	25.8299	8.06092	9.23163	30.5618
HECW1	13.9446	12.4327	13.4296	11.2222	24.0442	18.0264	75.2253	22.612	5.31153	5.54569	9.90931	29.1571	29.7588	2.28476	22.2392	8.90777	4.43298	13.8722	22.4945	30.7249	6.71848	64.9812	9.99338	12.5154	18.7986	38.5616	18.9174	5.37678	19.9332	17.7296	21.3551	11.4028	10.3426	25.8463	5.77445	110.414	64.9796	476.171	23.7075	47.1524	11.1738	27.4508	44.591	206.621	106.198	114.298	32.4196	119.369	173.745
MAD1L1	1719.49	1281.69	1423.25	1315.76	1587.93	1501.57	1494.3	1431.42	1403.02	1287.47	2188.74	1230.97	1200.28	1273.5	1342.98	1435.84	1762.99	1708.33	1589.02	1343.09	1204	1311.18	1343.15	1508.71	1030.56	1164.58	1821.9	1505.77	1475.43	1845.87	1606.25	1455.08	1171.66	2148.21	1912.98	1606.12	2137.03	2005.47	1191.78	1299.18	1571.61	1105.23	1273.01	1512.45	1914.19	1457.09	1395.57	2385.01	2154.17
LASP1	14686.8	17566.3	15892.8	15023.6	14165.2	16254.9	16056.8	15919.4	14474.9	15821.8	17959.8	15126.3	18977.2	15668.4	17300.9	18416.4	17851.3	15056.7	16131.5	15137.9	17558.8	13947.7	14836.6	15471.7	14094.6	15135.1	17916.5	17539.4	14853.1	21564.1	14720.8	16162.3	14923.9	26430.8	16336.5	13697.7	15846.1	15497.4	12420.3	15606.7	18805.8	11463.9	16255.7	23728.3	16650.1	14362.6	22108.9	15863.9	15190
SNX11	1532.35	1526.64	1728.37	1502.26	1492.76	1900.02	1480.57	1629.45	1677.7	1666.09	1880.63	1460.26	1611.07	1724.09	1626.83	1919.07	1661.11	1651.8	1938.72	1621.6	1817.07	1521.52	1488.05	1548.14	1719.66	1464.53	2068.81	1819.6	1366.66	2247.13	1445.61	1688.01	1046.87	1720.94	1781.48	1199.06	1284.64	1943.61	1448.26	1253.65	1674.8	1376.19	1841.09	1111.73	1622.09	1182.08	1442.73	1725.92	1537.09
TMEM176A	2721.19	2986.51	2865.37	1804.01	2426.48	2430.21	3552.35	3475.97	2167.92	2008.41	3457.5	2518.29	3945.69	2255.96	3368.02	1523.96	2114.75	2067.34	4250.66	1764.65	2335.78	2675.73	2353.5	2052.82	1541.14	2466.52	1621.24	2650.71	2501.34	5192.89	2422.36	2691.91	2100.77	5865.17	3146.65	3475.29	2947.07	4155.61	2051.87	2251.86	3748.54	2292.21	4010.8	2190.15	3437.82	3292.74	5393.92	2731.89	2646.48
M6PR	3423.11	5007.47	6362.49	6207.74	6163.38	5350.04	6637.23	6191.42	5473.66	4869.89	2435.56	5089.05	5858.65	5482.48	5814.62	6300.85	7695.16	6030.83	6646.47	6064.86	6874	5784.95	7325.34	5286.3	6117.49	6096.06	8353.02	6453.6	6280.57	10453.3	5010.92	4099.07	4757.45	8139.79	4658.46	3827.62	4217.47	4752.4	4829.91	4323.41	6552.6	3853.39	4745.78	3970.09	5938.4	4598.81	5714.17	5840.31	6275.9
KLHL13	140.571	76.5543	102.273	88.0703	80.1487	174.448	108.9	113.915	61.3033	57.6415	74.6086	145.734	261.862	143.535	124.986	69.3119	48.2617	95.5891	94.0805	83.4086	137.733	127.069	196.875	46.5598	811.038	65.2971	54.6619	88.5943	90.5962	47.305	222.869	162.621	288.441	110.12	160.767	747.968	962.739	125.621	500.564	84.2312	99.0438	161.669	37.3403	102.776	154.936	90.6339	60.0455	68.9785	105.272
CYP26B1	668.417	2297.34	649.691	1147.11	390.722	1876.2	342.703	1326.6	855.749	287.414	1462.76	681.062	298.06	868.445	295.527	558.489	1345.47	771.998	549.107	673.662	713.07	196.5	326.792	1080.25	133.673	133.928	807.986	2136.31	139.514	87.4407	234.863	628.769	358.789	251.771	272.982	274.553	761.435	463.531	419.234	1611.61	4397.04	94.5352	175.212	119.904	584.192	280.443	147.833	259.578	227.206
ICA1	1147.87	1107.12	956.594	886.535	827.529	1123.37	1222.71	963.912	1380.82	947.917	1062.6	908.405	1110.55	1124.39	1065.49	779.31	1049.71	1204.08	1756.7	1022	1270.62	1301.56	1002.36	1144.75	1641.34	2360.47	1238.77	966.753	1050.37	1100.01	1124.37	1240.57	1236.89	1372.13	1142.35	2211.9	2028.46	2787.87	988.862	1407.08	1007.37	1565.41	5145.88	4214.76	2174.22	1601.62	1878.4	3893.84	2512.57
DBNDD1	406.83	344.685	355.355	317.685	395.731	341.077	365.565	294.763	284.209	348.838	740.105	251.626	218.217	381.174	323.045	353.512	358.307	260.771	430.485	327.874	375.417	446.302	332.788	388.156	398.853	649.038	270.044	350.885	435.932	352.912	344.452	347.683	270.157	720.019	313.997	2278.21	341.313	902.316	312.121	323.67	299.718	441.188	2010.02	839.512	834.29	477.817	890.844	878.47	2710.41
ALS2	1791.16	1873.13	1705.03	1925.86	2015.72	1768.34	1855.27	1812.12	2200.65	1833.54	1489.18	1863.46	1878.08	1974.5	1653.31	1765.58	1661.11	1743.08	2120.73	1765.54	1698.25	1459.6	1699.92	1913	1730.11	1757.13	1559.24	1845.82	1641.27	1756.21	1741.8	1566.1	2170.3	1575.77	1680.98	1181.78	1683.66	1916.96	1760.35	1657.55	1813.46	1461.36	1644.12	1577.19	1395.27	1592.97	2046.74	1390.63	1552.8
CASP10	1859.11	2004.05	2153.73	2393.5	2121.92	1867.41	1937.8	2105.09	2298.91	2361.93	1629.55	2814.63	3458.12	2011.95	2079.08	2195.35	2041.32	2029.97	2433.63	2225.45	2461.26	1870.67	2040.7	2128.14	1502.5	2000.67	2596.27	2127.07	1848.81	1703.13	1953.48	1754.72	3289.45	1668.29	2662.61	1791.4	1840.73	1738.95	1596.59	1998.98	2434.86	1759.81	2342.82	1492.46	1729.43	1668.49	2766.89	1523.86	1744
CFLAR	19720.5	26758.3	23280.1	24128.1	25774.6	18248.4	33612.4	20316.7	26227.2	37359.2	23463.6	23474	17957.8	25866.3	33873	19875	17371.4	28584.1	17038.5	25072.9	18983.8	21287.3	20887.7	23885.7	20666.2	14311.3	19833	20437	27813.1	29830.5	16815.5	22668.2	17810	14221.7	16268.7	15890.4	13073.8	11828.2	21213.9	20123.3	21683.2	18693.4	11415.6	18318	15168.6	18361.7	20707.6	11817.3	14846.3
TFPI	8401.9	9501.05	9069.02	10544	10847	7928.81	8243.85	8858.06	9067.81	9323.06	7454.58	6970.97	8819.95	8612.51	9778.93	7911.96	7588.91	7007.12	8908.32	11147.8	10875.8	9428.02	9580.9	7575.81	6492.34	8725.24	8189.14	7358.86	7031.86	5378.42	8398.91	13296.2	8528.99	6983.27	5592.3	2320.36	3244.63	4078.5	7500.83	8787.68	7487.45	26766.1	13034.8	6805.6	7228.58	9140.44	4077.85	6174.52	7741.85
NDUFAF7	618.153	665.351	676.635	575.408	549.014	596.584	535.175	587.755	780.731	564.658	500.063	613.055	534.709	554.203	542.283	535.714	573.069	575.51	608.409	684.764	628.65	689.748	692.559	641.85	607.68	734.755	590.496	582.406	613.551	500.461	544.07	512.292	496.595	277.539	629.83	680.659	569.121	845.222	469.711	623.042	635.901	596.92	683.151	896.643	604.143	617.997	609.6	567.29	835.078
RBM5	5818.49	5771.7	4712.18	5120.63	5517.19	5235.22	4745.33	6221.26	6295.59	5466.2	5005.91	6047.99	4226.22	5496.85	5223.63	5783.95	4446.42	6027.37	5309	6151.75	5316.84	6688.23	5447.53	5901.27	4744.48	6546.41	4822.71	5693.92	5734.99	3813.41	6000.68	5051.05	6169.86	2394.15	5970.98	4533.25	4761.72	2976.3	5407.76	6163.16	5774.85	4769.48	4976.94	5270.31	3888.14	4236.42	4989.95	3052.26	4829.32
MTMR7	112.654	70.3353	90.6267	86.2102	104.192	73.1957	100.842	84.0808	113.037	114.431	83.3557	110.761	97.3582	89.2936	94.266	63.3717	111.752	78.2168	70.5609	63.8286	113.276	111.037	68.9559	68.0996	143.025	65.3252	79.8626	71.4203	119.648	73.2195	77.0474	145.668	71.2541	42.2365	68.6097	84.4685	177.055	5246.97	146.266	91.8505	52.291	70.4726	135.802	56.1348	37.6782	29.1643	49.4865	43.7146	83.1095
SLC7A2	1708.29	1841.93	1671.81	2082.36	1916.54	1244.98	3546.6	1719.86	1706.24	4179.7	1075.79	1306.74	2841.12	2439.41	4936.54	1809.15	1733.44	2064.74	1942.82	4342.87	1356.19	2351.14	1286.18	1876.23	7025.78	1922.19	2368.27	1988.69	3027.02	2412.42	1562.59	3031.89	1398.2	706.027	1722.8	1262.42	5965.79	22572.7	3767.91	1294.1	1318.49	1628.19	3294.46	6619.13	802.247	902.76	1058.21	319.316	1241.47
ARF5	4987.15	4170.22	4722.96	4320.29	4366.06	5249.84	4375.19	4005.82	4001.98	4296.86	7070.72	3876.54	4527.48	4790.31	4374.21	5189.81	5675.77	4585.06	4514.49	4168.14	5294.61	4274.12	5096.76	4563.77	5880.46	4029.96	5666.4	4077.8	4512.4	4992.42	4880.02	4559.24	3810.91	5179.2	5702.91	5431.83	4646.06	4269.82	3811.19	4095.76	4377.19	4044.33	4828.71	4274.67	5422.81	4454.3	3775.51	6637.23	5396.48
SARM1	469.198	554.021	454.966	452.641	544.004	499.774	390.795	547.984	606.412	394.415	407.947	507.156	538.566	483.247	421.543	525.814	508.411	552.931	456.053	403.671	414.304	558.415	441.719	467.037	265.224	388.165	311.024	556.197	546.497	389.519	397.369	432.746	540.023	518.631	469.845	701.79	439.253	444.488	551.077	558.136	540.803	693.307	510.034	941.399	481.327	792.675	425.066	646.476	591.198
POLDIP2	3765.72	3425.6	3589.55	3757.06	3876.16	3904.74	3510.01	2998.48	3556.13	3668.93	4907.19	3364.52	3776.71	3436.21	3159.39	3786.65	4750.99	3581.8	4799.77	3673.32	3751.89	3672.98	4359.23	3881.59	3784.93	3553.5	3941.17	3569.55	3473.79	4068.29	4184.6	3363.12	3199.72	5440.24	3871.14	3968.74	3911.68	5300.65	3578.4	3395.98	3318.13	3436.21	4078.18	4363.2	4340.69	3748.95	3919.4	5568.16	4249.19
PLXND1	17173.4	22145.4	15611.9	18669.1	18221.6	17657.4	16682.5	19748	19044.2	15127.9	18263.6	18631.7	31501	18162.9	18262.6	18841.2	17124.9	14830.6	23329.1	16851.5	21020.7	15991.3	16466.5	18600.3	6133.17	13969.7	15213	17835.1	15919.8	17543.1	16024.4	13960.5	21074.8	24256.8	21526.1	17292	8261.36	8878.5	14021	20497.7	20387.2	13719.2	7420.34	9295.59	13881.7	15907	15088.5	20160.9	12812.3
AK2	4991.79	4715.32	5471.38	6123.4	5710.54	5676.45	5012.33	4737.36	5488.44	6058.78	5945.67	5286.28	4863.68	5061.43	4777.74	5410.63	6123.93	4258.16	5972.62	5452.5	6215.37	5730.49	5549.47	5188.59	5756.22	7199.43	6219.07	4959.56	5562.79	5346.5	6119.53	5929.12	5287.27	6331.18	5467.51	13737.1	5112.46	6293.38	4292.23	6660.5	4502.9	8560.97	7876.45	7824.07	7786.22	8678.83	12782.6	8349.38	7743.71
CD38	287.628	517.446	1371.24	1712.23	1116.06	458.183	2572.39	306.489	519.815	678.136	369.599	834.568	460.091	927.416	1040.07	341.625	1001.49	1915.34	1148.3	1183.86	415.45	469.831	704.551	839.945	1755.13	435.52	894.151	1698.47	1670.34	1202.64	1294.3	1576.61	544.592	924.906	273.788	875.531	1600.99	3858.75	964.135	524.332	1200.87	645.04	1064.65	2104.53	482.476	468.118	724.148	1148.34	646.583
FKBP4	2939.03	2623.08	2712.8	2469.4	3364.21	2926.59	3142.15	2494.81	2626.43	3058.69	3087.98	2900.12	2796.96	2791.08	1988	3419.28	2973.77	2698.52	3296.65	2363.4	3165.44	2697.09	3146	2733.24	4102.32	2065.2	3062.78	2654.32	2427.02	3928.97	3194.86	2425.81	2954.31	4179.41	2894.54	1995.88	5006.11	3835.8	3293.08	2493.85	2740.24	2471.99	3364.97	1558.13	3281.81	2625.14	4589.22	6327.13	2313.01
KDM1A	2670.92	2456.53	2323.33	2296.97	2621.84	2448.22	2342.31	2541.85	2334.84	2607.51	2638.38	2401.7	2608.32	2611.66	2117.21	2591.44	2801.73	2608.98	2635.07	2434.96	2422.41	2535.86	2626.33	2426.65	2717.84	2800.81	2697.14	2643.48	2652.7	2241.31	3070.45	2577.3	3028.28	2824.94	2746.31	3744.11	2765.22	4026.17	2473.16	2178.53	2622.59	3156.69	3679.06	2697.48	2741.85	2411.59	2498.57	4007.6	2781.36
RBM6	4099.93	4389.34	3105.83	4982.88	4522.35	4823.24	4417.58	5197.65	5307.77	5025.26	3760.2	4866.57	4762.55	4869.27	4929.18	3663.86	3556.7	4395.54	4502.22	4913.39	4791.48	5150.71	4519.12	4467.86	4363.37	4160.73	4164.97	4585.16	4174.35	3443.99	4530.92	4206.14	4712.35	2117.86	4185.3	2677.51	2878.56	3093.39	3824.57	4745.9	5338.07	4105.47	3513.2	5378.84	2874.62	3459.88	4893.28	2668.71	3949.92
CAMKK1	515.726	752.623	930.599	1201.46	852.574	735.043	595.928	976.603	821.949	599.066	621.788	781.135	527.819	676.997	899.199	484.22	896.29	1178.92	762.813	713.688	806.363	926.783	1035.34	915.271	527.295	1292.2	1089.56	1003.87	683.321	865.119	640.624	499.5	708.53	591.247	755.464	832.344	942.164	1237.38	736.488	1061.52	938.182	2043.07	844.867	935.659	1287.86	1237.02	486.815	718.86	859.082
RECQL	1514.65	2068.18	2821.42	2724.33	2263.18	2393.04	2227.7	1859.13	2764.81	1973.07	822.486	2540.64	2542.18	2300.66	2209.34	1837.87	2367.83	2417.73	2094.15	1992.93	2404.62	1722.26	2596.35	1980.23	1567.23	1646.77	2504.86	2009.5	2103.49	2317.99	1778.93	1769.49	1867.02	1754.89	1257.96	1376.67	1435.76	2225.35	1796.41	1827.85	2492.13	1032.97	1353.87	1731.38	1519.2	1756.91	1697.16	1477.91	1987.89
VPS50	1239.09	1491.02	1609.02	1599.73	1607.97	1555.59	1277.74	1455.84	1951.31	1288.4	974.894	1667.21	1377.54	1338.9	1122.69	1392.27	1502.22	1560.52	1704.56	1408.68	1574.95	1278.08	1517.03	1479.12	1152.72	1575.71	1508.8	1569.09	1432.83	1278.23	1327.7	1253.65	1456.12	1416.57	1263	1446.76	1059.14	1179.28	1429.71	1556.36	1562.77	1335.77	1819.31	1431.55	1289.06	1632.88	1081	1414.74	1092.76
HSPB6	3405.47	2338.07	3321.27	1957.71	2063.81	2305.26	3319.72	3335.82	1429.45	1710.73	6205.4	2485.26	2820.59	2114.02	2386.22	2470.63	1740.02	2363.82	1197.4	2647.9	1486.13	2146.14	2831.2	2596.99	1259.23	508.242	1641.21	2016.73	1622.22	1722.02	2421.44	3209.31	2559.41	2818.89	2807.63	747.844	2927.94	597.715	2353.65	1910.52	2222.97	774.926	111.978	526.339	1501.48	1119.52	660.738	745.319	374.072
ARHGAP33	427.315	625.332	390.362	370.173	435.805	281.437	441.17	546.204	414.14	427.924	379.423	309.923	312.586	298.998	568.726	184.179	201.652	449.481	260.753	378.993	305.462	448.437	244.844	502.033	256.867	428.265	260.589	334.603	455.875	227.855	258.091	262.795	386.179	172.184	337.479	471.368	685.936	1162.22	506.787	497.418	471.468	621.039	708.02	579.669	520.045	667.585	1233.32	430.647	822.168
NDUFAB1	2117	1768.01	2038.86	2027.07	1703.15	2215.2	1866.74	1508.27	1702.01	1852.14	2712.92	1787.67	1623.21	1827.74	1497.62	2005.22	2181.56	1660.48	1989.85	1785.12	2471.25	1863.19	2193.6	1939.89	2965.28	1670.48	2491.19	1510.28	1740.06	2256.61	2006.41	2262.89	1592.66	2248.97	2258.83	3364.89	3185.52	3538.84	1995.22	2053.75	1773.06	2051.38	3458.26	4264.22	2386.68	2289.72	2609.93	3524.17	2494.08
PDK4	20974.5	6226.8	9633.46	5027.83	73875.4	9311.07	37126.7	5743.77	10370.5	4435.44	6480.84	4672.24	5253.83	6894.72	14494.2	8073.37	6567.74	17317.1	5975.7	8533.02	4411.68	34414.8	23782.9	4911.55	4712.13	2886.52	7299.21	7486.36	28956	6155.03	4138.14	6219.75	7983.26	17177.4	12957.2	1489.94	5715.75	928.942	56467	7609.06	9568.61	1005.42	1505.23	1233.55	2270.53	1117.39	1923.04	1340.16	1544.45
SLC22A16	8.33993	11.5174	41.2432	6.52533	31.0582	9.07527	93.9177	5.37316	6.37005	5.54336	17.5982	3.87112	16.6023	4.67485	69.9029	75.2583	19.7742	24.2758	24.5523	10.1366	46.6816	12.8507	19.9869	12.4919	1261.34	53.9012	14.738	48.8099	1.76553	122.605	1.82098	15.2577	14.7679	16.4789	9.95992	18.2202	633.872	1.87906	284.139	4.13021	48.3401	23.1594	18.6781	1.87912	116.047	21.6077	8.02329	6.97223	80.4037
ZMYND10	277.392	128.197	117.499	251.126	126.234	345.616	126.136	141.009	120.472	295.789	259.939	363.353	217.423	762.389	136.661	618.895	348.477	87.7316	99.1988	378.091	576.461	250.95	1222.22	156.819	7883.52	113.496	96.6933	519.992	942.574	626.723	1059.42	717.305	1435.23	440.251	344.996	117.1	9496.06	144.648	3518.53	145.767	169.95	1116.52	69.476	216.04	1151.79	640.654	94.9932	198.741	120.966
ABCB5	3.68632	1.7248	69.2262	5.58863	4.00841	2.31696	75.4188	110.585	16.9255	7.40465	6.63159	44.7033	177.781	1.49067	33.8886	7.91667	24.1261	76.7021	65.4174	13.5598	15.5951	12.8441	7.99458	8.91031	0.0187982	8.07554	0.0215952	14.4282	1.76401	42.4305	11.1063	7.83736	70.5583	32.7505	13.3333	61.4928	44.756	9.49443	14.4324	3.28745	29.8349	1.64778	8.31184	0	2.26869	8.66766	33.3621	20.7023	1.80782
ARX	13.0024	1.72474	1.74157	5.58878	5.01026	29.27	2.36834	10.8043	0.0239811	0.895988	15.3908	11.6453	5.95488	12.6667	4.2686	54.4707	32.8639	6.88479	2.05682	15.2705	45.4833	4.30765	61.9613	18.7919	215.806	17.9173	0.0215296	30.7499	52.6347	11.8867	46.4612	60.1578	110.446	32.8771	8.29128	309.134	515.785	29.4788	321.37	392.961	7.95935	229.637	562.856	154.179	128.398	119.752	99.8825	32.2374	201.357
SLC25A13	597.649	1962.31	1032	912.785	736.36	694.54	799.893	809.286	790.264	846.523	615.218	976.42	1268.09	837.29	982.875	837.735	1072.7	839.79	1145.24	856.772	1009.61	1018.61	1056.33	799.603	980.429	1680.44	1026.53	769.597	901.743	987.871	940.53	887.552	1020.58	1214.05	759.593	2603.62	1236.22	1681.86	790.061	754.511	752.694	928.901	2028.71	844.257	1093.22	998.732	1185.06	1549.07	1720.01
ST7	1951.28	2020.08	1991.29	2253.86	2510.64	2091.4	1820.92	1764.17	2440.48	2707.06	2187.69	1843.05	1815.66	2302.25	1951.98	2178.51	3177.53	2622.04	1861.02	2373.65	1805.99	2003.07	2141.64	2421.29	2163.42	2849.88	2398.74	2180.43	2624.62	2085.51	2955.33	2399.76	1579.63	2376.53	2094.7	3565.56	1315.37	1300.16	1551.27	1662.55	1927.84	2464.29	2360.45	2775.55	2127.76	1981.25	1814.99	3425.37	2002.65
CDC27	3024.68	3070.21	3612	3576.2	2818.2	3233.89	3277.38	2955.08	2961.34	3780.58	2347.81	3318.86	4535.17	3253.6	3924.07	2959.8	3070.2	3348.82	3693.39	3401.64	4310.53	2660.79	2826.2	3125.88	3470.65	3095.82	3463.1	2989.84	2666.28	4162.68	2774.24	3194.82	4083.67	2733.62	2903.78	2532.54	2507.84	3400.83	2608.09	2673.45	2962.73	2736.07	2971.04	3027.78	2527.2	2693.07	3151.3	3170.5	2943.95
SLC4A1	124.011	105.338	32.2971	41.2443	11.0213	53.9651	24.1056	27.1071	16.9278	11.1274	26.3403	23.309	12.8135	36.6883	88.8716	23.7628	4.43502	51.35	42.942	11.8488	39.972	23.5099	7.99457	0	40.7147	14.626	21.0315	2.66214	17.18	85.8855	9.2466	11.5167	23.3618	25.6287	80.4005	3.82038	30.5003	11.4134	11.3359	17.7382	25.9414	12.0225	3.1284	0	13.2848	2.19691	0.721413	6.94764	7.36135
CALCR	3.6863	33.8457	34.1008	32.7983	18.034	53.9558	25.2438	37.989	142.419	9.26585	15.3944	27.1987	18.1634	14.2612	23.317	36.6393	23.0368	22.5656	51.1155	41.7649	26.6778	33.1014	47.9697	23.279	18.8106	22.8315	21.0304	12.6149	32.6226	28.3531	40.8662	26.0599	20.4761	4.776	6.61056	17.2627	26.0269	24.7321	22.6717	24.4	16.0293	10.2471	89.1008	15.2064	26.5845	17.2911	6.39891	115.653	65.6396
HCCS	985.873	1064.37	1229.43	1133.96	872.612	1114.36	1131.04	988.332	956.13	1219.57	898.124	1023.05	1131.1	1144.34	1031.6	1149.66	1208.57	1120.61	1159.55	935.122	1202.87	1061.33	1154.27	1116.96	1447.14	988.057	1440.5	1008.36	1015.93	1478.8	1175.44	992.952	933.563	1236.28	1163.34	1523.57	1500.64	906.111	966.195	1018.43	967.92	809.34	844.881	845.211	1134.15	1063.44	1702.91	963.475	920.946
DVL2	2439.11	2412	2238.08	1900.55	2448.52	2801.62	1894.25	2335.68	2289.41	1891.2	2762.28	1982.96	1952.6	1925.82	1763.46	2358.73	2579.3	2111.69	2064.5	2424.76	2239.14	2294.55	2414.46	2349.57	2111.21	2100.38	1949.05	2496.98	2255.74	1635.86	2118.75	1900.74	1999.11	2013.61	2484.22	1969.97	2440.47	3376.11	2044.65	2296.63	2416.33	2307.76	2457.89	2245.38	2305.87	2092.33	2134.48	2783.46	2325.06
PRSS22	635.83	562.888	310.445	659.748	688.271	646.125	630.294	481.027	529.317	1444.75	887.127	426.505	345.229	677.804	893.899	675.337	969.687	512.886	835.41	751.177	456.533	665.206	627.6	684.865	2269.82	1740.21	450.769	614.046	620.786	1278.09	589.558	632.474	554.697	684.946	748.696	1450.59	3955.08	221.745	879.676	1098.51	377.085	2368.87	2202.87	4511.77	2352.32	1883.09	1616.69	3205.97	2167.11
UPF1	8157.99	8261.2	6869.5	6442.95	8138.03	6531.94	8406.55	7196.94	6709.74	8362.1	10504.1	6808.72	6359.15	7346.15	7964.65	8337.76	7894.6	8401.63	8375.58	7479.51	4899.25	7025.65	6094.12	7831.31	6578.99	9303.91	6246.4	8884.56	9899.4	8647.61	7904.97	6855.5	6765.17	10652.2	7136.79	6438.89	10429	7522.18	9074.74	7671.4	8464.33	7958	8924.5	7219.65	8861.7	10000	6907.35	7864.8	6325.75
SKAP2	4618.49	4707.33	4959.88	4384.03	4305.95	4315.6	4449.66	4167.69	3901.61	3616.83	3630.8	5289.2	5206.81	4406.73	5843.2	4895.71	4208.64	4350.33	3299.72	4622.11	4081.77	3922.84	4220.31	4402.42	2812.87	2605.41	4887.84	4322.89	3932.37	4702.07	3834.56	4483.38	4538.14	3687.73	3784.89	3872.74	2346.11	4009.99	3622.69	4188.54	4586	2416.08	3395.03	3218.14	2934.38	3570.98	4351.86	2673.32	3201.66
SLC25A5	9398.95	8481.18	11083.7	10040.7	10874.1	10375.9	10903.6	9012.67	10557.5	10201.2	11272.9	9063.72	10031.7	9539.94	11059.4	9105.19	14673.7	12011.3	12875.7	9470.75	11528.9	12254.3	11453.7	10824.5	11528.1	11365.9	13102.2	9968.88	10898.1	13522	11692.2	10884	7681.27	15260.1	11678.8	16759.2	9965.11	9997.83	7812.94	13187.8	9433.84	11928.4	11550.3	10968	17986.7	11815.2	9304.33	11302.9	15216.8
CCDC109B	807.125	661.749	1119.05	1024.31	950.756	800.338	1088.63	895.195	753.289	906.992	819.168	1150.33	954.614	807.776	1255.06	896.159	1159.26	1236.27	1094.11	720.484	857.467	744.224	1066.32	857.875	998.18	797.619	1125.29	957.72	1016.85	1997.98	1053.81	1040.9	821.782	1244.5	915.382	1217.3	767.534	918.48	848.774	832.919	1043.67	798.145	925.741	867.1	748.023	1201.49	1172.04	524.859	1156.5
HOXA11	1.84723	1.7565	1.77167	1.86109	4.00701	0.0321129	0.0370849	14.7597	0.014744	1.84566	0.0249067	13.6794	1.4553	3.19883	0.0154216	1.9786	9.70636	1.70796	2.04909	0	0.0284224	0.017618	1.99861	3.59892	0.0115594	0	4.19006	1.78745	0	2.38226	7.50405	0.179295	0.105386	2.42969	0	0	0.0729019	62.9465	0.012259	0	1.51157	0	14.5196	0	0.0431899	0.0319171	6.41365	2.37338	5.50473
POLR2J	2379.54	1726.15	2028.99	1702.8	1734.2	2426.8	1691.43	1768.7	1749.55	1660.5	2962.93	1776.01	1506.06	1575.72	1613.07	1884.41	2441.23	1841.31	2181.07	1780	2194.7	2076.73	2283.55	1982.02	2743.93	2121.65	2602.57	1994.13	1868.75	1966.3	2116.9	1991.23	1470.74	2399.96	2543.64	2423.1	2596.35	2928.73	2095.13	1988.85	1661.04	2373.97	3750.58	1640.94	2835.87	2109.6	1298	3095.83	1880.71
DHX33	976.566	1043.89	1100.2	960.578	884.634	899.387	1253.64	1259.63	1096.63	1262.37	959.524	1010.42	1160.78	1057.41	966.993	1052.62	1027.79	1174.53	1098.2	933.425	957.424	1007.94	1120.29	979.796	768.484	1428.65	892.052	1044.54	982.403	1167.25	928.455	856.194	1133.81	888.596	906.204	943.7	1004.79	2154.95	872.459	1060.62	1157.38	1285.93	1752.95	1317.35	1003.58	1213.33	1055.03	1428.46	968.069
MEOX1	20.4423	17.752	102.307	67.4579	84.1556	22.5821	159.189	320.357	31.7241	26.9396	43.9073	83.5506	302.561	104.48	123.902	25.7407	37.3015	222.743	100.208	16.9496	26.7165	140.909	49.9679	62.7179	132.587	29.3243	75.6608	15.32	21.6984	16.6254	226.65	75.9759	150.729	32.8757	82.8552	120.956	662.799	127.536	187.461	28.5763	111.179	231.457	29.047	82.7909	104.037	163.927	64.9385	97.6526	175.524
THSD7A	1056.66	1002.94	666.741	813.452	985.82	413.153	1116.09	982.939	608.55	931.196	657.969	649.971	1580.14	799.041	1043.23	658.503	593.902	973.718	394.708	835.505	681.978	599.012	586.627	702.794	538.779	252.44	604.164	696.351	708.703	279.812	470.705	863.372	1650.15	408.62	900.468	211.186	487.652	305.512	886.856	561.504	731.07	237.331	224.971	275.058	298.791	252.41	593.367	215.958	778.74
LIG3	685.164	743.702	878.529	880.92	1001.85	826.222	1159.67	1017.28	784.981	1205.63	746.798	986.136	1061.9	1118.05	906.622	1037.76	980.668	883.264	1020.49	971.766	926.32	824.298	856.455	786.155	1004.44	1292.98	874.188	815.724	1212.63	1017.37	1021.31	917.108	1127.97	1108.69	819.907	1068.5	1242.11	2016.91	1018.73	815.225	995.325	1323.75	965.129	1118.4	1181.72	1026.77	912.743	1608.76	987.457
RPAP3	1174.86	1246.08	1343.4	1236.11	1098.03	1050.22	1070.33	1137.54	1405.12	1314.46	687.597	1225.14	1360.09	1246.42	1225.41	1072.42	1097.92	1156.25	1302.71	988.777	1296.17	1001.54	1228.22	1071.23	1480.55	1435.97	1362.75	1049.96	1285.11	1229.82	1120.65	1166.68	1130.96	1126.26	1033.49	1066.58	1201.99	2411.92	1249.46	1069.01	1077.53	1031.26	1428.5	1264.02	1441.74	1279.14	1430.55	1627.16	1369.89
ACSM3	413.33	447.11	490.862	492.939	703.298	437.886	226.965	519.036	720.504	252.068	381.637	449.83	354.396	377.139	385.539	322.812	659.599	417.27	1225.99	396.849	375.442	623.543	588.625	388.131	352.926	1151.77	472.82	467.547	622.632	357.669	388.08	573.092	451.565	519.842	549.392	1155.89	840.639	439.719	322.42	795.894	414.997	884.241	2357.25	2094.13	983.622	1293.09	1122.6	888.773	1251.72
AC004381.6	120.099	62.3071	91.5168	89.0184	88.1631	79.9504	99.7105	114.843	89.8113	57.6474	85.5539	66.0563	128.59	82.8882	141.907	86.1482	95.3398	104.317	103.277	74.9051	102.191	113.178	127.919	94.1114	267.225	143.076	73.5641	84.0852	84.2639	70.8724	108.629	85.2274	123.35	93.7359	82.8371	251.534	237.301	211.302	108.168	94.3546	79.6932	128.111	193.857	270.333	216.867	132.684	215.399	150.47	284.537
CIAPIN1	1659.9	1490.12	1517.47	1434.78	1383.56	1604	1414.11	1403.38	1286.81	1692.14	2033.05	1580.73	1566.96	1528.7	1306.98	1794.3	1769.57	1535.3	2062.45	1421.44	1728.22	1512.98	1567	1705.93	1485.79	1610.84	1716.84	1534.71	1644.91	1797.5	1739.95	1569.72	1544.7	1838.02	1724.5	2065.02	1415.7	2583.23	1187.66	1512.49	1550.64	1507.79	3199.08	1417.27	1625.42	1487.3	2402.73	2550.37	2338.92
FAM214B	1634.75	2345.2	2171.68	2311.03	1691.12	1921.44	2213.95	2004.72	1867.88	2084.7	1710.69	2292.89	2011.18	2248.02	2490.01	2066.62	2413.85	2377.74	1284.31	2061.92	2238.03	2146.13	2142.64	2217.79	2166.55	1569.12	2865.24	1864.8	1788.09	5103.12	1879.2	1767.65	1290.77	2011.22	1640.77	1429.48	1622.27	1303.97	1358.64	1847.26	2108.48	1006.31	1451.31	1121.25	1448.38	1437.67	1675.24	1150.65	1581.44
COPZ2	951.448	697.396	978.17	637.253	821.517	1264	778.101	649.232	575.801	673.494	1418.91	751.016	807.818	781.49	672.558	644.639	630.057	546.793	796.556	909.612	721.959	783.716	856.455	834.584	931.349	373.41	890.989	633.037	634.379	769.534	862.547	852.303	657.734	614.641	752.97	719.06	719.041	480.651	820.945	757.96	614.931	335.391	677.97	302.66	799.964	438.984	504.713	714.251	933.001
PRKAR2B	1785.59	1338.7	1539.92	1282.02	1807.34	1482.44	1724.61	1257.8	1806.58	1151.64	1290.69	1508.84	1721.42	1473.69	1518.79	1331.86	1184.49	1952.64	844.622	1412.08	1807.06	1200.14	1426.09	1306.99	1513.97	790.229	1498.3	1330.32	1328.6	1628.73	1482.76	1554.86	1416.94	1280.77	1188.46	7259.92	1059.13	737.634	1903.52	1391.96	1156.53	610.631	1051.17	709.095	854.233	1093.64	764.79	1776.41	1029.95
MSL3	1529.55	1770.7	1670.93	1842.45	1724.18	1713.19	1579.12	1916.11	2105.57	1773.07	1414.61	1988.79	1531.94	1881.2	1871.48	1818.07	1619.48	1732.65	1791.48	1545.79	1697.13	1763.89	2037.7	1410.97	2195.77	1666.41	2029.94	1726.44	1736.44	1868.32	1627.59	1519.88	1621.65	1313.57	1737.91	1815.41	1510.14	1719.92	1558.47	1498.17	1836.8	1499.19	1258.5	1589.55	1380.9	1526.12	2028.01	1221.85	1669.19
CREBBP	6214.14	7824.77	5726.23	5481.43	7906.6	5106.92	8333.19	6762.9	7512.66	8307.23	7006.06	5800.24	7887.41	7042.34	10194.1	5730.48	5612.25	7112.34	6542.17	5552.13	4612.69	5182.76	4618.06	6262.53	3820.44	7017.96	4230.12	6607.34	7301.06	7321.02	5424.09	4956.87	7429.96	6888.4	6053	7499.73	5993.21	4878.98	6411.03	6903.35	7755.1	6064.82	10486.7	14100.5	6393.18	7937.88	6492.83	9514.86	7263.37
TSPOAP1	1161.82	1755.58	882.097	1230.48	1479.73	1404.77	1021.07	1435.95	1517.11	1816.81	1332.36	1453.46	949.237	1386.76	1456.3	1115.99	1106.69	1336.21	1031.74	1504.93	1056.29	1248.18	1497.05	1314.17	2348.19	1776.8	1010.79	1597.13	1724.68	924.189	1227.42	1142.74	1656.38	658.007	988.278	1258.59	2802.74	1109.81	2012.7	1414.74	1167.03	2421.42	794.085	1924.63	1172.87	2181.79	1570.41	228.6	756.514
MPO	39.0723	73.9263	42.1387	64.6559	48.0894	250.671	41.3095	34.3188	175.293	18.5668	48.2799	38.851	18.1238	47.7827	273.073	37.6248	48.2414	85.216	121.667	108.232	26.7122	49.136	105.933	20.5621	64.7409	13.7907	76.6998	48.8066	25.3278	77.8892	35.2503	59.3241	29.254	57.2846	41.8891	48.0103	57.7672	58.0842	45.3175	95.5174	52.4543	19.7262	13.4947	17.1114	70.7246	32.3676	32.4846	29.8871	40.6475
PON1	23.2715	9.74757	5.32985	36.5806	10.0193	20.2791	32.0413	21.6931	50.6479	24.1866	20.847	12.6194	33.5589	7.87384	13.7895	11.8788	25.1979	11.2466	14.3231	36.6976	10.0458	42.6575	21.986	17.006	7.33102	36.0476	29.4093	10.811	24.4706	13.0498	29.7263	38.3471	20.3877	5.94532	21.6852	127.695	10.7275	7.588	10.3173	50.5205	8.75769	326.358	302.616	88.5152	59.7868	258.705	45.4334	177.867	145.062
GCFC2	916.993	1048.36	879.436	865.93	854.578	832.964	782.695	895.206	886.394	885.603	675.519	943.389	1019.32	750.368	807.064	771.39	806.456	856.322	811.895	843.157	845.239	741.015	815.481	865.058	948.058	724.886	734.447	741.566	871.842	734.146	916.396	1079.57	1114.85	755.138	729.473	965.787	942.198	841.397	873.485	904.641	865.594	1036.48	843.836	1028.93	775.655	774.391	767.269	746.436	722.346
WDR54	714.037	544.182	608.406	459.184	458.848	792.433	453.846	505.445	525.091	439.054	773.095	615.965	598.588	809.416	515.815	837.737	713.32	539.841	529.68	552.702	750.829	542.425	923.412	548.591	4040.52	357.064	511.706	734.341	773.058	597.246	975.833	728.518	1142.33	650.97	750.404	501.116	4514.27	871.852	1830.38	502.42	552.01	932.372	1105.07	556.802	794.47	717.238	677.02	1142.56	611.487
CROT	874.166	971.753	870.461	806.886	786.452	966.894	688.741	902.441	925.481	669.768	933.192	854.974	784.974	960.94	645.026	1001.13	909.443	789.371	858.93	980.3	841.907	894.757	1019.35	948.436	902.119	814.803	817.448	955.923	719.572	658.623	851.398	710.131	871.072	920.197	714.384	1121.31	1236.16	467.317	915.719	946.787	928.452	958.178	955.794	582.502	714.812	826.162	623.365	844.042	790.702
ABCB4	16.7328	15.0989	28.7151	18.7241	11.0212	24.7803	51.4538	47.9877	23.2528	35.3641	12.1063	30.1194	28.1373	19.0792	59.2478	28.7166	24.1204	12.9833	12.2806	18.6919	21.1294	26.6983	27.9822	21.4909	15.6785	75.5031	10.5315	13.5247	7.20061	37.7168	25.0596	25.9677	43.3369	46.9163	36.7632	79.6676	59.1192	53.2778	20.6181	37.854	45.8392	59.2841	205.237	22.8165	56.481	62.5896	32.4083	46.0097	165.365
KMT2E	5759.84	6221.51	5165.36	5323.99	6126.31	4628.54	6285.44	5875.83	6618.87	7870.94	4452.15	5737.09	7814.42	6434.68	9638.03	5008.6	4423.41	6341.21	5276.28	5823.84	4492.73	4488.74	4449.17	5306.92	3888.31	6338.81	4397.18	5755.42	5313.55	7332.8	4459.41	5224.85	7527.16	5223.67	5080.6	5620	4326.09	3469.34	4995.74	5470.07	6468.77	5528.97	7334.27	6134.57	4351.76	6644.73	4607.87	6667.07	4615.92
RHBDD2	5365.1	5709.34	7021.18	7790.61	5540.23	6103.07	5227.78	4650.54	4984.51	6147.14	10401	7276.05	4640.01	6664.33	6469.16	7986.23	9955.6	6370.75	3437.77	6585.24	5602.3	6070.03	7309.35	7843.87	7268.1	4584.87	10164.4	7241.31	7602.85	8183.76	8991.29	7273.19	3660.02	9192.26	5797.54	4530.36	5715.75	3657.8	5084.33	4635.35	5703.04	4239.58	5575.1	4058.6	6254.87	5637.42	4892.35	5190.4	4450.56
SOX8	54.9182	63.2395	84.3892	37.4643	47.0874	36.0657	105.325	85.033	38.0529	30.6687	69.076	38.8531	91.3891	51.8011	94.2328	52.4808	27.4367	64.3359	50.1084	23.7741	109.872	66.1959	26.9825	32.2293	80.3851	50.638	79.8397	27.0869	19.8894	68.4395	50.1237	51.9057	84.052	97.1948	66.1058	78.7105	567.065	54.2318	97.8593	40.3883	44.2319	169.513	296.418	122.789	108.441	71.2091	47.0531	54.037	80.344
IBTK	2476.33	2985.6	3122.91	3674.6	3029.59	1916.96	3742.6	2818.54	3205.38	3319.16	2232.67	3519.01	3489.95	3191.4	3428.4	2681.55	3467.93	3161.03	3705.66	3174.23	2817.82	2856.18	3233.94	3271.11	3517.63	3572.33	3612.29	3087.52	3326.07	4129.62	2764.03	3255.79	3032.73	3268.62	2433.04	4069.56	3608.21	3244.72	2637.97	2274.64	3295.59	3609.13	6300.72	5738.63	3307.25	3948.45	4174.68	2968.42	3732.83
ZNF195	738.244	651.968	659.563	661.623	620.146	692.268	662.375	774.035	1037.45	782.345	591.083	831.66	803.262	810.213	667.261	614.932	635.533	625.05	738.272	600.404	1016.25	762.361	707.55	758.382	654.67	1178.6	769.113	807.603	679.701	619.667	704.697	957.537	847.799	634.584	792.285	750.729	551.461	1224.04	664.393	764.652	700.326	1086.35	1692.83	1420.15	796.685	751.75	709.535	833.709	1215.65
MYCBP2	5557.82	6350.67	5526.12	6055.92	6443.9	4572.25	7360.29	6490.74	6575.56	5605.74	3474.01	6105.31	7312.37	5509.61	7649.01	5342.31	4512.16	6457.72	6279.38	5145.03	3633.08	4781.29	4772.96	4668.65	2870.3	5884.4	3957.99	6075.58	5614.45	4736.34	4095.45	4222.89	6688.09	3846.96	4724.64	4767.49	4831.41	4954.19	5702.35	6566.99	7107.14	5480.81	5628.99	5490.18	4362.82	6903.56	7123.66	3757.32	4660.26
FBXL3	4636.18	4282.46	4989.5	3889.2	4394.11	5020.2	3695.65	3897.32	4966.53	4237.33	3592.42	4044.62	3913.62	4173.08	3247.3	4362.97	3842.67	4559.87	3223.03	4228.62	4081.76	3642.03	4417.19	4101.21	4083.55	3170.17	4422.38	3898.74	3685.86	3710.7	4135.39	4631.22	4233.29	3334.18	3671.83	2471.1	3440.56	2320.5	4274.7	3820.11	3937.98	3320.98	2733.65	3465.62	2625.68	3445.87	3129.34	2094.58	2692.68
ITGAL	4495.59	5473.33	4626.03	5626.71	5282.75	5105.77	3438.99	4707.53	5226.43	5521.09	3490.45	6007.19	3913.59	5092.55	5390.96	6856.38	5945.32	4949.33	3253.71	4070.19	3378.73	4562.4	4552.1	4787.89	2431.77	3106.41	5868.14	6697.81	6160.05	4418.84	5522.53	5459.48	3659.95	5256.39	5440.82	3522.33	2447.64	3681.61	4808.27	4539.3	7224.1	3096.47	2180.08	2093.06	4141.51	4746.54	2640.81	1187.44	3383.65
PDK2	1228.88	1223.83	910.837	915.596	1076.99	1289.92	668.126	979.299	1057.54	666.973	1720.47	838.455	939.401	866.003	565.598	1177.39	1040.93	895.436	1002.08	1000.73	960.749	776.253	973.381	1008.49	701.661	1034.67	852.124	1062.64	848.268	550.066	1159.66	675.089	1113.46	1318.18	989.971	921.619	1214.92	929.913	1065.07	985.571	954.243	851.505	1333.12	1046.06	1086.56	831.556	645.312	929.01	668.76
ITGA3	26536.1	34164.5	21629.8	24332.4	23648.7	28920.3	22796	20048.2	28265.2	24131.8	45512.4	16458.3	14451.1	28470	23451.2	22475.3	24003.7	25863	12355.3	25729.5	21502.8	19461.5	18843	30599.2	14667.8	15828.2	21788.3	19283.9	22957.2	21345.8	22228.4	23502	16770.6	25854.9	20167.5	11035.5	11182.4	10086.3	17455.2	24671	23141.1	17017	19439.2	17341.4	17878.3	15634.2	23282.6	13036.8	14405.7
ZFX	2633.68	2721.07	2317.94	2438.48	2975.49	2655.32	2772.02	2510.19	2998.3	3193.59	2409.21	2828.22	2754.37	2814.22	2734.67	2678.58	2476.32	2771.56	2647.34	2659.81	2507.93	2309.5	2301.54	2511.82	2181.17	3105.67	2386.14	2766.47	2635.48	2521.01	2381.51	2786.18	3373.76	2189.24	2336.76	3097.05	2034.38	1643.76	2434.01	2682.76	2866.05	2974.37	1880.49	3314.29	2054.74	2477.36	2043.4	1732.85	2304.72
LAMP2	7543.54	10001.6	11799.8	11172.8	9658.84	8320.54	11271.4	11482.2	10718	8963.03	6532.38	10756.2	11843.6	10282.4	13510.2	11020.3	12689.4	13041.5	10640.5	10032.9	9736.24	8463.88	10699.2	9369.59	7907.12	10387.6	14537.4	12268.7	10670.6	15629.8	10027.4	9970.7	8746.81	13645.7	9059.79	14754.7	6686.33	8103.72	7817.06	8844.97	12133.9	7320.59	7525.04	8789.22	9627.4	8009.1	11119.4	9261.18	11649.3
ITGA2B	129.394	154.092	255.832	110.569	109.202	238.553	80.274	145.581	134.18	79.9741	104.202	119.497	50.84	106.805	294.377	167.35	77.8351	201.739	98.1703	115.798	83.344	220.987	107.931	146.117	121.126	39.9459	140.797	127.502	261.083	210.011	95.6088	120.333	87.2707	155.644	49.3392	23.9781	46.1349	28.5277	94.7697	215.98	173.383	48.9617	233.206	43.7603	39.8877	34.5546	93.4409	224.92	411.292
ASB4	63.334	46.3199	8.91722	30.9092	28.0524	25.9338	29.8366	34.3417	49.6488	34.4052	56.9962	26.2222	74.7112	18.2462	45.5415	33.6658	52.5779	19.0662	5.12507	20.375	59.9395	66.1663	19.987	25.9599	159.62	27.7276	37.8322	55.1887	36.2354	26.0292	25.042	33.4683	60.8124	36.3602	39.3047	39.3463	153.252	5.68444	80.3392	20.9946	42.6514	92.943	46.6598	17.1066	52.028	45.3217	20.2207	43.6839	95.174
GDE1	3721.95	3926.16	5395.1	6085.92	4909.06	4469.82	4162.06	4316.88	5877.22	3509.84	4422.53	4762.61	4409.55	5074.2	4208.99	5950.31	7873.74	5725.69	7190.45	4840.98	4964.76	5190.22	4779.96	5517.6	4585.77	9024.49	5561.34	5497.68	5434.1	5852.8	5525.31	4400.32	3596.1	5944.87	3998.42	7066.75	4021.52	7258.52	3776.18	4900.91	4942.96	4524.27	14301.6	13786.4	8030.76	7873.19	6303.4	10851.5	10008.7
C19orf60	4298.27	2687.22	2902.16	2322.27	2784.14	3334.04	2645.97	2627.75	2241.87	2241.91	3770.02	2514.41	1973.11	2285.47	1874.68	2832.07	2666.97	3095.85	2497.03	2331.9	2609	2526.25	3097.03	2504.64	2789.88	1991.65	2985.03	1908.2	2402.55	3040.29	2770.54	2584.71	2106.58	3464.08	4272.43	2787.91	3193.77	3886.27	2948	2152.4	2845.07	2498.68	2497.29	1433.44	2891.21	2752.39	1641.83	2564.21	2830.33
CRLF1	101.44	15.0822	86.993	71.1895	568.046	177.882	305.938	163.638	58.1386	57.6366	118.475	92.284	311.162	149.847	50.8719	106.94	318.83	255.594	184.062	77.4234	132.218	999.161	210.866	187.33	282.952	662.316	71.4753	81.3424	285.49	126.364	621.256	557.265	310.583	182.725	76.1324	49.9011	1219.73	742.389	125.682	37.0184	66.7951	107.442	9218.77	130.375	178.201	289.088	113.694	167.736	115.426
OSBPL7	914.199	816.752	776.224	825.629	904.671	975.901	664.682	854.509	1089.23	577.666	1053.81	947.275	479.88	904.304	542.296	880.316	689.227	813.714	932.552	646.387	715.305	1075.19	926.41	834.574	361.287	3818.98	682.966	842.864	984.231	399.008	860.682	460.728	647.608	1489.07	780.559	648.964	1377.82	679.578	648.942	1107	1074.36	1430.46	1037.69	1198.36	919.491	1298.52	1090	876.19	1264.61
TMEM98	4529.12	3773.86	3885.68	3193.82	3623.69	4339.23	3452.73	3703.8	3587.83	3201	6037.75	2863.19	3715.83	3509.56	2862.84	3314.31	3973.06	3469.64	4247.61	3729.52	3959.59	5141.09	5045.79	3612.64	4415.57	15160.2	3204.64	3552.35	3294.33	2270.86	4741.69	3952.85	4163.61	4847.9	4336.82	3246.8	7049.88	2222.46	3646.39	3712.98	3393.88	5887.65	3456.2	9663.99	6833.53	4943.94	1921.42	3427.77	2935.61
YBX2	8.36182	2.61779	26.1408	8.41934	6.01179	5.6767	14.8674	9.93295	6.35895	8.35532	9.88351	6.79148	4.45717	19.2515	22.1949	11.8827	6.60696	4.288	12.2701	7.62252	11.1141	19.1823	10.993	4.43618	17.7311	10.6064	0.0195905	11.7549	12.6923	28.0927	1.82103	18.1141	8.80745	2.42754	22.5251	21.0985	23.7116	95.1862	26.7971	6.6585	13.5915	21.4264	326.424	3.78202	42.0914	47.485	84.5303	109.05	114.569
MAP3K14	2076.96	1469.61	1965.27	1856.5	1184.19	1489.22	3099.7	1896.2	1255.13	4684.86	2206.33	1745.89	2913.43	3010.46	4451.46	1698.25	1840.81	2113.43	2153.46	3142.78	1467.25	1240.73	1170.26	2315.51	2523.63	1739.94	2195.96	1331.2	1580.54	2823.09	1826.28	2355.37	1412.7	1470.44	2455.75	1294.1	1473.55	1199.27	1412.21	1626.32	1752.16	2445.41	1409.85	3610.35	1893.17	2549.59	2285.69	1496.29	2021.14
ABCC8	24.1776	28.4663	10.7127	125.7	29.0542	43.9042	107.507	66.9586	48.5953	39.9927	8.82596	25.2499	10.5181	33.4439	130.153	19.8002	24.1436	148.122	25.5718	54.5348	25.5871	55.5082	0	15.1866	12.5529	31.0042	25.236	5.37333	57.1183	18.9679	44.5643	31.6615	49.3287	9.45701	14.159	11.4996	18.9659	274.485	33.9949	47.2484	41.117	8.52514	66.3184	17.1115	11.1203	3.27766	6.39895	0.063631	30.4691
TMEM132A	1487.66	2073.56	1295.81	1262.34	1288.38	1833.61	2262.02	1477.54	1049.11	1536.78	2048.4	1385.45	2829.09	1623.61	1872.53	1339.78	1243.66	1004.95	1483.7	1079.04	2250.21	1431.83	1280.19	1711.31	1210.14	3579.89	1161.04	1241.68	1278.75	986.748	962.793	1420.02	2109.27	1022.11	2427.21	1526.43	1222.1	2503.26	1395.73	2010.76	1795.64	485.898	3977.61	2508.07	1303.47	574.895	3656.13	4866.45	2546.74
AP2B1	12247.7	11480.2	11213.8	10652.7	10592.6	10167.6	11200.3	9954.91	8312.44	11108.2	14324.6	10812.5	10981	11092.6	10938.7	11214.4	11559.8	11334.9	11299	10765.3	10071.7	8986	9954.67	11181.3	7828.81	9424.81	10172.9	11383.3	11269.7	11613.6	11398.8	10449.5	10963.5	13571.9	11157.1	10387.5	9773.81	8207.47	9372.43	10278.3	11837.3	8843.91	6405.46	10052.3	10760.4	9748.74	9699.39	12780.7	10474.3
TAC1	0	0	14.337	13.104	1.00276	0.0510673	9.22557	0	0.0230779	19.5374	16.4598	60.3036	90.0132	7.8848	97.1631	0	0.0389951	56.7875	21.4705	6.74331	2.2788	0.0276485	0	10.7211	15.6684	0	25.2011	0	30.8712	56.2758	0	7.76344	0.179496	0.0532152	2.45941	0	4.73284	69.134	6.17572	0	0	0	0.0117513	3.79886	2.24922	0.0249537	5.70613	0.0464509	1.81845
ZNF263	1766.95	1838.38	1962.58	1625.96	1777.28	2057.62	2099.35	1787.69	1938.65	2504.27	2254.57	1862.49	2280.51	1815.78	3039.67	1873.52	1758.63	2076.06	1815	2033.83	1841.52	1766.03	1728.9	1755.22	2028.72	1451.43	1760.98	1616.09	1674.8	2423.01	1850.43	1673.33	1984.55	1540.68	1842.61	2266.63	2263.37	1817.96	1561.56	1997.31	1601.43	1955.09	2663.14	3897.8	1968.41	2255.17	2531.99	3045.25	2540.3
CX3CL1	10053.4	19411	13801	6726.9	8093.95	10360.1	11992.2	10846.5	8455.06	21798.8	8714.56	14561.8	7203.45	12419.6	29374.8	7941.67	5480.79	6200.32	3973.58	14759.8	16538	8723.34	8039.88	13031.6	16013.6	3659.67	7560.83	7722.4	7185.92	18624.1	8090.64	16446.6	8469.55	7945.52	7606.69	5515.35	6466.67	2349.05	8715.24	11791.8	11011.3	5317.35	834.522	8805.42	6289.18	6357.87	15256.9	3696.48	6573.33
SPATA20	2472.62	2425.35	1502.19	2788.98	2504.63	2874.81	3094.01	3163.08	2255.61	1381.4	3727.26	2650.43	3147.67	2435.4	2706.08	2390.42	3513.93	2800.24	3404.01	2512.46	2904.43	2654.37	2426.46	2756.55	2729.33	4080.74	3028.11	2080.03	2490.46	2945.88	2622.91	2412.84	2392.54	3890.24	2945.64	4420.93	2060.38	6435.24	2329.98	2905.3	2901.45	4219.85	3981.76	2273.91	3676.8	3218.31	4987.53	4987.09	5113.84
CACNA1G	10.2043	14.1991	38.5935	11.2136	16.0304	5.69685	109.684	19.8573	4.25673	60.5138	23.0586	25.2531	95.5079	29.4711	107.903	1.9754	0.0410179	38.2586	38.8549	28.93	2.2791	13.9129	13.9908	18.7839	55.3153	109.103	6.33198	0	14.4564	130.479	10.1755	17.0004	17.6094	16.4853	23.3643	34.5423	107.384	107.571	50.4824	145.99	12.7856	42.951	85.0034	169.483	141.544	342.667	255.69	67.7731	171.908
TNFRSF12A	2703.47	2999.81	3585.93	3832.02	1635.02	2861.36	12214.4	2844.73	1148.43	21234.3	6639.8	2643.61	6209.33	5940.23	8628.7	3480.66	3598.35	3208.8	3668.86	6250.53	6949.52	3321.72	2095.67	7187.68	20112.7	2300.54	7175.2	1882.85	2810.35	22641.2	4933.86	10511.8	2559.64	1662.49	3815.84	10093.7	2983.69	1766.54	1604.83	3336.1	1712.59	1706.44	9140.11	14988.6	7583.72	3725.23	10016.5	14953.1	9416.63
DLX6	0	0	0	0	8.61e-05	0.00540317	0.00620057	1.88443	0.00253724	0	0.0042296	0	0	0	0.00265148	0	0.00419375	0	0.00103486	0	0.00480482	0.00302037	0	1.87457	0.00199762	0.856598	0.00228577	0	0	0.00750386	1.91456	0.0256215	0.0162573	0.0673571	0	0	7.15599	120.316	2.07548	0	3.93248	0	8.30609	0	4.47733	2.19713	0	18.3452	5.50746
MAP3K9	404.006	837.254	436.089	1004.65	842.556	640.499	919.022	764.086	932.869	1174.95	639.328	564.471	618.367	1027.97	787.995	636.718	677.167	870.248	959.134	679.622	554.263	678.018	620.605	938.587	606.643	1072.32	391.933	983.07	842.849	749.47	761.337	782.094	670.785	691.952	440.469	2592.12	368.475	770	545.941	993.145	711.599	2215.83	1902.23	1235.48	1121.97	1955.31	1475.3	2810.87	1207.32
RALA	9501.38	10264.4	11406.8	7294.84	8388.49	11641	6151.4	6709.54	9106.9	9383.53	8535.79	8213.61	7557.22	8216.98	6558.14	10595.5	6509.64	5212.72	5797.77	9516.78	13919	6253.69	8022.89	8048.25	6486.07	3305.8	8723.94	6303.45	5129.55	7548.83	6305.2	9537.88	5801.27	5942.47	6158.56	4298.03	3164.32	4694.33	7504.93	8941.22	7211.9	2597.56	4411.98	4279.43	4969.16	3232.35	4801.33	4354.43	4797.89
BAIAP2L1	922.554	1082.16	970.939	1664.39	1518.8	1093	1548.16	1082.36	1361.82	2158.22	1563.73	1194.05	873.151	1362.02	1403.35	1511.09	1650.14	1489.22	1181.03	1406.12	996.32	1311.18	1141.27	1535.6	3158.41	3675.55	1033.9	1487.68	1800.8	1724.32	1737.17	1604.78	1395.18	2198.61	783.025	2637.19	3564.47	622.458	1594.53	1257.84	1072.65	2642.33	2282.71	2438.59	2115.59	1911.16	1678.41	3522.99	1768.01
KDM7A	2390.69	4074.08	2933.56	2653.09	3211.93	2500	2578.37	2962.33	3060.64	4527.6	1822.55	2720.38	3166.67	3530.37	4707.79	2635.01	1933.96	3028.02	2438.75	2871.88	2412.42	2023.36	2135.64	2514.5	3250.34	3274.84	2025.76	2402.9	2185.03	3387.27	1959.04	2895.28	3286.7	1423.64	1742.9	3912.13	2492.45	1972.15	3137.53	3450.04	2206.72	3834.57	2757.48	2838.37	2266.06	3146.02	1927.97	2534.33	3121.33
ETV1	4598.01	4640.53	4066.07	3684.9	4729.73	4141.12	3406.89	3513.91	5624.71	2590.75	4328.21	4363.3	3785.82	2984.82	3410.41	3144.98	4089.2	3535.72	4093.21	5063.31	3165.47	4996.95	3872.54	4100.32	1990.11	6583.27	3397.96	3903.26	3384.97	2930.59	5020.23	4137.66	4311.66	4013.14	3148.35	2833.03	1735.7	1119.31	2807.92	3611.86	3857.4	2897.78	3473.81	4909.58	2880.16	4066	2835.91	2920.18	2571.67
AGK	1224.2	1336.04	1291.34	1379.5	1325.45	1193.16	1094.39	1147.48	1334.34	1065.13	1126.21	1481.64	1277.91	1236.84	1122.69	1304.14	1312.66	1218.85	1162.62	1129.32	1255.08	1259.92	1086.31	1321.35	1040.99	1417.99	1166.28	1215.47	1099.31	899.397	1480.91	1344.09	1382.04	942.465	1213.6	1919.11	1154.75	1159.3	1157.78	1158.4	1161.37	1420.95	1020.07	1087.94	1113.13	1308.25	1066.38	1762.62	1298.77
ALDH3B1	10387.6	10335.6	7357.67	10828.9	10169.8	10276.8	6170.9	7724.1	10574.4	7423.45	16552.8	7440.23	5358.81	9624.48	7362.02	12997.8	12641.2	10339.5	5546.23	10036.3	8807.72	9129.07	9690.83	11929	20150.4	7657.84	9115.85	12347.4	11886	8364.39	10836.1	9671.17	8807.76	12595.4	8925.89	7497.82	17752.5	2154.88	14695.7	8108.18	6842.72	7618.28	5016.35	7143.52	7928.92	5828.31	4711.9	2674.49	6397.82
TTC22	564.155	754.443	366.995	551.043	655.21	630.339	349.565	523.548	550.435	535.82	803.765	437.196	288.185	426.581	290.228	656.525	685.905	466.823	551.148	510.988	452.075	548.819	770.51	346.883	761.152	1531.88	438.154	552.561	487.564	420.218	560.788	576.884	615.54	1441.06	433.777	1535.11	1896.02	512.055	940.437	601.921	524.608	1376.28	1249.15	1217.41	698.211	843.413	611.179	854.366	668.765
PHTF2	1105.03	1311.97	1794.79	1670.96	1447.67	1070.49	1757.85	1462.17	1356.54	1505.15	647.031	1854.72	1729.78	1433.8	2106.59	1142.73	1457.31	1584.86	1367.13	1387.38	1290.63	1510.84	1466.07	1437.88	1496.22	1856.88	1787.23	1422.57	1808.96	2064.19	1103.93	1353.46	1309.55	984.633	1299	1715.56	977.692	1850.32	1266.97	1236.78	1411.21	1883.7	1501.07	1743.75	1616.57	2165.66	1597.98	2221.97	2152.32
CCL26	7.40913	8.84594	5.32764	5.58818	16.0306	20.3208	29.8458	8.98912	12.7084	7.40314	11.0189	9.69985	2.91518	14.2461	40.2581	0	2.24074	24.2862	18.4168	1.62809	8.94695	8.5795	9.99329	17.8768	16.7285	1117.46	6.3323	0	9.01061	11.9007	12.9598	26.224	29.1983	7.11416	3.26218	40.3363	16.5938	7.58919	8.25592	3.28738	16.0477	11.1155	47.6623	3.78121	4.48345	6.51299	19.4547	558.022	222.316
FARP2	1532.35	1880.26	1967.98	1580.98	1744.22	1534.23	2076.42	1936.91	1731.58	1991.69	1535.23	1845	1866.68	1706.54	2215.69	1700.23	1595.37	1950.01	1645.26	1889.04	1491.67	1600.53	1632.96	1634.2	1557.83	2462.51	1380.63	1930.84	1915.89	1460	1460.46	1429.32	1775.5	1771.28	1510.92	1835.57	2037.86	2207.26	1603.79	1759.55	1813.43	2441.97	1497.96	1863.69	1650.86	2050.26	1553.28	1724.78	1572.19
USH1C	1.82619	0	3.53383	44.0619	2.00466	13.567	111.945	46.1462	0.0241952	0	0.0413041	0	1.39888	3.87636	25.4334	0	2.24136	36.5185	0.00966573	0.77931	6.72438	6.44335	7.99457	0	71.9956	611.978	4.23041	1.75933	10.8273	5.99952	0	4.14697	23.3581	1324.85	0	0	1970.3	70.4115	19.588	14.245	17.6214	9.38562	10.3865	15.2023	8.90913	0.0351796	3.1576	1.21846	34.1352
GGCT	411.467	362.478	510.606	405.774	463.857	482.903	464.126	465.675	452.186	528.383	469.352	478.006	482.993	473.659	379.185	472.34	527.043	357.27	713.723	444.552	601.981	566.962	499.682	512.756	704.768	985.785	586.287	434.079	438.624	587.751	532.937	571.265	502.346	525.735	467.268	2004.55	619.953	1753.24	454.268	775.588	413.356	946.963	2938.86	1779.93	1140.8	817.549	1384.22	2193.22	2176.36
DBF4	188.966	222.656	238.695	217.41	217.402	191.387	267.003	261.327	271.516	274.428	106.416	230.257	298.209	245.6	347.376	241.616	230.112	242.543	296.533	203.52	283.218	183.668	197.874	251.894	275.646	325.315	281.584	217.937	191.202	274.992	258.111	325.21	207.693	352.436	272.973	335.035	192.547	638.674	181.305	217.444	233.64	318.199	479.972	258.877	266.706	323.584	486.861	434.092	388.874
TBXA2R	650.763	512.154	472.023	409.528	446.825	509.897	393.083	462.067	464.857	440.005	833.332	510.072	476.17	461.714	383.417	469.37	272.87	285.106	415.152	392.6	526.456	493.29	501.681	567.463	231.814	129.028	522.194	372.579	359.773	362.378	595.162	543.466	409.463	354.704	415.476	167.988	272.766	197.961	418.191	341.467	482.88	66.151	58.0733	119.907	299.86	148.871	455.263	382.36	262.329
IFRD1	2274.32	1890.02	2475.89	1906.16	1797.32	2035.13	2867.12	1737.94	2200.67	2574.95	2028.7	2275.4	3429.91	2403.51	9367.83	1980.46	1321.47	2860.24	1682.08	3359.09	2306.9	1892.03	2286.54	2236.6	4293.39	1426.07	2567.91	1758.97	1663	4371.5	2015.68	2730.7	2293.82	755.187	2206.98	1677.16	1229.16	1368.69	1603.79	1453.48	1998.82	940.07	2285.8	1453.44	1188.38	1472.19	2565.33	2529.69	1565.72
COX10	638.627	655.537	681.108	654.128	652.205	783.421	784.959	678.179	692.003	699.549	661.251	621.796	670.122	619.588	530.64	770.401	853.548	605.928	839.498	709.446	655.317	759.154	711.547	629.285	598.288	913.753	720.781	677.365	657.953	763.615	700.059	654.591	717.184	869.824	712.736	691.213	822.946	1076.51	598.467	681.201	701.166	900.576	976.516	887.111	785.599	685.951	655.911	1009.34	708.497
GTF2IRD1	835.987	905.821	800.448	923.093	1018.88	885.875	1089.78	991.054	1324.82	1199.11	1360.83	704.375	911.247	946.558	1172.45	814.96	713.337	965.861	888.586	935.987	1227.29	1259.9	794.494	995.043	1095.28	891.62	1038.09	767.787	960.655	924.152	919.173	1255.19	839.196	896.808	993.301	916.814	1194.88	990.826	796.239	797.521	783.334	787.836	1822.41	1259.27	993.634	773.326	1152.56	1764.91	1396.7
PAF1	3646.57	2671.18	2929.07	2400.99	2610.82	2727.37	3391.95	2458.64	2512.33	2936.82	4034.3	2248.19	3032.77	3036.7	3712.24	2976.64	2791.89	2550.71	2519.53	3469.79	2626.78	2710.97	2503.41	3003.97	3915.43	2189.43	3379.04	2450.83	3337.86	4281.85	3734.3	4057.92	2836.75	3637.36	3665.15	2154.29	3517.28	3950.03	2924.32	2434	2602.44	2683.61	5595.8	2909.75	2919.98	2784.75	2228.71	3185.43	2236.35
VPS41	3434.29	4106.99	4276.96	4546.16	4271.89	3609.85	3917.95	4066.42	4080.15	3564.74	2991.5	4513.89	4061.96	3266.34	3924.08	3802.49	4787.15	4174.73	4268.06	3818.95	3989.57	3790.44	3640.68	3739.04	3082.25	4508.93	5016.02	4089.57	4090.07	4141.47	3486.38	3952.81	3793.44	4124.41	3570.46	5646.88	3176.12	4522.06	3602.09	3576.41	3904.09	3253.86	8671.53	6236.42	4465.72	3999.16	3698.31	6509.74	5175.72
ARHGAP44	6834.2	5713.83	4693.35	6014.7	4809.88	3759.56	4294.97	2738.95	4762.63	4894.09	8824.11	3675.42	2287.23	4068.59	3622.23	4224.33	4379.57	4081.69	5810.03	3911.78	3346.51	3964.48	4722.99	5275.57	3233.65	3260.88	3479.92	4377.15	5862.8	3918.43	4296.94	3579.48	3047.34	4365.44	4591.59	2612.23	2458.22	1948.35	3446.54	3724.05	3823.61	2114.19	2317.95	4368.94	3383.56	3336.92	1803.6	4727.49	2861.75
ELAC2	1937.31	2352.31	2312.56	2320.4	2141.96	2803.89	2115.42	2159.34	2369.7	2097.72	2714.04	2329.81	2224.92	2511.98	1985.88	2999.42	2954.03	2547.26	3026.7	2531.21	2650.09	2132.26	2359.5	2577.27	2068.41	2712.55	2256.9	2619.96	2558.45	2487.96	3219.01	2316.66	2518.79	2906.85	2093.01	2204.21	2693.17	4343.15	1920.02	2544.47	2496.88	2527.07	2063.98	2160.65	2752.9	2464.42	2110.04	3070.58	2576.3
SCIN	389.108	1113.39	483.652	803.138	865.598	467.18	240.727	1320.25	1332.2	418.585	333.41	479.941	447.931	526.246	588.894	594.137	808.645	1246.73	1503.11	569.73	532.057	696.172	630.599	719.823	1101.53	3272.13	535.874	1528.46	1142.85	515.833	869.042	693.487	509.733	1964.42	274.625	1569.64	2122.85	18735.1	895.126	810.152	423.027	454.936	10447.1	116.097	1168.46	125.152	1254.95	923.305	3282.12
ARSD	3931.42	5109.02	3760.93	5547.04	4745.76	3968.93	4252.59	5154.23	5981.81	5725.74	6036.68	4450.73	4608.85	4606.87	4314.9	6193.91	6224.73	4789.36	4807.96	5837.48	5414.57	5576.73	4887.89	4440.05	4577.42	9843.43	4936.18	6651.67	5448.6	4181.63	6306.16	5557.52	4590.47	8239.39	4552.05	18059.1	7097.16	3344.65	4209.83	5358.73	4942.16	10122.1	4755.12	10589.2	7132.31	7103.13	6804.12	4012.27	5729.94
PNPLA4	876.016	1094.66	1162.12	1193.94	1005.86	1086.22	814.799	872.581	882.178	922.803	1584.53	997.792	756.027	845.25	786.95	1197.19	1163.65	1078.01	1458.13	919.792	1008.51	1043.18	1246.21	1169.85	1631.94	1123.75	1309.16	1267.03	1248.87	1077.57	1225.58	839.584	788.43	1532.44	802.313	2799.48	1857.18	616.752	1208.25	901.224	1004.99	964.171	569.138	1494.38	1567.86	1320.11	1528.93	664.942	1242.42
MYH13	1.82895	14.3066	7.16205	5.60497	6.01157	6.77837	4.63469	5.39666	6.3519	0	38.07	15.5631	0.646825	3.10058	7.42247	5.93884	6.59448	3.4222	2.05565	1.63168	2.27243	10.6676	29.9824	8.96319	4.19313	1.5458	0.0186723	9.04327	3.58635	2.44237	21.4462	4.01456	28.1299	4.7115	1.60468	1.9035	2.42918	9.53978	0.0101644	1.61832	14.7466	0.797502	16.5317	0	4.44679	0.0263209	0	13.6262	13.9399
ADIPOR2	5528.02	5487.55	6715.17	5981.88	7336.55	5832.93	9550.14	5491.51	7740.86	5411.3	5702.24	6651.33	5164.89	5979.3	7051.68	6726.65	5534.46	8645.95	4616.75	7103.94	6125.42	8160.62	7929.95	5446.76	5327.1	3957.19	7939.06	5251.67	8734.83	7532.27	5689.64	6690.85	3885.02	6293.62	5063.04	2250.29	4193.83	4300.29	5894.97	4599.98	5654.76	2390.27	2787.56	3311.42	4401.53	4557.81	3826.75	3887.06	3012.29
CDKL3	101.464	129.158	107.676	110.579	109.202	155.299	74.5352	103.071	102.487	128.38	133.773	100.066	99.6077	110.031	88.9812	89.1186	72.3508	100.827	112.48	139.699	135.49	93.974	121.922	81.5457	199.397	69.4005	160.74	99.4649	87.8864	103.885	145.784	70.5636	103.137	42.2336	113.894	137.288	165.237	121.831	163.768	88.4848	79.7292	125.581	142.016	102.79	112.869	73.3674	103.199	93.0477	97.9013
UPP2	7.45731	5.33147	0	3.73088	1.00267	4.5279	7.99188	3.58865	8.43701	1.83092	9.82599	8.75282	5.296	5.56411	4.25018	2.9673	5.48807	0	5.11584	8.55919	2.26504	3.22523	7.99504	7.18246	9.37989	4.87315	4.21469	0.861499	11.8512	0.0597887	10.2498	3.91515	19.4921	3.59177	5.80028	22.1121	7.14056	1.87949	15.4432	6.69156	0.711881	12.042	3.12761	12.375	11.072	10.792	12.1945	9.21471	25.0201
PRSS21	985.892	229.738	373.265	343.906	459.85	747.425	558.118	81.3286	123.641	1602.9	149.191	476.055	299.577	742.398	1162.91	3010.34	2454.2	452.888	53.1841	2444.64	463.2	923.581	1634.96	311.011	509.546	217.293	2873.53	677.353	899.944	531.173	482.774	604.811	199.145	1282.76	1964.68	989.835	157.127	24.721	422.324	342.26	860.948	289.818	73.6231	339.792	158.281	269.659	2766.36	600.528	2124.92
MARK4	2547.11	2155.48	2264.12	1633.45	2185.03	1883.16	2258.63	1903.44	1893.23	2126.57	2943.2	1699.26	2405.25	2054.23	2316.31	1893.32	1994.21	2558.58	1985.76	1807.25	1747.12	2079.94	1874.81	2046.57	1728.02	1688.45	1915.43	1990.51	2135.21	2281.4	1834.64	2118.78	2164.56	2566.15	2488.4	1789.48	2057.96	2477.58	1948.86	2020.07	1929.48	1672.08	1999.7	1997.89	1924.16	1935.95	1982.46	2252.98	1583.27
PROM1	63.2656	8.85101	26.8645	120.861	50.0936	65.3574	21.8527	35.2115	11.6508	61.357	23.0814	80.6238	63.7588	257.528	61.4634	135.657	63.6062	10.3648	64.4326	90.1963	209.958	28.8665	446.716	10.7036	4675.88	2133.44	21.0417	317.425	151.306	108.679	263.668	316.23	603.579	1862.48	76.9654	1730.95	6466.83	8072.68	2200.16	139.866	49.8668	794.726	40.4485	1653.35	357.447	227.612	35.667	3557.13	158.839
CCDC124	4806.56	2868.01	3354.43	2912.68	3207.92	3782.05	2862.57	2985.82	2709.9	3217.76	7360.16	3069.17	2765.73	3264.76	2647.84	4152.05	3985.1	3201.88	3127.94	3942.47	3514.2	3189.31	3513.76	3765.95	4101.29	2480.38	4610.45	3527.95	3491.92	3709.5	3374.97	3860.3	2906.48	4452.13	4877.15	2092.84	2931.69	3357.04	3092.21	2872.43	3003.03	2408.35	4085.42	3000.17	4078.43	3407.04	2471.75	3667.71	2973.51
CEACAM21	231.783	75.6464	533.98	537.95	109.203	114.881	153.628	534.445	286.323	437.227	199.62	268.143	461.759	566.277	495.659	69.3107	879.732	799.093	163.616	465.896	540.864	361.966	63.9589	190.896	59.5401	230.403	563.153	547.18	465.846	654.916	366.738	423.34	335.425	280.987	355.142	69.0993	199.597	285.539	75.2105	106.149	274.811	233.063	111.977	183.686	294.328	128.382	292.602	153.939	301.135
PAFAH1B1	9135.49	10439.8	9681.04	10279.7	9559.65	9424.74	10852	9219.75	10089.4	12083.1	9352.76	9685.52	10265.2	10112.5	10166.6	9433.95	9058.26	10058.6	9104.65	10936.5	8443.42	8914.45	8463.61	10376.3	8990.9	7973.32	8875.24	9385.57	9042.02	10363.7	8663.52	10728.6	9092.28	8295.57	7708.86	7393.17	7155.01	8210.34	8539.11	9612.28	8953.58	7926.18	6459.36	10214.1	7504.07	8601.17	6863.47	7570.83	6734.05
NOS2	418.034	312.645	238.69	303.644	144.267	254.4	321.988	453.091	156.382	139.509	427.616	114.631	176.394	256.762	199.132	370.35	244.356	160.784	396.734	241.006	562.997	195.413	197.874	229.47	149.327	40.7589	241.668	414.248	251.031	198.33	304.542	281.029	151.163	142.812	182.651	26.8581	134.595	74.2232	198.784	172.886	380.031	37.7703	22.8271	54.2314	81.9143	50.7292	67.3865	168.76	103.444
DNAH9	119.124	19.5373	66.3478	206.145	87.162	202.671	116.967	91.2745	12.7068	178.574	97.6511	321.579	104.836	540.694	105.947	467.389	181.937	48.6107	48.0719	201.778	392.092	106.811	576.633	50.1418	6292.2	95.5167	12.6344	466.651	502.085	394.234	543.16	552.692	1643.58	332.55	194.225	72.9392	10235.3	207.47	4830.69	42.9116	130.457	1217.23	25.9356	96.1074	715.874	612.602	32.4118	39.124	29.5188
KIAA0100	6640.51	9040.55	7783.04	10941.3	9444.44	8536.64	9656.78	9600.45	8964.28	9724.92	7670.61	10176.2	11387.2	10180.3	8909.39	9981.55	11887.4	9507.46	12124.2	9153.93	9185.34	9311.64	9968.66	9565.03	8209.91	7656.21	9055.96	11162.7	10009.9	11488.4	8807.43	7487.86	8366.43	12601.4	8719.77	8802.48	7512.78	10241.5	7657.4	8973.15	9874.78	9155.31	7998.78	8794.94	8680.25	10927.5	9543.36	11846	6618.57
SLC13A2	126.674	220.283	25.0759	86.2355	60.1112	140.557	13.8325	77.7793	262.875	62.3219	19.7899	0.957855	19.6494	65.3842	25.4483	41.5865	30.7229	12.0977	0.00992922	47.6549	46.6794	43.7979	7.99456	32.2268	234.801	17.0627	22.0909	38.8528	153.291	2.45255	27.82	51.9477	17.6653	7.11276	147.362	5.73971	73.2973	55.1784	207.041	180.399	53.0857	100.573	29.0471	997.732	68.6577	433.479	11.2785	25.3473	1143.07
GAS7	3563.7	3984.96	4869.25	2976.4	3741.91	3009.92	6077.97	5880.39	2473.25	4593.62	5208.75	3935.8	6245.19	4453.79	5469.33	2883.56	3071.31	7029.83	4063.55	3456.97	2832.27	3754.14	2868.17	3644.91	3657.55	2235.18	5273.44	4787.75	4199.73	4541.56	3537.45	3431.56	4037.32	5327.78	3413.03	3035.6	5877.37	2826.88	4320.02	3708.82	5231.66	2733.49	2107.52	2982.09	3365.88	3427.53	2393.71	3125.73	4169.77
TRAPPC6A	1678.52	1317.32	1231.2	1348.56	1440.66	1441.92	1167.74	1270.46	1226.59	1199.09	2477.12	1292.18	1230.71	1275.09	1247.67	1559.62	2018.27	1517.92	1295.55	1307.32	1268.42	1491.62	1410.1	1294.44	1808.41	1332.13	2009.97	1926.33	1720.14	1467.05	1401.05	1355.29	1010.56	1937.51	1791.52	1813.49	1361.39	2170.14	1367.91	1058.88	1352.37	1786.5	2543.92	1563.85	1674.1	1776.32	1041.15	1435.42	1968.49
MATK	1955.05	1531.12	1248.26	1061.79	971.795	2179.09	2389.14	940.398	1022.69	1187.93	1515.46	883.144	539.959	1552.69	886.508	1975.52	1174.61	1328.4	821.102	1103.77	1172.89	971.647	948.396	1142.05	930.321	982.325	1300.76	831.087	665.175	1251.06	997.158	1445.68	550.425	1292.35	1254.74	468.478	688.373	319.785	1060.94	1360.88	1812.89	455.818	214.607	286.477	918.358	698.891	296.584	467.42	920.053
CEACAM7	1.82739	1.72656	0	3.71947	4.00824	9.02842	3.50575	9.02453	0.0217317	1.82564	3.33531	1.92896	0.644854	6.30853	2.14747	3.95649	13.139	5.16299	11.2487	5.04885	15.5183	2.16889	3.99717	3.53699	23.971	162.123	10.5115	14.4896	4.49055	3.62387	5.543	5.85341	3.11475	42.2431	0	46.0584	44.9699	9.49285	3.10478	10.0345	3.12914	46.3673	296.477	55.179	23.2956	43.1857	10.4676	18.4549	57.2286
CD79B	473.879	289.455	427.175	402.048	345.638	329.815	435.426	318.285	532.441	186.953	239.085	318.67	252.475	230.398	625.9	411.938	230.131	216.427	302.674	180.494	354.31	395.053	253.838	337.054	244.337	504.332	285.8	262.243	235.605	204.251	395.533	414.018	322.335	387.578	883.634	662.412	975.216	1344.95	525.335	262.965	441.596	1446.87	664.498	493.033	343.056	999.768	353.49	155.107	673.394
SCN4A	5.55344	9.76358	29.7004	11.2306	2.00465	0.0500773	22.8599	20.8248	8.47249	5.54891	13.1733	7.76133	9.04576	6.28895	12.7197	3.95601	26.2382	6.89931	45.9699	0	6.71161	3.23779	17.9886	21.5483	8.36923	29.575	10.521	25.3763	9.03071	9.49982	32.5703	14.8443	37.1467	4.77605	6.61014	3.8184	16.6158	28.5406	8.25694	3.28774	1.51304	12.8292	212.339	7.58802	2.2682	16.2156	42.2658	10.4147	51.7455
ST7L	451.499	610.126	582.402	593.22	416.77	497.541	648.588	484.661	529.306	678.167	498.961	529.499	413.734	582.134	531.69	631.769	603.738	587.692	537.855	570.622	488.72	508.248	660.58	640.064	654.659	617.046	502.242	420.506	517.477	555.908	666.646	656.262	484.967	378.196	433.809	758.43	698.948	564.421	465.59	466.201	568.194	368.949	266.436	802.41	466.954	491.819	459.2	675.196	640.154
TKTL1	98.6847	74.7975	34.0489	44.0186	55.1024	675.516	28.7258	46.0757	21.1612	35.3151	51.5769	65.0869	20.4037	23.812	66.7407	191.126	124.88	173.992	23.5307	189.236	259.68	32.0667	56.9635	67.2062	72.0537	9.70474	11.5863	61.4677	5.38729	62.6067	32.4596	90.6244	26.3749	38.6257	55.3602	215.278	14.2543	58.0885	44.2864	279.497	99.4959	2.50611	4.16656	3.78114	13.3297	1.1172	3.15007	2.37409	14.7439
PAX6	219.718	228.042	176.78	186.494	158.293	250.967	121.515	153.707	203.897	188.843	278.483	206.946	152.092	159.463	154.642	210.921	158.892	153.857	91.0153	178.848	230.995	131.349	106.932	216.955	113.824	84.0957	187.024	120.251	147.707	133.414	172.69	227.221	111.943	107.733	126.465	84.4697	68.5539	65.6547	139.055	206.655	174.962	102.328	77.7617	119.927	134.986	92.7733	84.4743	37.9744	67.4014
RPUSD1	927.229	959.273	959.304	839.684	866.6	1149.23	775.828	1057.07	927.599	872.573	1218.28	787.933	928.757	712.072	693.746	1226.9	1052.98	865.877	953.003	837.185	1066.25	879.815	890.433	960.083	765.349	890.81	1217.75	903.457	1031.36	784.898	1138.31	741.584	839.179	1363.88	1051.93	1619.57	2060.23	1747.54	885.853	1033.6	971.944	1026.11	1898.09	1670.47	1497.05	1133.54	1037.93	2562.92	1689.53
RHBDF1	1842.36	2609.76	2169.89	1816.2	1859.43	2275.98	1718.93	2313.08	1981.97	2904.29	2618.62	2047.08	2509.48	2342.93	1531.52	2172.57	1582.23	2243.85	1613.56	2452.02	2730.03	2133.32	1698.92	2288.62	1683.13	2034.19	1723.15	1496.71	1774.49	1543.81	2216.25	2128.02	2000.54	1825.16	1834.21	2735.12	2171.31	1459.11	1728.43	2783.11	1744.88	2261.29	3618.92	4548.86	2695.35	2563.63	3587.9	4211.9	4153.19
LUC7L	2609.48	2229.4	1806.42	2070.17	2209.08	2176.94	2139.47	2522.87	2797.56	2612.17	1996.89	2423.08	1956.39	2234.45	2146.86	2175.54	1550.46	2188.2	2062.45	2365.13	2509.03	3338.76	2234.58	2488.52	2496.49	2059.51	2228.53	2013.12	2184.14	2102.03	2429.8	2118.85	2370.7	699	2694.44	2012.21	1943.45	2396.67	1930.32	2377.56	2197.07	2782.58	3885.33	6930.41	2133.28	2634.81	3055.47	3015.43	4427.56
CACNA2D2	6843.46	12067.2	6286.18	11334	14137.1	8559.16	8359.61	10146.6	17367.5	9638.41	11203.8	7947.39	7181.4	11185.1	10434.5	9497.32	14668.3	9599.6	13521	9396.66	7316.09	11781.3	9224.13	11991.7	4186.93	2585.76	7009.22	17840.6	18949.6	8281.78	10964.3	11841.5	7170.27	11935.1	6845.38	4465.08	1735.71	2031.14	5736.35	9670.54	10946.9	4163.04	12480.2	4396.51	5800.1	6099.01	3984.42	6832.43	3314.35
BAIAP3	601.396	557.563	232.372	331.728	551.018	532.432	403.415	420.449	315.913	617.691	597.642	440.111	524.824	660.303	621.709	627.808	486.516	413.781	194.294	568.062	573.121	388.675	631.598	571.92	2667.55	509.131	296.319	667.432	659.782	306.941	652.715	503.036	853.457	519.862	559.425	798.735	5871.65	1289.72	2091.99	418.948	438.358	1149.17	1535.25	768.119	887.399	1006.26	760.762	1597.21	734.355
TSR3	3263.96	2046.79	2246.15	2253.86	2484.59	3042.51	1906.87	2103.27	2006.28	2294.94	4385.17	1945.06	1855.2	2439.4	1798.42	2976.64	3157.82	2092.55	2157.55	2466.48	2638.98	2372.49	2831.2	2499.27	3259.73	1738.29	2822.17	2113.5	2321.9	2275.53	3226.44	2494.1	1855.45	3501.55	3085.55	2912.72	2585.75	2317.65	2502	2253.58	2268.76	1950.75	3424.05	4204.26	2855.81	2202.36	2174.25	4017.91	2963.35
PIGQ	3991.02	3862.94	3921.59	4011.04	3825.06	3755.04	3357.61	3305.03	3947.03	3569.39	6221.96	3072.08	2891.24	4065.43	3498.31	4280.78	5007.38	3997.37	3631.02	3685.24	3520.88	3857.7	3649.68	4203.42	4246.43	3331.19	3775.16	3868.9	4795.18	3701.25	3928.34	2888.07	3006.66	4576.25	4034.5	3912.11	5481.89	3298.98	3549.56	4474.37	3459.21	3388.07	6200.17	5875.69	3840.56	3904.24	6062.95	6546.44	4680.6
CRAMP1	913.268	1018.96	693.657	983.082	901.665	907.247	874.358	1017.29	1029.01	870.717	1168.93	895.781	1003.34	873.199	699.039	881.307	673.888	907.62	888.584	812.49	798.596	1057.04	788.498	1005.81	558.619	610.447	608.37	936.928	960.666	619.683	903.395	687.972	1097.44	813.66	1044.45	941.786	714.361	786.19	805.503	1202.31	1033.27	969.379	1630.62	1670.51	1022.37	1283.41	1246.12	1259.65	834.128
TEAD3	1392.7	1425.98	1679.9	1496.63	1489.75	1381.16	2164.65	1329.22	1433.66	2826.16	2391.62	1412.65	1718.33	1807.02	1937.15	1645.77	1686.31	1792.64	2337.51	1847.3	1440.58	1837.56	1455.07	2025.07	2047.51	2042.39	1371.17	1349.3	1965.74	2235.35	2199.55	2246.17	1287.83	1840.37	1415.41	1429.47	1969.42	1946.45	1608.95	1574.03	1346.71	2072.06	1970.67	2156.85	1994.97	1830.26	1811.75	2737.55	1541.7
SELE	33.4809	355.325	6341.07	443.24	344.637	57.4692	3601.64	369.784	25.3828	4241.08	667.874	3536.5	4426.44	1420.18	42347.2	27.7218	84.4192	3290.58	983.69	877.157	313.275	105.74	17.9883	2495.67	2494.41	453.484	2972.42	31.6065	796.574	8268.42	1360.17	1298.27	1062.91	10.6205	107.114	353.272	2247.63	107.527	130.834	78.3195	52.2807	147.004	122.346	983.258	127.305	3198.58	566.494	64.3889	303.873
DNAJC11	957.943	1173.93	1018.52	1231.43	1048.94	1124.49	1126.46	1055.25	1039.59	1218.64	1263.26	1071.63	1182.83	1134.77	1050.66	1251.65	1115.44	1002.37	1178.98	1168.51	1027.4	1050.65	1050.33	1254.13	892.731	1197.31	1010.78	1122.32	1165.48	1046.9	1167.08	1046.53	1097.55	1612.01	1013.41	1424.68	1127.58	1247.83	1068.17	1214.91	1174.29	1022.68	1658.63	1060.33	1114.23	993.331	1038.76	1593.82	1091.85
FMO3	2807.82	1954.2	2236.33	1247.34	1645.04	2549.44	1658.17	1368.12	2474.26	701.381	1340.04	1597.25	1558.59	1496.8	1387.47	1609.13	986.176	1342.29	739.303	2170.99	1884.82	2245.41	1102.3	1064.04	1473.26	1186.63	2488.03	1109.63	905.343	891.156	1742.73	1776.67	1239.9	955.337	1789.07	906.254	1349.53	1528.62	1495.63	1762.98	1370.96	931.491	372.177	1634.31	556.605	1465.7	656.68	695.939	694.62
MYLIP	4324.31	4200.53	4190.82	2453.46	4215.78	4304.31	3538.65	3489.5	4460.47	3751.73	3236.03	2737.86	2698.79	3560.63	3559.73	4376.83	3029.66	2815.87	4588.11	2715.14	3493.1	4005.04	3543.74	3218.21	2604.04	1644.28	2653.02	4624.98	4134.49	2425.45	3625.66	3117.23	4620.78	2882.3	3953.28	3217.05	2592.85	3857.7	3109.72	4014.04	3579.32	3972.13	4132.07	2859.3	2391.11	3036.04	2297.79	3667.71	2278.84
NOX1	28.8794	24.9519	21.5345	16.8558	33.0602	34.8245	16.0774	16.2546	24.2943	15.7972	38.3111	17.4829	12.0822	20.7217	6.38465	23.7662	3.33789	12.1232	18.409	18.7166	24.425	12.836	21.986	23.3121	11.5023	36.8972	12.6262	27.1511	14.4733	18.9075	22.2834	25.7628	6.03471	22.3404	37.6019	22.0578	37.8798	14.25	25.7683	20.9881	20.0385	34.3284	78.7982	18.0574	42.1019	32.3991	13.7124	16.1604	64.629
E2F2	68.8719	83.7092	120.272	117.156	30.0565	83.3141	111.139	88.6069	118.316	108.847	35.1398	93.2685	132.437	83.703	110.143	58.4202	199.316	81.6994	124.743	37.4004	124.369	79.0246	45.9705	90.5318	62.6615	107.896	81.9627	76.8517	51.6201	95.6061	85.4095	119.999	75.5895	231.806	80.3198	155.511	61.4965	624.475	54.6096	82.5424	156.297	74.757	223.919	111.343	182.592	155.332	305.671	194.093	232.779
PSMB1	5649.06	4896.13	6072.64	5818.82	4787.84	6412.59	4910.34	4660.5	5018.31	5422.47	7034.56	5196.89	5206.75	5433.05	4378.45	5911.69	5913.56	4929.32	5660.75	5758.26	6684.07	5369.6	5919.23	5327.54	7527.03	3649.08	7159.44	5064.47	5296.33	5668.7	6030.4	6019.71	4422.1	6558.28	5385.44	5427.98	5467.83	6831.16	4621.84	4865.51	4506.13	5371.53	6124.52	6235.45	5541.22	4651.67	4543.63	5277.68	4945.68
SYN1	35.3663	19.5477	25.0914	29.973	16.0305	34.9136	69.8043	40.6882	20.0973	39.9978	40.577	42.7492	40.3055	35.8578	117.447	41.5897	29.6093	26.9097	28.6373	22.9388	31.1249	16.0486	31.9795	35.8434	58.4537	31.8338	21.0349	8.99126	34.4233	138.802	13.8906	33.4369	49.2866	51.5551	66.9928	67.1991	83.8016	55.1947	43.2726	20.9937	33.7651	13.6835	71.5292	26.6273	42.0843	34.5467	95.9742	40.2473	54.4835
JARID2	1155.3	1626.41	1232.1	1297.95	1328.45	1158.28	1889.61	1413.34	1282.58	1349.8	1192.01	1266.91	1760.22	1391.54	2388.3	1334.83	1173.53	1438.8	1459.16	1212.77	1130.7	1400.86	1040.34	1307.89	984.618	2282.74	1074.88	1537.43	1590.54	2938.63	1313.77	1164.95	1569.33	1379.1	1307.4	1265.31	1109.9	2165.4	1166.02	1392.8	1605.51	1479.43	1577.78	1741.86	1396.37	1690.03	1220.01	1882.05	1505.69
CDKL5	1717.6	2588.38	2014.63	2713.09	2544.7	1577.01	2257.48	2030.04	3052.16	2361	1431.07	2129.67	1633.1	2342.14	2406.34	1726.96	1823.28	3015.03	2427.49	2287.64	1521.66	2126.91	1876.81	2335.24	1162.12	1611.62	1602.33	2068.29	2495.02	1614.61	1846.71	1405.37	1566.55	1210.52	1167.53	1514.93	880.851	765.24	1750.04	1797.56	1896.54	1002.03	1032.51	1467.73	1239.25	1602.66	1146.87	1098.96	1180.53
CAMK1G	128.527	67.6851	68.195	24.3337	32.06	72.041	77.9144	158.365	105.623	43.6977	295.731	68.0076	114.239	27.8111	94.2455	25.7411	27.4401	103.51	34.776	55.3268	40.0273	85.407	38.9749	29.5329	37.6063	82.5678	30.4941	65.1049	28.9558	41.3757	42.6837	24.4686	22.0145	129.87	120.664	123.859	39.0465	109.469	16.4978	58.125	70.0802	53.2789	78.7895	36.1464	140.46	70.1196	47.0679	94.1551	60.9448
CDK11A	1674.8	1511.51	1362.23	1449.78	1501.77	1380.01	1419.82	1370.84	1509.72	1793.55	1110.86	1213.48	1449.83	986.389	1123.75	1468.52	1375.13	1215.36	1606.4	1384.83	1379.48	1398.73	1261.2	1524.85	1108.86	1315.79	1618.07	1348.41	1244.32	1629.9	1396.41	1322	1308.07	1830.93	1443.95	1365.16	1409.75	1453.42	1536.83	1401.24	1720.79	1393.42	2541.83	1503.9	890.743	1170.21	1454.14	786.653	949.581
NADK	3759.19	4744.73	4389.12	4514.29	4888.03	4128.76	4563.12	5209.4	5599.37	5094.1	4043.12	4548.86	4541.16	5480.93	6444.78	4447.13	5662.63	6618.57	5358.08	4163.88	3976.26	4674.51	4125.37	4225.81	4519.99	7336.77	5262.94	5130.5	4612.99	6010.94	4153.02	4385.5	3655.6	5799.65	4216.21	7073.49	5637.81	4882.79	4283.98	4530.81	4876.91	4802.13	8963.87	4430.77	5387.4	4827.46	3740.56	5087.04	4515.22
TFAP2B	0	12.5744	0	0	0.000622956	4.52361	0.0478159	3.59126	0.0188229	0	0.0319408	0	0	6.39219	4.24828	21.8091	4.40029	0	44.8453	5.095	2.26331	12.7469	0	1.74965	4.18555	1.55592	0.0169128	21.9429	15.5406	0.0586812	3.6954	0.246213	0.140061	0.0739891	0	3.81848	0.0782967	5.6842	0.0130798	11.7181	3.1199	1.64907	0.0159486	836.757	2.26795	2.19755	0	11.5636	11.9673
TFAP2D	0	0	0	0	9.84e-05	0.00617811	0.00709116	0	0.00289924	0	0.00483493	0	0	0	4.11449	0	0.00479391	0	0.00118209	0	0.0054932	0.00345168	3.99874	0	0.00228235	0	0.00261173	0	0	0.00858416	0	0.0294222	0.0186332	0.0752021	0	0	0.0795885	20.9139	8.25719	57.2976	1.51548	186.021	261.129	56.1472	2.26685	21.6123	3.15318	10.4182	58.1801
DLEC1	151.714	175.421	110.324	209.902	86.1601	207.156	105.504	158.201	127.863	305.117	126.156	321.586	187.03	395.568	209.728	260.429	107.431	154.688	224.965	258.027	327.656	197.555	545.653	142.484	1919.88	290.924	90.3881	378.037	749.622	236.099	354.677	201.829	1029.69	124.183	149.006	135.344	3407.88	153.219	1582.04	226.742	139.336	757.087	292.342	251.27	352.967	395.81	272.252	55.2043	188.411
CYTH3	5643.49	5194.55	4932.96	3871.39	4758.79	5250.95	4623.84	4173.12	3320.55	4617.8	6623.32	4361.35	4848.51	4712.17	4558.49	5358.15	4804.69	4576.38	3371.3	4531.83	3295.42	4344.58	4927.86	4581.71	2765.88	2333.25	3291.85	4423.28	4094.59	3721.33	3837.34	4224.61	4639.76	3720.52	4823.48	13268.6	2885.68	2393.79	4212.91	7098.18	4965.6	8773.54	3193.92	5619.63	4781.05	3618.44	6156.38	11147.6	5514.74
ADAM22	513.906	443.574	334.708	331.742	470.869	290.442	311.727	415.956	399.353	527.476	446.302	423.603	427.503	314.95	487.189	441.645	213.704	392.95	240.304	419.884	253.274	321.4	488.689	361.253	422.867	312.975	274.248	473.904	294.518	193.641	404.81	384.613	476.105	283.35	319.922	215.991	382.544	544.459	448.066	408.917	336.875	337.159	361.792	458.794	230.183	386.108	307.214	186.091	392.592
SYPL1	5546.65	4685.93	5749.57	4814.17	5921.93	5373.67	4658.24	4771.72	5600.43	4562.91	4803.05	5134.71	5713.38	5235.28	4922.84	5688.89	5340.51	5153.63	5819.24	5420.98	6582.99	5055.69	5645.41	5396.57	6405.66	5704.59	5579.2	5713.82	5350.71	4661.98	6308.01	5742.41	6747.61	5354.82	5289.97	6525.3	5930.64	3205.69	5662.19	4740.74	4859.16	5707.86	5780.35	3804.46	5211.49	5368.87	3552.78	6114.78	4566.02
CYB561	6041.92	6851.23	6395.69	6418.6	6883.71	7979.42	4218.22	4963.42	5530.71	5308.04	8794.56	5109.45	4719.89	7421.94	4043.77	7184.14	7524.24	4972.78	6162.82	6253.94	6867.34	5315.15	6141.09	6261.64	9036.82	10926.3	5654.86	6384.86	5363.39	5541.26	5981.18	5640.84	5116.02	6650.76	4712.04	5743.83	12418.4	8664.36	7452.41	6947.18	5607.92	7789.43	6569.24	6612.38	8227.68	6937.03	6057.95	8618.06	5196.94
SPAG9	8299.49	10791.7	8523.39	10145.7	11644.5	8546.77	11627.8	10293.1	11751.3	13503.7	7259.4	9286.21	9871.2	9733.74	12447.9	9040.83	8287.98	10849.8	8416.48	9548.27	8286.81	8453.2	7871.99	8454.32	7734.83	7348.09	8185.99	9980.65	9775.21	10693	7253.17	9257.03	9308.57	6340.54	7093.24	7765.66	5409.98	5728.95	7755.25	9097.97	8997.1	9483.06	12210.7	14072.9	8961.27	9472.6	6150.6	8004.89	9386.13
CELSR3	74.4489	102.403	69.055	175.265	121.224	112.584	106.604	121.158	139.456	209.344	97.6223	140.877	174.252	114.001	93.221	174.283	107.4	151.281	170.758	107.281	111.089	123.864	126.919	121.006	117.992	208.498	122.937	160.992	154.078	96.8299	64.0319	81.6562	152.394	90.2422	125.541	288.951	190.186	324.55	131.863	132.279	156.252	453.268	1250.15	705.321	145.007	120.839	895.85	944.954	381.482
AASS	663.739	1346.71	762.733	1153.62	1405.6	793.613	1639.84	1407	1226.6	1507.01	395.921	993.899	1385.89	995.147	1965.74	752.572	909.481	1467.48	17878.7	1533.87	1016.32	1251.39	889.434	1149.2	929.283	983.93	655.661	981.206	1085.7	1155.51	865.3	1377.54	1422.79	470.69	718.595	414.714	624.634	812.845	961.034	1431.7	1042.97	1642.14	2017.26	1327.83	1109.76	1040.75	1334.76	771.683	1175.02
PLEKHG6	208.526	137.126	192.92	195.855	226.418	228.505	278.439	157.31	127.858	372.143	255.498	142.81	194.688	230.456	253.129	146.551	167.67	114.699	192.241	174.559	163.302	234.901	200.872	155.948	646.224	429.224	182.833	165.473	168.544	272.612	172.676	255.087	198.962	511.588	164.913	287.034	671.744	210.328	267.825	192.15	131.266	453.284	253.994	391.195	423.791	235.151	533.23	1082.66	285.408
SS18L2	917.934	678.693	816.625	710.359	753.391	935.363	684.144	654.661	786.027	569.299	784.06	656.772	605.436	689.77	790.112	704.054	809.731	657.222	779.172	620.848	813.019	833.893	807.486	662.452	969.977	751.064	934.062	560.684	702.361	846.225	693.555	697.116	660.621	597.121	935.534	844.817	853.671	716.702	723.103	712.379	652.773	799.039	857.314	712.909	622.979	557.625	696.534	598.326	645.668
MPND	1493.26	1140.06	1405.3	1439.47	1177.17	1313.6	1329.3	1470.31	1137.85	1029.78	1633.9	1487.46	1242.13	1122.77	1153.4	826.841	2357.92	1470.11	1090.03	1292.84	1358.37	1551.41	1610.97	1468.37	1422.09	1245.5	2128.69	1652.3	1499.9	2078.34	1277.56	1414.4	807.35	1948.01	1977.5	1792.37	1022.54	1607.61	1207.23	1114.54	1395.11	1634.26	1421.25	1218.34	1741.57	1544.44	3549.04	1678.83	1636.87
MGST1	3288.13	2498.36	3886.58	4502.11	3984.36	2692.51	3354.18	3083.47	3682.92	3309.84	2755.75	3116.77	1941.11	4353.29	2386.24	3673.76	5755.75	4892.83	12161	4552.26	4335	4930.76	5537.48	4389.86	6629.09	8286.51	5419.49	3911.39	5790.29	5544.74	6106.55	4781.02	2516.05	11943.5	3205.24	4163.62	3274.15	4983.67	3064.41	2314.24	2747.46	4095.05	6483.21	4377.46	7217.52	3162.25	8429.77	17458.8	6143.77
CRY1	1599.37	1568.48	1878.21	1688.74	1832.38	1584.9	3780.35	1397.03	1700.96	5743.52	1595.56	1567.12	3205.53	2445.79	3602.07	1914.12	2227.59	2550.74	1370.2	2680.27	2051.45	1441.46	1394.11	2055.52	4483.4	1422.81	2367.22	1759.88	2092.6	3928.91	1530.09	3456.93	1685.6	1384.97	1660.03	840.966	1577.42	2507.1	1540.96	1411.33	1793.3	1326.3	1497.96	2951.67	1364.3	1266.2	2211.75	1707.54	1769.89
PGLYRP1	53.9858	45.3973	23.2809	7.46215	27.0508	30.4457	40.1548	77.7865	50.7218	131.246	21.9807	58.2916	13.5586	42.2047	402.082	42.5771	21.9629	53.8824	69.5304	64.7304	54.4384	19.2548	31.9794	7.11374	179.498	13.7921	43.0931	15.3218	36.2168	99.0379	11.1014	93.8844	29.2349	56.8895	16.7603	9.58774	2.45355	1.87884	49.3751	27.0884	21.8312	4.23079	4.16481	8.54925	16.5922	19.3969	3.96942	2.3724	33.3394
NFIX	15590.8	14573.6	10864.7	10947.9	15115.9	11470	10632	12050.1	12139	10380.8	22318.6	11301.2	11490.7	11481.8	8944.35	11633.3	11723	10018.6	12671.2	10112.9	7101.73	8963.58	10265.5	12213.1	5701.95	8456.32	6541.66	13147.8	12529.4	7504.02	9016.33	8953.95	12541.5	19362.1	12800.4	13237.8	9917.83	4179.39	12375	15136.3	13135.8	14446.1	13087.7	17470	15063.4	21371.8	4508.65	20705.1	8741.34
ST3GAL1	4752.52	7267.18	6427.09	7590.98	7939.66	5822.81	9663.61	7757.58	6088.53	11552	3887.42	6847.58	7631.03	6857.3	11966	6415.72	9083.43	8124.3	6811.1	6374.86	6401.98	6626.32	5183.7	6616.62	6290.82	7697.12	7041.78	6912.11	6704.7	16752.1	4696.16	5742.59	4551.36	6646.06	5233.86	3621.21	3765.29	3289.45	5113.17	5259.26	6673.46	11538	7827.72	4782.95	5094.2	7578.73	5310.96	10093.6	3383.63
MMP25	727.98	2017.47	413.64	478.855	1613.98	694.557	1379.71	2034.61	1298.43	2152.65	1090.02	993.902	1142.48	2061.51	7365.94	531.75	392.318	991.917	1273.06	630.179	803.066	559.522	503.679	624.771	2541.35	317	668.266	530.818	1495.38	3538.06	369.49	1366.31	1099.07	1080.41	668.387	481.926	298.793	773.838	1048.57	748.717	935.042	532.411	407.413	482.571	577.58	742.001	525.875	279.107	589.345
IL32	11239.5	9593.68	12234.1	12465.2	6452.92	10990.4	8902.76	7231.29	6651.65	12183.6	17250.3	9776.85	6888.55	7613.27	9650.78	10266.7	8663.8	5144.9	7239.55	7472.68	12931.6	7229.59	7303.35	10458.8	9755.19	2829.31	10517.5	8958.7	6906.79	15301.7	6956.06	11784.1	6109.06	10249.5	12355.7	4663.79	6130.2	7595.46	7390.61	8415.87	8248.31	4686.84	10847.5	18440.9	8079.44	9118.86	5236.15	4756.37	8044.84
PKD1	6091.25	10806	5808.78	6514.18	10400.2	6226.89	9247.64	8741.42	7752.49	7915.58	7972.15	7537.4	8743.93	9227.41	9497.19	6806.86	5147.68	9013.68	5313.09	7924.96	5804.44	7195.41	6214.05	7877.93	4224.52	5220.71	4078.83	7709.77	8371.39	5223.79	5918.03	4261.82	7207.9	6820.47	5712.97	8473.22	9022.74	3908.13	9405.36	8913.4	8547.44	6732.33	5828.03	11359.2	6846.8	8259.25	6079.94	7602.93	7383.48
MAPK8IP2	169.427	166.547	78.0234	363.68	145.269	227.349	206.256	198.94	264.099	109.745	259.854	179.738	75.1885	196.18	122.878	232.707	203.796	184.303	242.334	126.857	86.6835	132.417	107.931	287.813	97.1214	87.3659	126.099	205.3	164.026	177.048	142.039	146.237	200.316	206.111	216.028	136.303	133.512	771.975	150.402	184.571	151.427	593.579	727.69	77.071	262.263	324.645	542.237	155.094	141.294
MED24	3147.56	3066.64	2751.37	3069.18	3051.64	2778.04	3400	2823.05	2747.93	11169.8	4298.6	3010.87	3346.14	4169.11	4287.35	3279.65	4307.24	3161.01	3146.34	5525.81	2715.65	2950.14	2950.12	3928.2	5410.6	3299.32	3940.12	3317.22	3796.43	4907.4	3101.99	3926.89	2767.14	4068.18	3598.13	2628.54	3229.22	4426.89	3248.78	2697.89	3043.31	3109.38	3797.24	4288.97	4186.87	3168.7	3662.58	3075.21	3317.14
RHOBTB2	6666.58	7127.32	7005.89	10212.2	13924.7	7859.03	10360.4	10023.6	10116.9	9908.19	10304.6	6791.23	7409.62	8851.74	6458.58	8516	12468.1	12510.3	17189.8	10334.4	7638.18	14606.5	9909.69	10726.8	4355.04	8509.46	8281.6	9128.72	15995.1	5311.15	10371.9	9199.73	6249.88	9818.6	8435.89	7612.06	4177.35	3486.47	6506.83	7528.09	8773.87	23241.3	6606.56	11004.2	6815.85	6647.99	7493.44	8420.55	6565.94
HEATR5B	2506.12	3174.42	3895.57	4193.79	3985.36	2721.76	3935.13	3170.29	3374.42	4825.27	2271.06	4179.67	3556.11	3626.02	3729.19	3421.25	3350.7	4778.11	2421.37	3806.19	2753.41	3321.7	3150	3251.38	2924.58	3291.15	5201.98	3596.68	4758.03	4115.48	3183.7	2991.54	2807.77	1864.96	3011.05	2521.99	3028.43	2612.73	3300.27	2788.17	3811.56	2584.73	2021.47	2801.25	2860.2	2856.98	2505.94	2158.84	2306.57
SEC62	13147.9	11754.5	11453.4	11305.9	12756.6	12337.8	10480.7	10217.1	13095.1	10208.7	8643.28	9964.36	11314.2	11465	10082.9	9616.15	10475	10357.7	10521.9	10917.8	12099.8	9922.39	11821.5	9995.31	12632.8	13672.3	11198.3	10458.1	11302.3	11683.2	11292	12152.2	11104.4	9770.68	10522.2	11193	8031.11	7394.62	11290.4	13552.1	10786.3	10757.8	13101.1	12159.7	7785.14	11609.2	8085.12	9085.47	8232.35
RPS20	50010.2	30928.5	39432.2	34801.4	39166.3	44550.5	33098	35881.6	35665.9	33599.1	54924.5	28787.4	33310.4	30441.3	35587.8	36898.1	44996.5	35466.9	42964.8	34121.2	42282.5	42076.9	51090.5	33790.5	56909.6	39785.9	57686.4	35772.4	40705.9	34951.6	44837.5	45757.8	32593	38245.6	50878.2	41029.6	38052.5	55173.8	40090.6	30339.1	34711.6	48757.9	31952.6	40576.7	54968.2	32331.8	26546.8	33568.6	40927.2
CSDE1	42180.8	36811.6	39737.3	35582	40603	39682.2	32853.9	31846.9	37462.9	35258.7	36928.5	31167.8	31462.8	35113.6	33472.7	37112	34195	36971.8	29088	36382.4	36069.4	31048.4	36408.8	30723.7	35393.5	28476.4	38084.6	31957.8	33199.1	32581.7	32697.8	36641.4	30884.3	31579.6	31122.8	40416.2	25345.9	22942.5	34424.3	31280.9	32365.5	17219.9	22783.4	39503	24641	24079	22984.2	27395.3	28274.8
UBE3C	4401.56	4947.8	5447.16	4992.24	4719.72	4852.52	5617.36	4806.09	4409.78	5683.88	4504.78	5050.19	5908.9	5400.37	5545.6	4983.84	5641.82	4858.91	6329.48	5219.99	5042.5	4765.27	4982.83	5487.12	4853.06	4928.16	5010.78	4570.68	5038.95	6215.12	4744.46	4298.65	5255.31	5178.02	4876.23	5048.78	5226.94	4206.05	4469.39	4562.86	4838.23	4414.2	4679.43	3778.76	4026.47	4836.08	4013.68	6391.49	4435.78
REV3L	3451.99	3235	2728.04	3626.81	3441.35	2699.24	3982.09	4044.74	3900.54	3206.6	1961.82	3649.2	4668.31	3456.97	4497.04	2827.11	2608.91	3173.2	3256.77	2928.93	2976.64	2787.85	3111.02	2896.39	2605.08	2057.02	2613.1	3382.35	3050.55	3048.58	2994.3	3074.66	4884.91	1669.47	2974.19	2490.31	2007.21	1630.44	2933.58	2913.8	3828.48	2730.95	2635.16	4336.59	2004.94	2920.61	2183.22	1952.16	2095.95
TENM1	169.421	397.35	226.148	178.988	162.3	121.613	364.298	219.736	333.816	173.946	203.969	244.838	191.664	220.901	318.768	142.591	89.8941	229.523	65.4543	264.91	121.106	283.993	170.891	160.439	90.8592	117.616	124.001	135.624	250.151	96.8622	155.965	166.569	255.42	45.7553	132.258	169.909	148.845	19627.9	232.798	288.334	298.207	135.837	37.3403	126.571	133.932	262.09	103.944	29.94	162.548
PAX7	0	0.856346	0	1.86423	0.00046379	2.26182	0.0349097	0	0.0139072	1.84913	1.12325	0	0	0	12.5491	11.9076	0.0232665	7.10612	0.00561068	1.67434	8.71093	0.0166137	0	14.6964	0.0109065	0	0.0125059	0	0	0.0426541	0	6.61757	4.20236	0.0769366	0.762322	395.54	7.17551	3325.27	2.07436	497.518	0	21.4264	3585.28	0	2.26356	0.0354035	17.7804	0.066853	719.695
MASP2	57.6955	93.5208	56.499	89.026	119.22	81.0617	59.6368	96.7562	139.429	147.02	80.0651	122.425	79.0712	119.67	77.3268	54.4592	70.1487	99.1132	49.0909	100.507	65.5614	84.3579	89.9427	122.842	57.4419	54.6898	58.8561	104.011	96.9741	23.7041	87.27	70.4571	159.376	39.8619	59.4523	73.9271	48.4509	179.987	74.1597	114.786	77.4079	120.544	114.003	109.494	63.0725	95.951	117.202	42.5333	73.9087
IYD	250.402	334.877	245.845	390.788	509.941	371.47	277.364	258.581	240.901	536.775	349.828	141.833	272.999	206.45	235.15	300.038	364.888	262.504	608.399	278.453	263.271	276.564	337.785	271.586	246.429	3677.04	238.528	242.334	367.032	108.683	152.231	207.446	435.527	1177.67	355.882	1092.52	3566.21	462.561	227.658	332.947	237.655	196.892	2226.66	2662.39	742.456	918.894	74.6745	362.939	492.324
FAM76A	827.615	851.495	1173.81	915.603	770.423	800.326	963.725	733.329	895.902	806.525	762.142	849.145	709.65	848.475	677.857	736.731	806.457	877.189	692.261	1107.22	859.676	1074.12	903.425	859.679	895.855	753.496	1090.62	742.471	927.131	886.37	892.254	874.541	724.513	871	836.712	1116.52	871.35	434.958	821.981	773.111	785.806	871.321	595.046	556.807	686.031	846.638	503.069	775.126	755.61
TRAF3IP3	870.452	883.579	851.628	759.095	736.36	918.481	630.293	886.176	942.375	1096.8	358.627	609.164	531.633	774.321	1050.64	942.703	529.259	645.919	799.622	450.485	708.628	800.796	627.601	631.97	461.517	994.668	582.099	674.646	576.374	688.106	826.337	996.311	622.893	598.281	979.952	948.508	741.506	1007.98	748.851	859.959	1141.31	1248.98	818.955	742.422	885.177	1350.26	582.735	366.384	1457.71
POMT2	687.031	816.756	795.074	857.496	845.561	793.571	744.882	778.547	881.111	876.3	975.953	920.071	918.887	911.49	621.726	816.941	848.088	833.717	1029.69	758.829	909.649	834.968	962.388	959.196	856.18	888.374	658.8	881.759	849.184	814.386	819.829	778.473	897.186	979.91	796.463	1040.66	800.567	3966.33	783.878	902.926	887.325	1857.97	2203.88	884.241	812.181	997.643	1024.94	1666.15	1390.24
VTA1	1986.66	1983.57	2471.42	2122.66	1991.68	2242.21	1895.39	1744.28	2358.07	2077.26	1644.9	1981.02	2168.66	1923.44	1753.93	1951.75	2295.51	2005.63	2114.6	1858.36	2389.07	1928.32	2289.54	1992.78	2648.92	1666.38	2548.98	1785.21	2011.95	2148.04	1929.35	2030.07	2006.35	2192.75	1901.21	2149.49	2461.75	2246.27	1914.87	1839.61	2058.42	1891.41	2842.49	2576.61	1993.88	2048.12	1518.29	1715.63	1745.85
MLXIPL	107.053	110.437	98.695	91.8275	157.29	72.0837	66.5209	96.737	148.952	86.4959	61.4491	96.1794	111.038	134.792	78.3941	214.889	104.105	151.303	189.156	127.761	56.694	132.392	95.9388	76.1634	49.0949	90.6754	115.579	103.085	176.77	119.207	80.7552	99.9752	142.194	44.5814	123.914	230.419	134.639	44.7084	110.225	101.957	138.588	63.5788	470.57	15.2024	46.5304	88.4719	327.738	358.109	49.8403
BAZ1B	5524.31	5661.26	5408.57	4977.24	5679.49	5114.78	5128.06	5043.01	5803.27	5941.57	4822.78	5347.49	5025.72	5401.16	4748.08	5414.59	4751.02	5594.42	5634.16	4926.15	4777.05	4487.67	5036.79	5348.17	3852.81	5246.91	4617.82	5339.41	5156.77	5586.08	5235.62	5300.57	5603.7	5806.69	4787.43	7240.53	4507.93	5198.79	5049.31	5524.84	5568.44	6154.29	7381.96	4979.03	5332.09	5862.83	4427.4	7968.11	4481.96
RANBP9	2157.96	2028.1	2151.03	1938.03	1982.66	1900.05	2786.88	1963.12	2064.38	1978.65	1891.62	1979.07	2398.39	1970.48	2679.59	1891.34	1970.11	2162.12	2395.8	2299.55	2073.66	2243.3	2091.67	1973.05	2270.96	3252.01	2294.72	1861.18	2079.01	2803.04	2375.02	3039.21	2160.23	2136.58	2047.77	2349.17	2023.77	3958.6	1885	1797.44	1973.76	3620.33	2531.5	3232.42	2777.25	4065.99	2197.01	4610.42	1967.54
ETV7	463.614	550.462	480.101	871.609	382.707	404.115	440.053	289.326	494.435	857.754	588.846	529.505	237.223	329.288	454.371	291.125	284.921	256.411	561.368	798.129	288.818	261.62	263.832	492.146	517.88	616.273	344.643	473.887	340.738	636.096	439.157	451.179	154.126	660.318	285.519	1000.35	328.325	1132.67	244.138	555.552	495.596	875.616	701.818	335.973	437.102	594.288	831.504	408.868	503.408
SPRTN	529.701	590.516	684.708	553.849	555.025	590.962	664.646	562.429	586.357	656.76	350.947	608.196	778.957	613.223	653.485	609.982	548.97	540.724	747.471	739.276	721.937	591.529	558.644	640.052	756.981	797.692	734.434	595.969	600.857	681	558.925	660.058	659.107	471.853	520.072	735.378	710.794	739.556	506.794	545.445	590.733	674.33	884.256	609.163	523.392	733.397	685.188	853.184	710.349
METTL13	2137.48	2064.62	1953.6	2054.25	2109.9	2283.86	1694.87	2127.7	2349.62	1980.51	2515.55	2031.54	1841.54	2055.02	1309.11	2452.81	2716.25	2134.3	2206.63	1798.74	2072.54	2067.12	2397.47	2039.39	1671.64	2974.13	2325.19	2448.14	1963.91	1889.59	1956.27	1665.99	1987.48	2683.25	2350.16	2985.69	2245.71	2246.27	1977.7	2402.83	2484.79	2785.99	3385.68	2529.02	2413.22	2575.51	2692.07	3224.44	2615.1
DYRK4	887.216	560.222	657.774	746.915	626.156	908.341	664.657	801.174	604.32	576.745	837.778	730.616	607.731	654.686	470.273	772.382	691.401	678.968	775.08	724.781	914.066	704.703	641.592	691.148	800.836	657.069	687.16	476.573	527.434	483.956	781.772	628.726	680.906	557.302	798.188	454.077	643.512	631.994	598.466	640.729	687.467	471.305	790.963	494.937	772.319	486.439	663.233	618.973	920.055
ZNF207	5160.29	5265.77	6226.98	6173.06	5266.73	5369.18	6153.67	5701.3	5756.79	7751.86	4621.03	6892.28	6229.86	5717.73	7101.45	5755.23	6150.24	6252.52	7440.98	6763.25	6339.78	7039.52	6424.91	6456.17	7221.12	8589.63	6618.34	5882.93	6448.23	7833.23	6752.74	6982.92	6431.22	5532.78	5818.46	5699.67	5576.46	9125.04	4757.81	6469.12	5328.23	7662.11	7293.86	8775.91	6832.46	7439.62	6883.78	6603.97	7567.27
UQCRC1	5282.25	4888.12	5333.18	5556.41	4861.98	5686.58	5388.18	4579.12	4579.87	4842.92	7571.87	4771.35	4687.96	5124.43	4554.26	5975.07	6678.35	5366.63	4972.59	5194.43	6158.72	5114.42	6033.16	5505.94	6975.74	3896.72	7239.29	5582.68	5435	6560.93	6127.89	5291.36	4272.58	7209.16	5677.76	4896.13	6962.54	4605.81	4971.03	4685.93	5526.52	3324.38	4849.45	4165.21	5398.48	3672.38	5407.69	4783.91	4295.37
STARD3NL	3087.05	2752.23	3472	3246.32	3528.52	3621.08	2854.54	2492.1	3774.81	2806.58	2392.77	2720.38	3076.89	2987.25	3203.87	3010.31	3118.4	2891.52	3984.81	3040.51	3561.95	2878.6	3370.86	2787.92	3594.89	1877.22	3699.5	2315.17	3500.09	3537.17	2826.24	3337.1	2537.74	2333.25	3291.59	2575.74	2144.2	3653.06	2307.32	2415.45	2532.32	1498.3	3478.99	2905.94	2304.8	1880.96	2689.6	3420.82	2187.39
CD9	23762.7	23710.3	32224.4	34694.6	28731.1	24976.2	35407	25829.1	25578.6	32157.2	29733.8	28357.1	15593.6	30424.6	25977.2	29366.3	38710.4	34227.2	20602	29539.1	26279.8	25300.8	32585.3	35877.4	40764.4	18414	47220.4	30852.7	28028.8	37043	32566	27416	21459.7	22097	29054	17456.2	23335.2	12894.2	22411.8	16958.2	28217.2	12762.7	17719.4	24978	29266	15705.4	14825.9	36985.9	19220.2
HHATL	0	0.839863	0	1.84562	0.000664289	3.42389	5.75778	0.859761	2.13797	0	5.5037	4.8501	27.9949	9.61009	4.2553	9.90457	0.0338733	1.67814	0.00806581	0.782566	2.2696	9.59643	14.991	0	43.6455	0	0.0180672	3.58223	5.41675	10.5684	13.0409	27.5628	19.6968	2.42708	0.760418	8.61802	36.6906	0	29.8873	0.768586	1.51654	17.9838	120.242	1.87977	193.515	4.35543	4141.86	9.2691	0
NCAPD2	2293.88	2187.54	1772.32	2128.28	2122.92	2609.15	1959.57	1964.02	2273.56	1626.07	2567.09	2109.26	2182.35	2140.36	1437.26	2491.43	3247.65	2452.51	2468.4	2010.82	2245.8	2098.09	1955.76	2120.97	1313.52	2063.61	2001.58	2841.56	2056.36	2094.94	2092.76	1758.41	1868.47	3208.89	2200.21	1397.78	1821.88	4436.42	2073.5	2505.68	2451.73	1417.44	2557.42	1808.47	2534.94	1896.06	2722.94	2878.83	2544.89
IFFO1	1488.59	2305.14	2002.08	1898.68	1892.49	1825.74	1396.93	2295.92	1823.5	1620.5	1213.95	2000.45	1606.5	1585.31	1413.95	1619.03	1880.24	1990	1662.64	1854.97	1747.11	2091.67	1957.75	1967.69	899.005	1397.5	1828.21	1984.2	1860.61	1513.1	2064.92	1238.97	1522.96	1292.44	1673.5	1253.8	1185.42	1665.69	1595.54	1911.41	2170.64	1070	800.304	931.834	1558.98	1526.08	1211.92	724.639	1489.08
GIPR	184.319	94.362	89.6892	174.299	204.378	146.367	111.217	167.265	159.543	211.166	139.298	166.131	133.794	172.209	145.119	141.6	319.903	146.015	287.325	173.715	115.556	224.221	218.861	195.413	487.544	432.531	68.3224	279.477	290.949	199.477	188.469	149.998	403.18	130.034	165.764	291.842	1268.68	375.97	485.142	344.828	154.656	416.334	750.487	869.104	413.8	401.197	265.752	189.531	206.89
PHF7	268.113	268.985	240.486	238.029	268.496	289.278	213.176	311.977	256.731	221.388	239.069	242.887	244.906	228.036	192.778	301.031	248.737	310.379	293.466	285.317	242.143	248.788	282.82	216.917	302.791	294.228	184.938	276.736	197.545	238.435	311.973	249.681	259.895	239.996	200.987	226.564	356.482	220.816	332.695	308.619	215.173	171.13	199.043	186.549	260.013	188.757	237.34	134.41	208.755
SEMA3G	7537.98	15847.4	12190.2	6445.77	10296	12030.4	3812.58	2754.31	16876.2	6030.86	13408.9	7522.82	1132.5	9432.37	2796.13	9276.5	4884.71	3976.46	1375.32	11991.9	5109.16	5241.49	8674.48	9885.09	3606.4	730.542	5502.51	5751.79	7884.71	4405.9	4702.66	7509.84	596.917	3549.48	2082.98	902.405	2256.31	2029.26	9125.11	11531	5740.44	307.85	250.89	765.248	4366.03	1302.88	1140.31	484.673	1003.14
NISCH	5306.46	7268.99	5066.65	5496.43	6436.89	5254.36	5070.77	6346.95	6925.25	6101.57	6496.15	5568.03	5104.05	5748.05	5406.86	5383.9	4909.9	6280.35	5975.69	6140.67	4907.01	6632.71	5529.48	6224.89	3965.57	6008.62	4325.73	6157.87	6285.11	4043.56	5791.77	5084.35	5795.36	4392.48	5166.05	4562.05	4529.15	3475.06	5394.37	6417.77	6127.87	4291.22	4805.9	5089.46	4366.13	4018.57	6683.12	3802.09	4186.38
STAB1	2359.02	4244.15	3948.49	4247.19	3611.67	3778.7	6559.28	5574.72	5051.06	3173.09	1564.87	4384.67	13223.1	4182.62	7548.38	2508.26	2241.87	7000.24	18931.1	4152.8	5235.75	3808.6	3226.95	3803.58	1629.89	3549.38	2596.29	4233.35	2554.78	8241.5	2884.72	2583.15	6718.51	3473.51	3769.8	3392.72	3968.34	7585.03	2579.26	6412.7	6953.21	2877.97	4705.35	3112.48	5344.23	3525.69	6939.97	5498.11	6216.79
FUZ	1175.8	1018.05	988.008	908.092	988.826	1081.72	880.113	939.498	987.823	937.686	1418.96	785.987	926.441	1089.3	872.737	1141.74	1188.85	1140.61	1036.85	1026.26	932.996	976.982	1115.29	889.244	3762.89	885.882	1121.1	1357.47	1246.15	887.586	1208.86	883.944	1001.77	1242.11	1410.47	776.648	3621.96	1583.83	2185.74	773.075	971.158	1229.14	1026.29	1063.19	1113.12	932.936	662.376	1353.85	830.419
SLC6A13	96.8172	115.807	122.067	96.5249	78.1447	104.677	61.9297	40.6452	75.0235	37.1754	214.811	91.3246	37.9142	61.3346	45.5693	83.178	92.0475	119.128	189.148	65.534	48.9177	97.1653	70.9547	211.685	91.886	31.7773	115.569	95.8591	50.7128	153.334	120.715	55.7889	46.6567	68.9279	65.45	40.3234	85.9471	24.7326	81.3376	56.5651	99.4784	10.2474	26.9622	0	40.9316	15.1362	20.2479	13.8521	18.4428
IDS	10307.6	9399.5	9503.35	9928.26	9922.32	7992.98	10444	10066.1	8650.51	12590.1	11662.1	9992.54	8252.46	11158.8	13287.8	10922.3	10727	10924.6	5867.31	10139.3	6728.54	8235.38	9869.72	10745.6	8779.99	5854.09	10179.2	8988.54	9107.27	12392.5	8923.49	9673	7856.9	10192.1	8643.54	15022.5	6796.12	5490.04	10250	8081.97	9429.06	10071.4	8166.72	8379.93	7699.94	8196.75	7170.68	9225.56	13782.2
PRSS3	0.89719	1.72561	1.74242	1.8423	2.00464	0.0491676	9.20669	0.857443	0.0222547	0	0.0379088	0.957648	155.023	0	16.9344	1.9755	0.0375702	3.41228	4.10095	5.04261	0.043385	0.0266553	1.99841	0	3.15437	120.962	0.0199852	4.47671	6.30588	18.8256	5.53959	4.08988	38.3934	281.957	40.1142	0	415.206	136.107	6.1962	5.81893	0	18.8433	72.5806	6.63718	2.26522	23.7721	10.4633	9.26741	72.0197
ZNF200	419.846	571.827	481.884	449.824	460.851	514.415	483.604	550.687	629.659	492.098	370.675	570.308	744.01	537.475	725.486	484.223	363.807	470.31	584.889	527.185	603.093	482.622	433.724	538.756	547.119	468.27	574.731	507.343	420.495	611.351	482.793	408.805	579.234	371.171	501.669	534.73	443.985	472.089	379.068	488.972	464.198	515.203	858.329	576.809	497.929	545.737	722.637	636.158	552.39
CD4	4819.55	7958.36	8684.05	6951.83	5921.94	5918.49	7552.85	8965.67	6755.17	4960.12	6942.48	7824.98	12877.5	6972.92	9343.62	7252.47	10414.7	11422.7	8704.83	7392.64	6560.82	8413.68	6889.62	7202	4836.37	5925.21	7639.62	10187.8	8293.44	14003.4	7915.18	7175.33	6075.63	12801.5	7312.67	7528.52	5393.47	6676.01	5720.91	7173.11	10084.4	5977.92	5363.63	4589.72	10390.8	9632.24	7489.33	5919.6	8277.63
LRRC23	701.926	344.643	511.47	491.045	547.011	701.287	416.043	393.303	508.192	666.976	795.038	573.213	378.694	772.696	453.334	752.575	834.945	481.576	542.974	729.011	757.507	508.266	1199.24	432.037	7898.34	639.872	548.483	985.767	1020.48	707.009	930.321	874.565	1117.77	655.64	612.202	297.587	6481.83	353.098	3398.04	483.877	400.476	1157.78	504.862	683.404	1428.39	633.113	429.899	517.947	684.472
BTK	1209.29	1735.95	2164.51	2284.8	1711.16	1493.72	1670.79	2003.82	1823.5	1822.37	955.167	2191.85	1486.29	1586.1	1991.16	1936.9	2990.15	2278.64	1161.61	2035.53	1530.54	2006.26	2219.59	1636.88	1402.26	1469.42	3543.96	2005.9	2401.68	2584.68	2287.75	1505.14	833.517	1715.07	1922.22	1199.06	723.848	1213.55	1259.76	1422.3	2147.98	1056.21	840.737	951.816	1531.36	1916.51	884.279	790.104	1654.42
HFE	912.326	1325.37	1053.53	1086.16	1061.96	1139.12	996.981	1180.96	1099.8	773.024	1038.47	1004.59	1164.58	834.086	821.9	1135.8	1161.45	1114.53	1381.44	1050.12	960.757	1115.78	1077.31	834.56	803.983	1733.54	1020.23	1174.78	941.616	1261.66	928.454	1098.24	829.061	1837.95	969.005	950.415	844.26	625.319	900.273	1106.97	1163.79	1491.49	1213.92	908.985	912.87	780.877	1779.32	1482.46	508.018
SCMH1	2073.24	2114.51	1787.58	1991.46	2299.25	1937.19	1793.41	1796.73	1924.92	2034.47	2715.11	1617.65	1623.21	1899.52	1721.1	2010.17	2054.46	1841.31	1981.67	2197.36	1852.63	1863.19	2248.57	2146.98	1784.4	2688.89	1756.77	1987.8	1985.67	1655.92	2472.52	1900.67	1679.75	2220.82	1746.27	3170.03	1543.22	1467.68	1933.41	1764.59	1649.78	2275.93	2273.37	2551.87	1954.04	1914.38	1577.64	11678.7	1722.76
FYN	6462.72	6069.2	5792.65	5102.82	5408.99	6529.65	7207.88	4945.34	6246.99	5372.24	5395.19	5437.84	8092.85	6284.76	7552.63	6067.16	3453.72	4956.27	4455.19	5155.25	7688.1	5465.7	5463.52	4830.01	3796.43	1984.25	5882.85	4161.89	4387.31	4509.74	5604.22	7393.17	6209.06	3335.36	7048.99	2462.46	2500.77	2799.27	5672.47	5524.08	5417.81	2147.71	2496.26	2012.15	3898.09	4101.6	3791.81	2613.61	4077.39
HIVEP2	2764.93	2828.83	2999.06	3070.12	2987.52	2424.6	6677.21	2568.05	2293.65	9865.53	2593.44	2449.31	2911.04	2931.41	7339.69	2329.02	2687.8	3651.37	2015.42	2964.7	1666.07	2266.81	1742.89	2937.62	3878.89	2190.24	2514.33	2847.85	2644.52	8925.85	2058.38	3455.45	2261.96	2247.77	1991.67	2391.42	2147.72	1948.35	2721.39	2762.01	2978.89	2875.45	2181.11	4590.73	1900.94	3057.59	2768.48	2068.14	2313.03
FMO1	67.0152	62.3217	218.243	14.0218	64.1188	69.8093	196.892	65.0852	71.8495	11.1237	46.0945	50.5112	103.5	81.3307	52.9762	27.7214	94.2219	43.4142	307.715	30.5856	30.0447	150.495	48.9686	51.958	28.2141	86.6333	65.1543	84.1049	67.9537	26.0608	103.074	86.8836	62.5352	75.004	84.5236	177.607	172.379	158.95	63.8782	93.5234	119.231	64.4404	130.626	60.8927	66.4406	50.7326	30.7804	105.695	175.513
TCEB3	3677.28	3560.1	3028.67	3670.84	4452.22	3283.43	3324.38	3586.25	4870.39	4131.28	4051.87	3275.14	3457.2	3344.49	2993.11	4067.88	4500.08	3747.86	4636.17	3656.28	3345.39	4194.03	3689.65	3788.35	2796.16	4793.36	3501.98	4414.25	4695.49	4011.64	4347.09	3461.09	3535.04	4762.41	3570.46	5906.1	2558.63	2436.62	3349.73	3935.59	4055.63	5566.84	3929.94	5607.26	4078.46	4366.92	2609.09	4891.81	3465.85
LYPLA2	3345.86	2415.54	2800.74	3007.34	2460.54	2789.28	2781.2	2633.16	2399.29	3108.92	4526.66	2747.58	2720.87	3038.29	2588.52	3157.85	3744.04	2681.12	3920.39	2949.38	3107.7	3150.87	3110.02	3436.06	3755.69	4485.28	3691.09	3106.51	3026.08	4648.9	3386.12	3093.13	2402.75	4825.62	4057.1	6333.31	4924.66	3851.98	2886.21	2990.44	2849.05	3919.63	4279.28	4591.64	4960.29	3665.9	3157.77	6421.31	4192.85
CLCN6	1375.02	1693.22	1270.68	1411.35	1716.17	1567.98	1307.54	1870.91	1624.87	1680.98	1939.83	1579.76	1589.03	1515.15	1494.43	1537.83	1441.97	2054.36	1321.12	1531.33	1259.54	1374.17	1320.16	1396.64	882.297	1461.27	1069.63	1781.62	1692.04	1216.87	1345.34	1203.78	1518.55	1171.88	1474.96	1427.57	1015.43	1416.3	1383.35	1537.86	1613.61	1556.88	976.53	1970.32	1378.65	1195	1180.21	980.69	1203.63
MRC2	10754.4	13394.3	8993.63	7980.83	9348.26	9874.98	10205.7	10113.2	10299.7	6768.54	21590.5	8055.23	10673	9189.86	12401.3	8842.78	7050.93	12060.8	15753.1	9821.66	8691.1	12174.2	6939.58	8768.97	5643.47	8064.04	8047.3	8503.8	8234.51	6614.12	10697.8	10497.5	8256.12	11636.7	9756.69	7881.82	6458.43	7294.69	6720.05	10208.3	9859.48	9418.52	6095.5	9865.76	9999.14	6288.86	7726.68	11116.8	9508.98
SLC6A7	0	2.6231	4.45144	6.54845	5.00981	6.77456	39.5797	9.95906	0.0205728	1.82764	7.68454	8.74437	7.58388	15.2924	6.36662	3.95726	0.0346672	18.3931	8.18123	4.20458	4.48046	8.54245	0	3.54407	1.06477	14.8284	10.4979	9.04752	0.862111	3.61151	20.5183	12.622	7.31338	7.08874	14.2391	1.89967	16.5037	17.1417	4.1347	12.632	14.5116	15.494	5.19979	0	15.4821	5.42739	20.3971	6.94687	17.5675
TSPAN9	8289.26	10091.6	8589.83	7025.87	8570.83	9395.44	7619.31	7064.01	6933.72	6890.42	9949.26	7303.25	7361.74	7827.83	7234.91	8370.44	7108.98	7687.86	5100.41	8304.82	7214.99	7259.47	7493.23	7458.39	4782.07	2253.13	6042.57	8300.33	6740.95	4830.78	7422.16	7204.86	8211	5696.59	6574.04	3770.02	4348.5	2867.8	7421.49	7904.23	6146.41	2758.42	3288.26	4138.57	4807.6	2819.27	3878.77	5877.02	4441.34
BTBD7	1997.82	2665.85	2137.57	2357.89	2501.62	2265.87	2518.76	2432.43	2554.58	2744.27	2102.17	2491.09	3001.64	2534.31	2823.63	2475.58	2176.1	2569	2508.28	2039.76	1948.16	2025.49	2169.62	2312.81	1880.47	2630.82	1835.58	2627.2	2196.83	2398.26	2088.11	2263.04	3084.85	2353.12	1863.52	2059.25	1857.28	1650.43	2125	2556.29	2504.96	2465.15	3228.11	2413.85	2002.73	2104.2	2084.05	3109.6	2091.33
APBA3	1339.66	1154.34	1041.86	1004.63	1077.99	1208.9	1043.96	1034.45	1239.25	1060.49	1265.45	946.299	1001.01	950.532	938.399	1110.05	1147.21	1058.88	1203.52	1141.26	1175.1	1205.46	1099.3	1151.93	947.023	1096.77	1007.63	983.942	1024.09	1104.71	1049.16	834.036	726.022	929.584	1458.2	820.809	1105.16	1184.05	1117.61	999.886	1286.33	1196.44	2116.81	1184.08	1266.91	1306.09	2286.62	1704.05	1265.52
MKS1	525.988	469.38	382.259	417.021	481.89	466.022	405.696	422.265	419.437	451.163	539.521	485.779	415.269	458.504	423.664	483.232	499.654	467.703	422.312	563.82	456.509	522.122	502.68	514.55	1124.47	731.522	485.428	618.601	548.303	363.57	596.081	454.951	608.236	366.501	416.205	495.363	1313.95	996.567	721.035	467.874	446.443	785.319	703.885	770.036	599.723	445.454	720.975	849.725	722.365
ABHD5	1458.79	1392.12	2361.04	1964.28	2065.81	1150.42	2330.82	1751.52	1662.92	1658.64	961.748	1569.07	1932.84	1990.43	3199.6	1324.93	1943.8	2751.6	1178.99	2060.23	1614.96	2178.16	2092.67	1679.01	2268.87	1324.74	3785.62	1988.71	2978.1	4348.98	1700.94	1843.38	1086.09	1531.26	2191.97	1179.87	900.927	642.452	1579.06	1060.59	1461.23	544.398	963.057	1263.08	1071.09	982.551	1385.05	1140.3	864.594
ANOS1	12444.1	14718.8	11130.3	11390.2	11168.6	13523.1	12714.1	8208.78	7753.56	10425.4	15866.4	11840.5	8969	10997.7	7914.88	13540.4	13194.5	9892.58	7145.48	10990.2	10366	10705	14330.9	15322.9	6729.36	3004.21	9758.88	13420.9	10912.6	9613.08	8735	9782.16	18224.8	8794.19	10944.5	1799.07	4365.05	1570.47	8720.38	11309.6	14391.8	1003.7	2879.82	4704.91	8562.89	3835.23	5289.04	2371.33	1693.17
AKAP8L	2952.08	2572.33	2168.08	1843.38	2505.63	2270.37	2334.27	2280.52	2317.93	2484.72	2388.36	2036.39	1805.77	1995.2	2317.38	1794.3	2055.57	2626.38	2127.9	2333.61	1987.03	2466.45	2195.6	2422.18	2737.67	2996.99	2176	2412.86	2395.31	2181.11	2685.13	2414.57	2103.64	1950.43	2677.66	1854.76	2637.67	2535.63	2493.75	2721.55	2463.04	2556.33	3777.53	3247.67	2320.28	2768.55	2210.85	3167.02	3161.97
MBTD1	1510.95	1807.24	1225.82	1471.34	1748.23	1463.3	1026.8	1573.4	1754.81	1110.71	1206.26	1606	1586.77	1308.6	1266.73	1424.94	1170.24	1317.09	1316	1335.43	1417.23	1353.88	1309.17	1207.49	1038.91	1596.97	1173.64	1544.67	1356.7	809.717	1201.42	1065.14	1921.97	879.251	1569.6	1347.88	1035.51	2284.39	1306.1	1467.86	1509.61	1668.7	2557.38	1811.35	1187.25	1451.68	1162.31	1364.2	1463.21
UTP18	1748.33	1760.89	2155.53	1951.16	1870.45	1931.56	1922.89	1732.53	1810.82	2302.4	1535.24	1818.76	1758.63	1707.32	1751.81	2094.34	2000.77	2257.77	2072.68	1692.28	1930.37	1736.13	2271.55	1777.63	2391.02	2168.24	2456.52	1515.7	1794.44	2664.93	1991.56	1865.54	1447.51	2102.6	2023.51	2097.65	1995.4	2845.93	1716.07	1617.87	1886.74	2124.52	2873.58	1998.84	2202.99	1818.4	1615.84	2218.56	2055.31
RNF216	2718.39	2860.91	2379.86	2495.64	2810.19	2361.55	2819	2795.94	2474.3	2674.49	3132.93	2521.21	3009.21	2728.88	2985.68	2901.38	2716.28	3168.87	2749.6	2838.67	2511.27	2794.24	2536.39	2953.77	2130.01	2331.66	2368.28	2907.56	2955.4	2751.15	2770.54	2603.21	2836.71	3385.66	2706.95	3294.81	2782.92	2718.37	2716.25	2591.67	2841.83	2910.69	3937.18	3356.16	2981.94	2563.65	2683.91	4435.88	2359.21
TTC19	2683.95	2860.91	2719.98	2686.83	2820.21	2713.86	2415.65	2313.96	2825.04	2595.41	2571.5	2674.71	2318.47	2819.79	2490.02	3216.28	3054.84	2686.35	2737.33	2974.95	2617.89	2726.98	2810.21	2971.7	2903.69	2568.68	2661.42	2510.52	3084.1	2667.36	3670.25	3032.03	2383.84	2515.85	2546.99	3207.46	2269.32	2794.52	2500.96	2444.98	2406.61	3913.69	1884.64	2384.34	3059.38	2924.94	2210.03	2804.18	2749.97
PTBP1	12973.8	13578.6	14448	12154	11532.3	12744.2	16062.5	12130.5	12160.1	17300	15194.2	12525.4	15326.7	13520.1	16579.6	14678.2	14475.4	13723.9	14703	14201	13067.2	12032.2	11920.4	14502.6	12456.3	14915.3	12409.8	12729.9	13435.7	18803.5	12759.9	13884.6	12650.5	16199	13644.6	13337.7	13491.8	15101.5	11805.4	13871.6	12862.5	12923.6	17585.7	14906.7	14477	15214.6	20567	17824.1	13708.3
DPF1	27.9451	13.3241	16.1287	19.6737	14.0265	6.81619	20.6368	14.4397	29.5642	16.7296	18.6559	20.4006	44.3598	14.2932	25.4116	12.8696	21.9159	26.1018	57.2248	13.5789	50.9446	11.7707	26.983	23.3116	41.7262	12.1919	15.7731	9.90676	12.6549	11.87	1.81969	5.97021	6.03501	10.626	29.2804	15.3416	50.7124	37.1193	23.7009	15.1014	4.72875	53.3834	46.6414	30.4498	36.5181	21.5991	101.127	112.217	26.7684
SYT7	443.139	484.554	235.076	283.94	454.84	383.845	572.914	547.101	272.591	314.411	373.946	430.403	679.429	453.766	613.208	390.151	294.773	275.55	496.948	266.529	410.956	448.441	180.885	326.282	313.246	214.049	365.649	435.005	252.821	185.382	173.589	353.257	856.023	215.507	552.715	1809.68	477.087	3718.86	612.892	784.043	416.589	744.836	1865.94	672.929	703.75	863.91	859.925	2884.31	436.891
LARS2	825.745	896.021	1057.12	970.89	934.726	872.371	1006.14	1069.73	890.626	860.476	996.801	1019.17	989.61	964.9	930.982	975.379	1182.26	1013.68	1300.66	955.577	815.266	1058.12	1014.35	1054.21	932.403	1223.49	990.812	1072.58	995.096	1175.5	896.887	830.301	1053.98	1285.41	930.495	1025.3	1302.28	843.295	991.942	971.234	1033.24	575.373	1116.47	822.371	982.558	808.909	1409.48	941.642	714.949
PIK3C2A	4959.21	6339.97	5859.95	5728.85	5959	4321.25	8456.92	5475.24	7320.37	7132.31	3052.93	5671.99	6443.64	6712.21	7871.43	4582.8	3738.6	7054.98	5794.7	5633.91	5132.47	5574.6	5388.57	5097.15	3926.94	6182.7	5174.69	4552.59	6091.16	5311.1	4352.64	5513.22	6531.33	2789.84	3942.36	3618.33	3242.23	3844.37	4805.18	5163.2	5475.02	3689.11	7046.07	5697.69	3644.72	4043.37	4468.91	4017.96	4232.57
PLAUR	1885.16	2396.81	5041.53	2838.63	2320.29	2363.84	7126.51	2795.91	1638.64	6254.14	2478.32	4156.35	7221.86	3633.94	28331.4	2945.94	4944.96	4159.92	4192.4	3795.08	3422.05	2913.85	3407.83	3478.16	7982.26	3868.12	6310.48	2725.74	2793.14	25055.7	3808.55	3609.14	1764.1	5141.69	4288.28	1968.04	1751.06	1947.39	1925.18	2211.4	3975.84	1124.98	2073.31	2704.14	4892.79	3871.89	4595.71	2923.65	5373.41
ANLN	55.8194	72.0896	220.763	220.235	97.1803	101.36	263.527	112.993	167.992	53.9163	74.6171	172.934	469.662	84.4315	219.237	95.0579	277.184	96.4412	485.671	79.9846	719.405	203.938	121.922	216.045	200.472	309.021	178.626	146.482	82.4259	293.805	113.245	92.833	201.808	540.943	157.367	692.164	177.208	1870.34	123.623	305.959	227.173	231.297	758.838	493.026	957.116	512.333	2195.6	966.907	938.504
WIZ	3310.49	3013.22	2709.21	2973.6	3227.96	2785.9	3476.75	2746.2	2892.66	3836.4	4072.68	2767.01	3731.12	2870.82	2788.69	2843.95	3099.77	3218.42	3090.1	2483.49	2571.25	2638.36	2432.45	3221.81	1816.78	2662.66	2332.56	2803.54	3390.43	3186.65	2764.97	2470.18	2934	3576.47	3731.34	2473.98	2738.05	2975.37	2895.47	3114.43	2840.23	2617.38	4522.88	2562.33	2686.52	3374.68	2792.03	4581.7	2812.78
RABGAP1	4402.5	4604.9	4522.85	4295	4899.05	4500.19	3797.64	3864.76	4789.04	3940.57	4392.91	3766.75	4229.31	4312.64	3772.62	4214.43	3810.9	4469.45	4115.7	4163.04	3678.59	3740.25	4081.4	3874.41	3404.88	4594.74	4005.26	4426	4147.17	3453.42	3841.06	3834.54	4160.71	3358.75	4027.82	3506.98	4211.5	2686.01	4249.98	4048.61	3827.57	4278.36	2820.73	3675.03	3045.02	3481.46	3184.62	2892.63	2540.26
DCN	78049.8	47290.6	94528.5	36519.2	68259	69220.4	68156.6	62008.3	52685.8	37594.5	66691.9	56626.7	65404.7	45774	56382.7	41523.4	37288.2	72520.6	37176.3	59033.9	48270.2	46296.6	69449.8	46792.4	46653.3	19942.3	41823	44562.9	38887	37340.5	71884.7	54536	66017.6	40221.7	65487.8	37273.1	49759	21450	45607.5	41592.9	56054.7	22222.5	13716.9	28685.4	27419.4	28497.7	19612.6	25509.8	24366.4
QPCTL	510.163	376.735	482.786	418.897	457.846	481.773	459.538	532.605	368.729	460.469	481.409	408.051	438.866	459.308	589.928	462.438	563.191	555.535	442.761	499.932	529.796	391.872	330.789	510.071	537.72	666.944	587.335	440.413	446.785	703.364	442.867	600.756	425.445	771.51	636.502	827.541	558.525	839.498	507.826	591.814	479.478	660.556	983.774	752.894	601.948	529.579	611.193	1054.12	690.019
PPP5C	3158.74	2599.92	3294.32	3032.64	2980.5	2832.05	2766.3	2795.93	2840.9	2583.31	4620.96	2844.74	3298.26	2666.66	2563.1	3035.06	3195.1	3030.62	3069.65	2748.37	3894.03	3426.33	3003.09	2860.53	3451.85	3019.82	3131.08	2998.89	3310.67	2512.77	3297.91	2961.88	3343.35	3040.33	3665.98	2625.66	4223.31	4581.09	2990.24	2590.82	2741.88	2355.88	3427.16	3535.11	3401.29	2983.19	2836.72	3275	3017.85
CEP68	2503.36	2595.51	1854.89	1700.93	2419.47	2302.99	1988.2	2386.33	1861.53	1237.22	1810.47	2364.79	2989.52	1938.6	2060.01	2246.84	1719.19	1937.82	2086.99	1817.48	2030.33	1853.58	2089.67	1696.94	1411.66	1609.18	1327.05	2512.36	1844.28	861.664	1827.21	1390.58	3366.32	1534.82	2536.18	2194.63	2338.9	1039.36	2631.76	2063.94	2381.71	2525.42	1870.11	1414.41	1606.6	2000.64	1280.15	2074.98	1896.44
MAP4K3	2293.88	2435.17	2099.88	1978.33	2080.84	2485.34	2001.96	2210.89	2142.56	2215.87	2017.72	2084	2942.33	1956.93	2031.42	2369.63	1961.34	2149.08	1946.91	2249.3	2372.41	1999.86	2010.72	2040.29	1885.68	2164.95	1672.72	1916.35	1910.44	1651.2	2182.82	2335.04	2964.32	1475.14	2356.88	1729	1804.14	1290.64	2038.47	2193.75	2114.86	1966.26	2385.33	2411	1624.32	1547.7	2047.48	1900.48	2041.46
ZBTB32	12.0656	14.1947	25.9876	34.6621	38.0706	27.0572	46.9766	53.3687	12.7076	32.5421	30.7309	40.8033	47.1735	11.0545	223.196	38.6178	38.3625	37.3632	36.8149	43.4318	11.1664	61.9024	17.9883	25.9597	51.1558	75.3177	44.13	12.6105	21.7112	90.6835	24.1124	26.1815	33.4917	11.8031	48.5254	46.0673	49.6457	198.062	72.1053	28.5874	41.0274	108.435	65.314	22.8183	35.4544	72.2653	214.149	19.6024	146.948
TYROBP	14078.9	17757.8	22440.1	27255.4	20042	15821.6	19153.1	29880.2	16163.2	18049.8	11425.3	17700	19280.6	16998.5	26091.6	23155.6	32994	30519.4	14970.9	16980.9	23803	21113.2	22996.4	15230.5	23622.1	16300.5	48984.5	21878.6	24101.8	51916.1	22667.6	19737.9	7954.3	25243.7	21775.7	13355.9	7617.9	11425.6	16721.8	12547.9	24303.4	10516	7510.53	7160.62	16982.1	12916.3	10404.9	9442.62	15057.9
TMEM159	1638.5	1055.45	1161.21	1101.15	1335.47	1477.92	904.186	1189.08	1214.96	695.804	1372.92	1087.18	998.698	972.842	840.969	1299.19	1521.93	1441.43	1103.32	1256.23	1027.41	1216.15	1715.91	1091.85	1299.93	3013.54	1423.69	1736.42	1053.09	783.748	1454.91	954.222	1165.81	2168.2	1415.39	5102.56	1602.28	862.316	1268.01	3031.78	1295.1	5359.59	2919.21	7683.26	3498.66	3838.44	2412.4	4001.86	2791.52
GABRA3	1.88408	0	0	0	0.000249046	0.0158824	0.018271	0	0.00739232	0	0.0123878	0	0	6.93175	0.0077279	0	0.0122814	0	0.00300104	3.56599	0.0140975	0.00881312	0	0	4.11968	0	0.00665445	0	5.62895	0.0221999	0	3.09003	0.0493823	0.074169	0	1.89962	28.404	391.6	0.0131088	0	0	0	53.9035	0	0.0463444	0.0342049	0	18.4464	0
BRCA1	439.409	488.997	426.252	443.273	416.77	365.848	497.325	482.875	465.91	453.034	329.001	498.415	421.389	535.124	460.721	552.552	479.919	381.633	418.219	370.456	605.287	387.595	308.803	420.422	386.331	403.712	330.983	390.674	373.373	406.024	282.229	364.386	397.838	616.968	303.122	376.316	415.662	1005.14	490.311	339.707	467.414	482.504	891.503	297.902	416.067	418.49	699.855	422.626	553.309
ERCC1	1768.82	1254.96	1707.72	1577.23	1270.35	1785.22	1993.91	1709.93	1181.17	2119.14	2276.48	1657.49	1767.78	1219.25	1858.77	1596.25	1675.35	1677.01	1773.08	1683.77	1563.86	1669.93	1974.74	1570.55	2683.36	1428.56	1858.68	1377.34	1585.08	1941.49	2046.35	1636.29	1527.3	1773.64	2022.68	1567.71	2322.41	1541.92	1419.42	1564.76	1673.15	2265.61	1776.82	2272.03	2412.09	1756.92	1405.31	1846.51	1768.02
CD22	336.976	853.305	1437.73	551.035	341.632	414.272	750.581	1616.93	737.426	306.952	300.51	242.876	511.104	897.186	1238.08	336.675	662.914	925.918	545.016	1118.35	984.023	657.726	281.82	419.496	158.731	1090.34	488.589	648.425	779.414	1150.62	416.855	399.676	322.496	1949.02	778.899	948.507	982.33	544.419	622.159	431.598	648.752	1489.84	453.031	681.5	638.464	981.448	467.293	625.876	702.948
SEMA3B	11581.1	14071.3	8386.99	9615.25	9868.22	12943.3	7968.84	7319	9327.71	17147.5	20966.5	7525.73	5624.29	10562.3	8954.94	13357.3	8611.21	7185.33	3758.85	10715.1	7764.8	8642.18	8231.76	13751.4	8616.07	4021.73	8658.8	6415.58	8933.27	9825.5	9756.33	9377.21	6948.14	6597.95	9789.6	1706.91	6544.46	1074.57	8524.66	10539.1	8019.64	737.919	1053.25	3756.88	4185.77	2065.39	5016.8	1884.45	2058.98
MBTPS2	805.264	1108.92	1082.25	943.712	1130.09	789.083	1037.07	936.794	1023.74	747.909	701.843	980.306	1285.58	976.866	973.344	883.286	942.323	1230.18	1351.78	1046.72	903	989.787	937.403	922.424	717.322	1297.06	746.009	931.491	998.723	1035.08	958.171	832.14	1077.19	1082.94	850.06	2244.57	932.804	812.83	758.129	917.248	912.298	1177.51	973.423	1200.25	858.657	1191.77	1710.22	924.439	1099.23
PRICKLE3	416.119	554.895	551.886	596.97	546.008	621.333	469.862	496.419	585.294	617.694	625.048	546.017	448.738	604.472	401.428	650.584	825.035	495.521	715.77	473.509	513.15	386.539	508.676	553.993	506.404	639.121	576.835	579.699	548.296	603.103	563.575	416.221	524.134	638.062	556.093	1062.76	598.651	510.157	577.865	562.31	592.346	898.005	950.598	632.96	780.061	656.829	733.969	1292.9	772.245
LTF	1580.74	915.577	455.815	739.383	549.015	865.661	744.937	1026.28	928.68	416.716	671.163	762.662	614.485	667.357	2456.12	711.972	627.897	661.519	11567.8	741.738	722.004	778.41	626.601	455.333	37512.3	7891.21	909.93	434.948	477.56	3414.39	708.381	606.891	903.219	11811.1	1686.74	645.116	16484.7	2546.07	54146.4	640.674	632.582	6125.01	2171.8	466.373	1226.03	753.927	5215.01	4071.98	759.272
EXTL3	2380.45	3407.81	2489.34	3073.88	3165.85	2925.47	3079.13	3224.56	2546.14	2735.88	3332.51	2830.16	4881.34	3347.73	3692.11	2994.46	3024.17	3283.62	3229.16	2797.78	3011.06	3069.72	3060.05	2899.08	2274.1	1475.1	2585.77	3131.84	3345.11	2790.11	2449.28	2427.68	3398.49	3434.8	3046.2	3978.37	2372.04	2104.45	2454.61	2831.14	2963.57	3350.26	2558.45	1967.43	2398.84	2086.95	3504.12	2651.47	2155.07
NR1H4	52.2298	23.1616	21.5339	9.34352	13.0247	31.4682	13.7973	22.6073	21.1325	9.27131	8.81684	42.7751	28.9729	27.1544	8.50053	23.7661	26.2816	12.9957	4.10211	28.9993	26.6367	6.44057	5.99586	18.8108	22.9695	6.4452	14.7243	61.6768	12.6549	2.45467	3.67563	7.79439	45.9734	16.4501	40.2667	7.65931	16.5929	7.58926	6.19639	30.3602	20.9094	1.64782	2.09244	3.78122	8.90553	4.35654	8.03081	0.062458	7.34973
ELOVL5	3571.13	4649.4	5457.01	5583.58	5217.63	4470.96	8140.66	4959.81	6475.19	8750.04	3891.8	4670.3	6489.27	6300.7	11465	4270.87	5590.33	7086.27	5734.37	5863.01	4770.4	5292.73	4626.06	6206.96	7873.68	3580.42	5682.17	4964.98	5683.32	11201.5	5194.76	7067.89	5026	4771.82	4144.17	7871.27	4079.36	11122.9	4235.58	4925.38	4496.46	5512.6	6103.79	8294.29	5463.76	5898.42	7947.83	6667.11	7086.01
ALOX5	5068.11	6041.54	10387.3	13009.7	10608.6	7099.26	8203.76	8952.99	7640.51	9743.52	5018	13417.3	7738.22	10140.4	10358.3	11514.4	19584.7	12468.6	3160.67	10434.9	9248.66	11690.5	12868.8	10514.4	7233.66	7335.01	20741.8	11247.7	16228.9	18964	14616.9	8144.19	4221.88	10015.2	10373.2	4499.64	2304.8	2213.89	6376.01	5674.09	11978.6	2432.4	2570.9	3483.69	11165.3	9221.28	5637.73	2152.01	5406.64
CALCOCO1	11315.8	10908.4	9726.8	8600.3	10287	9036.41	9654.49	9126.61	9735.51	10113.8	16597.8	8107.7	7526	9431.5	8200.84	10233.1	10049.9	12118.2	9308.13	12254.1	7595.97	9997.12	9055.24	9140.11	7700.38	5616.26	10204.4	11290.2	11923.1	8179.1	10043.2	8367.84	8327.24	8694.71	10283.6	4520.76	6897.58	5530.03	8632.83	9170.54	10804.2	7392.93	4020.13	6060.32	6251.54	7250.86	9426.44	4208.61	4549.4
UBR7	1627.31	1582.76	1783.12	1488.2	1509.79	1632.14	1527.54	1562.54	1481.2	1716.33	1958.48	1544.78	1723.68	1616.43	1555.87	1636.85	1692.88	1759.61	1517.44	1561.98	1433.91	1319.72	1436.09	1551.73	1486.83	1414.68	1459.43	1649.57	1475.42	1738.49	1719.52	1593.74	1608.56	1605.07	1564.51	1495.71	1518.42	1736.1	1530.66	1413.84	1475.68	1778.74	2242.27	1405.84	1572.32	1499.16	1533.75	2179.5	1925.99
MAP4K5	3433.38	3522.71	2985.61	2938.92	3223.95	2977.25	3322.06	2911.68	3051.13	3268.93	2273.24	3265.43	3738.72	3149.14	3558.67	2829.09	2499.34	2812.4	2948.99	3237.26	3563.06	3013.13	2922.14	3199.4	2976.78	2208.23	2940.91	2950.96	2878.36	2432.52	2814.17	3300.12	3357.86	1850.92	2650.03	2523.91	1968.26	1966.43	2826.45	3072.3	2746.76	2347.3	2817.61	2476.67	2102.31	2190.48	2590.47	3339.25	3468.67
EHD3	2903.72	2572.4	1516.58	1318.57	1455.69	2727.25	1667.32	1647.55	1778.06	1363.75	1764.39	1011.39	946.948	2370.94	973.359	2238.92	1451.83	872.799	1101.28	1829.45	1418.35	1787.36	1349.14	1187.76	813.386	545.846	1316.53	1256.15	1093.86	754.253	1017.58	878.513	917.665	1222.18	1160.87	508.797	956.372	1192.63	1374.08	2138.3	1889.38	573.659	764.018	583.456	695.999	671.941	742.061	981.813	813.8
PSMC4	2734.21	2492.14	3128.29	2725.25	2408.45	3011.02	3353	2585.24	2306.32	3740.58	3757.98	2679.57	2947.56	2854.07	3052.41	3143	3387.94	2749.8	3318.12	2990.26	3155.45	2724.85	3028.07	3116.02	3730.63	3660.6	3968.47	2733	2842.1	4383.36	3381.48	3573.69	2682.9	4743.69	3007.6	2703.42	3373.29	8031.43	2542.18	2670.05	2734.59	3066.35	8130.41	3340.92	4037.52	2860.26	2994.38	4956.12	3528.67
MAN2B2	4282.4	4403.58	4600.9	6467.34	4981.2	4025.21	5297.65	5039.39	4795.39	4962.92	4305.2	5599.13	5147.43	5169.09	5899.34	5737.41	7323.71	6671.59	4073.78	5810.22	4132.87	5051.42	6219.04	5553.45	3609.53	4483.55	5479.39	6415.63	5843.75	6374.45	5915.27	5243.27	4166.59	9003.73	5592.37	4450.68	3932.93	5049.37	4105.78	3809.11	6085.12	3488.68	3418.88	4314.65	4252.18	4875.98	5324	3633.3	4171.59
CLDN11	970.991	1451.89	1426.9	827.503	1081	1264.02	648.641	985.638	1082.89	573.945	1258.85	1504	699.755	1066.22	629.141	1102.13	669.506	762.415	299.615	1011.81	681.988	1284.45	823.476	968.157	443.77	200.946	945.628	723.476	729.54	441.492	845.825	1138.71	505.39	483.511	369.319	294.713	545.471	381.665	1146.41	999.237	752.869	206.364	89.1728	203.668	391.714	348.385	282.789	35.6798	321.435
SLC25A39	4571.94	3728.43	3732.23	4038.21	3502.47	4388.75	3437.83	3739.07	3140.95	3510.78	5754.84	3692.91	4183.66	3886.77	3762.03	4089.66	4746.62	4048.66	5558.49	3491.89	4767.04	4423.59	4201.33	3941.64	4838.44	5398.97	4837.41	3578.58	3790.08	5345.27	3843.84	3727.33	3587.33	5743.49	5489.3	4611.96	5131.34	7716.35	3640.21	4335.19	3857.31	4760.83	8870.59	4886.7	5978.27	4249.39	8020.15	8043.92	7029.66
MVP	10444.4	10120.1	11074.7	12689.1	10978.3	9654.38	10279	9245.96	11142.8	11176.1	16381.8	11034.1	8058.45	12141.3	10381.6	11900.6	17148.9	12530.3	17387.2	11381.9	8535.62	10661.3	11499.7	13906.5	10303.4	17135.1	12324.7	12824.9	15193.9	17689.4	16033.7	13405.7	7570.97	22416.5	10399	13960.7	15380.9	6891.11	8579.3	13065.6	11547.1	18344.2	22896.4	14237.5	18192.5	17398.6	17878.9	15496.5	22411.8
NUB1	4297.31	4155.98	4696.05	4402.77	4054.49	4199.65	3603.98	3652.26	4050.57	3729.4	4556.29	3756.06	3190.95	4042.29	3111.73	4169.87	4024.55	3811.32	3801.78	4598.27	3646.38	3577.96	4081.4	4162.17	3424.71	3676.09	4550.57	4252.36	4038.41	3600.94	4850.32	4015.66	3291.19	4586.81	3459.9	4995.02	3450.03	3513.13	3585.61	3898.49	4120.11	3671.05	4283.43	2782.19	3713.33	3864.34	2857.83	3556.36	3460.31
PGM3	1440.18	1253.18	1878.24	1583.79	1658.06	1430.67	2076.4	1270.45	1586.85	1774	1148.15	1549.64	1884.19	1577.35	1814.29	1454.65	1581.12	1445.74	1957.13	1575.61	1681.58	1601.6	1620.97	1573.24	2036.02	1722	1677.97	1249.82	1532.52	1893.09	1925.65	1915.3	1514.23	1367.43	1568.71	1625.32	1488.9	2009.28	1296.84	1444.2	1452.31	1410.59	3314.14	2312.01	1752.66	1633.97	2027.99	1909.65	1744.01
RWDD2A	372.376	364.28	367.917	467.649	377.698	631.402	232.681	324.606	367.664	306.038	318.031	355.588	328.56	370.794	208.674	400.054	391.176	379.904	433.554	384.099	376.532	422.819	447.715	403.394	386.327	308.068	463.352	419.628	355.251	247.916	745.618	428.91	309.331	257.629	324.915	346.557	344.82	420.692	312.116	486.458	352.957	472.201	668.628	376.913	404.991	328.975	391.736	344.541	324.206
CLK1	7726.95	9194.66	10086.7	6108.39	8563.81	7540.47	8733.14	8058.7	7865.53	8664.43	4320.57	7992.09	6165.16	7598.94	11621.8	6847.46	5395.31	9689.18	6374.48	8780.91	8530.03	9543.33	7651.13	6882.86	10990.4	5499.4	6741.28	6469.86	9199.73	7424.91	6753.66	7628.25	9108.16	1035	7460.18	6726.92	7062.83	5119.8	7469.91	7853.61	7066.03	8168.82	6083.04	10424.5	5737.03	6913.27	6018.18	3366.9	7237.53
POLR3B	546.456	623.471	629.954	665.377	682.26	592.094	544.353	634.773	670.873	755.372	614.101	587.791	657.954	547.804	559.233	709.997	736.318	479.853	827.227	730.747	689.74	613.953	732.534	693.84	525.203	1573.49	588.4	532.651	663.394	666.852	738.132	708.124	641.723	805.44	515.045	793.942	696.63	761.448	546.965	555.563	550.425	716.482	1101.94	609.163	582.029	737.712	413.65	1027.7	728.824
ANGEL1	1249.33	1930.14	1345.16	1931.49	1685.11	1831.37	1560.78	2213.63	2304.18	1497.7	1241.36	2221.97	1826.36	1610.04	1594	1842.82	1687.41	2056.95	1806.82	1572.19	1676.03	1798.05	1936.77	1701.44	885.432	1292.06	1972.16	2299.84	2009.25	2017.02	1595.1	1237.12	1730.51	2189.18	1751.32	1204.82	1155.96	3436.09	1718.12	1887.72	2094.75	1586.94	2427.82	1041.29	1312.3	1495.92	2226.37	2294.29	1456.72
RNF14	2613.2	2548.27	2795.37	2712.14	2334.31	2846.66	2372.1	2146.68	2353.85	2062.37	2503.5	2482.35	2390	2371.61	1677.68	2843.95	2466.45	2547.26	2390.69	2330.2	2887.76	2518.77	2523.39	2484.93	2273.05	2535.18	2911.48	2514.15	2560.26	2201.18	2307.23	2453.43	2231.39	2577.9	2443.97	2775.44	2297.66	2040.68	2490.66	2309.24	2313.11	2157.2	2101.29	1433.44	2416.54	2157.05	2429.51	2034.85	1988.79
DNASE1L1	716.822	932.554	842.637	918.413	794.467	970.275	915.607	902.438	960.345	706.049	736.925	851.087	886.921	1004.01	939.449	914.975	1016.82	1211.94	730.094	954.741	900.77	881.947	1003.36	799.609	645.278	814.798	1066.45	869.092	916.252	1155.42	782.685	745.25	637.452	1082.86	700.165	734.414	749.765	844.256	664.389	927.424	843.846	805.939	447.847	551.095	694.883	467.03	1838.02	496.128	799.028
DDX11	188.953	224.411	492.685	168.658	180.334	461.487	223.516	731.617	228.223	680.065	185.367	227.335	214.408	634.884	154.663	144.569	198.366	194.681	315.968	601.359	538.648	268.021	585.628	693.021	186.918	451.968	519.032	713.621	270.044	488.59	175.446	570.966	703.766	252.964	200.084	335.99	773.367	2563.35	207.057	630.606	202.996	576.253	717.365	698.638	350.802	409.871	2070.57	1150.55	745.45
HEBP1	3590.72	3089.82	2882.41	2366.31	2957.46	3228.24	2352.63	2888.18	2631.71	2422.38	4685.64	2839.88	2472.89	2679.43	1982.71	2736.01	3032.93	2883.7	3541.03	2858.26	2840.02	2449.38	3129.01	2788.82	2405.66	1766.89	2952.46	3178.87	2834.86	2608.36	3055.59	2490.49	2526.1	3871.46	3186.91	1801.96	1449.97	963.209	2486.55	2141.45	2968.4	1485.4	1865.98	1817.98	2533.83	1610.26	1694.67	3257.75	1761.54
GPRC5A	34786.2	40195.3	33129.8	33269.1	30690.7	28607.4	46059.6	20975.9	20770.5	56313.3	74557.6	23486.6	26835.6	40051.5	40456.6	37642.7	38835.3	34901	46664.4	39311.4	29069.9	31980.5	29659.1	49247.8	29209.2	20671.3	28058.9	37488.9	44013	56106.1	44027.9	39122.5	46372.7	36555	31769.4	11481.9	14336	5110.26	21383.8	26173.4	32196.3	13179.9	14139.9	43792	32964.9	23482.6	23058.2	26125.2	12704.2
MAMLD1	365.861	341.12	405.621	317.684	351.65	284.813	602.686	285.718	277.872	437.227	293.908	435.263	649.004	350.057	710.627	248.545	309.012	501.66	352.777	320.206	256.604	285.101	255.837	381.878	146.199	209.147	257.437	245.051	189.372	890.84	312.878	332.926	557.291	307.959	410.365	737.315	250.389	108.479	304.906	470.433	395.684	99.6958	503.813	516.843	208.069	347.308	619.398	726.831	607.83
CD6	1326.62	952.124	1642.25	1285.78	1128.08	1540.94	1239.91	1535.43	1481.19	1319.11	956.246	997.79	805.463	952.905	1814.27	2527.08	1044.23	1211.89	895.747	863.563	869.699	1696.6	984.373	968.13	947.027	1722.05	1234.57	1701.15	955.202	1255.79	890.378	1233.23	895.86	1647.18	1500.04	1032.01	1434.57	2452.84	1516.24	1520.1	1698.18	2078.98	1354.91	1151.7	1233.74	2205.55	1301.29	412.328	1962.96
TACC3	1059.42	899.572	1084.93	1228.61	914.689	925.284	1190.63	1325.64	1134.67	1018.62	1105.37	1137.7	1402.69	1074.94	2121.39	1113.02	1265.55	1041.49	1373.26	945.337	1764.83	1216.14	1182.25	1070.33	1050.39	1071.42	1406.88	1108.75	1129.22	1502.42	943.305	1164.83	988.731	1576.96	1371.03	951.369	786.429	4031.94	755.042	1090.07	1561.13	1130.17	1326.92	965.138	1587.8	1522.88	2685.64	1361.94	1940.78
UFL1	2255.7	2878.73	2553.06	3569.65	3043.62	2462.85	2509.61	2602.43	3406.1	1948.87	1605.43	2847.65	2883.69	2397.92	2250.66	2454.79	2696.55	2889.8	3450.03	2669.18	2887.77	2805.99	2878.17	2464.3	2372.24	2776.28	2857.9	2865.95	2762.36	2086.71	2554.2	2547.75	2926.7	2440.94	2271.41	3620.27	2747.49	2523.25	2765.69	2651.54	2924.86	3140.37	3655.21	3330.47	2900.06	2997.2	3682.94	2303.55	2793.38
POLA2	644.219	739.285	655.987	677.565	567.047	700.127	404.567	573.281	630.726	601.869	823.514	618.884	456.329	610.83	469.211	669.397	694.68	632.894	691.233	770.796	818.551	562.703	625.602	608.672	582.624	644.821	716.573	634.862	710.533	435.568	725.137	545.561	441.473	831.212	535.139	696.971	508.948	1255.46	638.639	616.264	581.849	657.97	444.738	507.309	844.243	761.446	840.446	601.761	635.512
ZC3H3	1081.76	1214.9	1082.24	1041.17	1204.22	1074.98	1089.8	1351.86	1179.04	1617.74	1701.86	1085.23	991.861	1098.07	1091.97	1212.04	1240.35	1382.31	1070.6	1021.14	1039.62	944.954	1127.28	1135.78	801.897	1350.15	1195.7	1210.04	1529.83	1458.75	1281.28	1127.88	993.086	1539.48	1133.17	1695.41	1062.68	1708.51	1137.18	1286.55	1264.54	1715.99	1731.2	906.127	1436.2	1325.51	1162.29	3017.62	897.846
CAPN1	10183.8	9251.64	10043.6	9329.41	9482.51	9779.31	9300.4	8866.18	9115.36	8755.59	14733.6	8233.03	8123.13	10062.3	8937.99	10575.7	12785.8	9831.73	10762.2	8781.73	8817.71	8795.94	10039.6	11708.4	9369.92	15645.2	9402.69	11914.2	10037.1	11619.4	10318.1	9680.42	7865.62	17053.5	9811.09	10765.7	12229.6	10346.2	9349.77	9194.02	10509.9	11315.1	6811.83	10450.2	15893.3	12706	15069.8	13593.7	10296
ACPP	151.713	260.054	163.277	366.429	314.581	193.656	209.761	180.809	395.121	708.928	108.614	232.195	246.385	383.585	461.765	216.857	588.337	312.086	1063.39	363.669	235.5	212.503	275.824	337.054	285.053	667.876	213.31	302.949	342.57	508.612	375.102	251.681	138.143	332.503	154.03	342.725	299.934	278.869	111.262	219.147	257.852	491.176	296.489	169.404	242.352	327.881	736.6	349.102	227.212
MDH1	4187.44	3657.17	5607.8	6155.27	4652.59	4589.12	4231.95	4129.7	4612.62	3479.15	4033.25	5129.86	4420.21	4094.9	4208.99	4455.06	6661.9	4975.42	4566.64	4220.09	5614.48	4580.55	5239.67	4636.38	5966.08	5338.46	7162.58	4590.58	5396.95	7076.65	4755.6	4023.18	3372.53	5458.99	5038.71	4409.39	5616.56	6194.4	4057.38	3648.91	4702.01	4091.64	4604.8	4565.93	5332.08	4581.56	5103.7	4615.1	4850.54
SLC30A9	3595.35	4057.11	4180.04	3993.23	4079.53	4165.88	3691.07	3433.43	4132.97	3679.17	3475.09	3665.71	3755.4	3811.82	3463.36	3500.47	4163.71	4308.61	4278.28	3973.12	4246.13	3583.3	4328.25	4045.64	4615	4637.25	4214.35	3789.31	3984.94	3482.92	3854.06	3840.05	3450.86	3605.79	3189.37	4698.37	4053.33	4080.42	3529.99	3731.56	3636.52	3836.2	5906.81	4322.27	2604.66	3905.32	4402.26	4574.87	3490.8
MTMR11	604.185	497.872	616.497	708.495	486.9	702.377	519.14	570.569	578.962	700.487	421.12	865.672	551.442	594.08	515.809	475.309	482.139	643.329	352.784	606.386	573.128	556.297	647.588	567.431	714.174	1598.05	777.509	541.701	702.376	509.906	689.852	658.203	477.745	819.497	655.771	526.081	1273.87	857.584	496.495	1012.6	596.366	225.279	1265.73	581.556	284.418	399.087	1786.81	501.867	2216.19
COX15	1365.71	1589.89	1374.79	1404.79	1367.53	1238.19	1226.18	1441.37	1465.35	1084.66	1394.86	1635.14	1412.54	1393.13	1179.88	1509.11	1701.63	1587.48	1543	1499.82	1335.05	1241.78	1478.06	1411.89	1043.09	1619.85	1518.26	1814.19	1558.81	1234.57	1651.75	1309.08	1549.01	1967.94	1335.02	1888.37	1709.66	1859.84	1229.89	1380.97	1503.91	1414.9	1233.62	1400.14	1494.86	1497	1351.68	1282.71	1623.92
CCDC88C	3488.3	4015.27	3007.14	3126.36	3679.79	3337.44	3019.55	2863.75	3564.58	2957.28	2464.05	2907.89	2827.37	3908.36	3398.74	3604.45	2753.54	3089.74	3115.66	2989.41	2587.91	3123.11	2989.1	3350.89	3988.52	4529.41	1953.27	3704.31	3749.32	1988.77	2721.32	2716.07	3714.96	3007.57	3368.62	2896.39	6916.36	9850.39	5275.91	3602.57	3411.65	5187.54	3729.86	5958.5	3852.73	5571.59	2897.67	6181.29	3426.14
YAF2	918.854	787.357	1142.4	700.979	819.513	862.229	908.731	786.684	921.257	936.769	706.222	840.4	980.508	909.888	936.271	778.321	863.43	923.27	753.612	862.746	974.065	734.61	823.476	856.988	1045.16	719.979	1184.12	636.649	841.93	829.731	950.75	1009.4	875.434	626.389	824.118	773.771	665.973	1118.38	854.947	843.915	752.724	434.301	659.321	907.09	929.448	746.357	931.471	686.74	878.463
ZMYND11	7158.15	7337.56	7105.54	5875.98	7096.1	7021.55	6245.34	5987.95	6650.57	6908.1	6461.07	6109.19	6558.48	6670.72	6431.03	6645.45	5630.88	6399.45	5141.31	6794.77	6876.23	5810.58	6697.74	6205.16	5448.21	5992.26	6307.34	6129.83	6198.09	4798.9	5837.26	6672.36	6937.84	5112.46	5978.49	5115.02	4334.36	3694.92	6441.93	6275.25	6082.7	4629.25	8423.78	4781.05	4356.18	5045.31	4424.17	5623.28	4806.21
WAS	1832.11	2280.17	1880.01	1893.05	2347.33	1741.35	2107.39	2658.51	2053.81	2287.5	2142.73	2093.72	2250.04	2174.64	4634.69	1990.37	2160.75	2742.02	2309.91	1690.56	1771.56	2078.87	1974.74	1697.83	1814.69	1222.57	2954.55	2069.19	2563.89	4190.89	2157.75	2388.67	1388.03	3584.54	2325.92	1228.82	1107.56	1772.27	2025.08	1789.9	2810.51	1485.43	1128.92	841.398	2258.29	1869.08	1207.79	899.197	1764.33
DPEP1	79.1123	3.50657	80.7377	37.4534	24.0454	6.82148	345.734	151.041	24.3309	7.40406	26.3719	17.472	546.496	13.442	345.139	19.7991	8.81842	67.7644	138.038	15.246	499.36	59.8203	9.99329	26.8354	20.9074	213.478	34.7001	10.7989	9.01103	14.2648	27.8143	44.7861	509.14	42.2431	987.171	185.274	252.675	679.681	32.9788	16.7759	67.5938	167.682	274.71	51.3715	206.931	55.049	332.495	209.022	531.235
BID	1601.23	1806.31	2114.24	2209.82	1712.16	1859.53	2015.71	1772.31	1610.1	2171.22	1583.49	2397.82	2284.29	2181.83	2727.24	2265.65	3027.42	1880.43	1934.64	1593.47	2339.09	1636.84	2138.64	2129.94	2808.67	1758.74	3416.84	1822.29	1785.37	3619.69	2053.76	2026.39	1524.46	2515.83	2150.82	1161.61	1327.17	1627.59	1466.8	1270.49	2277.66	1418.32	1629.62	1069.84	2086.82	1672.8	1825.56	2611.26	1619.29
MATR3	128.454	177.245	186.659	127.436	176.326	140.728	209.684	261.372	143.693	204.665	38.4351	195.286	114.02	191.399	201.228	152.494	96.4614	221.718	162.585	146.463	147.74	207.13	175.888	154.173	170.194	237.884	86.1797	151.015	167.656	148.741	129.038	192.233	240.842	15.3154	122.261	252.52	135.788	170.384	194.668	194.816	131.359	279.691	203.167	276.08	162.636	202.727	279.806	265.124	293.837
NPC1L1	22.3868	4.40232	6.24081	15.0012	12.0224	6.80029	21.6886	3.57006	5.30693	21.4352	21.8745	12.6289	2.15882	7.90953	13.7673	8.90948	1.14249	33.2304	5.12261	7.61545	2.27692	6.43265	37.977	7.13443	6.28213	16.3823	10.516	16.2973	9.03843	18.8177	15.7954	7.67039	8.83201	238.465	21.6874	7.65803	779.685	1875.53	28.8568	1.6084	20.8484	1.65084	157.536	14.2503	13.3377	2.19652	156.235	9.26945	41.536
XYLT2	1617.08	1435.79	1331.71	1469.46	1598.95	1537.58	1089.82	1371.74	1527.68	1046.52	2042.9	1371.85	1442.21	1397.12	1040.08	1419	1616.17	1462.28	1639.12	1383.12	1477.21	1589.84	1643.95	1614.49	1080.67	1788.23	1184.15	1787.96	1439.18	771.955	1597.89	1063.31	1476.44	1880.17	1520.12	2920.42	1749.82	1818.91	1632.64	1456	1439.41	2584.74	2704.61	1395.37	1823.48	1693.29	2109.27	3326.58	1835.46
RGPD5	12.079	7.07276	6.23042	18.7378	9.01745	15.7842	21.7662	24.4308	33.7727	23.2644	6.62675	9.70386	14.391	11.0888	37.0234	14.8512	8.80762	14.7475	17.3862	15.2973	22.2065	34.1244	14.9903	16.1161	24.0083	9.7315	12.6246	14.4455	5.38955	25.9233	17.6315	46.9808	52.9837	10.6258	8.29175	15.3388	9.53948	17.1063	11.3464	14.2484	3.1296	36.0458	6.23838	38.0457	21.0819	14.0629	7.2198	13.8592	12.8917
NUDCD3	4965.74	4848.94	4385.53	4960.38	4615.52	4509.2	3810.26	4690.35	4816.52	3991.73	6708.86	4445.88	4248.3	4670.69	3870.07	5111.58	5278.04	4678.09	4505.29	4509.68	4246.15	4550.65	5092.76	4908.02	3823.57	3844.43	4585.25	4982.19	4829.6	3911.35	5125.14	4074.91	4363.97	5377.03	5059.66	6325.62	4966.01	4185.11	4199.52	4576.35	4539.21	4138.1	4430.64	4654.46	4755.61	4097.31	6385.58	7044.85	4957.71
ISL1	1.85233	0	0	0	0.000451029	2.25841	0.0338967	2.71752	8.36222	0	0.0228021	0	0	0	0.0141363	1.97936	2.19808	5.31141	0.00545503	0	8.69971	0.0161448	3.99769	0	26.8177	0	0.0121552	0	0	0.0414022	1.84692	3.52396	1.53894	0.0736887	0	0	27.2152	1.87886	35.0272	3.28784	1.51318	22.3064	62.1838	7.58796	4.48394	2.19768	295.556	16.1491	47.1158
CHDH	467.31	800.713	774.424	1103.04	1254.32	729.429	424.066	936.798	955.066	646.507	473.767	713.12	764.415	775.879	630.202	1037.76	1874.68	892.83	503.097	849.96	635.347	950.281	907.423	1194.97	539.827	3643.16	1256.62	1376.49	945.25	891.104	977.672	464.441	643.271	2091.89	700.977	1952.72	1468.73	551.078	766.366	897.031	787.379	680.319	1249.16	935.644	890.729	987.933	1681.01	1213.76	1647.06
IL20RA	573.458	511.231	258.396	330.789	862.592	443.533	52.7942	116.593	850.459	150.662	179.894	430.393	586.435	570.94	460.74	692.173	523.774	863.315	580.803	1572.41	318.817	1578.01	577.632	417.704	1718.55	782.969	81.9834	425.021	2319.44	485.131	930.346	852.135	412.462	1119	450.575	326.395	1906.3	79.9246	1149.5	262.135	95.7991	240.773	512.107	318.846	299.896	145.644	319.37	91.9504	35.0602
CLCA1	0	0	0	0.93179	0.000284972	0.0182405	0.0209955	0	0.00847303	0	0.0142155	0	0	0	0.00885837	0	0.0140931	0	0.0034362	0	0.0161839	0.0101049	0	0	10.2702	15.9399	0.00762596	0	1.83261	0.0255333	0	0.0931639	1.42961	0.0747174	0.759477	0	0.0790723	412.478	2.0754	0	0	0	0.016092	1.87926	0.0466729	0.0344428	0	0.0649524	0
CLCA4	7.45174	3.52607	1.74914	0	1.00269	2.30298	0.0498826	3.58533	2.13684	1.8298	0.0332866	0	0	3.11501	0.0205072	2.96703	0.0329914	1.68018	4.09659	1.63655	4.47065	0.0234551	2.99785	0	124.48	15.7362	0.0176081	5.41066	0	4.76154	3.69084	3.94326	0.146993	2.42898	0	1.89943	106.327	9.50174	38.0726	3.29085	3.12254	13.7416	8.30733	1.87881	6.68573	0.0315742	0	0.0593078	1.80811
GLT8D1	2360.91	2110.05	2267.7	2040.19	2031.75	2465.08	1932.06	1899.82	2111.92	1674.45	2424.54	2200.59	2062.15	2120.42	1506.1	2287.44	2038.03	2102.13	1913.16	2114.73	2160.28	2107.7	2348.51	2151.45	2864	2260.59	2056.22	2046.58	1882.34	1529.65	2347.17	2024.54	2110.86	1814.63	2068.73	2322.3	3057.96	1819.85	2388.69	2006.56	2280.88	1764.96	2370.82	1780.87	1684.08	1542.31	1947.48	2628.49	1773.56
ATP2C1	5953.46	6982.14	8292.78	9364.1	8381.48	7334.49	7528.79	6439.16	8810.02	7614.16	4899.56	8908.28	7448.45	7949.03	7573.83	7718.87	10020.3	7346.19	7796.82	8227.3	7919.16	7949.22	9010.27	8447.17	7495.73	9116.74	8348.84	7315.45	8794.62	9709.81	7338.6	7626.4	6747.76	7937.34	6687.86	5582.55	5098.28	7943.83	5717.81	7881.35	7712.36	7022.16	6007.38	7441.43	5679.53	9675.36	8031.53	6485.69	6947.44
IGF1	531.557	674.24	968.305	337.347	775.432	562.839	1423.13	801.168	1051.18	390.678	406.873	447.88	2667.56	726.464	1127.95	356.479	310.134	346.818	1839.51	417.266	438.763	1476.6	533.66	573.696	570.1	531.992	317.336	311.961	452.202	475.702	565.417	791.299	926.138	318.525	477.326	672.003	1443.95	1137.41	817.868	596.007	694.676	589.994	516.268	738.606	514.558	509.098	1167.21	1126.5	561.599
SLC38A5	2294.86	1636.22	1359.54	986.81	1471.72	1763.8	1186.06	1592.4	1195.95	929.306	2860.88	1447.63	1198.02	936.947	1413.94	1246.7	1063.96	1178.85	775.09	1321.81	1115.15	1356.02	1483.06	1360.79	998.189	670.085	1107.45	1182	939.791	836.857	1503.19	1421.74	1646.21	1142.61	2185.34	719.047	781.672	1044.13	1178.38	1210.71	1422.59	567.631	1051.16	652.939	813.283	881.166	573.773	506.476	736.196
RALBP1	6671.26	5662.15	5677.78	5614.52	6127.31	5817.15	4791.17	5073.75	5506.4	5244.79	6853.62	5354.29	5488.21	5732.91	5424.86	6046.36	5891.64	5517.9	5223.11	5404.8	5387.92	4739.65	5581.45	5339.2	5096.34	5050.75	5822.96	5335.79	5241.05	5099.84	4922.72	5398.58	5230.66	6368.56	6206.32	4082.03	4559.85	8671.06	5349.05	4690.18	5242.06	3413.85	2567.79	4401.27	4373.88	4329.18	3695.06	3868.7	3711.57
RUFY3	2086.27	2534.91	2131.28	2878.96	3084.7	2009.24	2390.43	2914.42	3237.06	3615.01	1416.82	2354.1	2205.14	2126.78	2657.35	2086.42	2170.62	2341.21	2210.72	2783.32	2082.55	2851.89	2334.51	2182.82	2458.9	2682.31	2025.75	2648.91	2437	2260.18	2162.39	2390.59	2592.81	1296.03	2096.39	2770.65	1593.98	1929.32	2065.25	2773.85	2401.01	3962.77	1992.44	2921.19	1749.35	2698.44	2501.89	1894.74	2273.32
CNTN1	670.282	921	919.844	865.942	691.277	1109.79	811.313	707.118	1100.83	449.289	611.912	608.194	787.297	555.774	880.128	714.947	875.461	872.867	402.888	901.962	643.102	744.208	685.564	616.732	532.513	249.172	591.554	788.614	431.357	380.116	569.133	1016.57	608.368	257.646	402.793	419.515	658.861	8907.69	529.455	1055.61	812.416	228.72	111.979	220.799	308.759	200.648	275.449	1149.4	933.91
SLC11A1	4266.56	3846.87	5826.73	7147.7	7063.04	4250.35	7354.6	6465.39	6062.12	7868.13	3469.63	4562.46	6394.14	6645.97	12136.5	7232.66	9979.72	10450.8	3985.85	6270.95	5944.39	8165.97	7722.09	8100.25	6883.87	4235.06	15000.8	6071.03	12551.2	22074.8	7987.6	5088.18	2664.17	8216.85	6956.11	1778.91	857.282	1020.32	5390.23	2830.29	9014.4	657.927	1168.32	1902.7	4845.17	1970.48	3997.52	1497.47	3858.48
WWTR1	10045.1	9842.19	8805.18	8270.42	8818.28	8651.44	13339.7	6662.51	7879.27	11445.9	10528.3	7930.88	11833.8	10436.3	11838.9	9360.67	7204.32	9210.14	9102.6	8247.73	9122.03	7004.3	7605.16	8299.24	7536.45	3756.93	7615.46	8089.6	8830.86	9520.99	6815.86	9905.86	9514.68	6360.42	8456.84	3178.63	4955.41	2784.03	7786.14	7793.69	8438.59	5210.7	3812.8	6224.04	3981.11	5397.99	6083.17	5437.28	4184.52
AGPS	2880.37	3316.04	5039.76	5132.83	3816.05	3445.51	3904.2	4025.73	4025.21	3539.62	2130.7	4885.03	4108.37	3911.51	3489.84	4010.44	5147.63	4872.85	3755.77	3399.91	4063.99	3236.29	4035.43	3696.91	2980.97	4826.86	4946.67	3634.66	3906.09	6137.17	3394.46	3152.42	3204.09	6048.92	3477.51	4259.64	3270.55	3614.03	3004.66	3328.55	4241.04	2605.32	3391.92	3010.64	3175.59	3471.76	3456.91	2760.59	3388.27
CXorf56	1621.73	1531.99	1749.91	1529.44	1547.86	1649.02	1341.91	1437.75	1553.04	1351.65	2321.43	1586.56	1427.74	1537.48	1231.78	1633.88	1765.19	1484.87	1242.38	1473.4	1769.31	1520.45	1607.98	1398.43	1564.09	1151.49	1769.37	1554.61	1460.92	1325.45	1413.12	1952.2	1406.8	1777.13	1570.39	2133.19	1555	1394.4	1437.96	1569.84	1389.45	1236.84	1573.64	1548.63	1461.67	1330.91	1020.02	1340.12	1436.4
ATP1A2	672.16	542.423	790.633	477.001	385.713	398.505	696.705	722.517	1022.64	229.739	643.688	518.812	515.7	644.357	362.243	377.275	210.426	1076.39	212.699	914.793	601.99	671.592	681.566	650.824	668.231	258.173	673.491	675.577	385.142	132.289	615.575	403.296	393.563	530.286	451.451	308.158	1093	217.945	1026.91	401.309	581.178	262.294	156.552	224.613	411.61	265.342	160.032	241.202	173.626
TTC27	768.962	779.344	848.027	852.811	932.722	853.219	774.67	856.322	863.151	855.834	796.13	834.572	838.24	743.195	658.793	758.517	880.955	795.461	749.521	848.272	876.331	789.058	998.365	834.579	863.487	940.693	801.687	817.543	851.905	642.099	817.044	861.584	930.552	766.852	903.699	1013.79	898.533	1011.78	829.196	715.75	730.962	911.729	1008.66	888.053	1022.38	805.67	760.755	854.372	628.116
ZNF582	294.2	252.074	256.662	167.735	201.372	271.253	178.798	209.776	213.415	211.162	155.744	261.354	270.833	173.796	184.3	279.247	197.243	193.848	140.095	236.77	284.312	196.472	229.854	173.885	234.927	171.582	299.435	188.091	154.04	101.586	206.111	262.438	246.776	114.794	199.334	173.759	129.935	85.6402	237.937	176.189	172.45	65.2964	110.936	302.707	175.942	131.604	153.581	152.76	139.463
VSIG2	4191.18	3502.21	2948.8	3091.68	3323.14	4007.16	2490.16	2450.49	3752.64	3513.58	7099.18	2293.85	1558.49	3399.53	2156.41	3672.77	4111.1	2924.54	2604.4	3008.98	3346.5	3345.19	4048.42	3524.8	3735.85	9151.34	3551.36	3794.74	3930.57	2154.01	4035.12	3418.53	2064.55	6799.19	3411.39	1282.58	9135.77	337.866	2104.4	2185.29	2930.51	2123.65	1013.86	3172.46	3278.45	1860.47	1325.63	1279.29	935.708
PHLDB1	6057.74	8272.8	7672.7	5367.1	5870.84	6002.89	9159.38	6567.58	6277.64	10222.7	6195.7	5713.77	7640.19	7327.84	8591.63	5649.28	4741.17	7402.72	4633.11	7051.13	6744.06	6007.03	5660.4	6911.56	3757.8	4071.61	5517.22	4838.37	5563.68	7273.81	4917.14	6526.32	5638.62	3651.45	5377.13	5954.1	4352.04	4490.65	5042.09	6260.95	6272.15	4177.68	2277.53	8000.2	4963.61	4748.71	8146.28	7556.95	6371.06
MARCO	8910.17	9503.67	29406.6	24131.8	24607.4	9304.35	13421.2	18231.5	21363.2	10903.5	10401.1	21439.5	16924.1	14800.7	14759	30725.9	44679.7	31980.8	6652.62	27220	23952.9	11141.8	38127.7	12169.2	17518.2	14822.1	60643	30302.8	37890.1	76921.7	45670.4	9433.01	5971.24	34149.9	19888.8	7734.93	3298.94	4024.24	15932.8	5038.34	22273.4	2665.5	2436.14	1461.99	13680.3	8119.08	11890.9	2672.2	5795.52
CYP24A1	3.6865	1.72461	0	3.71465	2.00467	9.06651	9.23861	8.99518	2.14251	1.82422	15.3861	1.9283	43.5075	22.2985	0.0248872	11.8785	6.62449	0	2.05684	28.9686	11.1568	41.6044	14.9902	1.73907	229.298	175.291	0.0213477	2.662	39.9218	23.6241	34.3727	38.4716	11.8103	48.09	3.27443	75.82	599.863	337.868	223.538	264.647	3.13344	251.942	44.5954	355.008	96.3228	14.0593	4537.08	106.877	83.094
PRDM11	1448.56	1871.36	1239.27	1391.67	1931.57	1408.16	2157.75	1856.44	2091.83	1780.52	1317.02	1370.87	1633.15	1775.15	1968.91	1631.9	1126.42	1709.19	1083.89	1609.68	1484.99	1746.8	1725.9	1576.83	1266.53	717.482	1062.27	1465.98	2339.17	1024.51	1371.33	1303.59	1604.19	1195.24	1300.78	699.85	1113.36	327.399	1678.96	1322.89	1788.64	1073.47	1323.78	1284.04	999.136	915.664	974.58	757.915	614.262
SYT13	72.612	147.967	5.32846	28.0835	116.214	116.993	22.9958	3.56649	25.3847	55.7989	105.234	61.2035	8.99323	49.3798	19.0967	23.7605	4.434	39.9387	2.05642	102.255	97.7081	45.9355	11.992	16.0781	114.83	861.429	8.43391	36.1332	12.6351	4.81774	9.24445	22.6332	19.119	4390.22	6.61953	24.9388	1248.73	1471.66	238.982	87.5938	34.5477	13.689	587.762	5.68724	59.8105	8.66787	570.684	46.0172	35.0592
SNAI2	594.869	747.293	502.507	644.757	1090.01	979.242	695.592	718.877	637.069	446.499	738.002	580.018	1083.3	556.576	500.986	617.904	695.784	506.806	1664.66	382.345	643.1	872.322	1134.28	586.251	381.122	221.383	449.716	627.619	505.68	624.376	596.062	353.503	1300.4	811.268	688.468	332.152	514.826	475.893	1201.02	779.047	792.297	287.219	271.62	251.259	285.521	206.04	479.513	1142.47	459.999
CD74	172133	179520	247644	266597	219764	178328	197349	214355	200350	165348	183093	199120	172805	166485	212849	235619	317002	280594	175462	227808	145295	216697	209498	203223	151348	195780	307345	318024	299339	419230	338117	262090	151467	384044	234218	324306	111763	133642	163053	185244	245309	212323	285391	520653	387199	255728	220071	202022	212970
HGF	2098.39	1926.58	2326.06	1106.76	1585.93	1613.01	2178.39	2128.63	1543.53	1827.03	1713.96	1874.15	3204.13	1515.13	2199.8	1409.1	1179.02	1481.39	1561.41	1734.88	1579.4	1272.75	1133.28	1519.45	1066.06	1193.17	953.003	1965.21	969.689	1704.28	1193.99	1747.16	3210.88	1355.71	1794.04	1784.69	996.575	2664.15	1207.23	1875.91	2031.07	663.096	613.715	1397.28	1071.1	1243.55	1076.92	901.489	892.299
ZRANB1	1078.04	1284.38	1296.72	1210.8	1307.41	1206.67	1589.38	1163.76	1391.39	1398.18	1051.64	1169.76	1593.64	1433.84	1473.24	1235.81	1011.36	1427.52	1153.42	1351.63	1252.86	1127.53	1030.34	1161.77	1417.91	947.991	1013.93	1140.4	1150.97	1370.26	1238.57	1255.4	1273.2	976.378	1108.09	834.255	971.725	1032.72	1005.33	1129.77	1172.71	1216.26	751.58	1161.24	871.915	912.437	760.754	939.337	831.35
NCDN	1302.4	1185.5	1127.1	1227.67	1206.23	1134.64	1778.46	1279.51	1053.33	1330.26	1718.33	1271.77	1555.58	1302.22	1318.62	1310.08	1334.59	1072.77	1950.99	1112.27	1117.37	1516.17	1248.21	1224.52	1282.18	2447.05	1048.61	1325.8	1347.64	1487.1	1383.41	1218.51	1604.13	1504.4	1634.04	2353.03	1556.2	1801.78	1349.38	1433.23	1357.2	1878.53	4008.68	2210.16	1795.81	2178.6	1996.28	3640.04	2034.07
ADGRA2	6739.22	7004.45	5468.69	3755.18	5815.74	6538.65	6224.7	5986.15	4435.14	3945.21	6083.83	6692.14	11904.7	6908.4	6990.24	4755.1	3771.47	4103.4	5995.12	5926.9	7962.43	5705.93	4666.03	5314.1	2909.98	2371.65	3881.29	4345.49	4497.88	3016.77	4357.28	4280.2	7904.55	4905.17	7513.9	2772.55	4513.74	3280.9	5440.71	6437.24	4651.32	1633.34	1292.72	2684.16	2986.38	3423.22	4737.2	4470.35	4572.53
ZFP64	789.46	690.284	706.244	735.671	672.241	747.4	516.853	522.634	756.44	490.226	858.605	753.935	568.933	562.962	455.445	634.738	646.479	564.196	734.179	582.528	640.875	643.846	742.528	749.429	507.453	1041.3	604.159	808.52	605.386	400.172	792.918	431.075	773.744	1105.13	708.527	859.218	950.468	1500.08	716.923	676.966	752.732	949.585	1031.46	980.387	866.379	774.393	842.056	1166.66	769.458
MNAT1	691.7	607.438	800.483	522.919	689.273	673.123	673.817	494.599	543.046	551.628	627.257	581.962	648.067	574.927	682.082	570.372	665.104	638.105	706.572	676.231	759.7	597.938	603.616	611.358	1367.75	693.862	662.994	565.213	614.45	585.431	765.99	671.174	603.992	386.415	638.168	572.162	1134.61	887.086	639.67	626.378	448.839	975.399	1106.1	651.04	638.465	743.115	646.952	1030.03	569.92
SAMD4A	2752.83	3390.87	3427.13	3665.23	2845.25	2516.9	4635.25	2994.87	2495.43	10230.2	2871.97	2437.65	5998.05	3287.9	3667.76	3173.7	2135.58	3028.01	2142.22	2621.46	2726.75	2650.11	2030.71	2313.68	4268.34	1010.05	2570.02	2146.95	2565.68	7162.68	2498.49	4148.59	2569.69	2627.03	2397.93	2354.95	1292.93	1008.9	1985.94	2530.17	3161.1	801.577	1562.24	2931.66	1370.95	1681.43	3464.36	3503.42	2308.43
RUNX3	2558.27	2405.76	2772.94	2100.16	2646.89	3542.24	2631.06	1997.47	2427.81	2617.75	1649.29	2091.77	1980.73	2443.4	4899.47	3253.91	1931.76	3394.08	2333.42	2148.79	1632.74	2168.56	1963.75	1904.91	1563.06	1331.27	2136.08	2146.06	1875.09	3301.08	1634.08	2952.42	1494	2910.32	2350.18	1819.24	1833.65	2304.34	2792.46	2762.04	2728.25	2188.19	1669.01	1416.31	1803.57	2578.73	1859.71	1003.7	2331.52
MRE11A	1312.64	1535.56	1206.07	1331.7	1577.91	1231.44	1035.96	1416.06	1990.4	1045.59	1145.95	1928.56	1361.58	1591.74	1354.63	1312.06	1115.46	1359.69	1222.95	1342.25	1446.11	1332.53	1411.1	1405.61	1009.67	1520.14	1192.55	1480.46	1215.32	1017.42	1065.86	1637.96	1778.29	977.581	1206.9	1757.82	1030.79	1761.82	1457.52	1631.44	1381.44	1661.82	1035.62	1629.55	1365.38	1529.33	1495.61	1102.41	1477.06
PLEKHB1	1824.68	1332.45	1521.96	1697.19	1407.6	1400.29	1330.47	928.626	1343.86	1423.28	2490.31	1044.42	908.895	1296.61	1061.27	2102.27	2181.55	1224.04	2556.33	1907.78	1268.43	1081.63	2196.6	2018.79	4429.08	1356.63	1672.71	2360.44	2589.3	1629.93	1515.25	1599.33	1853.87	2380.01	1556.14	2097.66	6207.68	3673.09	2459.75	1194.62	1712.66	1474.24	4417.11	3485.65	1428.48	1459.26	3586.32	1054.21	897.839
SERPINB1	7056.65	9338.03	10749.8	8202	6567.13	8527.65	12384.1	6085.58	5998.74	32223.4	8670.7	6925.3	8937.05	9622.87	20553.4	8558.58	9304.8	7582.63	8569.86	13811	10397.1	7745.31	6912.6	8109.18	25502.5	10878.8	13017.1	6465.32	8556.24	24685.7	8354.33	11773.2	4953.54	9709.81	6825.18	4941.24	7904.78	8377.85	5530.35	8212.65	7584.96	8048.28	9552.71	6653.3	11600.2	8449.12	10014	4158.11	5413.08
SLC7A9	9.29228	5.29619	0.847288	7.47563	4.00828	10.1559	13.749	17.2046	16.891	6.48461	4.43116	13.6021	5.98632	20.0279	12.7125	17.827	6.61088	12.1603	12.2721	11.909	8.91535	21.318	0	28.8016	5.23993	56.1973	8.4206	3.5705	14.5068	4.80224	9.26663	0.309549	28.5493	26.9517	8.28921	11.5007	49.4938	362.31	10.3157	3.28733	20.8965	19.737	26.9583	19.9729	19.951	9.74691	21.0775	2.37429	13.8216
SPAST	1189.76	1260.32	1495.06	1169.56	1171.16	1251.69	1142.52	1249.67	1217.08	1304.22	951.861	1515.64	1479.52	1279.1	1552.68	1197.19	1241.45	1458.81	1184.1	1175.31	1320.61	1138.21	1252.2	1194.94	1259.21	1471.93	1427.9	1274.25	1154.59	1406.84	1170.79	1198.14	1444.46	1212.89	1145.73	1624.36	1272.83	1811.3	1242.25	1187.05	1206.49	1229.1	1591.26	1529.59	1462.76	1291	1325.68	1222.99	1336.64
NRXN3	380.741	1601.69	420.85	880.964	776.433	482.906	688.678	321.877	499.725	364.638	392.605	391.532	260.799	631.603	468.145	291.124	345.183	441.613	857.895	755.493	285.493	529.598	749.523	463.441	732.959	348.913	629.363	260.415	628.971	207.815	381.578	593.447	376.143	385.208	336.641	397.441	749.673	3453.5	831.234	736.927	506.941	390.465	1623.31	378.816	318.702	297.702	338.07	1279	444.305
OSBPL5	2642.06	2786.1	2497.43	2341.95	2905.36	2793.76	2255.21	2107.8	2715.16	2073.53	3193.23	2399.76	2445.53	2860.49	2560.97	2753.84	2233.07	2963.71	2078.82	2699	2152.52	2418.41	2087.67	2017.87	2042.3	1309.2	2065.68	2369.45	2431.56	1798.74	2897.75	2314.8	2610.23	1919.95	2504.33	895.687	3057.89	851.85	2485.5	2279.78	2289.8	1531.02	1752.98	1477.23	2178.63	1352.48	1526.44	1093.25	1716.3
AQR	2263.15	2860.92	2451.66	2878.02	2747.07	2319.9	2552	2610.57	2690.87	2729.38	2073.66	2631.97	2795.46	2559.02	2630.88	2560.74	2526.72	2760.26	2886.61	2526.95	2485.72	2264.66	2292.54	2406.93	2118.52	3117.12	2525.88	2591.02	2496.81	2499.77	2403.79	2416.5	2751.05	2529.9	2179.29	2353.02	2230.36	2554.66	2334.1	2555.44	2629.07	2685.35	1698.04	3715.02	2027.08	2601.39	2488.04	2228.9	2029.44
CPS1	204.835	163.896	139.985	113.381	116.215	112.591	135.236	227.92	145.797	74.3905	196.26	124.355	186.417	96.4257	140.869	117.836	83.3117	126.038	145.201	187.405	137.735	132.407	110.929	132.66	75.1955	84.1084	111.386	159.173	109.637	61.4601	213.577	217.789	205.987	128.873	145.645	88.2995	96.9204	27302.5	123.623	85.9064	119.174	58.4095	47.7065	66.6007	73.0881	82.0125	238.072	110.322	67.3892
C8B	578.117	630.606	170.447	363.593	852.574	335.485	108.948	657.39	279.996	742.354	615.19	223.445	194.601	760.801	1177.7	494.124	1044.16	195.538	6.14609	1552	737.481	737.792	341.782	550.398	845.724	381.599	562.131	241.418	899.07	2507.42	307.29	418.115	622.825	466.881	657.88	148.793	15.4489	45.6597	659.158	207.401	346.7	6.80841	45.6332	7.58944	309.76	59.3614	94.2012	129.81	36.9059
FHL1	28968.7	18492.6	23613.9	18843.4	20180.3	21335.9	22419	15085.6	15213.4	18687	35638.8	20936.2	17802.7	21375	18577.1	17870.7	17713.3	19627	5629.06	27382.7	17850.9	16928.8	22502.7	19746.8	18566.5	4971.4	21976.4	16055.3	18252.6	18409.4	22541.3	22686.6	18341.3	16430.7	18071.2	4717.56	9580.14	2869.69	17384.1	15756.1	17634.9	3001.81	826.229	10695.8	9201.39	9495.27	5468.61	3201.57	2919.9
RTFDC1	4112.98	3522.69	4119.02	3881.71	3658.76	3884.49	3524.91	3369.23	3210.67	3623.35	5126.5	3715.26	3481.55	3562.21	4162.37	3852.01	3933.61	3639.18	3400.95	3751.67	4160.61	3465.85	4457.16	3742.63	4247.47	2934.79	4712.37	3796.55	3577.1	4469.55	4064.83	3904.73	3336.17	4322.22	3869.5	3340.89	3649.54	4119.45	3364.15	3346.26	3484.19	2844.44	3663.52	3811.14	3643.61	3189.19	3692.64	4332.58	3209.06
NLRP2	463.6	615.467	174.037	498.556	557.029	581.95	166.241	469.284	383.524	192.526	766.491	352.667	422.098	381.112	276.46	642.661	300.268	410.302	1718.84	353.393	466.513	447.396	461.706	424.882	400.956	2515.41	210.166	592.357	1219.96	688.065	1018.57	418.093	572.028	153.46	661.636	268.786	203.181	210.324	374.952	443.409	243.298	1272.22	160.701	44.71	1105.33	346.242	1415.26	152.811	208.722
SLC45A4	973.752	1796.52	1204.26	2237	1877.47	1435.19	1514.96	2575.34	1868.93	1773.99	2013.33	1951.87	2499.61	2184.24	2653.1	1704.19	1949.28	2253.43	1849.77	1628.4	1775.99	2122.64	1622.97	1844.87	2234.41	2683.18	1724.2	2067.39	1733.71	1973.37	1873.64	1728.77	1396.7	2542.73	1555.3	3144.11	2144.14	2825	1716.07	1582.47	1927.06	2355.93	2881.87	2223.48	2732.95	2454.7	1880.85	4381.8	1320
RNF10	7894.53	7277.86	7042.71	7032.43	7392.65	7074.47	7976.83	6382.2	6028.31	8772.35	10511.8	6393.86	6991.28	7806.3	8959.16	7673.32	7565.89	7447.04	7401.1	6966.79	6473.07	6106.34	6460.89	7739.87	6924.59	6163.05	7508.28	7122.83	7589.25	9523.32	7316.32	8042.29	6615.64	9204.03	7829.46	7188.68	5987.33	9744.67	6573.78	6795.4	6682.29	7645.77	7215.07	6127.89	6299.15	7408.34	5714.92	10364.6	6736.82
ZNF839	339.789	412.393	387.667	377.67	338.626	383.841	372.441	411.435	369.775	339.533	424.374	369.192	323.237	332.503	333.636	444.615	438.278	394.691	350.732	426.702	338.776	420.682	358.772	412.364	370.666	442.979	343.586	397.016	382.447	292.747	393.667	251.729	345.58	291.566	348.379	450.249	415.631	345.495	339.925	429.964	368.284	678.703	642.71	400.713	326.441	342.99	686.099	686.632	546.862
ZDHHC6	2011.8	2065.51	2221.04	2129.22	1926.56	2125.16	1847.27	2095.15	2201.72	2123.78	1743.59	1957.7	1722.86	1858.04	1849.25	2057.7	2095.01	1952.6	2154.48	2345.56	2129.18	2334.05	2033.71	2036.71	2321.07	2316.17	2410.3	2006.79	2074.49	2104.38	1920.06	1782.41	2132.62	1730.34	2008.43	1784.68	1654.2	2026.4	1697.53	2229.16	1826.29	2183.88	1824.51	2254.89	2027.06	2039.49	1429.69	1437.74	2237.29
GRAMD1B	268.084	369.601	497.137	477.002	517.957	297.215	752.84	855.465	534.587	358.125	263.225	580.023	734.861	523.904	457.557	430.749	692.475	1007.7	416.178	417.286	437.636	505.045	413.737	343.298	180.656	1535.17	729.173	608.644	693.324	997.176	502.29	266.623	412.422	1596.45	484.929	365.759	1787.08	393.087	412.027	426.581	698.031	396.49	399.118	293.146	497.918	485.34	642.167	233.177	308.5
RNH1	14154.3	13636.5	7896.09	13789.4	12454	14092.6	13729.4	14114.5	11752.3	15166	22822	12631.3	12977	13717	11852.7	14993.1	17416.3	15327.9	11141.5	14125.2	13833.5	14414.3	14160	15140	13665.4	9714.92	17753.6	14416.6	13754.7	20543.2	17160.9	13995.5	9465.47	18635.1	15308.1	9709.71	5704	8983.2	10819.6	11343.1	14983.9	9633.53	15844.1	9777.23	15517.1	11185.3	9577.48	11883.9	10897.4
NDUFS1	4477.91	4861.41	4633.22	5188.11	5032.29	4182.79	4398.11	4840.46	4222.78	4853.16	4631.97	4960.81	5343.71	5316.65	4221.7	4253.05	5431.44	5120.61	4660.71	4474.75	4403.86	4063.78	4638.05	4682.11	4181.7	6029.91	4250.08	4844.72	4297.6	4678.48	4070.39	4899.36	4604.95	5166.3	4101.48	4170.35	5614.17	6045.93	4615.66	4403.52	4554.54	3208.27	4256.48	5785.25	4859.61	4797.25	5020.82	3849.18	4358.2
RB1CC1	4326.17	4634.3	3819.28	3951.99	4513.33	3803.45	4489.76	3503.06	5356.36	3810.33	3565	3860.99	4219.43	4606.92	4462.11	3642.08	3131.57	4062.57	3535.93	4111.09	3862.96	3519.24	3958.48	3345.5	4326.82	4007.1	3512.49	3732.33	3857.15	3518.33	3517.02	4082.2	4414.72	3006.39	3418.05	3279.45	3216.23	5817.51	4333.41	3573.92	4262.01	3232.39	2760.6	3619.82	3082.64	2435.32	2211.63	3185.44	2684.37
ERP44	2958.57	3497.75	3926.08	4191.92	3599.65	3340.83	3689.91	3003.91	3649.1	3155.43	2755.74	3662.8	3915.92	3459.34	3432.64	3104.38	4164.79	3658.31	4264.99	3635.85	3798.53	3421	3755.61	3575	3198.14	3756.2	4789.07	3429.37	3530.89	4716.2	3782.57	3634.81	3138.74	4211.02	3278.99	3074.96	3158.4	3287.55	2881.06	3527.52	3755	2870.24	2998	2882.14	3312.79	3348.81	3682.07	2711.22	2724.08
ALAS1	3069.35	3813.05	3769.92	4618.32	3197.91	3767.43	2723.93	3425.29	3120.87	5085.74	3959.77	3411.16	4069.56	3728.88	3577.75	3771.8	7411.32	3328.8	2466.36	4372.57	3546.42	4541.04	3972.47	4761.91	3505.11	6040.57	4609.4	4509.2	3604.29	5008.91	5054.59	3930.64	3000.87	3638.56	4132.49	3836.26	2578.7	2733.59	2475.22	3255.19	4324.85	2349.84	2625.84	3776.87	4371.65	3869.73	3367.49	2772.07	2260.36
BIRC3	3529.24	2697.87	5004.74	3990.41	5590.32	2658.74	11400.7	2933.36	3523.39	9913.84	1752.39	3828.93	3934.12	3358.82	19935.8	1656.65	2090.66	3871.29	2964.34	5541.94	2551.28	4602.98	4767.97	3215.5	6912.05	5063.84	4558.98	2436.34	5106.93	13522.9	2109.44	3476.01	2516.06	3896.15	3004.24	6410.1	2854.99	2942.03	4763.99	2903.58	4198.26	6719.42	3256.13	7071.18	3450.01	7138.7	4189.24	1494.04	5033.44
AKAP11	5483.35	7136.28	5422.92	6615.41	6203.45	4735.46	5012.32	6450.95	7862.34	4908.97	4511.36	6249.11	5791.74	5956.21	5305.18	5844.36	4348.9	5489.22	4929.64	5128.85	4658.22	4890.19	4590.08	5406.43	2588.39	5210.95	4355.15	5563.7	5125.05	3716.63	3788.12	4679.47	5952.1	4022.54	4238.86	3377.37	4744.01	3058.16	5541.66	5763.51	5478.24	4477.02	2947.2	4841.98	3525.23	4946.07	3106.56	2470.08	3831.66
GLRX2	353.753	329.534	467.55	329.867	427.79	401.849	448.052	343.599	387.735	362.791	387.102	390.567	298.878	351.645	310.339	434.712	448.141	359.901	288.361	350.019	428.722	338.482	450.713	328.076	444.792	428.255	550.55	309.271	333.495	603.024	354.663	419.69	323.837	504.585	386.907	543.375	524.235	481.612	375.977	429.952	368.272	473.058	385.643	324.558	340.828	372.111	265.711	489.197	357.463
SNAPC1	719.622	760.644	927.912	568.837	838.548	746.292	924.753	617.581	680.386	685.589	652.486	699.522	889.236	807.816	1342.94	592.157	539.121	822.424	719.867	844.876	773.042	665.207	751.522	509.142	1449.2	574.493	777.519	555.255	641.631	824.991	680.554	848.593	863.771	406.314	645.707	632.646	1068.51	563.456	915.716	696.366	676.159	688.075	937.13	578.698	670.549	856.351	988.401	1023.14	800.871
DERA	2058.34	2152.81	2389.76	2245.43	2025.74	2264.73	1917.17	1763.27	2063.32	1662.36	2457.43	1988.79	1733.51	2069.38	1774.05	2006.21	2318.52	2335.14	2281.27	2205.87	2393.51	2023.35	2288.54	2051.05	2525.72	1904.23	2328.34	2071.91	2058.17	1858.91	1885.71	1802.75	1393.82	2028.85	1916.29	1088.65	1527.88	1920.75	1683.11	1541.99	1741.66	1362.41	1660.72	1784.68	1948.51	1187.48	1825.56	1367.7	1589.73
STRAP	3562.77	4115	4276.95	3793.61	3661.76	3856.36	5161.26	3619.7	3379.71	5207.6	4072.72	3944.55	4942.08	4104.49	5432.26	4085.7	4200.97	4167.76	4727.17	4290.79	4526.03	3750.93	3784.59	4139.76	5331.26	3847.71	4285.8	3489.95	4071.94	6320.12	4231.02	4995.4	3520.56	4647.7	3797.43	2225.32	3438.23	5492.92	3287.93	3218.92	3813.81	2162.32	3825.24	3842.54	4325.2	3003.7	5850.73	4868.86	3959.13
ABCC2	40.9482	18.6498	48.4513	32.7799	38.0708	52.9033	14.9745	49.7288	67.5993	45.5739	35.119	33.9959	28.8135	70.2433	65.6517	22.7709	21.9589	52.161	53.1716	42.5583	31.1379	53.3855	17.9882	39.4199	147.132	150.76	48.336	42.4886	47.1177	26.0407	35.2609	51.7823	52.2668	4.77228	49.34	34.5396	110.989	57.0885	56.6655	45.4514	71.668	80.8163	52.8854	43.7605	46.5228	62.5845	30.7849	31.0853	79.4208
DEF6	1376.88	1330.68	1213.25	1445.09	1411.61	1526.33	1255.97	1553.5	1430.49	1453.99	1250.12	1302.86	1182.79	1243.99	1961.49	1625.96	1638.09	1656.16	1599.24	1070.53	1381.7	1805.52	1557.01	1153.69	1378.24	1940.26	1420.55	1187.42	1742.8	1347.86	1679.6	1615.84	901.699	1710.42	1374.38	1715.56	1518.41	1974.06	1567.74	1596.81	1820.67	2222.61	1551.87	1276.39	2229.53	2515.09	1537.82	1583.56	2419.29
PLEKHO1	4978.77	4609.34	4636.81	4958.51	2675.94	3319.46	5459.2	3843.96	2732.09	7371.41	6651.83	2921.48	5026.51	4503.22	6335.69	3976.77	3690.38	4112.12	3758.84	5013.04	6158.7	2796.4	2407.47	4063.55	6400.43	2332.43	6560.53	3713.33	2606.45	6132.48	4560.63	7086.06	2546.53	3364.63	5046.3	3059.6	2504.31	5253.07	2369.13	3567.15	4023.41	3165.28	2271.31	2039.76	3559.52	3190.27	3999.09	3031.58	4761.89
GCLM	1063.14	1159.66	1391.85	1185.49	1040.92	1196.55	1509.19	985.606	1162.14	2558.27	1221.61	1070.66	1329.62	1234.43	1740.14	1303.15	1061.77	1102.33	2945.9	1104.6	1449.44	999.412	1157.26	1136.66	2270.93	1691.79	1159.98	1021.01	949.759	2417.01	1179.14	1092.85	1099.07	3220.48	943.017	2184.07	2389.68	1975.01	1749.03	1218.23	1174.23	835.989	1000.38	898.509	1956.23	1333.07	1178.53	1964.76	1744.94
UBR2	3626.08	5069.86	3962.87	4486.18	4469.25	3648.12	3641.79	4353.08	4537.6	3767.54	3098.96	4288.49	3569.79	4354.92	4176.14	4093.62	3363.85	4327.74	3912.22	4051.48	3359.83	3646.29	3602.71	3854.69	3016.47	3861.62	3712.12	4137.5	3909.72	3309.43	3599.66	3154.26	3649.72	3393.88	3067.94	3786.35	3151.29	4085.19	3950.24	4277.94	4329.72	3629.78	3738.15	2579.45	2947.65	3400.57	2939.95	3664.27	2523.63
EHD2	18297.1	19676.4	15604.7	14466.9	14370.5	16617.4	14941.8	14289.9	16743.2	14861.8	33018	11913.3	19230.5	17353.5	12867.4	15120.9	14100.7	12570.2	12280.6	13598	15270.8	11913.7	14185	18339.4	6902.68	6569.19	12289	14583	13418.5	13780.5	16805.3	15964.4	20242.9	17965.4	18034.4	8110.3	6851.61	3270.4	11715.8	15379.2	15619.9	5410.22	4509.43	10156.1	11574.8	6783.9	9708.36	9843.35	8336.74
DEPDC1	22.3128	19.5437	41.2666	44.9798	18.0342	22.5666	50.4144	30.7145	46.4871	11.125	32.9243	48.5785	88.4484	14.2476	59.2977	9.89694	49.3048	36.4854	100.182	6.73077	203.945	49.1141	18.9876	43.0191	31.3369	98.2765	27.3367	56.0865	18.9872	66.0265	17.6056	18.8905	36.3918	115.983	31.7346	159.349	28.4388	789.149	32.9787	42.9082	50.6649	80.7764	320.32	78.0238	138.355	129.458	180.384	207.883	299.294
CCDC28A	1930.82	1337.8	1922.23	1562.24	1711.16	1629.88	1155.14	1246.04	1738.97	1017.68	1966.15	1342.7	925.642	1470.49	1309.09	1485.35	1603.03	1649.2	1326.23	1523.66	1377.26	1426.49	1699.92	1511.39	2287.64	1021.53	1962.69	1759.01	1548.84	1297.12	1752.02	1425.54	1167.32	1596.85	1727.04	1121.3	2499.44	1229.73	1866.45	1432.41	1345.94	1697.05	1863.89	1296.39	1532.47	1420.42	788.355	887.707	917.243
RRAGD	1490.45	1470.51	1918.61	2021.45	1864.44	1371.03	1584.85	2235.32	1635.45	1388.86	1183.25	1675.94	1596.6	1377.95	1743.33	1661.61	3041.64	2978.54	2190.27	1712.72	1561.64	1700.9	1833.83	1501.52	1687.3	2068.53	2883.09	2152.41	1747.31	3354.11	1811.43	1416.42	1013.5	3673.55	2058.7	1568.67	1519.61	2123.49	1837.61	1187.87	1694.91	1284.13	1183.87	717.657	1576.75	1179.93	1988.15	1059.96	1241.48
HSF2	703.806	702.761	591.366	649.448	755.395	626.975	481.332	537.106	649.741	598.148	493.487	538.241	581.116	614.818	462.857	687.222	604.844	649.414	614.545	592.755	706.39	632.099	677.569	614.948	1083.77	427.374	505.398	647.525	630.768	413.148	804.993	724.689	751.959	501.118	560.279	691.214	949.246	604.39	785.929	558.934	528.657	830.897	689.376	729.1	643.985	578.106	609.575	555.826	497.869
PHF20	3193.18	3163.74	3412.77	3064.5	3524.51	3262.03	5137.15	3178.44	3509.64	3590.8	2661.43	3109	3300.52	3090.11	4683.45	3443.04	3045	4688.57	2896.84	3161.45	2958.87	3145.53	3390.84	2866.8	3079.11	2866.16	3843.45	2910.25	3430.29	3685.89	2622.9	2769.69	3079.2	2719.56	2995.92	3728.75	3183.15	3310.41	3371.35	3319.31	3052.21	2509.86	2480.71	3544.63	2866.87	2796.61	2964.36	3874.38	2543.04
HSD17B6	5148.2	7150.55	4156.69	6825.35	5489.14	6109.78	1809.5	2440.54	6784.73	3814.05	5122.13	3830.87	1078.49	3932.21	3317.21	6120.63	7942.76	4325.98	3188.27	8451.41	3102.17	3998.65	7144.45	5916.53	4911.53	3885.3	3222.5	5835.02	5184.87	3283.48	5551.31	4183.99	2066.04	4757.73	3889.58	3604.89	734.494	709.073	2889.3	6479.32	2798.27	7823.06	2259.91	3379	4297.53	7400.74	3382.11	1170.21	4614.08
NR1H3	2084.41	1539.09	3391.28	2176.08	1990.68	2247.85	3643.99	2314.88	2128.82	1148.84	2189.88	1855.68	1912.27	1819.75	1900.09	1914.12	3107.41	2823.74	2213.79	2177.75	1962.59	2103.43	2535.39	2694.71	1902.39	1743.2	1986.88	2762.87	1650.32	5398.18	2115.97	1314.84	1467.87	4958.93	3082.23	2099.57	1521.98	3503.64	1607.92	2023.42	3792.99	2209.67	2888.1	1620.96	2360.11	1588.68	1922.28	1476.79	2833.11
TYMP	4297.28	6389.83	9177.62	10291	5312.81	5011.26	8789.29	6012.35	7504.22	6507.15	6324.01	6823.29	6953.25	5999.22	10989.5	6751.41	11581.6	7070.6	10692.6	7820.2	7310.51	5242.56	7396.29	6871.21	7993.77	7041.64	8944.58	6769.21	7444.24	17410.7	6826.08	5838.74	3122.91	14682.8	4715.37	7415.24	5151.43	12800	4495.15	5179.98	9318.65	7371.36	6747.55	4126.18	9867.48	6123.85	12385.1	5817.4	10799.5
NCAPH2	3049.83	2572.32	2575.5	2342.89	2664.92	2801.64	2348.04	2312.16	2425.7	3056.84	3557.29	2013.07	1878.78	2447.37	2724.08	2999.42	2922.26	2606.37	1988.83	2906.82	2628.99	2706.69	2602.34	2724.28	2604.03	2414.21	2883.11	2556.65	2850.28	2508.03	2684.2	2211.34	1756.75	2212.66	2706.98	2377.98	1926.94	2654.6	2177.53	2520.03	2280.87	2957.17	2604.06	2762.22	2593.57	2254.12	3186.3	2737.58	3513
TOMM34	1078.98	544.168	812.114	853.739	725.34	821.724	1253.63	887.055	677.226	1277.26	853.161	751.011	1016.24	920.234	940.514	733.76	1065.03	647.636	1440.74	878.915	968.526	859.533	926.41	659.744	2508.95	1155.64	888.898	773.213	864.58	1588.52	1126.23	1168.39	1241.17	1259.71	1194.31	1247.07	3233.72	1962.65	1441.04	789.921	844.58	1178.36	1570.52	1067.94	1483.78	1204.72	1397.22	1507.74	1176.83
SEC63	5706.77	6414.79	5960.46	6092.47	6610.21	5973.62	6228.15	5797.16	6893.56	5737.83	4788.8	6129.6	6084.58	5854.91	5757.43	5541.34	5687.85	6552.47	6840.75	6014.61	5631.17	5743.31	6180.07	5943.4	5762.49	6089.52	5466.78	5928.15	5850.08	5314.65	6128.81	5692.56	6248.29	6362.76	4917.25	6087.53	5346.2	5228.3	5763.13	6124.31	5768.33	7541.72	6829.43	9494.56	6681.96	7728.64	5501.98	5438.43	4975.25
KPNA6	3667.04	3789.9	3830.05	4204.09	3996.38	3275.55	3917.96	3823.17	3787.51	4758.28	4141.8	4056.28	4301.58	4122.84	3863.71	3891.61	4550.49	4554.65	4598.33	4030.18	3368.72	3620.67	3349.87	4068.94	3392.35	3155.46	4087.21	4663.85	4433.56	5124.57	4509.57	4023.06	4076.51	4336.29	3493.4	7440.23	3723.94	3568.34	3649.47	3719.75	4082.22	4581.09	4419.23	4073.84	4496.69	3959.25	5372.79	21645.1	4110.63
VIM	107215	78988.7	130777	105969	90737.5	98485.2	149685	104699	76942.7	94192.4	95856.6	118925	139452	97524.9	137835	112546	156245	151869	73324.9	100722	114826	80344.3	124568	99791	89154.1	43985	147320	94241.9	102792	192300	130240	106948	105016	151288	149404	54975.9	57595.3	42114.9	71881	68660.8	141316	35694.9	29901.1	48491.1	70810.6	74688.4	75835	73218.7	79504.5
RTEL1-TNFRSF6B	24.1679	82.8344	54.7097	111.544	63.1169	68.6824	85.9401	123.931	120.413	95.8272	26.3686	89.386	72.2343	91.7281	72.0281	34.6535	74.5177	95.6505	67.4912	59.5803	77.7544	112.087	69.9554	77.9844	24.0384	169.382	83.0051	65.0958	60.6984	64.9493	70.5535	41.0323	59.6361	28.1901	64.4356	136.335	94.4743	100.89	73.142	141.695	84.5906	167.812	223.872	145.649	90.7449	201.607	119.508	169.858	211.618
FAS	2165.4	2367.46	2389.75	2043.93	1980.66	2124.04	2865.95	1728	2015.78	3586.18	1730.43	2217.11	1434.53	2053.42	3050.28	1830.94	1607.44	1991.71	2121.76	3523.5	2263.58	2079.94	2010.72	2394.39	2997.65	1299.4	3475.68	1865.7	2233.08	2727.52	2056.54	3281.35	1822.04	1325.29	1789.83	1649.32	1468.83	1202.12	1649.12	1654.98	1686.86	2003.25	908.121	2271.08	2010.46	2965.89	1223.23	988.765	1610.06
RNASET2	2415.82	3337.44	2922.79	2508.76	3075.68	3212.49	3010.37	3297.81	2943.37	2712.63	2442.11	3066.26	2361.82	2810.21	3598.91	2639.96	2344.85	3514.89	3577.84	2103.62	2052.57	2078.88	2837.19	2301.14	3312.98	2101.16	2908.33	2464.39	3131.22	7283	2927.45	3226.15	1929.52	6517.14	2964.08	3964.92	5200.86	3098.15	3012.9	2606	2853.11	2453.94	3850.11	2012.16	4233.33	3074.86	1740.99	2319.64	3100.06
CD44	14894.4	15777.7	23304.3	26677.2	25184.5	17838.7	27592.9	16407.6	19776.3	29515.3	13069.1	27491.4	15235.4	20356.6	29466	22614	35585.4	25087.5	17975.1	21560.5	15497.4	18884.9	23375.1	24368.9	19466.5	15297.7	36590.5	26083.9	25959.7	45599.6	25168	23988.2	11554.6	32656.6	18795.6	23405.5	7253.08	9251.6	16035.8	17024.8	26778.5	25844.6	22186.3	19173.7	21610.4	34105.9	12054.1	30940.1	20280.7
KCNG1	5.55163	8.86287	5.33311	9.3473	22.0404	18.0124	18.3357	7.19051	29.5487	7.41084	26.2791	6.78775	42.1535	19.1462	22.2305	3.95587	2.24103	1.67106	37.81	18.7395	6.71547	12.8298	14.9904	26.9389	40.6666	42.7464	8.42665	1.75917	29.0534	18.8801	0.893226	18.489	13.173	7.1161	9.9668	9.57951	87.0531	9.49305	35.0201	6.65924	13.6117	30.9565	20.7446	14.2558	23.2634	21.5938	31.6926	49.3058	11.0466
AGPAT4	883.462	870.179	1168.4	1398.25	1071.98	899.394	1652.38	1141.16	1100.86	1232.59	803.826	1263.03	1465.85	979.236	1568.55	902.1	1019.03	1318.85	1064.46	944.489	1041.84	1036.77	940.401	1379.63	1031.6	821.307	1415.28	908.87	1172.73	1825.74	959.091	1168.49	1069.99	897.9	1297.49	295.668	746.204	528.242	806.528	891.185	1212.3	1915.76	459.248	1103.2	574.283	777.611	892.509	576.488	634.596
SLAMF7	1536.08	2034.38	1985.06	1908.07	1284.37	1664.77	2422.41	1608.67	1073.4	995.355	485.838	1153.24	938.582	771.053	1232.84	1500.2	1264.47	1330.99	1688.2	1458.08	980.768	1175.58	879.44	1076.6	1044.13	4352.38	1147.37	1825.04	735.864	832.141	1454.9	1931.79	890.084	1680.03	1628.13	1990.12	2050.93	9084.18	1281.4	1574	2324.36	2089.22	3974.51	5646.3	959.367	1493.78	1993.78	809.644	2181.85
BTN3A1	7281.04	8797.44	7563.22	6565.74	7124.15	7773.43	6094.07	5657.9	7003.43	5454.1	5289.93	6437.59	4897.14	5544.69	4542.62	8117.93	5324.08	4863.25	4385.66	6617.63	5320.18	5948.31	6652.77	5877.96	3953.04	4086.33	4063.06	7307.34	5938.9	3524.27	4429.7	4923.54	5217.61	4803.39	5021.98	5923.37	3980.15	4427.83	6287.42	6676.6	7669.74	4861.5	3917.5	4081.45	4168.08	3851.4	4668.85	5564.71	4187.3
MIPEP	707.515	689.375	778.922	922.166	768.419	840.837	788.417	577.787	596.931	700.471	780.778	738.384	682.268	874.008	667.265	863.483	906.152	826.765	853.817	691.54	757.5	744.216	991.369	761.961	1872.05	871.214	827.953	841.061	749.486	815.56	794.76	809.851	762.224	927.213	663.291	600.002	2662.14	681.483	1095.97	789.954	809.156	728.499	1630.63	1136.49	1229.27	860.67	465.661	608.66	803.637
PRKCH	5413.53	5118.83	5536.01	4783.25	5068.36	4822.12	6188	4842.27	4042.12	4316.39	3923.59	4446.85	6351.65	4752.82	5811.43	5351.22	4399.29	4878.05	3551.27	4058.27	5174.66	4267.71	4397.2	4493.85	3379.82	1815.9	4750.2	4976.76	4999.08	3628.11	5415.75	5300.5	6438.34	3063.74	5777.58	2120.69	2788.82	2043.53	4714.53	4020.8	5750.76	2267.28	1693.9	2188.25	2658.86	2982.11	2753	2605.55	2445.12
IFNGR1	11086.8	10773.8	12098.6	11640.4	20702.2	11285.4	20485.8	11465.9	18386	10970.5	8341.73	12960.7	11511.9	11517.6	15035.4	14257.4	10411.5	14861.9	12830.8	11765.2	17301.1	20099.9	15700	9884.14	10774.3	6656.64	14024.7	11465.6	21828.9	13335.5	11429.4	10784.3	8363.61	11249.2	11085.9	7043.71	6100.7	4527.75	15164.4	9414.94	14482.6	5944.37	8621.81	8434.19	7905.74	8682.08	8250.94	6941.59	8649.89
B4GALT7	1015.67	867.51	1101.99	1172.38	1047.94	1156.01	1082.92	1055.25	833.582	913.499	1289.57	1007.51	1104.47	932.982	896.036	1300.18	1338.95	1026.71	1254.65	935.123	1209.53	1085.88	1114.29	1039.86	1109.9	1674.68	1166.27	1102.42	1208.08	950.128	1256.22	959.688	874.058	1504.38	1423.81	1488.99	1471.18	1859.84	1128.95	984.683	1151.67	1453.61	1360.09	1951.26	1479.37	1334.15	1323.23	2945.33	1514.92
SH2D2A	544.621	412.379	538.448	342.984	339.628	781.086	538.568	371.629	440.558	253.002	437.543	315.75	365.07	321.316	1181.89	519.873	265.199	746.001	300.632	440.313	283.263	339.555	258.835	310.136	269.399	245.925	442.347	350.873	267.319	840.181	220.943	759.319	212.162	478.842	438.844	346.556	354.269	675.796	416.148	513.436	576.273	378.419	689.363	238.887	338.617	438.973	631.585	282.549	678.04
VRK2	673.992	897.806	1245.6	1009.32	965.783	890.376	1009.57	744.174	1130.43	919.087	402.494	1043.46	989.616	897.109	1070.78	810.008	1219.51	884.132	911.081	1005.84	1015.17	834.975	1037.34	952.011	1180.89	964.372	1407.92	951.39	1160.96	1238.04	783.609	800.724	792.753	711.828	743.713	864.02	650.616	911.834	808.594	721.66	968.778	798.185	903.959	914.709	837.611	754.979	876.207	505.319	942.212
TNFRSF1B	6186.2	9436.92	8891.34	7509.44	8204.15	8350.91	7901.22	9990.19	8388.49	9052.35	6765.93	7741.42	11190.3	9227.37	19938	8111.99	5674.72	10275.1	9380.73	7257.21	8012.47	6295.33	6527.85	6199.76	7902.93	4550.52	8049.4	9926.4	5235.59	19707.4	6522.46	8617.33	6261.47	8361.09	7142.69	4475.63	5102.99	6407.61	7049.66	7309.74	9064.86	5208.12	4431.68	3399.93	6618.89	5973.91	5384.12	3528.82	6674.02
VEZT	3559.05	3159.28	3735.83	3952	3582.62	3706.64	3988.99	3060.87	3492.75	4182.45	3422.45	3425.73	3940.26	3395.54	3919.84	3282.62	3466.84	3360.11	3714.87	3752.53	3912.93	3354.81	3545.74	3739.95	4503.27	4690.39	3656.43	3185.18	3408.53	3858.21	3452.96	4348.31	3651.16	2801.55	3655.06	3410.01	2231.59	4247.94	2798.66	3895.96	3277.84	4836.57	4637.96	4913.37	3030.65	4110.24	3969	5865.54	6112.41
POU2F2	589.3	685.858	498.937	532.302	617.139	353.484	556.926	592.29	622.264	1038.23	275.285	640.265	730.312	527.902	909.754	389.159	304.646	292.055	790.41	306.548	505.372	356.643	287.817	345.094	432.275	511.598	307.874	518.197	370.642	538.199	506.007	652.503	513.956	402.785	767.217	560.648	436.917	1423.02	654.084	686.285	552.86	725.102	641.688	515.882	439.303	860.638	456.749	242.371	621.669
BRD9	1955.94	1782.26	1834.25	1938.97	1960.62	1928.18	1950.39	2020.09	1723.14	2281	2636.16	2130.64	1696.24	2139.57	1931.86	2193.37	2097.2	1957.82	1593.11	2093.44	1919.27	1982.77	1754.88	2372.89	2018.28	1725.24	2342	1915.45	2054.55	2026.48	2222.75	2109.52	1896.03	1786.53	1955.66	1730.92	1610.52	2818.33	1722.25	1936.58	1764.22	1789.91	1694.93	2817.43	1782.55	2297.25	2189.73	1853.41	2075.63
SNX1	12500.9	11972.7	11750.4	11634.8	12427.9	10245.3	10771.8	11601.6	12682	11930.6	14799.5	11440.2	11153.7	12779.2	10324.4	12220.5	12441.8	12908.5	11537.3	11378.5	10363.8	11033.9	11613.6	11550.6	8058.51	9027.6	10650.9	12980.5	12156	12268.6	11420.1	10172.3	11380.2	11440	11011.4	6988.99	7667.43	7499.33	9808.13	9867.72	11264.3	7818.65	5859.14	12411.9	7704.35	8466.36	7041.47	6488	6513.27
TBPL1	883.485	820.331	857.012	611.013	781.443	784.555	703.622	663.704	827.227	582.324	722.658	699.522	689.13	893.967	676.793	722.869	668.401	640.701	605.346	814.213	901.862	824.284	736.531	757.486	1077.52	507.467	789.075	670.123	664.292	691.647	672.198	837.49	885.523	540.921	787.287	681.611	840.659	483.502	831.252	682.883	662.466	778.411	675.902	591.074	662.798	641.737	332.351	467.423	483.086
ARNTL2	215.952	147.798	442.413	442.339	186.345	225.175	769.952	254.963	177.517	342.32	199.623	454.693	403.133	251.919	693.694	128.725	338.596	343.375	612.489	206.041	386.531	309.659	342.782	296.691	421.826	2703.09	274.249	190.777	173.961	759.938	172.659	233.298	268.73	652.148	291.378	252.464	941.048	994.637	252.379	205.627	378.703	317.314	521.451	1374.45	1063.33	610.474	1057.46	343.427	885.848
BCLAF1	7766.05	7739.24	8384.31	8488.78	9014.65	6866.24	7712.14	7656.3	9401.65	8510.94	4855.7	8539.08	9971.65	8359.72	11254.3	6551.38	7351.14	8114.72	8979.89	9111.37	8305.68	7642.79	7323.34	7853.71	8621.28	8611.65	7883.38	7604.85	8574.38	7013.02	7877.11	8539.65	9137.21	6109.92	7436.65	8576.89	7401.76	6900.64	7522.45	7399.09	7571.31	9098.58	7671.19	11209.8	7220.82	9605.26	6818.77	6137.76	7231.03
SLC39A9	2946.48	3401.57	2971.25	3405.64	3120.76	3048.16	3039.03	2965.03	3172.63	2697.74	3017.8	2941.89	3289.13	3068.59	2720.91	3121.21	3360.55	3187.11	3125.89	2925.53	2952.2	3013.13	3246.93	2899.08	3028.99	4526.14	3161.55	3290.1	3084.99	2654.4	3154	2924.92	3296.91	3727.54	2819.16	2642.94	2857.33	3611.17	2851.19	3240.01	3206.11	3701.16	4803.82	3430.4	2783.91	3800.71	3209.8	5565.83	3542.53
ANK1	81.9072	149.673	166.965	104.958	101.187	88.9477	85.9767	123.892	111.988	39.035	58.1586	111.73	44.7627	126.82	256.226	49.5071	226.708	111.278	39.8903	55.296	33.3798	156.929	122.922	98.5963	43.8746	248.694	116.626	84.9894	76.1008	44.9367	89.119	76.0483	56.8073	205.946	54.3628	148.809	415.161	121.828	119.489	108.734	103.124	54.9819	74.6526	60.8956	33.253	118.645	42.1678	107.967	173.687
IBSP	0	0	4.43693	5.59442	3.00649	4.56269	13.762	0	2.14182	0.896045	0.0383201	0	1.3984	0	2.14846	0	24.0517	0	339.9	1.62719	19.9594	0.0269393	0	8.931	0.0175852	4.81607	0.020196	0	0	9.49504	0	0.316054	0.173832	9.45782	6.61033	3.81839	2.45564	1.87878	3.10621	0	0	11.9687	230.966	3.78117	13.3316	2.1978	1.53002	98.5264	80.4439
TFB1M	333.278	307.275	335.617	338.311	363.671	343.316	315.149	308.337	369.768	211.143	322.405	288.549	253.999	271.089	201.257	380.25	381.302	388.62	302.673	286.139	289.908	342.743	389.752	331.676	411.376	326.077	404.512	305.664	354.357	250.261	378.818	417.693	306.38	320.825	371	415.686	459.301	290.286	315.205	333.824	301.367	440.377	728.745	688.195	496.803	427.103	298.241	272.208	359.316
RABEP1	3432.44	3586.83	3401.1	3090.74	3572.6	3262.03	3340.4	3413.55	3787.5	3966.63	2719.55	3365.5	3690.01	3246.42	3637.05	3188.55	2876.26	3527.04	3450.03	3463.81	3292.07	3019.54	3452.8	3176.98	3078.07	3479.96	3281.33	2689.58	3036.95	4056.46	3179.06	3586.7	3503.06	3282.64	3110.67	3105.69	2573.94	3442.71	2964.49	3337.01	3222.28	2767.91	2872.56	2911.65	2516.13	2842.98	2387.22	3310.58	2864.51
HMGB3	749.405	476.473	661.344	699.103	614.135	664.149	787.286	651.936	536.717	611.156	865.217	619.848	1048.97	779.071	747.759	693.16	992.716	567.65	1908.03	691.528	1245.05	1212.92	870.446	836.363	2822.16	804.983	739.703	713.524	1093.9	876.941	1076.1	1667.04	1190.34	1061.92	1007.49	2540.21	3035.64	49566.1	1138.22	930.699	522.969	7884.06	16399.7	3274.29	1731.68	5333.28	7499.96	9637.72	5818.63
NUP160	2526.61	3049.74	2828.57	2818.97	3111.75	2569.79	3149.02	2686.52	3083.88	3050.32	2112.04	2712.6	2999.31	2741.63	2924.26	3042.99	2707.51	2827.19	2846.74	3087.37	2657.87	2953.33	2652.31	2919.71	2369.11	2822.05	2948.26	2641.66	2864.77	2531.64	2595.06	2704.89	2963.01	2156.49	2552.83	3292.89	2131.21	3235.21	2582.34	2878.34	3294	3225.51	5292.07	4505.04	2806.02	2667.19	3324.45	2898.36	2663.13
BAK1	1107.82	1462.51	1540.81	1411.35	1183.19	1356.38	1987.02	1350.03	1008.96	1519.1	1381.71	1543.81	1385.89	1464.1	1750.74	1524.96	1962.41	1401.41	1664.69	1671.01	1530.53	1239.65	1414.1	1599.24	1920.13	2402.05	2401.87	1656.81	1572.4	3383.56	1132.71	1203.81	991.706	2511.15	1456.45	2564.23	1568.02	2805	1070.24	1644.01	1848.05	1184.35	1764.38	1915.08	3303.88	1889.58	2440.09	2421.8	1927.83
MUSK	55.832	106.002	111.291	78.7102	94.1739	55.2018	145.459	110.331	104.588	50.2053	61.44	103.959	137.02	82.1085	170.473	52.4785	67.9601	195.752	55.2253	182.4	63.3431	97.1632	50.9673	87.8418	22.9951	68.6027	63.0576	90.4308	64.3181	26.0635	90.0563	79.6415	92.9307	60.8788	83.8139	59.5203	33.1302	24.7241	52.5367	64.0817	95.2128	78.3099	18.679	58.0591	60.8572	133.637	9.64852	25.333	15.662
IKZF2	822.025	1023.41	848.019	1149.9	1123.07	700.163	885.821	897.009	962.46	966.537	662.365	1103.7	502.7	753.55	1058.07	786.243	1009.15	955.436	824.166	698.344	628.682	808.281	897.429	879.397	1188.2	1982.91	1123.19	774.123	802.047	964.262	637.834	769.285	907.375	765.702	757.088	2175.45	1448.69	1067.93	1469.88	894.488	861.523	1994.73	1359.04	2218.76	1050.06	1850.7	1274.5	1390.6	1684
GRN	25942.1	36860.5	56331.9	62542.2	53138.1	40725.7	61509	46083.4	46714.6	38467.1	34393.2	55071.2	48318.5	41191.8	45907.9	56573	101289	86484.5	29276.2	44465.8	44152.9	47109.1	65590.3	49791	31660.8	49044	97484.7	70678.5	81581.3	95161.4	82718.1	46456.8	25192.2	93130.1	47053.1	36986	21227.7	30614.1	34540.7	35712.3	87358.1	20166.8	43760	28289.4	65226.2	41734.3	32187	34172.6	46105.7
FAM13B	2519.17	2402.2	2287.43	2432.86	2198.06	2687.95	2219.69	2569.88	2981.39	2859.62	2114.23	2610.59	2919.47	2359.65	2653.12	2838.01	2207.87	2174.28	2190.27	2470.74	2540.13	2104.5	2321.52	2461.62	2174.9	2236.04	2156.04	2565.7	1914.96	2568.21	2243.17	2285.23	2784.41	1997.23	2234.6	2063.09	1655.38	1430.56	2122.93	2394.43	2721.81	1597.24	1984.15	2517.6	1770.37	1942.42	1897.92	1283.87	1886.26
ARHGAP31	7811.66	11563.9	9762.7	10093.2	12228.6	9335.81	11146.5	8021.61	11478.7	12223.6	9277.09	9574.77	8934.8	10080.6	10526.7	10147.9	9458.19	9585.7	6740.55	9568.71	8330.12	8298.38	10125.6	10200.6	4493.9	4147.6	8841.62	10260.1	10220.2	9840.84	8718.3	6726.2	7914.95	8709.9	7082.42	3042.31	3139.52	2212.94	8284.67	8980.87	10423	2819.48	3690.48	4179.49	5307.73	7072.89	4578.62	4027.17	5102.74
CENPQ	340.732	340.248	265.608	262.392	272.503	452.449	267.03	303.821	373.989	179.512	269.777	315.757	223.565	259.929	240.437	200.024	321.047	323.403	350.728	213.726	515.293	235.986	345.78	203.456	392.581	271.304	367.739	338.236	410.57	280.924	302.674	247.942	358.547	159.3	355.942	285.117	246.827	477.819	310.052	351.555	311.87	374.15	312.039	232.229	218.017	391.504	204.753	230.867	251.231
SARS	6187.15	5857.2	6368.77	5919.09	6274.59	6471.14	6247.64	6031.35	6289.26	6886.71	7302.14	5090.02	5863.2	5949.79	5864.4	6407.8	7356.6	6729.81	6876.54	7103.08	6649.65	6172.53	7233.4	6390.72	7294.2	6418.07	7166.8	5990.55	5950.67	6809.99	7528.02	6846.14	5866.53	7398.83	6259.87	10225.3	5746.47	8705.29	5571.55	5646.24	5857.77	4003.03	5748.22	8070.6	6322.37	5512.32	5302.01	8084.11	7904.45
RANBP3	4105.54	3415.81	3593.14	3348.46	3384.25	3418.49	2922.16	3064.5	3236.02	3409.39	5410.49	3109	2834.96	3256.79	2675.37	3897.56	4004.82	3374.89	2958.2	3883.7	3233.21	3406.05	3243.94	3902.21	2869.25	3311.59	3651.17	3807.41	3779.22	3049.77	4153.97	3605.2	3077.76	4498.96	3826.8	2422.14	3124.14	3628.31	3584.57	3239.19	3152.14	3587.64	4122.74	3623.63	3602.66	3634.6	2419.72	2880	3008.61
ARID4A	2731.43	2990.08	2691.27	2690.58	2965.48	2064.4	2346.89	2436.05	3357.49	2280.05	1742.5	2534.81	2644.84	2887.6	2821.52	1797.27	2021.61	2877.63	1976.56	2831.87	2446.84	2255.05	2190.61	2497.48	1669.56	2759.95	2482.8	2510.53	2958.13	1894.33	1922.84	2745.46	2573.95	1491.52	2343.5	1844.21	1513.7	1388.68	2182.67	2362.4	2344.59	2473.78	2505.57	2853.61	1697.34	2605.68	1950.76	1939.51	2275.18
TSSC1	1053.84	917.391	1109.16	1212.68	987.824	1262.93	1104.69	934.976	965.638	893.031	1621.81	1101.75	1015.45	919.42	834.61	1230.86	1369.63	942.372	1298.62	1060.33	1353.91	1019.69	1173.25	1211.09	1447.14	1230	1364.85	1024.64	998.713	1187.33	1080.73	1033.61	942.274	1310.03	1175.06	893.772	1507.74	1588.58	939.415	902.913	938.091	1105.25	1149.65	1092.69	1232.62	1087.16	1118.41	1046.15	1210.09
PNPLA6	6096.82	9714.79	11988.2	15666.5	13652.2	10082.1	9495.24	10836.5	11347.7	11659.9	14223.8	16199.9	10986.3	13739.4	9539.59	16464.6	25379.9	14343.8	5797.78	13045.3	10797	14119.6	14215	16477.5	8746.59	8378.66	25766.2	15644.7	20651.6	19665.1	15509.1	11163.2	6379.14	17522.8	8751.64	5290.7	4224.58	5069.34	8743.06	7584.58	16602.5	4298.06	4963.48	4681.1	11128.8	11710.5	6773.25	5618.73	5071.31
IFT88	949.582	781.126	700.84	813.448	733.354	675.395	648.635	694.446	878.997	832.577	742.402	807.367	675.419	775.101	675.738	697.122	676.076	594.611	736.228	716.241	948.516	760.231	931.407	756.581	2010.91	741.24	801.687	891.71	881.816	688.119	918.255	911.451	1075.65	684.877	698.508	478.08	1849.85	350.245	1301.96	774.816	769.706	725.951	674.862	866.175	872.988	670.847	431.538	380.155	302.025
ALG1	619.072	703.634	634.432	680.367	690.275	768.8	629.149	626.626	696.232	533.016	805.99	596.533	658.694	716.888	523.229	897.152	1134.02	682.436	1096.15	622.55	765.267	754.888	779.504	720.726	741.328	1426.29	781.721	743.385	731.364	874.547	871.835	665.725	704.156	1307.67	724.421	1406.44	1690.7	1148.83	603.623	1024.34	769.633	900.525	2425.72	2553.82	1446.14	1283.44	1116.79	2189.73	1536.19
ZCCHC8	1437.4	1434.9	1367.61	1463.84	1392.57	1546.59	1393.47	1449.51	1806.58	1496.78	1247.93	1368.93	1235.28	1392.34	1399.11	1404.15	1312.68	1581.39	1160.58	1569.66	1514.97	1445.71	1464.07	1491.67	1425.22	1474.36	1451.02	1518.44	1363.04	1390.34	1357.41	1482.79	1504.02	1098.16	1568.75	1351.71	1227.95	2230.12	1313.32	1490.61	1544.25	1877.72	2076.39	1174.55	1004.71	1505.61	1195.63	1550.22	1283.06
ABCF2	1688.75	1599.66	1721.18	1595.97	1614.98	1864.02	2160.08	1782.27	1438.95	2801.96	2324.74	1680.8	1919.91	1956.15	1967.86	2108.21	2028.17	1722.21	2354.89	1961.43	1759.34	1691.29	1768.87	1896.86	2063.18	1754.67	1959.55	1746.33	1797.16	3041.39	2192.11	2013.39	1759.58	2395.28	1835.87	1754.91	1670.75	2191.06	1772.73	1648.21	1829.49	1656.57	2680.77	1696.15	2114.49	1815.17	1991.36	3126.85	1731.06
CHPF2	2121.63	3009.65	2578.18	2970.79	2770.12	2870.32	3742.6	3377.39	3096.56	3323.82	2542.99	2891.37	3473.23	3099.7	3417.81	2573.61	3293.71	2715.03	4741.48	2712.6	2943.32	3197.84	2777.23	3153.68	2568.54	4303.02	3185.71	2572.92	2920.95	3785	2723.18	2289.06	2669.83	3926.56	2972.43	3874.66	3209.18	4134.67	2329.99	3623.63	3290.73	3692.54	5069.21	4664.93	3707.8	3449.12	4382.73	7180.33	5166.48
LRRC7	26.9839	46.3512	52.0991	28.1038	30.0557	20.3051	24.1038	48.8674	62.2872	26.0316	16.4898	27.1982	29.6333	43.1087	34.9512	24.7533	18.6639	23.4359	23.5246	41.7607	13.3809	34.1686	18.9877	41.2543	22.9836	28.5749	43.0672	30.7382	19.9045	22.4796	37.143	40.5465	42.0133	3.60392	18.3675	28.7968	18.9538	42.8468	39.1359	43.0489	31.4277	53.4206	31.1008	54.2875	30.9854	46.3429	75.0431	21.8595	49.9233
FUT8	891.84	1209.56	1017.62	1024.3	1000.85	1097.49	1218.13	871.672	1213.9	572.077	625.094	951.155	1031.42	1157.09	1057.02	956.563	1791.45	1008.45	2761.84	856.754	871.916	1168.1	869.447	822.004	1195.52	3423.11	968.754	1128.65	958.831	891.131	1564.48	1268.28	961.153	1457.6	905.308	1815.39	1961.2	2313.84	1110.41	1756.12	1035.57	3801.83	4010.78	2686.06	2120.03	2949.75	1965.34	3117.68	2510.71
UBA6	1788.36	1780.47	2335.01	2234.18	1862.44	1875.29	2557.71	2155.73	2235.53	2550.77	1334.58	2220.02	2404.48	2170.66	2860.69	2063.64	1887.93	1894.34	2366.14	2017.63	2299.11	1965.69	1775.87	2196.27	2356.57	2447.75	2493.3	2221.13	1905	3085.09	1747.36	2420.07	2600.02	1880.19	2031.87	1830.76	1565.67	2673.64	1699.59	2084.12	2122.89	2113.33	1996.59	2381.48	1567.9	2135.48	2984.71	2266.79	2204.03
GAB2	4235.86	4249.5	3411.85	4336.23	5435.04	4089.36	4670.82	4782.59	4337.93	5276.44	4888.56	3925.12	5253.97	3836.52	6804.87	4112.44	4691.84	4845.02	5830.48	4251.61	3912.95	3685.8	3597.71	3918.33	3326.57	2873.48	3578.69	4442.27	4619.34	6261.11	3776.06	3902.97	4083.8	5354.64	4475.98	3069.21	2275.23	2436.63	3118.99	4206.32	4254.01	1776.14	2402.96	2214.91	3715.49	2589.53	3476.48	1976.29	2793.38
ATP6V0A1	3005.12	3831.76	3296.99	4019.47	4068.51	2900.73	3664.71	4441.69	3831.88	3845.68	3639.57	3489.85	4590.66	3374.8	4305.36	3918.35	4027.84	5275.39	4020.61	3929.68	3273.2	3552.34	2729.26	3846.62	2158.21	5986.63	3780.41	5156.75	4329.34	5912.93	3654.44	4028.59	3111.18	6487.93	3818.4	3711.46	2494.87	2863.04	3117.97	3846.23	4482.83	4560.47	3767.18	5585.37	3413.47	4226.71	4217.74	3225.64	4248.28
PIAS1	2984.64	3556.55	3197.39	3759.88	3869.14	3102.19	3331.23	3295.09	4353.76	3378.7	2355.49	3236.28	2812.15	3265.57	3366.97	3016.25	3476.69	3716.58	3443.9	3216.81	3007.74	3213.86	3634.69	3008.44	2469.35	2798.32	3281.33	3554.18	3897.95	3301.14	3248.7	2459.15	3079.19	2748.8	2645.83	2076.53	2387.38	1658.04	3054.09	2986.29	3322.26	2780.83	1844.21	4815.36	2389.98	2805.22	1906.02	1472.2	1990.64
SLC4A7	1131.1	1082.16	1154.02	1093.65	1176.17	811.617	2509.5	1761.49	1267.79	2118.22	427.721	1353.39	3475.81	1060.56	2899.84	1142.73	955.494	1742.24	1868.17	1062.86	1604.93	1284.49	1007.36	1034.46	1106.78	1823.37	938.291	1285.1	1261.53	2341.51	747.384	1305.4	2155.66	758.698	1670.07	2704.41	1142.97	1907.43	893.067	1313.51	1349.15	1403.71	1818.28	1600.02	1233.75	1599.45	2106.05	1518.1	2748.16
APBA2	668.439	386.528	675.751	400.149	475.879	512.167	572.969	550.685	365.563	698.638	819.107	689.816	669.424	509.55	694.777	706.038	418.587	508.567	579.777	491.402	486.496	521.057	491.687	424.887	327.87	280.245	494.886	541.712	456.75	365.935	607.22	512.218	661.932	408.653	740.372	541.441	369.644	1433.46	481.045	619.638	537.515	404.201	1341.4	485.416	1473.74	595.366	681.105	884.203	581.008
MAP2K3	2913.88	3115.62	3486.33	3737.37	2609.82	2892.86	6150.19	2911.66	2353.87	11911.1	5195.6	3179.92	4856.1	4599.71	9600.94	2920.19	4268.91	3812.17	3722.03	5414.19	3002.21	2873.28	3150	4467.85	7713.92	4461.5	5132.65	3113.72	2833.02	16725.9	3496.59	5696.07	2594.44	4850.18	3763.13	3100.88	3903.37	4270.79	2755.39	2712.22	2778.13	3251.3	2323.14	4371.77	4086.19	4072.48	4088.51	4218.89	4089.4
EFCAB1	215.018	49.817	77.1164	160.22	85.1583	312.964	74.5696	93.083	61.3085	195.319	191.951	261.339	145.156	448.144	45.5759	412.925	172.077	38.1796	32.7335	304.85	450.95	121.759	839.466	121.858	6669.12	84.0743	96.6932	501.019	576.409	297.488	788.308	526.897	1160.77	217.831	180.829	53.7387	7270.96	144.649	3004.47	84.2202	98.2176	993.61	45.6332	136.086	637.297	436.809	38.0983	37.977	37.8308
TMSB10	77819.8	51708.4	74828	58386.9	47906.5	67489.3	59349	49186.8	49352.6	44475.7	97227.3	54070.5	46128.5	47075.4	49753.6	57642.5	55566.8	45997.6	46819.8	50397.8	75143.1	59501.2	62555.2	57921.8	63628.5	39374.7	89071.7	52354.1	54743.4	67211.1	46164.3	73423.1	39321.8	75775.8	76290.5	45762.6	42210.9	52730.5	46703.5	46539.4	54367.7	33197.9	53354.2	60896.4	55212.7	38607.7	50480.5	50757.7	61782.5
ASTE1	494.345	497.017	499.856	344.86	455.842	409.734	357.561	410.521	399.358	426.054	287.337	449.834	396.278	397.108	354.82	430.751	444.861	334.676	330.284	494.843	394.306	586.162	418.733	458.082	385.286	439.688	471.761	404.244	419.604	311.636	488.379	297.924	468.9	299.749	455.635	393.607	310.571	315.037	319.323	383.593	449.736	425.764	419.844	308.381	293.246	479.934	308.009	481.13	374.104
RNF19A	4649.19	5801.1	6351.73	4760.75	4570.44	4832.26	7698.33	4493.21	4743.63	6348.09	3799.69	4571.2	9055.13	5539.91	9112.71	5057.12	4531.88	5777.85	6095.33	5805.1	7468.19	4565.61	4223.31	5030.81	6019.34	4916.71	5551.89	4461.25	4673.71	5949.59	4458.48	6380.18	7381.98	3023.99	4976.73	7229.97	3775.91	3882.43	4101.67	5310.7	4510.99	5280.38	3105.81	5192.24	4233.38	6851.81	14280.8	15337.8	4666.72
PEX3	621.864	775.788	843.547	796.582	676.249	695.647	755.183	760.468	831.454	761.876	696.345	732.556	815.432	677.004	725.51	745.644	818.498	658.089	791.443	924.097	845.227	732.468	832.47	715.346	1028.45	578.581	790.127	713.536	755.835	624.389	875.548	848.589	714.317	591.261	685.079	1102.12	788.731	588.204	765.332	784.062	632.63	734.529	1005.55	755.747	809.949	814.291	551.839	566.171	567.149
GABARAPL2	5257.13	4335	5086.41	4432.76	4445.21	5139.53	4252.57	3813.21	4308.35	3801.95	5617.78	4405.07	4037.59	4362.86	4066	4912.55	4895.64	4282.52	4227.16	4317.19	4711.51	4554.92	5250.66	4104.79	5737.42	3698.96	5259.79	4397.95	4049.28	4154.47	4902.31	4549.97	4001.06	3632.73	4685.27	5319.51	5007.33	4240.32	4547.67	4675	3998.39	3439.65	5074.39	3444.67	3600.48	3705.81	3429.25	2959.26	4313.85
MYOC	61.4082	170.124	596.173	57.1339	144.267	72.0983	98.6034	197.143	92.9927	213.048	172.162	97.1459	100.323	138.723	79.4609	107.932	23.0646	364.434	7.16966	322.083	103.331	132.412	206.869	179.294	374.779	18.6936	152.356	45.1659	50.7017	126.327	305.528	179.284	84.3927	65.6198	14.9836	26.8586	1147.78	38.0477	455.17	72.4588	87.0069	32.6101	0.0163284	29.4805	126.123	22.6931	47.0557	9.26858	57.2406
SH3YL1	2552.68	3231.45	2155.5	3196.65	3337.16	3304.78	2734.21	2608.75	3900.53	2776.82	3268.91	2873.89	2116.87	2771.14	2014.48	2796.42	2876.25	3072.36	4352.92	2558.45	2758.94	2328.73	2943.13	3551.71	3818.33	2948.73	3307.59	2772.79	2383.52	1895.53	2944.17	2886.05	2463.69	2343.8	2263.86	3833.39	2496.03	1767.5	2912.99	3234.98	3039.29	5560.01	4445.14	4959.07	4085.07	3984.04	1670.27	3492.03	2811.85
FAM136A	1171.13	1074.15	1340.69	1540.69	1154.13	1330.48	1087.52	1175.51	1166.37	1334.92	1397.05	1250.4	1050.42	1273.51	1052.79	1362.56	1541.66	1047.56	1658.55	1235.78	1636.02	1414.74	1409.1	1373.34	1895.06	2019.56	1578.14	1323.99	1157.31	1548.46	1401.05	1346	959.739	1643.71	1447.24	1925.81	1499.54	3267.6	1140.28	1274.71	1183.89	2312.91	2434.05	2229.19	2084.6	1575.74	1824.75	1802.88	2498.72
VCL	7094.82	9451.17	10080.4	7450.4	6321.67	7793.74	13525.4	7772.94	7604.59	11032	9989.86	8067.87	14411.8	10419.6	10008.8	7829.77	7634.94	9933.46	7634.24	9994.57	11657.7	7974.86	7510.22	8846.97	7041.54	8886.24	7744.7	7368.8	9378.26	8062.25	11502.8	10131.4	9745.51	9173.57	6707.96	4855.8	5806.68	3566.42	5857.9	7781.02	8540.11	3100.73	3481.08	7665.11	6324.59	5876.86	8292.45	6638.41	6713.73
DEPDC1B	18.5872	29.3606	41.2732	39.3541	30.056	31.5492	45.833	39.7779	44.3724	27.8854	19.7816	31.0825	50.9992	17.447	61.407	23.7618	65.6966	46.9532	85.8708	16.9619	113.102	53.3731	16.9889	44.823	43.8535	66.2904	25.2352	32.5346	28.9728	42.496	48.2862	33.465	11.8533	118.315	32.5715	124.787	128.768	607.339	18.5576	53.87	38.5753	73.0364	218.736	102.775	119.544	101.418	376.447	147.035	189.351
DAPK2	3813.2	4839.16	3269.17	4443.07	4533.37	3908.13	3586.79	3950.67	5703.94	4757.35	7508.22	2813.64	2860.04	3984.08	4401.74	4641.22	3861.3	4226.02	2014.4	4205.63	3799.65	4124.63	3394.84	5228.97	3084.34	944.669	4026.27	3999.13	3989.47	2331.04	3971.98	4174.62	3699.08	1850.88	3476.85	2105.34	823.026	1048.88	2831.59	3257.04	3153.11	2515.96	1009.71	4517.48	1894.27	2147.32	1712.61	1319.45	1822.54
NSMAF	1816.28	1948.82	2101.67	2237.93	1982.66	2053.13	2433.96	2540.05	1930.21	2240.99	1594.46	2568.82	2288.84	1999.19	2795.03	2424.09	2560.67	2409.9	2169.82	2002.29	2249.14	2109.84	2279.55	1881.61	2210.4	3189.07	3078.53	2099.94	2138.83	2876.21	1959.05	1813.88	1974.44	2586.06	2294.06	1754.92	1746.28	2761.22	2031.26	1746.04	2321.2	2096.15	1421.26	1519.11	1966.21	1769.86	1689.82	1386.07	2222.52
ADSS	2728.63	2740.65	3353.54	3091.68	2630.86	3074.05	3653.22	2686.52	2628.55	3107.99	2525.45	3206.16	3135.46	2929.03	3532.19	2849.89	3057.05	3105.39	2953.08	2902.53	3219.87	2717.38	3255.93	2861.42	4030.29	5264.19	3507.23	2761.94	2689.84	4050.55	3275.63	3457.26	3147.4	2720.76	2837.59	5395.36	4326.05	2826.87	3058.23	2963.47	2874.04	4514.88	4627.59	3373.29	3686.76	4290.34	3340.67	4159.19	3317.13
STAP1	69.8008	147.007	127.45	137.781	88.1631	92.3156	178.661	68.6931	154.221	29.7304	66.9231	68.0004	83.6264	54.1426	224.464	19.7991	86.5777	78.2121	94.0756	119.254	107.735	138.784	112.928	56.4342	180.6	76.7779	107.171	46.0784	60.6864	74.4039	93.7672	109.059	37.9741	89.0477	123.072	327.402	212.497	170.371	141.123	74.1168	84.5393	175.462	100.569	105.636	151.604	144.537	81.1955	79.3033	181.976
TIMP2	28570.2	25501.5	25983	20401.9	23843	20220.5	32244.2	31706.7	20257	17096.3	36246.4	27694.4	37358.9	23956.4	26273.8	21050.4	23648.7	30386.4	18854.5	25649.4	19100.4	22518.3	23998.7	24414.6	12008.4	14927.5	23485.2	26319	22780.4	33188.3	25050	21043.2	25039.6	40005	31250.1	16953.1	17135.4	11055.3	21008.9	18417.6	27961.7	8596.16	10559.3	12720.3	17298.5	15030.2	16291.4	20162.1	18554.2
RFC1	3740.59	4160.45	3437.89	3729.89	4085.54	3956.51	2836.22	3252.58	4389.69	3029.84	3583.64	3427.68	3367.46	3571.79	2918.97	3596.53	3559.97	3760.91	3632.04	3711.65	3730.78	3256.57	3377.85	3633.27	2438.03	3564.13	3308.65	3837.25	3506.42	2319.23	3833.64	3812.24	3752.75	3457.08	3202.8	3109.52	2200.87	4379.31	3272.47	3506.48	3485.03	3334.75	8005.98	3568.42	2533.84	3413.51	2997.67	2997.12	2249.28
TBC1D23	2224.98	2424.47	2905.76	2476.91	2441.51	2719.47	2742.21	2168.38	3055.34	2408.43	1647.1	2396.85	2346.64	2222.48	2330.09	2113.16	2281.28	2476.84	2651.43	2536.32	2603.44	2288.15	2263.56	2326.25	2335.7	2549.08	2558.45	2247.35	2327.34	2413.6	2232.95	2335.13	2322.83	1962.13	2073.76	2466.31	1832.48	2169.17	1954.01	2152.42	2391.31	2011.84	2295.14	2400.52	1638.71	2131.16	2048.28	3101.56	2273.31
CUL3	3328.16	3769.41	3704.41	3434.68	3467.4	3544.56	4330.47	3459.65	3620.58	5107.14	3328.15	3509.29	3964.59	3815.01	5094.4	3697.53	3725.43	3806.1	3891.77	4032.74	4025.11	3290.75	3662.67	3799.11	4823.82	4420.66	3864.47	3557.79	3646.89	5322.83	3928.34	4664.45	3506.02	4225.07	3131.57	3454.17	3275.29	3385.59	3568.1	3651.46	3660.69	4205.21	3927.86	5197.97	3960.06	4116.71	3138.26	3276.18	3020.61
MYOM2	1030.63	243.999	198.27	250.192	131.243	2440.95	774.596	162.713	1244.46	177.642	1098.68	197.213	279.061	67.6676	463.909	1129.87	712.188	941.622	824.152	217.106	208.865	114.285	178.886	229.438	1345.8	119.218	1227.15	97.6171	200.241	193.654	253.438	266.61	129.46	710.409	569.655	140.145	321.158	36.1415	341.976	958.097	1621.71	159.063	98.5015	103.724	407.159	135.932	220.216	50.611	92.3319
OTC	74.5037	54.3338	79.0196	54.356	80.1471	66.3817	67.5727	102.272	71.8219	14.8468	46.069	47.6037	34.9176	90.256	21.2109	38.6166	43.8444	62.6162	10.2379	23.7802	27.8116	59.7852	42.9725	35.8274	31.3392	1.54225	109.216	41.5817	19.8921	14.2596	61.2887	29.8977	46.5112	25.7713	29.3177	19.1892	16.5929	13.3048	35.0154	36.2934	76.1078	7.66793	0.0155172	9.49434	18.8411	21.5874	8.03081	0.0624572	12.8991
CYP46A1	76.3337	63.216	26.8682	58.0871	42.0785	38.3264	36.7363	86.813	78.1827	59.519	44.9974	76.7517	311.132	49.3713	66.7356	24.7506	36.2025	60.8249	165.626	61.2868	50.0187	65.1444	34.9774	57.3439	43.8705	35.0572	52.5511	62.3804	57.9773	41.3839	38.9642	42.8666	430.303	23.5016	304.68	30.7025	74.3731	19.0102	70.0434	65.753	79.0095	38.6526	89.1418	37.1023	34.3458	39.9342	148.16	118.17	60.0329
ZZZ3	1831.19	2335.42	2102.59	1667.2	2136.95	1828	1661.63	2639.54	2172.13	1709.81	1358.69	1999.48	1969.37	1550.21	1616.24	1885.4	1601.95	2027.38	2026.66	1821.75	1742.67	1827.95	1861.82	1586.68	1589.16	2285.95	1492	1968.82	1676.62	1391.55	1687.94	1708.42	2357.55	1760.77	1753.8	3090.34	1742.74	4258.46	1915.9	1883.47	1914.96	2322.37	1905.36	2661.33	1384.23	1822.71	1735.34	2033.68	2007.28
SLC18A1	1.83845	16.2847	8.14415	2.79695	6.01061	1.17358	2.33326	14.6559	2.13033	3.71377	1.13378	0	2.99322	14.7593	2.13639	1.9773	4.38328	0.815994	2.05219	0	2.2538	1.09402	0.999112	0	6.25118	6.60762	2.11705	2.68968	3.61402	0.0532158	3.70633	7.04547	0.125621	0.0588063	2.44383	11.5402	4.76745	21.9829	2.07317	11.0293	4.78766	33.178	1.05331	6.65971	4.45513	6.47772	4.83122	4.63171	7.39093
USP2	182.442	102.372	390.389	215.529	144.267	114.876	634.684	107.556	61.3084	187.887	277.446	213.736	793.029	252.756	649.177	211.907	85.5183	543.46	189.177	344.948	171.089	175.133	205.869	227.67	992.845	61.1912	241.671	212.499	357.09	249.066	284.104	270.04	315.027	131.2	132.256	145.906	1200.16	313.146	564.442	96.8728	92.5815	234.785	59.1099	114.195	177.076	352.666	397.521	494.834	128.363
TUBG2	1401.11	1385.06	1122.64	1025.25	901.665	1289.93	725.421	1117.66	951.901	727.441	1751.18	828.738	843.528	1082.94	758.353	1147.68	1081.47	1155.4	805.763	1194.93	860.801	972.707	995.367	1332.13	877.068	736.311	993.965	1020.12	935.275	671.62	950.74	948.557	978.523	952.957	1068.73	835.217	737.976	1289.72	935.287	1164.35	935.723	937.543	863.532	602.494	845.357	620.174	952.622	1256.21	979.163
RPL26L1	774.553	534.382	795.083	786.273	615.136	828.449	702.478	528.957	680.386	654.889	774.193	648.028	756.846	649.886	598.423	701.084	930.247	638.961	1037.87	701.769	902.974	864.855	863.451	666.933	1208.02	693.84	956.126	647.511	752.21	913.487	711.196	837.501	619.997	879.249	887.759	982.098	959.95	1180.24	760.188	638.161	724.492	741.385	1032.51	1473.44	1001.38	1264.03	1031.43	1024.33	875.681
FLT4	6553.04	6371.17	4814.49	4600.51	4877.01	6585.9	4828.97	5662.44	4656.99	4386.16	6560.82	4320.54	6786.77	6541.59	5119.83	5514.61	3236.76	2933.22	4878.51	5064.99	6566.31	3763.75	3811.57	4360.28	2111.23	1107.31	4268.99	5050.92	3976.77	2223.66	4860.52	3664.55	6699.62	3102.3	5065.75	1199.06	1948.17	1282.07	4080	5727.48	6645.67	1509.5	641.705	1477.23	2591.34	1951.05	3486.3	2473.45	2302.88
NSUN2	2682.08	2996.29	2870.74	2730.87	2516.65	2779.15	3827.39	2556.3	2471.13	4237.35	2658.13	2942.87	2737.61	2866.83	3228.22	2744.92	2927.75	2520.29	3461.28	2969.82	2812.26	3014.2	2963.11	3047	2895.34	3527.38	3133.18	2688.68	3001.62	3933.7	2880.1	3394.37	2931.1	2860.08	2746.29	3472.41	2986.03	4555.38	2449.47	2707.15	2889.35	2868.52	3217.76	4029.11	2872.43	3408.13	3986.88	3041.92	2934.7
FBXO42	1699.92	1792.07	1886.31	1806.84	1751.23	1705.31	1419.85	1671.05	1848.85	1787.02	1869.68	1823.62	1617.9	1769.54	1480.68	1888.37	2168.4	2264.74	1755.69	1939.29	1527.21	1814.07	1818.84	1952.45	1564.1	1610.82	2199.1	1978.77	1856.98	1746.77	2198.62	1640.02	1583.93	1830.99	1851.83	2088.06	1682.51	2028.32	1641.9	1613.68	1753.78	1945.63	1954.08	1978.86	1744.91	1662.01	1224.05	2008.4	1535.24
MFAP3	768.944	1213.11	1333.51	1314.83	1317.43	1251.7	1794.5	1411.54	1292.09	1321.89	383.858	1459.29	2906.01	1418.67	1613.05	1221.95	1155.99	1294.48	2128.91	1200.86	1508.3	1078.42	1281.18	1066.74	1172.55	1226.7	1110.6	1229.93	1088.43	1332.51	812.381	1002.3	2534.38	919.047	1249.62	1205.79	1179.53	1094.58	1120.7	1182.86	1358.07	862.676	1281.3	1492.48	1108.7	1239.22	1745.2	1522.64	1215.64
MRI1	2062.08	2233.88	1832.46	1787.16	2006.71	3182.01	1198.7	2436.08	2137.26	1304.2	1420.1	1586.56	1571.5	2224.93	1238.14	1602.2	1621.67	1449.21	1691.27	1802.16	2139.16	2621.24	2122.65	2207.05	1189.27	2002.33	1581.31	1388.19	1805.32	1022.16	1845.79	1107.76	1762.45	1255.03	1936.45	1917.18	2250.34	1784.65	1907.65	2917.26	2014.96	2621.78	2069.14	1530.54	2028.14	2075.05	1588.24	2288.54	2570.81
METTL1	185.231	175.419	285.348	346.745	206.382	213.912	460.628	245.024	223.994	627.977	376.126	262.315	338.479	279.064	396.11	230.721	434.98	233.819	485.696	306.584	339.877	296.84	278.822	316.43	493.852	520.684	350.935	152.793	296.339	724.477	367.673	353.156	264.333	505.792	350.863	644.173	329.497	1032.74	201.906	300.912	249.75	501.42	837.607	566.33	538.877	546.827	864.064	1116.08	675.247
HOXC8	5.59082	1.73919	3.56892	5.6279	2.00437	2.29323	9.07768	13.7019	13.6542	1.83417	0.030513	4.85691	3.76081	1.51289	6.34396	0	2.22409	3.4493	8.16964	5.1109	4.45251	0.021528	7.9952	18.1643	0.0140946	1.56128	2.11921	1.7721	0	0.0559543	9.33261	3.83868	3.0203	0.0683492	0	9.58638	0.0722936	0	0.0121658	8.36914	11.2293	5.95501	57.9581	0	0.0428452	14.0326	4.78327	0.059489	59.3229
AGA	920.701	1028.73	1512.12	1341.08	829.532	876.885	980.948	1133.92	1087.13	874.424	863.038	1280.52	1134.13	1173.84	1168.22	1003.1	1423.32	1231.9	1400.87	1111.44	1197.32	1044.25	1260.2	782.558	1087.98	2221.51	1547.66	869.979	1049.47	1256.96	1328.64	1072.43	885.682	1140.31	1072.86	1748.21	1576.23	1349.66	743.71	921.454	1045.28	1216.2	1542.53	1789.45	1010.24	1119.52	1432.17	1535.3	2309.38
PI4K2B	1091.07	1258.54	1438.52	1526.64	1410.6	1293.33	1026.79	921.405	1535.07	1117.23	994.625	1161.02	848.825	1338.92	1132.22	1224.92	1598.63	1334.48	1462.22	1308.19	1315.05	1014.36	1439.08	1336.59	1613.15	1545.49	1315.47	1024.63	1319.55	1358.46	1174.5	1214.76	911.829	1053.69	906.169	1320.03	1238.59	1317.3	1218.56	1039.49	1045.28	1789.1	2235	1691.41	990.328	1561.7	989.951	8294.7	1378.21
BOD1L1	4213.52	4902.41	3130.97	3888.27	4294.93	2697	4406.1	4345.84	4781.64	4151.75	3222.87	4262.25	4631.74	4358.11	5631.36	3117.25	2650.56	3963.47	3885.63	3413.54	2900.02	3194.65	3324.88	3363.43	2202.06	3972.78	2730.78	4014.51	4201.55	3708.33	3270.98	4028.57	4821.14	3318.95	3176.83	3159.44	2937.59	3181.91	3682.43	3949.97	4769.82	3440.55	3034.27	4415.57	2605.76	4335.62	3671.54	2556.18	3076.04
MAT2B	5547.59	5035.1	5364.6	5313.69	5302.79	5826.14	3844.64	4601.73	5212.7	3854.05	5499.36	5193.98	4193.52	5222.54	3837.24	5874.06	5659.34	4652.87	4545.17	4670.64	5132.46	4384.09	5349.6	4777.13	4688.09	4482.74	5624.38	5366.55	4702.72	3803.96	5130.71	4978.89	5014.32	5063.3	5567.22	5136.14	5138.4	4008.07	4879.35	5035	5229.13	4913.09	4929.27	4302.27	5142.88	4141.53	4098.21	3966.32	4074.59
TLL1	856.483	595.845	493.527	858.438	837.547	881.347	1008.39	887.981	371.909	453.008	289.548	692.721	3175.06	901.935	1330.23	655.532	563.225	461.585	619.661	582.512	1035.13	564.848	567.639	441.903	367.55	192.774	549.531	600.477	359.751	170.058	316.571	453.301	3425.9	159.299	1689.99	181.427	448.639	268.397	710.709	735.333	799.742	150.454	143.076	257.932	234.61	422.774	787.016	119.505	461.883
EDC4	1483.93	2012.96	1783.1	1933.35	2214.09	1857.27	2490.09	1894.4	1861.53	3508.98	1664.63	1741.04	1935.12	1935.4	2424.34	1827.97	1951.47	2458.6	1984.74	1882.21	1609.4	1533.27	1612.97	1840.38	1922.23	2227.09	1876.55	2013.13	2179.62	2661.4	1947.92	1845.23	1599.92	2027.67	1673.4	2657.36	1984.76	2133.01	1950.92	2071.5	2082.62	1802.83	3025.96	2058.81	1847.82	1888.5	2409.23	2461.97	2760.15
TRIO	4840.04	6014.86	5498.3	6511.38	6523.04	4484.46	7290.4	7229.51	6229.04	6491.35	4444.47	6276.31	8670.96	6264.81	6656.62	5628.48	6665.21	6289.04	5516.57	4813.71	5435.69	5119.76	5337.6	5513.1	2921.46	5520.69	5681.12	6345.08	6516.21	6353.23	4972.86	3904.96	6939.26	4542.37	6162.72	6900.67	3883.36	5550.97	4979.27	5475.94	7314.22	5727.64	4335.27	7622.29	4880.66	6363.26	9058.18	5794.41	6800.57
VCAN	2603.86	2236.49	4109.13	2743.04	2961.47	2638.48	8626.46	4155.93	3726.23	5987.16	2253.52	5472.83	12070.7	3756.77	9264.14	1772.51	3263.06	2818.46	12340.9	1974.99	3787.45	3175.44	3713.64	3226.26	4167.08	5240.39	3882.33	3436.59	2666.26	7500.32	3556.94	4655.33	5261.06	5744.65	3670.1	2487.41	5446.57	10126.4	2242.43	3228.18	6396.19	1815.68	4266.85	7063.56	3265.23	3403.83	7874.67	7101.16	17286.1
CLEC16A	1793.94	1930.12	1945.52	2690.59	2051.79	1716.59	2692.93	2051.74	2335.89	2960.1	2683.33	1988.79	2052.25	2299.06	2427.52	2174.55	2712.97	2269.06	3417.3	1964.82	1759.35	2102.36	1897.79	2419.49	1629.88	2130.62	1813.51	2380.31	2350	3073.3	2366.66	1743.65	1945.41	3095.3	2117.31	2377.02	2200.83	2016.88	1732.55	1830.34	2310.71	1949.04	4931.3	4465.09	3578.27	3110.43	2963.59	2935.07	2805.4
MSR1	8084.42	7731.18	23701.9	30252.5	18323.8	9675.79	14533.9	17588.6	21363.2	16537.2	3295.28	26790.9	18582.4	20540.1	19419.1	24279.5	41471.5	20452	8177.22	19019	16745.8	15389.1	17055.1	20983.9	16833.3	14533.6	37589.7	17428.1	18593.4	41415.6	16713.3	10420.2	7880.24	19550.5	18009.2	5880.15	3324.92	6318.12	12522.3	7254.03	15544.9	3292.54	4969.71	4279.42	10782.5	8721.98	12014.4	7296.42	10225.8
CDH1	4139.95	5785.04	4353.2	6871.24	6664.31	4846.91	7718.99	4544.74	7020.34	10225.4	7668.4	4567.31	4185.87	7078.21	6717	5934.46	6992.84	6978.45	7596.41	5727.57	5011.43	6371.13	5435.54	8019.57	9118.27	17646.9	4444.47	6981.75	7907.36	8957.98	9500.1	8552.45	5946.4	12992.5	4399.59	24788.9	14999.5	10975.3	6557.31	5958.15	5017.08	11152.5	36069.1	16588.6	16826.1	12609	28101.9	36423.1	29294.6
SKIV2L2	2847.8	2931.27	3174.96	3206.96	3103.73	2881.57	2840.78	2813.12	3204.32	3070.78	2002.39	3129.41	2938.44	2828.55	2935.91	2817.21	3049.37	3051.49	3164.74	3026.89	3119.91	2685.34	3217.95	2700.96	3078.06	3975.28	2986.08	2908.45	3042.4	3093.42	2783.54	2690.15	2679.98	3141	2479.13	3862.19	3054.47	3050.56	2962.43	2875.81	3054.62	3315.83	3203.24	2572.8	3037.26	4087.56	3200.89	3264.66	2397.09
DNAH5	187.084	86.3347	109.422	346.722	89.1657	206.055	192.597	146.434	67.6471	293.928	132.742	463.428	138.305	715.322	89.0008	518.88	197.281	112.074	434.585	385.757	377.676	212.514	604.615	204.332	7749.9	1579.24	51.5124	1130.53	820.206	416.689	958.205	519.717	1552.75	235.408	169.93	1225	9702.38	701.469	3829.64	276.45	203.8	2846.43	269.549	2167.37	1415.15	1416.08	460.779	683.3	227.196
ZFYVE16	2751.9	3586.83	2962.26	3595.88	3282.06	2917.61	4072.63	4091.75	4012.53	4073.61	1984.85	3346.06	5181.77	3491.25	5597.46	2602.33	2736.02	3473.14	3326.31	3240.65	3639.71	3003.53	2999.09	3093.6	3385.03	4167.32	3705.81	2928.34	3000.7	5380.63	2453.92	3119.08	3854.35	2291.11	3026.08	3761.39	2527.9	2721.23	3116.93	3151.52	3835.66	3305.51	3510.09	4721.12	3137.95	2882.89	4536.45	2489.58	3303.29
FAM65A	8538.75	10455	8733.4	7062.42	7689.2	7851.14	8654.08	8667.26	7216.86	13592.1	10718	7558.77	9837	9141.25	14833.1	8361.53	7112.28	9970.86	5204.71	8718.73	7117.26	5235.09	5980.19	9192.11	5598.57	3825.59	7657.49	7728.75	6567.84	12905.8	6983.92	8129.27	7935.24	6989	7609.29	2908.87	4728.67	2910.63	6857.03	7840.14	8849.76	2336.08	2644.5	3170.54	5136.22	3552.65	5729.64	2666.44	3771.62
C6	44.6477	8.84823	117.527	70.2561	70.1304	126.101	32.1693	50.586	38.0654	106.955	35.1455	111.721	134.585	319.955	65.6958	112.883	129.318	35.57	57.2738	106.409	189.919	44.8821	368.766	59.1109	568.93	59.5658	69.371	232.454	322.721	240.703	434.639	309.922	644.613	182.649	37.597	46.0587	3501.61	30.4304	1159.67	31.948	32.1276	481.882	35.267	74.2183	132.811	179.044	17.7773	4.66805	57.23
RAI14	3617.7	3780.99	3724.16	3940.75	4721.72	3365.6	5107.39	3659.5	3447.32	3991.74	3000.27	3201.3	5154.35	4171.49	4573.31	3788.63	4076.05	3034.95	4766.03	3490.2	4343.87	4176.94	3259.93	3384.94	3718.11	3287.05	3311.81	3236.73	3654.14	2798.4	4287.66	4442.63	4677.44	2985.36	3846.83	8943.63	2785.34	3555.95	3166.39	3584.82	3587.31	3588.44	7098.96	8153.42	5738.16	7306.95	3420.29	7196.46	9127.5
SOX30	7.41417	34.8009	18.8328	16.8565	9.01748	46.008	16.0759	11.7196	16.9147	21.3947	2.24358	12.6206	22.0619	22.3331	24.3537	23.7664	8.80892	32.2272	25.5598	10.1581	29.9492	13.9009	32.9793	17.0126	35.4729	31.1318	4.22957	26.2449	10.838	24.7629	13.9054	13.2136	13.2113	14.1314	8.28678	14.381	20.1426	57.1325	16.4944	21.8639	18.4553	18.0027	229.915	8.54032	2.26839	16.2137	56.9892	32.1744	52.6814
PNKP	1734.38	1664.7	1326.32	1413.22	1523.81	1589.37	1642.13	1877.24	1167.43	1725.63	2076.91	1457.34	1490.88	1390.72	1889.48	1501.19	1737.8	1663.1	1708.66	1375.45	1688.24	1641.1	1608.98	1619.86	1942.05	1784.12	1439.46	1505.77	1815.3	1838.81	1383.4	1432.97	1348.76	1819.28	1799.89	1201.94	1974.12	2871.64	1600.7	1528.52	1806.98	1866.49	1261.61	2148.29	1775.89	1491.61	2268.62	2286.27	2501.51
PHLPP2	832.27	1237.21	1014.96	838.751	782.445	814.956	894.979	855.416	739.55	1224.24	798.325	872.463	899.864	984.072	1139.61	818.922	725.381	978.921	586.942	1008.41	677.543	754.894	674.571	902.713	660.938	410.188	802.739	777.745	832.869	1269.87	607.195	772.937	882.679	550.256	642.401	950.445	434.55	708.152	745.752	854.113	731.844	451.533	563.941	342.64	657.243	524.175	740.506	477.736	545.918
SPDL1	387.276	367.848	379.59	325.182	381.705	343.329	332.345	331.844	437.38	302.318	269.788	366.277	434.359	369.205	253.152	361.434	402.127	275.553	469.34	350.025	608.595	359.831	402.744	334.356	336.213	411.093	449.693	383.449	355.254	212.517	305.449	414.115	474.641	385.21	362.609	504.01	324.758	800.495	299.757	428.262	439.214	433.479	725.643	544.447	388.401	330.055	595.809	542.01	530.222
STAU2	1641.27	1702.11	1838.75	1499.44	1700.14	1755.96	1624.95	1582.43	1603.75	1561.89	1512.2	1559.36	1807.35	1677.83	1868.3	1508.12	1693.98	1697.88	1699.45	1752.77	1793.75	1690.22	1711.91	1653.03	1613.17	2736.34	1717.89	1459.64	1493.55	1519	1501.32	1466.26	1893.05	1355.74	1783.12	2981.85	1383.84	5189.35	1735.64	1581.62	1503.88	1991.2	1675.23	1697.11	1694.03	2328.52	1634.54	1837.33	1932.45
PQLC2	743.824	806.957	681.094	864.057	706.305	834.088	1057.67	852.704	761.735	1051.2	875.077	736.441	705.849	604.409	637.612	849.619	1128.56	1005.88	890.628	771.607	743.066	790.126	799.491	856.095	768.478	942.325	1085.36	904.371	788.457	1327.69	851.399	667.633	602.611	1231.56	862.649	978.263	717.918	1404.89	668.513	744.415	868.8	903.982	1044.94	864.255	908.428	769.005	827.412	1061.05	1053.06
CTNS	967.249	1131.17	1006.85	1151.76	1041.92	1183.03	1679.9	1260.52	1149.46	1218.63	1011.07	1248.46	1191.95	1141.13	1201.06	1197.19	1273.22	1166.68	1510.28	1172.76	1293.95	1257.78	1281.18	1221.84	916.748	1423.71	1152.62	1184.72	1246.14	1877.68	999.943	998.548	1149.83	1685.77	1093.81	997.457	1159.47	1627.61	929.114	1351.49	1432.22	1111.27	1116.48	1320.19	1458.32	1137.85	1033.87	1642.06	1585.15
RTN4R	263.442	439.129	364.336	301.753	234.434	314.066	309.428	608.622	301.109	255.8	377.226	281.747	282.911	334.11	258.445	399.064	460.179	532.979	220.876	229.903	346.542	332.071	307.804	358.57	150.375	664.591	360.392	443.158	278.207	637.202	318.453	212.941	320.903	736.358	445.528	572.17	487.674	177.01	280.188	393.671	538.351	417.979	461.319	366.436	555.466	349.473	433.987	636.175	440.599
PHF23	1584.48	1573.84	1619.78	1578.17	1134.09	1934.92	1528.7	1867.28	1621.71	1876.33	1897.09	1376.7	2131.43	1972.12	1442.55	1987.4	1641.39	1725.7	2115.62	1458.91	1983.67	1375.25	1573	1556.21	1951.45	1755.5	1705.29	1890.14	1295.96	2669.62	1717.66	1743.48	1527.31	2028.83	1817.48	1498.59	1658.91	2085.42	1076.41	1787.36	1750.54	1805.41	1748.83	2096.89	1732.75	1380.53	1908.5	2309.24	1434.55
CDH10	11.1449	51.8202	1.74142	7.46698	44.0794	11.3038	13.7949	5.37581	23.2388	33.5269	17.561	33.0479	22.8328	40.8528	42.3079	17.8227	28.4598	1.67089	14.3218	22.1474	24.4217	0.0279959	9.99337	59.358	8.37324	0	10.5274	23.5215	0	2.45455	9.25324	7.78846	43.1005	7.09967	37.0334	5.74091	7.16367	5.6876	32.9358	21.9568	9.60161	1.64792	4.1653	13.3158	13.2995	2.19762	12.9637	11.525	42.6033
INPP4A	2525.68	2944.64	2773.83	2840.53	2900.36	2230.98	2989.73	3287.88	3103.95	2495.88	1924.53	2670.83	2914.12	2848.51	3250.46	2625.11	2450.02	3120.19	2682.11	2460.51	2110.32	2809.19	2648.31	2763.72	1524.43	2891.53	2469.14	3049.55	2532.16	2456.11	2603.42	2211.36	2727.84	2206.81	2483.33	3011.61	1955.28	2732.65	2503.03	2579.04	3273.08	3328.76	4000.41	3060.15	3100.32	4081.08	2452.26	3009.72	3180.44
RAB27B	585.537	860.365	1277.86	1674.7	1642.03	1201.06	1313.27	982.886	1291.04	1010.24	685.412	956.98	608.411	838.835	1229.66	1115.99	1760.81	913.658	4852.9	1021.12	575.391	1261	1131.28	1145.62	1097.38	12442	815.364	1616.11	971.504	1764.46	1505.96	1323.93	797.209	2733.59	384.345	4420.95	2570.38	779.509	1098.05	1229.17	813.927	2601.05	3344.22	5796.72	2308.11	2833.27	913.515	2642.28	5020.59
PSMA4	5514.06	4883.66	7477.97	6359.56	5441.05	6482.38	4749.92	4521.24	6054.72	4925.71	5141.89	5416.47	5453.97	5303.06	4661.24	4972.95	5903.7	4770.22	7065.71	5328.99	7512.62	5205.17	6174.07	5090.87	7838.18	5445.5	7530.33	5268.86	5790.27	6171.47	5559.65	6119.55	4931.63	6106.39	6176.12	6033.77	5814.93	12462.1	4590.94	5077.14	5390.31	5348.32	5443.44	6623.81	4987.98	5212.49	5835.24	5066.39	5070.39
MYO16	12.0637	32.0187	82.5871	57.1595	34.0636	29.3224	145.338	86.8402	96.1128	21.3599	46.0817	21.3597	15.8424	44.6007	61.4327	25.7413	75.5892	84.3676	96.1073	52.7788	31.1469	36.3283	61.9605	130.094	32.3862	67.0217	85.091	31.6121	71.6057	36.6548	91.0185	68.3673	89.8363	29.3519	36.7811	27.8206	47.2896	251.402	47.3926	20.1487	43.4488	42.9532	33.1898	73.2884	43.1929	70.1111	33.2383	43.6918	37.8406
LSG1	1860.97	1859.75	2299.11	2639.05	1916.54	2235.47	2514.17	2579.84	1777.02	2794.51	1925.62	2101.49	2203.64	1956.12	2124.62	2472.61	2233.07	1983.89	2270.03	2360.88	2196.94	2150.41	2036.7	2075.25	2102.86	2497.61	2109.81	2167.77	2319.19	2415.95	2537.5	2150.25	2100.72	2310.98	1778.09	1801	2728.57	4129.95	2009.63	2308.41	2261.54	2569.24	2590.58	2259.65	1744.93	1833.5	2467.73	3285.28	2683.47
PARP3	1430.87	1380.55	1826.19	1983.97	1279.36	1875.26	1367.13	1480.25	1953.44	1391.65	2525.39	1653.6	1339.48	1541.45	1119.52	1757.66	2216.6	1670.93	1549.14	1843.06	1337.29	1713.7	1818.84	1950.66	1495.18	2061.2	1791.44	1681.22	1819.83	1438.75	1715.8	1497.67	1234.11	2093.19	1354.29	1824.05	2099.25	720.499	1206.2	1915.54	1498.27	1413.18	1879.44	1953.16	1317.83	1303.95	3036.83	1425.09	1571.27
TNC	1252.1	2279.25	2999.06	3277.24	1685.11	3430.87	5691.76	1761.44	1694.63	8624.54	2498.04	3876.54	7225.09	2835.71	7062.21	1708.15	1761.95	2212.51	2528.73	2570.35	2693.43	2670.4	2416.46	4831.85	4327.86	1468.56	2653.02	1944.36	1960.26	9004.94	4808.55	4207.76	2016.64	4750.79	1948.9	27001.8	4924.76	3446.49	1733.59	5350.27	2455.69	4894.98	10218.2	18076.3	10587.8	14813.4	31140.4	34569.7	13335.1
THAP3	768.98	611.896	609.316	521.046	603.114	924.081	377.069	628.448	666.644	459.527	1123.93	653.861	403.067	633.164	271.166	913.988	839.294	599.851	485.71	600.422	659.749	601.138	676.569	643.638	569.051	518.112	840.546	785.913	559.163	533.506	708.422	580.651	364.57	576.031	673.367	879.387	651.777	594.871	636.577	634.825	692.302	607.224	757.792	558.712	756.832	444.381	442.101	906.004	641.984
FAM65C	347.267	361.659	161.493	236.156	222.411	282.524	288.766	205.243	384.537	467.974	235.778	336.168	149.758	236.021	341.024	231.713	129.336	224.276	345.61	352.643	148.875	289.35	143.908	310.183	210.921	107.791	239.565	131.996	234.716	291.507	100.238	181.439	264.23	99.5737	130.621	85.4251	214.845	701.66	323.408	342.464	246.709	135.012	98.4955	81.8361	111.788	53.9678	204.864	122.91	202.311
TDP1	468.262	470.272	530.353	462.947	451.835	480.651	542.029	520.844	405.704	395.342	315.852	466.347	599.427	455.314	743.487	420.847	474.456	493.791	470.369	511.002	587.543	469.809	508.676	377.372	826.918	684.105	619.905	476.592	427.748	639.662	445.651	427.254	460.272	449.614	596.302	595.207	746.208	2051.24	529.455	378.485	491.578	559.913	588.825	539.676	469.181	559.772	629.09	709.672	650.3
AIFM2	994.249	1002.9	1234.8	1145.2	1011.87	1104.24	1359.07	901.513	1046.99	1526.57	1515.46	976.416	972.077	964.872	845.204	1028.85	1481.39	1014.53	2354.88	1175.31	1286.17	1080.55	1152.27	1310.6	1228.93	1555.31	1059.11	1052.67	1114.72	2317.84	1058.44	1015.17	781.197	2896.14	809.851	1246.11	1291.7	3955.83	1012.55	1031.07	1047.71	1192.99	1153.8	1289.73	1345.48	1023.54	1035.49	1365.36	1254.43
SPATA7	365.859	461.392	349.069	320.495	366.677	374.84	229.244	570.62	377.17	233.468	361.884	313.809	369.659	346.063	308.221	369.356	370.361	465.999	371.182	350.021	404.291	355.562	517.671	369.322	686.999	438.887	258.489	413.297	381.539	252.635	381.594	417.831	416.65	258.805	381.873	376.317	645.823	491.128	431.598	380.19	392.449	505.742	626.133	462.581	393.935	374.272	351.885	567.273	499.732
MED17	1443.91	1197.96	1506.72	1042.1	1249.31	1368.75	1758.98	1275.89	1302.65	1658.66	1263.28	1232.91	1469.6	1312.59	1554.8	1424.94	1277.61	1343.17	1358.95	1491.3	1202.89	1405.13	1257.2	1434.3	1389.72	2236.98	1433.15	1220.88	1288.73	1639.34	1212.56	1357.11	1493.85	1129.78	1363.51	1790.45	1307.06	1320.16	1396.75	1250.29	1353.19	1591.25	849.03	1738.05	1443.95	1248.94	1159.85	1400.96	1240.56
RETSAT	3034.91	3599.29	3559.94	3727.08	3993.37	3612.09	3405.73	3422.58	3577.26	3189.85	4190.03	3383.96	3038.82	1873.93	2736.8	3811.41	4884.66	2576.78	4256.81	3285.79	3255.42	1622.98	3737.62	4657.03	1846.02	10300.5	3470.46	4685.57	3797.34	4395.19	3827.14	2823.35	2996.49	7196.13	3103.95	3340.89	5274.08	2774.52	2786.29	3574.76	3834.01	2791.98	2327.29	3606.49	3310.57	3002.61	3876.36	2852.44	3154.56
CAPG	10603.6	15916.7	19655.5	20536.9	12656.4	11270.8	22068.3	22502.3	12054.5	11488.7	17463.1	17161.7	17007.8	12892.4	16596.5	16299.2	30481.5	24447.7	13273.5	13638	18197.4	19767.9	17758.7	16933.8	13462.9	27248.9	35300.2	22348	16771.7	49227.5	18037.3	13356	6053.98	39522.6	18532.6	17665.5	9619.17	11909.1	10547.7	11339.7	24874	15566.8	11993	11702.8	30151.2	16092.6	15403	14136.9	24384
AP2S1	3714.52	2454.72	3450.46	3229.44	2689.97	2964.88	3569.59	2918	2418.31	2513.54	5037.67	3258.62	4128.93	2768.72	3273.77	3051.9	4399.27	3167.11	4466.43	2704.07	3690.8	3587.56	3425.82	3643.13	3456.03	3057.4	4893.08	3260.25	3203.71	7030.52	3697.15	3457.34	3006.64	7658.65	4968.36	2849.34	2659	4359.3	2582.35	2564.66	3739.66	2112.43	3377.41	2630.85	4641.65	2968.11	3754.38	3771.1	4196.53
USH2A	11.1765	10.6919	1.74433	15.9628	15.027	14.5871	8.0469	0.858285	12.6667	13.0398	3.33306	3.87405	8.33071	4.7054	2.14671	9.90201	0.0358608	6.9218	1.03333	7.63492	6.69373	9.6133	19.9878	7.14685	15.6414	4.83343	14.6907	8.12323	14.5348	1.26604	16.7531	17.9358	15.7602	7.05323	4.97201	1.9011	29.126	1.88075	14.4049	9.27792	11.3262	12.0829	27.9149	0.929047	4.46394	0.028764	4.81343	0.0538216	1.81109
TG	59.6049	19.546	37.6762	38.4158	19.036	21.4397	61.8232	45.2144	53.869	51.1746	37.2978	17.4746	86.1938	21.4454	62.4645	21.781	60.2302	50.4409	46.0132	40.0159	79.877	30.982	22.9851	30.4505	38.6376	36.7489	33.6333	9.89574	36.2359	36.6161	38.0578	31.6439	50.7489	51.5365	48.5469	7.65786	48.4435	55.2005	54.5958	51.4055	41.8555	42.9693	282.848	59.9643	31.0252	59.3212	52.8089	72.3184	106.288
ADAM28	184.292	259.137	184.805	261.436	412.763	203.804	579.865	588.654	449.024	203.689	54.8832	241.905	378.718	227.965	607.947	216.856	176.463	430.295	605.343	373.831	276.614	372.664	290.815	194.471	1126.57	9795.02	257.447	441.302	309.907	345.888	246.007	275.891	421.163	4090.17	295.564	1408.35	2799.3	1849.38	1255.64	789.075	449.625	3992.11	1897.06	1343.03	733.639	659.014	768.845	302.091	1229.48
BARX2	16.718	20.4242	34.945	31.83	20.038	11.3267	13.8338	1.7613	26.4432	52.9958	23.0822	38.8484	10.5148	24.6084	10.6244	21.7796	52.634	16.4438	24.5533	8.43471	24.4965	14.9866	33.978	42.0829	625.151	1591.49	62.0089	8.99055	72.4776	31.962	40.8176	33.7202	64.0282	245.923	3.2729	103.66	815.75	211.279	248.255	42.0673	7.96342	1057.27	264.361	146.556	453.665	765.709	177.911	246.953	125.586
DCUN1D1	1694.33	1587.2	2026.3	2026.14	1854.42	1739.09	1650.17	1816.63	2447.86	1600.96	1276.45	2048.06	2025.66	1900.32	1849.24	1724.98	1840.81	1970.86	2018.48	1707.61	2093.63	1982.77	1921.78	1514.96	2065.26	2156.8	2240.08	1803.31	2127.97	2035.92	1896.85	1898.79	1901.81	1859.11	1746.26	1709.8	1387.38	1962.63	1620.28	1602.7	1703.78	1894.86	2686.99	1679.02	1440.66	2027.62	1747.53	2026.79	1727.37
JADE2	4204.21	5359.33	4250.03	4472.12	5926.94	5454.68	3547.84	5362.24	6363.19	3481.94	3445.48	4510.97	3702.9	3666.67	4267.23	5147.23	3861.3	4718.09	2898.89	4088.94	3535.32	4725.75	5001.82	3685.25	2253.23	3880.41	3109.03	5011.14	5162.23	2745.3	4021.18	3056.33	4188.3	4796.35	4382.09	4707.01	3452.38	2647.93	4555.91	5038.41	5508.06	5385.36	3179.41	2811.7	3057.2	4686.15	3939.74	3342.77	2739.79
ZIC2	3.76495	0	0	0	0.000376609	0.0243353	2.27442	1.80849	0.0112463	0	6.43542	1.94411	1.5028	3.28102	1.06963	0	1.11186	0	0.00454876	0	4.3573	2.12988	0	0	0.00882786	0	2.09764	0	0.886147	0.0341947	13.2926	3.36177	0.0777831	0.0749064	0	26.8617	9.54677	143.785	6.19688	31.9707	0	11.103	2.0919	1.87934	5.59061	5.4355	73.9892	0.0651143	7.34735
LCP2	2629.94	3874.52	3897.36	3437.49	3194.9	3302.56	4820.91	4118.87	3705.1	4930.39	1781.99	3379.1	4266.6	2843.67	7750.65	3012.29	3131.56	3314.03	4599.36	3475.72	3832.97	4327.49	3464.8	3126.76	3667.99	2988.74	3918.05	3161.66	4011.23	8593.11	2861.52	3599.73	2810.69	3863.32	3052.85	2472.06	1733.34	2978.21	2598.83	3732.42	3940.4	2394.58	2682.86	2118.76	4087.29	3915.02	2691.21	1860.33	3555.47
TRIT1	701.934	678.693	698.156	821.889	790.46	773.299	530.612	696.262	757.503	733.968	662.352	792.796	590.98	694.557	475.57	678.308	724.275	774.606	737.249	761.4	800.803	742.075	689.561	729.693	1208.02	1009.38	789.075	769.616	807.502	546.505	712.126	730.36	837.638	571.373	690.928	1209.64	1137	10943.6	814.777	734.296	562.487	1064.85	1751.91	802.383	954.897	712.925	608.731	7287.3	895.09
ADRB1	2698.87	2590.17	2114.25	1683.12	2403.44	2233.2	3853.64	1248.74	2444.7	2862.43	2371.9	1542.84	318.582	1712.9	1978.46	2240.9	1675.36	1826.53	515.37	2837.87	1644.94	2782.47	2563.37	1949.75	2391.02	147.008	1907.02	692.698	3510.12	1475.35	1440.96	2719.36	358.839	1625.92	736.194	139.181	360.196	80.8768	2149.66	1805.29	1406.57	177.969	262.291	503.503	726.962	823.988	217.733	318.157	321.423
GUCA2B	16.7497	30.3457	8.93147	8.40747	14.0263	44.8515	18.3405	36.2555	8.47592	20.47	56.8207	9.70462	0	7.88423	0.0241794	11.8798	8.80544	12.1318	0.00923888	3.32825	8.93097	35.1789	8.99402	26.9333	0.0180603	7.27097	96.4324	7.19065	12.6617	2.45397	0	36.2384	11.7552	75.8928	40.7938	1.90113	32.5906	15.2591	2.07414	22.1391	33.5792	0	4.16035	0	4.46376	0.0287346	0	0.0537644	18.5497
CUL7	1733.44	1768.03	1490.55	1444.15	1619.99	1708.68	1797.97	1709.94	1472.75	1287.46	1787.43	1461.23	1927.55	1739.24	1585.52	1715.08	1718.08	1581.37	1529.71	1452.1	1432.8	1664.59	1465.07	1536.49	1337.53	3194.07	1257.7	2201.26	2031.91	1424.59	2062.13	1312.87	1736.3	1841.56	2019.31	2790.8	2137.08	2753.6	1490.49	1892.73	1959.28	2645.79	2635.16	2902.15	1946.3	1902.52	2718.1	3990.3	2594.79
CTNNA1	21052.7	19423.4	20511.6	20552.8	18752.6	19387.5	19883.1	16151.7	17851.4	23768.1	31170.3	19052.4	18730.7	21162.9	17478.8	22430.8	22534.4	19415.7	18929.2	20895.3	18864.9	18229.3	20011.3	23278.8	19138.7	23255.6	19473.6	20921.7	20377	24388.4	26426.1	22403.8	20974.7	25899.4	19749.6	22170.9	19410.6	14945.4	17918.7	19170.5	18837.2	16522.4	17198	11771.3	20994.1	16925.2	23189.9	20288.4	13877.3
PHKA2	1374.08	1776.05	1295.81	1458.21	1799.32	1287.73	1638.69	1879.04	1685.1	1703.3	1342.24	1589.48	1540.33	1595.69	1774.04	1543.77	1630.42	1792.65	1523.58	1772.37	1323.96	1750	1532.03	1757.03	1323.95	1614.11	1418.45	1747.25	1779.04	1649.98	1526.39	1453.29	1660.81	1449.34	1514.29	1993.99	1494.77	918.482	1386.45	1510.84	1711.1	1979.22	1198.37	1460.11	1597.74	1628.56	2590.6	1214.95	1393.91
CNTLN	760.601	622.586	595.854	645.699	562.038	693.374	696.725	533.489	712.069	476.273	384.937	663.578	894.621	569.351	784.806	501.055	587.314	651.154	803.708	684.757	704.169	569.109	640.592	604.19	542.95	375.875	611.511	523.61	654.335	640.882	576.567	551.101	837.551	458.945	613.942	403.201	462.862	384.519	584.037	519.34	678.668	257.978	635.461	383.575	406.101	402.308	452.708	296.326	429.522
EPHA3	245.752	269.853	543.867	198.652	282.522	443.467	653.064	460.287	110.962	138.573	296.096	428.464	1229.89	242.363	243.618	181.208	177.548	291.213	341.528	141.306	255.488	605.356	313.8	146.965	259.998	600.816	188.096	314.707	121.393	62.6563	480.967	421.42	548.537	333.726	341.651	963.882	570.307	393.08	278.128	399.572	304.566	387.868	42.5227	992.782	464.749	211.432	215.297	211.37	317.731
HSPA5	15500.4	19154.4	19703.1	23938.8	18802.7	18686.3	28825.9	16595.7	17003.1	20982.9	17256.9	21636.7	30448.1	22556.8	20861.7	24342.9	27628.3	17794.3	39494.3	19348.6	25313.5	22256.8	22072	24017.5	19427.9	46326.7	22039.4	16714.6	20860	28590.1	25004.6	20843.5	25518.6	31791.5	20211	74696.9	23231.3	39626.8	20303.3	25019.1	24032.5	34277.4	39347	44729.5	37446.2	56210.1	38388.1	35550.6	26123.4
DSG2	2614.12	2874.26	2815.09	3456.24	3861.13	2725.13	3082.57	2488.48	3932.23	3843.84	2764.5	3076.94	1941.89	3293.48	2394.71	2852.86	3324.39	3012.36	4926.56	2595.91	2181.42	2740.87	3082.04	3540.05	3984.35	8562.09	2306.3	3324.47	4266.82	2780.68	2900.52	2375.96	2771.45	5744.65	2084.59	8016.23	5239.95	10977.3	2832.65	3406.92	2762.78	5951.28	4309.36	6747.55	3955.66	3573.16	8669.64	6274.39	5147.98
GEMIN8	897.444	857.735	688.275	775.022	751.388	844.215	640.615	808.392	864.207	664.188	920.031	823.884	671.614	742.398	623.843	869.424	901.771	738.075	871.2	880.642	796.371	908.634	856.455	916.165	1061.86	939.876	859.472	1044.57	823.808	581.916	920.112	769.222	856.547	803.134	860.145	1240.36	985.884	535.851	768.424	672.75	930.882	987.435	596.086	1269.76	842.04	873.61	1177	737.255	691.859
OFD1	1983.88	1688.75	1392.73	1531.31	1992.68	1383.4	1547.03	1446.78	1919.63	1892.15	1381.72	1597.25	1446.74	1515.13	1658.6	1665.57	1434.31	1591.8	1443.82	1315.82	1596.06	1931.51	1741.89	1726.54	2668.74	2579.4	1422.65	1540.13	1860.61	1222.78	1926.57	1963.38	1836.45	1228.12	1540.23	3171.95	1713.21	1243.05	2084.82	1633.07	1586.12	2903.04	1304.11	2947.85	1516.99	1874.47	3287.19	1227.6	1700.59
GPM6B	2910.21	2079.78	1866.57	1386.04	1694.13	2448.17	1336.2	1978.5	2133.04	1855.86	2730.45	2206.43	1948.83	1732.05	1474.32	2301.3	1394.87	1682.22	947.899	2761.23	1610.51	1297.31	2145.63	2013.41	1664.33	543.388	1318.64	2072.83	1197.17	1122.48	2085.34	1708.41	2306.74	1243.28	1571.31	554.878	1015.42	285.517	2046.69	1800.12	1557.2	485.05	247.78	762.403	767.922	958.816	928.208	488.105	399.939
MAGEC2	0	0	0	0	0	0	0	0	0	0	0	0	0	0	0	0	0	0	0	0	0	0	0	0	0	0	0	0	0	0	0	0	0	0.0748863	0	0	0.0792522	49.4836	0.013224	0	0	0	0.0161252	0	0.0467741	0.034516	0	0.0650971	0
PREX2	3647.51	3157.52	2105.25	2089.84	3526.51	2656.46	2985.16	3911.82	3024.72	3027.06	2268.85	2764.1	9419.15	3085.35	3598.91	2549.85	1675.38	2127.32	3163.72	2688.76	4109.49	2192.06	1963.75	2055.51	1030.57	777.945	2079.35	2503.28	1992.9	1091.82	1633.14	2150.41	9259.63	855.841	3920.1	816.008	962.315	498.725	2730.63	2935.88	2634.91	614.074	369.067	1917.01	1709.47	1008.43	2690.64	1234.45	1448.43
WDR37	1150.64	1776.94	1139.65	1893.07	1539.84	1431.8	1592.86	1834.73	1625.93	1726.56	1618.56	1649.72	1929.09	1530.3	1642.71	1753.7	1554.82	1671.8	1608.45	1379.71	1456.12	1597.32	1459.07	1592.97	1226.85	1261.83	1430.01	1809.65	1498.99	1865.94	1624.81	1536.45	1672.41	1737.28	1339.24	1281.63	1447.53	1365.85	1329.8	1465.32	1861.05	1402.02	2595.73	1076.51	1233.73	1598.35	1491.54	1448.02	1022.56
YTHDC2	1438.31	1637.97	1871.95	1768.41	1715.17	1427.3	2254.03	1988.45	1835.12	2200.07	1064.82	2186.02	2285.85	1634.75	2216.75	1549.71	1714.8	1973.48	2153.45	1762.13	1631.61	1852.51	1504.04	1662.88	1380.34	2250.81	1430.01	1616.1	1970.27	1960.38	1566.31	2161.18	2104.99	1125.1	1321.62	2406.8	1616.39	1624.74	1526.54	1719.92	1781.19	2130.58	1721.87	1648.57	1791.38	2165.65	2997	1831.56	1616.54
CTPS2	1196.28	1181.06	1104.68	1100.22	1095.02	1207.77	921.358	1081.48	1238.2	970.249	980.359	967.674	942.426	991.209	1011.48	967.456	1130.78	1010.19	1072.64	1030.53	1183.98	1035.7	1160.26	1084.69	879.157	1363.25	909.914	1083.43	1008.69	863.979	1036.16	1050.2	1287.64	1066.56	1095.48	2144.72	1317.68	1120.27	1159.84	1126.35	1050.13	1816.64	1133.06	1634.3	1100.96	1077.46	2121.54	1135.72	1066.9
ATP6V1H	2051.82	2132.31	2294.62	2116.1	2002.7	2175.82	2207.08	2247.06	2091.85	1665.14	2762.28	2109.26	1982.26	2021.52	1879.97	2450.83	3038.39	2508.14	2547.13	2308.07	2343.54	2108.77	2303.53	2352.26	1887.77	2719.1	2997.63	2289.86	2010.13	2710.99	2345.3	2233.43	1784.3	2773.39	2165.04	1823.08	1913.96	3537.9	1790.24	1840.45	2169.64	1623.89	1186.98	1437.25	2521.65	1615.65	1783.27	2025.66	1645.15
POLR2B	3794.58	4289.58	4725.65	4988.5	4589.47	4787.22	4058.91	4070.03	4848.21	4857.81	3358.86	4650.88	4377.63	4186.62	4297.95	4422.38	4458.46	4572.03	4940.88	4156.22	4711.51	4199.37	4451.17	4193.54	4421.84	5525.64	4222.76	4548.99	4272.23	4368.08	4626.55	4232.01	4282.67	4237.96	4057.93	4955.66	4825.5	7978.13	3837.97	4232.37	4718.96	5027.51	4245.08	5030.44	3476.55	4595.57	4603.82	4595.56	4233.49
FAM214A	2468.9	2573.23	1935.65	2329.77	2422.47	2006.98	2476.36	2156.63	2425.69	1792.59	2192.08	2200.59	2712.58	2442.61	2272.89	1715.08	1851.77	2505.54	2512.37	2315.73	2060.33	2205.93	2132.64	2010.7	1780.23	2656.17	1835.58	2378.5	2256.65	1591.02	2471.58	1939.55	2528.9	1223.46	2292.36	3493.55	2174.87	2849.73	2386.63	2268.77	2314.72	4326.58	2452.71	4090.05	2001.63	2782.57	2661.18	2638.83	2263.15
ARAP2	5090.49	7475.67	4332.59	5336.19	5386.95	5022.47	4441.65	3398.16	4821.8	8219.82	5243.85	3619.07	2588.46	4223.3	6485.02	4053.02	3492.06	4709.39	3013.42	5013.04	3009.98	3088.95	3811.57	5011.11	4562.8	3219.2	3393.77	4054.29	3974.05	8252.1	2830.87	4209.84	3718	3037.94	2916.38	2392.38	2192.57	1759.89	4222.16	4943.27	4299.99	2213.12	1984.15	2655.62	2147.67	2542.07	2854.65	636.248	1965.7
TPR	6537.19	7202.17	5730.72	6497.32	6788.53	5518.89	6971.85	6484.39	7555.97	7163.93	5388.62	6517.25	7125.2	6961.8	7813.18	5095.74	4836.5	6003.01	6965.5	5567.46	5793.33	5203.04	5740.35	6007.94	4415.59	9129.87	4751.27	6648.04	6646.71	6100.68	5180.83	6387.67	7300.75	5663.87	5156.79	8261.04	5538.66	5508.13	6297.73	7541.59	7745.43	9385.89	9703.01	7296.76	4985.77	7587.36	8173.8	6773.9	6420.91
CP	80.024	93.4615	242.237	581.95	871.61	319.742	150.201	705.286	449.034	363.694	190.861	203.041	316.307	889.125	397.204	545.614	1409.06	356.373	1277.14	1054.38	504.3	376.943	952.394	536.026	5582.68	7750.81	99.8449	1324.02	879.08	1036.26	1875.56	1244.15	936.439	1634.39	97.9155	17753.8	9177.53	1814.13	2345.44	2444.92	194.948	21852.9	39613.3	739.548	2475.23	990.123	385.993	30304.8	8803.23
KIAA0556	1018.45	1465.18	1293.12	1469.46	1375.54	1109.89	1549.31	1375.35	1223.42	1435.38	1310.43	1435.97	1567.73	1716.14	1514.56	1358.6	1600.84	1568.34	1495.97	1383.97	1208.45	1236.44	1433.09	1344.65	2946.46	2023.62	1210.41	1830.46	1788.11	1463.51	1440.04	1277.69	1537.41	1741.99	1151.6	1524.52	4362.3	1425.81	2545.23	1599.37	1508.77	1623.08	2709.77	1587.66	1577.83	1997.39	1724.83	2084.14	2090.45
DTNBP1	1138.56	862.17	1064.3	1061.8	926.711	1001.81	856.044	987.433	775.476	919.084	1107.55	972.532	1128.83	917.837	865.321	1218.98	1252.39	1105.84	1087.98	965.795	968.528	860.602	1025.35	944.834	1054.56	1165.44	1325.97	1028.26	947.057	950.119	1254.37	1155.48	964.014	1070.05	1243.76	1111.71	1024.88	1805.61	909.542	997.36	1025.16	1154.29	1165.2	1031.78	1127.5	957.742	755.858	1431.93	807.323
XK	210.386	195.93	193.814	153.672	332.614	225.135	152.46	135.6	188.068	124.625	120.667	173.902	126.169	192.142	132.415	327.77	207.106	194.712	116.579	246.987	179.959	277.602	165.894	185.538	206.743	1294.68	188.087	199.848	483.144	108.667	243.256	157.432	138.092	385.185	120.518	662.438	212.606	130.372	272.974	214.079	132.88	191.744	433.32	320.755	402.766	700.991	387.692	677.428	160.691
ANO2	151.715	288.571	239.576	355.187	252.467	227.41	420.52	302.011	469.056	186.955	377.213	372.112	722.179	407.543	346.333	250.527	66.8931	147.732	383.447	242.693	406.486	207.162	200.872	261.74	101.303	65.2776	202.802	426.89	233.796	266.769	206.095	144.608	1177.47	65.6155	280.05	52.7847	129.833	34.2401	214.216	157.743	428.687	45.5223	37.3379	63.7563	70.8448	114.316	180.59	79.2666	83.122
C12orf4	739.163	938.782	1153.16	880.92	870.608	1009.68	970.615	970.256	1023.74	806.519	712.807	1018.2	1170.7	852.445	955.339	888.238	1040.93	964.125	1389.62	872.957	1140.66	1016.48	862.451	869.531	984.606	1079.63	948.784	751.508	846.456	1450.44	818.893	784.092	829.03	864.02	824.947	824.652	743.896	1106.96	751.946	965.328	1053.39	612.361	1022.14	978.477	991.412	982.542	926.582	893.421	1027.19
SCML1	845.304	906.724	722.377	955.903	766.415	576.355	1040.49	970.266	909.635	1022.36	460.607	952.134	1052.79	755.951	1366.25	582.254	516.118	961.53	951.979	1042.48	805.259	958.817	760.516	822.921	877.062	603.909	742.853	668.306	909.91	1081.07	656.407	1003.84	1087.28	263.493	793.191	1449.69	468.787	355.958	569.622	823.746	717.325	551.323	597.114	964.228	735.793	710.74	1301.51	342.261	595.803
WWC3	7907.56	9573.21	6664	7754.99	8515.72	6848.23	8588.75	6760.18	8848.06	8942.59	9517.22	6564.86	7615.8	9367.75	8883.96	8627.9	7550.56	7541.8	10317.4	8546.7	6218.73	7556.3	6228.04	7903.92	4705.86	4882.35	6375.64	7719.72	9025.73	7505.16	7168.69	6618.87	5454.31	6340.49	6019.53	8133.37	3440.6	4462.09	6293.6	7091.4	8143.65	4001.33	3853.23	7167.32	6406.43	5594.27	9547.58	5917.24	3854.75
ARHGAP6	2415.85	2186.67	1945.54	1603.47	1810.34	1919.17	1744.12	1894.41	2037.96	2423.34	2012.23	2013.08	1415.54	2208.98	1597.18	1791.33	1570.17	2721.19	917.223	2334.5	1721.57	1569.57	1862.81	1982.93	1322.91	533.581	1819.81	1873.85	1562.42	1540.25	2077.91	1968.98	1229.77	1380.15	1421.44	670.09	765.109	295.037	1632.6	1599.51	1908.8	291.514	200.094	649.139	867.471	593.207	498.191	579.943	484.01
FAM184B	27.9258	25.8184	21.5136	52.5317	43.0787	16.9282	17.239	14.4288	35.9083	25.108	19.7654	25.2571	19.7101	35.9295	20.1393	18.8115	25.2134	57.5088	18.4127	27.2445	25.5584	33.0913	16.989	27.7848	14.6355	21.2053	15.7796	38.0111	34.4546	7.17645	28.7813	36.7734	26.1752	21.1265	20.8866	146.079	26.0114	28.5479	16.4932	24.4124	27.3709	28.365	35.2443	36.1732	13.3275	23.7474	31.6904	43.5931	56.4008
MAP4	18312.9	17802.3	16226.6	14242.9	14814.4	15301.5	15466.6	14353.2	14981	14182.7	32394	14767.8	16270.7	16196.3	13090.8	14898.1	13522.2	15039.3	11690.6	15509.2	12847.3	12131.5	13366.5	16378	8297.62	7089.8	14239	14845.3	15338.9	14625.5	15308.6	13770	14063	19132.6	15899.4	9237.37	9666.36	7061.49	13756.3	14001.5	16600.7	4672.21	7440.03	8095.33	10492.6	7625.14	11264.1	7590.39	8329.34
GOPC	2406.53	2591.04	2437.31	2181.7	2545.7	2462.83	2318.23	2356.48	2859.9	1923.76	1985.93	2684.44	2330.68	2264.76	1690.39	2249.81	2042.42	2297.74	2567.58	2185.42	2289.12	2476.06	2386.48	2208.82	1764.57	1930.37	2176	2265.44	2170.55	1626.43	2091.83	2177.99	2778.57	1505.58	2222.86	2336.7	2281.11	1777.02	2572.03	2482.95	2609.75	2393.76	3857.34	3033.5	2104.52	2882.86	1484.15	2099.14	2022.05
ROS1	2404.63	3202.9	2740.59	5710.11	7580	3447.78	4329.36	4092.63	4805.96	6290.42	1337.88	3586.04	3263.19	4972.12	4451.53	3404.42	6397.84	5293.61	19600.9	3653.7	2852.27	5550.04	4924.87	3442.3	2582.12	13870.3	3010.27	4696.39	7365.43	4519.17	4590.33	5583.37	3064.79	3001.75	2526.82	4977.73	1074.53	1481.95	1891.19	5556.04	4382.02	13056.2	4876.4	23499	6753.88	23142.6	3589.36	7478.94	5959.04
USP28	1405.76	1161.47	1073.27	1093.66	1261.33	1387.85	849.173	1067.91	1252.99	976.761	831.235	1082.32	984.269	1003.97	724.464	1370.48	1023.41	1013.67	1286.35	866.131	1106.24	990.86	1058.33	997.724	1156.88	1600.3	923.573	1047.25	1083.01	723.549	976.736	858.057	1199.13	1005.69	1170.02	1608.05	1458.17	1529.56	1402.93	1253.67	1368.52	1623.08	1041.84	1365.87	1096.54	1175.6	898.099	1685.72	896.922
HDAC9	1011.04	797.174	487.248	1171.48	565.044	721.525	1519.36	1030.88	472.269	628.842	327.925	819.03	1257.54	827.77	1196.78	564.43	427.365	1131.98	404.933	368.714	459.862	1042.08	479.695	420.389	569.055	610.468	747.048	413.259	474.862	389.557	675.915	475.441	1145.2	400.462	1031.88	1222.13	444.022	384.509	625.25	800.925	840.606	1556.94	486.203	970.87	442.636	1038.61	464.853	400.833	861.841
TSPAN17	2892.48	2884.06	2736.13	3221.02	2707	3223.74	2651.71	2483.06	2575.72	2648.44	4010.18	3047.8	2269.01	3031.12	2281.38	3392.54	3470.11	2542.02	3698.5	2822.48	3240.97	2762.22	3338.88	3350.9	3021.68	2993.68	3306.54	3168.92	2765.98	3301.12	2478.99	2366.67	2050	3631.53	3077.14	3882.35	2649.53	2589.87	2442.26	2757.75	2557.29	3802.67	3208.43	3357.11	3667.95	3918.26	5407.78	4079.95	2916.23
NOP16	295.095	178.978	284.442	337.365	228.423	280.315	627.896	227.833	250.407	1019.68	405.739	325.468	321.71	316.543	613.207	325.785	352.834	312.943	454.003	286.124	384.305	342.752	269.828	333.456	787.223	332.596	391.913	195.301	337.121	856.65	313.805	456.586	233.905	326.69	322.397	417.602	393.222	709.113	242.076	311.887	268.302	350.889	504.852	564.437	463.629	364.564	494.173	847.38	403.654
CC2D2A	1062.22	886.215	1146.86	993.377	1024.89	1216.78	933.966	846.354	980.428	851.168	970.494	1181.42	1199.57	1034.27	951.109	1041.72	1093.53	1124.96	1208.64	1228.14	950.766	755.973	1170.26	910.76	3521.71	723.225	914.118	1274.26	1253.4	605.541	1291.5	712.102	1662.07	871.04	1001.7	1022.42	4881.45	730.977	2225.91	1081.69	1112.24	1021.83	478.949	1112.69	860.857	907.049	625.8	847.491	636.427
RRM2B	3766.65	3886.98	4557.84	4714.85	4435.19	3851.86	4209.02	4271.68	4625.29	3745.21	2746.97	4368.15	4434.69	3866.83	4590.26	3938.16	5123.54	5025.86	6141.33	4406.63	4088.43	3674.06	4107.39	3975.7	4148.28	5417.76	4899.4	4641.24	3877.99	4165.08	3911.62	3934.38	3835.56	3185.53	3858.59	5733.29	3781.8	3400.82	3270.42	3464.28	3463.21	4048.65	2283.75	2712.71	5483.64	7790.08	4214.47	6916.23	3113.9
ZNF800	1415.04	1610.37	1781.32	1518.19	1665.07	1312.49	2256.3	1431.42	1593.18	2206.59	909.107	1564.22	1564.67	1617.23	2397.84	1411.08	1480.32	1712.66	1541.98	1760.44	1383.93	1332.54	1205.23	1622.55	1787.53	1633.72	1663.26	1352.02	1646.72	2335.63	1368.55	1573.42	1508.42	1287.8	1347.6	1675.25	1236.23	957.506	1272.12	1434.1	1476.52	1346.09	1448.2	1311.62	1225.99	1751.51	1092.38	1379.15	1316.31
TNFRSF17	26.0352	15.9735	77.2053	31.8386	152.278	74.2602	73.3072	38.8534	84.4952	39.0496	8.8267	28.163	12.037	4.67398	57.1954	17.819	76.673	42.5657	94.0599	12.6929	24.4873	32.0583	19.987	46.5942	21.9484	327.088	10.5353	32.5204	48.9239	18.9774	134.725	55.5216	49.4309	117.151	83.6681	111.344	170.081	854.846	160.699	79.1663	82.1043	149.609	518.289	139.899	55.3841	135.927	55.1653	59.7963	252.175
SNX29	1843.28	2527.8	1977.83	2287.6	2250.16	2010.36	2671.16	2631.38	2639.09	2240.99	1946.45	2129.67	2857.11	2200.16	2694.42	2259.71	2582.59	2771.58	2595.19	2236.52	1858.19	2180.3	1738.89	2034.01	1933.71	1794.7	1882.86	2969.07	2466.92	2635.46	1962.77	1667.87	1920.74	2803.81	1867.71	3583.8	3366.1	1909.33	2286.71	1950.91	2850.74	2510.74	3525.63	2594.7	3186.6	2956.21	1893.02	3051.04	2452.52
LMO3	3424.05	3365.02	2765.72	4646.44	3919.24	3404.99	1964.19	3686.62	4199.53	2640.05	4402.78	2996.3	2067.39	3559.81	2217.84	3779.72	6787.88	4598.12	10783.6	5019.87	3146.59	4642.47	4099.39	5293.51	2914.15	4378.97	2801.17	3942.15	4460.75	3113.52	5590.32	4257.81	3344.9	3981.61	2731.19	7307.73	2101.73	3403.66	2899.6	3462.57	2878.04	5297.57	12764.2	4017.67	9403.82	2781.53	5169.53	16894.9	6432
MRPS10	1961.53	1799.19	2226.43	2006.46	1807.34	1743.59	1480.58	1827.48	1854.14	1792.6	2136.14	1874.15	1780.69	1783.88	1138.59	2071.57	2089.52	1586.58	1943.84	1963.99	2193.59	1877.07	2076.68	1821.56	1787.54	2836.84	1831.37	1894.65	1855.16	2122.07	1797.5	1856.28	1730.54	2567.38	1850.94	1684.83	2050.92	4752.43	1868.52	1778.89	1472.42	1795.92	2726.39	1899.84	2054.75	1745.07	2057.2	2497.61	1650.69
GUCA1A	0	0	1.8035	0	0.000336603	0.0216602	0.0249518	0	0.0100326	0	0.0168606	0	0	6.77932	0.0104901	0	6.40716	0	12.1773	0	0.0192065	3.16738	0	0	2.08098	1.64162	1.05709	0	0	0.030385	0	3.27553	2.74425	0.0633441	0	0	0.0669712	133.92	2.07461	0	0	3.3773	2.09098	0	0.0398175	0.0294647	14.7031	4.65075	7.37308
RSF1	4189.32	4475.76	3825.57	4015.73	4598.49	3389.23	3528.34	3600.73	4631.62	3514.51	3126.37	3879.46	4064.26	3878.03	3522.67	3071.7	2936.53	3900.01	3693.39	3464.65	3458.67	3254.44	3345.87	3413.64	2699.06	4223.7	3096.41	3750.43	3619.7	2906.97	3291.4	3621.88	4368.23	3012.24	3127.41	3893.87	3029.68	3271.38	3895.65	3870.71	3954.93	3805.26	4417.15	4761.09	2873.52	3762.94	3069.2	3067.16	3190.59
VPS13D	4895.9	7271.66	4844.99	6353	6217.48	4736.59	6825.15	5899.34	6686.49	6776.94	5784.48	5731.26	6265.64	6747.3	5969.25	5802.76	5096.17	6242.1	6775.31	4852.89	4132.88	4847.49	5072.77	5264.79	3393.4	6002.08	3748.9	6914.84	6127.41	5424.4	4643.25	4540.86	6031.97	5574.86	4597.33	7519.91	4892.79	3655.9	5483.98	6001.25	6694.47	5027.51	5379.16	5246.51	5304.4	5617.99	4439.62	5592.27	3992.39
CELF2	7462.56	8109.78	7844.08	7618.16	7549.94	5625.83	10166.7	8112.05	8598.73	10700.8	8039.05	6789.29	7414.98	7961.8	9697.37	7380.21	7112.28	9325.78	6873.48	7713.73	6146.53	7505.05	7201.42	7485.28	4635.9	4280.82	6777	8038.06	10706	9443.07	8046.1	7744.7	6432.74	7082.71	6314.33	5038.21	3098.21	3622.58	5640.56	6644.52	8250	5252.85	4595.47	6458.19	7252.88	6271.58	3929.95	2747.98	4866.25
FAM120A	6912.36	7282.31	7717.54	7599.41	8046.86	6749.18	8906.18	7434.75	7509.5	7792.77	7103.67	8388.49	8381.05	8200.23	8429.6	7361.39	8371.24	8454.65	10300	7605.56	6917.34	7444.19	8021.9	8262.5	6949.66	12081.1	7184.67	7688.96	8634.2	9856.15	7433.3	6715.03	6663.56	11566.5	7197.07	11613.5	9976.86	6865.41	7485.38	8132.56	8394.98	9927.72	9242.76	9224.21	8487.73	10627.7	13175.9	9986.88	7695.66
R3HDM1	947.716	811.409	965.593	791.889	766.416	696.783	999.245	875.31	931.821	734.89	730.344	990.025	1271.16	898.723	910.853	698.112	810.84	863.276	1132.96	788.64	886.33	811.481	739.529	866.85	563.839	993.818	905.703	849.196	752.2	951.273	785.472	815.436	1040.85	810.18	867.661	692.164	740.36	1402.98	767.398	859.921	911.505	1051.93	1304.1	942.304	904.012	825.091	1256.62	1189.66	1194.39
COL9A2	323.946	417.705	507.009	567.914	572.056	497.541	505.379	922.39	601.14	381.383	276.383	432.339	320.144	559.001	508.391	479.271	651.941	688.561	313.927	535.695	534.25	636.361	666.576	237.506	1078.54	1446.05	566.329	598.693	661.598	322.279	584.932	527.016	332.626	728.261	425.386	11666.5	2114.6	1071.72	1935.46	622.128	709.158	2283.7	1759.19	849.965	1453.92	1611.32	1550.02	27529.3	2265.95
KITLG	9184.86	7855.05	6900.92	5529.22	7128.16	7399.75	3333.58	6390.34	7230.58	5344.32	6136.49	6209.26	5869.28	7138.03	5521.25	6598.91	8569.54	4858.89	10891	6565.65	12632.8	4467.39	5594.44	7072.03	4242.27	10843.7	5215.67	6011.35	3863.47	4667.9	6714.67	6585.51	7067.06	6468.13	6121.68	3799.77	4461.89	3932.87	5160.56	8025.55	5802.98	7986.41	3392.96	7568.03	4487.87	5299.85	4429.83	7098.86	7041.67
ERCC8	390.067	366.954	480.119	493.894	375.694	399.597	371.298	372.542	433.157	223.234	361.885	434.29	426.74	392.336	384.468	406.985	395.557	377.295	373.227	356.836	504.227	453.778	334.787	337.043	345.61	376.747	418.178	367.164	336.215	315.165	324.02	364.32	310.78	305.605	314.874	462.733	302.314	543.494	389.363	439.25	359.424	288.099	570.148	286.485	339.712	340.831	353.538	428.331	413.828
ADAMTS6	135.913	151.418	174.109	214.637	176.325	123.838	224.529	182.679	86.6528	157.217	66.9361	143.79	117.093	130.757	130.28	132.69	120.546	294.852	67.4976	145.634	91.1145	192.172	92.9406	113.825	83.5465	130.741	126.091	168.224	137.748	99.1956	137.407	83.5242	101.754	28.193	68.6125	66.2249	103.937	270.369	124.638	151.781	123.301	87.6916	70.5068	547.484	45.4202	92.7739	214.707	42.5657	175.535
H6PD	5780.3	9908.11	6933.21	8925.5	8877.39	6294.44	9576.54	11123.2	8569.15	8305.35	10248.6	10011	8938.62	9514.46	11336.9	10139	9356.28	8523.33	6903.13	9032.15	7956.93	8379.52	7001.54	7980.11	5251.93	7036.72	6609.95	9737.38	10967	6584.6	8605.96	5914.59	6537.28	9763.59	7115.03	13913.7	7593.03	3683.5	7486.4	7243.96	9995.75	9562.21	6857.43	6460.09	8655.88	9092.96	6729.36	6853.14	7825.93
VAMP3	10828.9	9349.63	9443.23	9201.02	8601.88	10629.1	7916.12	8410.44	8942.09	7370.43	10523.9	9279.41	8629.77	9201.04	7985.84	9312.15	8943.2	8444.21	7153.65	9221.22	11443.3	8966.77	10701.2	8844.28	7492.6	5406.22	11704.8	9540.22	7842.09	8999.34	9838.97	9020.37	7466.37	8350.59	8870.57	8078.63	5755.92	3524.54	7536.88	8141.03	8611.03	4712.65	4961.41	5423.53	6595.67	5328.98	5633.64	4764.4	5595.07
PER3	1837.7	3713.4	4412.59	2669.98	1311.42	1744.72	1013.07	3034.71	2020	632.538	2559.4	1932.44	509.513	2807.11	722.357	974.385	748.421	1372.7	1836.47	2865.98	2206.92	4009.25	3345.87	2086.02	859.331	1947.56	1762.03	2503.32	1491.72	1778.65	2625.72	702.995	477.878	1689.34	945.529	3610.7	2846.56	847.091	1569.8	2029.36	1757	3309.92	2090.92	428.298	2737.36	2916.27	1335.42	1700.67	1526
UTS2	184.354	196.001	6.22719	84.3228	100.185	84.4635	155.828	82.2532	52.8522	103.243	144.744	101.036	133.872	161.121	348.351	4.94608	150.104	204.368	246.412	51.0266	192.103	117.459	69.9552	9.80382	193.143	219.962	0.0226656	143.799	56.1446	175.805	95.6124	191.933	68.4237	107.785	200.984	549.189	13.0851	157.033	110.229	99.4094	151.455	148.754	97.463	218.916	267.758	298.734	187.72	180.323	513.688
TNFRSF9	80.0299	54.2732	255.795	93.6893	56.1046	60.8491	285.256	97.6201	68.7001	361.011	48.3031	97.1448	141.431	135.517	1032.32	114.864	124.94	60.7872	140.092	340.807	68.9181	106.798	65.9577	183.769	216.125	169.978	257.401	65.0654	52.5135	536.62	61.2412	107.544	55.4093	135.896	119.679	521.295	171.296	870.944	37.0985	172.754	79.6796	390.472	951.609	197.957	213.6	404.46	479.554	187.251	715.929
EPN3	49.3139	12.4078	9.81364	75.9004	30.0565	22.5813	39.0296	29.7905	20.1047	17.6356	26.3697	21.3586	60.7832	30.9965	23.3332	53.4691	85.4707	15.5747	42.9563	16.9499	36.7056	85.4218	70.9547	16.0773	352.761	1166.67	2.12676	69.6164	28.952	23.7033	52.8968	31.8594	94.3451	561.925	55.1861	330.236	1214.67	847.145	572.705	146.614	51.4722	357.777	183.506	144.652	397.246	304.171	425.073	618.915	83.0927
LTBP1	4545.87	3148.58	4637.71	4037.27	3922.24	4242.43	8241.41	4382.91	3381.82	2482.83	3961.96	4441.99	7339.85	4085.35	4598.73	2773.64	2614.4	5732.68	2491.92	4486.69	4238.37	4907.26	4286.27	4305.6	2983.06	5401.42	3514.59	3234.91	2784.99	2674.49	4760.26	3612.73	5638.43	4513.1	5153.45	5880.16	6772.44	5386.3	3765.87	4432.16	5095.32	3448.24	2538.77	8946.3	3944.6	5667.62	4006.35	5067.53	6232.47
RCN1	4579.38	5139.3	6626.35	4673.6	5065.35	5998.36	5275.88	3932.57	4515.43	5080.14	4230.64	5705.03	5825.21	4738.46	5103.94	4619.44	4557.08	3570.47	7508.46	5283.01	5956.58	4579.49	5580.45	5250.45	5589.16	5089.17	5279.75	4581.53	3267.13	6590.43	5099.14	5884.7	6124.83	5282.25	4423.07	6150.88	4803.12	8406.42	4970	4334.34	4654.42	4368.59	15949.8	3943.43	5218.14	4428.42	7220.3	10880.2	6686.94
ELN	14963.3	10812.1	8658.88	9183.2	9289.15	12183.6	17854.7	13853.2	8685.38	13523.2	17959.8	9990.59	43857	9868.47	14618.1	10257.8	8424.96	18373.4	8487.04	12371.6	14160.1	19374.9	10958	11677.9	10233.4	9286.67	9715.81	5459.65	9010.28	4672.66	13512	15006.7	26660.7	7236.16	20204.5	13190.8	14766.9	9658.04	8611.22	14841.2	11292.5	7819.48	2393.64	34361.3	15435.2	13285.2	14753.6	14205.7	12525.9
RFC2	996.119	843.464	1056.22	922.154	866.601	1015.31	819.377	915.088	892.74	1042.82	1205.14	954.073	962.216	957.718	1027.36	997.164	1239.24	1114.54	848.708	1198.34	1205.08	973.774	1023.35	998.626	1257.11	802.52	1190.44	957.718	1072.14	1192.03	1131.8	1057.56	707.143	1329.95	1035.16	1251.86	814.759	1381.07	874.525	777.27	899.385	1009.75	1341.43	834.737	1192.8	959.911	970.44	1503.16	1137.1
ARID1B	4420.19	4718.01	4057.09	4251.88	5155.52	3828.22	4999.69	4544.77	4699.24	5175.97	4005.83	4247.68	5540.76	4732.9	5242.68	4051.04	3951.15	4887.62	4460.3	4236.28	3604.18	3876.92	3795.58	4209.68	3146.98	4098.62	3269.78	4586.97	4584.91	3851.15	4398.14	3749.54	5721.2	4912.25	4426.47	4342.2	4356.77	3879.58	4598.14	4305.72	5100.21	4240.47	5240.25	5521.59	3748.74	5094.91	4025.08	3736.64	3736.51
CLPTM1L	6018.64	6698.02	6831.82	7560.06	6704.38	7718.31	7203.34	6204.96	6701.29	7133.22	10023.8	6586.23	5957.51	7071.02	6331.48	7854.53	9156.85	7146.24	7973.72	7253.82	7009.52	8263.13	8390.66	8160.31	7180.4	9515.6	7639.62	6939.24	7133.38	8151.91	7574.43	6761.19	4914.28	9032.01	6138.37	18656.2	7425.45	10235.8	5991.81	7157.9	6484.77	12078.9	16609.2	22723.1	13385	15949.1	11383.6	12786.5	12524.1
NEDD4L	11474.1	13221.5	9008.88	11370.5	12236.6	8797.79	11347	9038.89	15449	13520.4	17139.5	8109.64	4929.02	10397.2	12494.5	10177.6	9543.66	11327.1	8278.44	11287.4	9236.44	9496.37	11235.9	11363.3	9548.46	7509.91	8678.77	10370.4	13069.6	10547.8	12253.9	10451.4	8153.07	8303.74	8062.34	8895.62	6822.04	5005.57	9567.09	8280.17	9163.17	8571.32	6136.96	11109.8	8775.37	7081.54	3126.85	6265.21	4063.5
FOXP3	41.8709	32.9098	87.9781	66.5386	40.0746	25.9498	186.489	96.8001	47.5561	22.2904	37.3199	51.4872	52.4406	22.2246	167.242	19.7995	61.3665	29.4994	71.5756	24.6254	57.7686	66.199	76.9511	44.7923	12.5541	103.902	52.5444	62.3965	42.5661	99.0489	43.6164	75.6842	61.0065	233.019	138.955	356.171	164.196	533.995	65.9404	114.58	172.396	361.265	381.482	170.357	226.859	418.447	277.952	137.87	907.255
PPP1R3F	603.273	521.057	527.667	459.201	551.017	576.299	442.35	479.247	434.224	457.679	618.454	433.313	384.841	525.526	437.429	432.73	449.254	503.363	355.848	419.855	379.88	455.927	392.75	515.453	709.983	367.726	382.466	409.662	468.542	468.572	484.655	502.902	489.261	298.596	557.814	897.652	676.495	417.835	571.677	459.468	381.977	420.577	390.826	577.765	408.312	509.066	818.61	645.326	667.88
HEXB	6731.74	11099.8	13381.9	15282.3	6066.2	10443.4	15229.4	11943.4	9973.23	9178.85	3438.93	13709.7	11082.2	9276.76	10597.6	9705.27	17291.4	17730.1	9857.23	9363.43	11203.5	8655.01	14968.5	10235.6	9317.72	15077.2	21487.8	12968.7	12223.1	24810.8	12406.2	8423.4	7078.84	18834.1	11424.3	14027	9719.48	10689.8	4493.09	7532.26	14203.7	6467.34	7582.05	9572.58	8281.94	8670.22	8947.54	10817.1	10585.1
PTCD2	411.478	477.42	454.08	466.707	459.849	387.226	287.676	468.407	475.415	341.389	393.684	541.167	308.763	378.762	291.279	390.151	390.085	387.723	476.5	377.275	433.169	454.851	516.671	439.254	288.191	510.006	362.5	482.942	374.282	225.503	417.805	290.532	555.907	396.91	328.264	888.052	550.201	374.049	512.966	585.127	462.601	520.378	561.862	428.315	464.731	430.344	492.554	428.35	508.976
KIAA2022	40.9331	71.2421	39.4406	60.9006	112.207	47.3216	47.037	83.1924	99.2979	34.3867	24.1763	60.2301	63.8474	94.1289	38.1549	47.5276	76.7058	71.2724	123.715	77.4956	33.3734	55.5413	65.9579	60.9337	123.183	420.179	19.9912	94.0683	79.7507	4.81733	76.1293	33.6809	81.302	57.4554	33.4094	47.9792	181.83	26.6232	152.452	85.0826	72.4418	860.761	215.617	23.7683	214.638	408.653	55.1711	141.275	107.126
JKAMP	1923.34	2368.35	2748.71	2639.04	2380.4	2685.7	2003.12	2123.17	2700.37	1847.48	1570.34	2574.65	2568.02	2281.5	2172.28	2200.3	2608.89	2321.21	2432.61	2331.06	3047.69	2187.78	2653.31	2299.36	3114.59	2624.28	2883.11	2354.98	2262.08	2268.44	2092.75	2353.61	2250.25	1677.67	2127.36	2217.66	2650.65	2206.3	1813.93	2299.97	2170.45	2269.03	3094.39	2180.64	2053.63	2312.35	2316.53	3226.73	2662.22
DKK3	12388.3	12030.6	11693	9223.51	7858.51	13094.2	11231.3	10806.7	9233.68	6504.35	13861.9	9839.03	14467.3	9122.08	8844.79	9713.19	7954.89	8070.36	5521.69	10497.9	11678.8	9894.62	11229.9	10366.4	6840.03	4972.24	8772.28	8052.51	4372.79	8569.75	8830.64	9660.06	14716.1	8225.31	12402.7	6476.34	7167.98	5534.78	6412.06	8021.33	8968.12	3111.92	3852.2	7780.29	5459.33	5477.81	4970.37	8771.92	7940.48
ARHGEF5	1107.83	827.418	1026.59	1468.53	1103.04	891.522	1721.15	865.339	1012.13	1501.45	1262.17	982.244	860.999	1228.86	1460.53	997.162	1463.86	1522.29	1194.32	1553.5	838.602	1147.82	1025.35	1250.53	1305.15	1606.8	1278.7	963.131	2846.76	1734.9	935.875	1022.58	1026.48	1637.8	1035.17	1297.95	1206.7	900.398	788.001	1218.26	1250.03	1318.58	720.486	1350.65	817.722	1302.86	871.278	1550.22	1087.22
NFE2L3	975.637	1149.89	1365.85	1237.99	885.636	1105.35	1113.84	1042.6	1056.49	857.684	569.167	1060.95	919.611	763.108	1102.55	680.287	1021.21	880.65	678.97	935.984	1101.8	1156.34	1271.19	1030	850.965	1507.13	1101.13	1046.35	812.011	779.007	868.102	1214.58	1180.23	1081.8	989.077	2767.77	889.15	2199.64	720.021	1405.4	1322.53	1297.9	3027	2898.35	765.732	1065.61	2970.93	1441.18	3800.32
MCUR1	3267.68	2283.73	2347.56	2544.38	2823.21	2531.5	1723.53	2163.86	2873.63	2544.26	3557.28	2516.35	1819.45	2597.31	1773	2381.51	2767.76	2375.11	2382.51	2595.94	2313.56	2226.22	1948.76	2635.54	2126.88	3260.98	2186.51	2427.33	1887.77	1934.46	2603.42	2423.85	2431.7	2751.17	2374.43	2474.94	1771.11	3008.68	2311.44	2563.01	2084.99	3518.84	2209.11	3503.7	3671.25	3578.51	1367.89	4164.89	1869.62
LIMA1	4925.7	5693.33	6338.28	5152.49	4804.87	5229.59	4997.43	5299.82	5851.87	4485.69	4228.44	5825.5	4428.57	4864.45	4709.95	5109.6	5137.8	5367.5	4701.62	5812.77	4399.43	5358.92	5452.53	5543.59	5069.2	9188.77	4724.99	5296	5183.05	5817.4	4549.48	5794.14	5113.06	5813.68	4104.82	4863.49	5601.19	4045.2	4735.14	5312.41	5171.12	5634.78	2518.03	3608.39	4031.99	4565.37	3329.27	4210.89	3803.02
LETMD1	2395.36	2194.67	1820.78	1997.08	2280.21	2277.11	1467.99	2510.21	2588.38	1658.63	2680.03	1955.76	1557.02	1852.45	1510.34	2135.93	2403.99	2763.76	2021.55	2036.37	1562.76	2374.62	2746.25	1863.68	1921.18	2287.56	2135.02	2411.06	2216.78	1331.38	2445.59	2035.63	2077.48	1888.38	2361.06	2523.91	2174.86	2532.77	2345.43	2180.25	2141.44	2678.48	1533.22	2557.58	2550.41	1745.06	5870.49	1417.08	2307.5
SLC4A8	262.5	407.023	501.634	648.527	479.886	505.406	281.959	525.369	745.856	436.279	140.416	608.203	304.176	430.588	471.319	579.287	616.872	960.767	195.316	395.147	349.899	287.246	480.694	352.269	980.387	711.909	574.728	685.541	661.612	432.001	411.295	412.469	373.223	571.279	305.651	587.543	1916.84	890.937	1030.02	503.334	365.863	761.298	706.978	416.895	308.741	533.861	4012.16	280.246	879.461
LAMC3	4514.23	5171.4	4008.64	2791.78	3405.29	3506.29	4011.91	2652.14	2906.41	2680.05	7668.31	3964.95	9789.41	3615.64	5219.37	3534.14	2187.08	3454	3211.78	3981.64	4536.01	2422.7	2275.55	4382.71	1192.41	1040.29	5198.84	2136.99	2891.94	3310.61	3321.11	3403.8	9239.7	4041.09	6458.78	669.118	1211.46	1322.05	3098.38	4246.05	4780.5	92.8202	532.857	750.02	2243.91	865.009	2296.25	2017.59	1771.72
PTGER3	208.52	405.323	141.746	191.164	271.501	273.522	137.573	187.153	387.705	381.436	116.283	307.018	323.331	261.559	209.72	276.275	98.6628	189.488	159.523	311.74	145.543	944.738	194.876	91.3828	303.833	79.9941	298.393	97.6233	320.843	120.468	129.954	424.717	136.654	51.6043	204.378	105.588	299.781	99.921	415.07	181.263	172.464	61.8566	45.633	139.908	175.935	207.067	124.306	32.2375	162.569
TNIP3	121.921	104.154	164.18	239.899	94.1749	356.8	173.092	122.027	88.7756	1581.79	55.9811	169.041	143.658	87.6091	425.748	195.073	478.772	145.126	240.3	484.697	177.751	114.281	170.891	370.25	540.818	272.949	563.13	116.616	81.5138	1023.97	69.5945	323.512	91.7046	326.6	84.5051	112.303	53.2345	194.156	99.9304	515.274	131.286	48.0875	141	139.899	126.187	180.138	199.904	29.9403	96.9529
MAPK9	2892.49	2762.04	2848.31	2918.31	2789.15	2846.67	2531.38	2282.31	2649.67	2681.93	3016.69	2375.47	2520.07	2763.17	2271.84	2669.67	2882.82	2796.77	2678.02	3048.2	2506.82	2734.45	2584.36	2820.2	2463.08	2599.74	2990.28	2700.45	2724.29	2385.3	2843.89	2664.2	2462.21	2548.66	2443.94	2856.07	2406.3	2510.87	2413.42	2499.77	2522.65	2443.62	2670.41	3415.18	2738.53	3291.64	2828.6	2248.44	2044.21
COL23A1	220.651	173.679	152.539	133.06	192.355	204.848	134.111	135.615	154.256	135.801	448.348	157.389	115.542	417.352	248.874	127.737	109.605	160.818	146.227	238.516	163.282	198.592	118.924	120.987	204.642	82.4607	113.493	65.9702	107.814	153.46	135.539	96.4854	182.924	168.575	105.481	128.636	270.253	52.3243	249.255	166.095	144.248	117.804	40.4496	80.8852	161.545	172.558	99.9133	94.2163	364.058
BCAR1	4804.67	6412.12	5675.09	5304.31	4297.94	6100.8	5841.97	5061.99	4888.37	8912.84	6613.48	4946.23	7390.71	5714.56	7472.14	5275.96	5090.69	4716.32	5047.23	4948.28	6135.4	4414	5330.61	6505.48	6846.28	4331.52	5701.09	5082.56	3660.46	9345.04	5364.67	5088.05	6846.34	7040.5	4836.89	5582.56	8196.22	4237.47	4127.41	6253.37	4947.88	3501.59	5324.22	5165.61	4536.52	3202.14	6776.61	6400.64	6170.61
FAM160A2	2139.34	2579.46	2038.85	1916.48	2608.82	2199.45	2414.48	2172.01	2184.82	2603.8	2218.39	1985.87	2021.06	2303.04	2728.31	2264.66	1950.38	2378.6	1851.81	2460.53	1961.48	2481.39	2056.69	2257.23	2253.21	2773.87	2147.63	1801.49	2517.67	2177.56	2246.89	1697.44	2048.47	1421.28	2330.94	1702.12	2905.61	1641.87	2230.06	2340.48	2508.23	2441.96	3294.44	2646.11	2215.14	1901.43	2322.26	1934.92	2180.95
HERPUD1	6645.18	7754.4	7739.1	5757.89	10511.4	7041.82	9593.7	6517.84	6642.13	4102.42	7344.91	5185.23	5409.82	5171.45	6069.87	8119.91	5814.96	8090.4	6767.13	5709.69	6456.4	9388.5	8138.82	5824.16	4961.66	9492.73	6254.81	6898.55	8515.49	4134.45	6887.37	5450.48	6079.95	7270.09	7156.87	7915.41	11488.1	12431.6	10725.9	7587.07	8159.63	6758.93	12596.3	6892.21	6529.3	5606.16	5054.06	8910.92	9175.5
HOMER3	1321.06	652.847	784.299	728.157	634.172	1131.22	677.287	1349.18	477.556	605.575	1264.33	863.718	1733.76	574.892	633.378	750.594	688.133	687.638	1603.32	451.327	2287.84	878.745	866.449	656.164	695.394	576.114	874.185	822.964	325.308	769.553	877.394	833.932	1476.18	849.967	3130.28	843.855	824.167	964.18	731.345	879.327	840.585	716.45	945.428	697.678	949.365	759.299	1010.32	1388.27	1120.5
RAD51	67.9431	50.727	98.7189	84.3387	56.1042	75.4379	74.5125	80.4663	72.9087	52.9988	59.2465	87.4392	98.1389	47.7637	120.723	75.256	115.027	52.1128	187.099	71.5103	190.911	73.6861	79.949	94.1275	51.1788	126.745	91.4115	65.994	57.9713	121.509	65.9023	99.7773	45.1981	167.453	86.1864	117.107	102.803	517.854	81.3894	73.2668	86.9477	101.431	102.645	142.759	148.301	135.921	201.559	133.259	165.33
POLQ	37.2106	21.3187	39.4461	71.2242	37.0692	31.5741	112.214	67.8149	57.0604	26.0124	21.9824	44.6827	76.0835	39.7964	83.6608	46.538	52.6166	41.6832	131.886	22.0658	96.5891	93.938	25.9831	73.5117	268.195	145.683	27.3429	56.0526	62.5234	100.245	34.3225	37.3151	45.148	80.8601	47.6499	107.508	195.993	597.855	119.496	76.6454	67.6014	116.069	220.801	115.155	131.701	183.352	553.117	184.885	208.771
PIK3CB	1813.5	1925.67	2268.6	2025.19	2401.43	1588.27	2273.53	2009.24	1807.66	1724.68	1541.82	2213.22	1835.45	2019.94	2276.07	2072.56	2456.58	2748.99	2161.64	2112.18	1657.16	2133.32	2029.71	1961.4	1754.13	3108.18	2799.04	2146.07	2205	2279.04	1933.06	1832.32	1536.07	2535.74	1800.7	2709.2	1840.75	2049.24	2018.9	2303.35	2067.28	2195.05	2050.5	2042.62	1739.4	2546.38	1889.77	3346.14	1959.23
CYBA	18405	19676.3	27944.7	24781.3	22959.4	24485.4	25566.9	24866	17693	20743.8	19764.8	26149.7	16457	17699.5	23744.6	24722.2	35676.3	30189	20398.5	19430.4	21978.2	22537.6	25309.9	22485.4	26087.3	22017.4	46416.6	25119.8	27445.1	49332.7	25921	26626.4	11310.7	40939.2	27357.1	25054.8	37019.3	30586.5	20103.5	17985.1	31034.9	16906	29323.6	8911.04	34956.6	20703.2	11513.6	11214.5	15222.3
THOC3	1275.42	1041.22	1196.23	882.792	785.451	1285.43	829.689	1001.9	1166.36	609.292	1172.24	862.743	819.183	1152.33	803.893	1395.24	1127.49	920.645	1503.12	855.915	968.527	1047.44	1334.15	866.838	746.557	907.147	969.799	1002.94	1083.92	968.998	677.756	972.569	1088.81	960.041	1400.36	1440.03	1586.87	1618.08	793.152	1089.24	862.307	1455.33	2125.12	1549.58	1920.82	1560.62	1505.33	2908.57	1375.43
HEBP2	3551.62	2662.28	2536.91	2319.46	2735.05	2902.95	2209.39	2209.97	2816.59	2585.18	2483.77	2340.49	2430.3	2566.99	2631.94	2926.14	2517.96	2991.52	2577.81	2578.05	2742.28	1944.35	3027.07	2423.96	3823.54	2061.13	2753.88	2393.86	2522.19	2719.28	2984.1	3142.89	2369.31	3787.22	3260.58	2103.4	4363.82	2543.23	2982	2362.33	2192.17	2427.26	2233.99	3136.28	2584.74	2630.53	1815.77	1775.36	2217.87
MPHOSPH9	500.843	566.472	601.247	610.089	542.001	518.926	536.316	644.735	593.747	422.317	278.577	709.246	781.267	566.973	648.185	498.085	486.516	605.949	852.785	476.912	694.164	616.079	540.656	589.852	659.88	623.581	456.015	567.937	568.234	507.535	359.29	508.573	751.909	410.988	608.027	654.731	649.415	1970.33	577.866	647.475	630.23	802.508	835.537	530.156	566.541	763.595	825.832	869.263	953.312
PLEKHA5	2346.04	1980.02	1432.21	1275.46	2205.07	1537.6	1683.39	1503.76	1965.06	1373.98	1756.73	1639.03	1826.36	1573.35	1416.07	1614.08	1370.76	1904.8	1163.65	1797.91	1476.12	1459.6	1499.05	1826.05	2383.71	2753.5	915.179	1909.13	1657.59	1042.22	1860.65	1632.59	2296.54	1639.01	1802.4	1935.41	2873.73	1058.4	2582.33	1547.9	1563.54	860.071	1680.41	2758.43	1344.39	1230.62	1542.7	2900.58	2144.93
PRSS8	6743.87	6687.35	4863.83	6302.39	7761.33	6191.98	4937.85	4538.42	6308.27	4749.88	14709.4	3289.71	2933.79	5413.9	4343.5	6648.42	6807.65	5079.72	3954.15	4860.55	4943.67	6656.2	6529.84	6592.43	3636.68	13868.6	6056.22	6282.67	7272.06	4225.32	6561.48	5823.82	3873.4	8653.85	6010.24	11875.5	8065.35	3069.57	5584.94	9401.45	5159.76	15529.9	8845.72	11224	13128.2	13471.7	9518.15	15424.1	17917.8
SIKE1	1802.33	1912.32	1871.95	1699.06	1515.8	1758.21	1581.41	1839.25	2077.04	1488.4	1858.71	1943.13	2149.68	1880.4	1500.8	1773.51	1269.96	1723.95	1942.81	1524.49	1930.36	1798.05	1763.88	1862.8	1262.35	2039.94	1641.2	1746.34	1508.04	1412.79	1471.61	1649.24	2373.48	1389.68	1754.64	3483	1618.78	1834.14	1579.07	2035.24	1885.14	1537.89	2312.76	2902.15	1911.99	1692.21	1901.98	2924.71	2401.73
RRP12	877.864	952.109	1135.16	1067.4	1000.85	731.708	2231.09	1008.2	782.882	3092.23	1179.95	1304.8	2373.37	1492.8	4864.46	1015.98	1459.5	1063.2	1362.02	2332.82	995.214	1193.74	1024.35	1589.38	2456.79	1649.25	1836.62	993.867	1354.88	5410.98	1411.26	2101.95	1173.15	1914.08	1308.22	1411.23	1611.66	2075.91	1168.09	1090.08	1102.51	1165.45	1426.43	1130.76	2011.54	1513.17	2298.73	2781.12	1525.08
FNIP2	5889.24	6992.87	4740.89	5283.69	6571.13	5488.48	9927.11	5845.99	6813.26	6932.3	3455.37	4238.93	5420.5	6508.05	6286.98	5941.4	5774.4	5418.79	6096.35	6573.34	4519.39	5620.52	4647.04	4517.14	3441.43	7572.93	5352.26	5593.53	5687.85	6348.5	5269.04	5261.81	3659.99	5551.46	4455.76	5298.39	2696.78	2149.17	4405.53	6252.49	5833.64	8091.39	5129.34	10261.8	4228.95	6471.09	6753.8	5624.44	4935.53
MSMO1	3624.2	4722.46	3833.62	4772.94	4943.13	5487.34	5582.97	2589.74	4735.17	5655.98	3347.9	4495.42	2675.17	4791.9	5100.76	4488.72	4997.54	5608.33	4896.92	5599.86	4219.5	3867.32	5291.63	5561.53	7426.79	4524.42	6317.83	4807.63	5274.59	11070.4	4050.89	3995.46	2330.25	6840.28	3114	3359.13	3497.23	1623.77	2702.86	3678.45	4413.52	2317.16	2274.42	2680.35	2384.48	2541.01	4372.2	3240.57	1512.12
TTC17	3289.99	4344.82	3560.83	3938.87	4111.59	3755.05	4179.22	4148.71	5390.17	3859.64	3221.78	4117.49	4108.37	3921.87	4671.81	3484.63	3009.94	3761.76	3818.14	4149.42	3670.82	4158.79	3800.58	3591.13	3240.95	4962.54	3048.08	4140.21	3799.15	3455.77	4124.25	3819.71	4523.58	2759.39	3077.98	4113.72	3089.91	4744.8	3543.37	3978.61	4178.17	4134.69	7695	5033.31	3224.27	4458.58	3863.35	5139.81	3706.96
ALX4	0	43.443	1.75206	3.73279	0.000622158	2.29832	6.85797	0.861985	4.23711	0	0.0318977	3.87953	2.96375	0	4.24814	0	0.0316154	8.74464	1.03232	0	2.26318	16.9716	9.994	0	21.8178	8.23088	0.0168906	1.76904	0	9.35793	1.82753	2.15761	13.9986	4.76649	0	26.9043	228.62	85.888	55.548	28.7766	1.51183	13.7413	8.30737	1.8788	6.68582	5.43005	3.15356	29.7433	8.28398
FSTL4	309.096	357.219	262.044	195.854	241.446	353.385	66.5445	220.628	249.33	348.877	275.231	110.745	21.9247	161.821	174.772	342.625	430.539	140.789	159.522	304.939	263.224	285.072	200.872	332.617	105.477	46.4802	194.389	200.754	265.549	219.544	248.83	242.21	91.6877	126.525	127.223	566.437	75.6675	493.054	92.7213	202.282	138.528	53.2482	550.443	217	1519.9	342.976	568.262	221.679	406.451
FOXN3	7060.4	7078.37	6475.56	6411.1	7143.19	6248.26	7303.01	6063.91	6054.72	8695.15	4930.26	5931.4	7074.24	6862.12	7107.81	6307.78	5644.02	7990.44	3974.6	6091.26	5169.13	5335.44	6005.18	5512.2	5256.1	4222.81	5501.46	5996.88	6171.81	6522.01	4151.15	5215.64	5899.9	5148.73	6233.13	5600.8	4440.6	5793.69	6755.06	6196.86	6322.91	4144.99	5362.58	7788.88	4160.34	5220.02	3520.29	5431.51	4906.9
METTL24	53.0545	52.5341	83.4904	35.5886	71.1311	46.1803	88.1784	61.4868	71.8334	56.7392	48.2702	115.641	92.9169	67.7983	43.4407	56.4423	47.1375	41.6908	43.9751	66.4392	48.8927	71.5289	83.9468	38.5119	45.952	24.4292	75.6403	34.3291	46.198	34.2968	77.0784	29.9472	36.4569	37.5159	71.2271	34.5469	66.096	27.5816	65.9195	56.483	97.6578	18.8506	7.27697	52.3461	31.0232	73.3195	36.5158	47.1072	34.1511
AKR7A2	2533.14	2015.63	2086.42	2071.11	2078.84	2561.88	2031.76	1922.42	1777.02	1665.14	3194.31	1962.56	2099.42	1980.05	1654.38	2483.5	2698.73	2053.44	2154.48	1861.76	2101.42	2048.98	2369.49	1957.81	3114.59	2362.75	2351.46	2072.81	2120.7	2112.65	3051.89	2031.96	2073.14	3269.76	2765.59	2805.19	3841.94	2615.57	2360.88	1729.15	2170.43	1940.42	3242.63	1740.88	3108.07	2080.48	1666.21	3247.43	2651.12
MRTO4	1310.78	926.284	1256.33	1301.7	959.773	1280.96	1915.96	1257.8	988.888	2004.73	1781.93	1304.81	1446.02	1291.05	1439.36	1220.96	1845.16	1122.33	1505.17	1136.97	1558.29	1341.07	1361.13	1367.06	1992.16	1532.39	1649.59	1157.57	1378.45	2188.09	1316.56	1475.39	1380.65	1870.81	1735.38	2278.14	1462.94	2614.64	1157.79	1173.54	1268.52	1694.44	2676.62	1685.68	2089.02	1587.6	1328.08	2837.45	1832.68
NNAT	60.5009	67.6845	67.2959	67.4704	71.1314	45.0669	109.936	58.7586	31.7207	56.7312	43.8972	60.2322	73.0222	62.9717	64.6136	77.2386	71.2243	57.3522	57.2665	34.0015	62.2141	56.6038	41.9731	93.2574	84.5672	72.7354	91.3985	60.5772	67.0573	121.443	73.3486	50.1583	95.6803	86.6196	68.6571	42.225	209.84	129.477	92.7001	63.2018	87.868	67.9305	79.8222	122.812	76.3517	59.3372	116.319	36.8125	76.6668
USE1	1232.6	919.182	1027.51	781.574	911.684	1255.03	928.225	991.958	828.296	966.532	1530.79	853.028	887.66	940.973	961.695	1070.44	925.889	705.02	933.577	998.167	1163.99	984.449	985.373	1014.77	1261.29	715.062	1148.41	877.224	896.303	919.433	1138.3	1105.57	760.833	970.543	1192.68	1067.55	1068.55	808.075	920.871	896.182	921.989	943.543	1350.75	889	946.053	889.796	590.841	1056.47	884
MCF2L2	48.3874	60.5461	105.033	87.1641	47.0876	42.8208	81.3529	78.6722	72.9002	56.7293	43.8989	81.6131	58.5196	51.7759	98.4823	64.3637	69.0389	86.9542	95.0903	108.226	31.152	55.5387	65.9579	73.504	74.1338	80.9199	72.5008	74.1554	98.8122	62.5835	63.124	64.8312	46.6101	45.7183	54.3973	51.8296	59.0742	87.5727	58.7195	60.6719	90.2996	40.3696	79.821	39.9572	59.7718	79.8084	125.294	104.445	98.8608
NRIP2	217.838	260.092	200.102	239.913	228.422	190.252	205.142	319.234	265.172	150.679	275.228	276.9	215.246	250.41	136.65	249.539	219.15	259.084	178.949	214.611	148.869	215.687	179.885	232.175	99.2124	257.456	129.256	287.61	234.727	113.383	302.699	231.13	212.003	210.722	253.817	194.883	308.067	167.511	290.461	266.468	245.859	252.052	137.885	200.836	276.58	193.059	182.052	213.581	257.743
LAMA3	8129.12	14725	8514.42	12977.8	12686.4	9332.44	11129.3	10595.1	15740.5	12530.6	11933	9464.01	10097.1	12091.1	11125.1	10210.3	9395.74	8901.49	4342.71	8576.47	8299.03	8738.28	8116.83	15624.1	5688.37	5648.13	7492.53	10838	9632.92	8457.63	7779.61	8811.54	12587.9	5450.74	7654.54	3457.05	5289.47	5590.01	8248.61	10363.7	9632.43	2853.9	14930.7	3675.02	3476.54	3685.31	5783.3	1219.59	6085.63
AP5M1	2031.34	2575.9	2428.33	2788.99	2175.02	2332.27	1912.59	2093.33	2903.21	2363.78	1786.36	2464.86	2176.25	2538.31	1652.26	2399.33	2368.93	2413.38	2352.85	2377.91	2514.58	2090.62	2342.51	2345.98	1890.91	2433.03	2651.96	2391.16	2290.18	1947.43	1838.35	2135.48	2177.66	2176.35	1846.77	1796.2	1922.21	2275.78	1695.47	2330.33	2496.1	1930.98	3155.55	2186.36	1793.61	2094.49	1765.4	2335.68	2286.25
ANAPC4	1396.43	1490.12	1494.14	1740.3	1512.79	1436.3	1446.19	1731.64	1796.02	1501.43	978.188	1696.35	1432.3	1429.81	1383.23	1467.52	1374.04	1622.24	1687.18	1757.89	1630.49	1859.97	1557.01	1623.45	2037.07	1820.9	1534.02	1451.5	1633.13	1403.34	1593.24	1469.92	1953.98	912.042	1392.83	1539.88	2053.18	1946.47	1582.16	1701.39	1679.65	2211.47	2305.49	1761.85	1129.73	1720.23	1584.19	6920.31	1650.72
KCNQ1	2368.34	2686.31	2461.51	4182.55	3754.93	2799.42	2651.72	3226.36	2942.32	3014.03	3253.57	3330.52	2742.16	3238.45	3532.19	3135.08	4848.49	3472.27	4024.69	3050.73	2952.21	3549.12	3698.65	3168.91	2770.05	3414.58	4169.16	3845.4	3921.51	3910.12	4050.91	2736.42	2230.02	5743.27	3209.53	891.844	3666	837.569	2697.7	2291.53	3142.5	3643.58	3702.9	1819.89	4476.71	2753.46	1868.62	1941.84	1609.13
TRAPPC3	2971.62	2534.01	3234.19	3008.28	2840.24	3464.62	2662.02	2746.2	2791.24	2943.33	3172.41	2791.3	2555.8	2832.54	2323.74	3032.09	3497.5	2934.99	3093.17	2936.61	3382.02	3082.53	3294.9	2748.47	3564.61	2710.88	4141.83	2913.88	2758.73	3140.62	2826.25	2889.77	2412.89	3138.68	3090.54	5745.78	2605.85	2734.54	2524.66	2683.56	2853.09	3134.32	8725.42	3734.04	3526.33	3109.38	3118.77	4185.6	3963.77
THRAP3	8441.93	7425.71	7365.76	8866.46	8431.57	7474.06	7452.02	7534.22	8795.24	8258.84	9546.84	8428.32	8238.79	8287.15	7867.21	7936.72	9216.02	8275.56	9062.72	8889.92	7479.34	7161.25	7368.31	8273.25	6888.05	8880.54	8303.66	8973.18	7385.32	8118.88	8492.69	8437.98	8231.37	8893.79	8533.87	8806.33	7365.17	6918.73	8284.69	7594.69	7976.72	8216.06	11750.4	8611.24	6873.39	7901.22	7596.65	9016.53	7790.82
PHPT1	4255.42	3135.23	4115.44	3472.17	3037.61	4096.08	3499.69	3252.58	3702.98	2561.91	5907.23	3548.15	2501.01	2783.07	2356.58	3237.07	3784.59	2370.74	4456.2	3079.68	3446.45	4054.15	4467.16	3315.03	4374.85	2857.98	4462.3	3623.81	3083.17	3677.63	3117.78	3985.99	2190.84	3713.5	4387.93	4341.24	4552.77	4364.06	3271.45	3129.55	3511.57	5590.06	4262.7	4242.31	6190.67	4471.54	2936.67	2990.26	3124.06
ENTPD2	52.1241	32.0211	61.9209	32.7758	40.0746	34.9401	68.7388	69.6401	41.2193	25.0839	37.3166	69.9565	40.243	75.8058	70.9525	44.5581	37.2867	119.236	8.19289	20.3642	28.9259	69.3935	63.9593	60.0596	85.6	250.752	35.7419	37.9519	63.4432	24.8707	38.9728	73.7847	20.5547	822.28	45.1374	77.7432	1113.42	11.3954	130.824	66.5255	49.0574	146.197	152.393	38.046	69.7606	171.489	122.681	93.0756	83.1018
LY75	456.154	521.932	511.496	701.004	476.881	321.976	669.211	423.163	569.449	368.358	406.861	486.748	447.214	542.248	560.284	588.198	524.859	550.3	404.93	707.776	572.008	457.003	558.644	403.367	736.094	628.491	606.253	633.968	839.258	656.201	695.432	899.953	513.984	827.69	451.376	1094.44	1172.36	656.741	727.219	432.446	715.674	638.19	1020.05	378.807	673.86	726.932	559.165	399.68	580.086
ARID4B	3930.51	3852.26	3458.53	3334.4	3631.71	3164.11	3833.14	3445.19	4265.02	3852.2	2489.27	3480.14	3446.57	3511.98	5099.68	2532.02	2688.9	3533.12	3168.84	3355.64	3326.5	3131.65	3149	3295.31	2592.56	5056.56	2937.76	3269.29	3348.72	4372.76	2895.87	3442.55	3987.9	2342.63	3073.8	4146.36	3089.9	2925.86	3551.61	3659.92	3551.92	4621.56	4123.78	4414.61	2601.33	4414.36	3365.08	3348.49	3867.7
OPN3	216.886	392.794	392.157	356.114	278.515	354.581	430.86	381.59	241.955	287.432	392.579	357.533	415.333	403.514	515.778	299.048	494.144	422.522	174.864	327.022	303.241	464.45	386.754	421.332	302.804	166.636	475.956	268.57	348.909	979.307	322.165	240.646	270.157	320.776	350.947	274.562	98.0952	220.806	262.668	245.307	387.708	122.929	151.367	223.667	243.448	267.486	404.017	403.024	406.464
SDCCAG8	1628.24	1590.77	1510.29	1715.93	1947.6	1620.89	1376.3	1544.45	2089.72	1265.13	1266.58	1504.95	1687.15	1444.95	1550.57	1522.98	1800.25	2025.65	1971.44	1897.57	1652.7	1570.63	1769.87	1592.96	1593.33	1802.91	1978.46	1533.8	2058.19	1496.57	1741.8	1490.28	1430.05	1340.49	1844.3	1907.58	1550.27	1307.78	1674.86	1354.83	1643.36	1617.91	2247.44	1639.05	1531.37	1581.12	1228.94	1595.02	1668.27
PTPRN	0	0	1.75211	5.62087	4.00781	3.41209	15.8288	1.7688	2.13485	6.51755	14.1395	0	0	3.12644	3.19525	0	0.0315911	7.8592	38.7338	3.36387	1.158	1.09689	0	1.7498	12.4876	4.04648	6.30154	2.67958	11.8622	4.74607	6.50504	0.245524	7.18635	2.43027	3.26259	0	49.5612	19.0147	26.7909	1.60603	7.95217	10.2458	35.2518	1.87888	5.59098	0.0339467	35.7365	18.4403	85.064
HHAT	476.638	474.72	426.233	558.543	520.962	422.137	522.563	448.487	531.418	413.946	336.688	489.664	525.595	499.176	560.283	459.466	616.883	508.565	534.788	417.286	555.348	464.475	559.644	552.2	989.793	1204.05	602.049	503.721	430.462	502.809	544.076	669.167	672.098	650.94	517.557	1119.41	1383.63	244.59	581.986	568.211	448.046	879.936	921.574	591.077	561.009	774.378	1204.7	591.417	767.625
KIF1B	3463.15	4701.99	3628.13	3899.51	4255.86	3251.92	6199.43	4741	3660.73	4125.69	3198.76	3729.83	4790.71	4477.72	5677.97	3519.29	3569.85	4491.18	4261.92	4569.31	3697.48	3887.6	2922.14	4791.49	3539.57	3449.69	3194.13	5021.09	4632.95	6379.12	2453.91	4058.2	3873.29	4290.61	3091.38	5199.52	2922.26	3278.99	3731.87	3730.72	4465.1	3661.6	4264.77	4349.88	4238.88	4009.93	4182.79	5059.43	3381.8
FOXC1	285.773	230.634	671.254	237.069	298.552	269.081	1751.83	727.033	138.432	379.521	297.217	539.214	1574.99	464.069	2201.75	133.676	124.966	625.947	527.631	413.022	328.808	417.502	290.815	312.813	1608.91	215.665	478.079	119.322	365.199	776.557	477.216	482.726	1308.94	259.993	367.598	376.309	2342.33	361.663	1272.11	502.413	244.904	1363.33	635.481	691.964	649.542	991.174	650.993	149.366	342.665
TBC1D22A	2441.9	2600.82	2325.12	2617.48	2682.95	2682.33	2122.3	2599.72	2167.92	2364.71	3761.24	2297.74	2450.08	2706.56	2693.37	2923.17	3200.56	2502.04	2580.88	2474.14	2151.41	2344.74	2595.35	2896.4	2787.8	2518.01	2823.22	3187.92	2694.39	2550.52	2592.27	2592.1	2026.74	3377.43	2751.37	2640.07	2670.73	2398.56	2543.2	2486.3	2600.86	2474.61	2099.22	1881.76	2800.47	2059.99	2664.43	2101.44	2323.19
SYNE2	16563.7	18105.2	10669.1	11458.6	13827.5	11675.9	10300.8	11257	14498.1	14165.1	13709.5	10440.4	9862.8	12630.9	11329.5	12643.3	7719.32	11455.7	9300.97	10911.8	8285.71	8501.25	8508.59	9894.01	7750.5	10444	6725.53	13945.4	11597.8	6834.83	8647.73	10157.4	13377.7	7606.07	9375.6	8567.28	12125.6	11540.7	15713.4	14757	12366.9	8837.06	5760.66	10087.5	10791.4	12556.1	7981.91	10587.4	7080.45
PLEKHH1	204.816	271.71	61.8657	124.623	281.519	79.9783	102.047	188.083	344.365	154.411	60.3634	125.323	85.0844	164.249	199.114	126.747	170.941	152.985	133.958	139.64	144.413	156.967	138.911	165.829	333.039	448.961	121.897	281.307	293.69	68.546	104.889	129.662	174.246	266.908	235.344	111.345	925.084	514.035	491.302	193.038	157.907	140.149	147.217	233.196	95.2095	98.1839	243.029	132.116	125.596
ATP9A	3452.92	4409.85	2995.47	3667.1	3768.96	3735.9	3710.54	4665.06	2998.32	3719.17	4456.5	3493.74	3457.98	3708.96	2794	3244	3277.29	3812.2	3290.52	3446.77	3089.94	3361.21	3786.59	3727.4	4628.57	5169.34	2246.41	4067.87	3378.63	2758.27	3316.47	2952.74	4464.03	5824.22	3307.45	12713.7	7221.05	4372.62	4647.59	4116	3704.2	5836.05	5041.22	4638.28	4771.1	5545.73	4606.25	11332.5	4229.79
CBLN4	191.875	49.8403	123.89	18.7081	59.1096	33.8286	208.319	216.285	101.411	18.5663	13.2136	77.7232	124.87	51.7666	360.93	17.8187	0.042354	62.5647	146.205	13.543	15.6119	47.0055	23.9844	46.5754	4.19984	17.8777	88.256	19.8432	68.8623	30.7764	58.474	77.7094	126.068	11.8031	55.2401	90.2507	33.1417	17.1059	18.5574	87.7095	62.837	21.4284	14.5336	0	11.1246	62.566	87.817	96.4156	22.1291
CHRDL2	20.4432	40.0349	27.7664	69.3413	51.0949	96.7783	326.069	67.8044	46.5061	128.418	16.5028	19.4156	143.2	53.3682	206.428	78.2281	90.9326	14.7056	160.514	54.4647	23.3836	55.5408	46.9699	85.1671	47.0013	57.9798	50.4502	37.0364	97.8984	59.0562	43.6098	90.4959	23.4688	77.3475	101.281	41.2586	257.317	1936.59	42.2489	65.6819	65.1842	211.615	120.263	116.108	83.0338	24.8507	129.188	151.602	28.5923
FAM168A	2714.67	3378.42	2766.64	3059.82	3177.87	2695.85	2828.18	3257.12	3226.5	2647.51	2926.78	3280	3505.95	3055.05	3415.68	3076.65	3240.02	3162.78	3328.35	2765.41	2368	2684.27	2795.22	2983.35	1604.83	2626.7	2396.65	3679	3089.53	2412.45	2759.4	2215.1	3192.37	3355.23	3072.14	3834.35	2392.13	3907.2	2586.46	3159.1	3206.95	2876.28	8442.4	3742.61	3176.68	3196.73	3185.45	3923.76	2983.67
RELT	740.08	1225.57	1733.76	1747.8	1210.24	1188.68	1549.31	1540.84	1074.46	1972.16	564.79	1487.46	1604.25	1389.14	3068.24	1059.55	1998.56	1768.31	1643.21	1231.51	1329.51	1240.71	1522.03	1350.02	1565.13	1304.34	2040.44	1505.77	1303.22	3680.92	1227.42	1196.39	718.822	1441.11	1174.24	1214.43	708.486	1549.56	854.95	1148.29	1553.96	873	902.93	952.774	1785.8	1739.62	1989.09	1096.66	1969.46
GALC	2601.08	3982.29	3935.94	3966.05	4883.02	3385.86	3275.11	4256.32	4379.13	2952.62	2466.25	3715.26	4154.77	3343.69	4955.65	4094.61	4633.76	4612.03	3885.63	3876.02	3478.67	3430.62	3941.49	3292.61	4296.54	4172.2	3858.16	4908.04	4170.73	6056.91	4066.68	3899.2	3312.96	4852.51	3098.09	3699.94	3865.59	3654.96	4217.02	3023.34	3985.54	3031.1	5627.94	2318.65	2745.18	2802.01	2931.82	4043.2	3755.92
NOP58	1948.48	1975.54	2215.64	2104.85	2187.04	2192.71	2998.89	1881.72	2426.75	3936.89	1497.97	2019.88	2470.64	2106.84	3895.45	1810.14	2309.77	1889.11	2951.03	2682.82	2587.89	2146.14	2414.46	2300.26	3525.97	2995.34	2485.95	1881.97	2431.56	3400.22	2218.1	2519.97	2258.97	1794.75	2161.69	2888.72	1965.91	3317.07	1958.13	2384.27	2086.61	2789.42	3974.5	3686.46	2693.15	2680.12	3132.63	2419.52	2887.61
SZRD1	8019.29	6241.09	6745.67	6561.04	6420.86	6509.41	6995.92	6134.44	5507.47	7698.83	9079.68	6055.76	8020.51	6973.74	8086.44	7426.75	8187.15	6288.16	7100.48	6756.43	7209.43	6807.83	6506.86	6929.49	6801.39	5110.38	7612.3	6484.34	6693.83	8474.1	6028.52	7178.94	5643	7260.67	8870.6	8441.53	5611.86	8650.09	5499.44	5521.47	6130.21	5531.53	6373.31	6375.38	6448.5	6075.3	5000.45	7614.44	6586.26
KCNH2	266.235	537.136	418.194	374.863	573.057	444.594	268.187	363.506	370.828	324.651	559.209	427.492	187.021	235.181	439.529	402.035	252.043	375.568	191.223	483.8	227.729	348.084	226.855	493.074	204.665	259.842	239.576	342.748	299.056	257.345	464.25	260.924	312.199	304.41	91.2026	339.847	384.897	761.507	429.526	316.143	278.017	140.132	317.219	221.76	241.243	625.481	278.757	463.879	387.975
CUL1	3761.07	3808.6	3897.35	4212.53	3937.27	3627.86	3958.06	3249.86	3806.52	5124.81	3907.13	3474.31	3956.22	3861.26	4362.55	3979.75	4362.03	3968.68	3605.46	4582.94	3911.83	3648.43	3762.61	4059.08	5262.34	3689.98	4315.21	3858.04	3813.65	5062.02	4247.74	4551.72	3577.16	3384.53	3709.5	5121.75	3871.51	3376.07	3543.38	3585.7	3354.41	3381.17	3847.01	2856.44	3147.93	3106.15	3078.11	4012.22	3028.92
FAM114A2	1107.83	1179.27	1179.16	1179.88	1099.03	1162.77	1212.41	1214.4	1122	1043.74	988.045	1285.38	1693.31	1103.64	1106.8	1237.79	1400.32	1150.16	1590.04	1294.56	1533.84	1285.55	1175.25	1180.6	1110.95	1233.26	1274.5	1257.07	1146.44	1174.36	1288.71	1100.19	1694.06	1231.6	1214.43	1784.7	1029.61	1081.25	1015.64	1138.16	1187.16	1237.72	1473.08	1382.06	1318.92	1403.16	1129.78	1634.03	980.064
CYFIP2	2427	2590.14	2459.74	2705.58	2694.98	2638.43	2197.92	2307.64	3125.07	2400.06	2015.54	2198.65	2024.08	2605.28	3395.55	2933.07	2122.41	2431.62	3442.87	2101.94	1810.44	2440.83	2196.6	2069.86	1849.15	2679.03	2371.43	2843.35	2843.03	2550.51	2683.27	2789.82	2244.46	3274.46	2427.19	4196.29	2575.13	2068.27	2205.35	2530.96	2750.75	3187.67	3491.43	2993.51	2812.66	3870.79	3265.11	2943.15	2732.41
TAB2	5649.07	5418.11	4628.73	4139.42	5113.44	4961.69	4509.26	4423.59	5156.7	5605.75	4921.46	4134.97	4582.25	4437.82	5493.69	4896.7	4681.98	4664.18	4124.91	4555.67	4493.83	4047.76	4384.21	4302.9	4344.58	3425.97	4334.13	4737.1	4342.92	4783.52	4450.14	4823.57	5226.24	4154.85	4617.42	3673.05	3540.95	3614.97	4417.89	4549.37	4727.01	3941.12	4983.17	4698.24	3562.86	3545.11	3787.71	2874.29	3553.6
GINM1	3898.86	3326.74	3785.19	2866.76	3561.58	3663.86	3421.76	3237.21	3082.83	3083.8	3932.34	3477.23	3645.12	3759.21	3308.72	3333.12	3510.66	3795.69	2924.45	3706.55	3469.77	3036.62	3835.56	3331.17	3306.73	1824.08	4324.66	3068.52	3253.56	3058.03	3821.57	3745.67	3395.65	3162.07	3525.28	2195.57	2360.25	1842.69	2867.66	3037.69	3152.15	2132.24	2516.99	2833.6	2850.28	2581.99	1844.22	2427.57	1962.92
EIF2AK2	4293.57	5832.28	5495.62	6748.49	5780.67	4119.76	4993.99	4783.48	9783	5328.52	3546.38	5762.35	5469.21	5648.39	4937.66	5251.21	4573.52	5086.69	5260.94	4640.83	4599.35	4026.41	4518.12	4511.77	3290.03	5234.65	5055.96	5498.58	5134.11	4758.75	4298.79	4679.45	5670.47	4590.34	3566.26	6084.66	3882.16	4385	5061.67	4940.58	5437.1	4529.47	5865.35	4163.31	4056.34	4030.44	5176.06	4500.26	4506.91
USP36	2228.7	2478.79	2261.4	2497.52	2387.41	1954.1	3848	3018.4	2581	4013.16	2629.62	2231.68	3196.35	2654.71	5970.24	2570.64	2091.74	3770.5	2818.11	3188.73	1925.96	2304.17	2101.66	2440.1	1903.44	2568.68	2313.65	2487.91	2762.36	4720.85	2479	2638.34	2180.62	2419.86	2335.08	2465.35	2202.02	1853.17	2373.24	2345.5	2361.47	2847.92	2455.82	3253.38	2461.9	2427.75	3258.65	2914.41	2704.71
KMT2C	5151.92	6389.86	4760.64	5718.54	6798.55	3756.2	6954.63	6414.78	6361.09	6789.97	4153.88	5834.24	6545.59	6432.3	7801.52	4842.24	4474.91	6051.71	5466.47	4430.45	3358.74	4416.13	3749.61	4695.54	2729.34	6932.18	3734.19	6441.85	6549.75	4994.8	4127.95	3880.89	6275.82	4019.06	4413.05	6982.29	4180.87	4069.94	5971.2	5926.2	6509.07	5319.09	6085.12	4976.18	4370.57	6280.2	4691.6	6855.39	5172.01
MCOLN3	639.575	761.578	685.623	506.995	819.512	524.547	664.621	717.094	852.557	431.623	391.509	580.024	289.711	635.589	437.434	418.866	241.103	569.436	105.334	686.486	484.275	669.455	372.763	529.787	385.293	424.938	454.962	593.269	523.825	505.167	388.077	739.299	641.626	210.788	434.727	210.231	108.721	286.487	396.566	651.017	619.947	111.743	110.941	143.703	218.011	256.707	730.946	119.502	341.781
CCDC85A	2442.85	3040.88	2110.66	2024.26	2659.91	2864.63	1946.95	1586.04	2681.34	2475.43	2784.19	2332.73	1210.13	2153.93	1717.92	2377.55	1664.41	1806.54	1083.9	2484.4	2061.43	1412.62	2615.34	2482.26	1247.74	321.085	2025.75	1448.78	1757.28	1238.14	1673.08	2392.26	1071.58	1279.46	1461.69	672.974	499.491	309.316	2084.76	2334.08	1531.55	254.527	345.221	289.333	786.698	314.965	924.216	469.712	568.081
PUM2	9285.39	8620.15	8492	7944.29	9608.74	7897.29	7532.23	8087.63	9870.73	7749.05	7255	8062.04	7521.47	8235.32	7696.69	8689.29	7846.4	8325.98	7504.38	7350.9	7262.76	7561.64	8540.57	7452.1	6881.79	10457.9	6889.43	8504.71	8006.14	6336.75	7782.41	7811.28	8783	6438.89	7417.37	7726.29	8581.27	6888.26	9272.51	8022.14	8465.94	9552.72	8392.7	10207.5	7323.73	8395.18	6302.6	6949.61	7492.44
MRPL43	3209.96	2092.22	2386.15	2121.72	2456.54	2796	1850.72	2000.19	2007.33	1932.13	3456.39	1814.87	1989.86	2240.83	1700.98	2594.41	2915.68	2111.68	2102.33	2404.31	2557.9	2271.06	3151.99	2340.6	3296.27	2791.83	2651.96	2258.21	2316.46	2174.03	2413.08	2102.24	2202.35	3006.35	2980.02	1841.32	2758.11	1976.9	2487.57	2055.45	2092.25	2233.75	1672.13	1997.88	2392.2	2001.75	1802.78	2133.6	2030.36
ITIH4	3.69239	14.2779	15.2894	8.42204	10.0187	2.31219	15.9873	16.3163	9.51524	13.9692	4.42715	6.7924	6.00186	9.54533	10.5939	8.9105	5.51406	7.79316	8.18506	12.794	13.31	19.1745	6.99537	4.43808	2.10987	10.6171	19.9265	8.11856	17.266	3.62219	14.8765	7.60423	11.6012	2.42325	3.27422	7.6709	2.4479	11.4237	9.27411	16.0865	4.75705	4.24065	11.4017	20.026	5.57059	16.1441	14.6889	0.0557796	14.8041
ITIH1	7.43787	5.31068	3.54692	22.5805	6.01157	4.54691	11.4277	12.6927	7.40358	9.30404	8.77535	1.92966	7.57553	16.0913	9.52979	1.97585	2.23569	7.80992	10.223	8.50951	6.6865	11.7282	11.9925	8.96342	8.35578	12.3159	8.4086	2.6696	1.76768	1.2645	8.35162	10.9564	8.72607	11.7026	4.95921	6.70772	18.7829	23.8462	12.3583	3.29812	12.9193	8.57405	22.7713	5.69325	4.47103	24.7172	16.3313	2.36861	32.4732
HPF1	864.867	709.873	828.295	703.799	766.415	782.301	621.125	735.15	774.405	583.255	816.951	751.989	687.614	691.369	479.806	649.591	723.178	617.227	778.149	630.22	962.937	634.242	811.484	694.729	732.974	612.101	773.314	718.967	667.013	614.943	858.838	833.773	904.372	702.465	908.735	787.215	542.009	670.062	784.904	853.202	751.93	617.533	715.296	718.622	487.998	633.115	662.396	678.695	558.834
ZFR	4553.31	4538.97	4880.9	4842.3	5111.44	4942.56	4755.63	4432.63	5362.72	5348.06	3812.84	5286.28	4620.28	4547.87	4866.7	5048.21	5015.07	5167.55	4699.57	5027.51	4928.1	4426.8	4696.01	4591.56	4263.14	5418.56	4951.94	4410.61	4718.12	4853.16	4543.91	4708.98	5303.19	4466.25	4158.43	4635	4297.76	4638.18	5052.4	4411.94	4984.12	4236.16	6125.55	5556.8	4339.59	5479.95	4138.05	4293.57	4837.62
ZNF280C	208.519	262.749	215.352	230.531	313.579	264.524	242.955	279.415	288.418	221.388	83.3924	206.937	270.031	208.089	296.552	222.801	238.878	268.632	416.16	275.094	212.164	330.982	249.841	221.401	183.778	412.818	285.788	218.839	300.895	148.783	207.031	179.603	384.532	192.067	181.678	375.37	181.906	252.216	247.221	259.632	244.149	546.254	417.765	251.27	230.182	277.198	187.682	297.442	410.147
NPFFR2	5.60237	0	7.2351	5.63847	4.00746	0.0369332	2.33093	7.28718	2.12949	0	2.22034	9.74511	7.76399	0	10.5212	0	0.0283456	1.69394	0.00679414	0	0.0326608	4.27026	5.99638	0	0.0132311	1.5694	0.0151797	0	20.2491	0.0523121	5.58784	0.213231	16.3553	0.0730088	19.1992	3.81836	1.27007	3.78105	8.25668	3.28745	7.95374	1.64834	3.12958	982.987	2.26844	14.0584	6.39921	2.37408	38.8005
PHF21B	3.69414	23.2983	10.7759	0	0.000696993	10.1288	28.3851	17.2449	2.13995	7.42821	8.78188	7.76758	5.24107	6.32328	14.8023	3.95686	4.42028	13.0765	10.2248	13.676	4.4856	9.61148	3.99719	27.0672	8.35861	3.18603	12.5968	5.39391	10.8829	0.066407	3.68306	0.289031	11.5549	2.42421	16.8201	11.5205	24.5975	16.1987	12.3586	13.5143	8.01339	5.10445	41.3675	1.87971	6.67263	4.34804	19.6322	1.21985	5.51331
TRAF1	856.465	826.536	936.856	868.731	843.558	863.373	1150.52	1173.72	776.534	1951.73	480.35	931.725	985.791	834.085	3914.38	743.662	741.828	1083.23	1244.42	1107.19	697.548	1373.08	779.504	929.59	582.637	1658.33	699.782	998.413	821.071	2099.49	681.468	893.162	866.796	549.148	1241.22	1886.46	956.426	1649.49	836.413	1518.42	1076.72	1996.42	1407.77	2267.29	1379.78	2475.15	2162.99	910.668	3729.25
RC3H2	3799.24	4545.23	4382.86	4062.58	4155.67	3670.63	4206.72	3922.64	4511.19	4116.4	2858.82	4031.99	4608.92	4110.09	4310.65	3562.86	3092.12	4222.55	4077.87	3692.05	3727.46	3645.22	3561.73	3572.31	3326.57	3240.47	3429.48	3411.28	4104.57	3911.33	3008.22	3359.43	4474.22	2744.15	3555.43	2723.59	2793.55	2997.26	3617.53	3866.51	3634.15	2959.72	2592.66	3114.4	2412.13	3477.14	4047.91	2675.6	2673.29
IL17RB	290.43	370.494	422.645	603.533	456.844	463.775	253.32	494.613	437.398	384.176	291.732	540.188	345.258	250.305	657.711	485.213	989.356	349.442	248.487	640.485	448.739	752.726	498.683	1079.41	368.588	1809.9	687.147	631.26	265.499	800.132	402.935	410.663	354.381	1421.03	476.524	806.43	534.891	456.856	359.5	305.974	384.374	389.59	776.444	310.276	531.127	409.865	864.082	745.242	1682.26
TRAF3IP2	1878.68	1354.72	1250.03	1491.95	1543.85	1661.41	1652.45	1428.7	1429.44	2826.17	1667.91	1356.3	1691.71	1602.86	1861.95	1591.3	1982.14	1480.52	1612.54	1601.16	1549.42	1498.03	1613.97	1432.49	1794.84	1663.96	1731.55	1713.78	1838.86	3236.07	1579.31	1506.92	1656.48	2338.97	2061.28	1819.26	1656.5	641.499	1483.27	1355.69	1715.13	1623.95	1686.62	1401.09	1450.59	1647.97	1098.08	1524.96	1140.8
GYG2	53.9678	67.6599	43.0262	106.839	62.1153	40.583	121.442	81.3647	54.9596	42.7588	107.46	68.9728	130.14	70.119	84.7397	45.5462	116.133	19.0522	58.2928	56.1539	101.073	118.507	67.9566	46.5682	282.868	363.418	59.908	54.224	82.4554	70.8641	105.848	125.527	156.539	171.009	76.9616	999.441	546.625	663.436	252.374	158.422	54.695	511.799	250.883	244.602	447.015	92.7973	596.671	136.73	103.416
DCBLD2	2058.34	2594.59	2256.02	2368.19	3112.75	2276	2353.76	2404.4	2858.84	2550.77	1773.2	2525.09	2627.35	2335.72	2231.59	2244.86	2332.78	2379.46	4101.37	2347.23	2132.53	2532.65	2449.44	2843.52	2963.2	2267.92	1821.92	2633.53	2698.02	2360.5	2261.74	2346.24	2717.65	2513.57	2242.06	2798.46	2107.63	2012.11	2145.61	2157.43	2532.28	3708.02	3593.03	2935.43	1500.43	2613.28	8879.41	4182.19	3968.37
SERPINB3	59.5423	0	2.64256	35.576	2.00458	29.3373	10.3903	2.66645	0.0254363	3.68675	0.0434833	13.5866	7.48328	30.9851	6.38483	0	4.43032	1.67674	2.05582	4.18493	31.1622	10.7131	83.9462	1.74368	7533.73	0	4.22787	24.3642	1.76803	0.0811102	17.6015	57.7932	69.9337	25.8499	61.0481	13.4193	5098.64	170.353	3407.08	8.35129	16.8214	950.705	8.31178	9.49364	317.57	25.9279	0	9.26229	1.81154
SOAT1	1878.64	3400.66	3246.73	3752.38	3075.68	2204	5372.09	4786.22	3210.67	3266.12	1529.78	3533.58	4399.72	3066.97	4413.39	3476.71	4540.62	5200.62	4667.87	3185.28	3643.05	3461.58	3230.94	3012.91	3712.89	9457.79	5100.07	3962.05	3613.36	8158.81	2797.45	2984.2	2790.38	5455.47	2995.03	6756.68	4576.4	3514.08	3301.32	2990.43	4512.6	4686.01	6168.05	4045.28	5235.82	4840.4	4618.43	5276.51	5181.25
PKP2	171.261	129.091	115.706	248.322	653.205	144.146	1829.54	93.0832	135.261	306.033	97.6509	419.713	210.595	267.071	296.575	146.549	172.075	652.953	69.5453	171.965	193.312	1040.94	268.829	145.168	936.525	1181.28	406.626	172.686	2587.98	219.605	253.443	229.62	114.941	835.783	200.093	156.463	1166.29	261.727	999.121	133.966	210.262	336.267	109.906	254.118	206.963	302.015	395.799	334.21	82.1689
MSH4	5.56126	9.79012	16.2008	10.3069	18.0321	5.67152	13.7155	18.1465	21.0783	17.7169	0.0364166	14.5826	11.4245	20.917	6.37284	7.91986	12.0426	12.1871	2.05605	4.19519	6.69564	9.61514	3.99718	8.04765	7.31965	6.48325	6.31984	10.8538	10.8769	0.0672964	8.34366	7.5858	0.163507	2.40675	8.41985	6.72225	3.59446	0.930352	10.2849	7.61408	8.93219	5.14206	0.0124573	22.0032	4.44806	15.0048	8.17327	2.354	14.871
F7	9.29874	15.1727	5.34407	1.84299	10.0187	2.31258	9.19144	3.57238	20.0346	3.68884	12.0587	3.87334	18.3881	4.69877	19.029	5.93787	10.9611	21.8451	15.3314	6.76651	11.1103	11.744	14.9906	7.14102	14.6073	16.4159	14.6975	5.38892	7.22316	4.79545	18.6098	4.06172	10.2057	14.0415	4.95212	3.82081	18.8247	5.6906	26.7523	15.1947	13.7057	3.3712	41.3871	1.87923	4.47498	4.35063	16.293	9.22353	18.5014
GDI2	9759.23	9162.56	12375.9	11389.3	11136.6	10795.7	11349.3	9687.24	10856.4	10390.1	9008.44	11631.6	11090.5	10075.8	11091.2	10027.1	13196.7	11829.6	12085.3	9246.75	12378.5	9810.28	12462.1	9381.24	11727.5	12000.9	12472.8	10022.2	10326.2	14042.5	10426.7	10922.8	9826.87	14039	11215.7	11509.8	10760.9	12943.7	9771.06	10222.6	11422.2	9256.77	12089.4	10508.2	12034	11187.5	10895.1	10251	12159.2
PRDM1	2494.08	1698.56	1289.53	750.636	3157.83	1187.55	4940.92	1036.24	781.824	1476.31	629.487	860.794	1525.13	919.389	3537.41	987.259	662.952	1620.51	1598.22	885.697	1399.47	2121.55	1931.77	917.02	867.68	941.435	779.64	928.754	1955.79	1403.33	700.959	1041.15	2344.35	1853.21	2172.65	867.847	1269.29	2345.28	2670.9	1343.03	1599.84	647.613	1149.65	889.944	920.626	1004.13	1232.19	854.41	1367.12
ATG5	2079.76	1876.68	2210.28	1923.05	2073.83	2238.83	1653.61	1657.48	2317.92	1616.78	1778.67	1905.24	1603.44	1891.55	1509.27	1917.09	2059.94	1936.95	2056.32	1745.09	2229.13	1779.91	2108.66	1747.15	2372.23	1364.8	2065.67	1780.7	1950.32	1980.45	2104.84	2124.26	1617.33	1712.78	1807.4	1875.88	1845.46	1612.36	1886.03	1587.52	1791.63	1761.53	2140.68	2180.64	1686.29	1560.64	1498.78	1366.55	1630.38
TMCC3	1581.69	1484.77	1669.14	1227.66	4183.72	1713.19	2415.58	1265.93	1542.48	1040	1099.91	1722.58	2515.62	1495.99	2189.21	1864.61	1440.88	1804.81	1610.49	1360.96	1034.09	2732.28	1487.05	1256.78	1116.18	786.133	1008.69	2112.63	2168.76	1639.37	1329.55	1224.17	3073.01	1386.1	1989.29	856.332	1157.1	718.6	3659.7	1725.89	1466.09	606.335	644.811	761.449	965.971	972.84	719.278	1584.64	985.614
PITHD1	2868.28	2644.47	2772.93	2296.96	2419.47	2960.35	2412.21	2499.34	2517.61	3021.48	3295.22	2108.29	2082.65	2456.93	2240.07	2592.43	2994.58	3103.67	3693.39	2604.45	2475.72	2352.21	2478.42	2532.43	2823.3	2410.12	2681.38	2827.97	2291.98	3250.36	2719.48	3004.28	2144.32	3006.36	2512.64	3639.47	2446.42	2412.84	2470.06	2299.12	2457.38	2477.18	2397.77	2471.9	2773.92	1779.58	1731.25	2719.22	2301.94
MTA3	1738.1	1535.55	1282.35	1357.93	1801.33	1694.04	1360.24	1388.92	1549.87	1243.74	2125.15	1281.49	1425.46	1310.18	1189.42	1489.31	1760.8	1507.48	1733.19	1517.7	1478.33	1379.51	1357.14	1541.87	1197.61	2106.99	1272.4	1787.05	1360.32	1066.99	1558.89	1329.44	1612.89	1447.02	1740.43	1737.65	1517.22	1814.16	1433.84	1737.63	1335.45	1993.81	1613.03	1927.46	1909.76	1454.94	1422.4	1477.91	1465.04
USP13	1415.04	1688.75	1696.06	1967.1	2211.08	1452.06	2064.96	1614.98	2082.33	1686.55	1284.13	1710.92	1900.15	2247.27	2297.24	1587.34	1574.55	2519.48	1479.61	2445.24	1694.91	1699.83	1162.26	1740.88	1572.45	1763.67	1594.97	1697.5	1923.14	1516.64	1576.53	1702.84	1565.05	1107.55	1508.4	1885.49	751.011	1071.72	1149.55	1415.53	1391.86	1926.71	1521.81	2945.95	1410.77	3426.39	1751.62	2318.42	2383.27
ATP11B	3785.27	4098.97	4757.06	4846.99	4742.76	3631.24	5147.51	4130.62	5446.17	4691.3	2360.98	4347.75	4666.7	4527.15	6209.65	4077.78	3775.84	4845.89	4734.33	4055.72	3365.39	3930.31	3974.47	3521.2	4124.27	7456.95	3594.45	4093.18	4637.47	4728.04	3046.28	3956.57	4387.18	4310.52	3458.23	3764.26	3987.21	3229.49	4025.44	4215.52	4008.09	4034.9	4118.6	4983.81	2928.85	4474.77	3705.64	3727.45	4715.7
LAMC2	4852.14	8404.62	5756.74	6574.16	5629.39	7014.8	8076.51	3835.8	5209.54	18035	11888	6128.62	4024.61	7205.02	5762.73	6818.74	5980.41	4704.14	4741.5	4892.05	5350.18	5417.66	6060.14	8506.35	10780.5	7375.93	5352.26	5073.5	5344.36	9443.04	5196.61	5740.7	5901.39	7230.24	4354.39	4385.39	7447.8	1167.85	5674.55	6366.27	5595.83	2865.92	3682.19	7216.8	3484.31	3279.81	5047.59	2326.56	3348.52
CDK14	3096.39	2732.67	2510	2251.99	2456.54	2265.86	2156.66	1977.58	1876.33	2313.55	2421.25	2287.06	1557.77	2648.37	2026.12	2529.06	2112.54	2195.16	2003.15	2888.96	1642.73	2184.57	2307.53	2309.23	1762.48	1647.58	2395.59	2543.1	2237.62	1680.71	1894.06	2451.5	1779.94	2293.36	1899.58	861.126	1274.02	1140.26	2284.64	1936.62	1959.33	1171.46	1314.48	2979.27	1258.08	2298.3	1183.41	2128.95	1493.67
SEC61A1	8494.06	8898.92	8287.37	9827.04	8593.87	9085.94	12028.8	8995.49	8766.72	10244	11530.6	8785.85	11426.8	9379.65	9141.35	9976.6	12197.5	8997.12	16996.5	9175.21	11252.3	10330.3	10099.6	10725	9666.45	15503.8	9996.34	9655.97	9859.49	13163.2	11997.7	10756.4	9427.64	17535.9	10598.4	11028.8	10510.6	18865.9	7884.01	12209.8	9827.98	13893.8	14159.6	12169.2	11386.7	12857	16494.7	24876.9	14221
PPP1R12A	4854.95	5744.11	5131.28	4566.77	5132.48	4510.33	4476.03	4362.1	4807.01	5169.45	3435.62	4950.12	5784.16	5398.79	5559.36	4321.38	4015.8	4599.84	4056.4	5357.98	4945.87	4409.72	4281.28	4595.15	3866.38	4002.99	4445.5	4349.11	4510.58	4444.8	4412.07	5289.4	5544.14	2903.38	4021.94	3005.84	3441.74	3861.5	4667.15	4863.06	4959.2	3055.18	3025.98	3991.99	3241.97	3848.15	4987.54	3439.22	4063.53
RASGRF1	1641.27	3187.86	1344.26	2228.57	2934.42	1670.43	1002.76	1941.42	4058.96	1553.52	1834.59	1731.32	1244.37	1499.16	1091.99	1862.63	4134.02	1148.39	3244.49	1734.86	1251.78	2854.01	2433.45	1927.34	814.434	430.601	1479.4	2691.44	3134.9	1411.62	1474.39	1577.23	1522.99	2145.91	1634.03	1323.86	396.816	291.227	1106.29	1577.4	2550.92	1150.81	1304.12	3209.6	3106.93	1749.37	755.015	1947.56	769.435
CAMK2B	5.54979	26.7402	13.4268	13.0987	4.00838	3.44342	18.3584	89.8421	5.31188	7.40783	26.3029	6.78668	21.2873	19.9158	20.129	11.8791	12.0884	55.8438	12.2787	27.2837	15.5783	62.8662	7.99461	5.32436	19.8429	17.9479	23.1141	35.324	3.57497	10.6962	15.7658	23.9869	27.4907	4.77139	4.94032	107.516	56.7585	456.055	41.218	32.7938	33.7433	49.8179	326.485	195.149	32.1469	8.67096	467.924	51.7473	122.852
CROCC	3393.36	2649.82	1673.6	1996.13	2525.66	2325.52	2179.59	3003.94	2198.55	1809.33	3456.4	2880.69	2576.38	2817.42	2173.34	2836.03	2065.44	2116.03	1844.66	2017.62	2192.5	2230.49	2180.61	2890.14	5070.19	1955.7	1706.35	2689.6	2660.86	1425.8	2284.02	1898.95	2909.24	1834.52	3229.68	2391.43	7679.91	1563.82	5248.06	2482.11	2434.85	3678.9	2105.43	2261.56	2632.27	2491.37	2030.41	2335.67	2780.47
POLR3E	1651.51	1768.01	1891.69	1934.29	1811.34	1613.03	2157.79	1929.67	1801.32	2634.51	1774.29	1715.78	2110.09	1683.39	2681.7	1870.55	1884.64	1903.91	2260.82	2110.48	1739.35	1941.13	1938.77	2102.15	2326.29	2892.41	1716.85	1631.47	2023.73	2792.39	1945.13	1725.1	1790.07	1761.95	1869.39	2956.89	3183.09	3488.42	1731.52	2127.98	1640.1	2341.29	3959.97	4744.94	2248.35	2675.8	2757.93	2920.13	2992.93
ATP2B4	12179.7	15433.1	12783.3	15016.1	15509.6	11608.4	16533.5	11162.1	14073.4	17891.7	11399	12953.9	16171.1	15552.8	14263.3	13499.8	12967.8	12071.2	20972.2	11803.5	11125.7	9436.58	11616.6	14698.1	8900.07	12098.9	10573.2	17544.8	14250.5	15485.9	11471.2	10335	14556.6	13552	10575.8	8536.55	8205.85	6713.12	11517	12891.1	16883.6	5707.83	15374.5	6764.66	7761.9	8170.86	11987.6	8693.9	9690.95
ZC3H11A	8649.54	8357.39	7194.36	8362.27	9236.05	7721.69	8195.71	8084.92	10037.7	7936.96	7063.1	8775.17	8515.69	8520.82	7890.51	7734.71	6328.85	7932.15	7917.48	8073.99	7652.6	7847.79	7182.43	7269.23	6589.44	11823.6	7264.53	8435.98	7950.85	6496.08	8074.87	8515.61	9762.87	4940.42	7399.78	8997.37	7798.49	8191.3	8262.03	8743	8548.14	13149.9	12147.4	10290.3	6247.15	10093.8	8346.07	8970.62	8087.34
RIOK2	1153.46	980.637	1183.66	1125.52	1096.02	1167.26	883.549	929.552	1383.99	1121.89	935.405	1120.21	1084.69	1129.98	918.277	901.11	1038.75	950.199	1151.37	1108.04	1227.3	1049.58	1099.3	1107.1	1272.78	1225.92	1274.49	995.698	995.089	1206.2	1166.15	1179.55	1048.21	845.303	1168.37	1712.7	910.368	1007.01	927.054	1009.16	955.025	1131.92	1543.56	805.234	1075.51	1091.47	1199.71	1661.58	982.84
YIPF1	1004.49	905.812	1122.63	1070.23	956.767	1162.76	963.757	1081.48	985.71	808.374	1156.9	1000.71	1056.54	1035.87	884.387	1156.59	1437.56	1051.06	1534.82	1014.34	1237.3	940.681	1162.26	1019.24	1320.81	1923.98	1207.25	1064.43	937.081	1186.15	1260.86	1072.4	919.052	1605.07	1093.78	2074.62	1405.08	1235.44	1059.93	1058.87	1013.83	1356.4	2863.21	1219.28	1565.68	1347.09	1259	1309.13	1341.25
NDC1	584.618	880.888	979.95	826.565	902.667	871.235	930.504	888.872	902.242	830.711	686.487	961.848	959.2	918.658	796.475	938.74	1072.69	867.62	954.025	838.893	1123.99	786.926	1062.32	798.712	811.287	1170.38	966.642	945.066	806.581	651.547	1015.75	795.135	888.502	1137.96	824.09	1511.08	941.072	1534.32	782.85	829.554	959.044	1175.78	1834.86	1156.47	1112.03	943.729	1246.84	1568.59	1273.83
DGKG	201.986	381.199	543.835	422.653	379.701	338.84	550.021	364.394	387.739	644.697	379.434	299.233	629.92	398.7	599.45	337.667	397.757	750.353	496.95	597.076	565.313	450.583	352.775	357.658	233.901	179.71	440.245	348.161	353.431	481.532	508.806	434.526	233.923	498.628	180.848	238.076	233.826	504.487	417.162	321.218	364.319	78.1939	96.4282	183.685	277.74	181.222	327.566	227.408	233.686
FLYWCH1	2898.07	3597.54	2621.26	2786.17	3040.61	3676.22	3823.94	3222.76	2545.08	3654.07	2711.86	1968.38	3072.34	3212.96	3059.82	3220.24	2560.69	2791.54	2926.49	3836.04	2431.3	2235.84	3021.08	3186.85	2119.57	2814.69	2294.73	2802.64	2430.64	2240.14	2933.95	2494.2	2135.63	2349.61	2596.42	3390.83	3132.34	2184.4	2694.61	4253.57	3979.2	2670.74	2513.87	6220.31	2282.66	2256.27	2998.54	3903.04	3363.36
UNKL	1277.28	1825.09	1093.91	1256.73	1401.59	1315.83	825.117	1483.9	1416.74	922.8	1308.22	1180.45	1250.54	1423.49	819.784	1425.94	1048.61	1303.19	1419.27	1254.54	1171.78	1038.91	1096.3	1234.4	677.65	902.226	654.605	1520.27	994.179	489.889	1077.01	739.833	1222.38	1201.13	1206.09	1365.17	1168.88	1639.04	1280.35	1611.24	1350.84	1297.97	1646.18	2551.93	1233.7	1484.02	1168.84	1326.28	1583.32
TBXAS1	1552.81	2363.89	2894.98	2570.62	2067.82	2160.07	2523.36	3230	2350.69	2200.98	1612.01	2299.69	2744.48	2215.29	3961.12	2457.76	3258.63	4878.15	2581.9	2662.36	2544.58	3179.68	2598.35	2363	2516.33	2782	4443.37	2978.1	2533.97	4065.85	2595.06	2366.62	1007.74	5027.96	2026.86	1260.5	1140.63	2092.08	1587.32	2044.51	2903.96	1167.15	1513.52	1012.73	2383.33	1522.89	1411.81	1189.72	2136.6
PARP12	2668.11	3047.95	3526.74	3920.14	2639.87	2891.71	2727.35	3041.89	3831.86	3214.97	3538.67	3043.91	2899.63	2757.56	2326.92	4111.45	3908.39	2974.11	2857.99	3378.64	2941.1	3122.04	3196.97	3421.72	2481.88	2665.1	4060.94	3507.16	3307.04	4152.05	3610.81	3165.23	2934.03	3994.4	2982.52	3137.37	2244.55	2755.49	2186.81	2661.65	3258.54	2408.35	2552.24	1461.04	2519.45	2497.87	2469.31	3079.79	2774.9
ALDH18A1	1390.84	1379.66	1386.45	1300.76	1373.54	1320.37	1852.97	1524.56	1151.59	1305.14	1300.57	1290.23	2110.14	1377.96	1270.97	1545.75	1589.89	1015.38	2723	1337.97	1534.98	1751.07	1629.96	1464.77	2304.35	3747.44	1091.69	1310.41	1565.15	2040.61	1742.73	1689.85	2113.64	2995.86	1775.54	4411.33	3658.97	3920.52	1936.51	1830.31	1581.23	2595.86	4167.32	3591.26	3472.11	3295.96	3137.47	5742.63	3119.46
TARBP1	1385.25	1894.51	1721.18	2029.89	1744.22	1385.66	1595.16	2087.93	1760.11	1793.54	1171.18	1845.97	1709.2	1541.45	2154.26	1351.67	1527.44	1637.88	2078.81	1786.83	1624.94	2235.81	1836.83	1681.71	1270.7	3209.58	1531.93	1875.67	1734.63	1423.41	1516.17	1529.12	2068.69	873.427	1640.73	3451.32	1820.66	1588.56	1521.39	2447.55	1811.79	3474.18	2616.49	2766.99	1779.22	3140.61	2653.09	3410.41	2802.65
GATB	700.071	629.697	767.26	753.47	760.404	758.672	688.73	637.477	742.715	655.818	1146.99	731.585	676.192	677.004	660.908	696.132	1043.09	830.25	975.494	648.104	1071.78	771.971	870.446	722.518	766.386	694.656	774.367	828.404	805.686	816.73	662.912	626.942	601.136	1029.03	834.189	735.373	802.894	631.99	680.87	644.931	742.264	676.894	868.713	750.036	769.013	761.447	706.302	883.06	783.32
MXD1	1495.09	3193.15	2076.53	1655.94	2575.76	1131.3	3272.77	3087.12	1897.47	2970.32	1186.55	2230.71	3806.45	2830.96	14596.6	1255.61	1397.08	3139.31	3350.84	1759.53	1533.9	1451.07	1521.03	1351.79	4682.84	1085.25	1994.24	1453.28	2083.53	8904.5	1283.11	2606.92	2025.31	1512.56	1437.22	1140.5	1510.13	1053.64	2042.58	1676.09	1698.18	1075.13	990.012	1098.4	1580.05	2875.27	3479.91	1293.03	2330.62
CDK17	3481.78	3650.06	3966.46	3444.99	3547.55	3626.73	5738.77	3301.41	2867.32	6002.06	2476.12	3881.4	5095.78	3456.94	7235.92	3413.33	2958.45	4387.74	2817.09	3574.52	4446.05	2913.84	2949.12	3477.28	3957.21	1989.17	3909.65	2610.89	2639.08	5643.84	2807.66	4398.25	4019.87	1739.71	3314.25	1991.09	2152.43	2078.75	3169.46	3143.97	3332.75	1770.12	1586.08	2560.43	3826.12	2721.1	4483.68	2611.27	2535.66
DNAJC25	339.783	399.016	559.094	479.827	357.661	359.097	446.92	413.233	399.359	564.682	358.603	407.082	369.638	380.351	504.141	355.491	484.301	378.154	475.478	430.943	420.959	426.029	410.739	475.115	596.179	483.834	534.798	336.402	319.893	496.87	423.374	351.469	342.721	338.389	432.987	423.364	348.361	408.317	332.716	394.535	406.167	547.051	466.496	662.488	437.073	499.359	547.035	401.944	365.779
SLC2A3	5332.5	9460.94	15426.2	6665.05	6326.68	4127.68	18168.7	4793.4	4417.19	13160.4	8627.94	8395.28	15831.1	8677.86	71412.5	4628.34	10874.9	13164.9	11960.6	9455.41	6334.26	6543.05	7267.38	6786.92	26757.6	2583.31	11057.5	4529.05	8023.33	42667.5	6528.02	9392.13	9642.54	3720.54	5055.46	3505.04	6949.53	3267.56	3949.22	3898.47	4948.64	1442.38	1582.98	5873.76	6395.38	6880.93	5601.97	3322.13	8818.98
PSD	88.4269	73.0022	106.783	94.6431	92.1705	73.2044	114.592	109.411	87.7002	85.568	49.3912	87.4347	122.486	103.652	142.967	66.3421	54.8272	92.1304	241.29	123.507	55.5817	117.448	89.9426	55.5347	265.141	167.631	39.9524	113.046	152.288	73.232	70.5395	109.114	97.3279	82.0371	154.06	188.158	706.814	243.666	176.145	58.9299	103.88	189.205	154.472	115.151	141.665	141.313	199.929	482.12	339.048
CTDP1	1681.3	1916.76	1526.43	2081.43	1797.32	1804.37	2291.86	1756.04	1919.64	2252.16	2446.46	2023.77	2024.12	2188.22	2709.24	2097.31	2075.28	2220.38	1736.27	2083.22	1771.56	1669.94	1727.9	1982.02	1917.01	1793.08	2240.08	1936.25	2129.77	2618.92	2137.33	1919.16	1585.41	2649.23	2047.83	1392.03	2187.8	2193.94	1720.19	1840.49	2075.39	1520.7	1879.44	1659.99	2037	1938.1	1479.3	1508.91	1594.36
YBX3	9213.69	7607.4	9615.51	7631.26	7522.89	6837	18212.2	6670.64	6606.22	18648	10454.8	9338.67	14593.5	11471.4	27149.6	6676.15	8102.81	11706.1	10620	14432.7	10155	8716.93	8157.81	10737.6	20663.1	4779.35	10912.5	5787.94	9658.29	23269.4	10497.2	13734.6	11831.7	9339.85	10401.6	3415.76	9084.25	5953.58	6862.2	5414.36	7787.28	3458.55	5378.14	5911.82	8041.82	6082.86	10215.6	8634.18	7652.25
STYK1	44.6523	59.6326	125.646	68.3909	30.0565	76.5776	83.6874	43.3568	39.1189	92.0838	48.2949	72.8584	27.2509	66.1157	60.3938	79.216	59.2072	43.4041	165.64	31.4318	65.5705	80.0972	113.928	64.5053	298.536	1057.91	45.2045	49.6963	57.0569	59.0852	40.8163	66.8581	65.4928	263.399	52.6736	240.005	890.878	312.207	181.296	94.3488	36.9633	127.242	72.5853	209.396	107.378	140.237	203.173	133.264	206.905
WNK1	16918.3	18600.4	18784.2	18763.8	17955.2	14554.1	20608.4	16752.2	17806	20376.4	24027.2	15218.6	14048	19252.2	17791.2	17987.6	15643.5	17456.1	16062	13921.7	11805.5	12777.5	15031.4	16140.4	9115.17	14874.4	12815.4	17711.2	17376.3	16544.6	13809.1	12999.1	13605.8	19303.6	13938.6	12228.8	10926.2	11687.3	14663.8	16908.5	19155.6	8455.11	13358.2	10703.4	16942.2	16770.9	16986.4	22868.6	12154.6
CCAR1	3088.92	2480.57	2773.82	2593.11	2737.05	2118.43	3137.56	2476.73	2902.17	3001.94	2048.45	2920.52	2955.19	2728.07	3087.36	2244.86	2604.52	2562.02	3373.34	2786.71	2724.51	2937.32	2979.1	2894.6	2893.25	4532.71	2669.83	2587.39	2933.65	3122.91	2732.47	3054.24	3356.38	2103.8	3037.8	2730.31	2562.14	4788.59	2801.74	2761.14	2871.66	3092.19	4753.01	3266.69	3057.18	3429.68	3281.37	2937.4	3456.64
OGFR	4755.34	4358.16	4481.56	5163.75	4260.87	4738.82	3793.07	4221.94	4926.39	5038.28	5450	4446.85	3277.65	4232.07	3729.2	5400.73	5628.66	5068.45	3642.27	4572.7	3655.28	3976.22	4553.1	5400.17	4109.65	3090.88	5726.29	5349.37	5444.98	6422.81	4929.23	4171.03	3096.71	5823	4264	4468.93	3819.56	4266.98	3900.8	4388.37	4989.81	3654.71	4885.72	2708.9	4181.34	3254.98	4099.07	5267.27	3165.64
GNA15	964.442	970.808	2181.56	1946.47	1246.3	1545.49	2228.83	1207.14	1193.85	2281.93	1075.79	1810.02	1502.26	1499.16	3508.85	1435.83	3073.42	1769.15	1934.64	1886.47	1686.03	1449.99	1830.83	1859.21	3321.31	2342.34	2641.44	1597.1	1573.29	5880.76	1694.44	1884.02	575.137	3044.92	1527.66	1532.19	1696.69	918.477	1084.66	1542.84	1674.77	1913.79	1306.19	1757.08	2915.51	3264.63	2350.7	943.983	2118.13
CREB3L3	1.83362	5.33681	9.01827	7.51091	1.00265	0.0412158	2.34589	0	4.23701	0	0.0318659	1.93168	0	0	0.0196486	10.8995	4.39987	0	7.15399	0	0.0364201	0.0224686	0	5.37211	0.0147029	72.4288	0.0168741	5.42077	3.60037	16.2469	3.69567	2.15698	5.81328	76.6389	3.26494	1.89936	32.9069	7.59372	2.07565	1.60505	12.851	1.64791	8.3081	0	4.47962	2.19764	3.15279	11.5254	1.808
PIGV	768.967	817.656	675.716	634.442	857.583	850.959	676.126	655.564	839.905	608.372	989.099	775.306	647.279	696.147	439.563	906.064	981.741	805.904	758.722	815.062	724.178	843.503	835.468	727.898	740.284	873.678	833.203	998.446	794.81	475.705	857.906	580.761	680.943	1007.99	793.959	1521.66	969.372	420.677	841.558	737.668	869.604	885.055	1034.58	760.501	844.26	691.357	628.241	976.084	685.388
PTPRU	2912.03	3609.1	2547.66	4001.67	3817.05	2624.95	2719.33	2554.49	3587.82	2980.54	5712.04	2139.37	2192.16	3015.15	2888.26	3241.03	4617.3	3866.98	4778.3	3729.54	2705.65	3836.34	4190.33	3228.97	4200.48	4423.14	2123.48	3977.44	4130.87	1732.67	4089.91	2830.7	2751.15	3686.57	3021.01	9160.62	7041.56	1339.17	4580.63	3623.63	3078.75	5914.35	7614.16	5729.09	8042.84	7373.78	2513.18	11355.4	5190.5
SNRNP40	1273.55	1004.68	1289.55	1205.18	1006.86	1132.38	1102.41	1190.89	1026.92	1326.55	1352.08	1086.2	1065.65	1100.46	963.822	1276.41	1354.3	1138.86	1245.45	1192.35	1410.56	1298.36	1089.31	1269.36	1363.62	1285.57	1447.86	1080.71	1107.47	1203.86	1504.13	1434.6	1132.42	1472.78	1226.97	1664.68	1287.01	1622.83	1053.75	1037.8	1128.29	1339.2	1934.38	1420.12	1432.9	1181	1151.71	4788.21	1246.1
RIMBP2	3.68647	7.06471	12.5087	62.8131	86.1574	9.07402	84.6691	34.3403	33.8206	32.5413	2.24315	42.7471	18.1418	60.6726	19.0917	23.7617	0.0414878	12.1011	21.483	1.62775	59.9428	53.3753	5.99583	160.762	57.4154	186.178	49.3789	57.9049	80.7342	22.4998	1.82027	40.7591	21.9674	18.8243	8.28444	5.73828	44.9277	1472.74	42.2431	13.4012	66.8789	11.9629	8.31367	141.871	13.3374	8.67208	3.15309	50.5672	2.73178
COL11A1	18.5911	53.4913	3.53385	7.46291	36.0666	20.3079	59.4974	19.8569	60.1832	81.9541	8.82448	13.5881	24.2709	27.0662	29.6659	7.91655	0.0410398	33.0239	201.319	6.73183	39.9755	44.8302	3.99711	8.90866	103.28	31.0306	21.0322	5.37351	41.7012	0.0770333	30.6286	44.2099	11.8417	11.7904	14.9955	40.2999	460.554	799.513	241.049	20.1554	53.8949	73.8942	1222.2	41.855	50.955	6.50849	1985.11	2722.37	3129.81
QSER1	1739.03	1938.16	1609.01	1648.46	2054.79	1382.28	1588.28	2026.44	2018.94	1696.79	1164.6	2077.21	2047.75	1775.13	1496.56	1589.32	1569.07	1659.62	1804.77	1346.48	1701.57	1537.54	1605.98	1502.42	1080.68	2013.79	1443.67	1866.63	1597.77	1503.66	1340.69	1554.97	2258.79	1751.4	1489.96	2173.5	1209.1	1545.73	1928.26	1797.47	1928.67	1867.34	3299.63	1953.16	1709.52	1901.44	2245.02	1907.37	1892.73
MPC1	2730.5	2539.36	2682.29	2761.8	2629.86	2915.33	2425.96	2295.88	2541.91	2566.58	3067.14	2331.75	2443.23	2602.88	2984.62	3014.27	3638.83	3277.55	1906.01	2624.04	2625.66	2618.07	2583.36	2926.88	3229.45	1847.8	3512.47	2487.91	2631.85	2955.32	2587.63	2542.21	2153.04	2425.72	2438.93	2544.06	2326	2823.07	2264.06	2584.09	2306.65	2296.54	2745.05	3064.9	3370.29	2536.69	1947.47	2015.33	1986.02
ACAA1	2892.48	2913.45	2737.92	3004.52	3297.09	3596.32	2632.24	2598.8	2882.1	3135.9	4047.47	3166.33	2151.09	2714.5	3042.88	3255.89	4252.43	3464.45	3936.75	2836.95	2928.88	3056.91	3608.7	3327.59	2828.52	4083.97	3641.71	3284.67	2736.06	3891.23	4267.25	2991.48	2489.85	3584.66	3248.89	3934.2	2768.74	2412.84	2964.48	3052.04	2985.32	1810.54	2518.02	2521.4	2562.6	2228.24	2005.99	2003.85	2501.47
BCAT1	1082.67	2191.98	2821.39	3380.34	3178.87	738.47	3987.78	2960.53	4496.36	976.736	1537.45	2521.21	2445.52	1155.42	1682.98	1235.81	1722.49	4190.44	11487.1	3180.22	2185.84	2526.25	2210.59	2526.16	1195.54	2477.96	2683.48	1779.77	2322.8	3574.9	2507.78	1828.74	1136.93	3995.64	1404.49	3997.54	905.694	2148.22	1237.11	2366.52	1971.31	3235.79	6039.51	8640.77	6619.97	5242.68	2708.25	2063.59	9954.29
HDAC7	10247.1	11643.2	8294.56	8307.91	10223.9	9491.14	8903.9	9244.17	8313.49	12184.6	12776.2	8153.37	10399.1	9989.74	8971.88	9758.75	7656.85	8788.48	7935.89	9226.33	8598.9	8321.87	8464.61	10026.7	6309.62	6346.1	7020.77	9032.86	8906.99	6754.56	8696.95	7081.13	10289.9	7258.33	9116.85	6272.81	6108.92	5651.86	8781.17	10215.1	9865.2	5224.46	4463.82	7201.57	9081.85	7070.76	7695.04	8389.54	8611.12
LZTS1	814.585	411.452	720.587	769.4	455.842	532.457	1302.85	651.039	659.259	811.181	1228.13	838.459	2914.78	781.486	1350.35	566.41	507.35	653.738	1624.79	665.136	1046.24	806.138	420.732	745.825	310.126	353.792	515.911	326.43	365.189	1219.11	559.843	573.393	827.513	642.73	1314.27	356.153	469.971	841.412	506.792	628.94	758.434	153.025	243.631	279.815	343.052	331.14	1439.72	1341.09	1149.18
PRDM6	1439.31	1075.1	905.473	627.881	904.67	1223.48	492.805	959.424	698.346	498.593	1149.18	966.71	1031.52	721.668	455.449	889.23	565.416	555.488	384.483	921.538	889.651	786.919	724.539	715.344	392.608	847.515	439.213	832.02	397.818	240.868	861.618	519.81	1576.17	771.487	1130.79	798.745	762.725	411.164	958.968	1193.09	973.673	431.737	268.511	1561.06	501.262	852.018	425.036	561.56	690.027
SPAG4	95.8667	71.2075	203.746	114.32	155.287	66.4688	349.292	105.772	95.1019	74.391	59.2627	67.9966	177.281	62.9027	335.662	56.4384	101.929	212.184	283.22	150.75	81.1233	105.723	95.9387	146.118	145.134	297.686	79.8733	83.1655	115.079	162.857	130.906	74.313	126.366	160.482	105.438	198.704	386.154	1280.24	123.623	85.0635	128.844	342.276	951.627	176.062	160.498	130.546	927.506	548.919	542.221
NCKAP1	9588.88	10190.5	10785.7	8718.38	8873.38	10003.3	8514.29	7367.83	9939.41	9976.1	8816.53	7885.21	9371.44	10083	8627.67	9313.14	7341.29	8673.72	9552.51	9506.54	9149.79	7429.25	8582.54	8794.98	9343.81	10135.9	8032.59	7367	7772.31	8177.91	7967.17	9397.49	8797.56	7512.41	7482.69	7240.52	7924.83	7656.38	8372.25	9194.9	7793.73	7596.72	7405.82	8204.8	6984.05	6450.63	8906.92	6773.93	7291.06
MRPS35	1322.87	1319.09	1796.57	1729.05	1582.92	1445.31	1513.8	1469.39	1475.92	1768.42	1706.29	1690.52	1612.59	1438.57	1367.35	1623.98	2099.37	1636.15	2043.02	1406.1	1907.04	1692.35	1812.85	1572.34	2072.57	2257.36	2266.34	1512.09	1704.72	1850.62	1979.5	1767.5	1512.79	2465.51	1593.81	1303.7	2409.81	2845.92	1481.22	1214	1551.42	1088.87	2446.49	1859.87	1948.52	2165.68	2371.8	2174.93	1722.75
GUCY1B3	2447.53	1735.97	1808.25	1070.22	1574.91	1984.42	1179.2	1340.09	1241.38	1063.26	1627.33	1670.12	2770.54	1314.17	972.301	1554.67	1143.95	1104.07	1690.25	1717.86	1874.81	1338.94	1230.22	1615.39	957.472	966.774	1104.3	1409.9	877.249	789.659	1584.89	1597.38	2295	1063.04	1835.13	918.732	898.569	942.28	1424.56	1610.35	1424.95	1008.9	584.687	855.681	720.357	995.494	1291.56	1171.31	1022.56
SFSWAP	2809.63	2494.83	2320.63	2495.65	2688.97	2532.63	2333.14	2626.85	2792.29	3358.25	2954.19	2371.58	2339.02	2413.87	2596.99	2584.51	2566.16	2918.49	2032.8	2658.96	2305.79	2669.32	2442.45	2770	2195.79	2714.99	2350.42	2646.19	2522.19	2342.8	2634.06	2621.66	2697.34	1667.12	2765.64	1885.49	2187.83	3094.36	2507.14	2473.68	2436.46	3248.8	2504.54	2654.67	2007.15	2386.76	2169.42	2402.27	2371.24
TNK2	3587.92	3591.28	3139.95	3489.04	4401.13	2745.39	3316.34	3787.01	3507.53	3304.27	3312.78	3458.77	3056.33	3511.19	4138.01	3141.02	3145.8	3589.64	3645.33	3070.31	3157.68	3461.57	2769.24	3869.94	2172.82	3910.69	2720.27	3927.7	3730.28	3187.85	2595.05	2457.31	3630.79	3451.23	3830.15	4136.76	4390.95	5074.14	4183.03	3868.18	3594.64	5480.02	3374.29	3526.54	3155.66	4696.92	4035.7	4581.73	3945.3
MON2	2960.44	3718.66	3330.21	3408.45	3581.61	2549.54	3812.5	3651.38	3698.75	3428.93	2094.51	3437.39	3516.58	3187.42	4383.72	2862.76	2455.52	3640.94	3196.44	3267.07	2643.45	3278.99	2708.28	2999.48	2523.64	3784.83	2725.52	3096.56	3478.33	2960.07	2633.12	2793.7	3683.03	1670.66	2554.52	3034.65	2896.24	3211.42	3082.94	3359.79	3641.43	3684.01	3814.85	3400.91	2748.48	3723.02	5048.59	4007.56	3397.53
CDH3	108.883	155.812	277.25	413.273	276.511	239.814	1065.57	233.252	230.341	314.401	264.319	444	365.049	173.737	208.678	265.378	670.553	218.148	3454.99	168.554	356.563	543.473	298.81	430.271	945.936	1478.81	120.859	218.811	314.447	836.689	576.582	456.786	305.039	1150.89	221.864	5967.55	1546.79	1145.01	659.249	2052.06	381.921	412.787	6050.89	1727.56	3060.51	687.06	7939.08	6390.25	2518.09
GPBP1	4687.38	4495.33	4575.78	4225.64	4850.96	4725.31	4922.92	4003.11	5614.15	5223.41	3893.98	4001.87	4343.39	4615.66	5694.92	4019.35	3828.44	4327.72	3758.84	4804.37	4867.01	3969.82	4619.06	3848.4	5871.07	4490.11	4607.31	3934.91	4026.62	5652.14	4249.59	4749.61	4590.42	3338.89	4330.14	5601.76	4001.4	4255.55	4709.39	4194.42	4217.63	4825.37	4350.82	3596.97	3692.31	5193.06	4210.4	5457.92	3852.9
DGAT2	318.356	704.539	349.04	408.578	557.029	535.819	373.634	740.586	369.793	938.654	398.097	376.955	680.027	870.069	2056.7	400.05	311.227	611.151	546.038	627.677	569.8	329.958	441.719	334.326	1849.05	581.052	552.677	413.262	704.184	2186.55	331.43	721.028	347.163	903.786	262.903	1180.84	748.592	522.527	529.457	401.244	327.93	306.996	4309.18	789.063	1114.19	1192.82	655.898	1222.91	1180.56
ZNF112	236.462	262.764	200.999	253.973	198.367	212.755	195.981	245.958	240.879	183.245	172.189	253.58	224.38	261.581	125.002	212.899	156.717	177.32	211.667	243.583	282.095	225.295	219.86	240.245	256.85	255.818	212.247	245.991	205.714	140.515	271.121	175.85	283.013	161.596	190.945	195.842	232.582	200.83	248.237	251.272	182.122	199.543	143.068	301.751	206.913	128.371	151.948	215.882	141.309
CS	4335.47	4167.55	4324.51	4233.14	4294.93	3891.26	4139.13	4465.19	4240.74	4983.4	5829.42	4035.87	4815.03	4463.34	3945.27	4518.43	5409.52	5038.89	5182.2	4674.06	4135.08	4442.82	4361.22	4825.54	3591.78	4250.63	4955.09	5208.28	5005.43	5902.35	5988.63	5123.02	4324.78	8012.24	4731.31	4249.07	3237.54	7558.35	3920.38	4050.22	4682.65	7194.21	4896.1	3757.82	6466.2	5061.5	12402.2	6892.17	5220.96
LTK	1597.62	3113.43	595.851	326.103	448.829	705.758	215.514	244.098	716.296	386.96	570.241	250.649	155.801	570.941	718.089	496.104	301.366	412.904	116.582	781.012	700.841	616.087	1138.28	1678.3	540.863	661.165	1640.06	261.315	365.195	330.549	198.653	477.246	98.9782	252.949	302.293	771.878	604.498	261.727	619.056	763.072	202.2	134.103	80.8796	124.663	301.002	180.154	2386.39	85.0605	323.281
MRPS24	28.8446	30.2631	34.0905	20.5933	14.0268	11.3213	20.6825	16.2327	22.2062	106.186	38.3801	15.5317	32.677	24.659	141.74	12.8681	17.5731	21.6867	65.4258	42.6005	25.5775	39.5038	18.9877	19.6802	82.4312	6.4371	42.0232	16.2349	14.4553	98.8297	18.5393	29.7493	14.7321	8.27652	21.7664	59.5872	20.0943	27.6107	15.4593	10.0479	22.5611	14.5785	16.5954	10.4494	18.8281	10.8182	30.9454	60.6109	75.0069
ELMO2	2303.19	2382.6	2261.41	2231.37	2353.35	2391.93	1877.07	2228.07	2208.06	2444.72	2559.42	2288.03	2422.72	2349.29	1976.35	2752.85	3065.78	2448.15	2184.14	2424.75	2173.62	2304.16	2082.67	2490.31	1854.36	2244.22	2483.85	2502.4	2587.45	2153.97	2774.27	2531.03	2473.78	2734.76	2105.58	3426.35	1591.64	2429.02	2152.81	2547.85	2475.12	1987.74	2470.34	2509.98	2311.43	2059.99	2406.75	3542.5	2330.58
WAPL	4260.06	4776.8	4356.82	4373.72	4654.59	3859.74	4744.16	4103.49	4597.82	5669.94	3567.2	4364.27	4395.89	4409.92	5265.98	4280.78	4277.67	4841.54	4388.72	4287.38	4087.32	3731.72	3919.51	4276.91	3580.29	4848.91	4392.97	3867.98	4484.31	5747.73	3941.33	4581.37	4043.15	4161.84	3655.08	3548.25	3053.31	3346.57	3684.49	3958.37	4567.47	3510.21	2821.77	4229.95	3632.55	4090.82	3082.19	2913.31	2971.65
VMP1	6215.06	5928.44	8438.15	6472.94	5896.89	4818.79	9538.73	7239.43	5037.34	10381.7	3921.42	6107.25	9522.07	6673.86	16807.3	4748.16	6312.42	7229.68	11771.4	9619.83	9353.04	13540.9	6284	6811.14	20304.9	12597.6	10609.9	4506.45	7272.03	14601.8	5666.41	9160.83	8303.97	4092.85	8842.04	13891.6	8924.89	12887.6	6005.2	8063.41	3696.09	13290	15276	15362.6	14716	10066.9	17911.5	11472.8	18032.4
APPBP2	2712.81	2725.52	2950.62	2655.9	2981.51	2573.16	2752.53	2795.95	3100.78	2534.95	1971.68	2858.34	2933.91	2535.89	2609.7	2578.57	2173.91	2773.3	2778.23	3109.53	2586.79	2394.92	2688.29	2556.64	2269.92	2629.98	2596.28	2464.4	2471.43	2229.51	2386.15	2662.34	2888.95	1923.51	2598.92	2209.01	2223.28	2607.01	2462.85	2663.36	2727.4	2890.07	3413.68	3122.02	2107.85	2503.25	2073.47	2672.14	2356.45
POLD1	1060.35	1295.95	1225.82	1212.68	1367.53	1258.44	1220.43	1109.5	1437.87	1053.97	1340.03	1226.11	1205.63	1301.44	1113.16	1358.6	1816.66	1335.35	1347.7	1260.49	1268.41	1294.09	1189.24	1341.07	867.677	1395.09	1513	1617.94	1604.14	1272.31	1213.5	874.767	917.636	1642.5	1304.88	1631.08	950.527	2450.94	1025.94	1363.27	1607.9	1958.56	1602.66	1406.8	2043.63	1713.76	1680.1	1815.47	1929.7
SEZ6	10.227	21.4377	17.9794	15.9421	12.0224	11.2731	17.1531	9.92633	8.46838	13.9562	14.2506	10.6824	6.75535	11.9428	22.2056	7.91873	15.3282	17.4226	13.2932	4.18784	6.7058	2.16958	11.9923	5.33343	12.532	10.5926	4.22664	19.0284	12.6835	7.14563	16.7281	18.2251	8.83281	9.33832	10.0911	7.67979	16.353	8.57025	10.2925	17.8921	21.2719	9.48696	9.32394	1.88172	0.0376503	12.8979	4.00013	1.21594	10.1807
EIF4B	30404.2	24031.8	24346.2	21628.7	31889.9	28054.7	24033.6	28097.9	25841.6	20536.4	27915.7	21502.7	26801.4	20541.6	26698.5	27085.8	30914.4	35238.3	28226	24394	21625	25105.4	32409.4	21742.3	22996.7	28375.9	26916.8	27390.7	25794.8	20674.3	26151.2	23760.9	29040.5	30949.8	30788.6	25712.4	28618.8	23851.5	30113.5	22706.5	28588.7	29668.8	19807.2	30835.6	27382.9	25017.3	33408	25141.1	24475.4
SLC6A16	240.22	132.694	122.918	116.191	160.296	141.844	132.955	134.717	201.776	187.922	224.764	167.109	89.6643	159.484	106.991	144.573	143.55	123.421	42.9589	206.145	136.632	162.296	142.909	134.448	289.185	84.1029	108.237	140.164	149.529	112.175	154.121	179.264	191.558	103.047	173.443	114.241	238.315	87.5544	251.298	178.813	113.629	155.724	107.815	99.9343	96.2837	135.885	53.5595	48.3016	73.8726
GLTSCR1	1146	1419.78	1084.93	1217.37	1540.84	915.153	1398.02	1231.59	1189.61	1414.93	1463.92	1184.34	1140.22	1268.75	1410.75	1112.03	908.37	1525.78	1218.86	925.748	750.86	881.961	903.425	1154.61	549.227	1459.69	864.738	1146.74	1486.33	1128.33	949.805	948.634	1231.08	1457.51	1245.43	1175.07	1052.03	2259.64	1265.93	1323.67	1306.47	1261.81	1066.72	1366.83	1412.96	1677.08	1056.63	1492.79	1384.69
SPHK2	863.918	1053.69	782.5	1040.25	1050.94	879.12	736.874	937.7	918.092	748.84	1066.97	930.756	997.226	936.193	926.744	1137.78	1161.44	967.602	1348.72	993.913	878.566	1000.46	819.478	1186.01	833.214	947.207	1002.37	993.9	1161.87	791.982	827.25	893.093	817.421	1362.64	949.772	789.133	1501.76	3436.17	1069.19	1146.64	1012.29	565.915	1007.62	2016.03	858.638	957.73	893.267	999.04	1065.07
RPL18	38132.1	21048.9	22702.2	19724.4	24905	29385.2	25633.4	26437.6	21759.4	22191.3	44958.7	21555.1	25517.4	26380.6	28219.4	31151.7	35593.1	27333.1	30766	23397.6	26508.6	29424.4	30384.7	23625.7	36166.1	25662.5	33224.1	24437.9	25764.8	22995.8	32509.4	29044.7	22319.1	30071.8	39661.6	24549.8	30860.9	26890.6	27775.3	20681.3	25971.6	26500	21782.1	34531.6	44248.7	30456.3	22679.4	30198.3	35431
CA11	1063.18	713.434	764.57	818.14	789.458	931.987	758.617	641.096	773.35	522.783	1514.29	822.915	652.609	837.334	573.005	802.089	726.467	697.219	485.712	644.699	821.903	731.399	549.65	723.417	629.612	356.247	717.632	879.057	1054.95	626.746	640.628	715.588	605.482	643.941	1088.83	1249.96	562.079	2059.78	660.271	1120.5	758.376	812.806	1517.63	930.889	625.191	883.315	1421.71	633.918	1394.88
ISOC2	2150.52	1388.56	2115.15	2165.78	1639.03	1966.44	1629.54	1444.07	1443.17	1281.87	3042.97	1884.83	1699.3	1723.27	1412.89	1997.3	2473	1310.97	2205.6	1665.88	2085.86	1934.72	2089.67	2109.33	2186.38	2482.11	2145.52	1494.9	1535.23	2124.42	2070.48	1444.15	1507.01	2563.85	2320	1781.8	2745.12	3343.73	1681.05	1606.9	1760.18	2118.49	2958.59	2032.15	3331.56	2237.94	1728	3961.63	2528.27
U2AF2	8902.76	8386.78	8027.14	7964.91	8177.1	8291.25	8306.87	7742.2	7642.62	9698.89	10000.8	7842.47	7884.31	7889.21	8269.68	8940.81	8236.47	6870.63	8907.29	7449.7	7648.16	7552.04	7836.01	8012.39	7445.61	8019.11	8266.89	8184.56	8303.4	9365.19	8651.46	7901.87	7901.85	9205.21	9239.08	7169.47	8497.45	11547.4	7698.6	8103.07	8322.47	9138.98	7917.92	7270.1	8086.08	9102.68	9254.02	9524.09	8177.86
EPN1	10622.3	8385	7650.24	7927.42	8673.01	7704.81	7693.81	7919.44	7417.59	8002.08	16113.1	6481.3	7742.06	8336.59	7754.95	8625.92	9233.56	8418.13	8399.1	7270.84	7256.1	7497.58	7637.14	8625.56	6970.54	9534.37	7964.29	7779.4	9361.96	8901.37	8073.02	7517.37	7266.02	15403.9	10664.6	6093.28	9191.68	8419.74	7711.99	7800.39	7902.54	7144.29	6370.21	7608	8650.37	6553.09	8397.28	8600.87	7618.07
MED29	3913.75	3398.88	3375.97	3226.63	3304.1	3413.99	3073.42	3099.76	3337.44	3440.09	4659.36	3051.68	3437.44	3094.89	4190.97	4004.5	3681.59	3504.43	3394.82	3939.06	2863.36	3259.78	3272.92	3519.42	3141.76	3329.57	3829.79	4019.94	3687.68	3704.78	3857.78	3673.6	2996.47	3676.03	3347.67	4387.32	3488.98	4501.12	3466.12	3258.56	3316.53	3493	6384.7	3909.17	3462.16	3209.69	3174.84	3846.87	3744.83
AHRR	65.1402	86.3703	100.493	125.583	52.0971	73.2071	171.823	130.221	56.0187	71.6056	73.5035	549.059	60.754	103.645	75.2174	33.6626	105.199	110.402	73.63	112.415	87.7702	103.578	136.913	114.741	99.198	67.7658	201.696	99.4664	74.2845	54.3723	175.516	57.6792	62.6072	65.6349	51.8468	288.055	87.4309	121.826	98.8927	91.0067	196.74	47.235	20.7539	178.959	81.917	308.351	55.9939	58.6343	138.561
ZNF275	975.631	1169.48	1184.55	1082.41	1089.01	927.532	1556.14	1078.76	1099.81	1566.57	982.557	1066.77	1617.26	1163.48	1887.33	864.471	987.255	1281.46	1340.54	1204.28	820.827	1060.26	780.503	1114.27	725.678	1298.66	840.573	993.887	1148.26	1143.67	1164.29	1225.77	1116.43	1016.22	1128.98	1820.22	1041.43	2394.79	954.867	1204.76	976.772	2135.77	1369.42	1312.57	847.598	1375.12	1224.89	1639.79	1425.32
MTMR1	1520.24	1841.96	1551.57	2004.59	1660.07	1579.25	1756.72	1596.9	1671.36	2250.31	1706.29	1485.52	1360.02	1629.98	1786.75	1683.4	1796.97	1647.45	1719.9	1752.77	1400.59	1696.62	1687.93	1734.61	1640.31	1803.72	1692.68	1809.65	1866.05	2130.31	1791.01	1830.34	1493.92	1841.55	1603.03	2712.08	1833.66	2290.06	1625.43	1858.17	1758.58	3678.02	1824.51	1799.9	1788.08	2114.98	1649.16	2106.03	2014.66
GPC1	1734.36	2272.16	2026.29	2430.05	1840.4	2529.24	2679.17	1714.44	1820.34	2866.14	4887.36	1784.76	1621.67	2407.52	1964.69	1987.4	2047.9	1848.26	2358.99	2141.98	2416.84	2248.64	2023.71	3081.99	2647.88	1580.56	2081.44	1700.19	2457.85	2819.56	2156.82	2033.82	1479.48	2501.8	1438.85	1282.58	2207.93	1075.53	1875.73	2469.44	2152.71	1988.61	1622.37	2804.1	2353.47	2286.47	2505.11	1722.52	2421.11
ADCK1	240.168	266.294	335.62	325.19	225.417	242.041	315.144	330.952	308.5	190.676	310.343	388.629	384.163	305.402	216.082	323.806	360.486	289.481	351.751	349.193	370.96	338.471	359.771	407.002	235.983	426.661	434.976	348.183	339.856	372.943	298.957	233.202	216.461	471.777	377.718	314.879	216.144	932.839	217.353	300.102	352.982	319.938	768.126	314.093	377.319	376.412	341.349	468.5	625.407
HAGH	3998.47	3289.33	3323.92	3479.67	3164.84	4105.09	2809.86	2628.64	3552.96	3164.73	5476.29	2718.43	2249.97	3419.47	2754.81	3673.76	4710.44	3664.4	2839.58	3640.96	3636.37	3227.75	3661.67	3766.85	4225.54	3320.58	4415.02	3231.31	3792.81	3852.3	3446.46	3374.16	2292.45	3579.99	3686.09	2724.55	3598.74	3063.88	2985.09	3374.1	2958.7	2260.4	3573.32	5355.99	4369.41	2974.56	2976.54	3456.42	2755.5
RNF4	2693.25	3242.13	3203.68	3002.65	2764.1	2875.95	3656.66	3058.17	2581	3613.13	2688.84	2904	3291.41	2765.54	3225.05	3253.91	3443.82	2954.11	3669.87	2991.11	2856.69	3178.62	3005.09	2885.63	2843.14	3130.98	3063.84	3063.1	2976.24	4078.87	3244.06	3289.05	2981.92	3535.52	2909.63	2991.44	3101.71	3697.79	2778.05	2941.56	3144.88	3420.76	2624.8	3393.28	2590.27	3078.1	3387.02	3046.5	2626.17
CASP8	2116.06	2356.78	2267.7	2764.63	2452.53	2124.04	1807.17	2013.75	2385.54	2287.5	1778.68	2635.86	2142.77	2387.58	2702.89	2268.62	2611.08	2552.48	1415.2	2062.77	2427.95	2275.33	2656.31	2037.59	2339.87	1999.84	2873.65	2324.23	2481.42	2287.32	1860.63	2386.84	1936.71	2246.59	2330.91	2594.95	1542.05	1719.91	2198.13	1797.46	2577.51	2545.15	2341.79	2169.22	2428.7	2315.58	2581.54	1229.91	2307.5
LIMCH1	36540.2	32816.8	27324.6	26140.2	28320.3	31073.5	22071.8	24065.8	30308.4	27413.8	34881.1	21729	24234.9	25582.4	23163.1	23609.1	20121.7	27229.6	14506.7	31897.5	22719	22537.6	22217.9	25093.2	14402.6	6998.25	21143.2	25365.8	23197.3	16366.4	26058.4	26624.6	28329.1	18643.3	23240.6	8578.79	7614.34	8829.01	19922.2	25612	22412.7	8141.17	10061.7	13773	10377.6	12638.1	11689.2	9656.19	5248.65
ASUN	744.761	677.801	802.264	623.196	726.341	648.376	762.056	702.591	849.412	873.517	569.154	727.699	695.977	661.851	768.931	665.435	767.005	651.135	1074.68	711.14	867.436	722.859	820.478	689.347	888.541	856.513	845.81	627.613	870.947	767.168	672.198	763.618	776.705	807.823	731.138	672.965	930.409	1165.02	592.29	636.487	733.379	489.355	906.036	769.069	928.341	600.765	1300.56	1111.56	839.664
TM7SF3	2671.83	3563.65	4203.37	4411.2	4482.28	4225.55	4663.94	3866.57	3823.43	3226.12	2975.06	4242.82	4399.7	3871.62	3985.51	4157	5184.89	5916.12	5170.95	3882.83	4812.57	4537.84	4259.29	3999.91	3527.04	6172.96	3660.64	4853.77	4426.31	5206.01	3694.36	3060.03	3800.72	5545.62	3353.51	2843.58	4347.35	3952.87	3508.36	3000.55	4370.75	2724	2199.78	7006.46	5152.83	3954.95	4886.67	4912.5	4943.84
DLX3	39.0774	98.0388	28.6706	97.4997	56.1038	72.0217	11.5409	104.054	145.714	20.4295	44.9847	58.2918	15.0815	35.0111	18.0367	116.856	104.028	39.0784	67.4857	9.28509	28.9269	52.3292	71.9543	44.7952	14.6419	103.917	89.288	31.6131	28.9595	21.3363	126.348	57.3855	37.9009	39.9017	32.5719	612.55	21.3529	230.331	47.3995	255.447	32.934	449.081	474.758	161.794	253.391	392.548	116.144	634.808	149.615
SPA17	108.895	100.602	149.84	176.178	117.217	111.484	161.604	105.758	125.741	193.491	122.851	177.793	125.43	198.563	94.289	141.601	179.707	146.021	161.565	156.68	146.638	111.07	161.897	127.26	1106.52	150.336	116.646	209.818	175.808	162.906	245.131	221.777	288.697	216.598	120.538	362.91	1113.79	106.581	517.048	85.9158	111.136	324.319	99.536	185.597	227.939	227.572	108.019	114.897	90.4879
TSPAN32	350.956	626.199	273.667	460.145	505.934	553.774	433.171	439.463	510.276	492.112	220.456	476.068	230.38	410.669	581.446	520.864	406.52	565.992	316.992	291.229	288.814	487.947	429.727	304.758	184.83	795.353	661.916	263.136	346.18	309.276	470.734	425.288	215.06	154.607	397.882	360.016	147.668	173.211	265.757	449.444	529.664	317.392	136.855	202.725	273.311	375.309	151.103	148.199	342.714
WISP2	2036	2502.86	2448.98	1362.6	2862.28	1792	1591.75	4240.12	2359.13	1296.75	4935.61	1989.76	2041.6	1534.24	2117.21	1405.14	912.776	5152.94	512.302	4732.13	3360.88	3226.65	3612.7	2143.38	1891.95	482.906	2996.58	976.675	1406.52	1342	1959.98	1189.15	1363.36	1693.96	1181.77	940.815	2565.47	543.462	3093.2	995.668	1641	915.146	340.041	513.014	1504.79	429.292	738.783	124.102	854.434
DMRT3	3.69857	0	0	0	0.000666824	2.30612	2.35527	5.40309	4.24432	0	0.0343145	0	6.04276	2.30156	0.0211275	7.92189	1.13968	0	22.4567	0	2.26995	0.0241679	3.99724	0	75.8141	71.8785	0.0181381	3.5817	1.76923	0.0632374	3.68763	7.43881	3.08072	2.43079	3.26266	0	193.284	26.6555	121.406	0	6.3468	136.668	0.0153183	37.1472	13.3163	11.8953	6.40535	0.061597	0
ST3GAL6	674.924	856.832	708.909	1018.69	952.759	780.076	653.229	1040.8	1127.26	715.35	338.895	980.307	1069.51	781.462	607.961	974.389	979.57	722.413	1065.48	826.11	979.626	1077.33	1063.32	734.158	1052.47	2528.14	1021.28	921.546	1006.88	738.877	1010.17	848.741	1122.15	764.507	1109.77	1020.51	684.856	428.293	691.172	743.579	1010.69	1727.26	925.73	1053.68	1368.66	1984.39	585.976	1044.96	960.685
ATP2C2	1614.26	2702.38	1686.16	1910.85	2667.93	2225.34	1410.7	2201.84	2624.31	3572.22	2291.87	1861.51	1211.64	2169.05	1951.99	2915.25	3035.1	3007.19	3214.84	3015.86	1550.55	1949.68	2162.62	2546.79	4697.44	1426.08	1599.18	2067.38	3609.79	1448.22	2948.82	1987.63	1106.44	2512.29	1531.01	4795.39	5767.33	1344.9	2669.88	2450.09	1977.04	3658.28	2456.85	4034.87	3560.54	4267.61	1681.7	1454.95	3183.25
NGFR	207.593	87.2315	100.457	60.8801	63.1176	93.489	197.129	349.985	73.9845	167.426	275.233	110.745	952.396	239.228	259.484	67.3305	41.6919	85.1303	1496.85	68.0533	410.877	207.15	116.925	136.218	393.606	167.487	37.8542	101.243	183.953	108.667	163.388	140.834	371.419	234.184	335.865	255.359	1570.65	320.76	528.396	136.508	116.766	486.05	72.5861	145.608	329.726	469.119	302.358	110.316	132.058
CDON	709.375	691.153	921.617	1053.37	1046.93	566.226	921.332	743.277	634.964	1175.86	799.422	975.452	893.014	1283.98	850.486	623.844	730.86	925.88	640.113	1080.81	604.246	652.4	641.592	889.264	1116.15	396.292	878.386	1097.02	1737.44	731.786	628.551	942.889	769.498	525.7	565.304	345.591	1252.62	3464.79	1111.41	689.636	840.634	1353.95	317.233	2241.66	494.629	718.302	360.806	752.157	300.176
TAF2	1241.88	1456.28	1583.89	1296.08	1378.55	1205.56	1786.49	1372.64	1284.7	1651.21	890.462	1412.65	1764.78	1449.76	1987.97	1318	1215.17	1543.13	1556.3	1498.11	1500.54	1349.62	1395.11	1519.46	1501.44	2336.68	1454.17	1212.74	1373.92	1628.73	1297.06	1392.26	1637.55	1166.08	1251.26	1988.22	1491.25	3069.63	1415.3	1580.8	1376.55	1791.66	2886.01	1515.31	1442.86	1887.41	1785.76	2924.67	1604.52
HIPK2	8472.65	12844.8	7131.53	10957.3	9914.31	6619.74	12020.8	9744.23	10667.3	11524.1	9290.25	9012.23	9984.56	10949.9	11905.6	10250.9	7946.11	10418.6	7695.6	7201.84	6453.09	6704.27	6747.71	7617.94	4043.89	8019.1	6681.4	11025.2	12015.6	11030.5	4765.79	6055.11	6984.41	9912.22	6176.13	7156.05	5324.95	5239.72	8077.64	8108.18	10736.5	3671.02	6520.51	4773.43	5137.35	5596.44	5565.38	4300.48	4385.89
TNPO3	2979.99	2784.3	2847.4	2935.17	3197.9	2734.13	3048.19	2621.41	2924.36	3914.54	4211.94	3261.54	2469.84	2970.51	2873.42	3557.91	3602.69	2864.57	3237.34	3300.29	2600.13	2495.29	2585.35	3168.02	2441.16	2814.68	3069.09	3757.68	3272.6	3265.73	3086.22	2588.5	2595.8	4033.03	2783.17	2814.79	2411.02	2345.25	2868.69	2670.93	3208.57	2117.61	2749.2	1962.66	2569.24	2449.33	2430.3	3545.98	2141.2
RFXANK	2071.39	1747.54	1669.13	1739.36	1858.43	2002.45	1333.9	1462.16	1708.34	1322.81	2826.94	1436.94	1357.73	1551.82	1391.71	2029.98	2054.45	1586.59	1963.26	1689.73	1649.37	1691.28	2077.68	1824.26	1922.22	1328.84	1806.15	2024.9	1646.71	1357.32	1646.16	1580.86	1461.99	1878.99	2103.94	1101.13	1910.38	1577.14	1639.85	1615.36	1743.29	1748.64	1903.29	1739.94	2218.46	1631.81	1411.82	2567.59	2171.71
TMEM161A	1149.73	1064.37	938.65	911.842	1195.21	1223.53	991.254	995.568	899.081	931.175	1478.17	938.526	918.838	1035.87	920.395	1126.88	1386.06	1115.4	1191.25	1085.89	984.081	1144.6	1032.34	1082.89	810.248	1170.34	1334.38	1094.28	1224.4	853.36	1511.56	1048.37	1042.4	1442.3	1242.92	1126.1	1042.59	1353.48	1056.84	1036.98	1096.89	1285.04	2737.75	841.404	1586.66	1336.29	1079.39	2576.67	1239.65
LPAR2	516.672	570.928	349.046	497.62	594.097	401.882	517.984	551.584	593.747	816.79	560.362	462.458	425.907	629.197	950.005	467.388	438.31	552.908	482.641	377.246	434.306	653.445	522.667	490.334	695.377	1115.74	485.432	472.061	570.954	867.401	444.717	578.728	496.577	772.682	468.128	594.245	839.48	640.558	612.888	520.139	562.506	742.279	930.908	480.657	747.988	710.757	507.945	1023.12	900.648
CTSA	6283.95	7268.94	10705	8269.48	6716.4	6942.8	10745.4	9838.27	7867.65	6443.88	8044.55	7504.36	11531.8	7571.8	10010.9	8244.68	10602.1	11656.6	14264.3	7325.33	9715.13	9234.77	9649.86	10488.4	6350.34	14031.1	8753.36	11800.3	8808.2	26481.9	9338.52	8523.12	6392.15	28962.9	8912.39	17710.6	8928.43	11335.1	6042.28	8909.06	10664.6	6246.27	9285.26	7021.66	11499.5	7756.72	12032.2	19954.1	11181.9
SUGP2	2361.82	3364.16	2696.64	3183.53	3152.82	2687.98	2959.96	3617.92	3159.95	3824.3	2407.02	3573.42	2962.02	3272.76	3204.92	2647.88	2809.42	3460.11	3453.1	3485.11	2895.56	3412.45	2737.26	3329.38	2848.36	3260.11	3028.11	3059.48	3481.96	3524.19	2504.06	2451.72	2710.47	1596.9	2509.29	2135.09	2925.76	3479.84	3218.9	3368.23	3123.15	3564.44	3355.62	3163.9	2949.84	4091.86	3911.37	2726.11	3761.49
SLC12A2	2914.82	2582.99	3103.16	3876.1	2513.64	2864.7	2785.79	3846.7	2173.21	3631.73	2007.88	2726.2	4594.52	2961.72	2204.07	2983.57	2508.11	2843.7	2856.96	2726.22	6188.62	2155.76	2132.64	3030.86	4923	6774.6	2483.86	3659.09	2299.22	2616.63	3181.85	4808.41	3177.89	8487.42	3213.66	4035.95	5045.08	1702.77	5082.26	2673.43	2979.62	11013.4	3689.44	4430.78	3875.97	7629.38	5600.4	2921.36	3083.42
SNX24	1347.1	1158.78	1268.01	1221.11	1063.96	1138.01	1150.53	1048.91	950.851	1153.51	1778.62	1190.16	1055	1226.47	938.404	1391.28	1455.1	1357.09	1263.85	1251.97	1212.87	1122.19	1304.17	1411.9	1093.2	1005.21	1340.69	1410.83	1195.38	1399.76	1160.58	1111.26	946.652	1311.18	1375.28	1187.55	664.803	642.454	903.361	1049.64	1171.07	768.056	779.572	756.691	1137.46	842.345	1252.56	1160.95	768.525
EYA2	142.418	64.072	124.703	153.68	84.1563	85.6058	111.212	222.456	92.9961	88.3421	85.5792	109.776	165.786	111.565	102.76	79.2138	43.8826	273.901	89.9934	160.089	111.111	299.996	108.93	85.1127	961.429	958.691	130.302	160.96	111.437	184.132	148.538	148.11	240.899	2377.2	128.053	175.663	1580.69	3045.05	819.914	184.553	101.441	325.07	97.466	2615.8	231.308	148.88	63.2945	96.5436	294.637
CNN2	17709.7	11718	11482.1	11170.9	9071.75	9679.15	13390.2	11177.5	8735.03	12953.9	22822	9150.19	13853.3	10772	13676.5	13435.5	13553.9	10214.2	11089.4	14425.1	13035	10810.7	10714.2	13113.1	11233.7	9355.33	13158.9	10144.3	12408.9	15371.4	13987.4	15845.9	12151.1	15997.6	16870.9	9254.65	9157.49	7623.06	8369.16	8704.18	12125.9	9959.53	9816.02	13550.3	15336.7	13926.9	15772.9	9003.95	8111.34
ABCA7	2589.93	2036.11	1675.4	2162.02	2289.23	2292.87	1971.03	2575.32	2294.69	2714.5	3153.74	2319.12	1956.4	2645.98	2826.8	1587.34	2159.66	2571.61	1586.98	1618.16	2186.94	2239.03	1627.96	2243.79	1999.49	3043.59	2320.99	2209.37	2648.18	2821.92	1924.7	1769.52	1298.03	2122.52	2720.38	2609.35	2784.07	2263.4	2288.78	2909.57	2341.32	4424.65	3833.51	1913.17	2713.06	4823.07	5077.07	1682.33	3149.96
SNCAIP	276.49	102.373	165.977	96.494	210.389	269.032	207.454	267.649	127.861	294.891	176.585	262.319	539.523	265.532	270.083	241.615	203.83	130.345	574.641	187.322	373.161	269.073	239.847	163.112	537.683	205.085	246.922	330.106	275.505	154.686	300.824	295.816	706.304	111.31	601.45	85.4197	783.791	384.531	463.518	269.747	240.917	349.199	214.601	222.71	206.954	264.261	223.454	229.718	132.055
DDX20	777.335	871.084	804.937	1044	833.539	1000.67	893.846	930.467	1110.36	1095.85	751.183	1086.21	1058.1	990.432	746.701	1027.86	971.902	871.092	997.994	1010.95	1054.03	915.049	920.414	979.805	850.963	898.164	1004.47	912.501	927.123	967.808	974.886	965.134	1029.29	869.856	785.59	1397.81	706.106	1061.27	813.745	946.794	971.991	719.897	824.142	944.215	905.104	923.219	852.621	1136.82	954.217
BTBD1	4052.45	4289.58	4913.21	4507.73	4199.75	4497.94	5187.62	4272.58	4343.21	4816.88	3483.87	4615.9	4286.35	4405.93	4284.18	4118.38	4379.57	4891.97	3848.82	4166.44	4567.12	3852.37	4638.05	4028.59	5254	4243.28	5165.22	3688.91	3800.05	5196.58	4490.99	4431.64	4009.76	4379.6	3923.92	4560.13	5409.9	3729.19	4246.9	3662.42	4303.88	3466.33	3097.51	5944.21	3245.3	3875.13	3682.87	4008.78	3949.9
FAR2	709.36	798.911	1844.16	2952.12	1680.1	1181.91	1707.41	1104.07	1059.67	1097.69	486.933	1868.33	1061.83	1297.44	1033.73	1376.42	1945.95	1628.35	686.131	1275.81	1629.36	1178.78	1407.1	1058.67	1149.58	988.852	3034.35	906.148	1450.06	1292.38	1207.92	1081.75	891.523	1034.88	982.466	814.099	734.423	977.516	1169.1	756.241	1795.11	379.254	389.797	540.624	896.24	1118.4	553.468	514.5	735.283
BCAS1	108.883	37.349	73.527	213.64	99.1842	359.113	136.448	333.633	306.404	98.5673	719.337	668.44	213.625	338.045	52.9898	332.715	256.442	26.8804	96.1312	97.8587	114.464	358.78	210.865	256.333	1631.87	7620.76	688.198	341.817	431.37	102.785	472.576	597.155	379.049	5089.3	139.778	760.333	9150.72	153.214	1188.67	309.336	56.3119	611.513	243.633	416.88	289.952	560.858	107.999	134.438	96.0256
CHI3L2	430.998	877.308	1027.5	1407.62	918.697	1246.05	481.363	712.517	726.881	1740.55	701.848	971.559	680.708	793.407	1358.85	709.994	1605.18	837.17	446.859	3144.71	1176.21	1115.78	425.729	879.383	1154.8	440.419	798.545	820.238	872.731	5189.97	856.956	1284.86	395.112	1448.18	936.322	522.233	1062.69	512.049	378.045	1040.34	1061.4	1096.63	964.097	285.522	646.231	1396.69	1049.29	604.089	1005.92
SBNO2	4645.46	5727.13	6885.65	7588.16	6118.3	4993.25	16862.3	6598.31	4636.94	20358.8	5678.14	5492.24	9655.18	8642.01	26670.9	4842.24	8170.73	8766.75	14365.6	7935.16	4707.11	5717.7	4577.09	8491.98	11857	10802.8	8208.05	4247.79	6914.04	26019.2	5370.23	8171.83	5088.52	8631.57	5345.22	6555.06	7348.65	8297.91	5333.61	6860.32	6424.37	9588.84	9359.89	10322.6	8005.3	9918.03	15076.4	9490.79	8458.68
PMS1	772.687	917.418	829.18	864.058	875.617	812.702	691.029	849.088	1067.04	825.134	554.904	810.282	855.741	824.553	849.424	561.459	734.144	815.46	989.811	828.681	1084	932.123	861.452	858.786	849.914	1059.22	703.977	749.709	831.059	508.752	712.12	708.263	995.845	330.225	742.047	859.222	780.461	883.282	746.791	792.501	851.903	907.447	985.849	1111.75	778.967	822.915	859.147	543.204	825.817
HMG20B	4970.41	3543.17	3685.57	3332.53	3620.69	4213.15	3830.86	3404.5	3645.93	3099.61	5488.36	3348.98	3440.47	3772.75	3404.05	4181.75	4330.25	3513.12	3436.74	3250.87	4376.07	3654.83	3874.53	3694.23	4541.91	3273.16	4113.48	3692.54	3440.25	3177.24	3645.16	3440.75	3256.33	3832.9	5317.67	3826.66	4110.01	4807.61	3346.64	3541.01	3770.31	3785.45	6010.47	4004.36	4231.14	4210.54	9225.77	4929.69	3845.52
CALCRL	18299.9	40797.5	32536.7	21238.8	29575.6	30516.3	11464	12220.9	30931.7	21316	18598	19427.4	11724.1	29008.4	15202.7	38678.5	20820.7	12080.8	5857.09	22730.7	11668.9	16340.5	21945	21025.1	13729.1	3920.38	12892.1	20982.3	16324.9	7735.38	13723.7	18837.5	13447.6	7426.94	8217.26	3999.46	5537.5	3826.27	25461.7	27890.4	17611.6	1885.35	1171.43	4229.93	10052.2	4194.39	4035.59	2587.23	6075.42
TAF11	945.853	815.861	869.56	810.633	745.377	919.629	859.465	831.899	831.461	836.294	984.729	961.849	824.531	886.754	825.07	872.394	681.559	731.982	789.4	975.184	1119.55	1100.82	1010.36	986.984	1115.11	809.893	1024.43	808.494	792.985	771.912	804.969	1061.14	865.282	563.178	1065.37	679.686	674.237	2114.03	748.855	800.911	730.153	780.109	971.343	935.646	670.556	767.926	920.089	1088.6	760.217
ANKS1A	6269.07	6437.05	5628.41	6905.92	6932.8	5307.27	9256.78	6085.61	6637.9	6866.24	8680.52	6257.84	5539.91	6327	5719.3	6778.14	5788.66	6579.41	5363.2	5937.1	6760.72	7885.15	6329.97	6653.39	4026.13	3730.8	6762.29	5470.53	9025.75	5089.24	5749.99	5611.26	5237.96	5374.63	6236.52	2390.45	3648.36	4212.73	5592.13	4873.18	6146.45	2576.07	3354.6	3154.37	3575.01	3919.34	3514.63	4457.74	2571.67
AP3D1	6181.55	6459.31	5932.62	7754.99	7284.45	6255.04	7983.71	6296.29	6342.09	9282.14	8529.21	6310.31	7323.71	7430.69	7767.65	7712.92	9208.34	6801.09	8714.03	7164.39	6318.68	7131.35	6038.16	8029.43	6183.27	8910.8	6873.67	6495.19	8184.69	9248.33	7918.9	7393.42	6094.48	10327.9	6668.58	6784.5	6962.58	8811.89	6595.42	7522.16	7414.11	7798.86	12298.8	9512.63	8581.77	10000	16908.5	13601.7	7846.24
ZNF76	2113.28	2229.41	1809.12	1930.54	1857.43	1927.06	1677.68	1942.33	2085.5	2174.02	2536.38	1768.24	1627.78	1839.7	1894.79	2185.44	2125.68	2094.32	1929.52	2107.92	1922.6	2095.95	1845.83	2190.9	1886.73	2211.56	1998.43	2021.27	2311.95	1760.95	2001.77	1769.45	1567.99	1548.88	2112.31	1944.05	1872.6	3517.93	1724.31	1798.32	1848.87	2323.24	2079.52	2257.75	1709.52	1618.87	1818.26	2242.65	2007.28
SLC9A3R2	32434.7	25147.9	23270.2	20329.8	19306.6	22929.8	13319.2	14646.2	22347.8	20437.8	53505.4	18660.8	8733.89	25034.6	13125.8	24284.5	18221.7	21550	7703.78	19186	15381.8	19921.6	23915.8	25352.3	15270.2	8780.74	24048.3	15324.6	21740.9	18163.9	25567.2	24879.2	8661.28	16333.5	18143.2	9276.73	14084.4	5895.51	19957.2	16487	15070.1	5639.87	6786.95	12225.4	18677.1	8092.14	7455.17	11587.6	6699.86
NTHL1	1531.47	912.955	970.076	842.497	1101.03	1136.85	562.708	690.823	869.494	702.327	2165.62	955.047	552.153	984.857	462.866	1239.77	957.655	682.421	412.092	921.517	851.907	958.82	949.396	917.052	977.295	874.466	990.807	909.791	870.025	494.598	982.318	808.075	592.47	710.684	1037.7	1363.24	1320.02	2865.02	976.495	953.511	729.329	1049.34	1498.99	2863.18	1648.61	1004.12	851.779	2135.77	1846.59
UHRF1BP1	1681.3	2137.67	2022.71	2678.41	2589.78	1238.22	2058.1	2187.39	2345.39	1894.93	1437.65	2201.57	2001.3	1832.52	1801.59	1802.22	2031.46	2729	2391.71	2241.65	2060.32	1801.27	2060.69	2321.79	1257.13	2437.96	1637	2178.63	2253.03	2332.14	1721.36	1353.61	1218.18	2742.93	1546.08	2359.75	1269.32	3985.28	2016.84	1617.03	2074.55	1798.52	2920.23	2009.31	2331.33	2040.57	1943.43	2526.28	1695.04
GNAI3	4645.47	4514.91	6883	4483.36	4616.52	5196.95	5969.15	4524.86	5076.42	5816.91	3754.73	4912.23	6117.32	5034.32	9346.77	4761.04	4950.44	5555.29	5733.35	5470.39	5774.43	4346.73	4500.14	4715.27	6786.76	4333.16	6009.98	4111.25	4680.05	8360.73	4437.13	5143.46	4082.4	5123	4511.88	6813.32	4137.19	7471.75	3919.35	4675.84	4642.37	2816.9	4353.93	5080.88	4295.33	3825.52	4748.49	5746.16	5755.82
IPO5	4731.12	5102.79	4735.51	4800.12	5339.86	4781.61	5147.54	4978.81	4665.45	7131.39	5022.35	4686.82	5410.63	4936.23	5488.4	5375.97	5201.35	5364.03	4905.1	4976.4	5403.47	4711.88	5067.78	4710.79	5907.62	4678.07	4851.07	4105.83	4493.36	6449.98	4932.01	5603.72	5277.08	5137.07	4583.9	3249.67	4753.51	5102.66	5014.29	4555.26	4713.28	5230.48	6192.94	5808.08	5692.79	4639.8	5314.21	3609.2	3799.31
OAT	3955.64	3276.85	4757.08	3860.15	3847.1	3725.78	4249.12	3957.91	3899.49	3209.38	3367.62	3480.14	4043.71	3389.95	4300.06	3359.86	3304.69	3953.9	3859.05	4187.75	3981.8	4390.49	3619.7	3100.77	6279.3	4579.22	4063.05	3232.2	4005.79	4031.71	4244.95	4119.16	3609.08	3975.75	3698.59	13639.2	6962.51	24224.8	3910.08	3476.91	3592.15	4446.89	3583.7	3869.19	5261.27	4017.5	3900.69	7279.12	5261.61
WDR3	1090.14	1193.52	1182.74	1161.13	1280.36	1087.37	1511.47	1192.7	1306.88	1929.38	978.178	1127.98	1339.53	1149.9	1163.99	1240.76	1428.81	1117.12	1710.69	1159.12	1289.51	1265.26	1267.19	1171.63	1361.53	1794.79	1063.32	1183.81	1271.51	1398.59	1267.35	1236.95	1621.52	1365.08	1134	3150.84	1381.45	1560.02	1156.76	1418.07	1301.6	917.709	1750.9	1758.03	1458.34	1316.89	1597.18	2305.77	1692.29
PKN2	3960.3	4396.48	3979.02	4381.22	4251.85	3353.21	3255.62	4477.87	4703.46	3722.89	3067.16	4280.71	5091.97	3914.7	4547.89	3546.02	3243.33	4121.7	3359.03	4059.14	4030.67	3512.83	3611.7	3944.34	3064.5	4110.9	3220.4	4102.23	3673.17	2711.07	3302.54	3965.73	5108.56	2554.51	3711.22	4804.95	2686.11	5222.63	3631.95	3830.25	3971.87	2287.07	3142.08	3948.21	3139.06	2888.28	4160.08	3232.51	3489.89
WDR18	1908.47	1434	1502.21	1367.3	2263.18	1846	1346.51	1336.46	1124.12	1242.8	2336.79	1279.54	1964.82	1447.34	1861.95	1986.41	1989.81	1594.41	1727.06	1644.59	1839.29	1822.61	1996.73	2028.65	2250.07	1541.35	1834.52	1892.85	1344.91	2367.52	1896.86	1549.45	1747.93	2837.72	2248.01	1589.8	1807.67	2257.7	2190.92	1471.17	1621.57	1578.32	2917.11	1719	1690.7	1876.63	2860.4	2754.76	2631.75
TRAM2	2466.09	3668.78	3027.78	2871.45	2832.23	3412.85	4204.39	3162.16	2764.83	3886.63	2852.23	3475.29	5101.93	3818.24	3535.37	3167.75	2745.87	2914.99	3767.01	3485.96	2825.59	3071.85	2605.34	3523.02	1744.74	2951.98	2276.88	2868.65	2253	2515.14	2504.99	3093.13	4680.23	2382.4	3030.28	2383.74	2282.31	3768.24	2329.98	3747.65	3447.18	2316.33	2546.01	2533.77	2247.26	2212.06	2557.94	3676.86	2676.07
NTN1	920.714	745.488	1090.34	564.146	702.297	1181.86	1195.17	575.07	624.401	840.014	1597.66	1004.6	673.885	1003.2	754.112	770.399	626.778	560.697	220.88	703.456	861.901	948.143	966.385	796.918	2501.63	1115.61	691.372	609.515	873.652	645.647	959.105	1040.82	1130.83	1265.54	368.434	917.774	4399.97	550.124	3210.62	1047.1	783.332	798.157	1681.43	2597.6	2002.66	3253.77	362.416	325.056	356.521
GLP2R	31.625	14.191	251.654	11.2107	188.343	45.0529	61.8766	65.1137	16.9339	42.7738	30.7439	89.398	67.7286	83.0127	36.0309	21.7802	11.0106	85.2535	8.19288	17.8068	24.4875	51.2602	53.9656	8.90624	31.3413	16.2468	44.1414	21.657	58.9067	56.6616	48.2673	102.911	107.062	32.7905	10.8045	26.8724	70.6518	20.9234	66.9252	60.8204	54.9156	0.791859	62.1701	7.58851	37.6132	8.67006	13.729	33.3086	5.50049
MCM10	12.9972	17.7623	34.08	33.7245	14.0268	13.5723	59.5376	31.625	40.151	14.8488	13.2093	36.9153	56.3556	20.646	52.9448	39.6084	78.8128	26.0356	92.002	34.0373	144.104	32.0481	29.9807	60.9978	13.5964	44.9539	50.4264	23.4763	19.8967	75.4032	29.6906	29.8193	40.6808	100.754	26.7088	77.7422	21.3547	591.181	2.07459	46.2823	51.4743	72.1798	240.496	72.3146	98.5222	118.666	382.204	189.482	199.526
DGKA	1007.3	699.171	751.097	745.029	735.358	663.017	1331.51	944.041	686.729	680.002	757.755	766.56	858.778	714.477	1477.45	603.049	657.453	876.321	784.287	669.389	625.346	1111.49	752.521	790.647	848.871	1969.05	688.219	716.242	724.104	1059.83	882.04	747.075	725.961	860.525	1131.51	833.289	1481.76	1163.11	1197.95	945.073	1113.82	1653.21	1152.76	1313.53	1073.3	1544.43	1506.99	813.061	2035.96
ERBB3	4962	6549.29	4160.27	5460.82	6416.85	4699.45	2989.8	4394.64	7576.04	4908.03	6897.49	3182.83	3181.78	4905.91	4099.9	5832.47	6590.7	4911.06	8116.87	5589.62	3999.6	4815.46	5271.65	5669.09	5096.35	21546.4	3634.38	6970.01	5927.12	3135.97	6195.66	4411.46	4548.4	9013.22	4957.43	9960.29	7201.07	4223.17	4482.79	6670.61	4972.78	16649.8	7967.68	10583.4	8630.45	10504.7	15999	12539.5	6517.89
ANKRD44	1547.24	2701.51	2055.02	2232.31	2295.24	1927.06	2339.98	2644.96	2045.36	2424.26	1045.09	2461.95	2451.66	2200.18	3235.61	2163.66	1500.06	2140.39	1524.6	2026.16	2099.19	1948.61	2056.69	1843.96	1410.62	1659.85	1606.53	2187.68	2100.77	1772.75	1179.12	1414.61	2176.16	926.081	1571.26	1906.63	1285.8	1205.94	1861.29	2287.43	2385.81	1649.76	1058.43	2233.98	1546.84	2430.92	1454.14	1026.63	2077.52
KARS	5300.88	4368.84	5614.07	5573.28	5126.47	5413.06	4422.18	4435.34	4962.32	5147.12	5488.4	4475.02	4778.49	4706.56	4520.37	5406.67	5886.16	4753.71	5565.65	5415.03	5644.48	5041.81	5680.39	4837.18	6064.23	4919.99	5979.51	4836.57	5211.15	5724.16	5877.2	5272.84	4703.7	6968	5345.25	9014.67	6385.19	7626.89	5024.59	5989.4	4709.25	5059.31	8695.39	4880.04	6126.52	4522.25	7064.27	5259.3	7402.86
ADAT1	778.26	1224.71	1105.58	1156.45	1104.04	880.257	1239.89	1130.31	944.508	996.296	837.815	1244.58	1324.35	1161.09	1352.5	1053.61	1233.77	1091.92	1340.54	1090.15	954.096	1154.21	1096.3	1042.55	787.278	1588.03	1186.24	1058.11	1050.38	1115.34	779.89	808.177	1078.68	1026.75	998.321	2624.75	1721.41	1357.28	1055.81	1472.07	1046.91	1167.18	2647.57	1225	1407.43	1486.19	2111	1578.92	2613.33
PDIA5	1768.82	1950.62	1540.8	1844.33	1837.39	2256.83	1681.1	1429.6	1908.01	1565.61	1406.94	1500.09	1856.02	1707.33	1579.17	1536.84	1771.77	1152.74	2594.16	1754.46	1989.23	1641.11	2075.68	1608.2	1319.78	4294.22	1705.29	1544.65	1856.98	1150.8	1815.15	1688.07	1559.25	1826.33	1757.15	1714.6	1762.82	1700.88	1391.61	1590.05	1756.17	1852.71	4332.12	1810.38	1692.92	1667.41	1487.41	7089.34	2786.01
TBC1D22B	807.13	645.72	814.813	973.707	712.316	814.962	915.609	871.689	833.575	911.649	855.346	789.877	972.893	870.8	892.85	885.267	1044.21	891.965	983.678	1019.48	980.732	857.392	800.491	854.296	1219.52	1028.14	914.11	768.697	807.486	1255.72	828.182	1000.19	797.084	882.743	943.062	709.447	1076.8	1382.04	947.651	787.417	778.515	919.464	737.068	1188.84	847.579	832.635	1020.08	1224.09	727.882
NDUFB4	4766.52	3308.02	4339.78	3945.44	3519.5	4119.73	3298.02	2959.6	3418.79	3062.4	5567.31	3456.82	3054.79	3106.05	2654.19	3477.7	3982.91	3116.67	3739.41	3551.52	4397.18	3511.76	4107.39	3685.26	4805.02	3380.23	4909.9	3770.32	3514.57	3696.53	3831.78	4085.85	2902.14	4143.15	4638.36	3794.98	4118.3	5232.11	3435.23	3635.42	3056.18	4102.83	4025.31	4244.22	3079.34	3647.57	3832.42	4329.17	3364.23
SPEN	4750.67	6926.96	4698.71	6176.82	6776.51	3980.19	7713.23	6333.39	6370.6	8756.56	4974.11	5472.82	6407.89	6851.77	7473.2	5118.51	4615.16	6755.05	5262.99	4831.6	3236.57	4197.25	4044.43	5400.15	3254.53	5689.06	3892.85	6424.67	6514.4	7095.57	4047.17	4429.94	5460.02	6149.66	3961.6	7649.51	4980.17	5486.25	5923.81	6140.36	6883.06	5739.72	5095.13	6484.85	4757.82	5788.4	5245.96	6253.69	4642.71
MYLK	17132.5	17012.3	17101.6	10863.5	12487.1	15634.7	12770.3	14431	12987.4	10979.8	16920.2	10912.6	17872	13826.3	12654.5	14201.9	9292.76	12987.6	7928.74	18249.2	13202.7	14596.9	13119.7	12723.2	11701.4	7463.3	12022.1	10388.5	12638.2	7408.44	14601.1	14851.4	13655	12109.7	10035.6	7255.87	11854.1	5435.79	13628.6	13738.5	12243.6	4004.74	2692.19	9208.03	7623.59	7963.79	7170.69	9141.73	7477.66
ZC3H15	2361.83	2300.65	2921.9	2519.08	2511.64	2523.63	2855.66	2189.17	2709.89	3370.34	1706.32	2323.01	2737.64	2481.66	3363.78	2014.13	2404.01	2533.34	2943.88	2659.81	2954.41	2392.79	2319.52	2576.36	3805.8	3036.19	3288.67	2217.5	2607.38	3455.71	2402.86	2910.02	2441.89	2398.81	2580.48	2564.22	2403.93	3795.84	2234.19	2319.34	2341.3	2530.5	3214.64	3181.03	2683.2	2729.74	2737.57	2284.03	2585.53
MAP2K4	1413.18	1590.77	1551.57	1632.52	1536.84	1650.16	1812.87	1668.34	1669.25	2269.85	1333.47	1786.71	1755.61	1743.23	1971.03	1530.9	1586.6	1512.69	1569.59	1659.07	1774.87	1746.8	1500.05	1640.48	2162.36	1737.52	1705.29	1302.27	1454.57	2347.45	1863.43	2018.82	1514.24	1545.35	1451.45	1797.17	1353.12	1604.75	1477.1	1509.13	1390.26	1805.43	1445.09	1960.78	1483.79	1570.33	1249.25	1663.92	1525.08
TMEM206	368.639	487.199	620.11	530.43	420.777	607.815	551.192	548.882	460.636	313.471	251.161	463.432	587.254	496.798	399.306	507.989	554.429	667.708	778.139	442.852	629.739	510.377	538.657	410.546	361.278	658.764	639.866	491.969	364.299	566.509	365.795	430.939	403.692	434.388	640.716	425.278	388.518	1057.49	383.19	488.957	766.497	416.257	758.823	311.227	542.192	509.08	473.008	737.21	598.573
SNAP91	16.829	14.3314	1.74733	15.046	8.01477	8.99009	15.9096	5.40348	0.0201557	7.43933	8.76355	5.82391	10.7249	0	14.7816	1.97605	4.41244	6.94351	0.0080831	5.07174	0.0391693	6.41575	1.99844	7.16466	12.5068	3.19628	16.7592	1.7646	3.59036	4.77151	12.1036	3.97751	3.07984	4.7747	3.26222	9.58053	16.5917	49.531	18.5497	9.1955	11.193	17.1566	3.12959	1.87859	2.26869	8.6679	8.03121	2.37438	5.50122
SLK	8307.87	9282.83	8507.25	8726.82	9191.97	7819.62	9362.26	6765.6	9375.24	14150.2	7208.95	8704.25	8377.23	9762.47	11106	7309.9	6779.19	8499.85	6707.83	8689.77	7757.01	6121.29	6728.72	8413.1	9339.63	7512.38	7835.05	7101.11	6724.63	11539.2	7012.7	10678.5	7682.65	5910.88	6024.53	6904.52	4682.67	3569.28	7057.9	7389.84	6903.98	6112.14	4658.7	9014.83	5703.85	7823.55	5419.89	4151.2	6018.16
CYB5R4	1506.28	1668.26	2159.13	2145.16	1734.2	1752.59	1819.75	1869.99	1865.76	1600.03	1219.43	1995.59	1707.67	1673.03	2766.42	1677.45	1952.56	2008.25	2491.91	1748.5	2007	1626.16	1640.96	1704.12	1911.78	1270.81	2470.18	1840.39	1672.99	2832.5	1460.46	1623.4	1090.43	2258.24	1433.03	1277.79	1481.8	1708.5	1264.91	1572.37	1923.06	1266.95	1804.8	1281.15	1604.39	1552	1179.35	1032.39	1456.72
COL17A1	27.8897	26.6592	84.2988	67.44	31.0584	56.3522	565.939	54.2003	39.1223	48.3334	50.4982	124.347	125.398	58.0986	145.126	51.4865	63.6055	47.7404	331.298	47.6093	133.332	60.8989	67.9564	128.143	530.372	5185.76	25.2452	39.7375	105.081	129.909	116.023	70.7291	67.0343	3342.31	47.6593	1672.35	2259.87	200.806	748.863	875.06	138.522	493.64	246.743	437.816	382.899	1074.24	1669.48	2428.7	2997.54
GSTO2	417.064	497.018	288.028	430.152	400.74	441.243	323.192	314.653	455.345	447.453	486.876	339.069	215.162	318.927	385.531	426.79	478.821	311.198	344.599	386.645	315.465	375.851	519.669	476.015	656.73	832.968	276.351	442.235	525.661	288.038	550.596	314.537	444.243	470.661	381.031	48.939	612.784	136.082	473.83	516.797	282.001	769.856	376.316	808.12	416.065	196.332	407.978	361.774	289.096
SEC61A2	166.623	215.54	185.74	201.481	181.335	178.999	209.72	229.678	231.371	265.133	188.63	258.439	290.634	197.739	220.302	162.395	161.097	226.033	219.846	246.998	203.268	270.124	186.881	242.043	183.774	297.539	209.094	204.377	154.04	221.894	128.1	229.269	264.159	106.614	180.035	168.954	186.589	469.292	232.793	209.069	165.974	246.861	171.057	285.558	226.833	202.774	315.431	213.604	312.245
PRKCQ	458.948	538.86	482.777	684.135	642.186	616.83	532.874	446.678	567.335	680.959	379.449	539.216	387.104	462.482	810.212	654.545	736.296	628.563	456.055	720.559	304.373	554.155	564.641	714.484	383.205	276.157	549.518	588.745	505.695	449.713	557.076	803.931	328.27	419.123	503.389	262.073	344.802	368.343	391.423	473.832	511.012	506.638	217.712	282.678	345.242	474.544	317.763	120.655	360.244
TLE2	4007.78	3582.36	3672.11	3280.98	3726.88	3922.75	3703.67	4344.04	3443.09	4017.79	6150.68	3173.12	5991.15	3652.33	4300.06	4300.58	3953.33	3437.48	3213.83	3704.83	5624.45	3248.04	3217.95	4356.71	2700.1	2810.56	2868.42	3266.57	3592.51	3375.52	2915.37	3313.21	3748.42	3135.15	5246.53	2754.31	2193.79	1184.98	2927.41	3726.53	3551.92	2798.87	4863.94	5397.87	3027.31	3891.28	9594.14	3086.68	2864.5
ASB1	1753.92	2190.23	1448.36	1853.7	1813.35	1930.42	1831.21	2183.78	1518.18	1868.89	2161.35	1765.33	2152.72	1998.43	1630.01	2248.82	1617.29	1771.77	1424.4	1751.06	1961.46	2004.12	1727.9	1734.6	1617.35	1222.59	1493.05	1721.91	1719.22	1456.46	1514.32	1693.61	1817.6	1801.68	1716.17	1286.43	1614	1716.12	1684.13	1701.4	1723.19	1826.1	1446.13	1956.03	1362.08	1790.33	1486.65	1084.05	1365.28
FAM107B	7673.89	7888.88	8743.27	7669.7	7918.62	8462.34	8289.68	7031.45	7727.14	10450.5	12705	6626.06	7051.36	8119.68	11163.2	8823.97	8649.55	7993	5471.59	8893.33	8224.6	7114.27	6709.73	6782.45	12066.9	7863.82	10399.8	6973.59	7416.14	10384.9	7205.82	9593.38	6651.96	7758.24	7558.92	4501.55	10051.2	4675.29	8191.99	7302.12	6668.58	5255.4	5926.52	11358.2	8850.63	8724.12	5466.19	5173.2	7454.57
ME1	765.229	832.775	1341.62	1091.79	653.207	898.259	979.788	999.19	1132.55	765.583	1083.43	850.113	1066.45	739.18	785.889	816.94	873.301	880.65	2106.4	1271.59	1386.1	987.654	1006.36	894.63	894.817	1481.79	1049.65	1157.6	874.549	1536.6	728.825	933.775	605.553	3724.97	803.978	1608.04	640.028	1396.3	649.977	947.586	1032.38	920.29	2222.56	1029.87	1224.89	1487.29	1091.56	1343.56	904.309
TBC1D1	3986.36	4066.02	4866.56	3774.87	3362.21	4289.7	4786.54	3805.09	4164.66	4306.17	3490.44	3737.61	4667.49	3810.23	4323.36	4234.24	4062.9	4215.59	3532.86	3436.54	3671.93	3725.3	3620.7	3719.32	3829.83	2656.91	4426.58	3456.49	3745.68	5496.32	3209.7	3817.86	2696.02	4295.27	4094.83	2157.17	3643.61	3723.49	3462	3659.08	4116.13	1692.69	1641.03	2034.05	2952.07	2645.62	2449.8	2743.35	3066.81
CDK13	2596.43	3495.99	2916.51	2857.39	3467.4	2945.73	3104.34	2702.8	3197.98	3387.08	2289.69	3133.29	3251.1	3044.68	3350.02	3001.4	2693.27	2872.39	3022.61	2844.62	2534.6	3047.29	2892.16	2814.81	2567.49	3366.37	2539.54	2811.68	3137.56	2938.81	3258.92	2784.41	3443.49	2634.12	2652.5	3973.56	2885.64	3437	3266.29	3335.31	3161.01	2983.8	3266.48	4137.63	2632.31	3393.02	3287.05	4180.98	3586.88
MTHFD2	555.751	516.551	1189.04	800.314	829.532	757.577	2339.85	916.891	930.775	1614.02	480.351	948.241	1085.45	599.599	1990.06	795.154	1467.14	1286.68	1512.32	1102.07	1147.34	892.636	897.429	833.661	1421.04	1153.17	1497.23	690.904	773.939	3274.81	774.318	956	525.742	1248.03	904.481	1334.42	1021.38	2973.48	1032.12	933.242	1149.24	776.633	2228.79	956.57	1441.76	1405.33	1717.46	2327.62	3090.86
SLC9A7	362.11	724.118	456.729	1294.25	746.378	554.967	1169.95	1286.8	681.444	575.809	413.455	786.965	722.597	596.439	674.677	543.635	1274.27	905.022	682.035	705.171	663.101	798.665	650.586	744.032	437.504	2630.43	713.432	875.433	763.989	847.417	716.765	641.743	631.62	1537.15	761.26	3298.69	604.61	1182.14	558.303	810.151	1147.64	1943.92	1221.18	1221.19	1254.76	1021.39	1238.69	2362.03	1473.35
FOXJ2	2070.45	2469.02	2051.43	2011.14	1974.65	1924.81	2027.17	2323.93	2144.67	2163.78	2080.22	1892.6	2633.48	2275.95	2410.57	1931.94	1904.36	2362.97	2043.02	2000.6	1736.02	1814.08	1611.97	2075.26	1204.93	2128.18	1733.66	2045.68	2143.37	1802.26	1894.06	1752.83	1988.92	2157.58	1947.32	1529.32	1818.27	954.648	1717.1	1961.91	2097.97	1458.76	1720.84	1883.68	2022.62	1603.77	2015.81	2224.26	1738.47
YBX1	36760.8	29754.6	40604.2	31750	33307.5	36726.4	35365.8	33254.8	27042.9	32680	35229.9	35624.4	34108.4	30740.3	35122.8	34573	46372.7	43786	31195.5	32356.5	38626.1	32453.5	38456.5	34416.2	40363.5	25734.4	51706.9	32709.3	30966.9	51624.8	36127.6	39242.6	28377.2	63005.7	43166	29830	23278.6	36191.8	30106.3	25093.3	34472.3	19839.1	21339.4	25263.6	30546.3	25300.9	23491.4	68412.8	33089.3
PDE4A	2349.73	2396.85	2396.91	2740.25	2915.38	2120.68	2885.45	2255.19	2520.78	2661.47	2788.61	2400.73	2434.11	2862.87	3646.56	2744.93	2959.51	3060.21	2019.51	2330.2	1703.82	2370.36	2364.5	2668.7	1533.83	2674.94	3074.33	2885.85	2874.75	4160.25	2249.66	1952.57	1862.72	3493.29	2500.95	2078.45	1961.16	990.814	2374.26	2418.03	2648.45	2404.95	2257.82	2248.23	2267.16	3234.44	2253.14	2634.21	2004.5
PPP2R5A	9014.47	9150.12	8103.42	9021.09	11856.9	11036.6	6492.89	7119.16	9565.41	8168.6	8870.26	8357.4	6744.04	7799.09	7878.86	9603.28	10786.2	8958.89	9138.39	7959.01	9180.89	6789.69	10045.6	8946.48	6741.88	5924.39	7107.98	10636.3	8241.77	6333.22	9875.18	8291.97	9450.79	8653.8	7769.17	10360.6	4826.73	2991.53	8011.73	8604.75	8847.19	6763.26	5966.95	4005.3	6260.41	7674.73	4789.1	5506.2	5926.7
CTNNA2	0	0	0	0	10.0156	0.0332284	0.0383833	0	0.0152419	7.50866	0.0257619	7.80156	4.6354	3.18858	2.12986	3.96234	0.0255361	1.70447	4.08633	1.66355	2.24109	0.0182158	1.99859	0	12.4333	0	0.0137031	0	24.0661	0.0469537	0	3.64699	0.109469	18.8202	0	0	44.9076	36.1523	6.19693	3.28898	4.72971	187.848	2.09198	1.87924	13.3364	2.19715	0	0.0649101	0
ELAVL1	3298.38	2935.72	3340.08	2883.63	3068.67	2960.37	3475.61	3007.53	2631.72	3662.43	3840.22	2739.81	3205.44	3011.17	2939.09	3352.93	3065.81	3208.85	3135.09	2917.01	3348.71	3101.75	3051.06	3221.8	3227.37	2765.63	3581.82	2833.38	3348.73	3571.4	3427.9	3610.68	3646.74	4131.41	3649.2	2862.79	3226.88	4092.79	3278.66	2879.15	3100.52	3241.83	4161.11	3510.35	3454.42	3664.81	3158.59	4110.97	3117.6
TIE1	10943.4	12512.5	9228.75	7993.96	11539.3	9058.91	9157.15	7800.97	6872.45	9252.35	12932	8494.39	11736.4	11224.2	7683.99	11027.2	7970.22	5133.6	8592.36	7090.27	10775.8	7565.92	8474.61	10727.7	4806.09	1704.74	7133.19	12488.5	9097.31	6296.63	9709.91	7295.57	11436.7	4914.56	12540.3	1792.35	3447.64	2276.72	9704.05	7846.1	12690.5	1020.05	902.941	1982.65	4663.75	2230.4	5869.49	4298.12	3135.16
DIP2B	3074.02	3889.68	2940.73	3641.8	3580.61	2832.06	3693.33	3598.02	2970.84	3204.74	2920.21	3362.58	3626.12	3601.32	4172.95	3433.14	3214.83	3452.28	3651.47	3037.1	2525.72	3099.62	2957.12	3079.26	1933.72	4253.15	2840.04	3273.82	3350.54	3325.93	2389.85	2586.69	3456.59	2998.17	2958.23	2876.24	2509.01	3588.34	2986.12	3243.43	3539.85	2452.23	2110.63	2708.91	3014.02	2828.96	2430.3	3671.13	2734.26
SMARCD1	2619.72	2412.89	2175.26	2248.24	2077.84	2319.9	2545.12	2392.64	2167.92	2882.88	2909.22	2249.17	2698.86	2754.42	2598.04	2817.21	2383.18	2389.9	2277.19	2271.43	2394.64	2063.93	2036.7	2680.36	1941.03	1856.81	2438.67	2337.79	2339.12	2544.6	2696.27	2490.38	2475.24	2776.91	2839.31	1729.95	1860.83	3612.14	2136.33	2246.84	2596.83	2173.54	2376	2336.74	2148.78	2234.7	1945.85	3131.43	2504.25
KDM4A	2849.66	3166.43	2660.75	2702.76	2707	2937.85	2356.07	2572.58	2742.64	2513.55	3646.12	2453.19	2699.59	2790.28	2409.53	2952.87	3314.52	2638.53	3962.31	2773.93	2553.47	2607.4	2815.21	3060.45	2373.29	3402.34	2284.23	3408.59	3257.2	2150.45	2943.24	2394.38	3039.94	3460.59	2781.49	3297.69	3146.56	3767.28	2825.43	2942.42	3224.69	2836.72	2966.89	3478.95	3161.19	2979.95	2956.22	13262.5	3254.33
NFYC	2377.66	2338.06	2319.74	2232.3	2382.4	2305.26	1993.96	2190.08	2252.43	2500.53	3153.75	2513.44	2183.84	2243.22	2463.54	2530.04	2765.57	2216.88	2248.56	2401.75	2343.55	2394.92	2402.47	2677.67	2045.44	2274.46	2625.69	2704.98	2721.58	2300.31	2864.33	2593.89	2531.85	2890.47	2378.62	3579.95	2133.56	2587.97	2229.04	2192.87	2149.47	2772.21	4096.82	2899.28	2636.73	2446.09	1710.11	12035	2943.03
ZMYND12	68.8617	83.6876	87.9112	88.0728	96.1781	114.832	72.2531	80.4437	75.0326	61.365	89.9496	118.527	57.6969	110.011	87.9267	113.875	128.205	74.7146	191.205	80.0044	75.5694	85.4408	181.884	93.1998	732.736	138.12	81.9724	121.175	149.545	103.902	219.163	122.112	146.597	156.932	61.0503	366.748	1031.27	65.6483	322.398	80.8545	107.908	244.274	176.24	79.9283	140.563	161.803	124.281	754.107	215.22
SLC9A3	122.878	77.4479	55.5878	85.2596	103.191	101.337	135.226	262.322	255.62	130.231	107.486	74.799	117.105	133.164	150.392	92.0886	71.2615	90.373	137.02	126.035	72.2403	148.41	111.929	190.979	133.649	342.731	93.5273	103.075	157.705	134.555	72.3907	109.256	135.03	3087.48	115.5	302.407	163.01	95.1554	130.831	257.121	168.371	248.554	257.095	257.939	88.5756	128.382	508.14	238.881	337.171
NGEF	16.7198	5.28418	3.53491	13.0852	13.0251	15.827	25.2804	7.18056	12.7093	8.33321	24.172	35.9374	19.6517	40.6065	22.2715	35.6447	15.3924	15.5771	0.00990807	17.8059	34.4739	19.2547	36.9762	10.6991	540.431	649.466	15.7881	20.7511	48.9202	11.903	42.6889	64.6916	52.3346	455.383	17.502	77.7393	921.866	79.9247	128.772	17.6215	13.6	63.5698	291.308	99.9155	191.467	63.6777	644.685	422.574	512.696
ASPM	65.1337	56.0575	137.287	194.943	66.123	63.0959	178.749	159.148	213.391	91.1391	57.0717	205.98	278.592	88.4388	200.161	65.3507	151.214	142.563	362.968	69.7691	405.209	147.352	71.9539	148.802	56.405	303.385	48.3593	160.074	95.1266	193.522	61.2432	181.076	101.769	219.008	109.626	329.273	101.643	1457.3	47.3991	192.988	216.707	282.923	765.036	266.491	258.964	392.605	1179.6	416.879	818.462
CD84	891.822	1979.99	2218.33	2214.5	1591.94	1142.55	4361.32	5231.2	2125.66	1061.39	365.217	1796.41	4628.86	1079.66	3638.08	1744.79	2046.81	4334.78	8419.49	1361.79	2299.12	2857.23	1489.05	1350.89	643.201	3336.17	1492.01	3801.12	1661.19	6060.27	1258.04	1170.69	1017.89	5495.19	1919.61	3302.49	1290.59	3382.74	1413.24	2905.31	3864.64	2893.48	3065.37	1928.39	3464.36	4318.37	3295.17	3013.2	5219.16
ELOVL1	4557.96	5525.86	6041.23	5544.23	5273.74	6323.67	5197.97	4894.7	5075.36	5319.21	6194.59	4986.06	4694.04	6049.5	4445.18	6979.16	7840.88	5452.69	6276.31	5243.82	6185.38	5704.87	5775.32	6424.8	5231.04	6740.1	6568.95	5510.33	5364.3	7036.56	5987.68	5359.79	4234.84	7620.06	4981.74	7476.69	4147.83	5202.6	4043.99	5317.43	5482.2	4827.92	5173.92	4603.05	6364.41	4516.85	4985.01	23529.6	5241.28
SPI1	9232.31	8384.09	10434.8	12554.2	10636.6	8015.5	9310.73	10527.3	7554.94	10897	11531.7	12140.7	7616.51	10205.8	13851.3	11636.2	18693.9	11947.8	6275.3	8438.49	8256.83	9178.19	10983	10668.5	9793.83	5467.5	21490.9	11895.2	13318.8	24025.9	10782.3	11717.7	5005.8	23291.8	13042.5	5139.97	3101.76	4711.46	7308.2	6496.95	12763.5	3697.68	2773.05	3082.97	10456.1	9209.44	4761.47	3540.31	6374.72
ZNRD1	711.243	725.904	679.307	616.636	730.349	778.929	811.323	740.573	652.919	669.774	849.849	799.597	749.998	707.315	846.242	762.479	711.13	738.084	735.204	826.137	981.822	707.912	738.53	671.416	881.233	786.211	1047.53	677.358	677.887	787.229	774.337	722.987	688.196	688.432	779.717	705.606	688.407	1351.58	625.252	561.44	680.172	999.465	959.941	659.603	756.856	836.949	953.414	1359.57	893.241
MPPED2	40.0104	76.6278	76.3039	29.9625	32.0599	56.2894	16.1218	69.6409	42.2748	49.2915	96.4413	44.6852	44.0594	41.4102	27.5638	102.991	56.9828	46.048	32.7299	61.3225	37.7997	83.2577	59.9618	51.9796	118.985	59.6577	30.4913	80.5199	81.5978	44.8917	38.0437	68.3075	26.3383	48.0295	21.6953	26.8628	175.53	37.1048	108.13	50.5638	23.279	27.4623	6.24017	30.4389	42.074	25.9205	21.853	52.8386	61.893
CLDN18	31610.7	36186.3	33672.8	34243.8	41141	28965.3	34577.4	17762.2	46056.4	50469.4	71074.9	24757.4	22486.8	47694.3	19586.5	46831.1	47423.5	54402	26728	30618.2	28022.5	29112.6	35875.2	56823.7	18661.5	70231.3	37471	41338.9	28999.4	36232.2	32747	27575.1	26312.8	61051.2	27898.4	3707.6	24540.5	3655.89	18122.7	16969.2	37408.9	94.5484	3895.74	7113.03	13496.7	2954.1	10217.2	2094.61	15533.6
ZBTB11	2042.52	2121.63	2173.48	1908.05	2134.94	2056.5	1983.62	1905.25	2532.39	2305.18	1369.66	2087.89	2162.57	2074.17	2537.66	2046.81	1642.5	2193.43	2172.89	2017.64	1847.08	1901.63	2047.7	2160.42	1603.78	2350.5	1962.71	2018.55	2164.21	2346.31	1983.2	2015.28	1942.48	1377.97	1756.32	1978.61	1645.93	1805.58	2009.63	1971.17	2218.04	1999.81	2090.92	2714.64	1586.7	2267.04	1869.47	2309.25	1719.06
ATXN3	2396.29	2396.87	2046.04	2232.31	2321.29	1857.28	1780.81	2238.03	2582.04	1720.96	1958.51	2410.45	1931.31	2348.52	1964.69	2202.28	1593.19	2242.98	1569.6	2203.32	2001.46	1902.7	1894.79	1975.75	1470.13	1887.88	2163.39	2298.01	1922.22	1641.76	1411.25	2277.71	2289.38	1443.5	1941.47	1598.44	1028.45	1664.72	1958.12	1959.39	2317.23	1765	2435.07	1603.83	1790.26	1792.5	1403.71	1975.08	1972.19
GOLGA5	2396.28	2423.57	2751.4	2502.21	2357.35	2782.5	2070.73	2016.46	2470.06	1872.59	2206.34	2251.11	2318.49	2227.27	1986.94	2382.5	2585.88	2288.17	2715.85	2335.31	2808.9	2266.79	2458.44	2326.25	2531.99	3375.41	2618.34	2054.71	2334.59	2264.9	2860.61	2510.71	2311.22	2183.41	2245.44	2915.6	2121.77	2859.24	2302.17	2481.22	2191.38	2799.73	5164.56	2848.83	2247.27	2708.17	2301.05	5489.99	3271.88
FGFR2	3775.05	3052.4	3250.34	2516.26	5848.8	3293.54	2309.1	2652.15	5956.42	1611.18	2030.91	2451.25	1603.38	3371.64	2395.76	2442.9	3552.29	3897.42	3710.77	2605.28	2261.38	4475.89	4686.02	3301.59	2669.82	3100.73	2263.22	3827.31	5764.06	1640.61	3091.79	2305.71	3002.25	3198.3	3251.45	812.162	2415.7	646.255	3097.35	2407.91	4183.15	1945.61	803.421	3948.24	1888.76	2923.84	992.368	1342.44	1817.9
LRRC40	970.048	1126.73	1329.05	1118.96	972.797	1222.41	1168.85	994.664	1254.04	1104.21	840.007	1056.09	1173.71	1064.58	1248.71	1024.89	967.53	1142.35	1037.87	1038.19	1361.68	844.589	981.375	1182.41	1103.64	750.201	1113.74	1005.65	998.715	1094.09	1038.95	1109.33	1141.08	604.152	894.474	1571.58	565.631	1174.54	802.417	1038.69	988.9	910.858	1063.6	1254.52	901.794	1058.03	1001.37	1075.98	1193.47
ISOC1	1779.99	1711.91	1831.58	1519.13	1553.87	1912.4	1403.8	1225.24	1310.05	1945.18	1849.93	1356.3	1366.87	1591.7	1344.05	1820.05	1995.28	1522.25	1434.62	1465.73	1433.91	1547.14	1599.98	1948.87	1994.26	1636.99	1729.45	1681.22	1778.14	1690.11	1540.32	1623.32	1303.77	1369.76	1620.65	2296.39	1420.41	2596.56	1309.2	1524.31	1340.28	1799.4	1815.17	1239.27	1687.37	2175.36	1864.62	1690.33	1241.48
EML1	2375.8	3834.5	2816.02	2045.81	2896.35	2828.64	2188.75	1370.81	2621.14	2114.47	2909.22	2538.7	1887.93	3336.62	2254.89	2740.97	2320.72	2210.8	1236.25	3095.07	1879.3	1961.43	2492.41	2953.79	2195.79	583.433	2204.37	1936.24	2615.55	1565.06	2180.96	2190.94	1978.81	1421.22	1522.69	401.27	2338.81	693.852	3166.33	2605.35	2081.94	568.485	309.978	623.429	1272.44	587.829	955.831	567.338	537.579
TRMT11	814.589	638.606	828.292	790.96	755.395	735.035	591.338	678.174	789.196	776.763	584.504	756.847	631.305	653.078	699.033	608.991	854.651	854.6	751.564	890.027	739.724	777.308	860.453	746.727	869.747	688.12	806.936	718.06	917.174	668.047	712.126	855.958	582.266	444.936	695.144	893.788	762.743	612.956	730.309	678.671	620.552	1015.85	952.674	1312.61	740.239	911.341	559.979	568.458	846.146
THUMPD1	2966.03	3377.52	3150.73	3007.34	3595.64	3268.78	2721.62	3514.83	4187.89	3114.5	2185.52	3260.57	3116.44	2925.84	2718.79	3252.91	2889.41	3456.63	3462.3	3295.18	3200.99	3388.96	3333.88	2848.87	2544.53	3840.41	3172.06	3470.08	2934.55	2420.72	3133.57	3196.64	3584.32	2944.35	2930.57	4492.93	3141.85	2345.25	2966.55	3523.32	3190.01	3867.18	6982.83	9019.64	2451.97	3851.39	3250.46	4193.63	4178.08
MSANTD3	773.627	696.513	837.273	708.487	529.979	819.436	826.207	541.621	532.484	1019.59	1011.02	604.307	759.904	641.919	684.204	688.211	568.698	564.19	896.759	673.667	776.366	537.085	719.542	733.284	851.996	493.576	764.908	573.349	543.747	1023.21	521.777	722.937	678.015	805.453	685.089	472.318	546.72	606.292	517.096	638.193	565.733	546.142	581.57	480.657	406.121	393.695	1005.49	652.275	631.819
KIF26A	1839.59	1882.95	1282.35	1551.94	2012.72	1646.76	1047.42	1476.64	1694.6	1160.02	1946.41	1908.16	1516.77	1878.85	1649.06	1676.47	1269.95	1384.9	1304.76	999.835	1425.01	1181.99	1705.91	2092.33	529.391	272.048	1121.11	1638.73	1102.02	755.432	1427.05	797.189	1440.15	913.104	1775.88	298.549	789.87	365.476	1418.35	1280.8	1463.86	261.41	172.104	435.922	728.057	669.766	835.609	995.533	513.578
ATG2B	2438.17	3298.26	2435.5	2807.73	2950.45	2059.9	2827.01	2965.05	3236	2526.58	2026.51	2638.77	3131.7	3042.31	3082.06	2462.71	1982.17	3029.78	2645.3	2610.41	2489.05	2503.82	2128.65	2623.88	1769.79	2263.82	2036.26	2878.62	2610.1	1805.82	2276.59	2394.32	3280.85	1641.37	2152.5	2477.83	1993.04	2449.97	2552.46	2509.93	2693.58	2631.18	3798.26	2418.61	1826.8	2452.55	2287.28	3808.86	2804.49
ARFGEF1	3671.69	4337.68	3868.63	4296.87	4560.42	3661.63	4490.91	3662.21	4644.31	4664.32	2476.12	4014.5	3949.37	4203.38	4768.19	3783.68	3818.57	4192.11	4500.17	3682.67	3509.77	3541.66	3865.54	3668.22	4095.03	9236.26	3829.8	3971.09	4326.61	4392.86	3620.08	3677.42	3810.87	4030.75	3108.95	8087.29	4457.13	5610.95	4096.51	3879.94	4332.89	4141.55	3796.21	4480.28	3841.68	3422.16	3092.74	4244.18	3362.39
ACSM2B	25.1992	1.72597	17.0804	5.5969	22.0395	20.1956	6.92689	7.20143	0.0220348	4.61974	6.61493	8.73675	14.4787	15.9927	6.37715	15.8457	13.1471	15.6737	6.14398	3.33378	14.4276	2.16939	9.99352	11.6452	4.19694	0	4.22626	16.3013	23.6378	23.4658	24.2	4.0798	27.1081	0.0562312	15.2902	1.90352	2.42907	1.88363	8.23231	11.9297	3.16083	0	0.0123735	0	4.44667	2.18791	1.54388	3.48794	0
ZFAT	661.906	635.944	800.483	616.642	641.184	692.255	538.622	614.878	678.267	674.433	731.419	630.542	648.067	630.764	599.476	669.397	860.115	574.631	722.932	614.046	607.559	538.15	582.629	745.843	533.555	957.91	613.614	816.661	650.706	573.631	601.636	580.68	679.438	1007.91	730.345	768.983	631.696	914.704	583.014	598.576	626.212	756.924	935.047	716.729	635.128	695.649	603.895	1077.05	517.273
MTFR1	794.099	665.322	961.109	823.756	865.598	759.807	727.695	722.479	745.888	718.146	766.526	690.776	819.977	808.597	676.797	681.278	837.132	805.024	951.978	726.461	917.423	731.405	891.433	834.578	1070.21	2211.02	943.525	801.262	811.117	622.039	791.973	809.874	721.604	875.747	859.27	928.332	1055.59	3554.14	767.4	682.843	697.885	903.956	1020.07	968.951	1591.1	586.753	742.84	1328.61	923.713
STAG3	112.637	123.801	84.322	99.3248	103.191	70.963	132.926	171.838	126.78	112.552	69.1238	147.681	179.608	102.831	131.332	108.924	72.3541	155.642	133.952	83.4174	82.227	100.381	110.929	97.6879	224.452	228.982	55.7109	152.855	115.995	90.9285	88.1833	83.4701	184.184	110.106	136.483	181.445	479.031	385.543	186.439	123.891	122.45	172.88	156.539	131.341	116.214	173.645	181.258	105.7	193.99
FECH	1283.78	1257.64	1515.69	1357.94	1165.15	1339.49	1472.53	1605.05	1126.23	1152.57	1277.53	1294.12	1477.21	1167.43	1359.93	1336.81	1434.29	1629.21	1607.42	1306.47	1409.46	1605.86	1632.96	1149.21	1433.58	1887.13	1836.61	1544.67	973.322	1727.85	1596.97	1286.9	1377.75	1784.12	1398.7	1225.95	1222.05	2512.82	1115.55	1313.54	1707.88	1253.2	1097.82	1171.7	1286.84	1141.09	947.689	1270.06	1625.79
MYO9A	4421.13	4973.66	4130.68	4684.86	5023.28	3553.57	4332.77	4155.94	4977.09	4647.58	3219.59	3636.56	4001.87	4547.91	4517.18	3951.03	3429.59	4596.39	3771.11	4372.57	3129.93	3364.42	3589.72	3422.59	2402.53	3457.87	2669.84	4240.6	4178.89	2793.68	3304.4	3298.45	4565.68	2469.04	3375.36	4265.41	2435.81	1696.11	3484.66	4610.17	4164.53	4249.14	2211.18	5861.43	2567.02	3634.59	2514.03	2642.29	2794.3
PFKP	1339.62	1382.31	2290.12	3064.52	1582.92	1912.44	3547.76	1805.76	2314.77	1869.8	1552.8	2163.67	3572.18	1932.18	2371.4	1921.05	2202.4	2869.81	3168.83	2067.87	2163.63	2199.53	2565.37	2355.84	3355.78	6984.78	2866.3	2305.23	2007.4	2947.04	2685.13	1954.4	2446.22	4463.91	1804.85	1955.55	4502.01	5026.52	2337.2	1411.27	2484.73	2202.75	5277.57	1974.08	2613.52	2397.58	8595.74	7018.44	4483.82
IDI1	3589.76	4071.36	4124.4	3491.84	4025.43	4362.87	4741.86	3028.31	4441.46	3312.63	2847.86	3589.93	4038.37	4179.45	6049.72	3591.57	3572.04	4493.79	3814.06	5294.97	3606.4	4534.63	4758.97	4135.28	5989.04	4004.64	4793.28	3419.41	4722.67	5964.87	3946.91	3999.06	3307.17	3276.8	2795.73	2881.03	2703.83	5808.95	2900.63	3110.2	3215.81	1979.13	4165.24	2586.12	2644.48	3150.36	2810.71	2564.22	2391.54
SP100	6816.48	7240.47	7270.66	7305.16	6603.19	6069.3	6404.62	5374.86	8633.58	6486.69	6181.44	5842.99	4436.15	6550.3	6195.9	5888.91	5419.41	5854.34	5617.81	6563.96	5074.73	5340.78	6777.69	6091.31	5269.67	5116.12	6937.75	5841.33	6179.06	6702.58	6118.59	5520.66	4571.65	5714.19	5326	4813.57	4136.01	4142.28	5733.26	5578.82	6592.88	4571.61	4411.98	4398.41	4779.96	4420.86	3698.29	4055.88	4396.98
KLF6	35410.9	36336.8	37116.1	20545.3	38284.7	20655	78778	23459	22634.1	37999.2	18504.9	22138.1	33136.3	23317.6	131503	18655	19996.8	31423.5	18180.7	37798.8	36462.5	46746.1	35281.5	22890.6	48874.1	10830.5	31423.2	14382.2	39223.2	56115.6	16150.7	25397.2	36148.2	14775.4	38697	9935.31	13745.6	6967.25	28170.8	18065.3	21315.7	6971.37	7306.31	14032.9	12290.7	16343.8	14365	6138.95	10228.6
PLPP1	2096.52	1713.68	2571.95	1547.24	2300.25	2042.98	3313.93	1650.25	2022.11	1370.25	1853.23	1344.64	1603.45	1887.57	1697.79	1367.51	1367.48	2461.23	2213.78	1679.51	1511.66	2058.57	1868.81	1345.53	1685.21	1479.23	1832.42	1216.35	1678.43	1903.73	2027.77	1911.69	1328.47	1744.36	1551.96	1386.27	2680.09	1465.78	1951.94	1480.46	1607.08	881.58	871.837	821.41	1397.49	1097.96	974.499	1287.3	1276.59
NEO1	4368.99	5938.32	3984.41	3527.46	4460.24	5204.78	3411.46	3182.05	4870.38	4348.03	5323.88	3886.26	3244.21	4794.34	3428.41	4470.9	3303.59	3267.08	2915.25	3956.09	2575.71	4074.44	3377.85	4425.74	2584.21	4100.28	2825.34	3290.09	3671.36	2434.9	3232.91	3823.39	3069.08	4070.49	2956.55	2322.29	3210.31	3978.59	4230.41	6051.1	3218.24	3517.97	1927.14	4921	2746.27	3384.39	2487.2	2433.31	1698.73
TRAM1	9681.02	13194.8	16748.9	15531.5	14006.9	14042	15881.5	13527.6	15481.7	11784.5	7546.72	13804	14333.3	13367.7	11967.1	12999.8	16630.7	14834.1	28728.1	12272	14619.9	13542	14933.5	12990.3	12647.4	16428.9	13388	12557.2	11936.7	15267.6	12013.4	11893.5	15459.5	13539.2	10476.9	19856.2	10798.7	22564.7	10048.1	14629.5	13019.7	12041.1	12832.7	19024.3	16794	12486	10383	16961.7	12499.1
PHKA1	346.299	563.829	355.341	357.042	500.925	435.623	458.38	415.039	475.419	529.324	379.437	413.883	435.08	386.729	558.151	433.721	407.619	377.281	549.098	447.978	419.851	408.949	425.729	414.142	576.344	506.721	302.618	481.126	476.706	360.015	377.872	438.242	496.481	403.975	373.467	2130.35	873.734	476.837	590.229	449.303	417.401	972.813	1470.99	916.612	713.7	832.628	699.79	1017.4	1033.67
TNFRSF1A	10763.7	9587.42	12892.8	9695.83	10100.7	9667.89	16045.3	9369.85	9489.36	19313.1	12974.8	9953.67	10854	13022.5	14209.3	9965.7	10902.3	14011.7	11944.2	12376.7	8788.85	10532.1	9648.86	11778.3	12971.1	7158.46	14116.1	8008.19	11617.7	23632.9	10345.9	14169.1	8651.02	14900.6	10779.3	5079.49	7304.99	5688.02	8409.33	8303.71	9587.84	4807.25	6530.89	6069.82	9944.94	5969.62	10057.1	10956	7354.8
CACNB1	670.279	765.101	616.484	892.181	821.517	616.862	561.548	834.627	833.565	638.143	552.706	585.846	408.377	701.734	372.84	639.689	866.702	905.031	1217.83	752.881	665.317	1075.18	764.513	953.831	395.74	1696.89	571.593	690.022	966.12	790.766	725.125	595.527	442.96	481.245	661.6	1364.2	533.761	424.483	584.052	1569.89	717.239	2618.41	1324.84	2677.56	1998.22	1563.84	1472.05	1877.43	2299.25
EVI5	1742.74	2153.7	2184.25	1948.35	2173.01	1847.14	1949.25	2086.11	2104.52	2484.73	1992.5	2154.93	2243.22	2433.06	2073.78	1930.95	1917.51	2243.85	1692.3	1828.55	1727.13	1663.53	1994.73	1997.26	1747.86	2428.15	1986.87	1890.12	1943.07	2127.98	1875.49	2251.83	2116.65	1511.4	1435.54	2697.7	1556.18	1464.83	2027.13	1779.79	2041.55	1084.58	1302.04	2939.29	1684.05	1578.96	1356.56	2055.46	1616.54
STOML1	1225.15	1018.06	916.218	1002.75	1090.01	1243.78	749.483	1052.55	1039.58	1008.39	1289.57	1020.14	832.116	966.491	565.6	1352.66	1061.75	862.391	1063.44	1023.72	952.98	1258.84	1232.22	920.628	1075.44	1143.38	1066.46	1021.93	1228.03	876.954	938.67	889.436	591.041	1554.62	1134.05	1649.35	854.86	839.488	1010.48	1299.25	867.186	790.43	655.175	1079.38	920.599	1143.23	1088.37	939.342	734.35
PKM	19934.6	20965.2	27927.7	29805.4	22120.8	22821.8	32985.6	22385.7	20513.8	24359.8	37584.2	26994.9	22682.4	24611.1	24927.7	29052.4	39282.3	25752.6	33542.2	24326.8	25995.5	21700.5	27626.4	31903.5	24105.6	30268.7	35260.3	32082.6	28617.8	45912.4	32210.4	25619	18849.5	69164.8	23908.8	33239	33175.1	42653.6	19258.9	20907.3	32230.8	26536.1	35390.1	32296.7	37272.5	28643.3	36213	41032.6	39512.1
DHX29	1831.18	2091.34	2320.65	2430.06	2419.47	2131.92	1894.25	1979.4	2333.78	2162.85	1842.28	2219.05	2113.12	2185.81	1767.7	1901.25	2171.71	2131.69	2566.56	2141.98	2363.53	1993.45	2154.63	2141.59	1967.12	3004.36	2330.45	2032.11	2200.46	2196.44	2098.33	1804.62	2070.23	1948.07	1602.2	3284.27	1758.09	1959.78	2023.02	2016.68	2210.77	2588.17	2331.42	1510.54	2177.54	2944.33	2480.75	3179.63	1616.52
DNTTIP2	2440.96	2418.22	2614.08	2313.83	2468.56	2680.09	3157.04	1879.91	2706.72	3919.2	2434.43	2235.56	3201.66	2511.95	5563.55	1614.08	2147.62	2249.9	2644.28	2945.13	3145.45	2329.79	2394.48	2452.64	5093.18	2398.67	3065.93	2240.11	2723.38	4962.79	2747.33	3736.26	2502.88	2415.18	2581.33	3242.02	1723.87	2209.15	2284.66	2176.02	2068.08	1462.18	2009.03	2769.83	2184.19	2038.42	2257.99	2419.52	1962
METTL22	594.878	637.737	499.825	619.46	529.979	569.572	591.313	624.836	514.519	525.584	671.104	649.977	649.613	630.784	637.596	485.212	630.036	625.945	615.567	660.914	552.024	597.931	582.629	651.714	517.891	613.767	641.976	555.272	563.7	560.636	596.071	482.735	515.451	428.527	758.856	574.092	513.635	954.693	473.83	478.847	617.369	523.801	780.588	1175.56	730.254	571.622	876.296	755.563	987.521
TP53BP1	1522.1	1730.61	1658.36	1735.61	2049.78	1704.19	1861	1879.03	1856.25	1972.15	1319.22	1801.28	2288.13	1851.68	1929.73	1693.3	1742.19	1403.13	2215.83	1653.1	1781.54	1804.46	1867.81	1624.33	1997.4	2648.04	1458.38	1849.43	1808.04	2086.65	1440.96	1490.33	2284.97	1631.99	1837.58	1849.97	3392.01	2452.83	2162.07	1878.42	1929.48	1767.56	1619.25	3142.03	1637.59	2360.87	2173.5	2579.08	1526.92
TRO	298.835	370.549	218.935	198.657	237.439	353.426	297.95	360.811	270.468	202.774	330.066	363.37	564.622	299.834	349.506	203.985	186.305	173.824	343.569	174.539	528.604	413.188	246.843	248.294	186.913	124.953	285.794	277.632	243.772	73.2764	395.546	281.104	342.57	75.0189	393.721	173.752	252.684	906.254	241.035	368.489	337.745	118.633	527.618	230.336	225.738	185.529	407.316	508.57	514.593
RRP15	921.636	953.916	1075.07	869.668	927.713	884.758	1307.49	991.951	1029.02	1609.38	973.78	838.453	1137.19	1078.94	926.749	1056.58	941.234	850.214	1000.04	1014.34	1021.84	1109.37	1049.33	1283.71	1417.9	1001.96	1459.41	966.758	889.047	1230.98	1162.44	1288.53	1020.63	852.323	774.68	1615.73	758.071	1128.84	879.671	889.43	993.721	1065.69	1609.91	889.95	1009.12	1119.51	1007.05	1352.71	811.018
RHOA	33175.7	28749	39405.3	30747.2	29301.1	32163.2	32581.1	27242.4	27198.2	27661.2	44937.9	32127.7	30902.2	32858.4	32027	34366	38209.6	36153.8	27406	33634	31573.3	30353.3	32969	34772.1	31913.5	15837.1	43614.4	33876.9	34255.9	41968.1	35702.4	36330.8	26296.8	43290.1	34033.3	22314.9	24054.3	17185	26350.7	27961.6	30794.6	15810.2	19515.9	20822.3	27253.4	20030.2	25227.6	18476.4	20575.4
DHX8	2377.66	2625.76	2622.16	2534.07	2602.81	2413.33	2793.79	2449.61	2283.07	3023.35	2740.36	2501.78	2702.64	2821.4	2580.04	2639.96	3078.94	2938.48	2782.32	2757.76	2352.44	2305.23	2478.42	2695.59	1946.25	2998.6	2778.04	2808.98	2886.53	2630.77	2716.69	2488.6	2656.71	3466.43	2624.03	2125.49	2516.09	3274.24	2426.8	2585.77	2663.71	2486.63	3468.62	2579.46	2918.87	2780.43	2582.31	2879.98	2364.75
PRKCZ	3973.33	3826.42	3340.97	4029.78	4048.48	4187.26	3079.15	2662.09	3397.66	5243.89	7521.36	2729.12	1965.47	3397.14	3337.32	4028.27	4769.61	3707	3022.62	3778.08	2987.76	3337.72	3848.55	4560.21	3303.6	2222.11	3331.77	3871.62	3761.09	3309.42	3767.72	3451.82	2613.26	3220.54	2844.36	1784.68	1923.38	1217.35	3097.35	3056.3	2932.97	1791.63	2285.81	2923.09	2579.17	1968.31	1315.89	2109.47	1351.4
IARS2	4154.86	4260.18	5175.25	4658.61	4555.41	4703.93	4536.76	4487.79	4211.16	3935.91	3756.91	5089.05	4956.51	4693.81	3959.03	4861.05	5476.36	4605.06	5011.44	4701.31	4491.61	4363.81	5344.6	4869.46	5480.57	7232.16	5176.78	4550.79	4729	4838.99	4953.37	4191.39	4661.57	5311.5	4476.68	9319.96	6538.68	5305.4	4346.82	5238.18	4441.66	6413.19	7208.85	4638.27	5600.96	5652.52	5805.17	7144.79	4809.89
SYT1	111.731	59.6431	50.2143	69.3361	58.1079	76.56	108.835	104.002	79.2432	121.888	95.3982	87.4397	166.799	61.3451	73.0906	43.566	57.0085	61.6878	69.5372	58.7198	93.2946	120.631	45.9705	86.9504	92.9256	24.4186	120.813	57.849	92.4427	76.742	111.432	116.241	77.007	46.9176	102.977	86.3884	81.5358	217.991	157.595	67.3785	47.4507	97.1548	176.222	66.6067	77.4951	30.2428	115.387	25.3473	29.5165
NAV3	583.729	472.961	452.282	462.956	542	309.581	665.721	597.739	363.442	426.053	352.025	309.92	887.939	602.939	689.463	324.794	185.222	331.197	446.848	514.436	337.675	493.285	370.764	295.792	292.368	227.941	351.995	228.765	220.186	154.706	311.015	377.306	786.507	154.612	470.765	278.4	323.522	227.468	460.422	386.159	345.761	176.269	111.977	372.17	278.85	305.23	297.468	321.539	223.521
IDH3G	2097.45	1861.54	2105.27	1890.24	1673.09	1963.08	1913.73	1984.82	1638.62	1743.29	3225	1711.89	1890.23	1814.98	1985.87	2146.82	2382.07	2264.72	1909.07	2022.75	2043.66	1983.84	2144.64	2037.6	1953.55	1591.19	2494.35	1906.4	1957.57	2339.23	2465.09	2453.28	1640.57	2635.27	2106.41	2286.78	1896.25	4775.28	1722.25	1862.37	2233.3	2970.92	1794.45	1897.94	2546	1778.5	5561.51	2127.86	2834.95
ROGDI	2924.14	2342.51	2266.79	2601.55	2845.25	2798.27	1993.96	1983.9	2616.92	2067.02	3493.69	2880.69	1900.84	2700.97	2105.56	2552.82	3853.58	2047.34	1917.26	1990.35	2349.11	3203.17	3904.52	2909.85	3546.86	2355.36	3456.78	2753.81	3181.99	2759.41	2849.47	2270.5	1688.53	2673.89	2837.64	3195.94	3539.67	2574.65	2807.92	2897.76	2437.24	3101.67	4138.28	5578.75	4237.72	3892.34	3011.53	3315.15	3961.03
PDZD4	917.944	556.661	732.271	558.533	686.267	1001.74	649.759	617.591	492.339	608.378	819.135	679.122	821.553	772.747	758.334	1023.9	542.4	712.014	531.723	624.267	711.949	622.494	637.594	567.426	785.173	203.401	555.83	471.147	631.67	424.953	635.063	656.407	940.592	399.23	846.916	326.399	2243.63	254.115	1088.72	650.101	697.271	475.661	87.0994	257.928	368.474	478.859	700.757	405.371	277.095
ATP2B3	0.903698	0	0	0	3.00588	4.49631	9.03799	9.13117	1.07799	5.59862	0.0285465	4.86105	10.1643	7.29233	1.08162	0	0.0282951	0.81695	2.05183	1.65201	8.79234	3.21333	3.99744	0	12.4588	0	3.16008	1.77696	0	3.55866	8.41198	0.212745	13.6998	2.40762	0.764006	3.82893	4.75661	14.3288	10.2857	1.61716	5.62378	4.26735	5.18844	0.930282	0.0359345	7.53921	6.50451	2.35473	4.60315
ROCK1	6701.04	7302.82	6434.28	6550.74	6652.28	5563.91	8369.86	6236.62	6772.07	6704.37	4574.97	6748.49	7459.14	6988.91	8029.24	5404.69	5409.55	7270.58	5814.13	6315.26	5610.07	5822.32	5788.32	5955.94	4906.32	5716.01	5960.61	5676.73	7180.52	7375.3	5325.67	6570.69	7006.07	5502.3	5327.67	5655.52	4020.31	5744.19	5609.65	6073.73	7261.05	5338.01	4453.45	6612.39	4411.51	6151.86	4090.89	4020.29	4767.41
CBFB	2704.43	2203.55	3008.94	2743.99	2720.02	2619.31	3168.5	2632.27	2851.46	2941.47	1950.85	2685.4	2795.44	2578.94	3196.45	2784.53	3072.38	2993.25	2678.02	2570.37	2629	3027.01	2962.12	2423.96	3077.02	3823.26	3450.48	2337.78	2553.9	4214.57	2875.46	3778.78	2646.58	3343.55	2970.77	4332.61	3216.24	3781.55	2649.3	2681.03	2778.14	3193.67	4481.42	2752.69	3627.01	3484.7	3737.36	2812.26	4516.17
PDK3	512.017	692.976	586.889	613.839	650.2	467.156	568.392	602.231	498.671	540.473	439.754	599.455	588.749	755.239	735.023	685.242	651.942	554.648	829.267	557.843	452.074	436.718	457.709	521.714	451.07	403.679	583.139	685.526	530.166	769.469	397.361	283.252	322.471	605.283	469.814	820.827	375.538	515.869	563.444	566.531	607.669	381.843	524.554	477.805	489.092	530.652	786.822	769.366	518.196
HYAL2	10475.1	9114.47	11289.2	9247.88	13045.1	11470	17093.8	10046.2	14642.9	5808.51	11150	10968	7659.88	10438.7	11096.5	9670.61	5927.84	17810.1	5147.45	9946.86	8951	17490.4	12108.3	9202.85	4816.54	3931.83	13405.8	4922.45	11254.3	6617.67	10094.3	11179.7	7472.21	5156.94	9874.08	2774.46	4413.46	3201.88	11640.6	8614.94	9628.31	2188.99	2811.4	3690.24	4635.01	3621.68	6631.06	3549.48	4652.87
HDAC4	1426.21	2134.12	1207.85	1937.11	1929.56	1519.59	2166.93	2290.49	1742.15	2012.16	1467.25	1786.71	2279.78	2193.84	2417.97	1863.62	1683.02	1870.89	1806.82	1573.9	1579.4	1383.79	1337.15	1669.16	1296.81	705.218	1105.35	1921.79	1882.36	1578.01	1279.41	1222.32	1971.43	1807.51	1453.17	1204.83	1517.17	908.015	1590.39	1816.94	1942.47	1176.65	1528.02	1241.19	1201.64	1581.1	1364.73	999.071	847.967
RASSF1	3067.5	3660.76	3140.85	2860.2	2730.04	3926.11	3930.53	3847.6	3448.37	3983.38	3815	2903.03	3366.71	3310.23	3906.06	3927.26	2756.83	4444.27	2796.64	3499.58	3374.26	2911.7	3052.06	3702.31	3252.43	2032.5	3494.62	2978.08	2828.5	3567.87	3104.79	3374.12	2154.54	1799.41	2903	1910.45	2231.52	1893.15	2591.6	2954.28	3567.33	1663.47	1338.33	1857.97	2260.52	2074	2582.36	1778.77	2042.38
FGFR3	2195.19	2741.56	1974.23	1841.5	3975.34	2800.51	1158.61	2525.57	3511.74	1554.44	2551.75	1879.97	1639.16	2012.73	1667.09	2665.71	2984.71	1951.71	1470.41	3015.84	2042.57	4368.03	3421.82	1692.45	2926.66	6517.25	1688.49	2977.2	2932.75	750.732	3378.71	2438.67	2459.29	1733.87	1709.39	578.873	6125.22	588.193	3978.04	2334.53	2562.97	2825.55	1073.99	2317.7	2990.78	2149.5	846.048	3001.69	483.996
IFI35	3213.67	3346.35	3468.43	3405.64	2938.43	3496.12	2503.89	2182.84	3623.73	2247.49	3995.91	2728.15	1712.17	2583.73	1762.41	3343.03	3238.92	1971.7	2728.12	3333.52	2837.8	2562.55	2723.27	2842.61	2482.92	2057.85	3707.9	2454.45	2692.57	2703.95	3240.35	2874.94	1656.61	3487.51	2471.59	2555.58	1850.21	2293.86	2504.06	2488.81	2869.24	2121.06	2706.69	1331.59	2052.53	1401.03	2046.63	2691.67	2169.84
HEATR6	662.828	795.384	755.591	872.496	847.565	688.896	566.135	839.145	832.511	653.957	834.501	727.698	708.905	688.168	566.652	758.517	918.199	901.547	761.79	746.913	754.165	915.037	876.442	826.516	532.515	948.061	813.242	1145.87	812.935	640.912	994.4	586.314	776.719	805.479	736.167	825.615	714.371	944.194	754.004	902.102	877.674	864.416	1249.15	895.669	896.254	801.356	983.506	929.001	975.464
COASY	2387.9	2483.26	2482.18	2205.13	2173.01	2395.31	2267.82	2149.39	2214.4	2028.88	3037.52	2052.91	1934.33	2297.45	1905.39	2658.78	3003.33	2510.75	2707.67	2315.73	2306.9	2465.38	2332.52	2432.94	2335.7	3018.24	2329.4	2495.16	2666.3	2319.19	2386.16	1974.71	1864.15	3802.43	2500.89	3249.69	3599.94	5286.39	2535.99	2795.7	2595.18	3355.39	4047.07	2628	3646.92	2456.89	3547.97	4306.15	3030.78
PLEKHH3	2603.9	3125.49	2191.42	2043.94	2330.3	2457.2	1343.09	2301.32	2578.87	1721.89	3331.38	1787.67	3035.14	2330.16	1726.39	2077.51	1930.66	1977.8	2205.61	1946.93	2261.35	2306.29	2072.68	2682.17	1492.06	2383.18	1476.25	1993.22	1535.22	1294.79	2648.93	1601.32	3004.97	1797.07	2711.18	2274.3	2336.6	3043.91	2104.4	2388.51	2197.06	2811.81	2746.08	3360.94	2550.41	3730.55	3148.11	3847.92	2931.04
MEF2A	4674.33	6274.07	6516.86	5299.63	5388.95	4734.33	5399.64	5089.12	6326.22	5634.58	4300.82	5891.57	5444.86	5913.15	5705.52	5363.1	4486.96	5979.55	4302.83	5741.23	5165.79	4681.99	5384.57	5601.86	4061.63	3874.66	5071.72	5138.63	5255.55	5252.08	5191.05	5849.6	4844.51	3855.12	3430.61	2912.71	3669.6	2583.21	4811.36	4687.69	5500.84	2769.61	1991.42	4190.93	3705.57	3531.07	3249.64	2553.89	3420.6
OTUD5	4054.33	4040.2	3485.45	3330.65	3734.9	3786.56	3534.07	3454.23	3597.34	3452.18	5604.59	3185.75	3282.25	3637.98	3795.92	3822.3	3696.94	3915.65	3571.71	3782.34	3368.71	3446.63	3406.83	3839.45	3433.07	3184.08	3678.49	3960.24	3956.85	3369.61	4241.24	3904.7	3427.61	4781.11	3728.78	4488.13	3818.37	3084.82	3612.39	3506.45	3816.27	3778.58	4698.08	3324.75	3540.71	3163.31	4019.41	5410.8	3952.68
TFE3	5220.81	6073.65	6172.25	5310.87	4934.11	5465.98	6583.37	5758.27	4991.9	8451.43	7467.71	4622.7	5978.85	6060.66	8125.62	5829.5	5885.07	5946.5	6076.92	6698.54	5652.27	4958.53	4767.97	6183.65	6430.72	3882.82	6079.33	5040.95	5474.87	9437.11	4663.67	5417.11	4276.95	6324.07	5133.39	4900.94	3910.48	3875.77	4384.92	5040.09	5265.44	3771.68	3326.61	4210.9	4529.89	4234.27	4749.33	5726.61	4544.8
TBC1D25	1268.89	1280.81	1239.29	1146.14	1151.13	1276.45	1459.91	1125.78	1232.92	1361.9	1570.29	1013.33	1331.92	1389.17	1365.22	1255.61	1331.29	1403.17	1171.83	1356.74	1348.37	1210.81	1167.26	1219.15	1172.55	1054.25	1320.73	1241.69	1114.72	1465.85	1369.49	1358.89	994.557	1290.11	1340.93	1639.74	1002.45	927.053	1026.97	1091.8	1202.5	1119.88	947.505	1133.63	1036.78	1069.9	1076.96	1741.94	1247.97
ACSL4	4907.99	6027.31	7655.63	8460.67	7641.11	5095.67	9279.73	6344.22	8347.28	11872.9	4388.56	5801.2	7727.63	6113.26	12437.3	4477.83	7461.8	7198.4	7651.62	7941.99	6120.99	6559.05	6498.86	6701.78	7752.58	5653.06	8055.69	5071.69	7736.97	16393.3	7009.92	9870.57	5078.32	5766.88	5132.52	2640.06	3799.53	3214.25	4621.84	4531.65	6361.55	2421.22	3484.19	6508.64	3828.41	3964.65	4980.96	5409.72	5667.14
[truncated: 18,171 more rows]
[truncated: 120 more columns]
