# Supplementary material for: Proteogenomic analysis of air-pollution-associated lung cancer reveals prevention and therapeutic opportunities
Source: eLife. 2024 Oct 21;13:RP95453. doi: 10.7554/eLife.95453 (PMC11493407; doi:10.7554/eLife.95453)
Supplement: Supplementary file 5. [file elife-95453-supp5.xlsx]

## Sheet: Description
Table S5. Proteomic expression results normalized by column (patient) median.

## Sheet: S5
Protein	Description	Gene	Gene groups	XWLC_0002__normal_protein	XWLC_0016__tumor_protein	XWLC_0159__tumor_protein	XWLC_0120__tumor_protein	XWLC_0121__tumor_protein	XWLC_0122__tumor_protein	XWLC_0161__tumor_protein	XWLC_0123__tumor_protein	XWLC_0087__tumor_protein	XWLC_0097__tumor_protein	XWLC_0100__tumor_protein	XWLC_0102__tumor_protein	XWLC_0017__tumor_protein	XWLC_0103__tumor_protein	XWLC_0104__tumor_protein	XWLC_0105__tumor_protein	XWLC_0088__tumor_protein	XWLC_0106__tumor_protein	XWLC_0109__tumor_protein	XWLC_0107__tumor_protein	XWLC_0134__tumor_protein	XWLC_0137__tumor_protein	XWLC_0115__tumor_protein	XWLC_0021__tumor_protein	XWLC_0158__normal_protein	XWLC_0138__tumor_protein	XWLC_0149__tumor_protein	XWLC_0023__tumor_protein	XWLC_0024__tumor_protein	XWLC_0026__tumor_protein	XWLC_0027__tumor_protein	XWLC_0036__tumor_protein	XWLC_0037__tumor_protein	XWLC_0038__tumor_protein	XWLC_0003__tumor_protein	XWLC_0040__tumor_protein	XWLC_0041__tumor_protein	XWLC_0043__tumor_protein	XWLC_0044__tumor_protein	XWLC_0046__tumor_protein	XWLC_0047__tumor_protein	XWLC_0055__normal_protein	XWLC_0055__tumor_protein	XWLC_0057__normal_protein	XWLC_0057__tumor_protein	XWLC_0004__tumor_protein
D3DTZ7	Septin 4, isoform CRA_k	2021-09-04	CDCrel-1;hCG_2002594;SEPTIN4;SEPTIN5;SEPT5;SEPT4	0	483030	862699	0	0	0	366417	0	1.16779e+06	863522	0	0	0	1.43135e+06	612570	0	3.25935e+06	349625	470068	0	0	911861	1.19583e+06	0	1.03193e+06	0	1.45295e+06	0	0	312949	0	934565	991350	0	1.05768e+06	0	0	0	2.4137e+06	0	1.35268e+06	550008	0	0	0	0
Q8TC62	Septin-7	2021-09-07	DKFZp686F17268;Nbla02942;LOC392884;SEPTIN11;SEPTIN2;SEPT8;SEPTIN6;SEPTIN7;SEPTIN8;SEPT7;SEPT6;SEPTIN14	1.2767e+08	2.56124e+08	1.6579e+08	2.70124e+08	2.97886e+08	1.83215e+08	2.99242e+08	2.22005e+08	2.31515e+08	2.38053e+08	2.24865e+08	2.11166e+08	1.69522e+08	2.43077e+08	200323103	2.04242e+08	1.6401e+08	1.91196e+08	1.58704e+08	2.16694e+08	2.69251e+08	1.89879e+08	1.45605e+08	1.78419e+08	1.99734e+08	2.34011e+08	291844677	198443809	2.35935e+08	2.27867e+08	1.35926e+08	1.73879e+08	2.34397e+08	1.05532e+08	1.87022e+08	1.81097e+08	2.22313e+08	235853924	2.44039e+08	2.36623e+08	1.77572e+08	1.62967e+08	1.10605e+08	1.52423e+08	165211848	1.53325e+08
B7ZVZ1	Septin-8	2021-09-08	SEPT6;DKFZp547B243;Nbla02942;DKFZp686F17268;SEPT8;SEPTIN6;SEPTIN7;SEPTIN8;SEPTIN10;SEPTIN11;SEPT7;SEPTIN14	1.35118e+07	4.26006e+07	2.0054e+07	2.93848e+07	2.30273e+07	1.60505e+07	1.78425e+07	1.55364e+07	3.18664e+07	1.58313e+07	3.74396e+07	2.6788e+07	1.48422e+07	3.85106e+07	2.32611e+07	2.62057e+07	1.91727e+07	1.60933e+07	1.70387e+07	2.28463e+07	3.60435e+07	3.33951e+07	1.26179e+07	3.17778e+07	1.8552e+07	4.12488e+07	3.83998e+07	1.90662e+07	3.89719e+07	2.29794e+07	2.04378e+07	1.73289e+07	3.57872e+07	1.21339e+07	2.84803e+07	2.23685e+07	2.23717e+07	2.05451e+07	2.93906e+07	3.69682e+07	2.20965e+07	2.10815e+07	1.12773e+07	1.455e+07	2.23071e+07	1.41197e+07
P04217	Alpha-1B-glycoprotein	A1BG	DKFZp686F0970;A1BG	2.78276e+08	108625182	2.12224e+08	2.05955e+08	1.12876e+08	139580765	9.78876e+07	1.0572e+08	9.04881e+07	1.21749e+08	1.42908e+08	2.15037e+08	1.21264e+08	1.43848e+08	1.82429e+08	1.08455e+08	1.90171e+08	1.40726e+08	1.52916e+08	1.16109e+08	1.85678e+08	1.06698e+08	2.86558e+08	3.34416e+08	2.53243e+08	9.5411e+07	1.28922e+08	1.34436e+08	1.02247e+08	1.83748e+08	1.97072e+08	2.07353e+08	9.62977e+07	3.08007e+08	1.24923e+08	2.42502e+08	1.85998e+08	1.67426e+08	1.00582e+08	216847243	1.42413e+08	3.5505e+08	189865458	2.00192e+08	194476977	2.82286e+08
P01023	Alpha-2-macroglobulin	A2M	A2M;PZP	2666662252	8.96835e+08	1876814835	1790569444	1201281674	1534645978	9.81987e+08	1738703824	1380816037	7.68831e+08	1331431885	9.83939e+08	1162906065	1988962216	1281014981	1130152575	1159326219	742410997	1443198801	840897237	1611099149	7.7826e+08	2.41525e+08	9.27962e+08	1340384655	1232655407	1349069511	1775217420	9.19105e+08	1597874567	2838834136	1742730544	1269141982	1916256316	1969343073	1273852074	1923174208	7.74378e+08	8.08551e+08	2172131819	1693793513	3305618496	1170475577	2954248042	3224117945	1815865071
Q9NRG9	Aladin	AAAS	AAAS	931664	3.86466e+07	0	2.0572e+07	1.76944e+07	1.41428e+07	2.62565e+07	1.0825e+07	2.43897e+06	2.45522e+07	948518	0	0	0	3.21861e+07	0	0	0	0	4.71189e+07	2.60999e+07	819617	2.06578e+07	930097	610459	1.71606e+07	1.87214e+07	0	4.01914e+06	0	0	1.54897e+06	0	0	2.11977e+06	0	1.07823e+06	0	2.19176e+06	1.55478e+06	685313	0	0	0	1.53518e+07	0
Q86V21	Acetoacetyl-CoA synthetase	AACS	AACS	1.05042e+06	1.45451e+06	1.29014e+06	913128	810879	636421	2.56937e+06	1.90148e+06	953574	2.12784e+06	3.82852e+06	2.01974e+06	3.04304e+06	987344	2.02251e+06	2.36159e+06	1.0376e+06	0	1.34718e+06	2.65109e+06	2.01688e+06	2.20081e+06	1.47884e+06	3.96651e+06	3.08551e+06	1.24644e+06	1.37395e+06	1.76754e+06	5.16344e+06	3.35718e+06	0	1.83201e+06	2.36415e+06	1.04424e+06	1.68982e+06	1.15733e+06	2.95225e+06	4.88463e+06	4.8048e+06	4.87629e+06	3.42497e+06	2.66031e+06	1.16226e+06	0	2.61974e+06	2.77228e+06
P22760	Arylacetamide deacetylase	AADAC	AADAC;AADACL2	1.88232e+07	7.61592e+06	3.79244e+07	2.14833e+07	2.53238e+07	5.48748e+07	1.47789e+07	4.92151e+07	3.13067e+07	1.83139e+07	1.99559e+07	1.54224e+07	2.52569e+07	2.06392e+07	2.09486e+07	2.95211e+07	2.52896e+07	5.12983e+07	3.55596e+07	1.44463e+07	2.13609e+07	1.13234e+07	3.29238e+07	1.70835e+07	5.55977e+07	3.16646e+07	2.48324e+07	2.69857e+07	2.15201e+07	1.01222e+07	3.54922e+07	7.15116e+06	1.88332e+07	2.16109e+07	2.29067e+07	2.42132e+07	1.44772e+07	1.18173e+07	1.36866e+07	2.17331e+07	3.16544e+07	3.47304e+07	2.38066e+07	3.92526e+07	2.71261e+07	1.3444e+07
Q6PD74	Alpha- and gamma-adaptin-binding protein p34	AAGAB	AAGAB	0	0	2.30953e+06	2.14194e+06	1.09288e+06	0	1.71423e+06	1.30055e+06	755518	823705	1.75312e+06	2.91843e+06	0	1.61028e+06	2.01522e+06	1.22957e+06	1.47518e+06	0	2.06308e+06	2.11423e+06	1.51447e+06	4.2344e+06	0	1.06053e+06	2.10268e+06	1.07162e+06	1.84453e+06	0	0	1.3153e+06	0	0	2.91609e+06	0	0	994581	3.27246e+06	544855	1.12059e+06	2.01541e+06	2.26386e+06	0	1.78414e+06	0	0	0
Q2M2I8	AP2-associated protein kinase 1	AAK1	AAK1	4.36652e+06	1.6444e+07	2.69975e+06	5.2587e+06	8.09822e+06	5.86245e+06	8.31108e+06	6.88949e+06	5.09476e+06	6.11773e+06	6.21295e+06	1.26965e+07	8.87348e+06	2.76024e+06	6.96924e+06	1.44757e+07	2.67895e+06	5228770	4.74022e+06	5.18863e+06	5.55828e+06	5.87213e+06	0	3.74211e+06	1.40191e+06	2.18673e+06	6.13192e+06	8.55853e+06	1.3769e+07	1.01934e+07	2.54667e+06	6.00678e+06	1.36425e+07	1.81172e+06	3.68037e+06	6.8833e+06	6.16762e+06	8.48782e+06	1.57058e+07	5.35558e+06	6.60576e+06	1.27943e+06	6.6759e+06	6.50024e+06	6.80551e+06	6.6501e+06
A0A096LP25	AP2-associated protein kinase 1 (Fragment)	AAK1	AAK1	2.35802e+07	5.53664e+07	3.28058e+07	3.46474e+07	3.6863e+07	3.53481e+07	5.33008e+07	3.37006e+07	3.43327e+07	4.02171e+07	4.81493e+07	3.09047e+07	3.00721e+07	4.06247e+07	4.48448e+07	3.87993e+07	3.47781e+07	5.3912e+07	2.18607e+07	53725224	3.32559e+07	5.40415e+07	1.87142e+07	4.86456e+07	2.14757e+07	3.96455e+07	2.86685e+07	3.26906e+07	5.73722e+07	4.47629e+07	2.63993e+07	4.89888e+07	3.84834e+07	1.99581e+07	3.80942e+07	3.90076e+07	4.02738e+07	5.17511e+07	7.42353e+07	3.7557e+07	3.62234e+07	2.2652e+07	2.08975e+07	2.06556e+07	2.51973e+07	2.28178e+07
Q9H7C9	Mth938 domain-containing protein	AAMDC	AAMDC	1.66203e+07	1.16455e+07	7.92433e+06	9.86601e+06	8.21282e+06	1.21464e+07	9.64206e+06	7.52762e+06	1.50328e+07	1.45108e+07	1.20569e+07	1.70504e+07	1.6293e+07	1.23202e+07	1.36543e+07	1.74989e+07	1.99899e+07	1.39597e+07	1.24256e+07	1.21852e+07	7.69061e+06	1.08991e+07	1.43256e+07	2.53373e+07	1.61307e+07	9.57991e+06	1.255e+07	1.34998e+07	2.8045e+07	2.71101e+07	1.22066e+07	2.60184e+07	1.41001e+07	8.21514e+06	1.59496e+07	1.16165e+07	1.45111e+07	2.12557e+07	2.95624e+07	1.90017e+07	1.60943e+07	2.41207e+07	1.95196e+07	2.10261e+07	1.68459e+07	1.17488e+07
C9JG97	Angio-associated migratory cell protein	AAMP	AAMP	1.08276e+06	2.71034e+06	2.97612e+06	4.14951e+06	3.3806e+06	2.25332e+06	2.95109e+06	4.00845e+06	2.70422e+06	5.04626e+06	3.21128e+06	2.12629e+06	2.97328e+06	2.80371e+06	3.19166e+06	3.57397e+06	2.21489e+06	2.36262e+06	3.06906e+06	3.82566e+06	4.13027e+06	3.38914e+06	3.03259e+06	4.87354e+06	4.64458e+06	5.10152e+06	5.01249e+06	3.78947e+06	5.44448e+06	3.28488e+06	1.46127e+06	4.65128e+06	6.04474e+06	1.78419e+06	2.02834e+06	2.4073e+06	4.34016e+06	4.42125e+06	4.45471e+06	7.51019e+06	2.90339e+06	3.50379e+06	1.91836e+06	2.62535e+06	0	3.81115e+06
Q9Y312	Protein AAR2 homolog	AAR2	AAR2	1.41894e+06	0	6.2841e+06	3.2968e+06	6.78196e+06	7.7709e+06	0	0	0	2.66979e+06	280502	2.57671e+06	1.87699e+06	0	3.12892e+06	2.80577e+06	0	2.26648e+06	0	8.571e+06	7.50879e+06	9.1083e+06	8.27109e+06	2.52115e+06	839837	4.91377e+06	622391	424039	2.47072e+06	2.38576e+06	2.61838e+06	3.11177e+06	0	2.6982e+06	2.8443e+06	2.49935e+06	0	5.10347e+06	1.49155e+06	0	3.10666e+06	1.62515e+06	988231	613615	2.30013e+06	2.21685e+06
A0A6Q8PGN5	Alanine--tRNA ligase	AARS1	AARS1	3.87747e+07	3.14491e+08	8.37139e+07	1.22884e+08	1.2839e+08	1.29953e+08	1.87783e+08	1.14172e+08	1.07618e+08	157960799	1.36523e+08	2.51248e+08	8.85782e+07	1.14465e+08	1.43153e+08	9.69562e+07	1.27425e+08	1.36832e+08	9.77218e+07	2.22501e+08	1.3557e+08	2.32951e+08	1.61884e+08	1.41491e+08	6.52591e+07	9.95251e+07	107640081	1.77894e+08	1.40098e+08	1.00429e+08	6.37583e+07	9.41754e+07	2.09808e+08	4.85842e+07	8.57151e+07	1.89034e+08	1.09712e+08	1.30932e+08	2.21127e+08	9.86071e+07	1.33001e+08	5.47688e+07	5.81093e+07	5.41302e+07	7.51693e+07	6.48177e+07
Q5JTZ9	Alanine--tRNA ligase, mitochondrial	AARS2	AARS2	1.68764e+06	1.40784e+07	1.31354e+07	6.61809e+06	2.02333e+07	1.42786e+07	2.61762e+07	1.3489e+07	1.59749e+07	2.19428e+07	4.28283e+06	1.72386e+07	2.08043e+06	7.74134e+06	1.44346e+07	1.46415e+07	6.03303e+06	2.68224e+07	8.99427e+06	2.91367e+07	8.85548e+06	1.49836e+07	9.61611e+06	1.0578e+07	1.14964e+07	1.06508e+07	1.33632e+07	7.85994e+06	2.36204e+07	1.23436e+07	8.77481e+06	1.40487e+07	1.05028e+07	5.66825e+06	8.70119e+06	1.72682e+07	1.04786e+07	5.08668e+06	1.87562e+07	8.52746e+06	1.07098e+07	7.85792e+06	3.85569e+06	2.33956e+06	4.99707e+06	4.40457e+06
Q9BTE6	Alanyl-tRNA editing protein Aarsd1	AARSD1	AARSD1;PTGES3L-AARSD1	3.39931e+07	3.33469e+07	1.99655e+07	1.68317e+07	9.44549e+06	1.69713e+07	1.91319e+07	1.47854e+07	2.05142e+07	2.20377e+07	1.89532e+07	29810126	3.2687e+07	2.12958e+07	2.19262e+07	1.52769e+07	1.4274e+07	1.40961e+07	1.81909e+07	15304213	2.89214e+07	3.38043e+07	2.72334e+07	8.55979e+06	3.24363e+07	2.29414e+07	2.74548e+07	2.08488e+07	1.8311e+07	2.79231e+07	2.06774e+07	3.09912e+07	2.42278e+07	2.38877e+07	1.66329e+07	2.9719e+07	4.90748e+07	3.57351e+07	3.99083e+07	3.64377e+07	3.76857e+07	4.21221e+07	3.37504e+07	4.20854e+07	2.30651e+07	2.34059e+07
Q9NRN7	L-aminoadipate-semialdehyde dehydrogenase-phosphopantetheinyl transferase	AASDHPPT	AASDHPPT	3.57992e+06	1.90153e+07	7.60129e+06	1.03503e+07	9.67448e+06	7.36039e+06	9.32258e+06	7.7515e+06	1.37528e+07	1.78729e+07	1.60912e+07	1.04442e+07	1.01233e+07	1.48356e+07	1.69541e+07	1.64446e+07	1.54867e+07	1.34173e+07	1.12308e+07	1.68897e+07	1.37034e+07	1.48524e+07	1.23024e+07	2.98127e+07	4.31475e+06	9.57035e+06	6.02623e+06	1.9393e+07	2.60495e+07	1.91749e+07	1.00849e+06	1.88528e+07	1.99731e+07	2.95751e+06	6.90118e+06	1.75019e+07	2.02885e+07	1.66652e+07	6.91467e+07	1.62891e+07	1.16147e+07	6.60846e+06	6.33454e+06	6.79096e+06	5.56391e+06	6.73959e+06
Q9UDR5	Alpha-aminoadipic semialdehyde synthase, mitochondrial	AASS	AASS	5.34112e+07	6.16682e+07	4.54923e+07	5.42576e+07	5.41497e+07	4.94394e+07	6.55364e+07	5.46139e+07	5.73597e+07	5.12919e+07	1.12599e+08	5.05539e+07	3.87102e+07	5.72157e+07	4.57936e+07	4.71744e+07	5.78894e+07	6.11365e+07	5.71165e+07	62030708	5.65676e+07	5.41212e+07	3.56388e+07	6.52018e+07	6.43518e+07	6.26366e+07	5.94672e+07	5.31826e+07	7.88643e+07	6.0506e+07	5.54482e+07	8.78973e+07	5.46319e+07	6.34761e+07	5.25208e+07	7.27987e+07	7.79234e+07	5.48267e+07	7.67513e+07	6.98732e+07	5.6133e+07	4.61679e+07	6.89907e+07	5.83546e+07	4.99773e+07	5.66449e+07
Q2L9S7	Alpha-1-antitrypsin MBrescia variant (Fragment)	AAT	AAT;SERPINA1	0	0	0	2.84131e+06	674957	1.07542e+06	0	1.29326e+06	0	0	0	2.55069e+06	0	0	2.96055e+06	0	1.34088e+06	0	1.39762e+06	0	0	0	0	0	0	1.65353e+06	0	0	0	0	0	0	0	0	0	0	0	0	0	0	0	0	0	0	0	0
Q9NY61	Protein AATF	AATF	AATF	4.71065e+06	1.91783e+06	2.09133e+06	1.40374e+06	1.22173e+06	1.50386e+06	1.63675e+06	2.42832e+06	3.35724e+06	1.36681e+06	1.19561e+06	1.69811e+06	2.28969e+06	0	4.04565e+06	2.13278e+06	0	4.51675e+06	0	0	0	0	0	4.79867e+06	949712	2.14399e+06	1.45662e+06	3.45431e+06	1.18219e+06	2.88377e+06	6.83195e+06	1.98424e+06	1.6174e+06	6.64474e+06	4.83192e+06	2.5028e+06	1.14011e+06	763488	0	2.89294e+06	1.97274e+06	1.91036e+06	2.2012e+06	3.94969e+06	3.9101e+06	0
P80404	4-aminobutyrate aminotransferase, mitochondrial	ABAT	ABAT	6.45305e+06	1.35158e+07	5.22626e+06	4.75219e+06	6.32622e+06	1.80166e+06	7.21734e+06	0	4.29801e+06	3.39363e+06	8.86389e+06	2.40272e+06	3.81975e+06	3.4406e+06	7.86365e+06	1.03841e+07	3.19158e+06	2.09766e+06	3.87651e+06	2.0753e+06	4.24569e+06	9.74958e+06	2.29206e+06	4.58812e+06	2.40315e+06	5.21789e+06	8.01338e+06	2.08966e+06	1.47932e+07	4.40939e+06	5.23535e+06	3.05349e+06	1.37768e+06	3.17773e+06	1.19822e+07	1.97419e+06	3.37062e+06	2.66655e+06	4.89001e+06	0	4.18463e+06	5.53107e+06	0	5.07902e+06	2.24335e+06	0
Q99758	ATP-binding cassette sub-family A member 3	ABCA3	ABCA3	1.25805e+08	1.74819e+08	1.73759e+08	1.85892e+08	1.79686e+08	1.62892e+08	1.12422e+08	1.75555e+08	1.67864e+08	1.21911e+08	1.50257e+08	1.55339e+08	1.53564e+08	1.61034e+08	1.78372e+08	1.70486e+08	1.41258e+08	1.21405e+08	1.1439e+08	1.62009e+08	1.71715e+08	1.43597e+08	1.69938e+08	1.86055e+08	1.88502e+08	1.45172e+08	2.63011e+08	6.98229e+07	7.03603e+07	1.56076e+08	8.22075e+07	1.64726e+08	5.42479e+07	1.38684e+08	6.15189e+07	1.14118e+08	6.6364e+07	9.17221e+07	8.33709e+07	8.5822e+07	9.60274e+07	1.18308e+08	9.92135e+07	8.1056e+07	2.25139e+08	9.95997e+07
O94911	ABC-type organic anion transporter ABCA8	ABCA8	ABCA6;ABCA8;ABCA9	5.50016e+06	1.1531e+06	2.27022e+07	2.94235e+07	2.86518e+07	1.71135e+07	4.85336e+07	3.7806e+07	2.11336e+07	1.57386e+07	1.69818e+07	1.01286e+07	3.51097e+07	2.38279e+07	2.9869e+07	2.12778e+07	1.4737e+07	1.62226e+07	2.16785e+07	1.81679e+07	4.59689e+07	3.82129e+07	1.24487e+07	1.00624e+07	2.54229e+07	3.02658e+07	4.75741e+07	3.40806e+06	2.71869e+07	3.31847e+07	5.08371e+06	2.00941e+06	2.19472e+07	8.81489e+06	9.62426e+06	1.82278e+06	3.46869e+07	2.68917e+07	3.52295e+07	4.51623e+06	1.94741e+07	6.98007e+06	7.156e+06	1.76204e+07	7.30496e+06	5.87586e+06
Q9NRK6	ATP-binding cassette sub-family B member 10, mitochondrial	ABCB10	TAP2-G;TAP2;ABCB8;ABCB10	0	0	0	2.1306e+06	319179	0	0	949867	0	0	1.38448e+06	0	0	0	0	0	0	0	0	0	0	0	2.11587e+06	0	0	0	1.17692e+06	0	0	0	0	0	0	0	0	0	0	2.21165e+06	986404	0	582637	0	0	0	0	0
Q4G0Q4	ATP-binding cassette, sub-family B (MDR/TAP), member 4	ABCB4	ABCB4	0	1.15019e+06	0	0	0	0	753472	0	0	0	0	0	2.9674e+06	0	862224	0	0	0	0	0	5.84148e+06	0	2.75323e+06	0	0	0	1.19685e+07	9.02103e+06	0	0	0	951652	0	0	1.44525e+07	0	0	0	0	0	3.00286e+06	0	0	0	4.75036e+06	8.53494e+06
Q9NP58	ATP-binding cassette sub-family B member 6, mitochondrial	ABCB6	ABCB6	0	4.43304e+06	0	0	0	0	905227	1.2796e+06	4.48176e+06	4.12564e+06	0	2.03071e+06	0	0	1.95428e+06	0	2.81067e+06	1.45489e+06	1.10749e+06	1.31429e+06	1.98039e+06	2.10697e+06	0	1.84571e+06	0	2.62837e+06	709293	1.49821e+06	3.91227e+06	787248	1.17947e+06	0	3.97742e+06	0	2.12316e+06	2.487e+06	2.45786e+06	2.98359e+06	5.30671e+06	1.32524e+06	1.73497e+07	0	1.73371e+06	0	1.81567e+06	1.42361e+06
A0A0S2Z2Z3	ATP-binding cassette sub-family B member 7 isoform 1 (Fragment)	ABCB7	ABCB7	3.27667e+06	925381	9.61609e+06	1.47973e+07	1.6276e+07	2.78791e+07	4.31626e+07	3.06652e+07	6.43036e+06	1.03601e+07	9.0855e+06	2.59626e+06	3.02759e+06	2.46306e+06	8.16811e+06	1.05532e+07	7.73572e+06	6.55057e+06	5.11719e+06	1.7587e+07	8.4419e+06	1.66737e+07	1.09879e+07	1.48206e+06	5.49795e+06	1.33453e+07	8.96593e+06	1.04919e+07	7.81478e+06	4.93665e+06	4.84512e+06	7.71199e+06	1.09513e+07	0	1.45457e+06	3.01432e+06	7.05632e+06	4.73236e+06	1.41051e+07	3.72949e+06	8.52827e+06	3.2379e+06	2.16956e+06	0	0	1.78916e+06
I3L4X2	Multidrug resistance-associated protein 1 (Fragment)	ABCC1	MRP;DKFZp781G125;MOAT-B;ABCC4;MRP3;ABCC1;ABCC3	5.01286e+06	1.06888e+07	4.52224e+06	7.96269e+06	1.33382e+07	1.05943e+07	2.58384e+07	0	1.13339e+07	5.16329e+06	7.42624e+06	5.65815e+06	2.64405e+07	9.3613e+06	9.65366e+06	1.17229e+07	7.49108e+06	0	601873	5109924	9.37959e+06	9.52982e+06	0	8.88185e+06	7.08638e+06	5.15768e+06	9.95884e+06	1.7893e+07	7.20597e+06	1.40478e+07	3.92077e+06	7.18802e+06	1.23499e+07	7.20927e+06	1.07852e+07	1.21566e+07	6.76396e+06	8.69496e+06	5.91357e+06	8.83861e+06	1.689e+07	1.12009e+07	1.40627e+07	1.28371e+07	2.21737e+07	1.92885e+07
O15438	ATP-binding cassette sub-family C member 3	ABCC3	MRP;DKFZp781G125;MOAT-B;ABCC4;MRP3;ABCC1;ABCC3	5.00913e+06	4.03883e+07	2.17133e+07	4.71395e+07	4.19999e+07	2.41185e+07	4.43929e+07	4.31494e+07	5.48492e+07	4.08984e+07	6.2364e+07	4.46697e+07	2.51774e+07	4.28132e+07	6.13169e+07	3.90995e+07	3.41961e+07	7.60064e+07	1.79183e+07	4.57009e+07	4.57652e+07	4.29141e+07	3.97798e+07	3.15979e+07	4.33441e+07	5.64976e+07	5.50212e+07	3.58726e+07	4.55758e+07	2.6245e+07	2.17304e+07	4.49863e+07	4.33263e+07	5.19431e+06	3.73624e+07	3.028e+07	4.15623e+07	5.77796e+07	5.69149e+07	3.70894e+07	4.14021e+07	2.34221e+07	1.83184e+07	27150729	3.07257e+07	1.82098e+07
O15439	Multidrug resistance-associated protein 4	ABCC4	MRP;DKFZp781G125;MOAT-B;ABCC4;MRP3;ABCC1;ABCC3	548493	4.57464e+06	811678	1.61423e+06	1.84531e+06	606741	5.60172e+06	4.46879e+06	2.08376e+06	3.90636e+06	2.83179e+06	0	245706	6.15728e+06	633699	1.07096e+06	3.64483e+06	2.30926e+06	630800	4.01771e+06	3.50251e+06	1.46453e+06	1.56988e+06	4.75821e+06	3.14146e+06	2.89301e+06	676455	996040	5.16299e+06	0	0	5.0375e+06	3.35946e+06	0	1.21016e+06	0	1.50797e+06	3.29056e+06	4.88406e+06	0	3.23871e+06	0	0	564054	2.14733e+06	0
P33897	ATP-binding cassette sub-family D member 1	ABCD1	ABCD1;ALD	1.06413e+07	1.56592e+07	1.71047e+07	1.51008e+07	1.05156e+07	13101245	1.54534e+07	1.12462e+07	9.92498e+06	1.19309e+07	1.24927e+07	1.19775e+07	1.56344e+07	9.69496e+06	1.03678e+07	1.47801e+07	9.40989e+06	5.70767e+06	6.55836e+06	1.39157e+07	1.90073e+07	2.2474e+07	1.33875e+07	8.51971e+06	1.41945e+07	2.21662e+07	3.05197e+07	1.01786e+07	9.63928e+06	1.11305e+07	8.93812e+06	1.80962e+07	1.36826e+07	8.66869e+06	1.18174e+07	1.43247e+07	1.88173e+07	2.36728e+07	1.95608e+07	1.32159e+07	1.09078e+07	9.75347e+06	9.79231e+06	1.4897e+07	1.53791e+07	8.19619e+06
A0A3B3ITW3	ATP-binding cassette sub-family D member 3	ABCD3	ABCD3	1.48187e+07	2.94279e+07	1.38794e+07	8.9649e+07	1.1714e+07	3.29669e+07	2.90154e+07	3.69544e+07	4.79397e+07	1.16022e+07	2.64046e+07	1.22197e+07	2.10056e+07	4.82565e+07	1.31222e+07	1.19797e+07	4.64516e+06	3.20954e+07	1.01394e+07	42540111	4.63641e+07	3.64798e+07	2.17868e+07	5.06505e+07	2.25458e+07	3.96887e+07	5.01412e+07	3.89244e+07	4.28766e+07	4.34545e+07	1.92162e+07	3.72106e+07	1.33075e+07	1.28919e+07	3.71943e+07	2.97094e+07	1.94184e+07	2.94929e+07	3.34176e+07	1.8381e+07	2.68533e+07	8.07788e+06	1.17614e+07	6.15267e+07	6.45668e+07	2.867e+06
P61221	ATP-binding cassette sub-family E member 1	ABCE1	ABCE1	3.94951e+07	7.83091e+07	3.82765e+07	5.67981e+07	6.87239e+07	5.05212e+07	6.7308e+07	5.69002e+07	8.60616e+07	6.71076e+07	1.06022e+08	44887072	4.65395e+07	9.16158e+07	6.2407e+07	6.04853e+07	4.52743e+07	1.11755e+08	6.41218e+07	8.29225e+07	8.95988e+07	6.4569e+07	3.89566e+07	7.32248e+07	3.65096e+07	7.19807e+07	5.06685e+07	6.45196e+07	6.39166e+07	6.92928e+07	3.52734e+07	9.45258e+07	7.18346e+07	3.45747e+07	5.15859e+07	5.31832e+07	7.0621e+07	7.15789e+07	1.13548e+08	6.06874e+07	1.47277e+08	5.35697e+07	7.74583e+07	5.68109e+07	5.20075e+07	3.83558e+07
H0Y990	ATP-binding cassette sub-family E member 1 (Fragment)	ABCE1	ABCE1	0	0	0	0	0	0	0	0	0	0	0	0	0	0	0	0	0	0	0	0	0	0	0	0	0	0	0	0	0	0	0	0	0	0	0	0	0	0	0	0	0	0	0	0	0	0
Q8NE71	ATP-binding cassette sub-family F member 1	ABCF1	ABCF1	4.20536e+07	5.17194e+07	3.22169e+07	5.1034e+07	3.96787e+07	4.60015e+07	5.81958e+07	3.80732e+07	5.12789e+07	7.5803e+07	4.88987e+07	5.71414e+07	3.88543e+07	4.66049e+07	5.60003e+07	7.73278e+07	4.03149e+07	6.2342e+07	3.31984e+07	6.56623e+07	5.23753e+07	5.55034e+07	5.47682e+07	7.45381e+07	4.62079e+07	6.25838e+07	4.88711e+07	7.72865e+07	105075956	4.30981e+07	2.90367e+07	8.83969e+07	6.38752e+07	4.16961e+07	5.27603e+07	3.81744e+07	4.96871e+07	57243912	1.18069e+08	5.93056e+07	6.48299e+07	7.28912e+07	2.8317e+07	4.02171e+07	4.74111e+07	40718345
A0A090N7Y2	ATP-binding cassette, sub-family F (GCN20), member 2	ABCF2	ABCF2	2.56521e+06	8.46844e+06	1.20495e+07	1.2521e+07	1.48951e+07	1.35128e+07	1.00775e+07	1.59452e+07	1.05903e+07	1.60289e+07	1.16816e+07	1.69983e+07	8.20753e+06	1.00439e+07	2.30095e+07	9.88492e+06	1.19856e+07	8.35037e+06	9.88995e+06	1.56264e+07	1.96756e+07	1.51622e+07	9.09906e+06	1.7275e+07	1.79366e+07	1.40796e+07	1.97515e+07	8.21119e+06	1.83064e+07	7.57535e+06	0	1.44567e+07	6.41355e+06	0	5.37246e+06	6.1835e+06	1.71136e+07	1.10808e+07	1.07291e+07	1.26797e+07	1.51739e+07	1.15176e+07	8.62609e+06	9.26314e+06	6.32127e+06	7.30797e+06
Q9NUQ8	ATP-binding cassette sub-family F member 3	ABCF3	ABCF3	6.67229e+06	9.09597e+06	6.41299e+06	7.56498e+06	9.48143e+06	1.14829e+07	1.13749e+07	5.68753e+06	1.06119e+07	1.14397e+07	1.60477e+07	1.11854e+07	9.46332e+06	8.81941e+06	1.08656e+07	1.30996e+07	1.26513e+07	1.03955e+07	1.01644e+07	2.35676e+07	1.45983e+07	1.57917e+07	6.24231e+06	9.2364e+06	8.29939e+06	1.08922e+07	1.01906e+07	9.95e+06	1.82769e+07	1.22461e+07	1.0214e+07	1.37995e+07	1.96508e+07	4.72429e+06	7.70176e+06	8.23058e+06	6.81482e+06	1.5779e+07	8.66527e+06	1.33908e+07	6.01035e+06	1.35066e+06	4.83432e+06	1.35088e+07	8.39328e+06	5.85206e+06
Q9NUJ1	Palmitoyl-protein thioesterase ABHD10, mitochondrial	ABHD10	ABHD10	1.52622e+08	2.32256e+08	2.48493e+08	2.14167e+08	1.61292e+08	2.09354e+08	3.05624e+08	1.90157e+08	1.47254e+08	2.30729e+08	2.10584e+08	1.79169e+08	168539122	1.7935e+08	2.33144e+08	2.8694e+08	1.97092e+08	208439363	3.37379e+08	1.87363e+08	3.06587e+08	207088628	1.49632e+08	3.12041e+08	2.85369e+08	2.37019e+08	3.36755e+08	1.86779e+08	1.10512e+08	2.48461e+08	1.77934e+08	3.03725e+08	2.4733e+08	1.89879e+08	1.26505e+08	1.70141e+08	3.49306e+08	3.70128e+08	1.81437e+08	2.00069e+08	224367460	286649018	1.67718e+08	3.71329e+08	2.1685e+08	2.19035e+08
Q8NFV4	Protein ABHD11	ABHD11	ABHD11	1.50292e+07	3.37989e+07	2.41978e+07	4.46471e+07	3.50574e+07	4.26564e+07	4.0822e+07	1.94469e+07	3.25095e+07	5.38726e+07	5.37995e+07	1.02636e+08	1.61117e+07	2.343e+07	3.83615e+07	5.27348e+07	2.67731e+07	3.81439e+07	2.97671e+07	6.52387e+07	3.04208e+07	5.28003e+07	2.05687e+07	4.24492e+07	1.49584e+07	2.93782e+07	2.81812e+07	4.72885e+07	6.13872e+07	3.24101e+07	1.50951e+07	6.29875e+07	4.57939e+07	8.08823e+06	2.24594e+07	2.4023e+07	2.75994e+07	1.63207e+07	5.35534e+07	6.50687e+07	3.19958e+07	1.38927e+07	1.76303e+07	2.2267e+07	2.65504e+07	1.37464e+07
Q8N2K0	Lysophosphatidylserine lipase ABHD12	ABHD12	ABHD12	1.86853e+07	14787388	1.57381e+07	2.27204e+07	2.29147e+07	1.94456e+07	1.99436e+07	1.57504e+07	1.08586e+07	1.03882e+07	1.45102e+07	1.44321e+07	1.20246e+07	9.61835e+06	7.01472e+06	1.68257e+07	1.46688e+07	0	2.96354e+07	2.6221e+07	1.67814e+07	1.15211e+07	1.23965e+07	1.69642e+07	10297649	1.38925e+07	2.10382e+07	1.56123e+07	2.67046e+07	6.0085e+06	0	1.51541e+07	2.75901e+07	1.28677e+06	3.51896e+06	1.09908e+07	1.37681e+07	2.34481e+07	2.47316e+07	1.14075e+07	8.82488e+06	7.24989e+06	1.81682e+07	1.11272e+07	6.43099e+06	2.57598e+06
A0A1B0GW23	N-acyl-L-amino-acid amidohydrolase (Fragment)	ABHD14A-ACY1	ABHD14A-ACY1;HEL-S-5;ACY1	6.29632e+06	3.31936e+07	6.64106e+07	5.40581e+07	3.04626e+07	3.25882e+07	2.09569e+07	2.46489e+07	4.45614e+07	4.27818e+07	3.71018e+07	3.50133e+07	8.03553e+06	3.07568e+07	2.19126e+07	2.73123e+07	3.81326e+07	3.56232e+07	2.81034e+07	2.4862e+07	3.87547e+07	3.08205e+07	2.11539e+07	4.00553e+07	4.8166e+07	4.19809e+07	4.79715e+07	2.80871e+07	1.58804e+07	1.39301e+07	1.50572e+07	2.61722e+07	3.07296e+07	6.75262e+06	2.99867e+07	2.5208e+07	2.61886e+07	2.29381e+07	2.82275e+07	2.12629e+07	3.93872e+07	1.35859e+07	2.35078e+07	2.78796e+07	2.6328e+07	1.48204e+07
A0A0G2JJD3	Alpha/beta hydrolase domain-containing protein 16A	ABHD16A	ABHD16A;BAT5	2.23293e+07	3.74344e+07	3.57265e+07	4.5346e+07	44613031	3.7983e+07	78030956	5.84792e+07	3.44376e+07	5.24479e+07	6.60373e+07	6.41075e+07	4.62336e+07	5.82728e+07	8.14709e+07	6.11098e+07	3.59537e+07	4.91672e+07	4.16078e+07	7.41446e+07	6.09638e+07	6.24371e+07	7.10738e+07	4.36065e+07	3.06975e+07	4.45765e+07	4.0788e+07	4.74083e+07	6.40007e+07	5.10479e+07	1.75781e+07	6.14052e+07	5.66427e+07	1.7204e+07	4.2591e+07	3.69505e+07	7.02941e+07	5.89815e+07	8.54316e+07	5.07608e+07	6.31499e+07	3.38144e+07	3.33742e+07	3.28135e+07	1.01136e+07	3.08404e+07
Q8IZP0	Abl interactor 1	ABI1	ABI2;argBPIB;ABI1;ABI-2	2.37453e+07	1.68799e+07	4.82826e+07	4.09038e+07	3.13818e+07	4.53232e+07	5.64385e+07	5.11535e+07	2.71233e+07	5.10814e+07	4.03889e+07	2.88724e+07	2.9666e+07	3.49734e+07	2.57608e+07	4.83611e+07	2.41203e+07	4.77487e+07	3.79812e+07	3.49867e+07	6.30192e+07	2.49886e+07	1.64267e+07	1.78852e+07	6.22118e+07	4.66515e+07	6.76431e+07	3.22574e+07	6.43958e+07	3.74738e+07	1.4585e+07	2.42231e+07	3.47637e+07	2.39365e+07	4.03537e+07	1.19556e+07	4.11718e+07	2.77423e+07	5.94295e+07	2.26693e+07	2.67276e+07	3.60275e+07	1.42275e+07	3.82693e+07	2.22361e+07	3.48928e+07
Q9NYB9	Abl interactor 2	ABI2	ABI2;argBPIB;ABI1;ABI-2	0	0	986126	0	782231	1.20722e+06	0	0	1.29781e+06	0	0	0	0	1.64722e+06	0	0	0	0	2.75606e+06	0	1.49573e+06	0	0	0	0	0	1.70929e+06	0	0	0	0	0	0	0	0	0	0	0	0	0	0	0	0	1.50828e+06	3.5465e+06	0
Q9P2A4	ABI gene family member 3	ABI3	ABI3	3.66606e+08	2.54488e+08	2.44975e+08	1.9652e+08	1.53521e+08	2.04535e+08	2.74525e+08	1.6795e+08	1.34178e+08	2.22062e+08	2.06785e+08	1.59083e+08	1.8998e+08	1.93197e+08	2.23156e+08	2.72661e+08	2.0291e+08	2.01034e+08	3.4815e+08	1.68447e+08	289321451	2.01839e+08	1.40648e+08	3.25307e+08	281169285	2.20206e+08	3.26767e+08	1.95627e+08	9.95572e+07	2.62458e+08	2.16303e+08	2.91233e+08	2.59377e+08	3.8546e+08	1.43107e+08	1.87331e+08	362172088	3.79533e+08	1.84783e+08	2.08938e+08	2.18723e+08	3.48951e+08	1.86551e+08	3.92792e+08	2.38075e+08	2.85953e+08
Q7Z7G0	Target of Nesh-SH3	ABI3BP	ABI3BP;DKFZp667H216	2.32749e+07	1.62885e+07	1.14478e+08	1.05899e+08	1.08732e+08	9.3017e+07	8.29427e+07	6.8712e+07	3.38969e+07	4.69674e+07	3.8768e+07	4.72089e+07	104354921	5.79149e+07	5.57545e+07	4.83006e+07	5.18822e+07	5.34249e+07	9.94731e+07	5.2278e+07	1.06005e+08	9.70825e+07	7.26056e+07	2.20843e+07	1.25623e+08	9.69663e+07	135655346	3.17691e+07	3.46616e+07	3.88955e+07	3.81095e+07	1.83238e+07	4.73025e+07	1.66515e+07	4.24838e+07	4.36565e+07	2.89836e+07	3.38982e+07	1.90548e+07	2.2624e+07	43171203	5.21057e+07	5.26393e+07	1.15492e+08	9.09787e+07	5.97404e+07
A0A0A0MRL6	Actin-binding LIM protein 1	ABLIM1	ABLIM1	953158	1.91801e+06	864917	741943	359955	373813	410798	199859	1.03257e+06	364398	793407	495105	0	1.83781e+06	37090.3	0	1.78349e+06	7.15199e+06	193882	105955	0	0	0	2.0295e+06	539349	775806	1.83571e+06	1.56262e+06	652085	2.84097e+06	6.57572e+06	764124	1.50107e+06	1.07583e+07	1.31855e+06	4.27039e+06	0	2.00839e+06	3.53388e+06	0	0	1.23199e+06	0	1.45139e+06	1.05755e+06	3.88949e+06
A0A0C4DGA7	Actin-binding LIM protein 3	ABLIM3	ABLIM3	0	0	878307	530896	424716	298325	0	175778	0	328686	0	0	0	429633	0	284573	0	0	388006	0	700187	0	409887	0	568248	999670	546921	0	0	0	0	0	0	256362	0	0	0	0	0	0	0	0	0	228931	0	0
I6TS22	ABO glycosyltransferase (Fragment)	ABO	ABO-B;ABO	0	0	0	0	0	4.20006e+06	2.39477e+06	2.49147e+06	0	0	0	0	0	4.39418e+06	0	6.81914e+06	0	0	4.28087e+06	0	0	0	0	3.09698e+06	0	0	0	0	0	4.63018e+06	5.67547e+06	3.77169e+06	0	5.43732e+06	5.33573e+06	0	5.74031e+06	0	0	5.15318e+06	0	0	5.07281e+06	0	3.60178e+06	0
E1Y3Y7	ABO glycosyltransferase	ABO	ABO-B;ABO	4.61354e+06	1.15734e+06	5.976e+06	3.4779e+06	2.54964e+06	2.76169e+06	2.18943e+06	3.55392e+06	3.00559e+06	1.77389e+06	1.22324e+06	3.15537e+06	2.26657e+06	2.50519e+06	1.59753e+06	1.7884e+06	2.19467e+06	1.0038e+06	4.18607e+06	2.91703e+06	4.84799e+06	3.02742e+06	7.07931e+06	2.21695e+06	4.08184e+06	2.63887e+06	3.15897e+06	1.67957e+06	1.25846e+06	1.37969e+06	1.41105e+06	1.78639e+06	1.65461e+06	4.10898e+06	1.92689e+06	1.79004e+06	1.53465e+06	1.41409e+06	0	1.76651e+06	3.44718e+06	8.36085e+06	8.85098e+06	3.97357e+06	4.64218e+06	5.82896e+06
Q12979	Active breakpoint cluster region-related protein	ABR	BCR/ABL;ABR;BCR-ABL1;BCR	2.98395e+07	7.13905e+06	1.02451e+07	1.41185e+07	1.06302e+07	2.19023e+07	1.45128e+07	1.70365e+07	4.89432e+06	8.42317e+06	1.13687e+07	4.45738e+06	2.80904e+06	4.59756e+06	6.24128e+06	1.29206e+07	6.46778e+06	9.1696e+06	4.5009e+06	1.54977e+07	1.85057e+07	1.53115e+07	1.06253e+07	1.06869e+07	1.47759e+07	1.69336e+07	1.2243e+07	5.64484e+06	1.07707e+07	6.13641e+06	0	8.4233e+06	1.27518e+07	920428	9.39297e+06	6.01962e+06	1.11777e+07	1.13209e+07	1.41233e+07	4.64351e+06	1.2398e+07	2.34705e+06	0	0	0	1.71908e+06
Q9P1F3	Costars family protein ABRACL	ABRACL	ABRACL	2.67471e+06	3.90331e+06	1.9938e+06	378412	6.97208e+06	4.21288e+06	4.41767e+06	1.70876e+06	3.65009e+06	2.59287e+06	2.49897e+06	2.98539e+06	0	0	1.00761e+07	2.0698e+06	1.4708e+06	0	3.15146e+06	16631448	1.67689e+06	7.55382e+06	1.92633e+07	7.61519e+06	514188	2.07854e+06	0	0	1.04625e+07	1.2836e+06	1.91619e+06	4.66125e+06	1.21064e+07	1.41712e+06	0	0	3.30419e+06	0	5.54117e+06	6.60632e+06	0	0	1.55008e+06	0	3.41508e+06	1.87076e+06
Q15018	BRISC complex subunit Abraxas 2	ABRAXAS2	ABRAXAS2	1.92606e+07	2.95497e+07	1.63273e+07	2.91234e+07	2.53453e+07	1.67922e+07	3.14498e+07	1.94307e+07	4.14712e+07	4.35659e+07	3.12608e+07	4.24584e+07	2.45706e+07	2.9565e+07	3.13163e+07	3.75136e+07	3.33346e+07	3.20909e+07	2.1913e+07	2.35293e+07	2.64696e+07	3.17682e+07	1.61887e+07	2.088e+07	1.65462e+07	1.21561e+07	1.75387e+07	3.89915e+07	5.20963e+07	2.04475e+07	1.99286e+07	3.39238e+07	3.25681e+07	1.52904e+07	4.4516e+07	3.01719e+07	4.06135e+07	2.64439e+07	5.32176e+07	3.22031e+07	6.43932e+07	2.41704e+07	1.77139e+07	1.1735e+07	1.79278e+07	1.51003e+07
A0A024R029	Activator of basal transcription 1	ABT1	ABT1	0	4.98326e+06	3.17851e+06	6.37405e+06	4.19489e+06	2.84203e+06	5.61143e+06	5.0642e+06	6.07455e+06	7.4125e+06	3.74588e+06	5.49703e+06	3.72966e+06	4.18451e+06	5.43917e+06	6.34463e+06	3.2256e+06	5.37071e+06	3.52502e+06	7.23485e+06	6.59724e+06	6.46549e+06	4.28339e+06	5.2383e+06	3.86009e+06	3.41868e+06	4.17061e+06	5.84249e+06	7.25177e+06	5.30912e+06	0	7.83949e+06	5.23586e+06	0	0	4.4772e+06	3.98036e+06	4.24081e+06	6.84836e+06	5.20657e+06	6.92735e+06	0	2.94113e+06	0	0	2.67884e+06
P42765	3-ketoacyl-CoA thiolase, mitochondrial	ACAA2	ACAA2	8.17828e+07	2.04057e+08	1.59813e+08	1.2994e+08	1.3408e+08	1.65779e+08	2.18858e+08	1.85017e+08	120529327	1.30082e+08	1.96543e+08	9.26275e+07	7.81362e+07	1.14866e+08	1.41674e+08	1.20823e+08	7.82367e+07	2.15394e+08	1.03457e+08	1.41516e+08	1.27115e+08	1.72143e+08	6.45982e+07	8.12429e+07	1.27541e+08	1.60202e+08	1.94663e+08	1.80594e+08	311110851	108316989	2.24098e+08	1.88083e+08	1.66025e+08	9.30282e+07	7.9888e+07	9.30572e+07	1.53569e+08	132328727	1.86062e+08	9.84827e+07	1.13606e+08	1.06028e+08	7.2956e+07	9.06784e+07	7.56993e+07	8.98731e+07
O00763	Acetyl-CoA carboxylase 2	ACACB	hCG_30204;ACACA;ACACB	0	0	3.23948e+06	0	2.56406e+06	2.53659e+06	2.02522e+06	2.13725e+06	0	1.71438e+06	2.07586e+06	0	5.56239e+06	1.36393e+06	1.66963e+06	2.07841e+06	0	1.22107e+06	1.86498e+06	869513	0	1.42745e+06	1.71861e+06	0	0	1.36763e+06	3.3832e+06	0	0	1.78503e+06	2.58532e+06	0	0	0	3.06824e+06	0	0	0	0	1.52482e+06	0	0	0	2.01941e+06	0	6.50224e+06
Q6JQN1	Acyl-CoA dehydrogenase family member 10	ACAD10	ACAD10	5.76124e+07	181222505	9.79395e+07	1.06616e+08	1.17149e+08	1.26278e+08	149170364	2.08548e+08	1.37004e+08	1.87959e+08	4.44782e+08	4.03816e+07	9.15545e+08	2.76459e+08	1.46053e+08	2.873e+08	6.0423e+07	2.34885e+08	1.97627e+08	57787024	9.00773e+07	186446936	2.44721e+07	1.54367e+08	12449479	8.57819e+07	1.23526e+08	2.4772e+08	1.29694e+08	2.70167e+08	5.623e+08	125633114	2.02033e+08	2.98788e+08	4.37765e+08	4.97618e+08	5.46814e+08	4.79971e+08	1.28561e+08	6.06997e+08	4.92748e+08	7.79494e+07	3.78577e+08	2.54047e+08	1.04046e+08	5.52158e+08
Q08AE9	ACAD11 protein	ACAD11	ACAD11	419089	1.23107e+06	0	1.32629e+06	1.20499e+06	0	834255	1.74911e+06	617845	1.36698e+06	909522	1.2194e+06	659516	1.69798e+06	0	1.42264e+06	938173	854999	758235	0	1.01987e+06	1.05877e+06	0	0	0	1.04357e+06	1.63987e+06	1.13647e+06	0	0	0	1.2656e+06	1.27215e+06	0	0	685396	704813	0	0	0	1.73424e+06	564303	0	652552	884574	1.22155e+06
Q9UKU7	Isobutyryl-CoA dehydrogenase, mitochondrial	ACAD8	ACAD8	7.32925e+07	7.405e+07	4.98166e+07	1.0169e+08	6.56137e+07	8.44232e+07	8.02966e+07	8.19126e+07	1.58414e+08	8.75209e+07	1.30279e+08	9.73006e+07	1.08062e+08	9.95961e+07	6.28635e+07	6.95678e+07	8.36733e+07	6.24279e+07	8.03323e+07	6.17496e+07	3.90423e+07	4.87222e+07	4.12997e+07	7.95481e+07	2.76119e+07	4.77752e+07	4.17521e+07	9.21189e+07	4.87111e+07	8.5044e+07	6.7848e+07	6.38436e+07	6.60984e+07	6.50001e+07	9.78367e+07	1.18044e+08	5.36367e+07	5.50651e+07	2.73712e+07	1.34877e+08	8.65873e+07	4.6943e+07	3.76344e+07	5.45641e+07	6.40282e+07	6.21322e+07
Q9H845	Complex I assembly factor ACAD9, mitochondrial	ACAD9	ACAD9	5.76419e+07	1.05415e+08	8.4127e+07	1.66372e+08	1.60208e+08	7.37672e+07	1.67555e+08	107027185	9.84497e+07	1.12188e+08	9.74432e+07	72553793	9.87365e+07	1.22639e+08	7.5778e+07	8.78636e+07	1.63545e+08	1.41737e+08	1.0957e+08	9.54605e+07	9.94592e+07	1.07911e+08	9.05778e+07	1.18804e+08	9.60716e+07	1.34352e+08	1.24105e+08	1.03557e+08	1.66548e+08	1.13207e+08	8.26695e+07	124543398	3.35469e+08	5.59216e+07	9.97748e+07	8.82725e+07	1.12623e+08	1.78969e+08	1.18851e+08	6.86861e+07	1.54668e+08	5.40215e+07	4.71745e+07	5.19753e+07	7.05774e+07	6.91718e+07
P28330	Long-chain specific acyl-CoA dehydrogenase, mitochondrial	ACADL	ACADL	0	3.32064e+06	8.82402e+06	7.43547e+06	8.92352e+06	4.30294e+06	9.59147e+06	7.9229e+06	8.10555e+06	4.5197e+06	9.73735e+06	1.34394e+06	6.76738e+06	5.49523e+06	1.01035e+07	5.14376e+06	2.02941e+06	1.19221e+06	3.43629e+06	7.88847e+06	1.21838e+07	1.92799e+07	0	4.9786e+06	1.13672e+07	1.35861e+07	1.54282e+07	6.92367e+06	1.07157e+07	4.71358e+06	1.28587e+06	8.78246e+06	5.60295e+06	821218	8.63936e+06	7.39887e+06	4.58653e+06	1.0902e+07	1.32042e+07	6.54943e+06	1.03166e+07	2.77669e+06	5.87773e+06	1.20909e+07	7.09229e+06	6.19871e+06
Q5T4U5	Medium-chain specific acyl-CoA dehydrogenase, mitochondrial	ACADM	ACADM;DKFZp686M24262	2.02366e+07	6.80625e+07	2.79229e+07	6.33298e+07	4.85429e+07	4.81882e+07	7.96682e+07	6.31964e+07	6.00891e+07	72938920	8.00179e+07	7.69283e+07	7.1084e+07	6.92524e+07	5.23985e+07	5.9795e+07	4.96381e+07	7.85044e+07	4.42503e+07	1.09945e+08	5.22069e+07	1.11626e+08	1.44466e+07	2.18382e+07	3.14916e+07	5.60665e+07	5.7269e+07	1.2671e+08	9.67076e+07	7.19136e+07	5.80539e+07	6.45486e+07	6.0817e+07	7.99682e+06	5.01695e+07	8.41268e+07	5.70965e+07	6.30001e+07	1.2243e+08	5.65528e+07	7.69778e+07	3.28912e+07	2.71512e+07	1.94053e+07	4.64871e+07	4.54514e+07
E5KSD5	Acyl-Coenzyme A dehydrogenase, C-2 to C-3 short chain	ACADS	ACADS	1.47834e+07	3.91187e+07	4.2238e+07	3.79057e+07	6.44733e+07	2.97039e+07	8.26884e+07	7.76148e+07	7.37926e+07	7.12214e+07	7.14128e+07	5.5879e+07	2.85148e+07	5.81441e+07	5.77115e+07	5.96886e+07	5.84276e+07	1.3259e+08	5.70507e+07	6.79988e+07	3.72978e+07	1.11818e+08	1.93747e+07	3.41675e+07	1.76333e+07	6.3478e+07	5.74321e+07	5.62742e+07	8.19014e+07	4.11569e+07	3.34905e+07	4.90106e+07	4.5699e+07	1.1585e+07	2.70826e+07	3.54745e+07	5.5087e+07	4.18954e+07	5.14384e+07	2.99909e+07	6.51424e+07	1.44314e+07	3.16539e+07	2.31064e+07	2.53026e+07	3.9102e+07
A0A0S2Z3P9	Acyl-CoA dehydrogenase short/branched chain isoform 1 (Fragment)	ACADSB	ACADSB	1.08656e+08	4.83156e+07	3.86665e+07	8.15077e+07	5.96223e+07	8.2393e+07	7.92404e+07	5.51563e+07	1.3939e+08	8.91692e+07	3.68151e+07	4.92587e+07	3.91353e+07	8.19117e+07	6.62433e+07	3.43586e+07	7.97318e+07	8.75605e+07	1.10292e+08	6.49043e+07	7.64069e+07	6.97622e+07	5.4187e+07	2.81635e+07	5.315e+07	6.05897e+07	4.94307e+07	6.45452e+07	6.79244e+07	4.57352e+07	1.10286e+08	7.09872e+07	2.77429e+07	2.59886e+08	1.23877e+08	5.14187e+07	3.22225e+07	5.02276e+07	9.91612e+07	4.24025e+07	6.2555e+07	7.04173e+07	7.25816e+07	5.96859e+07	8.57362e+07	4.66008e+07
P49748	Very long-chain specific acyl-CoA dehydrogenase, mitochondrial	ACADVL	ACADVL	8.07589e+07	9.72818e+07	88481006	1.82576e+08	9.39407e+07	1.19455e+08	1.35882e+08	1.18312e+08	8.21455e+07	1.44122e+08	7.48872e+07	7.55788e+07	9.13521e+07	100542228	8.89055e+07	1.22003e+08	1.31152e+08	1.34602e+08	1.02884e+08	1.58583e+08	1.77189e+08	1.62342e+08	5.09176e+07	9.76861e+07	1.10736e+08	1.21448e+08	1.5144e+08	100311246	1.86377e+08	5.92787e+07	6.56615e+07	114050792	1.10843e+08	7.66609e+07	1.17502e+08	1.1773e+08	1.14487e+08	1.10127e+08	169946049	7.87037e+07	1.52578e+08	9.0518e+07	9.29849e+07	109230509	1.69557e+08	9.21974e+07
A0A087X1T7	Aggrecan core protein	ACAN	ACAN	0	8.81154e+06	2.38767e+06	1.67243e+06	1.27888e+06	818476	2.90842e+06	582752	5.25396e+06	3.87407e+06	7.23464e+06	4.94198e+06	5.07358e+07	4.09243e+06	5.64038e+06	5.48219e+06	7.07377e+06	0	0	8.4278e+06	7.52817e+06	9.64834e+06	4.24847e+06	1.20825e+07	5.66231e+06	2.84937e+06	7.44321e+06	7.48113e+06	6.70483e+06	2.52779e+06	1.04868e+07	8.00032e+06	2.27589e+06	1.3459e+07	3.74514e+06	1.15758e+07	2.39197e+06	4.00014e+06	8.83337e+06	6.67648e+06	6.67404e+06	1.09882e+07	1.3796e+07	919843	1.08885e+07	2.88869e+08
Q15027	Arf-GAP with coiled-coil, ANK repeat and PH domain-containing protein 1	ACAP1	ACAP1	4.35921e+06	9.64844e+06	7.47746e+06	1.01956e+07	1.0918e+07	4.58251e+06	1.1565e+07	6.97876e+06	3.5943e+06	1.13236e+07	4.40625e+06	6.2971e+06	7.00716e+06	5.85973e+06	5.61065e+06	8.7206e+06	1.16106e+07	1.79825e+07	1.05042e+07	2.37109e+06	7.03047e+06	5.42929e+06	2.0304e+06	5.10675e+06	7.05663e+06	3.95262e+06	6.36319e+06	2.38172e+06	3.97726e+06	8.60926e+06	3.64639e+06	1.63513e+06	1.57306e+07	2.61352e+06	3.38072e+06	6.98344e+06	1.35451e+07	2.74834e+07	7.23435e+06	4.239e+06	9.70048e+06	0	578287	0	5.9245e+06	5.8248e+06
Q15057	Arf-GAP with coiled-coil, ANK repeat and PH domain-containing protein 2	ACAP2	ACAP2	1.25475e+07	1.21713e+07	1.49515e+07	2.10487e+07	1.56543e+07	2.25103e+07	7.87511e+06	1.04286e+07	6.20107e+06	4.84569e+06	1.12159e+07	1.38125e+07	1.52051e+07	1.23677e+07	2.06873e+07	2.31988e+07	1.73492e+07	1.41306e+07	1.1844e+07	8.36305e+06	1.98084e+07	1.26627e+07	1.6498e+07	1.96262e+07	1.35829e+07	2.21535e+07	1.9141e+07	2.06412e+07	2.42274e+07	8.93584e+06	7.76013e+06	2.31275e+07	3.41358e+07	5.9673e+06	2.17553e+07	2.00102e+07	2.2379e+07	1.98955e+07	1.47096e+07	1.78656e+07	2.89099e+07	1.48723e+07	3.8247e+06	7.11793e+06	1.28748e+07	9.22924e+06
P24752	Acetyl-CoA acetyltransferase, mitochondrial	ACAT1	ACAT1	1.93052e+07	1.11565e+07	2.48628e+07	2.76427e+07	4.90071e+06	2.50693e+07	1.86504e+07	2.258e+07	4.65275e+07	4.26422e+07	1.32583e+07	1.24973e+07	7.5073e+06	1.75344e+07	2.23039e+07	3.52257e+07	4.8269e+07	2.63005e+07	2.62577e+07	4.25574e+07	2.57432e+07	2.41507e+07	1.48603e+07	6.58965e+06	2.62086e+07	2.17443e+07	6.51681e+07	1.57322e+07	9.66741e+06	8.78113e+06	2.27528e+07	3.23457e+07	2.83134e+06	1.16313e+07	3.93894e+07	2.22714e+07	1.4466e+07	1.72874e+06	4.40221e+07	1.47052e+07	4.1664e+07	3.93404e+07	1.69088e+07	2.16833e+07	8.19209e+07	1.81184e+07
A0A5F9ZHJ0	Acetyl-CoA acetyltransferase, mitochondrial	ACAT1	ACAT1	0	0	0	0	0	0	0	0	0	0	0	0	1.02158e+06	0	0	0	0	0	0	0	0	0	0	0	0	0	0	0	0	0	0	0	0	1.82591e+06	2.51187e+06	0	0	0	0	0	0	0	0	0	0	0
Q9BWD1	Acetyl-CoA acetyltransferase, cytosolic	ACAT2	ACAT2	1.12464e+07	1.80928e+07	1.5414e+07	2.21272e+07	4.05093e+07	1.52002e+07	1.46229e+07	2.05589e+07	5.00829e+07	4.8129e+07	7.48777e+07	2.7628e+07	2.05909e+07	5.6372e+07	2.06385e+07	3.47993e+07	1.39058e+08	1.52913e+07	2.27709e+07	3.07579e+07	3.38955e+07	3.1243e+07	7.95717e+06	2.81976e+07	1.80988e+07	1.56646e+07	2.5661e+07	8.42235e+07	1.24018e+08	1.78552e+07	1.097e+07	2.77382e+07	2.78306e+07	1.86559e+06	1.58664e+07	5.20103e+07	9.5429e+06	1.88749e+07	5.61618e+07	1.30548e+07	3.10433e+07	1.97647e+07	2.90617e+07	1.93236e+07	2.5002e+07	3.4727e+07
A0A024R3P9	Acyl-Coenzyme A binding domain containing 3, isoform CRA_a	ACBD3	ACBD3	4.43529e+06	7.32613e+07	3.08088e+07	5.42595e+07	4.33071e+07	4.95822e+07	5.74623e+07	5.43242e+07	4.19688e+07	6.15818e+07	5.76209e+07	7.11277e+07	1.85996e+07	3.6921e+07	5.28278e+07	5.78317e+07	3.52135e+07	5.90806e+07	2.31633e+07	6.74905e+07	4.69937e+07	9.15088e+07	4.5065e+07	8.62651e+07	1.66144e+07	4.2547e+07	4.20184e+07	6.1496e+07	5.04672e+07	3.99288e+07	2.13694e+07	5.34091e+07	5.49444e+07	1.1466e+07	4.09569e+07	4.35945e+07	5.45638e+07	4.99238e+07	7.15257e+07	3.36161e+07	4.50761e+07	9.19864e+06	1.69532e+07	1.62837e+07	2.32769e+07	1.52416e+07
B7Z2R7	Acyl-CoA-binding domain-containing protein 5	ACBD5	KIAA1996;ACBD5	8.48168e+06	3.96992e+07	1.70331e+07	2.32938e+07	3.44494e+07	1.96109e+07	3.53216e+07	1.75785e+07	3.02447e+07	3.29681e+07	3.09708e+07	3.87708e+07	1.76086e+07	2.14926e+07	2.55162e+07	3.17356e+07	1.22002e+07	27471872	1.49139e+07	2.80287e+07	2.21142e+07	2.47043e+07	3.29847e+07	2.26238e+07	1.33591e+07	1.81883e+07	2.4885e+07	3.63368e+07	4.38052e+07	2.98788e+07	1.69665e+07	2.83757e+07	4.10901e+07	1.48355e+07	2.35557e+07	2.90835e+07	5.59685e+07	3.49518e+07	6.22491e+07	2.19794e+07	3.27686e+07	1.11211e+07	2.70238e+07	1.74162e+07	1.29327e+07	1.58977e+07
A0A024R949	Acyl-CoA-binding domain-containing protein 6	ACBD6	ACBD6	0	0	0	1.11612e+06	0	0	0	0	1.51142e+06	3.6491e+06	0	0	2.10539e+06	1.10164e+06	0	0	2.09891e+06	1.69481e+06	2.07063e+06	0	0	0	0	985648	0	1.78202e+06	1.0433e+06	972649	4.46414e+06	2.05924e+06	2.17649e+06	0	3.82395e+06	1.53186e+06	0	0	0	1.12869e+06	0	1.98096e+06	0	0	0	0	859700	0
P12821	Angiotensin-converting enzyme	ACE	ACE	322464299	2.16297e+08	4.80018e+08	358641612	3.15879e+08	295196575	2.78661e+08	3.01177e+08	2.27498e+08	2.49506e+08	202167799	2.21998e+08	2.30975e+08	3.11769e+08	2.8656e+08	2.09564e+08	3.08906e+08	3.58276e+08	2.92308e+08	2.23752e+08	3.16553e+08	2.09939e+08	2.27691e+08	1.55727e+08	3.87241e+08	3.19674e+08	4.89734e+08	2.36261e+08	2.01762e+08	229053724	2.39971e+08	2.29911e+08	2.01949e+08	2.17182e+08	2.77413e+08	188884281	1.87993e+08	1.46865e+08	2.4993e+08	2.36916e+08	2.49373e+08	2.31415e+08	2.5342e+08	3.35893e+08	2.72788e+08	1.83696e+08
S4R3H4	Apoptotic chromatin condensation inducer in the nucleus	ACIN1	ACIN1;DKFZp667N107	1.09118e+06	1.85072e+06	1.66034e+06	2.36224e+06	1.58662e+06	0	5.68057e+06	1.81003e+06	1.30131e+06	5.96776e+06	1.76064e+06	9.44365e+06	0	661042	4.48953e+06	7.68862e+06	0	2.56272e+06	0	5.78891e+06	4.23086e+06	5.02995e+06	2.74481e+06	1.47219e+06	0	1.57387e+06	0	4.04199e+06	1.68968e+07	4.80946e+06	1.33039e+06	2.24004e+06	3.65498e+06	0	1.18106e+06	1.15224e+06	3.25607e+06	4.94587e+06	4.43004e+06	1.89631e+06	2.57859e+06	1.12772e+06	0	1.11191e+06	1.99127e+06	924486
A0A024R1T9	ATP-citrate synthase	ACLY	ACLY	1.56226e+08	3.96602e+08	2.06315e+08	332102138	2.74153e+08	275239382	2.48996e+08	2.51569e+08	254080496	4.11066e+08	3.14411e+08	4.00097e+08	3.64627e+08	2.65292e+08	2.82278e+08	4.17471e+08	247762702	2.84965e+08	2.16205e+08	3.80071e+08	3.42222e+08	4.09723e+08	3.72383e+08	301413617	1.76433e+08	3.28351e+08	3.14665e+08	4.74226e+08	5.59655e+08	3.13185e+08	2.48396e+08	3.71444e+08	5.2243e+08	1.77152e+08	2.70172e+08	2.70924e+08	4.78688e+08	2.66309e+08	4.34871e+08	4.33252e+08	4.05811e+08	1.96063e+08	2.18462e+08	1.77631e+08	2.23109e+08	2.13151e+08
Q99798	Aconitate hydratase, mitochondrial	ACO2	ACO2;HEL-S-284;ACON	9.13585e+06	1.58596e+07	1.7454e+07	1.81626e+07	1.90011e+07	1.59746e+07	3.14587e+07	1.68668e+07	3.57971e+07	4.22048e+07	1.87243e+07	2.46834e+07	7.78972e+06	2.30068e+07	2.59958e+07	2.62919e+07	3.57427e+07	1.78067e+07	1.60232e+07	3.57174e+07	2.11214e+07	4.33132e+07	2.09173e+07	2.01289e+07	1.81462e+07	2.04982e+07	2.96447e+07	2.5656e+07	2.42128e+07	1.61534e+07	8.98183e+06	2.28718e+07	3.50255e+07	4.6888e+06	6.38121e+06	2.87741e+07	2.16361e+07	2.2664e+07	2.40094e+07	2.17591e+07	2.35331e+07	1.47527e+07	1.0515e+07	1.23371e+07	7.0341e+06	9.82822e+06
Q71UF1	Aconitate hydratase, mitochondrial	ACO2	ACO2;ACON;HEL-S-284	0	0	0	0	0	0	0	0	0	0	0	0	0	0	0	0	0	0	0	0	0	0	0	9.64023e+06	0	1.64516e+06	0	0	0	0	0	0	0	1.09096e+06	1.83092e+06	0	0	0	0	0	2.35556e+06	0	0	1.55638e+06	0	0
Q9NPJ3	Acyl-coenzyme A thioesterase 13	ACOT13	ACOT13	5.9222e+06	2.61547e+07	4.25942e+06	2.88063e+07	7.8377e+06	1.07493e+07	1.32435e+07	8.96175e+06	4.31583e+07	3.43228e+07	1.87677e+07	2.94677e+07	1.509e+07	2.24988e+07	1.29438e+07	1.9043e+07	1.63617e+07	3.81993e+07	1.70925e+07	5.36805e+07	2.33849e+07	25365543	1.9231e+07	3.76151e+07	7.52841e+06	1.06492e+07	9.46137e+06	2.75255e+07	2.69205e+07	1.68944e+07	1.11124e+07	2.55037e+07	3.63435e+07	2.65206e+06	7.6065e+06	1.5363e+07	2.06141e+07	8.83373e+06	5.13677e+07	2.60374e+07	4.49057e+07	8.71867e+06	1.08612e+07	7.71084e+06	2.53121e+07	6.79779e+06
A0A087X0W7	Acyl-coenzyme A thioesterase 2, mitochondrial	ACOT2	ACOT6;ACOT2;ACOT1	3.43881e+07	9.3567e+07	2.20353e+07	3.65411e+07	2.04098e+07	1.43527e+07	3.33014e+07	6.68987e+07	7.40584e+07	3.04583e+07	5.01769e+07	2.45583e+07	3.82099e+07	4.24911e+07	3.36833e+07	2.83993e+07	3.5194e+07	3.50641e+07	4.03695e+07	4.28632e+07	4.33966e+07	3.04388e+07	2.64869e+07	4.58701e+07	2.00432e+07	3.56033e+07	2.44579e+07	5.45549e+07	6.3398e+07	3.35255e+07	2.71545e+07	5.46156e+07	3.39268e+07	1.9039e+07	1.76323e+07	4.78257e+07	5.2861e+07	3.06928e+07	4.11228e+07	3.73629e+07	3.39845e+07	2.99752e+07	1.96212e+07	1.31156e+07	2.50867e+07	2.71952e+07
O00154	Cytosolic acyl coenzyme A thioester hydrolase	ACOT7	ACOT7	0	1.31598e+07	2.44534e+07	7.67395e+06	1.38365e+07	2.99113e+07	1.04377e+07	1.46727e+07	5.17173e+06	6.31424e+06	1.19998e+07	6.47982e+06	1.12734e+06	4.40024e+06	1.23111e+07	8.08169e+06	7.42779e+06	9.96729e+06	3.99732e+06	1.06474e+07	4.71876e+06	8.88814e+06	1.18821e+06	4.55069e+06	3.528e+06	8.26276e+06	7.67528e+06	6.89288e+06	2.41314e+07	1.6346e+07	1.01404e+06	1.14303e+07	7.15438e+06	6.51796e+06	8.17596e+06	7.06281e+06	1.06452e+07	6.54757e+06	1.17977e+07	2.98258e+06	8.38425e+06	2.21976e+06	1.22827e+06	3.0161e+06	0	2.61327e+06
Q9Y305	Acyl-coenzyme A thioesterase 9, mitochondrial	ACOT9	ACOT9	2.82953e+07	5.11541e+07	8.94607e+07	6.17027e+07	5.22838e+07	1.22275e+08	9.3491e+07	7.69762e+07	8.09526e+07	3.15877e+07	8.87125e+07	3.21771e+07	102928239	1.16158e+08	8.88806e+07	4.59505e+07	9.76313e+07	3.00894e+07	6.70014e+07	90312720	5.87715e+07	53374208	5.8276e+07	2.47038e+07	4.47199e+07	7.63924e+07	7.08334e+07	93129765	3.2463e+07	109605965	4.26236e+07	4.99086e+07	7.0275e+07	2.91549e+07	6.87157e+07	3.40688e+07	6.39707e+07	3.24829e+07	9.155e+07	4.19832e+07	8.3605e+07	4.21912e+07	9.87082e+06	7.66182e+07	3.95966e+07	6.09492e+07
Q15067	Peroxisomal acyl-coenzyme A oxidase 1	ACOX1	ACOX1	0	0	0	4.70025e+06	0	0	0	0	0	0	0	0	0	0	0	0	0	0	0	0	0	0	0	0	0	0	0	0	0	0	0	0	0	0	0	0	0	0	0	0	0	0	0	0	0	0
Q99424	Peroxisomal acyl-coenzyme A oxidase 2	ACOX2	ACOX2	4.16662e+06	2.02906e+06	0	0	837228	0	0	8.04586e+06	0	964231	675106	0	3.52873e+06	0	766374	1.57212e+06	658128	1.00117e+07	0	0	0	616740	0	2.00266e+06	0	0	700266	702514	7.35871e+06	0	2.30325e+06	0	0	6.65765e+06	0	1.17521e+06	0	0	2.60849e+06	0	785182	0	3.38813e+06	0	5.34185e+06	895281
O15254	Peroxisomal acyl-coenzyme A oxidase 3	ACOX3	ACOX3	1525424120	1599725124	1724789039	1312887849	1749353197	1665457449	1745017120	1296727771	1574126333	1499645068	1939764988	2193978652	2031320894	1299130414	2074914751	1678552108	1821040440	9.85414e+08	2197917686	1439101723	2070974657	1686490755	1529590525	1760596785	1564303957	1464708774	1308391594	2307248591	1120400737	1857807032	2392887101	1973506274	1230065300	2621300765	1760000859	2342611742	1886077767	2353767049	1292741042	2348026158	1930878023	2414965201	2840108450	2474683856	2613986225	2384563210
D3YTI2	Acid phosphatase	ACP1	ACP1	0	0	0	0	0	0	0	0	0	0	0	0	0	0	0	0	0	0	0	0	0	615915	0	1.05782e+06	0	0	0	0	2.38795e+06	0	0	0	0	0	0	0	0	0	0	0	1.36974e+06	0	0	0	0	0
A0A5F9ZHR7	Lysosomal acid phosphatase	ACP2	ACP2	8.19603e+06	7.05946e+06	1.42734e+07	2.09027e+07	1.18679e+07	1.3044e+07	1.1406e+07	2.16696e+07	1.43971e+07	1.60543e+07	2.14739e+07	1.73518e+07	5.36811e+06	1.03016e+07	2.10083e+07	1.82288e+07	1.81862e+07	1.45697e+07	1.09432e+07	2.91606e+07	2.7514e+07	3.57384e+07	4.10106e+07	1.65873e+07	1.13244e+07	1.31491e+07	1.8397e+07	1.1953e+07	2.46168e+07	1.96518e+07	1.74346e+07	3.78207e+07	8.38849e+06	1.7298e+07	1.31879e+07	1.20616e+07	2.43018e+07	2.19148e+07	2.11237e+07	1.49176e+07	1.46352e+07	5.99631e+06	1.60662e+07	9.54666e+06	1.57961e+07	9.85712e+06
P15309	Prostatic acid phosphatase	ACP3	ACPP;ACP3	0	0	0	5.10168e+06	0	0	674657	0	0	1.06039e+06	2.12751e+06	8.57005e+06	1.2264e+07	0	2.03844e+07	8.33652e+06	1.81456e+06	2.057e+07	1.92114e+07	819680	0	1.97494e+06	0	2.46345e+06	291938	0	1.87166e+07	1.10319e+06	4.23218e+06	0	9.93594e+06	1.69607e+06	1.63735e+06	0	0	843798	0	0	0	1.01885e+06	305291	425892	0	0	0	552510
P13686	Tartrate-resistant acid phosphatase type 5	ACP5	ACP5	5.08684e+07	7.75124e+07	4.45411e+07	6.71266e+07	5.3637e+07	5.57659e+07	6.44128e+07	8.56377e+07	3.74167e+07	5.56837e+07	1.64757e+08	4.22456e+07	2.51371e+08	6.22607e+07	9.02763e+07	8.25626e+07	2.96747e+07	3.87629e+07	5.39737e+07	5.99634e+07	7.80097e+07	6.48618e+07	3.91795e+07	2.68751e+07	3.6996e+07	4.27712e+07	9.76772e+07	1.20722e+08	4.27331e+07	8.16032e+07	9.73711e+07	5.05257e+07	9.88247e+07	5.21167e+07	7.42239e+07	1.4689e+08	1.9926e+08	1.08174e+08	4.955e+07	1.98642e+08	1.87097e+08	5.01233e+07	7.40962e+07	6.60164e+07	3.20041e+07	1.03609e+08
Q9NPH0	Lysophosphatidic acid phosphatase type 6	ACP6	ACP6	0	2.87154e+06	3.27004e+06	4.19393e+06	2.1581e+06	0	8.29435e+06	9.73001e+06	6.95895e+06	1.12783e+07	7.34975e+06	9.97407e+06	0	1.17856e+07	1.26119e+07	8.34966e+06	3.42478e+06	5.16363e+06	9.42827e+06	5.18095e+06	7.18149e+06	8.29854e+06	3.77867e+06	5.1701e+06	1.26833e+06	8.45103e+06	7.71312e+06	4.11663e+06	7.22334e+06	7.13181e+06	2.92022e+06	4.26683e+06	3.64288e+06	2.43262e+06	2.93167e+06	2.06652e+06	8.01723e+06	6.09756e+06	7.73915e+06	3.01585e+06	4.50147e+06	2.71054e+06	2.66405e+06	4.46152e+06	5.92431e+06	7.60463e+06
Q96CM8	Medium-chain acyl-CoA ligase ACSF2, mitochondrial	ACSF2	ACSF2	4.2805e+07	9.22197e+07	1.07314e+08	1.60488e+08	8.8193e+07	1.17369e+08	1.27584e+08	6.71083e+07	1.73509e+08	6.84267e+07	8.47488e+07	7.30414e+07	6.24292e+07	7.48084e+07	9.09159e+07	9.73668e+07	7.58077e+07	9.46925e+07	1.17165e+08	1.33872e+08	1.0924e+08	6.89065e+07	5.77466e+07	7.0589e+07	9.63406e+07	1.01306e+08	1.30673e+08	123436856	1.06447e+08	8.32195e+07	7.87795e+07	9.72525e+07	1.41336e+08	5.38807e+07	6.8152e+07	5.74262e+07	4.83918e+07	7.04575e+07	1.00763e+08	6.72897e+07	1.15546e+08	6.11216e+07	2.23608e+07	5.84314e+07	6.08057e+07	7.00187e+07
Q4G176	Malonate--CoA ligase ACSF3, mitochondrial	ACSF3	ACSF3	0	6.37121e+06	5.90472e+06	1.25629e+07	9.64038e+06	0	1.49839e+07	4.15247e+06	7.6468e+06	3.53557e+06	8.7404e+06	1.06259e+06	0	3.77834e+06	6.04642e+06	4.67375e+06	6.0261e+06	1.32118e+07	3.75791e+06	7351939	7.2568e+06	8.35779e+06	3.37679e+06	7.59221e+06	1.3119e+06	6.08496e+06	7.88717e+06	7.89821e+06	1.16641e+07	3.424e+06	0	5.08126e+06	0	2.56191e+06	0	8.76281e+06	6.73627e+06	7.44268e+06	0	1.54252e+06	1.6593e+06	0	0	0	675614	0
O60488	Long-chain-fatty-acid--CoA ligase 4	ACSL4	ACSL3;ACSL4;FACL4	1.85824e+07	1.06329e+08	1.2548e+08	1.32093e+08	1.20814e+08	1.32649e+08	8.02789e+07	7.81171e+07	1.10416e+08	8.81143e+07	114223499	5.82376e+07	8.76969e+07	114697093	8.92188e+07	9.1193e+07	5.60447e+07	6.9253e+07	101021349	1.29955e+08	1.34991e+08	1.1038e+08	7.00802e+07	5.96996e+07	9.06577e+07	1.08327e+08	1.28421e+08	3.7229e+07	7.22929e+07	7.59471e+07	4.3876e+07	8.91121e+07	7.38147e+07	2.73881e+07	4.61959e+07	6.57416e+07	8.46419e+07	1.20321e+08	4.94815e+07	6.12187e+07	7.0002e+07	4.26523e+07	3.80176e+07	7.0333e+07	3.53073e+07	5.93583e+07
Q9ULC5	Long-chain-fatty-acid--CoA ligase 5	ACSL5	ACSL1;ACSL6;ACSL5	2.44516e+08	9.48458e+07	1.90206e+08	2.97978e+08	1.62248e+08	6.71419e+07	2.13209e+08	2.27112e+08	2.25332e+08	2.93017e+08	3.00327e+08	1.6475e+08	8.76267e+07	3.86783e+08	1.84363e+08	1.35299e+08	1.66799e+08	1.81298e+08	1.24076e+08	2.68362e+08	181821244	150603452	1.92781e+08	6.72393e+07	189397919	2.21545e+08	1.57778e+08	1.38078e+08	194546040	1.19707e+08	1.91859e+08	1.0665e+08	4.55419e+07	7.27919e+07	1.83227e+08	120284423	1.01207e+08	5.35349e+07	8.81786e+07	1.15299e+08	1.54821e+08	1.01457e+08	7.99906e+07	7.33237e+07	1.34853e+08	113827942
Q53FZ2	Acyl-coenzyme A synthetase ACSM3, mitochondrial	ACSM3	ACSM3;SA;ACSM4	6.64261e+06	2.85688e+07	1.40172e+06	1.76197e+07	2.16237e+07	3.68343e+06	3.11223e+07	1.65572e+06	5.94879e+07	3.49325e+07	4.59052e+07	3.63845e+07	1.07481e+07	1.42324e+07	3.89934e+07	3.03843e+07	1.98952e+07	1.88764e+06	2.09981e+06	39251462	2.55198e+07	2.76713e+07	9.1696e+06	2.17074e+07	6.94789e+06	2.97458e+07	2.43331e+07	2.67893e+07	2.45076e+07	1.62578e+07	1.24745e+07	4.81767e+07	2.49449e+07	1.11643e+07	1.71552e+07	1.9211e+07	2.52149e+07	2.69768e+07	2.72318e+07	1.39847e+07	2.04246e+07	8.58967e+06	1.87559e+07	3.18707e+07	2.59549e+07	1.33665e+07
Q9NUB1	Acetyl-coenzyme A synthetase 2-like, mitochondrial	ACSS1	FLJ00013;DKFZp666B209;ACSS1;DKFZp666G0810	1.14418e+07	1.23374e+07	1.21918e+07	4.69977e+07	2.46527e+07	1.50127e+07	3.60659e+07	2.43782e+07	34788252	2.90713e+07	3.08393e+07	1.98298e+07	1.11636e+07	3.19703e+07	2.80811e+07	3.72637e+07	4.18418e+07	4.21128e+07	2.34818e+07	4.46114e+07	3.06654e+07	3.56553e+07	9.6037e+06	3.49388e+07	8.38775e+06	32092866	3.14965e+07	5.90906e+07	6.65397e+07	1.92522e+07	3.66523e+07	3.40691e+07	4.67682e+07	1.86521e+07	2.56767e+07	1.85876e+07	3.47509e+07	1.45913e+07	2.59391e+07	1.55468e+07	5.1228e+07	1.29669e+07	1.85436e+06	4.92852e+06	6.71781e+06	1.54231e+07
Q6DKJ3	Acetyl-coenzyme A synthetase (Fragment)	ACSS2	ACSS2;DKFZp762G026	3.70818e+07	5.06138e+07	9.35295e+07	7.25379e+07	7.03552e+07	9.49033e+07	74778645	5.43104e+07	5.44449e+07	5.19458e+07	1.4128e+08	4.28165e+07	1.08254e+08	1.07117e+08	6.74962e+07	7.50635e+07	5.25794e+07	5.49626e+07	9.45989e+07	8.07654e+07	7.08622e+07	7.97921e+07	6.23219e+07	5.40134e+07	6.18535e+07	8.26752e+07	1.04844e+08	6.41671e+07	4.14057e+07	6.29204e+07	4.55578e+07	4.11413e+07	5.20078e+07	3.71454e+07	6.14692e+07	3.63478e+07	3.53247e+07	4.06856e+07	3.07793e+07	4.72325e+07	5.06837e+07	7.48209e+07	3.01653e+07	7.26648e+07	6.58055e+07	5.27321e+07
A0A0B4J1R2	Propionate--CoA ligase	ACSS3	ACSS3	0	6.91367e+06	4.70242e+06	3.63366e+06	5.96319e+06	4.44043e+06	7.59802e+06	2.08017e+06	1.61509e+06	1.09568e+07	4.91914e+07	6.60504e+06	1.65834e+07	8.91408e+06	3.64102e+06	6.36867e+06	2.51807e+06	3.29354e+06	1.97877e+06	4.0691e+07	6.36751e+06	9.20633e+06	1.08056e+07	1.38426e+07	2.37933e+06	1.28319e+07	1.96045e+07	7.61272e+06	1.36303e+07	8.62197e+06	6.91512e+06	6.74746e+06	1.51569e+07	2.22042e+06	9.96452e+06	6.67504e+06	9.51863e+06	4.58947e+06	1.74473e+07	8.57745e+06	2.08747e+07	6.99645e+06	1.16432e+06	2.84564e+06	0	4.00862e+06
Q562Z4	Actin-like protein (Fragment)	ACT	ACTB;ACTG1;ACT	9.57151e+07	5.47593e+07	8.00458e+07	4.1338e+07	3.09916e+07	4.16641e+07	2.86319e+07	7.63997e+07	575081532	1.34302e+08	5.86269e+07	8.34973e+07	4.44559e+08	9.39185e+07	7.54867e+07	1.54943e+08	3.33523e+07	1.02332e+08	8.1252e+07	3.39578e+07	3.20467e+07	2.07875e+07	2.95905e+07	5.5945e+07	6.96768e+07	3.43344e+07	4.31111e+07	8.08744e+07	7.71318e+07	3.2108e+07	3.66457e+07	686252830	7.64481e+07	3.13748e+07	3.47124e+07	3.88965e+07	8.41177e+07	4.10009e+07	9.57508e+07	2.67998e+07	7.05921e+07	2.90801e+08	1.30724e+08	3.30523e+08	9.9738e+07	2.98164e+07
Q562R0	Actin-like protein (Fragment)	ACT	ACTA1;POTEKP;ACTC1;POTEM;POTEJ;POTEI;ACT;POTEF;ACTB;POTEE;ACTG1	3.08171e+06	0	0	0	603945	1.0228e+07	0	2.49313e+06	3.40576e+06	0	0	0	0	5.21205e+06	798497	1.04938e+06	1.13294e+06	2.47773e+06	2.14867e+06	0	1.63794e+06	0	959392	1.68973e+06	768757	0	752549	0	0	0	1.97635e+06	916661	0	4.27667e+06	2.73448e+06	1.03678e+06	0	0	0	0	0	1.57078e+06	0	1.35471e+06	1.5733e+06	1.78908e+06
Q562M3	Actin-like protein (Fragment)	ACT	ACTA1;POTEKP;ACTC1;POTEM;POTEJ;POTEI;ACT;POTEF;ACTB;POTEE;ACTG1	1213594747	1911452402	4.69833e+06	1049046559	3.72438e+06	1264257548	1.15964e+07	1.32356e+06	4789659	6.76079e+06	2.93549e+07	5.43188e+06	2.7611e+06	1577422441	1730112431	6.03945e+06	1292873203	5.84839e+06	1788747779	7.18213e+06	1717747486	7.65636e+06	5.50332e+06	5.2264e+06	4.0436e+06	4.79342e+06	6.07884e+06	6.75583e+06	9.1231e+06	1803055683	1316421750	7.76837e+06	1673853720	1.83382e+06	4.53002e+06	6.89091e+06	1820475293	1870730028	7.209e+06	2877316640	1719700253	2007819253	2.56894e+06	1621319413	1221877961	3.75914e+06
Q562L9	Actin-like protein (Fragment)	ACT	ACTB;ACTG1;ACT	3.26633e+06	8.68273e+06	3.54082e+06	5.57065e+06	4.49663e+06	4.10482e+06	6.10723e+06	3.47969e+06	4.52817e+06	1.09479e+07	8.41809e+06	4.16545e+06	6.05538e+06	9.06046e+06	6.1356e+06	5.48068e+06	5.1627e+06	8.89314e+06	4.87406e+06	8868722	5.60835e+06	5.38454e+06	9.09898e+06	4.01614e+06	5.76174e+06	5.98822e+06	9.21417e+06	5.67726e+06	6.31565e+06	6.92197e+06	4.307e+06	6.70435e+06	7.51466e+06	3.40883e+06	4.22532e+06	4.95971e+06	7.90077e+06	6.49412e+06	1.38373e+07	8.65209e+06	4.40851e+06	3.89244e+06	6.24219e+06	4.10713e+06	3.06834e+06	3.81274e+06
Q562W2	Actin-like protein (Fragment)	ACT	ACTA1;POTEKP;ACTC1;POTEM;POTEJ;POTEI;ACT;POTEF;ACTB;POTEE;ACTG1	0	0	0	0	0	0	0	0	0	0	0	0	0	0	0	0	0	0	0	0	0	0	0	0	0	0	0	1.35037e+06	0	0	0	0	0	0	0	0	0	0	0	0	679596	660983	0	0	0	0
Q562V5	Actin-like protein (Fragment)	ACT	ACTB;ACTG1;ACT	1.00469e+07	1.75211e+07	0	3.96582e+06	0	3.11752e+06	923712	5.30547e+06	5.42956e+07	9.42484e+06	8.67733e+06	9.27783e+06	4.57665e+06	1.43379e+07	2.00801e+07	1.12996e+07	3.23959e+07	4.35879e+07	4.48187e+07	4.99614e+06	6.0239e+06	4.00084e+06	5.13168e+06	0	6.0541e+06	2.10708e+06	1.17822e+07	2.6921e+07	1.80581e+07	3.26241e+06	6.99831e+07	2.11943e+07	1.28233e+06	1.11498e+08	5.2706e+07	2.00584e+07	1.69907e+07	3.48032e+06	1.66265e+07	2.86249e+07	1.19104e+07	2.60532e+07	2.6425e+07	1.19504e+07	1.28103e+08	5.73755e+07
P68133	Actin, alpha skeletal muscle	ACTA1	ACTA2;ACTA1;POTEKP;ACTG2;ACTC1;ACTBL2;POTEM;HEL-176;POTEJ;POTEI;ACT;POTEF;ACTB;POTEE;ACTG1	0	0	0	0	0	0	0	0	0	0	0	0	870191	0	0	888452	0	0	0	1.38649e+06	0	1.30905e+06	0	0	0	0	0	883298	0	0	0	0	842576	0	1.40395e+06	0	0	1.87552e+06	0	0	0	0	0	0	0	0
D2JYH4	Actin, alpha 2, smooth muscle, aorta	ACTA2	ACTA2;POTEF;ACTA1;ACTG1;ACTG2;POTEI;ACTC1;POTEM;POTEJ;ACTBL2;ACT;HEL-176;ACTB;POTEE;POTEKP	0	3.26297e+06	6.9316e+06	9.39723e+06	6.92355e+06	7.46742e+06	8.45728e+06	5.55895e+06	5.77401e+06	6.4611e+06	4.23949e+06	1.15629e+07	1.45412e+06	7.96086e+06	6.41725e+06	5.98708e+06	4.0408e+06	2.96707e+06	2.78644e+06	0	0	0	0	3.45716e+06	3.43299e+06	5.62262e+06	5.2926e+06	0	9.97129e+06	2.3547e+06	0	4.65066e+06	3.49531e+06	0	3.41029e+06	0	3.75954e+06	2.34284e+06	1.59066e+06	0	0	0	0	0	0	2.80381e+06
A0A510GJR4	Beta-actin (Fragment)	ACTB	ACTB	0	0	0	0	0	0	0	0	0	0	0	0	207734	0	153230	0	73111.9	0	0	0	0	0	9.33456e+06	0	0	0	0	0	0	0	0	0	0	0	0	0	141309	0	0	0	0	140514	0	0	263827	0
A0A2R8YGF8	Actin, cytoplasmic 1 (Fragment)	ACTB	ACTA2;ACTA1;ACTG1;ACTG2;POTEI;ACTC1;POTEM;POTEJ;ACTBL2;ACT;POTEF;ACTB;POTEE;POTEKP	1.31246e+06	2.35347e+06	0	1.07083e+06	1.63483e+06	1.17268e+06	0	0	1.78381e+06	1.42329e+06	844726	0	0	0	1.34026e+06	1.25029e+06	0	2.59489e+06	0	1.62448e+06	1.48373e+06	1.5995e+06	4.42373e+06	0	1.15212e+06	1.46829e+06	0	0	0	0	1.3758e+06	1.79811e+06	1.70945e+06	2.22747e+06	2.88704e+06	0	0	1.56202e+06	0	0	1.96468e+06	0	3.8543e+06	0	0	0
A0A6Q8PFE4	Actin, cytoplasmic 1	ACTB	ACTA2;ACTA1;ACTG1;ACTBL2;ACTC1;ACT;POTEM;POTEJ;POTEI;POTEF;HEL-176;ACTB;POTEE;ACTG2;POTEKP	2.04245e+06	2.84184e+06	5.07665e+06	8.83546e+06	2.77234e+06	9.11833e+06	1.388e+07	1.15606e+07	1.01472e+06	4.88689e+06	0	0	0	3.10509e+06	0	734666	0	0	0	1.42086e+07	8.7867e+06	1.13677e+07	1.69613e+07	0	1.47788e+07	2.01494e+07	6.13964e+06	1.53346e+06	0	0	0	3.95238e+06	0	0	0	0	0	0	1.65104e+06	0	6.40814e+06	5.07305e+06	6.78327e+06	0	0	0
A0A2R8YEA7	Actin, cytoplasmic 1 (Fragment)	ACTB	ACTA2;ACTA1;ACTG1;ACTG2;ACTC1;ACT;ACTBL2;POTEF;HEL-176;ACTB;POTEE;POTEKP	0	0	0	0	0	0	0	0	0	0	0	0	0	0	0	0	0	0	0	0	0	2.71595e+06	0	0	0	1.02285e+06	0	0	0	0	0	0	0	0	9.73073e+06	0	0	0	0	0	0	0	0	0	0	0
Q562R1	Beta-actin-like protein 2	ACTBL2	ACTA2;ACTA1;ACTG1;ACTG2;ACTC1;ACTBL2;POTEF;HEL-176;ACTB;POTEE;POTEKP	2.32946e+08	1.05638e+08	1452474965	1.06788e+08	1241423579	1.29406e+08	1916881845	1158775610	1723697327	1935945416	1600674398	1776606260	1836844949	1.31269e+08	1.4175e+08	1950043198	1.1072e+08	2086697404	1.36648e+08	1302240213	1.56103e+08	1620135276	1454438316	1392317345	1528844525	1429011660	1696485822	1939532392	1863140797	1.2789e+08	1.28278e+08	1908150591	9.91549e+07	1469464384	1821018435	1938828219	8.22781e+07	1.06202e+08	2303475079	1.14176e+08	8.77045e+07	1.32092e+08	1599097565	9.45237e+07	6.66326e+07	1603336785
A0A173GMX0	Actin alpha cardiac muscle 1 (Fragment)	ACTC1	ACTA2;ACTA1;POTEKP;ACTG2;ACTC1;ACTBL2;POTEF;HEL-176;ACTB;POTEE;ACTG1	0	0	0	0	0	0	0	0	0	0	0	0	0	0	0	2.71811e+06	0	0	0	0	0	0	0	0	0	0	0	1.52116e+06	0	0	0	0	0	1.40471e+06	0	2.31999e+06	0	0	0	0	0	0	0	0	0	0
K7EM38	Actin, cytoplasmic 2 (Fragment)	ACTG1	ACTA2;ACTA1;ACTG1;ACTG2;ACTC1;ACTBL2;POTEM;POTEJ;POTEI;ACT;POTEF;ACTB;POTEE;POTEKP	1.26804e+07	4.76691e+07	1.8743e+07	2.42697e+07	45689727	4.59061e+07	7.45286e+07	6.83231e+07	9.33546e+06	8.20793e+07	6.00347e+07	3.76944e+07	2.82642e+06	5.20618e+07	6.81462e+07	5.44467e+07	8.80744e+06	8.16408e+06	2.1673e+06	6.57067e+07	8.61431e+07	7.95712e+07	1.99829e+07	2.87695e+07	5.84149e+06	8.43105e+07	2.7097e+07	5.79844e+07	6.04291e+06	3.25296e+07	1.82287e+06	3.77705e+06	6.4601e+06	2.84839e+07	1.16654e+07	195777	5.0582e+07	4.41782e+07	1.56771e+07	4.57866e+06	5.07421e+06	3.63566e+07	2.51312e+07	0	4.17844e+06	1.26441e+06
A0A024R694	Actinin, alpha 1, isoform CRA_a	ACTN1	ACTN3;ACTN2;ACTN1;ACTN4;MLL-ACTN4;ACTN4-MLL	1.55587e+07	5.27178e+07	2.91818e+07	3.61081e+07	3.08141e+07	2.21921e+07	4.39489e+07	3.22553e+07	1.53816e+07	41356265	4.72106e+07	3.72146e+07	4.43098e+07	3.26753e+07	2.89027e+07	2.60657e+07	2.12249e+07	2.23313e+07	2.7461e+07	4.02823e+07	2.72862e+07	3.68499e+07	4.02385e+07	4.57063e+07	1.53105e+07	4.37983e+07	4.11267e+07	2.93129e+07	3.40898e+07	3.85033e+07	2.30429e+07	2.86607e+07	4.27293e+07	1.62782e+07	2.73943e+07	3.87124e+07	5.04248e+07	107511379	4.03473e+07	4.08791e+07	3.91754e+07	1.85469e+07	2.15032e+07	2.56084e+07	1.25212e+07	2.56686e+07
H9KV75	Alpha-actinin-1	ACTN1	ACTN3;ACTN2;ACTN1;ACTN4	1.53357e+06	0	9.90515e+06	8.43426e+06	1.17778e+07	1.03369e+07	5.33136e+06	2.9986e+06	6.62751e+06	6.64913e+06	7.34441e+06	5.9963e+06	8.49919e+06	1.13827e+07	6.26993e+06	4.27831e+06	3.58672e+06	0	6.37432e+06	5827940	9.76057e+06	7.37171e+06	2.1081e+06	0	6.93825e+06	1.29979e+07	1.164e+07	3.84563e+06	1.22012e+06	4.97246e+06	0	0	0	0	0	702886	0	0	591466	562152	0	2.58744e+06	944915	0	0	3.83801e+06
A0A0S2Z3G9	Actinin alpha 4 isoform 1 (Fragment)	ACTN4	ACTN3;ACTN2;ACTN1;ACTN4;MLL-ACTN4;SPTBN4;ACTN4-MLL	5.16972e+08	998840994	9.13229e+08	9.59399e+08	8.87933e+08	8.38266e+08	8.8526e+08	7.29361e+08	7.82589e+08	8.3566e+08	8.20498e+08	7.68291e+08	6.98971e+08	9.71201e+08	7.36908e+08	8.44173e+08	6.69315e+08	1406372966	7.70753e+08	1015331933	9.06858e+08	7.62666e+08	8.97202e+08	7.54145e+08	1073922417	1017957853	1360904996	1079279962	7.4383e+08	7.30646e+08	4.71553e+08	8.0752e+08	9.59529e+08	472197128	6.09817e+08	5.31612e+08	6.33015e+08	6.68721e+08	8.84746e+08	592779712	8.45663e+08	6.46098e+08	3.83995e+08	5.98508e+08	5.82599e+08	5.32763e+08
Q9NZ32	Actin-related protein 10	ACTR10	ACTR10	0	0	5.93858e+06	5.27437e+06	5.28735e+06	8.19038e+06	6.61873e+06	8.79692e+06	0	6.65506e+06	1.20981e+06	6.16033e+06	0	5.77101e+06	3.24247e+06	4.25539e+06	4.88328e+06	8.70112e+06	1.75237e+06	5.563e+06	2.21397e+06	3.16508e+06	3.28895e+06	0	3.82529e+06	3.04742e+06	9.42748e+06	1.82817e+06	0	0	1.12526e+06	1.61104e+06	909447	0	1.15284e+06	1.52741e+06	0	959777	0	742278	1.55854e+06	1.3019e+06	1.30509e+06	0	0	0
P61163	Alpha-centractin	ACTR1A	ACTR1B;ACTR1A	3.31471e+07	7.72511e+07	7.8863e+07	9.18272e+07	9.03521e+07	4.59614e+07	8.67554e+07	6.3409e+07	4.8404e+07	8.06515e+07	5.96211e+07	6.06903e+07	6.66866e+07	7.8909e+07	6.64267e+07	8.73972e+07	6.49763e+07	5.97839e+07	6.62817e+07	1.64665e+08	9.64058e+07	9.04599e+07	8.46563e+07	4.38042e+07	7.47597e+07	9.6821e+07	9.75463e+07	8.93195e+07	9.79872e+07	9.7579e+07	5.44178e+07	4.78873e+07	9.96777e+07	4.5931e+07	5.42661e+07	6.68334e+07	6.75539e+07	6.39742e+07	1.52609e+08	6.37641e+07	5.52481e+07	4.21578e+07	3.43021e+07	5.15904e+07	4.68346e+07	4.83971e+07
P42025	Beta-centractin	ACTR1B	ACTR1B;ACTR1A	4.31202e+06	1.17881e+07	2.23721e+07	3.84865e+07	4.27654e+07	3.7217e+07	1.34767e+07	2.38127e+07	1.92018e+07	2.07179e+07	1.74123e+07	1.91511e+07	1.20684e+07	2.77929e+07	1.5237e+07	3.928e+07	1.99611e+07	3.37256e+07	3.37341e+07	1.59004e+07	2.91481e+07	2.58005e+07	9.9715e+06	4.65194e+07	2.5724e+07	2.74685e+07	3.48525e+07	1.03346e+07	2.30544e+07	4.05352e+06	9.6708e+06	2.31246e+07	3.28836e+07	7.7753e+06	2.43752e+07	7.88509e+06	2.78624e+07	1.99954e+07	1.60897e+07	2.73954e+07	1.49341e+07	1.06438e+07	1.65034e+07	1.51369e+07	8.44901e+06	1.47218e+07
P61160	Actin-related protein 2	ACTR2	ACTR2	5.85658e+07	9.09739e+07	4.35715e+07	8.01846e+07	8.22445e+07	5.48443e+07	127163602	7.85052e+07	7.70284e+07	1.20037e+08	1.32969e+08	1.12779e+08	7.00959e+07	1.05725e+08	9.01479e+07	1.2903e+08	6.60029e+07	9.41681e+07	7.00676e+07	1.25846e+08	9.06767e+07	9.07348e+07	6.71432e+07	6.7575e+07	5.1375e+07	5.7847e+07	7.40991e+07	9.40819e+07	1.1096e+08	9.52281e+07	6.01529e+07	1.12564e+08	101545903	4.66327e+07	8.55257e+07	8.41142e+07	1.40141e+08	9.51186e+07	1.74203e+08	9.93511e+07	1.04983e+08	6.75739e+07	6.78668e+07	5.97621e+07	4.17745e+07	5.78399e+07
A0A024RAI1	Actin-like protein 3	ACTR3	ACTR3;ACTR3C;ACTR3B	2.61662e+08	3.45057e+08	206670348	3.37351e+08	3.39282e+08	2.68223e+08	4.39138e+08	3.23429e+08	373341400	4.51738e+08	4.70554e+08	4.77689e+08	262495552	3.86169e+08	4.76091e+08	491066869	2.78007e+08	4.39653e+08	2.57187e+08	5.57985e+08	4.15765e+08	4.38702e+08	4.6148e+08	2.95871e+08	3.10067e+08	3.38783e+08	3.18765e+08	3.91457e+08	4.40047e+08	3.4043e+08	3.52153e+08	4.19801e+08	4.21422e+08	3.08398e+08	3.54976e+08	296571368	4.37884e+08	5.00721e+08	5.81647e+08	3.51796e+08	409349693	2.60187e+08	2.53276e+08	2.47361e+08	2.43167e+08	2.39478e+08
G3V2U7	Acylphosphatase	ACYP1	ACYP1	0	2.75693e+06	0	1.23532e+06	1.86234e+06	0	945696	1.00383e+06	0	2.88492e+06	785539	0	4.40003e+06	0	0	959971	771732	958373	1.10178e+06	443544	1.58144e+06	0	0	1.18565e+06	0	0	0	4.22655e+06	3.47041e+07	2.13947e+06	1.93256e+06	0	5.41294e+06	1.69803e+06	2.27861e+06	0	1.7328e+06	3.16113e+06	5.71004e+06	3.48345e+06	758524	1.15563e+06	1.34076e+06	2.59035e+06	0	0
P14621	Acylphosphatase-2	ACYP2	ACYP2	2.648e+06	2.36841e+06	1.93019e+06	3.03072e+06	2.37612e+06	3.01786e+06	2.21031e+06	3.04867e+06	3.48228e+06	2.69847e+06	3.07336e+06	3.89896e+06	0	2.14873e+06	2.04174e+06	881918	1.08272e+06	3.39895e+06	2.45459e+06	4.36509e+06	4.31115e+06	3.49413e+06	1.92826e+06	1.14412e+06	1.83831e+06	1.62688e+06	2.24002e+06	3.18333e+06	2.25733e+06	3.33221e+06	0	766937	808537	2.62614e+06	3.05708e+06	803580	1.56151e+06	2.0199e+06	9.11607e+06	656531	753882	978971	1.58294e+06	0	2.95174e+06	699165
A0A0S2Z381	Adenosine aminohydrolase (Fragment)	ADA	ADA	3.58084e+07	1.07933e+07	1.69402e+06	6.37342e+06	6.46287e+06	3.46499e+06	1.20575e+07	1.10716e+07	2.69237e+07	1.61321e+07	3.36305e+06	1.76044e+07	1.77941e+07	2.71951e+06	2.13671e+07	9.45401e+06	22301610	2.89307e+07	2.19798e+07	1.66668e+07	2.7828e+06	1.53856e+07	8.51304e+06	3.7548e+07	5.21759e+06	4.36763e+06	4.33138e+06	2.8759e+07	1.95556e+07	3.04625e+07	5.31175e+07	1.35642e+07	1.41946e+07	69990582	2.50997e+07	1.70582e+07	1.05195e+07	1.74892e+07	2.55701e+07	2.13552e+07	1.31673e+07	1.04524e+07	9.82953e+06	1.47885e+07	5.44483e+06	3.44711e+07
B4E3Q4	Adenosine deaminase	ADA2	ADA2	1.07885e+06	3.63405e+07	2.53353e+07	5.55906e+07	3.94008e+07	1.13881e+07	4.58512e+07	3.5858e+07	5.39983e+07	4.77024e+07	4.70865e+07	5.39374e+07	5.48222e+06	4.94782e+07	5.85671e+07	6.19679e+07	3.00215e+07	1.11268e+08	3.4581e+07	5.84894e+07	5.37046e+07	6.5376e+07	5.09036e+07	3.84804e+07	0	3.67789e+07	4.96814e+07	6.98585e+07	5.38835e+07	4.38981e+07	1.39235e+07	5.397e+07	4.79714e+07	2.20076e+07	1.94273e+07	3.69207e+07	5.2599e+07	4.10672e+07	9.88074e+07	4.45338e+07	5.83611e+07	2.20085e+07	2.01652e+07	0	3.82023e+07	3.8772e+07
O14672	Disintegrin and metalloproteinase domain-containing protein 10	ADAM10	ADAM10	1.02136e+07	3.53423e+07	6.09857e+07	4.86349e+07	6.83916e+07	5.28176e+07	1.22397e+08	6.44496e+07	2.39584e+07	5.54757e+07	5.42781e+07	4.17955e+07	2.40451e+07	4.4211e+07	3.74306e+07	5.22977e+07	4.96148e+07	5.86496e+07	3.32892e+07	4.07395e+07	5.42864e+07	5.02751e+07	2.95525e+07	6.45029e+07	3.86797e+07	5.33555e+07	7.28339e+07	4.66828e+07	4.4544e+07	3.89182e+07	2.53133e+07	4.79356e+07	6.11358e+07	2.73096e+07	2.46038e+07	3.72515e+07	4.22092e+07	4.41855e+07	5.1065e+07	3.51686e+07	3.52728e+07	2.85809e+07	2.19173e+07	2.9835e+07	2.62579e+07	3.49105e+07
Q53RS1	Uncharacterized protein ADAM17 (Fragment)	ADAM17	ADAM17	0	0	0	931076	2.02981e+06	1.04525e+06	0	0	0	2.38761e+06	0	0	0	0	497976	0	0	788182	0	0	0	0	0	0	1.29963e+06	0	0	0	1.75122e+06	0	0	2.80851e+06	0	0	0	0	1.62874e+06	2.85655e+06	0	0	0	0	0	0	0	0
Q13443	Disintegrin and metalloproteinase domain-containing protein 9	ADAM9	ADAM9	0	0	0	0	0	0	0	0	0	0	0	0	0	0	0	0	0	0	0	1.2787e+06	0	0	0	0	0	0	0	0	0	0	0	0	0	0	0	0	0	0	0	0	0	0	0	0	0	0
Q8TE57	A disintegrin and metalloproteinase with thrombospondin motifs 16	ADAMTS16	ADAMTS16	0	0	0	0	1.83539e+06	0	1.35703e+06	0	0	0	0	0	1.4022e+06	0	0	0	0	0	0	0	0	0	0	1.92769e+06	0	0	0	0	0	3.16309e+06	0	6.50571e+06	9.15568e+06	0	5.09644e+06	0	0	0	3.25976e+06	0	0	0	0	0	0	8.77113e+06
P82987	ADAMTS-like protein 3	ADAMTSL3	ADAMTSL3	0	0	0	1.83841e+06	0	0	0	0	0	0	0	0	0	0	0	0	0	0	0	0	0	0	0	0	0	0	1.20691e+06	1.09867e+06	1.53538e+06	0	0	747338	1.88036e+06	0	0	0	0	0	0	0	2.06701e+06	0	0	0	0	0
A0A669KBE7	ADAMTS-like protein 4	ADAMTSL4	DKFZp434K1772;ADAMTSL4	0	0	0	0	0	0	0	0	0	0	0	0	0	0	0	0	0	0	0	0	0	0	0	0	0	0	0	0	0	0	0	0	0	0	0	0	0	0	0	0	0	0	0	0	0	0
P55265	Double-stranded RNA-specific adenosine deaminase	ADAR	ADAR	1.73306e+06	5.21477e+06	2.33761e+06	1.52218e+06	3.52303e+06	0	0	1.38799e+06	0	7.773e+06	3.38301e+06	1.05091e+06	0	1.65352e+06	0	1.21077e+06	1.0761e+06	2.91138e+06	0	2.0977e+06	2.0848e+06	2.73631e+06	1.11565e+06	1.68624e+06	3.34314e+06	2.21601e+06	2.07746e+06	0	0	0	0	5.9809e+06	6.1729e+06	0	2.06847e+06	1.04906e+06	2.88792e+06	0	9.67569e+06	3.63147e+06	2.13626e+06	0	0	0	0	0
E7ENY0	Alpha-adducin	ADD1	LA04NC01-25A3.2-001;ADD1;ADDA;ADD2	7.71713e+07	5.0549e+07	1.30876e+08	1.29825e+08	1.32239e+08	1.33551e+08	1.68038e+08	1.07908e+08	9.62177e+07	8.80861e+07	5.80106e+07	7.57453e+07	1.11311e+08	9.60688e+07	1.05893e+08	1.04745e+08	1.30791e+08	119633612	111632528	1.04317e+08	1.36184e+08	1.16358e+08	7.61831e+07	4.47187e+07	1.38655e+08	1.39402e+08	1.80363e+08	7.52023e+07	6.21072e+07	9.31925e+07	7.86004e+07	8.18079e+07	8.37085e+07	6.424e+07	2.04057e+08	6.8093e+07	7.30976e+07	9.42905e+07	9.32664e+07	9.02376e+07	9.05559e+07	9.10983e+07	5.87647e+07	8.783e+07	111530325	8.67834e+07
Q05DK5	ADD2 protein (Fragment)	ADD2	LA04NC01-25A3.2-001;ADD2;ADD1	1.36542e+07	2.18565e+07	2.64441e+07	3.2784e+07	1.98493e+07	2.50112e+07	2.81361e+07	3.39243e+07	1.82674e+07	2.32064e+07	3.47571e+07	2.17112e+07	2.32821e+06	1.32657e+07	1.27501e+07	2.09101e+07	1.53615e+07	1.7723e+07	2.44897e+07	1.79193e+07	2.74275e+07	1.78225e+07	1.9365e+07	1.17006e+07	3.11199e+07	2.84895e+07	2.33643e+07	1.21914e+07	2.14515e+07	1.09571e+07	1.26971e+07	1.94544e+07	2.03776e+07	9.29142e+06	9.08523e+06	1.67847e+07	2.08187e+07	2.11559e+07	3.02372e+07	1.59081e+07	1.45421e+07	8.01846e+06	1.52823e+07	1.02112e+07	9.43055e+06	1.96641e+07
Q5VU08	Adducin 3 (Gamma), isoform CRA_a	ADD3	ADD3	7.07422e+07	4.1892e+07	8.86436e+07	8.93629e+07	8.83851e+07	8.13712e+07	1.2766e+08	8.72206e+07	9.49373e+07	7.89302e+07	6.59799e+07	6.67527e+07	9.9463e+07	1.04054e+08	7.95931e+07	8.58944e+07	7.12316e+07	9.27802e+07	1.07093e+08	1.0145e+08	1.22883e+08	8.89012e+07	2.80072e+07	7.85557e+07	8.39143e+07	9.00178e+07	1.14749e+08	7.95834e+07	7.43183e+07	5.58745e+07	8.76451e+07	9.96897e+07	7.53696e+07	9.309e+07	9.80574e+07	6.95001e+07	6.935e+07	3.43247e+07	8.98983e+07	7.08262e+07	9.22374e+07	8.26517e+07	7.62898e+07	6.53867e+07	1.13382e+08	9.75881e+07
P48960	Adhesion G protein-coupled receptor E5	ADGRE5	ADGRE5;EMR2;ADGRE2	1.19474e+07	2.29497e+07	9.7842e+06	2.04396e+07	1.54679e+07	1.52749e+07	1.74297e+07	1.01608e+07	2.62252e+07	1.79193e+07	3.7903e+07	1.87773e+07	1.07738e+07	1.61859e+07	1.71452e+07	2.14284e+07	1.82886e+07	1.73979e+07	1.65071e+07	21818456	2.34823e+07	2.87849e+07	4.96773e+07	1.9556e+07	7.36373e+06	1.40564e+07	1.75669e+07	2.28591e+07	1.63937e+07	3.44891e+07	2.02937e+06	8.28826e+06	2.40676e+07	1.25118e+07	1.69458e+07	1.44211e+07	2.09671e+07	3.1266e+07	2.18189e+07	1.40554e+07	2.686e+07	9.07911e+06	5.74434e+06	3.92442e+06	9.66831e+06	1.36527e+07
Q86Y34	Adhesion G protein-coupled receptor G3	ADGRG3	ADGRG3	0	0	0	1.10173e+06	1.50354e+06	1.9133e+06	0	0	0	2.39592e+06	0	0	0	1.08452e+06	1.90735e+06	0	0	1.828e+06	1.08185e+06	0	0	0	2.26266e+06	0	0	0	0	0	0	0	1.12322e+06	0	0	0	0	1.66394e+06	0	0	0	0	0	0	1.35745e+06	0	0	0
Q86SQ4	Adhesion G-protein coupled receptor G6	ADGRG6	ADGRG6	0	0	0	0	0	0	0	0	0	0	0	0	0	0	0	0	0	0	0	0	0	0	0	0	0	0	0	0	0	0	0	1.02534e+06	0	0	0	0	0	0	0	0	0	0	0	0	0	0
A0A6I8PRJ0	Adhesion G protein-coupled receptor L2	ADGRL2	ADGRL2	1.72758e+06	750254	909699	2.22174e+06	752498	685829	4.94669e+06	929512	0	0	0	8.05304e+06	6.39841e+06	6.47974e+06	6.73479e+06	1.64166e+06	0	956104	5.02878e+06	0	3.65333e+06	4.19649e+06	0	3.6068e+07	1.61263e+06	2.38613e+06	3.16846e+06	5.61701e+06	752485	2.64643e+06	4.44716e+06	0	0	6.6176e+06	3.37628e+06	2.37407e+07	0	0	3.85916e+06	5.46845e+06	1.07927e+06	782206	0	6.21135e+06	2.23221e+06	3.06026e+06
P00325	All-trans-retinol dehydrogenase [NAD(+)] ADH1B	ADH1B	HEL-S-4;ADH1C;ADH1B;ADH1A;ADH4	1.15434e+06	1.73166e+07	6.22603e+06	1.80096e+08	1.04038e+07	1.60684e+08	6.92383e+07	4.93764e+07	9.397e+06	1.65676e+07	8.24878e+06	1.13013e+07	2.88783e+08	4.62038e+07	1.7534e+07	6.29994e+06	2.70317e+07	3.92957e+07	1.07623e+07	1.44346e+07	1.89376e+08	4.19719e+07	6.05328e+06	1.25313e+07	3.4679e+07	4.6534e+06	1.1913e+08	5.86159e+07	9.192e+06	6.69348e+07	3.05699e+07	2.93948e+06	2.61211e+07	1.81558e+07	3.2889e+08	2.86808e+06	1.11444e+07	1.08002e+07	7.40383e+06	4.3259e+06	4.90136e+07	5.0642e+07	1.93448e+07	8.06374e+07	8.48084e+07	2.67477e+06
V9HW50	All-trans-retinol dehydrogenase [NAD(+)] ADH1B	ADH1B	HEL-S-4;ADH1C;ADH1B;ADH1A;ADH4	5.23033e+06	1.63497e+06	1.2564e+08	0	2.67907e+07	1.58918e+07	0	0	1.26446e+07	0	0	0	2.06956e+07	1.28034e+06	2.04838e+06	3.10129e+07	1.95788e+06	1.39876e+06	1.38661e+07	0	0	0	0	0	1.82094e+06	8.83512e+07	3.18091e+06	0	0	0	1.12875e+06	0	0	0	0	0	0	0	882310	2.20659e+07	6.09857e+06	2.76686e+06	0	4.90822e+06	2.96669e+06	2.90915e+07
P00326	Alcohol dehydrogenase 1C	ADH1C	ADH1C;ADH1B;ADH1A;ADH6	1.23521e+06	5.62569e+06	1.5189e+06	895361	3.2473e+06	0	0	1.53583e+06	7.96551e+07	1.13161e+06	894756	1.89208e+06	4.83935e+06	1.16434e+07	2.53051e+06	576627	7.04318e+07	8.20224e+06	1.05209e+06	1.15188e+06	0	1.97457e+06	3.56953e+06	3.77344e+06	3.02976e+06	3.26019e+06	2.14787e+06	7.80522e+07	7.82022e+06	6.74894e+06	1.02985e+06	3.64941e+06	3.33585e+06	4.8297e+06	2.75582e+06	6.70002e+06	4.52052e+06	2.33029e+06	0	6.87824e+06	1.95354e+07	1.90502e+06	1.5228e+06	1.45518e+06	1.88837e+06	2.91136e+06
P28332	Alcohol dehydrogenase 6	ADH6	ADH1C;ADH6;ADH5	2.53587e+06	3.19649e+06	5.87409e+06	8.63492e+06	6.44173e+06	7.44309e+06	5.98763e+06	3.31855e+06	5.01011e+06	1.00991e+07	9.14475e+06	6.80156e+06	3.4608e+06	6.19363e+06	6.72464e+06	1.03255e+07	5.47569e+06	1.21806e+07	4.84792e+06	3.61094e+06	8.92516e+06	5.80503e+06	2.86839e+06	3.88432e+06	5.18528e+06	5.58883e+06	9.2908e+06	4.06905e+06	3.98624e+06	4.06525e+06	2.99862e+06	6.20945e+06	4.42899e+06	2.51416e+06	4.16996e+06	3.92331e+06	3.41066e+06	2.2305e+06	4.4094e+06	5.02911e+06	4.61845e+06	3.80855e+06	2.32396e+06	4.90286e+06	3.03226e+06	3.11962e+06
P40394	All-trans-retinol dehydrogenase [NAD(+)] ADH7	ADH7	ADH7	4.76168e+06	2.41599e+06	3.12138e+06	2.67459e+06	1.8347e+06	0	706506	2.15984e+06	0	0	4.83016e+06	1.34636e+06	7.08976e+06	4.12021e+06	4.5132e+06	3.56055e+06	5.28658e+06	3.39308e+06	5.48546e+06	898357	2.09307e+06	0	4.67766e+06	8.0003e+06	935304	1.64455e+06	4.02465e+06	3.79277e+06	0	6.46557e+06	4.26451e+06	4.46115e+06	3.75093e+06	6.08119e+06	3.4739e+06	6.20429e+06	4.72725e+06	5.87181e+06	8.83373e+06	5.72307e+06	2.57673e+06	4.26549e+06	4.93412e+06	1.84886e+06	2.51636e+06	6.08079e+06
A0A024R805	Alcohol dehydrogenase iron-containing protein 1	ADHFE1	ADHFE1	1.47325e+06	2.92809e+06	1.03098e+06	1.3988e+06	971877	805775	0	822959	1.61708e+06	2.34589e+06	1.90229e+06	2.37584e+06	1.63359e+06	1.55487e+06	2.37034e+06	1.32892e+06	1.26115e+06	1.69532e+06	1.63815e+06	2.02615e+06	2.19613e+06	1.77035e+06	1.77277e+06	2.23636e+06	1.12552e+06	1.62827e+06	0	2.47223e+06	799256	2.27998e+06	1471691	2.17531e+06	2.9292e+06	1.11379e+06	1.78442e+06	2.17728e+06	2.49529e+06	2.18649e+06	1.77573e+06	2.34494e+06	3.19798e+06	2.27489e+06	1.77739e+06	1.77703e+06	2.23623e+06	1.67357e+06
Q9BV57	1,2-dihydroxy-3-keto-5-methylthiopentene dioxygenase	ADI1	ADI1	0	2.00657e+07	3.43083e+06	6.13956e+06	6.77759e+06	3.3263e+06	728359	3.01534e+06	4.85861e+06	2.61813e+07	1.41378e+07	8.44667e+06	3.80154e+06	9.55199e+06	8.6504e+06	8.95269e+06	7.44552e+06	1.54901e+07	4.69173e+06	6.62273e+06	2.65657e+06	3.41242e+06	1.15949e+07	6.56759e+06	4.30026e+06	0	3.41706e+06	1.08039e+07	1.9668e+07	4.51813e+06	2.03596e+06	4.81364e+06	1.46199e+07	1.41694e+06	9.53049e+06	847122	1.22823e+07	6.21304e+06	7.19269e+06	4.43968e+06	6.67976e+06	969705	0	1.56249e+06	0	0
A0A024RAA7	Adiponectin B	ADIB	ADIB	4.71782e+07	5.23831e+07	4.24245e+07	4.08774e+07	4.68815e+07	3.20629e+07	3.98359e+07	4.11394e+07	3.73829e+07	3.20094e+07	1.25622e+08	3.74439e+07	3.13422e+07	4.67211e+07	5.13733e+07	4.51704e+07	4.482e+07	3.80276e+07	4.06503e+07	3.81941e+07	2.1644e+07	4.02126e+07	8.06703e+06	9.03264e+07	2.14231e+07	2.87341e+07	3.47371e+07	8.85828e+07	9.35855e+07	4.97813e+07	4.27594e+07	7.07138e+07	7.24625e+07	7.40339e+07	2.70662e+07	8.70737e+07	6.10455e+07	1.10774e+08	1.04533e+08	6.0285e+07	7.03603e+07	6.76357e+07	9.8937e+07	3.89797e+07	5.011e+07	5.88867e+07
A0A024RAG6	Complement C1q subcomponent subunit A	ADIC	ADIC;C1QA	3.94118e+06	8.09321e+06	1.07702e+07	1.33403e+07	12776597	9.31118e+06	6.33394e+06	1.17332e+07	8.43115e+06	9.35689e+06	3.07241e+07	1.2444e+07	8.85732e+06	7.35919e+06	1.69941e+07	5.71086e+06	9.62921e+06	6.44857e+06	9.56283e+06	1.02351e+07	5.21278e+06	1.02299e+07	1.06517e+06	1.3974e+07	2.66081e+06	5.63852e+06	4.38408e+06	2.07394e+07	2.00517e+07	8.17017e+06	3.99602e+06	1.12579e+07	1.65286e+07	5.7084e+06	2.80345e+06	1.94361e+07	1.71968e+07	3.1611e+07	1.83247e+07	1.08967e+07	1.4441e+07	1.83179e+07	2.95328e+07	1.21114e+07	6.9553e+06	6.81582e+06
A0A3B0IT49	Adiponectin G	ADIG	C1QTNF7;ADIG	7.26906e+06	6.55507e+06	5.4591e+06	7.15934e+06	4.8948e+06	5.20545e+06	1.90275e+06	4.35159e+06	4.68338e+06	4.60749e+06	5.26025e+06	0	1.09402e+07	6.16821e+06	2.08911e+06	1.3371e+06	8.55835e+06	7.62953e+06	1.22333e+07	2.09686e+06	5.73307e+06	1.89557e+06	0	1.96667e+06	1.14e+06	4.33458e+06	7.28103e+06	8.16374e+06	3.80924e+06	5.28561e+06	1.22963e+07	3.55849e+06	1.91975e+06	1.21836e+07	1.19963e+07	4.65791e+06	1.62686e+06	967767	8.16452e+06	6.15933e+06	2.51206e+06	5.72305e+06	2.41972e+06	3.16939e+06	5.37403e+06	1.29543e+07
Q15847	Adipogenesis regulatory factor	ADIRF	ADIRF	8.56658e+07	2.01541e+07	6.891e+07	3.94562e+07	3.78408e+07	9.07094e+07	3.11381e+07	6.31465e+07	3.00164e+07	1.70297e+07	1.51511e+07	1.92381e+07	9.29099e+07	2.97403e+07	3.13924e+07	2.58182e+07	4.56999e+07	6.56776e+07	8.9424e+07	2.09344e+07	4.16047e+07	1.3897e+07	6.46599e+06	8.58583e+06	5.34684e+07	5.80522e+07	1.4614e+08	29759765	3.50295e+06	4.55061e+07	3.84121e+07	1.94725e+07	1.8824e+07	5.9597e+07	3.75335e+07	1.49939e+07	1.87481e+07	9.03696e+06	6.85729e+06	2.76031e+07	2.3206e+07	8.34389e+07	2.1349e+07	127032511	6.73997e+07	8.10212e+07
P55263	Adenosine kinase	ADK	ADK	9.92627e+07	2.60817e+08	1.14048e+08	2.68968e+08	4.412e+08	1.74108e+08	274569022	1.59411e+08	4.73269e+08	3.12981e+08	305280004	4.0972e+08	176010226	2.24066e+08	1.81801e+08	2.60514e+08	2.61892e+08	2.20008e+08	1.68958e+08	2.94946e+08	1.79644e+08	2.03757e+08	1.21446e+08	2.10349e+08	9.1289e+07	185663912	1.71939e+08	3.09711e+08	4.93923e+08	2.17282e+08	169049713	2.92367e+08	3.26791e+08	9.89714e+07	1.70937e+08	2.10224e+08	2.99409e+08	2.15289e+08	8.34826e+08	261968608	2.97863e+08	9.57967e+07	8.29236e+07	7.59879e+07	2.37584e+08	1.13504e+08
Q9H2P0	Activity-dependent neuroprotector homeobox protein	ADNP	ADNP	2.4963e+06	2.1645e+07	6.67289e+06	7.42311e+06	8.34592e+06	9.96659e+06	5.66946e+06	3.20172e+06	7.58843e+06	9.88567e+06	4.97944e+06	3.70972e+06	5.6396e+06	250733	8.65053e+06	1.21532e+07	3.20223e+06	5.94412e+06	8.98092e+06	6391230	657074	5.66023e+06	2.47112e+06	7.4767e+06	1.80013e+06	5.17032e+06	5.55459e+06	5.03625e+06	1.48238e+07	6.65826e+06	4.67081e+06	7.37779e+06	5.08532e+06	2.23676e+06	8.19545e+06	5.09021e+06	5.00802e+06	9.65983e+06	8.69485e+06	7.62493e+06	5.83984e+06	6.48705e+06	1.37332e+06	5.64894e+06	7.97866e+06	4.37395e+06
Q9BRR6	ADP-dependent glucokinase	ADPGK	DKFZp667C1917;ADPGK	1.76843e+07	9.90304e+06	1.05419e+07	2.03934e+07	4.26273e+07	2.19383e+07	2.13678e+07	1.44158e+07	7.48198e+06	2.3237e+07	3.95406e+07	1.63338e+07	3.03112e+07	1.88156e+07	1.36533e+07	2.41531e+07	6.99463e+06	7.671e+06	7.56507e+06	3.10116e+07	1.31381e+07	3.51138e+07	1.24572e+07	1.30386e+07	9.99298e+06	3.31809e+07	5.49746e+07	1.56976e+07	1.8747e+07	1.7219e+07	4.55021e+06	1.41787e+07	1.99871e+07	853108	4.1379e+06	1.31418e+07	2.489e+07	3.53514e+07	3.60025e+07	7.57291e+06	6.23374e+06	4.08763e+06	4.98682e+06	2.27316e+06	3.27648e+06	1.85743e+06
P54922	[Protein ADP-ribosylarginine] hydrolase	ADPRH	ADPRH	3.87402e+06	1.04962e+07	3.33951e+06	3.46849e+06	2.84082e+06	4.05093e+06	1.9502e+06	1.57022e+06	5.5459e+06	7.67336e+06	7.88838e+06	5.2161e+06	0	6.83364e+06	6.7149e+06	5.41244e+06	3.5297e+06	8.44963e+06	6.14255e+06	1.22216e+07	7.35674e+06	7.05283e+06	0	6.28073e+06	812525	4.09897e+06	7.34228e+06	4.76273e+06	5.62051e+06	4.98623e+06	6.38609e+06	8.41063e+06	5.23508e+06	3.06073e+06	4.62207e+06	4.48033e+06	7.05831e+06	5.43409e+06	1.14839e+07	5.70441e+06	7.74922e+06	3.3092e+06	4.12035e+06	4.7904e+06	5.95215e+06	1.50352e+06
Q9NX46	ADP-ribose glycohydrolase ARH3	ADPRS	ADPRS;ADPRHL2	1.65396e+07	3.37099e+07	1.36957e+07	2.36309e+07	1.68914e+07	1.50821e+07	2.63908e+07	1.45985e+07	2.89779e+07	5.73084e+07	2.92141e+07	2.97101e+07	2.70381e+07	2.30886e+07	1.82999e+07	3.3254e+07	1.78553e+07	2.70181e+07	2.06179e+07	3.81755e+07	2.0796e+07	1.72743e+07	1.31291e+07	1.95875e+07	1.09958e+07	2.13022e+07	2.16729e+07	2.65121e+07	3.95201e+07	3.01861e+07	2.23351e+07	2.42685e+07	2.94656e+07	1.8128e+07	3.80985e+07	1.91011e+07	2.3435e+07	2.97372e+07	4.42819e+07	2.11384e+07	3.00697e+07	1.44866e+07	8.74845e+06	1.08105e+07	1.89828e+07	7.58683e+06
A0A0S2Z392	G protein-coupled receptor kinase (Fragment)	ADRBK1	GRK2;ADRBK1;GRK3	2.26458e+07	2.06525e+07	5.30449e+07	5.46993e+07	8.3756e+07	9.54905e+07	5.53506e+07	7.51586e+07	3.91375e+07	3.98392e+07	3.06195e+07	3.27664e+07	3.31571e+07	3.90157e+07	4.29119e+07	3.37962e+07	1.73572e+07	4.68564e+07	3.49321e+07	3.56234e+07	63509858	4.75223e+07	2.53881e+07	1.17567e+07	5.48289e+07	5.02801e+07	5.3786e+07	4.12471e+07	4.37015e+07	4.48595e+07	4.59424e+07	2.62662e+07	7.95717e+07	2.35241e+07	3.27482e+07	2.20131e+07	2.22749e+07	2.30478e+07	2.4289e+07	2.19351e+07	2.7315e+07	2.38616e+07	2.81552e+07	3.07465e+07	2.58093e+07	2.49969e+07
Q16186	Proteasomal ubiquitin receptor ADRM1	ADRM1	DKFZp686G2045;ADRM1	1.57636e+06	1.42317e+07	2.65757e+06	1.07175e+07	3.82588e+06	5.05636e+06	9.98148e+06	5.40254e+06	4.75193e+06	9.43627e+06	9.47247e+06	5.6972e+06	1.76557e+07	4.49147e+06	6.13093e+06	9.95247e+06	4.99942e+06	6.67313e+06	3.38984e+06	8.37914e+06	6.26944e+06	3.97428e+06	2.17815e+06	1.15964e+07	0	1.42955e+06	9.98339e+06	1.12769e+07	1.93629e+07	1.03683e+07	4.09809e+06	1.22283e+07	1.98238e+07	2.54163e+06	8.76986e+06	9.7643e+06	1.48137e+07	2.06546e+07	2.06177e+07	1.64566e+07	1.87637e+07	1.62206e+06	2.05361e+06	0	7.46602e+06	6.26062e+06
A0A024R5Q7	Adenylosuccinate synthetase isozyme 2	ADSS	ADSS;ADSS1	2.74759e+07	4.50306e+07	3.07747e+07	4.74057e+07	3.19247e+07	4.5288e+07	4.01718e+07	5.28032e+07	2.99336e+07	3.20895e+07	37999605	2.92825e+07	3.13012e+07	4.10918e+07	4.22584e+07	4.15701e+07	3.76407e+07	3.54557e+07	3.64232e+07	4.60672e+07	3.96207e+07	5.50662e+07	4.56617e+07	6.0237e+07	3.49153e+07	3.7513e+07	4.21858e+07	5.95341e+07	6.91901e+07	3.13482e+07	2.97066e+07	5.98197e+07	49615411	2.3481e+07	2.29692e+07	4.17567e+07	4.44146e+07	5.77605e+07	4.81337e+07	3.6306e+07	2.51717e+07	2.8452e+07	2.79225e+07	2.5394e+07	2.58992e+07	2.1573e+07
Q8N142	Adenylosuccinate synthetase isozyme 1	ADSS1	ADSS;ADSS1	0	0	1.66291e+06	0	2.57942e+06	0	0	0	0	0	0	0	0	0	0	0	0	0	0	3.20844e+06	0	2.22548e+06	2.01927e+06	0	0	1.77635e+06	2.15946e+06	0	0	0	0	1.1752e+06	0	0	0	0	0	0	0	0	0	0	0	0	0	0
Q8IUX7	Adipocyte enhancer-binding protein 1	AEBP1	CPXM2;AEBP1;DKFZp666J235	1.62901e+08	3.46705e+08	1.30181e+08	1.46175e+08	1.90713e+08	2.04877e+08	4.48129e+08	2.15896e+08	1.72664e+08	1.66922e+08	5.37859e+08	2.34352e+08	210896611	163346828	1.42211e+08	1.43041e+08	178837996	178807653	1.55522e+08	1.73157e+08	1.1418e+08	1.70674e+08	2.39058e+08	9.15662e+07	107852911	1.76871e+08	1.68611e+08	1.3699e+08	1.95222e+08	1.3828e+08	1.56673e+08	8.86426e+07	1.82007e+08	1.38311e+08	1.48756e+08	1.80053e+08	160628470	3.06252e+08	1.66979e+08	1.68363e+08	1.63009e+08	8.68229e+07	1.76448e+08	1.09918e+08	1.16089e+08	1.07151e+08
H0Y7R8	Afadin (Fragment)	AFDN	MLLT4;AFDN	2.42499e+06	0	0	0	0	0	3.6549e+06	0	0	0	0	0	0	2.169e+06	0	2.89566e+06	0	0	0	0	0	0	1.15903e+06	0	0	0	0	0	0	0	0	0	0	0	2.45395e+06	0	0	2.2178e+06	1.92162e+06	0	0	0	1.39717e+06	0	0	1.10856e+06
Q8WV93	AFG1-like ATPase	AFG1L	AFG1L	0	0	0	1.09576e+06	757118	836750	701569	0	746225	0	0	0	0	0	0	0	824441	575187	0	0	1.71504e+06	946049	672611	0	0	0	722525	0	0	0	0	0	0	0	0	473213	752422	567432	434287	0	0	0	1.42646e+06	0	0	0
Q9Y4W6	AFG3-like protein 2	AFG3L2	ANK2;AFG3L2	2.10846e+07	4.31908e+07	7.27568e+07	6.42856e+07	5.7383e+07	8.47365e+07	1.03732e+08	9.1339e+07	6.56442e+07	4.24931e+07	5.03451e+07	5.56762e+07	4.46277e+07	3.33276e+07	5.84538e+07	6.17666e+07	4.40319e+07	4.23151e+07	3.61107e+07	9.47377e+07	6.94788e+07	1.03547e+08	7.32377e+07	4.13608e+07	6.71067e+07	7.70769e+07	6.881e+07	6.48873e+07	8.6826e+07	5.20558e+07	5.37351e+07	7.01949e+07	7.19394e+07	4.34182e+07	4.09493e+07	4.19781e+07	6.99539e+07	7.71777e+07	1.12696e+08	5.67493e+07	6.40543e+07	1.4742e+07	5.91726e+07	3.7156e+07	4.53882e+07	4.34022e+07
P43652	Afamin	AFM	AFM	6.43976e+08	2.7375e+08	411447430	2.07696e+08	2.73571e+08	3.93614e+08	6.91759e+07	5.15818e+07	3.10078e+08	1.64051e+08	3.07653e+08	2.03507e+08	2.18101e+08	2.75872e+08	2.06605e+08	3.86802e+08	2.39198e+08	1.88707e+08	2.13918e+08	1.03926e+08	2.60166e+08	1.51049e+08	3.1133e+08	330045733	3.74006e+08	1.40058e+08	2.08285e+08	1.61975e+08	1.82794e+08	3.35118e+08	274543646	3.90297e+08	2.34729e+08	1.51167e+08	2.1331e+08	194409979	298568556	5.26164e+08	9.79307e+07	2.16627e+08	1.56817e+08	2.93968e+08	203633886	2.15456e+08	2.20089e+08	7.3336e+08
P20933	N(4)-(beta-N-acetylglucosaminyl)-L-asparaginase	AGA	AGA	1.19158e+06	3.19969e+07	2.45479e+06	1.4897e+07	1.081e+07	8.09714e+06	2.24085e+07	8.51775e+06	1.21424e+07	1.76966e+07	2.26439e+07	6.0772e+06	9.43076e+06	6.26283e+06	5.16824e+06	1.06837e+07	8.48348e+06	4.70832e+06	4.15676e+06	1.55194e+07	9.61278e+06	1.13627e+07	8.37252e+06	1.88531e+07	3.16891e+06	9.48774e+06	9.32598e+06	1.10023e+07	5.99632e+06	1.2825e+07	5.17446e+06	3.61483e+06	1.16259e+07	1.74498e+06	6.47084e+06	2.73297e+07	1.52055e+07	8.79985e+06	9.70874e+06	5.83516e+06	6.93273e+06	5.65927e+07	1.45319e+07	1.10637e+07	7.1667e+06	8.47383e+06
Q96P47	Arf-GAP with GTPase, ANK repeat and PH domain-containing protein 3	AGAP3	AGAP1;AGAP3;DKFZp761E2216;CENTG3;CENTG2	0	3.42923e+06	7.4408e+06	3.87992e+06	4.26674e+06	0	5.58205e+06	6.80727e+06	3.12363e+06	2.40818e+06	4.38159e+06	0	4.50911e+06	5.49677e+06	2.48883e+06	0	0	3.4977e+06	1.94847e+06	1.67582e+06	2.1316e+06	4.4731e+06	2.15084e+06	0	2.4859e+06	4.4412e+06	4.75524e+06	2.54135e+06	2.34113e+06	5.27207e+06	2.48993e+06	1.10733e+06	2.07426e+06	1.58151e+06	2.67021e+06	3.36428e+06	2.74389e+06	6.72333e+06	0	2.00538e+06	2.5292e+06	0	0	0	0	0
A0A0S2Z462	ArfGAP with FG repeats 1 isoform 2 (Fragment)	AGFG1	HRB;AGFG2;AGFG1	5.71259e+07	5.04035e+07	8.50686e+07	4.85409e+07	5.11832e+07	5.38688e+07	6.15345e+07	3.08683e+07	5.21553e+07	5.44694e+07	5.20997e+07	8.75993e+07	3.48565e+07	5.19374e+07	3.64067e+07	4.01602e+07	6.20902e+07	3.76496e+07	5.27859e+07	4.35374e+07	2.5526e+07	3.24071e+07	3.72416e+07	4.93293e+07	6.54007e+07	5.14899e+07	6.21807e+07	5.01427e+07	2.85826e+07	5.59951e+07	4.03055e+07	4.58466e+07	4.06151e+07	5.59247e+07	5.2932e+07	4.72929e+07	5.20551e+07	4.68708e+07	3.99539e+07	4.52013e+07	3.49251e+07	7.0031e+07	3.30176e+07	4.48205e+07	5.20325e+07	6.54279e+07
O95081	Arf-GAP domain and FG repeat-containing protein 2	AGFG2	HRB;AGFG2;AGFG1	5.84855e+06	6.55145e+06	3.18642e+06	5.4877e+06	3.55373e+06	4.04316e+06	4.15046e+06	3.96273e+06	4.9828e+06	5.80776e+06	4.41764e+06	5.68073e+06	5.09972e+06	5.04389e+06	3.54157e+06	5.55986e+06	4.54114e+06	3.98975e+06	2.58455e+06	1.52972e+06	3.658e+06	4.1221e+06	1.42408e+06	1.25476e+07	1.31579e+06	2.6381e+06	4.87268e+06	7.20331e+06	1.42836e+07	7.7596e+06	4.57802e+06	8.4891e+06	7.28888e+06	3.56703e+06	7.29485e+06	6.31199e+06	5.50535e+06	5.27576e+06	1.49985e+07	6.96186e+06	6.50916e+06	4.77825e+06	2.86289e+06	3.37993e+06	5.38196e+06	3.01557e+06
E9PC15	Acylglycerol kinase, mitochondrial	AGK	AGK	9.90137e+06	7.14249e+07	6.97744e+07	8.78521e+07	1.17557e+08	1.17534e+08	5.4999e+07	4.23148e+07	9.25198e+06	2.17633e+07	1.58259e+08	1.89366e+08	1.16034e+08	2.01506e+08	1.84468e+08	131187201	1.60993e+08	9.61786e+07	187318876	35644082	1.2236e+08	6.90464e+07	1.65961e+08	1.25147e+07	1.83045e+08	4.08409e+07	1.0362e+08	2.294e+07	1.03961e+08	1.89903e+07	1.98013e+07	1.20997e+08	9.22955e+07	9.31738e+06	1.07673e+08	2.70095e+08	2.72351e+08	4.6236e+07	7.16596e+07	1.97337e+08	8.04144e+07	8.47385e+06	1.06153e+07	1.2817e+07	2.56227e+08	2.88179e+08
A0A0S2A4E4	4-alpha-glucanotransferase	AGL	AGL	1.27519e+08	2.24551e+08	1.44038e+08	2.76032e+08	2.4182e+08	1.69436e+08	2.5544e+08	2.24684e+08	2.30199e+08	2.98428e+08	2.25577e+08	1.95675e+08	236133041	1.82616e+08	2.02674e+08	2.2522e+08	1.86152e+08	2.99771e+08	1.9062e+08	2.33541e+08	2.79693e+08	2.43571e+08	1.54665e+08	2.41672e+08	1.32999e+08	1.96426e+08	2.58758e+08	2.36913e+08	3.17823e+08	2.34146e+08	1.58923e+08	2.2249e+08	2.63703e+08	1.46818e+08	1.62242e+08	1.88573e+08	3.0151e+08	2.1954e+08	3.21087e+08	2.24014e+08	2.64023e+08	1.36087e+08	3.47513e+08	1.46541e+08	1.10693e+08	1.9226e+08
Q9UKV8	Protein argonaute-2	AGO2	EIF2C3;EIF2C2;AGO4;AGO1;AGO3;AGO2	7.89456e+06	1.30508e+07	2.0005e+07	2.36051e+07	2.50566e+07	2.4806e+07	1.94153e+07	1.79107e+07	1.8503e+07	1.61775e+07	1.36273e+07	1.53244e+07	8.21758e+06	1.21424e+07	1.50707e+07	2.73553e+07	3.01939e+07	1.90705e+07	1.24737e+07	6.78665e+06	2.03941e+07	1.94752e+07	1.29236e+07	1.16293e+07	1.3777e+07	4.8905e+07	2.1978e+07	9.73213e+06	1.78309e+07	1.12035e+07	2.16588e+07	1.97023e+07	3.28438e+07	1.49823e+07	2.87729e+06	1.29235e+07	1.73467e+07	3.51296e+07	2.4879e+07	7.67348e+06	3.50368e+06	953899	3.76901e+06	1.35855e+07	1.07445e+07	9.97202e+06
Q9H9G7	Protein argonaute-3	AGO3	EIF2C3;EIF2C2;AGO4;AGO1;AGO3;AGO2	601314	0	1.8739e+06	6.04522e+06	4.05571e+06	3.73924e+06	3.92239e+06	4.55025e+06	7.77106e+06	3.56192e+06	2.65957e+06	3.74828e+06	0	4.57965e+06	1.39758e+06	3.21645e+06	9.37731e+06	4.99412e+06	1.68794e+06	2.87234e+06	1.2299e+06	1.00863e+06	2.40876e+06	1.14862e+06	0	1.28084e+06	2.10685e+06	0	3.41471e+06	1.17802e+06	1.06399e+06	1.66746e+06	2.45313e+06	993290	0	0	0	0	5.29848e+06	0	0	2.79498e+06	0	0	1.42863e+06	0
A0A024R8F9	1-acylglycerol-3-phosphate O-acyltransferase 2 (Lysophosphatidic acid acyltransferase, beta), isoform CRA_b	AGPAT2	AGPAT2	0	0	2.9329e+06	4.33305e+06	1.23003e+06	2.18254e+06	860568	4.64022e+06	0	1.97826e+06	0	0	638017	0	0	0	0	0	0	1.4466e+06	5.8665e+06	2.39206e+06	0	2.96671e+06	0	3.06238e+06	4.62098e+06	0	5.97848e+06	1.90111e+06	1.07369e+06	1.23624e+06	0	0	0	0	990184	0	0	0	1.65669e+06	0	0	0	0	0
Q9NRZ7	1-acyl-sn-glycerol-3-phosphate acyltransferase gamma	AGPAT3	AGPAT3	9.53494e+06	3.4802e+07	1.15598e+07	1.98147e+07	1.72447e+07	1.25902e+07	2.69532e+07	1.79937e+07	1.97593e+07	2.37599e+07	2.69239e+07	1.99026e+07	2.59157e+07	1.42906e+07	2.30857e+07	2.49358e+07	1.51304e+07	1.35261e+07	7.33993e+06	1.93863e+07	1.59836e+07	2.33002e+07	2.28332e+07	2.5822e+07	7.67065e+06	1.08638e+07	1.29804e+07	3.77654e+07	5.50895e+07	3.6251e+07	2.54208e+07	3.6389e+07	3.30841e+07	1.03565e+07	1.804e+07	1.89415e+07	3.28118e+07	2.85902e+07	6.51157e+07	2.67108e+07	2.66688e+07	1.47208e+07	1.41628e+07	1.24369e+07	2.66924e+07	1.68701e+07
Q6NUM7	AGPAT5 protein (Fragment)	AGPAT5	AGPAT5	9.15008e+06	8.04547e+06	7.99524e+06	1.39194e+07	0	5.04398e+06	2.98705e+06	3.34454e+06	1.21026e+07	7.39604e+06	5.81589e+06	5.06966e+06	7.68599e+06	9.11572e+06	7.83333e+06	1.65317e+07	9.09949e+06	5.4328e+06	6.38204e+06	2.18053e+06	1.01702e+07	7.48979e+06	3.70844e+06	7.39756e+06	3.73557e+06	4.49634e+06	5.21379e+06	1.02783e+07	1.14242e+07	1.36441e+07	7.07035e+06	1.39391e+07	1.27776e+07	6.45988e+06	7.92652e+06	7.29249e+06	1.03415e+07	8.86764e+06	1.09487e+07	1.21032e+07	6.92822e+06	5.77267e+06	4.50512e+06	4.79443e+06	5.73052e+06	6.38746e+06
O00116	Alkyldihydroxyacetonephosphate synthase, peroxisomal	AGPS	AGPS	3.80263e+07	3.4171e+07	3.83767e+07	3.81078e+07	4.99874e+07	4.58285e+07	4.10356e+07	2.6794e+07	5.50946e+07	4.95362e+07	4.13079e+07	6.16223e+07	3.33166e+07	4.482e+07	4.18329e+07	4.23288e+07	4.53081e+07	2.18406e+07	5.4072e+07	4.88422e+07	5.62909e+07	4.36762e+07	6.6855e+07	3.90019e+07	5.31631e+07	4.69513e+07	4.36346e+07	3.72084e+07	4.74129e+07	3.29045e+07	4.01048e+07	5.95227e+07	3.68873e+07	5.4769e+07	3.36825e+07	3.86322e+07	6.22276e+07	6.41265e+07	4.00414e+07	3.45693e+07	4.10552e+07	6.75877e+07	5.5235e+07	7.36044e+07	1.28232e+06	4.16588e+07
Q4JM47	AGR2	AGR2	AGR2;AGR3	4.30234e+07	4.52752e+08	4.58519e+07	1.84581e+08	1.29234e+08	2.33056e+08	3.8707e+07	3.08585e+07	7.32077e+07	9.55747e+07	342883413	3.51163e+08	174323724	4.82421e+08	4.9479e+07	1.02768e+08	2.53899e+08	3.52732e+08	1.04066e+08	1.46544e+08	1.12938e+08	3.00867e+07	1.26342e+08	3155610917	3.28853e+07	1.42216e+08	9.73116e+07	3.69005e+08	6.32087e+07	5.59146e+08	3.47031e+08	3.09839e+08	8.33603e+08	1.17364e+08	1.99701e+08	9.08687e+07	7.77385e+07	1.07659e+08	1.36754e+08	2.80391e+08	7.55957e+07	5.29935e+07	8.08888e+07	2.92225e+07	121590002	197709747
Q8TD06	Anterior gradient protein 3	AGR3	AGR2;AGR3	8.61255e+06	1.4285e+07	2.75533e+07	5.01132e+07	2.60475e+07	4.6794e+07	5.23209e+07	1.2031e+07	1.79315e+08	1.94678e+08	1.74817e+07	1.59224e+08	4.34285e+07	1.30038e+08	1.37308e+07	1.22665e+08	5.75535e+07	3.26449e+07	3.27932e+07	2.22384e+07	5.6039e+07	1.97633e+07	1.55246e+07	2.74766e+08	2.53849e+07	5.50525e+07	8.02469e+07	6.33389e+07	1.58235e+07	8.04877e+07	3.26634e+08	3.03864e+07	8.97743e+07	2.79415e+07	5.93679e+07	1.92297e+07	2.54057e+07	3.85489e+07	9.64573e+07	9.24283e+06	3.33577e+07	2.15073e+07	1.12573e+07	1.53439e+07	4.59816e+07	2.70552e+07
O00468	Agrin	AGRN	AGRN	4.19678e+07	3.35887e+07	6.148e+07	4.93165e+07	6.14886e+07	5.23423e+07	3.3494e+07	2.59335e+07	3.44523e+07	2.85539e+07	2.63777e+07	4.25266e+07	3.00979e+07	3.40553e+07	4.99442e+07	5.15945e+07	4.96074e+07	7.24203e+07	7.39389e+07	2.70561e+07	4.91874e+07	3.05238e+07	1.21259e+07	3.34504e+07	5.81685e+07	4.34796e+07	7.50819e+07	5.22207e+07	7.10605e+07	5.3644e+07	2.65003e+07	3.9616e+07	3.25222e+07	2.32514e+07	3.94149e+07	3.66714e+07	3.31371e+07	3.28199e+07	4.22345e+07	3.68383e+07	4.76692e+07	6.88999e+07	3.24948e+07	8.13303e+07	6.95357e+07	4.61577e+07
A0A494C0G5	Agrin	AGRN	AGRN	1.6287e+08	8.32677e+07	1.29485e+08	7.68131e+07	6.80127e+07	1.19891e+08	4.6786e+07	3.29754e+07	6.79121e+07	9.40959e+07	9.16799e+07	1.22938e+08	8.08669e+07	1.0214e+08	1.30561e+08	1.06233e+08	1.44244e+08	7.08197e+07	1.61121e+08	1.03759e+08	1.22282e+08	8.66929e+07	4.86822e+07	158642190	1.23841e+08	9.26404e+07	1.10034e+08	1.35204e+08	7.29658e+07	1.3163e+08	1.74101e+08	9.45988e+07	6.92354e+07	184105071	7.14426e+07	1.47706e+08	1.44874e+08	1.02336e+08	8.14729e+07	1.07715e+08	9.24067e+07	2.17704e+08	133187788	1.53069e+08	1.39941e+08	308374464
P50052	Type-2 angiotensin II receptor	AGTR2	AGTR2	0	0	494868	0	615263	0	0	0	0	0	0	782728	0	0	0	0	0	0	0	0	0	0	888557	0	0	738089	686564	0	1.37647e+06	0	0	0	0	0	0	0	0	0	434243	0	0	0	0	0	0	0
Q8WYP5	Protein ELYS	AHCTF1	AHCTF1	2.64744e+06	2.52304e+06	0	0	2.23071e+06	0	0	0	4.7223e+06	806059	6.4374e+06	3.8757e+06	3.18757e+06	1.85062e+06	2.42299e+06	982856	3.7574e+06	7.31906e+06	0	1.92753e+06	2.29245e+06	0	0	8.0028e+06	0	0	0	4.54951e+06	3.09939e+06	0	5722510	2.56712e+06	3.34084e+06	0	5.20382e+06	5.56856e+06	3.54154e+06	2.95034e+06	3.03065e+06	5.60249e+06	3.46612e+06	2.65714e+06	3.14876e+06	1.02886e+06	3.00053e+06	6.40797e+06
P23526	Adenosylhomocysteinase	AHCY	FGFR2-AHCYL1;AHCY;AHCYL1;AHCYL2	1.64158e+08	4.44898e+08	1.77268e+08	4.17446e+08	3.34648e+08	2.38712e+08	357756260	2.85762e+08	2.81626e+08	5.0146e+08	366340442	2.98875e+08	2.71991e+08	3.17212e+08	3.13595e+08	3.5828e+08	2.37001e+08	3.72222e+08	2.09879e+08	4.16567e+08	2.93231e+08	357461236	1.43564e+08	3.98122e+08	2.30697e+08	3.11399e+08	2.76511e+08	3.03943e+08	7.96028e+08	3.26483e+08	2.14072e+08	324842749	4.76346e+08	1.3699e+08	2.89911e+08	2.40908e+08	4.23039e+08	1.73001e+08	4.32533e+08	380892710	3.87095e+08	1.92876e+08	168858340	1.62129e+08	267291091	1.77381e+08
A0A024R0A8	Adenosylhomocysteinase	AHCYL1	FGFR2-AHCYL1;AHCY;AHCYL1;AHCYL2	3.09884e+07	3.44743e+07	2.64226e+07	5.09525e+07	3.83088e+07	4.7652e+07	3.46281e+07	4.2234e+07	2.87784e+07	3.83941e+07	4.67469e+07	3.05811e+07	3.15814e+07	3.99129e+07	8.78672e+07	4.85945e+07	2.47195e+07	4.34819e+07	3.28547e+07	6.68539e+07	5.28253e+07	6.53044e+07	3.81996e+07	3.59212e+07	3.15263e+07	3.3279e+07	3.15005e+07	3.89057e+07	4.3614e+07	3.71305e+07	1.90295e+07	4.32466e+07	4.33401e+07	2.52623e+07	4.21446e+07	3.4733e+07	3.715e+07	2.85552e+07	4.21845e+07	4.3284e+07	4.23226e+07	3.94819e+07	2.34973e+07	2.20113e+07	3.21279e+07	2.21391e+07
Q96HN2	Adenosylhomocysteinase 3	AHCYL2	FGFR2-AHCYL1;AHCY;AHCYL1;AHCYL2	9.42738e+06	2.39433e+06	1.57819e+07	3.1416e+07	3.09829e+07	1.25594e+07	1.89737e+07	2.60332e+07	2.64931e+07	2.87194e+07	3.45068e+07	5.53004e+06	7.93917e+06	1.5271e+07	2.0563e+07	8.25409e+06	1.27511e+07	3.1393e+07	8.29706e+06	2.50535e+07	2.88114e+07	2.50735e+07	1.59078e+07	7.91408e+06	1.55e+07	2.19947e+07	2.49604e+07	1.76032e+07	1.9003e+07	3.93443e+06	4.15338e+06	2.37415e+07	1.2801e+07	1.9091e+07	1.01879e+07	6.38664e+06	6.38602e+06	1.7927e+07	2.18637e+07	5.18844e+06	1.63468e+07	4.66405e+06	6.97748e+06	6.03218e+06	1.0695e+07	1.185e+06
Q09666	Neuroblast differentiation-associated protein AHNAK	AHNAK	AHNAK;NRIP1	6928316331	6522455363	13178626397	9892655512	7735182448	9631654776	9275723084	7162633122	6019701612	6749912935	5647236825	6267670553	8106161764	7774583028	7283022226	7589463014	7038251361	6541269845	9526798688	5843545338	9257253903	7413597158	6311863253	5661248944	13820676191	11553311327	15480971642	6737221144	4020845193	8095038263	6819980669	7269026188	7237589065	8028618336	8574694093	6551559682	8691355856	7176289595	5247501561	7086372984	7980327457	10720565338	6580898648	12184260716	9296456773	8220740935
Q8IVF2	Protein AHNAK2	AHNAK2	AHNAK2	2.41366e+08	3.73227e+08	441572986	3.68761e+08	2.62309e+08	3.69181e+08	405193832	9.61151e+08	2.8846e+08	2.97066e+08	3.77359e+08	3.17658e+08	294522962	3.75992e+08	3.58253e+08	2.82186e+08	2.86476e+08	3.08876e+08	3.14794e+08	4.28893e+08	3.94082e+08	4.0103e+08	7.09661e+08	6.00968e+08	2.44305e+08	3.56241e+08	3.10272e+08	2.46211e+08	2.70632e+08	3.75529e+08	4.07441e+08	4.86942e+08	3.82531e+08	3.54336e+08	3.16585e+08	5.90879e+08	4.50956e+08	5.41439e+08	2.13019e+08	2.76903e+08	2.80699e+08	2.95716e+08	3.90213e+08	3.75176e+08	3.60293e+08	3.64109e+08
P35869	Aryl hydrocarbon receptor	AHR	AHR	1.31087e+06	1.21105e+06	0	919678	1.57204e+06	7.85879e+06	1.77781e+06	0	1.21096e+06	2.48723e+06	899704	0	1.14125e+06	3.46856e+06	4.6156e+06	2.14329e+06	1.1382e+06	0	1.37633e+06	744100	2.32473e+06	1.65706e+06	0	3.71552e+06	1.08561e+06	882233	985193	1.70511e+06	1.86727e+06	3.34383e+06	1.46839e+06	2.63167e+06	3.32079e+06	2.08114e+06	1.35296e+06	2.50582e+06	1.67113e+06	1.66771e+06	720147	1.14048e+06	1.11675e+06	2.33593e+06	1.35752e+06	1.71281e+06	830216	1.94548e+06
O95433	Activator of 90 kDa heat shock protein ATPase homolog 1	AHSA1	AHSA1	257243214	3.39572e+08	2.34121e+08	3.27798e+08	2.78278e+08	2.12558e+08	4.00685e+08	2.00855e+08	2.12526e+08	2.41034e+08	3.25049e+08	2.45761e+08	4.17821e+08	2.02923e+08	2.10309e+08	2.99825e+08	1.9223e+08	1.90855e+08	167613155	2.92676e+08	2.75237e+08	2.54791e+08	3.34478e+08	1.79123e+08	2.24496e+08	3.1559e+08	3.28154e+08	3.13695e+08	3.03809e+08	2.97911e+08	2.3018e+08	327377502	3.75455e+08	2.45813e+08	3.37482e+08	3.63938e+08	5.36798e+08	4.58206e+08	5.40596e+08	418161138	3.88722e+08	1.69008e+08	228569151	2.47491e+08	336902317	2.58178e+08
P02765	Alpha-2-HS-glycoprotein	AHSG	AHSG	5.30722e+08	2.78951e+08	4.10253e+08	3.52535e+08	1.71009e+08	2.97897e+08	1.92937e+08	2.17623e+08	2.56738e+08	199962765	2.9266e+08	4.00172e+08	213969771	1.99303e+08	2.49425e+08	2.63732e+08	3.29059e+08	199668141	3.03758e+08	1.95401e+08	2.06008e+08	1.71695e+08	6.48727e+08	4.09615e+08	4.24188e+08	2.9275e+08	272334733	285195900	1.59989e+08	1.92573e+08	4.2427e+08	4.49093e+08	1.61453e+08	4.7497e+08	2.42339e+08	5.52716e+08	2.62699e+08	2.42206e+08	1.88808e+08	3.87187e+08	2.42977e+08	9.33198e+08	1023266602	5.79353e+08	517370896	6.43461e+08
Q96BJ3	Axin interactor, dorsalization-associated protein	AIDA	AIDA	1.89402e+07	3.0366e+07	1.97901e+07	1.74964e+07	2.66183e+07	1.34588e+07	3.30511e+07	1.61848e+07	1.39324e+07	3.70194e+07	2.00656e+07	1.63295e+07	1.08773e+07	3.37576e+07	2.43024e+07	1.94298e+07	1.6478e+07	3.37817e+07	3.36363e+07	23789365	2.37659e+07	3.08828e+07	2.47348e+07	1.90754e+07	3.34479e+07	2.28379e+07	2.27165e+07	1.97566e+07	2.5255e+07	3.1064e+07	1.50737e+07	3.23287e+07	3.88698e+07	1.30716e+07	1.5097e+07	3.39349e+07	4.53762e+07	3.70189e+07	2.70498e+07	1.47436e+07	1.90966e+07	8.53064e+06	9.13405e+06	2.54927e+07	9.08612e+06	1.44339e+07
Q5STX8	Allograft inflammatory factor 1 (Fragment)	AIF1	AIF1	1.63918e+07	3.67328e+07	12332380	1.98869e+07	2.48833e+07	1.35878e+07	3.21522e+07	1.95404e+07	2.98864e+07	5.54416e+07	6.91511e+07	3.7105e+07	3.5008e+07	4.07939e+07	5.6601e+07	5.30617e+07	3.29172e+07	3.04986e+07	2.65846e+07	3.66965e+07	2.43429e+07	2.92663e+07	4.46014e+07	3.59343e+07	3.57118e+07	1.77163e+07	4.18823e+07	5.31716e+07	5.25613e+07	5.52899e+07	2.15752e+07	4.96673e+07	7.23459e+07	2.60775e+07	3.98936e+07	6.29632e+07	9.78354e+07	8.35455e+07	1.36651e+08	6.79237e+07	4.54108e+07	2.26116e+07	2.58925e+07	2.59665e+07	2.19096e+07	2.43148e+07
Q9BQI0	Allograft inflammatory factor 1-like	AIF1L	AIF1L	694727	3.14515e+06	2.13629e+06	630048	0	0	0	0	3.63656e+06	6.49511e+06	920907	2.49067e+06	2.60637e+06	0	892980	1.00909e+06	0	6.48367e+06	1.70508e+06	2.03375e+06	3.611e+06	2.19458e+06	1.72611e+06	0	2.09994e+06	1.91513e+06	3.10406e+06	3.54201e+06	5.18661e+06	2.15855e+06	2.82039e+06	1.86942e+06	4.77142e+06	0	2.27562e+06	3.02543e+06	2.24422e+06	1.43071e+06	6.76893e+06	0	2.61094e+06	1.29999e+06	2.95772e+06	0	2.16989e+06	0
O95831	Apoptosis-inducing factor 1, mitochondrial	AIFM1	AIFM1	4.97963e+07	1.59568e+08	5.35457e+07	2.37962e+08	1.08238e+08	1.51477e+08	1.45943e+08	1.68538e+08	211213697	1.60086e+08	1.81058e+08	9.52011e+07	1.25529e+08	1.22261e+08	1.38249e+08	1.08878e+08	1.67638e+08	1.38982e+08	2.51056e+08	1.94119e+08	9.12392e+07	2.07489e+08	6.1287e+07	1.01579e+08	2653796329	9.56081e+07	1.24069e+08	2.09815e+08	2.16847e+08	8.63771e+07	1.03191e+08	1.24472e+08	1.23044e+08	2.61936e+07	6.63364e+07	1.11275e+08	9.97928e+07	1.57996e+08	1.92362e+08	1.15239e+08	1.76667e+08	4.4194e+07	9.14668e+07	3.08722e+07	1.22416e+08	6.55108e+07
Q9BRQ8	Ferroptosis suppressor protein 1	AIFM2	AIFM2	0	0	0	0	0	0	0	0	0	0	1.26845e+06	0	0	0	0	0	0	0	0	0	0	0	0	0	0	0	0	0	0	0	0	889715	0	0	0	0	1.31996e+06	0	2.85548e+06	0	0	0	0	0	0	0
Q12904	Aminoacyl tRNA synthase complex-interacting multifunctional protein 1	AIMP1	AIMP1	1.28272e+08	9.19044e+07	1.52938e+08	2.02636e+08	1.7145e+08	1.56062e+08	1.42496e+08	1.47871e+08	1.2683e+08	1.53216e+08	8.97812e+07	1.13276e+08	1.77759e+08	2.05446e+08	1.14306e+08	1.1491e+08	1.27537e+08	1.05708e+08	1.9433e+08	115757594	2.21864e+08	1.25676e+08	8.11172e+07	1.17647e+08	1.80325e+08	2.11363e+08	2.55106e+08	1.23265e+08	9.07994e+07	1.09424e+08	1.04072e+08	9.15868e+07	1.04685e+08	8.15255e+07	1.7057e+08	6.99589e+07	8.24497e+07	5.81175e+07	121755588	1.34525e+08	1.20681e+08	2.14585e+08	1.23495e+08	1.70569e+08	1.54869e+08	1.25222e+08
Q13155	Aminoacyl tRNA synthase complex-interacting multifunctional protein 2	AIMP2	AIMP2	7.01091e+06	1.37356e+07	2.11359e+07	2.23746e+07	2.78141e+07	2.73455e+07	2.42792e+07	2.14822e+07	2.25421e+07	3.4558e+07	1.72911e+07	3.01612e+07	8.26205e+06	2.14932e+07	1.77076e+07	2.86521e+07	1.21399e+07	1.76632e+07	1.03205e+07	2.98784e+07	2.86735e+07	2.43391e+07	1.08653e+07	2.58859e+07	3.00562e+07	2.55036e+07	3.21855e+07	1.56624e+07	3.34423e+07	1.12951e+07	1.03e+07	2.01364e+07	1.94183e+07	6.60766e+06	1.17073e+07	1.15972e+07	1.59479e+07	1.59352e+07	1.57807e+07	6.69316e+06	1.50708e+07	1.28263e+07	7.36641e+06	1.12824e+07	1.0398e+07	8.31013e+06
D0EKE5	Peptidylprolyl isomerase	AIP	AIP	6.29548e+06	1.36071e+07	1.20622e+07	1.84047e+07	1.65799e+07	9.75027e+06	1.78927e+07	9.25013e+06	1.16844e+07	1.57855e+07	1.68692e+07	2.02008e+07	7.72198e+06	1.46113e+07	1.08926e+07	1.28644e+07	1.35655e+07	1.49948e+07	8.38574e+06	1.12574e+07	1.24524e+07	1.37839e+07	5.03973e+06	1.29211e+07	1.41246e+07	1.74627e+07	1.43842e+07	6.30792e+06	1.9294e+07	1.20169e+07	5.4395e+06	1.14648e+07	1.40077e+07	3.9771e+06	5.21724e+06	3.72572e+06	9.03679e+06	4.08519e+06	1.49912e+07	8.57919e+06	1.16716e+07	9.74964e+06	1.81668e+06	5.73397e+06	8.03818e+06	3.07131e+06
D2CVN5	Aryl hydrocarbon receptor-interacting protein AIP722	AIP	AIP	4.76674e+06	0	0	1.50979e+07	5.581e+06	0	1.59577e+07	1.72313e+07	1.03098e+07	1.0976e+07	0	1.48832e+07	2.62726e+06	1.1569e+07	8.21476e+06	6.42175e+06	5.84519e+06	5.13441e+06	5.45932e+06	8466646	8.61384e+06	8.16142e+06	3.34722e+06	3.23504e+06	5.5543e+06	6.35421e+06	1.29556e+07	0	0	4.9002e+06	3.83278e+06	4.57207e+06	4.05098e+06	0	4.57578e+06	0	4.4987e+06	3.87717e+06	3.57918e+06	0	7.44989e+06	5.75463e+06	3.32044e+06	0	1.84449e+06	0
Q6FGX9	Adenylate kinase isoenzyme 1	AK1	AK1;AK5	3.13918e+08	2.02013e+08	2.88695e+08	2.5245e+08	2.07166e+08	2.34635e+08	233302532	2.65064e+08	3.85189e+08	2.64715e+08	1.84209e+08	1.35931e+08	2.29077e+08	2.77671e+08	234948276	1.86918e+08	1.93443e+08	5.57859e+08	3.41649e+08	2.54229e+08	3.36936e+08	2.30687e+08	2.3389e+08	1.93632e+08	3.25675e+08	3.08884e+08	3.0378e+08	2.2888e+08	3.35429e+08	2.49363e+08	3.35146e+08	2.89038e+08	1.78194e+08	2.18357e+08	2.50893e+08	2.22994e+08	2.10473e+08	2.06681e+08	1.23348e+08	2.00962e+08	2.66915e+08	254082046	1.77868e+08	2.76571e+08	2.17656e+08	2.11196e+08
A0A140VK93	Adenylate kinase 2, mitochondrial	AK2	AK2	1.60128e+08	1.55605e+08	3.6316e+08	4.57026e+08	2.58901e+08	3.06482e+08	6.37295e+08	3.84381e+08	3.06263e+08	3.38069e+08	2.44807e+08	2.41722e+08	3.51442e+08	2.39498e+08	253185584	1.97448e+08	4.62436e+08	280892948	1.88534e+08	2.70738e+08	3.68821e+08	3.87536e+08	2.31362e+08	1.31704e+08	2.27262e+08	4.47719e+08	4.20449e+08	3.02151e+08	191424870	1.12848e+08	1.7875e+08	2.89029e+08	2.11982e+08	1.3209e+08	4.5048e+08	1.68568e+08	1.7976e+08	1.69666e+08	2.08722e+08	1.95994e+08	3.69774e+08	1.6905e+08	1.2352e+08	1.87933e+08	3.88093e+08	1.10689e+08
Q9UIJ7	GTP:AMP phosphotransferase AK3, mitochondrial	AK3	AK3	3.41989e+07	9.96446e+07	1.08316e+08	1.51623e+08	1.22281e+08	1.06178e+08	1.72309e+08	1.33801e+08	1.35812e+08	1.50096e+08	1.08749e+08	1.04124e+08	7.07749e+07	1.03457e+08	1.18803e+08	1.30173e+08	1.33552e+08	1.37601e+08	1.13773e+08	1.21773e+08	111880619	1.03209e+08	1.18292e+08	1.30034e+08	8.30278e+07	135795440	1.44596e+08	1.24166e+08	1.01812e+08	1.98664e+08	9.4724e+07	2.00458e+08	1.48138e+08	4.87456e+07	9.94316e+07	6.04106e+07	2.77469e+08	1.42326e+08	2.16937e+08	7.87204e+07	126937299	5.26874e+07	4.18203e+07	6.7921e+07	6.77706e+07	5.78406e+07
P27144	Adenylate kinase 4, mitochondrial	AK4	AK4	3.83464e+07	2.97002e+07	2.27559e+07	1.37648e+07	1.06122e+07	2.90703e+07	1.48057e+07	2.24293e+07	1.38825e+07	2.15919e+07	4.34712e+07	3.42675e+07	4.27797e+07	2.20883e+07	3.38873e+07	3.27934e+07	4.81112e+07	2.40356e+07	3.61799e+07	3.41063e+07	3.13734e+07	6.00817e+07	7.25922e+07	4.9549e+07	3.91808e+07	2.30427e+07	2.29569e+07	4.73299e+07	2.59349e+07	4.83982e+07	3.11999e+07	4.53773e+07	4.71103e+07	3.70985e+07	3.41653e+07	4.96052e+07	4.26009e+07	9.17461e+07	2.68659e+07	4.73984e+07	3.39652e+07	5.21923e+07	5.47026e+07	3.98371e+07	4.89603e+07	3.84947e+07
Q9Y3D8	Adenylate kinase isoenzyme 6	AK6	AK6	0	0	0	581188	0	0	0	0	0	0	0	0	0	0	0	0	0	0	0	0	0	0	0	824002	0	0	0	0	3.16729e+06	0	0	0	806859	0	0	0	949801	790301	0	0	0	0	0	0	605672	0
G3V365	Adenylate kinase 7	AK7	AK7	4.7924e+08	2.58923e+08	4.91311e+07	2.27555e+07	1.82924e+07	4.48521e+07	2.4216e+07	7.87931e+07	4.5904e+08	8.91248e+07	6.08912e+07	2.8108e+08	3.41838e+08	3.49047e+08	3.12757e+08	7.29955e+07	4.81287e+08	5.21008e+08	598292803	2.22015e+07	5.36738e+07	3.33609e+07	2.5497e+07	4.15321e+07	9.5433e+06	7.22939e+07	2.70207e+07	4.17124e+08	9.79732e+07	3.49707e+08	7.01828e+08	1.76489e+08	1.78237e+08	7.79059e+08	6.49647e+08	3.55887e+08	7.31726e+07	2.79173e+07	1.81687e+08	4.22756e+08	1.96284e+08	3.10062e+08	2.32753e+08	1.82258e+08	3.49533e+08	6.38816e+08
Q02952	A-kinase anchor protein 12	AKAP12	DKFZp686M0430;AKAP12	6.0837e+07	1.22562e+08	1.16813e+08	1.19328e+08	1.14195e+08	1.13735e+08	1.19555e+08	7.83925e+07	7.80552e+07	7.56735e+07	8.76592e+07	7.52078e+07	1.88525e+08	9.00885e+07	6.53117e+07	9.42585e+07	5.66243e+07	7.04207e+07	7.94186e+07	5.53621e+07	7.23383e+07	8.26107e+07	7.63085e+07	6.84656e+07	9.8309e+07	9.58089e+07	1.07708e+08	1.0211e+08	9.48248e+07	1.11685e+08	1.23884e+08	116886876	1.44979e+08	9.82657e+07	1.72525e+08	1.46255e+08	171986424	1.37365e+08	1.33916e+08	1.91311e+08	1.33207e+08	5.24961e+07	7.43706e+07	8.63884e+07	101114586	1.13234e+08
A0A2X0SF55	AKAP13 (Fragment)	AKAP13	AKAP13	5.88822e+07	4.64615e+07	3.47931e+07	5.35427e+07	3.26195e+07	4.58697e+07	7.39178e+07	5.52808e+07	4.67558e+07	6.41062e+07	5.27984e+07	5.02772e+07	4.71435e+07	5.26036e+07	5.76953e+07	6.97997e+07	3.47665e+07	5.18027e+07	4.14282e+07	5.53551e+07	4.811e+07	4.72446e+07	6.78868e+07	3.50793e+07	4.15001e+07	4.77966e+07	4.96354e+07	5.18725e+07	7.24911e+07	5.60268e+07	4.6724e+07	5.19197e+07	6.54522e+07	4.77458e+07	4.3416e+07	3.69812e+07	5.48583e+07	5.67432e+07	1.05507e+08	6.44432e+07	4.09575e+07	4.73398e+07	1.95532e+07	3.20665e+07	2.54304e+07	3.604e+07
Q9Y2D5	A-kinase anchor protein 2	AKAP2	PALM2AKAP2;hCG_28765;AKAP2	0	0	1.26477e+06	1.50228e+06	1.57646e+06	0	0	0	0	0	0	1.12533e+06	817803	0	3.85856e+06	0	1.67358e+06	1.22081e+06	1.17444e+06	0	2.38421e+06	2.26396e+06	0	1.20558e+06	1.49437e+06	1.75715e+06	1.96977e+06	0	0	1.17601e+06	0	1.44197e+06	0	0	0	722094	1.26109e+06	1.63695e+06	0	1.16621e+06	1.10327e+06	2.50947e+06	3.27182e+06	3.01497e+06	1.235e+06	667414
Q8NE02	AKAP8 protein	AKAP8	DKFZp586B1222;AKAP8	0	0	1.98831e+06	2.82393e+06	3.52357e+06	1.98586e+06	4.43222e+06	3.40734e+06	3.4448e+06	3.80296e+06	3.57072e+06	3.79013e+06	2.29823e+06	0	1.21095e+06	2.26164e+06	1.30632e+06	4.57825e+06	3.18032e+06	0	4.36363e+06	1.54056e+06	0	0	2.13565e+06	3.53716e+06	3.72819e+06	2.14428e+06	0	2.03372e+06	0	0	3.79955e+06	2.72616e+06	2.66692e+06	0	1.03182e+06	0	6.22031e+06	4.70833e+06	0	3.32149e+06	2.39861e+06	3.34408e+06	2.19758e+06	3.56046e+06
A0A0A0MRF6	A-kinase anchor protein 9	AKAP9	AKAP9;DKFZp564G2263	5.41508e+07	6.16231e+07	4.62883e+07	5.36942e+07	5.03399e+07	5.14275e+07	3.93312e+07	3.75647e+07	5.19087e+07	6.68245e+07	6.72725e+07	5.98283e+07	4.12939e+07	4.83575e+07	7.51126e+07	7.18291e+07	6.86933e+07	5.39025e+07	5.55418e+07	4.962e+07	5.45006e+07	8.45383e+07	6.92163e+07	1.92664e+08	3.62578e+07	4.00415e+07	3.65045e+07	5.41453e+07	4.39923e+07	5.57081e+07	4.62186e+07	9.06811e+07	6.89131e+07	8.28652e+07	4.57488e+07	6.377e+07	5.6919e+07	1.01893e+08	8.66437e+07	7.73692e+07	7.00367e+07	7.55461e+07	7.27223e+07	5.36295e+07	6.29147e+07	6.92222e+07
P14550	Aldo-keto reductase family 1 member A1	AKR1A1	AKR1B1;AKR1A1;AKR1E2	155883001	5.22938e+08	1.23142e+08	2.41608e+08	1.88859e+08	1.92713e+08	2.76373e+08	231490207	3.16162e+08	5.34883e+08	3.3321e+08	326538355	2.33397e+08	3.20654e+08	3.65725e+08	3.24438e+08	266887836	2.21756e+08	2.04446e+08	3.43716e+08	2.7928e+08	3.25982e+08	1.87273e+08	2.03134e+08	1.38538e+08	211271786	2.10504e+08	3.69277e+08	4.31501e+08	3.00835e+08	1.77727e+08	294805038	4.38353e+08	1.17578e+08	3.69209e+08	3.33085e+08	368540375	330530065	4.48434e+08	3.30578e+08	476105115	1.96929e+08	2.33949e+08	1.73251e+08	1.98639e+08	2.15756e+08
P15121	Aldo-keto reductase family 1 member B1	AKR1B1	AKR1B1;AKR1A1;LOC402299;AKR1B15	2.9285e+08	6.90478e+08	165498110	3.48109e+08	2.73781e+08	121114765	2.9298e+08	2.27178e+08	1.90247e+08	2.68227e+08	4.71494e+08	3.81642e+08	2.87194e+08	3.78757e+08	3.89092e+08	2.56192e+08	2.00428e+08	1.52812e+08	2.57841e+08	2.48356e+08	3.82051e+08	3.07255e+08	3.91611e+08	2.26756e+08	1.88938e+08	2.69226e+08	2.62738e+08	5.88879e+08	2.21418e+08	173562601	1.45882e+08	3.35844e+08	4.42298e+08	1.14954e+08	2.17471e+08	330523703	548741905	1.85494e+08	3.03797e+08	6.55566e+08	663464341	2.68401e+08	3.28102e+08	3.02674e+08	2.01292e+08	2.22521e+08
O60218	Aldo-keto reductase family 1 member B10	AKR1B10	AKR1B10;LOC402299;AKR1B15	4.99469e+06	2.23063e+07	1.69186e+07	2.05367e+07	1.80469e+07	1.02315e+07	1.84788e+07	1.64745e+07	1.50088e+07	1.72057e+07	1.45509e+07	6.26908e+07	1.59821e+07	1.09154e+07	9.80681e+06	1.41199e+07	1.17545e+07	1.164e+07	9.02256e+06	2.20624e+07	1.69087e+07	1.90278e+07	1.35965e+07	1.13935e+07	1.24736e+07	2.24974e+07	1.81706e+07	8.82223e+06	1.20042e+07	8.0907e+06	1.81213e+07	1.05999e+07	2.39268e+07	6.65709e+06	2.64041e+07	8.75728e+06	1.69701e+07	2.84365e+07	1.98958e+07	1.69125e+07	1.64864e+07	1.23815e+07	7.18186e+06	1.39916e+07	1.0934e+07	1.3771e+07
Q04828	Aldo-keto reductase family 1 member C1	AKR1C1	AKR1C8P;AKR1D1;AKR1C4;AKR1C1;AKR1C2;AKR1C3	141988	0	0	2.10319e+07	9.05333e+06	1.08125e+07	2.6165e+06	7.92097e+06	5.20692e+07	0	9.15525e+06	7.87157e+07	4.91833e+06	5.24115e+06	0	3.48957e+06	8.2137e+06	2.86395e+06	722911	3.78116e+06	8.79529e+06	4.73118e+06	2.12264e+06	0	4.10503e+06	0	4.74408e+06	7.28573e+06	9.26699e+06	744220	2.18816e+06	4.86242e+06	0	2.44413e+06	2.06901e+06	4.73688e+06	5.26592e+06	1.00508e+07	6.49387e+06	4.86514e+06	3.99628e+07	1.9632e+06	2.58613e+06	1.99318e+06	0	6.40601e+06
P52895	Aldo-keto reductase family 1 member C2	AKR1C2	AKR1C4;AKR1C8P;AKR1C1;AKR1C2;AKR1C3	0	1.75502e+07	1.5128e+07	1.92959e+08	1.40194e+07	4.73714e+06	9.18173e+06	4.16127e+06	2.14305e+07	1.77762e+07	7.1722e+07	2.63738e+08	1.76471e+07	1.11218e+07	3.7721e+06	1.80318e+07	1.09256e+08	5.48194e+06	7.96514e+06	8065710	2.28793e+07	1.48282e+07	1.26629e+07	1.64545e+07	6.34534e+06	7.76587e+06	1.07803e+07	6.7467e+06	2.50954e+07	7.56356e+06	0	9.28158e+06	7.19074e+06	0	0	1.6463e+07	2.20855e+07	7.86124e+06	2.20661e+07	0	8.85769e+07	3.41377e+06	718875	4.38746e+06	0	1.20417e+07
A0A0A0MSS8	Aldo-keto reductase family 1 member C3	AKR1C3	AKR1C8P;AKR1D1;AKR1C4;AKR1C1;AKR1C2;AKR1C3	1.79357e+07	9.09307e+07	1.86389e+07	1.67838e+07	2.00699e+07	7.26922e+06	7.74155e+06	1.42402e+07	5.55915e+07	3.29914e+07	3.38513e+07	5.99154e+07	1.63038e+07	1.50198e+07	1.27789e+07	1.63486e+07	2.14022e+07	1.83907e+07	1.36932e+07	2.53659e+07	3.50594e+07	12917247	9.09065e+06	6.13573e+06	2.81001e+07	6.6798e+06	2.83269e+07	4.11424e+07	2.10318e+07	1.03256e+07	8.24098e+06	2.7913e+07	1.00303e+07	9.68047e+06	1.07864e+07	4.24276e+07	2.1874e+07	1.28911e+07	3.4574e+07	6.15777e+06	8.14041e+07	1.48921e+07	9.45203e+06	1.05451e+07	1.19224e+07	1.83022e+07
O43488	Aflatoxin B1 aldehyde reductase member 2	AKR7A2	AKR7A2;AKR7L	1.87241e+07	5.30247e+07	1.74659e+07	3.77416e+07	1.76906e+07	1.70766e+07	3.26877e+07	1.77707e+07	5.89301e+07	6.66467e+07	5.11896e+07	4.24361e+07	3.73473e+07	4.51752e+07	4.93229e+07	3.38118e+07	26903993	4.73403e+07	1.1177e+07	3.30979e+07	2.1833e+07	4.09759e+07	2.69607e+07	4.79963e+07	1.59352e+07	1.42518e+07	3.48228e+07	3.6373e+07	4.41468e+07	4.03784e+07	1.83135e+07	1.74891e+07	5.15318e+07	8.77501e+06	2.03316e+07	5.39218e+07	4.744e+07	3.27868e+07	2.54721e+07	3.70871e+07	5.47833e+07	2.89079e+07	2.11817e+07	1.69092e+07	1.09012e+07	2.74488e+07
B0LPE5	RAC-PK-alpha	AKT1	AKT1;AKT2;AKT3;RPS6KB1;RPS6KB2	2.20315e+07	3.59027e+07	6.15527e+07	2.06433e+07	5.40169e+07	5.37872e+07	1.84928e+07	5.77591e+07	6.1791e+07	2.87403e+07	4.11529e+07	2.16288e+07	2.55322e+07	3.42813e+07	3.9312e+07	3.23643e+07	3.36773e+07	3.75238e+07	6.4041e+07	3.79542e+07	4.38713e+07	2.82399e+07	2.88593e+07	2.53092e+07	2.24566e+07	4.34973e+07	3.36449e+07	3.00678e+07	2.52555e+07	3.54842e+07	4.46561e+07	3.12358e+07	3.29072e+07	2.31563e+07	7.03634e+07	2.5855e+07	2.0366e+07	2.96279e+07	1.67445e+07	2.9563e+07	5.37813e+07	2.63443e+07	1.53811e+07	2.27097e+07	1.76925e+08	2.93003e+07
P31751	RAC-beta serine/threonine-protein kinase	AKT2	AKT1;AKT2;AKT3;RPS6KB1;RPS6KB2	2.18792e+07	3.3219e+06	4.95402e+06	737263	1.58264e+06	2.91276e+06	0	3.21391e+06	7.28102e+06	1.54939e+06	1.26061e+06	3.84865e+06	0	3.80976e+06	6.01817e+06	759487	9.31633e+06	4.36611e+06	1.05795e+07	2.63268e+06	3.31245e+06	2.07446e+06	2.77878e+06	1.16234e+06	7.58221e+06	2.98847e+06	1.85578e+06	4.72828e+06	2.85654e+06	5.89157e+06	1.20207e+07	3.04277e+06	2.08406e+06	1.89543e+07	1.17981e+07	3.17213e+06	1.90379e+06	0	2.95721e+06	5.20545e+06	4.36399e+06	1.42158e+07	2.73934e+06	8.3083e+06	2.05645e+07	6.16267e+06
P13716	Delta-aminolevulinic acid dehydratase	ALAD	ALAD	2.0102e+07	1.2455e+07	1.2872e+07	2.54498e+07	1.33351e+07	1.9365e+07	1.90575e+07	1.8363e+07	2.05147e+07	1.75232e+07	1.8414e+07	1.53312e+07	1.02406e+07	1.24322e+07	2.79195e+07	2.22619e+07	1.84944e+07	1.42849e+07	1.74193e+07	2.48267e+07	2.75025e+07	2.68873e+07	1.45562e+07	1.69799e+07	2.09415e+07	2.04072e+07	1.88906e+07	1.38397e+07	2.05184e+07	1.30986e+07	9.45012e+06	1.90791e+07	1.82749e+07	1.3123e+07	1.5336e+07	1.39117e+07	1.03472e+07	9.10139e+06	1.64646e+07	1.47898e+07	2.15394e+07	2.06086e+07	1.08324e+07	1.2282e+07	2.47116e+07	8.11736e+06
P02768	Albumin	ALB	ALB	248862428	3.04072e+08	4.72111e+08	3.11903e+08	300689184	2.19505e+08	6.17472e+08	7.28083e+08	2.25873e+08	5.00053e+08	7.01411e+08	3.86856e+08	1.6704e+08	3.62393e+08	5.54429e+08	3.8033e+08	2.31874e+08	2.16094e+07	3.11308e+08	5.12116e+08	3.35355e+08	5.36564e+08	2.62332e+08	4.40576e+08	2.32334e+08	580662383	3.54678e+08	4.20245e+08	2.60037e+08	2.27664e+08	2.59717e+08	4.46214e+08	2.48617e+08	4.31762e+08	2.23205e+08	5.40846e+08	1019105046	7.06348e+08	3.10928e+07	1.89372e+08	4.3818e+08	521522140	7.38002e+08	3.8097e+08	4.06227e+08	4.77749e+08
A0A087WWT3	Albumin	ALB	ALB	0	0	0	0	0	0	0	0	0	0	0	0	0	0	0	0	0	0	0	0	0	0	0	0	0	0	0	0	0	0	0	0	0	0	0	0	0	0	0	0	0	2.68472e+06	1.36438e+06	1.59508e+06	0	0
Q13740	CD166 antigen	ALCAM	ALCAM	1.90744e+07	3.62535e+07	2.46303e+07	5.79429e+07	9.40074e+07	4.74225e+07	2.93764e+07	5.62671e+07	7.78785e+07	8.36316e+07	4.97825e+07	4.22473e+07	3.32795e+07	5.08676e+07	3.28201e+07	1.23279e+08	8.92123e+07	5.02146e+07	5.34013e+07	4.09206e+07	4.85495e+07	4.18328e+07	2.84925e+07	3.57944e+07	4.57963e+07	4.29663e+07	6.801e+07	4.79746e+07	3.15203e+08	2.87105e+07	2.29225e+07	3.79721e+07	5.00544e+07	1.58329e+07	1.98966e+07	1.79581e+07	1.96101e+07	1.99378e+07	3.68679e+07	5.44322e+07	3.11425e+07	3.27595e+07	1.545e+07	3.38225e+07	3.31036e+07	3.42572e+07
Q8IZ83	Aldehyde dehydrogenase family 16 member A1	ALDH16A1	ALDH16A1	1.04351e+08	178334325	117278685	2.33662e+08	2.41755e+08	1.18283e+08	2.03387e+08	1.83435e+08	2.86889e+08	1.75552e+08	1.98894e+08	2.80352e+08	1.5568e+08	2.19892e+08	2.00464e+08	1.37882e+08	1.79118e+08	2.31959e+08	1.20913e+08	2.62083e+08	2.1179e+08	2.1363e+08	1.40082e+08	1.97689e+08	1.37469e+08	1.64322e+08	1.75365e+08	2.48015e+08	2.28741e+08	1.53789e+08	1.61829e+08	1.18751e+08	2.60031e+08	1.15654e+08	1.90565e+08	1.78336e+08	2.87757e+08	1.88373e+08	1.04209e+08	1.23634e+08	2.21963e+08	1.27991e+08	1.40707e+08	1.28862e+08	1.37881e+08	1.57308e+08
P54886	Delta-1-pyrroline-5-carboxylate synthase	ALDH18A1	ALDH18A1	1.04886e+08	2.44996e+08	4.92286e+07	1.06451e+08	1.3159e+08	132154687	1.80148e+08	8.08394e+07	1.87628e+08	2.03122e+08	2.03029e+08	1.36696e+08	1.36715e+08	1.62768e+08	1.71648e+08	1.63105e+08	1.75114e+08	2.17658e+08	1.51986e+08	3.38322e+08	1.69407e+08	2.26068e+08	1.02043e+08	3.03582e+08	1.03442e+08	1.42261e+08	1.10829e+08	2.11095e+08	307079264	1.61413e+08	1.21907e+08	2.48941e+08	2.4692e+08	9.35768e+07	1.32385e+08	184964362	2.30458e+08	2.29929e+08	310107222	1.94343e+08	1.60175e+08	7.81092e+07	1.16034e+08	1.03075e+08	122636067	129321122
H0YMG7	Retinal dehydrogenase 2	ALDH1A2	HEL-S-53e;HEL-9;ALDH2;DKFZp686G1675;ALDH1B1;ALDH1A2;ALDH1A3	0	1.82975e+06	0	3.68861e+06	1.93856e+06	0	0	0	0	1.248e+06	4.43564e+06	1.84129e+06	7.40769e+06	0	3.74033e+06	4.08816e+06	0	782377	1.45516e+06	955826	1.11591e+06	2.6693e+06	1.80391e+06	1.17002e+07	0	1.79434e+06	0	1.03241e+06	2.68748e+06	2.97025e+06	0	670784	4.60352e+06	1.13886e+07	0	8.81538e+06	2.93925e+06	5.36028e+06	0	3.81974e+06	0	0	0	0	2.83769e+06	2.89202e+06
P47895	Aldehyde dehydrogenase family 1 member A3	ALDH1A3	HEL-S-53e;HEL-9;ALDH2;DKFZp686G1675;ALDH1B1;ALDH1A2;ALDH1A3	4.60297e+07	1.23027e+08	2.37213e+08	6.10383e+07	5.4692e+07	7.14276e+07	7.5071e+07	5.84794e+07	7.03121e+07	1.00007e+08	1.08606e+08	8.56204e+07	9.66299e+07	118849239	1.26718e+08	1.0395e+08	1.33756e+08	4.58854e+07	7.18354e+07	9.05444e+07	6.07844e+07	1.50418e+08	4.06729e+07	2.69638e+08	4.96489e+07	5.75865e+07	6.55474e+07	1.45209e+08	103186903	1.41452e+08	5.37019e+07	1.68767e+08	9.21104e+07	7.63895e+07	4.82603e+07	1.59593e+08	1.41259e+08	2.83793e+08	2.06978e+08	1.30162e+08	8.5617e+07	1.96023e+08	9.72836e+07	4.60643e+07	5.69039e+07	8.98664e+07
P30837	Aldehyde dehydrogenase X, mitochondrial	ALDH1B1	HEL-S-53e;HEL-9;ALDH2;DKFZp686G1675;ALDH1B1;ALDH1A2;ALDH1A3	2.95054e+06	1.86318e+07	8.40804e+06	1.13586e+07	1.58251e+07	2.54771e+07	2.10358e+07	6.49879e+06	3.63125e+07	1.88468e+07	1.88963e+07	2.28631e+07	2.94284e+07	3.5988e+07	3.91105e+07	4.13111e+07	1.59936e+07	8.94138e+06	2.97617e+07	2.27688e+07	1.52806e+07	1.83691e+07	4.86914e+07	34631563	1.07757e+07	6.66446e+06	1.3112e+07	1.93896e+07	1.93415e+07	2.41761e+07	1.68157e+06	4.53047e+07	3.66711e+07	1.19378e+07	1.52948e+07	4.09712e+07	2.14388e+07	2.08071e+07	1.53518e+07	1.59366e+07	1.51542e+07	1.44287e+07	9.40905e+06	1.78787e+07	2.93356e+06	1.36346e+07
A0A494C1M4	10-formyltetrahydrofolate dehydrogenase	ALDH1L2	ALDH1L2;ALDH1L1;DKFZp434O2417	1.07794e+08	3.40699e+07	1.1279e+08	8.93128e+07	9.01137e+07	1.25152e+08	3.37869e+08	2.68849e+08	7.98305e+07	6.81439e+07	60310522	5.44173e+07	6.85779e+07	6.63511e+07	9.68588e+07	6.68018e+07	4.31454e+07	7.89453e+07	6.08254e+07	1.02295e+08	1.16538e+08	2.20737e+08	9.72213e+07	3.46733e+07	8.13971e+07	2.70579e+08	1.81658e+08	6.81447e+07	2.69315e+07	4.68204e+07	7.61243e+07	5.57081e+07	4.8857e+07	1.05267e+08	3.27805e+08	4.64011e+07	4.98368e+07	3.63269e+07	4.50146e+07	7.01008e+07	8.75102e+07	6.71022e+07	8.82911e+07	1.16255e+08	1.4021e+08	3.94663e+07
A0A384NPN7	Aldehyde dehydrogenase 2 family (Mitochondrial), isoform CRA_c	ALDH2	HEL-S-53e;HEL-9;ALDH2;DKFZp686G1675;ALDH1B1;ALDH1A1;ALDH1A2;ALDH1A3	5.61139e+08	1025692643	9.00408e+08	9.63315e+08	1044943732	6.24189e+08	1056267133	1078046447	7.86562e+08	7.84739e+08	5.34663e+08	9.44853e+08	4.23689e+08	7.8346e+08	7.14573e+08	546433222	1229218632	2215681210	774690581	4.78625e+08	8.89058e+08	5.87572e+08	4.04803e+08	8.667e+08	7.02641e+08	1027236584	5.44804e+08	5.52767e+08	5.4766e+08	7.69795e+08	7.00946e+08	6.49881e+08	1688355726	550286638	5.48781e+08	4.1031e+08	6.46336e+08	9.96095e+08	4.39676e+08	3.91265e+08	1668902349	1445301173	179426411	5.22481e+08	9.41027e+08	4.61625e+08
B0LUG2	ALDH2 (Fragment)	ALDH2	ALDH2	0	0	0	0	0	0	0	0	0	4.80615e+06	2.78572e+06	0	3.81651e+06	0	0	0	0	6.29637e+06	0	4724782	0	3.32739e+06	0	0	0	0	4.22958e+06	1.25274e+07	5.83109e+06	5.31837e+06	5.54015e+06	3.92359e+06	0	0	2.06185e+06	8.58187e+06	0	0	2.91478e+06	3.01764e+06	0	0	1.54194e+06	3.08203e+06	0	0
Q6PKA6	ALDH3A1 protein (Fragment)	ALDH3A1	ALDH3A2;ALDH3B2;ALDH3B1;ALDH3A1;DKFZp686E23276	6.54651e+06	2.16566e+07	6.35003e+06	8.87472e+06	1.5846e+07	1.06849e+07	1.64836e+07	1.52213e+07	1.79736e+07	2.12596e+07	2.40751e+07	3.87344e+07	2.18665e+07	2.18927e+07	2.33737e+07	2.26896e+07	1.20246e+07	1.69904e+07	3.71308e+07	1.67203e+07	1.00653e+07	1.54867e+07	8.30767e+06	1.50275e+07	6.36188e+06	9.39969e+06	1.03106e+07	1.84077e+07	2.75101e+07	1.79296e+07	7.06237e+06	2.28308e+07	1.83181e+07	4.75105e+06	7.82234e+06	1.90649e+07	1.6598e+07	1.94245e+07	2.50481e+07	1.29694e+07	7.32098e+08	5.58732e+06	8.49198e+06	2.66925e+06	9.48623e+06	9.79354e+06
P51648	Aldehyde dehydrogenase family 3 member A2	ALDH3A2	ALDH3A2;ALDH3B2;ALDH3B1;ALDH3A1;DKFZp686E23276	2314111808	1384214892	1657549306	1125635818	1063186629	1475730590	1076258569	1478325982	1286528915	1389443207	1508510860	1675113306	1613609898	1422030314	1215183786	1492041343	1538834779	1207020067	1789602420	1153133185	1523112073	1148590341	1387601162	1401481224	1779140120	1162840218	1158505563	1548322049	9.3253e+08	1519663578	1845477840	1439064583	1003637075	2175458898	1517383880	1687828660	1368504137	1235755991	1023430675	1649685934	1517564675	2563675989	2117388278	2426614372	2144143847	2176690052
P43353	Aldehyde dehydrogenase family 3 member B1	ALDH3B1	ALDH3A2;ALDH3B2;ALDH3B1;ALDH3A1;DKFZp686E23276	1.86961e+06	0	1.23426e+07	1.19611e+07	1.02487e+07	5.857e+06	4.15886e+06	3.96246e+06	6.30107e+06	4.17741e+06	7.05292e+06	7.00477e+06	1.03914e+07	5.49334e+06	4.12723e+06	5.28411e+06	6.44913e+06	1.83624e+06	1.34198e+07	1.52112e+06	7.02563e+06	1.29082e+06	2.75189e+06	3.30988e+06	1.62597e+07	1.2585e+07	1.64507e+07	1.13102e+07	679211	4.4823e+06	4.2607e+06	1.35798e+06	1.07759e+07	3.00191e+06	5.14922e+06	0	5.39913e+06	4.40135e+06	1.56188e+06	3.36459e+06	1.69472e+06	1.12007e+07	0	6.93148e+06	3.94534e+06	1.19677e+07
A0A024RAC7	Multifunctional fusion protein	ALDH4A1	ALDH4A1	9.1522e+07	1.95374e+08	1.38261e+08	1.89981e+08	1.75062e+08	1.60573e+08	2.53476e+08	2.29102e+08	2.2278e+08	1.72439e+08	3.03562e+08	2.02846e+08	186545721	2.62355e+08	1.44975e+08	1.72383e+08	1.6579e+08	1.32798e+08	1.61783e+08	2.09574e+08	2.08602e+08	2.06958e+08	7.91621e+07	8.84278e+07	9.42747e+07	2.06478e+08	1.86953e+08	1.65833e+08	1.37035e+08	1.75518e+08	1.32307e+08	1.58004e+08	1.80193e+08	1.41004e+08	1.84657e+08	1.88008e+08	1.6522e+08	155723904	1.39293e+08	187450855	2.36353e+08	1.2429e+08	1.49799e+08	1.40837e+08	1.13548e+08	1.72989e+08
X5D299	Succinate-semialdehyde dehydrogenase (Fragment)	ALDH5A1	ALDH5A1	0	6.24643e+06	3.21913e+06	1.06161e+07	1.84943e+06	4.75905e+06	5.99512e+06	4.52239e+06	6.76182e+06	4.85675e+06	2.0973e+06	1.57564e+06	2.42467e+06	0	3.10646e+06	1.30249e+06	0	1.22474e+07	2.33223e+06	6977530	6.74324e+06	9.56996e+06	2.56029e+06	2.03779e+06	0	2.4348e+06	4.36395e+06	6.95164e+06	6.35464e+06	9.64042e+06	2.79094e+07	5.50151e+06	1.95211e+06	1.67075e+07	1.68527e+06	1.2727e+06	1.34187e+06	3.32226e+06	7.39748e+06	8.55536e+06	4.88137e+06	1.21469e+06	9.22413e+06	0	9.68377e+06	1.22083e+07
X5DNC0	Aldehyde dehydrogenase 5 family member A1 isoform C (Fragment)	ALDH5A1	ALDH5A1	0	0	0	0	0	0	0	1.78495e+06	0	0	0	0	0	0	0	0	3.00007e+06	0	0	1.47523e+06	1.34115e+06	0	1.20126e+06	0	0	1.22375e+06	2.25111e+06	0	0	0	0	0	0	0	0	0	0	0	0	0	0	0	0	0	0	0
Q02252	Methylmalonate-semialdehyde dehydrogenase [acylating], mitochondrial	ALDH6A1	MMSADHA;ALDH6A1	2.11066e+08	3.0436e+08	1.35212e+08	3.60225e+08	1.62075e+08	1.61794e+08	2.2803e+08	2.82922e+08	2.16197e+08	2.44415e+08	2.75807e+08	1.7353e+08	1.2593e+08	2.17696e+08	1.76186e+08	1.8925e+08	2.76531e+08	2.22186e+08	1.93153e+08	2.33958e+08	1.83992e+08	1.6255e+08	9.7283e+07	2.24373e+08	1.54852e+08	1.74153e+08	1.93978e+08	1.82719e+08	2.56583e+08	152860354	1.67737e+08	1.41646e+08	1.6489e+08	1.57515e+08	1.73249e+08	1.42354e+08	1.7811e+08	1.20192e+08	1.69215e+08	1.87397e+08	2.77547e+08	1.37528e+08	1.08958e+08	105740539	1.45863e+08	1.78372e+08
A0A1B0GTG2	Alpha-aminoadipic semialdehyde dehydrogenase	ALDH7A1	ALDH7A1	4.89704e+06	6.92376e+06	5.4868e+06	8.1709e+06	5.9745e+06	3.81184e+06	3.36615e+06	1.07481e+07	1.67413e+07	9.55575e+06	5.21719e+06	6.65899e+06	5.32036e+06	1.03129e+07	6.5462e+06	4.09065e+06	9.25993e+06	2.38559e+06	2.11337e+06	4.67183e+06	6.91922e+06	3.48232e+06	2.54375e+06	0	6.4661e+06	6.17294e+06	8.70989e+06	6.12785e+06	0	3.49292e+06	2.57218e+06	6.09588e+06	2.2952e+06	2.34821e+06	6.11319e+06	4.71573e+06	4.57727e+06	3.80453e+06	7.69717e+06	2.62487e+06	1.06512e+07	5.3043e+06	1.278e+06	5.58556e+06	1.45242e+06	1.18436e+06
P49189	4-trimethylaminobutyraldehyde dehydrogenase	ALDH9A1	ALDH9A1	1312174111	1114872560	6.52011e+08	908525754	6.40595e+08	6.05024e+08	6.66915e+08	8.05094e+08	1217171499	8.6771e+08	8.78251e+08	9.52584e+08	1409276193	1280470470	879203251	8.40783e+08	1171281471	2069093402	1502967877	6.33575e+08	7.09504e+08	5.89789e+08	5.79782e+08	6.15083e+08	6.58147e+08	812394935	7.91591e+08	1116005895	650482464	1057782850	1864751976	7.4764e+08	7.96696e+08	1780803211	1610699843	1038741732	7.18246e+08	6.99433e+08	7.69674e+08	1141592260	858334274	1135528528	905269404	1184184923	1037098152	1258355754
P09972	Fructose-bisphosphate aldolase C	ALDOC	ALDOA;ALDOC;ALDOB;HEL-S-87p	4.99433e+07	3.77011e+08	76196969	1.04129e+08	1.34096e+08	1.40377e+08	144173342	1.14606e+08	1.72896e+08	1.56285e+08	1.68854e+08	2.98513e+08	1.22634e+08	118220028	1.7719e+08	1.79649e+08	222738276	1.2824e+08	9.27085e+07	2.23171e+08	1.00873e+08	1.93746e+08	2.95329e+08	255935045	1.10786e+08	101169089	8.77877e+07	1.33445e+08	3.00686e+08	134039825	7.54755e+07	1.18712e+08	2.84875e+08	5.07506e+07	8.70473e+07	2.42932e+08	1.33047e+08	4.52282e+08	2.18697e+08	1.26297e+08	182829244	6.49605e+07	8.22044e+07	5.96488e+07	6.56323e+07	8.7215e+07
Q9BT22	Chitobiosyldiphosphodolichol beta-mannosyltransferase	ALG1	ALG1	0	9.4315e+06	1.49703e+07	1.15083e+07	6.02335e+06	1.01995e+07	1.13881e+07	5.13911e+06	2.28349e+06	7.47372e+06	2.49085e+06	1.81494e+06	4.6771e+06	3.90881e+06	4.20356e+06	3.40763e+06	9.84239e+06	8.42101e+06	7.89883e+06	1.3927e+07	1.51494e+07	1.53777e+07	5.96895e+06	1.92628e+07	6.10613e+06	1.27419e+07	1.65376e+07	0	5.60706e+06	5.65419e+06	1.00443e+06	9.43093e+06	4.75963e+06	3.31343e+06	8.63395e+06	7.68598e+06	2.85419e+06	2.69653e+06	7.24256e+06	3.92626e+06	6.83155e+06	3.61625e+06	4.96456e+06	0	8.65072e+06	4.82299e+06
Q2TAA5	GDP-Man:Man(3)GlcNAc(2)-PP-Dol alpha-1,2-mannosyltransferase	ALG11	ALG11	947768	0	1.66359e+06	2.88468e+06	3.59284e+06	3.722e+06	4.42517e+06	686885	930020	2.036e+06	3.46748e+06	1.24435e+06	3.48439e+06	1.98967e+06	3.74845e+06	2.89597e+06	731315	7.4202e+06	3.66402e+06	5.37518e+06	4.23339e+06	6.56772e+06	673813	804537	911991	2.514e+06	5.25216e+06	2.39866e+06	6.52611e+06	1.81979e+06	0	398051	3.15003e+06	1.38484e+07	1.54432e+06	0	3.44521e+06	2.56619e+06	7.70809e+06	2.00957e+06	761650	602882	2.89156e+06	461133	1.6912e+06	2.53128e+06
Q9BV10	Dol-P-Man:Man(7)GlcNAc(2)-PP-Dol alpha-1,6-mannosyltransferase	ALG12	ALG12	0	1.33156e+06	0	825634	0	0	978239	1.92757e+06	0	0	691093	0	0	0	1.05844e+06	1.13585e+06	0	944858	0	1.11082e+06	1.38597e+06	1.33192e+06	0	2.63035e+06	0	2.29298e+06	995837	837091	778840	0	0	0	1.36398e+06	0	643083	0	607848	0	0	1.02777e+06	971285	0	0	0	0	1.1801e+06
A0A087WX43	N-acetylglucosaminyldiphosphodolichol N-acetylglucosaminyltransferase	ALG13	ALG13	0	0	0	0	0	0	0	0	0	0	0	0	0	0	0	0	0	0	0	0	0	0	0	0	0	0	0	0	0	0	0	0	0	0	0	0	0	0	0	0	0	0	0	0	0	0
A0A096LP10	N-acetylglucosaminyldiphosphodolichol N-acetylglucosaminyltransferase (Fragment)	ALG13	ALG13	0	680325	470865	942763	1.28437e+06	0	1.16873e+06	468562	495535	1.30788e+06	449006	2.02349e+06	0	0	0	1.23315e+06	667897	2.14769e+06	0	647129	1.07986e+06	1.66404e+06	827355	1.30787e+06	306106	1.11359e+06	840853	0	879689	2.2448e+06	371518	1.32475e+06	4.29417e+06	0	0	0	0	2.44921e+06	1.08117e+06	0	388208	0	746243	0	0	0
Q96F25	UDP-N-acetylglucosamine transferase subunit ALG14 homolog	ALG14	ALG14	0	0	0	2.38275e+06	928931	1.83957e+06	0	0	0	0	0	0	0	0	0	0	1.1832e+06	3.2612e+06	0	0	0	0	0	0	1.48696e+06	1.30642e+06	0	0	0	0	0	0	0	0	0	0	0	0	0	0	0	0	0	0	0	0
A0A024R184	Alpha-1,3/1,6-mannosyltransferase ALG2	ALG2	ALG2	1.63337e+07	4.85062e+07	2.81695e+07	3.63398e+07	3.93167e+07	5.04024e+07	5.18219e+07	4.3947e+07	3.4749e+07	4.33803e+07	5.31804e+07	3.22025e+07	2.3062e+07	4.68762e+07	4.8712e+07	4.42646e+07	3.05384e+07	5.46205e+07	2.5363e+07	4.83437e+07	2.82055e+07	4.64997e+07	1.12577e+07	3.74942e+07	2.26613e+07	4.40535e+07	3.39837e+07	3.16955e+07	7.24217e+07	4.22056e+07	2.26287e+07	6.22527e+07	4.34152e+07	1.65751e+07	30366302	3.12106e+07	3.99789e+07	3.99384e+07	6.88699e+07	3.42775e+07	3.34629e+07	1.37311e+07	1.45914e+07	1.9741e+07	1.74484e+07	2.1348e+07
Q9Y673	Dolichyl-phosphate beta-glucosyltransferase	ALG5	ALG5	1.16552e+07	1.40951e+07	1.76143e+07	3.19209e+07	2.18996e+07	1.25407e+07	2.70906e+07	2.8696e+07	2.37538e+07	3.86836e+07	2.6547e+07	1.70093e+07	1.65503e+07	9.76781e+06	2.38311e+07	2.46269e+07	5.53632e+06	3.08332e+07	1.18406e+07	2.82292e+07	2.87785e+07	2.33041e+07	7.87655e+06	8.9547e+06	6.47281e+06	1.08156e+07	2.26223e+07	2.0587e+07	2.64655e+07	1.6139e+07	1.01823e+07	5.40379e+06	1.4762e+07	8.34218e+06	8.94873e+06	1.55874e+07	3.09493e+07	2.18449e+07	3.61746e+07	1.85342e+07	1.92368e+07	9.66607e+06	1.20105e+07	9.95069e+06	1.66551e+07	7.50915e+06
S4R350	Alpha-1,3-glucosyltransferase	ALG6	ALG6	2.71247e+06	5.11057e+06	894076	5.30162e+06	6.39936e+06	3.68667e+06	4.59943e+06	2.85529e+06	5.45058e+06	6.65353e+06	6.83423e+06	5.11777e+06	2.52668e+06	5.9414e+06	5.80534e+06	3.9726e+06	4.11702e+06	3.43464e+06	4.85803e+06	8.14876e+06	6.80882e+06	7.66209e+06	1.48115e+06	5.73599e+06	534339	5.17215e+06	4.61085e+06	5.80793e+06	4.11136e+06	4.41588e+06	3.22213e+06	6.67923e+06	8.4845e+06	3.17078e+06	2.37626e+06	1.90919e+06	4.86088e+06	1.02357e+07	1.42612e+07	4.01657e+06	5.77667e+06	3.41869e+06	0	2.48681e+06	3.00829e+06	3.64742e+06
D1MAM2	Tyrosine-protein kinase receptor	ALK	DCTN1/ALK;A20;SQSTM1-ALK;ALK;PPFIBP1-ALK;EML4/ALK;KIF5B-ALK;EML4-ALK;TFG/ALK;KIF5B-ALK_K17	0	3.19697e+06	3.56535e+06	6.2029e+06	6.1318e+06	0	8.11629e+06	4.10574e+06	6.66938e+06	5.82706e+06	7.66127e+06	3.27951e+06	5.5251e+06	4.72636e+06	4.55894e+06	3.68824e+06	6.82575e+06	4.38195e+06	4.93774e+06	8819483	6.55742e+06	9.33175e+06	4.3478e+06	8.84481e+06	4.9275e+06	3.98514e+06	0	7.27396e+06	7.78411e+06	9.37522e+06	5.22658e+06	7.88632e+06	5.42447e+06	0	5.23156e+06	4.91092e+06	7.07929e+06	6.1568e+06	8.77137e+06	6.38097e+06	6.65245e+06	4.84202e+06	2.00254e+06	3.79312e+06	8.03646e+06	3.32623e+06
Q6P6C2	RNA demethylase ALKBH5	ALKBH5	ALKBH5	847969	871245	1.32956e+07	8.09214e+06	1.60403e+07	1.61235e+07	2.21121e+07	2.30063e+07	5.53643e+06	8.79308e+06	6.03188e+06	3.63244e+06	0	6.40173e+06	6.0794e+06	6.99119e+06	3.51165e+06	5.05708e+06	3.33273e+06	8.4504e+06	5.90577e+06	6.32374e+06	7.30309e+06	425002	4.90108e+06	6.56729e+06	1.39662e+07	1.20928e+06	4.704e+06	1.15927e+06	0	882734	2.04061e+06	0	0	579603	1.56211e+06	1.12796e+06	1.54586e+06	1.05883e+06	0	0	2.13811e+06	0	977071	0
I3L1D5	Polyunsaturated fatty acid lipoxygenase ALOX15B	ALOX15B	ALOX15B	7.21036e+06	5.84468e+07	2.96913e+06	1.78573e+07	7.95776e+06	3.23004e+07	8.00007e+06	2.08932e+07	5.58222e+06	2.72361e+07	3.04433e+07	1.41951e+07	4.13626e+07	8.65379e+06	9.34196e+06	1.72416e+07	8.85544e+06	1.63518e+07	3.04666e+07	2.28213e+07	12397487	5.78827e+07	2.34434e+07	2.0139e+07	7.5972e+06	1.29558e+07	2.95887e+07	4.35566e+07	3.20627e+07	1.69012e+07	1.57725e+07	9.53894e+06	2.80441e+07	1.37721e+07	6.90683e+07	3.88186e+07	9.29339e+06	8.36106e+06	2.7263e+07	2.98563e+07	2.00942e+07	1.25152e+07	1.72822e+07	7.60049e+06	1.70646e+07	1.13771e+07
P09917	Polyunsaturated fatty acid 5-lipoxygenase	ALOX5	ALOX5	1.64921e+08	1.93491e+08	1.44002e+08	2.06147e+08	2.19652e+08	1.65755e+08	2.23957e+08	2.45703e+08	1.71418e+08	1.5021e+08	2.42934e+08	2.41213e+08	1.70982e+08	1.81874e+08	233331270	2.06636e+08	1.58564e+08	2.17443e+08	2.14782e+08	2.91317e+08	2.59452e+08	2.46927e+08	2.98467e+08	1.72522e+08	2.09382e+08	2.01765e+08	2.3304e+08	1.89859e+08	2.59363e+08	1.77757e+08	1.42446e+08	2.97854e+08	2.19639e+08	1.33289e+08	1.87631e+08	2.11471e+08	2.17212e+08	2.22961e+08	2.56942e+08	2.52521e+08	275723101	2.18729e+08	2.96881e+08	238394371	1.60072e+08	1.64339e+08
P20292	Arachidonate 5-lipoxygenase-activating protein	ALOX5AP	ALOX5AP	1.71949e+07	3.97254e+07	4.21897e+07	1.8329e+07	2.31435e+07	1.30201e+07	7.27753e+07	6.805e+07	4.58947e+07	1.88144e+07	3.7571e+07	0	5.09154e+07	2.53553e+07	7.71853e+07	1.50784e+07	5.60371e+07	7.74331e+06	1.51307e+07	73268800	9.65663e+07	2.11693e+07	2.92615e+07	2.07076e+07	2.40958e+07	6.0344e+07	6.66237e+07	6.32678e+07	3.28593e+07	5.55757e+07	3.0794e+07	6.33492e+07	6.18394e+07	3.91564e+07	3.24658e+07	6.11681e+07	7.14672e+07	9.28959e+07	8.06901e+07	7.67812e+07	7.67108e+07	4.71238e+07	3.92836e+07	3.83113e+07	3.22879e+07	3.16532e+07
P05186	Alkaline phosphatase, tissue-nonspecific isozyme	ALPL	ALPL	3.76701e+06	3.2675e+07	4.79139e+06	1.89871e+07	1.83254e+07	7.21473e+06	1.19267e+07	1.69657e+07	25586250	6.52804e+07	9.96474e+06	1.02526e+07	0	3.1708e+07	5.62455e+06	6.48702e+06	1.24442e+07	6.72919e+06	6.45186e+06	6233373	1.92127e+07	551545	1.19877e+07	4.5422e+06	2.74686e+06	2.68377e+07	1.35097e+07	1.3227e+07	1.01873e+07	6.05519e+06	2.99059e+06	9.82889e+06	1.21231e+06	0	3.40774e+07	1.72983e+06	2.40014e+06	5.0178e+07	9.61341e+06	0	8.96032e+06	3.17636e+06	3.65017e+06	0	2.65735e+06	0
E9PB61	THO complex subunit 4	ALYREF	ALYREF	3.31107e+07	6.80965e+07	2.89805e+07	4.87095e+07	4.47945e+07	4.27631e+07	6.05678e+07	3.22913e+07	5.62417e+07	9.55167e+07	6.50481e+07	7.02854e+07	4.1008e+07	4.54939e+07	5.62043e+07	6.99095e+07	4.61633e+07	6.85823e+07	5.13778e+07	6.02358e+07	5.12652e+07	5.56285e+07	3.54451e+07	6.13659e+07	2.59423e+07	3.36393e+07	2.68465e+07	6.61101e+07	2.2492e+08	7.27041e+07	4.64303e+07	7.96966e+07	7.35727e+07	3.05475e+07	6.51047e+07	4.87066e+07	6.46178e+07	5.88567e+07	1.63051e+08	7.14449e+07	5.37103e+07	3.19801e+07	2.61052e+07	2.52022e+07	4.83458e+07	2.58163e+07
P02760	Protein AMBP	AMBP	ITIL;AMBP	1.16852e+08	5.75717e+07	1.33651e+08	8.0701e+07	7.50903e+07	1.85382e+08	8.19376e+07	107771519	5.32506e+07	4.57141e+07	4.99267e+07	8.51886e+07	7.83904e+07	8.72433e+07	5.2246e+07	5.13726e+07	1.2333e+08	3.78144e+07	1.07058e+08	6.56055e+07	1.12103e+08	7.53652e+07	1.7514e+08	3.78926e+07	1.57717e+08	8.8642e+07	9.02753e+07	7.00073e+07	1.86015e+08	5.61899e+07	6.73884e+07	6.89423e+07	2.71936e+07	8.17511e+07	5.1543e+07	1.66397e+08	9.09282e+07	3.79851e+07	6.06708e+07	8.84874e+07	4.66501e+07	1.22779e+08	2.4301e+08	1.41404e+08	5.15633e+07	1.58472e+08
Q9Y303	N-acetylglucosamine-6-phosphate deacetylase	AMDHD2	AMDHD2	1.37831e+06	3.07819e+06	0	2.25962e+06	1.90215e+06	610912	3.86687e+06	4.11156e+06	3.67533e+06	6.39835e+06	2.82659e+06	3.58358e+06	1.32334e+06	4.98823e+06	2.78567e+06	2.34407e+06	1.53224e+06	1.27004e+06	4.72422e+06	4.57676e+06	2.47572e+06	3.47329e+06	1.59791e+06	3.20233e+06	0	3.73536e+06	4.67032e+06	4.79022e+06	2.3229e+06	0	1.74129e+06	4.65985e+06	7.86511e+06	389399	5.68822e+06	2.45706e+06	4.43635e+06	2.85193e+06	5.73877e+06	2.80986e+06	6.69673e+06	846569	1.74514e+06	1.30209e+06	847149	1.18905e+06
Q8IY63	Angiomotin-like protein 1	AMOTL1	AMOTL1	0	0	4.0881e+06	3.48918e+06	2.44131e+06	3.17107e+06	3.90179e+06	3.81488e+06	0	0	0	2.22921e+06	2.9153e+06	0	0	0	0	0	3.21046e+06	8316534	0	0	0	6.7858e+06	0	0	0	0	3.14331e+06	0	0	4.71605e+06	0	2.8012e+06	0	6.64854e+06	1.92489e+06	0	0	2.94854e+06	0	4.08622e+06	0	0	0	2.59381e+06
Q01432	AMP deaminase 3	AMPD3	AMPD3	472107	674686	306543	2.23891e+06	1.81933e+06	621520	3.69384e+06	3.00316e+06	2.87013e+06	2.18338e+06	9.85432e+06	1.31107e+06	1.04348e+06	1.7686e+06	2.59827e+06	3.45377e+06	0	1.45137e+06	0	3.27524e+06	2.46662e+06	3.90476e+06	3.44277e+06	992832	476000	2.20599e+06	1.60474e+06	928526	4.79588e+06	2.69796e+06	0	3.8934e+06	4.17934e+06	465397	3.43584e+06	0	1.95935e+06	7.35257e+06	1.00411e+07	2.26107e+06	1.07341e+07	0	4.97411e+06	2.09755e+06	2.09084e+06	951105
B7ZMD7	Alpha-amylase	AMY1A	hCG_1992932;AMY1A;AMY2A;AMY2B	1.27483e+06	7.80957e+06	4.84805e+06	3.90412e+06	8.92137e+06	0	2.45398e+06	3.55853e+06	2.59545e+06	3.2627e+06	6.96147e+06	373126	1.29671e+06	0	5.47716e+07	1.02062e+06	3.77978e+06	4.23939e+06	6.98672e+06	764283	708427	0	1.57047e+06	7.4256e+06	3.10152e+06	2.56613e+06	2.59517e+06	1.7867e+06	1.26465e+06	2.7127e+06	4.31797e+06	0	2.09305e+06	0	4.56341e+06	3.09142e+06	1.87032e+06	1.15592e+06	3.92397e+06	0	4.89132e+06	1.18365e+06	1.82482e+06	996617	6.31397e+06	5.69706e+06
Q9BS18	Anaphase-promoting complex subunit 13	ANAPC13	ANAPC13	0	0	0	0	0	2.32247e+06	0	0	0	0	0	0	0	0	0	0	0	0	0	1.36419e+06	0	0	0	0	0	0	0	0	0	0	0	0	0	0	0	0	0	0	0	0	0	0	0	0	0	0
Q9UJX5	Anaphase-promoting complex subunit 4	ANAPC4	ANAPC4	0	0	0	937433	1.03146e+06	741078	484154	0	0	863117	857855	954079	1.75333e+06	708591	1.48561e+06	985653	1.07303e+06	1.25204e+06	1.46733e+06	0	3.03583e+06	2.25273e+06	2.0909e+06	1.30094e+06	1.34443e+06	1.87864e+06	3.26719e+06	971794	895633	649266	0	1.02577e+06	944464	0	0	730299	0	1.40234e+06	2.68644e+06	0	1.49186e+06	0	9.87682e+06	957500	0	917816
Q9UJX4	Anaphase-promoting complex subunit 5	ANAPC5	ANAPC5	0	0	0	0	0	0	0	1.53102e+06	2.20614e+06	2.17085e+06	0	0	0	0	4.33791e+06	0	0	0	0	0	1.58534e+06	2.57263e+06	0	0	0	2.26424e+06	0	0	1.0323e+06	0	2.54014e+06	4.85154e+06	0	2.36756e+06	0	0	0	1.83625e+06	0	0	0	0	2.85315e+06	0	0	2.06528e+06
A8KAQ7	ANAPC7 protein	ANAPC7	ANAPC7	4.5919e+06	7.81521e+06	1.4708e+07	1.53743e+07	1.34495e+07	1.29328e+07	2.30441e+07	1.25156e+07	1.09699e+07	2.05284e+07	1.08586e+07	1.35333e+07	8.77291e+06	1.28485e+07	9.88866e+06	1.11114e+07	8.59225e+06	1.52712e+07	7.7852e+06	21551766	2.30666e+07	2.37503e+07	3.02921e+07	1.62756e+07	1.38522e+07	3.18753e+07	2.72909e+07	8.86335e+06	1.12278e+07	1.26629e+07	1.21874e+07	1.73761e+07	2.17873e+07	3.95751e+06	1.19902e+07	3.40046e+06	1.32803e+07	1.94556e+07	8.85757e+06	8.93611e+06	1.59904e+07	9.53124e+06	5.5845e+06	1.59531e+07	1.62715e+07	3.93914e+06
Q9BY76	Angiopoietin-related protein 4	ANGPTL4	ANGPTL4	0	0	0	2.59465e+06	3.19771e+06	1.43531e+06	7.21103e+06	4.33322e+06	2.82427e+06	2.8862e+06	3.76665e+06	2.62945e+06	1.80761e+06	1.97351e+06	3.96764e+06	4.30605e+06	1.64719e+06	0	932179	4.48523e+06	4.98013e+06	5.18747e+06	1.14134e+07	0	1.97442e+06	2.43494e+06	2.58341e+06	1.8792e+06	3.05727e+06	3.11078e+06	689438	1.73316e+06	2.11866e+06	0	0	0	2.52765e+06	2.48416e+06	7.83345e+06	0	1.92874e+06	0	1.65498e+06	0	0	0
P16157	Ankyrin-1	ANK1	hANK1;ANK1;ANK2;ANK3	5.69104e+08	3.12378e+08	4.58448e+08	2.31769e+08	1.74194e+08	3.81164e+08	2.26128e+08	4.40184e+08	6.66006e+08	1.08413e+08	1.1223e+08	4.11556e+08	1.20272e+08	4.41022e+08	388241544	1.25943e+08	7.43269e+08	7.93274e+08	8.98076e+08	1.89101e+08	2.34446e+08	1.19542e+08	1.69244e+08	1.34472e+08	494249967	2.66006e+08	2.00664e+08	1.46185e+08	177300512	1.44331e+08	1499679896	1.80604e+08	2.31728e+08	3.17156e+08	2.70678e+08	1.39011e+08	1.4422e+08	1.38424e+08	2.00754e+08	1.32312e+08	1.25965e+08	2.6092e+08	1.17216e+08	2.30001e+08	1.90206e+08	1.82935e+08
A0A5F9ZI73	Ankyrin-2	ANK2	AFG3L2;DKFZp686M09125;ANK2;ANK3;ANK1	5.72729e+06	1.00213e+07	1.28443e+07	1.21896e+07	1.46709e+07	7.69351e+06	1.3207e+07	1.01497e+07	8.25568e+06	1.10143e+07	7.03116e+06	1.22845e+07	1.11694e+07	1.1625e+07	4.73138e+06	7.08819e+06	4.00783e+06	1.65411e+07	1.16057e+07	1.30851e+07	1.60713e+07	7.64012e+06	4.26766e+06	9.20586e+06	22977187	2.36521e+07	2.11062e+07	1.5058e+06	1.06871e+07	8.00139e+06	1.40592e+06	6.05893e+06	1.36686e+07	0	5.63079e+06	4.59456e+06	7.88762e+06	1.35598e+06	2.16513e+06	5.80194e+06	1.65976e+07	6.33719e+06	1.45248e+06	3.68892e+06	1.19722e+07	3.9052e+06
Q12955	Ankyrin-3	ANK3	ANK1;ANK2;ANK3;DKFZp686M09125	1.49771e+07	3.05027e+07	4.20641e+07	6.60078e+07	4.22054e+07	4.29061e+07	3.63705e+07	4.13727e+07	4.48463e+07	2.17764e+07	2.66437e+07	2.65464e+07	1.53202e+07	4.49343e+07	2.3664e+07	1.65571e+07	5.09001e+07	4.0292e+07	2.63851e+07	3.7948e+07	3.4749e+07	1.8168e+07	2.95736e+07	3.24518e+07	2.98962e+07	4.85969e+07	5.35445e+07	3.13494e+07	3.49934e+07	1.72557e+07	1.42725e+07	3.50428e+07	2.2817e+07	1.15535e+07	1.96095e+07	2.54843e+07	1.36128e+07	3.79786e+07	3.24411e+07	1.71425e+07	3.28673e+07	5.48789e+07	1.04802e+07	2.76465e+07	2.60555e+07	2.66776e+07
Q9P2R3	Rabankyrin-5	ANKFY1	ANKFY1;DKFZp686M19106	1.1131e+08	2.43968e+08	2.37892e+08	2.11152e+08	1.86781e+08	1.66863e+08	2.80839e+08	1.82516e+08	1.66322e+08	2.42593e+08	1.9821e+08	155299512	2.55969e+08	2.16373e+08	2.14183e+08	1.80527e+08	1.24201e+08	2.34517e+08	1.83127e+08	2.03e+08	2.06106e+08	2.15734e+08	1.76236e+08	1.37754e+08	1.6377e+08	2.37255e+08	2.36777e+08	198240859	2.25468e+08	1.90401e+08	1.44492e+08	2.08376e+08	2.51275e+08	125340004	2.60032e+08	1.85742e+08	1.88653e+08	2.35811e+08	2.59365e+08	1.72994e+08	2.02388e+08	1.43555e+08	9.7285e+07	1.65348e+08	1.12213e+08	1.3426e+08
E9PDP5	Ankyrin repeat and KH domain-containing protein 1 (Fragment)	ANKHD1	FLJ00246;ANKRD17;ANKHD1	0	0	0	0	0	0	0	0	0	606835	0	0	0	0	0	0	0	0	0	0	0	0	0	0	0	0	0	0	0	0	0	0	643693	0	0	0	0	0	0	0	0	0	0	0	0	0
A0A024R9Z6	Ankyrin repeat and MYND domain containing 2, isoform CRA_b	ANKMY2	ANKMY2	0	388658	0	0	0	0	0	0	0	0	532156	0	0	0	0	0	0	0	0	0	0	0	0	0	0	0	0	0	791066	0	0	896083	562331	0	0	0	0	0	0	0	0	0	693859	0	0	0
O75179	Ankyrin repeat domain-containing protein 17	ANKRD17	FLJ00246;ANKRD17;ANKHD1	0	0	0	0	0	0	0	0	0	0	0	0	0	0	0	0	2.07827e+06	0	0	886225	0	0	722102	0	0	0	0	0	512635	1.1578e+06	0	0	0	0	0	0	0	583813	0	1.00663e+06	0	0	0	0	0	0
Q5VYY1	Ankyrin repeat domain-containing protein 22	ANKRD22	ANKRD22	7.31765e+06	2.74736e+07	5.1696e+06	1.45996e+07	1.38254e+07	5.77825e+06	2.03263e+07	9.00885e+06	1.90325e+07	1.8757e+07	3.13143e+07	2.19759e+07	1.29906e+07	1.89498e+07	2.87562e+07	2.83872e+07	1.50335e+07	1.12865e+07	9.36807e+06	2.05465e+07	1.11915e+07	2.37705e+07	2.95539e+07	1.33802e+07	7.1208e+06	1.10024e+07	8.33646e+06	3.36669e+07	3.17082e+07	2.83167e+07	1.3748e+07	3.87072e+07	4.78464e+07	1.16083e+07	1.48862e+07	2.38909e+07	4.06919e+07	5.51487e+07	1.16382e+08	2.53176e+07	2.19647e+07	1.0731e+07	1.99018e+07	7.04277e+06	1.16115e+07	1.02263e+07
A0A024R2I9	Ankyrin repeat domain 28, isoform CRA_c	ANKRD28	ANKRD44;LOC91526;ANKRD28	0	0	0	0	0	0	2.36078e+06	1.60247e+06	0	0	0	0	0	0	1.94729e+06	2.32275e+06	0	0	0	0	0	929406	1.29749e+06	0	0	0	1.31153e+06	0	1.01463e+06	0	0	0	0	0	0	0	0	0	0	0	0	0	0	0	0	0
Q8N8A2	Serine/threonine-protein phosphatase 6 regulatory ankyrin repeat subunit B	ANKRD44	ANKRD44;LOC91526;ANKRD28	8.09089e+07	1.53029e+07	1.70082e+07	3.67657e+07	2.50121e+07	2.56887e+07	4.37929e+07	2.03453e+07	4.06026e+07	2.05895e+07	1.92592e+07	2.89206e+07	4.99404e+07	2.24956e+07	2.53976e+07	3.37844e+07	2.80069e+07	1.88193e+07	3.45592e+07	18034049	3.02252e+07	2.68431e+07	2.24763e+07	2.13999e+07	2.89742e+07	3.84716e+07	3.79285e+07	3.68453e+07	1.93045e+07	3.32943e+07	4.33046e+07	3.11505e+07	3.3615e+07	5.17441e+07	6.52423e+07	2.5897e+07	2.69436e+07	1.98134e+07	2.4496e+07	3.43411e+07	4.71599e+07	4.08687e+07	1.76887e+07	2.96184e+07	6.47084e+07	3.44123e+07
Q8TB46	ANKRD50 protein	ANKRD50	ANKRD50	0	1.6869e+06	0	0	2.23054e+06	0	3.15353e+06	0	2.00858e+06	4.64349e+06	3.79378e+06	0	0	0	3.70026e+06	0	0	2.71991e+06	2.76719e+06	0	0	2.7015e+06	1.58378e+06	0	0	1.17235e+06	1.68467e+06	0	0	0	0	2.67275e+06	2.03926e+06	0	0	1.23714e+06	2.2844e+06	1.8559e+06	2.38653e+06	2.38901e+06	0	0	0	0	0	1.25671e+06
A0A3B3ISP1	Ankyrin repeat and SAM domain-containing protein 1A	ANKS1A	ANKS1A	3.95645e+07	2.6518e+07	6.61996e+06	1.03011e+07	9.81467e+06	3.55038e+06	7.64667e+06	3.15307e+06	1.77459e+07	2.87448e+07	2.0682e+07	2.44074e+07	9.00222e+06	1.11085e+07	1.30328e+07	1.70582e+07	2.54148e+07	7.05912e+06	2.13491e+07	1.39257e+07	7.55423e+06	6.84782e+06	1.10806e+07	2.82185e+07	3.90484e+06	1.09182e+07	1.50895e+07	3.66438e+07	3.45388e+07	2.30642e+07	3.20619e+07	2.39001e+07	2.27375e+07	3.22938e+07	2.41429e+07	2.50672e+07	2.33507e+07	3.12448e+07	4.64224e+07	2.81997e+07	1.94971e+07	4.97833e+07	1.42726e+07	1.61784e+07	1.43625e+07	8.59293e+07
Q9NW15	Anoctamin-10	ANO10	ANO10	0	0	1.74735e+06	2.43693e+06	2.53697e+06	2.50894e+06	2.58044e+06	0	1.11409e+06	0	741182	529037	0	2.17771e+06	1.45971e+06	0	650095	999303	0	2846537	3.02137e+06	3.55027e+06	0	1.61447e+06	0	1.68642e+06	3.34792e+06	1.19949e+06	0	1.89674e+06	0	2.39397e+06	1.82424e+06	0	0	0	1.67692e+06	1.87258e+06	1.06022e+06	0	0	0	0	0	0	724395
Q4KMQ2	Anoctamin-6	ANO6	ANO6	4.74525e+07	2.85255e+07	4.0627e+07	3.89057e+07	3.19559e+07	4.16368e+07	3.67619e+07	4.79751e+07	2.95228e+07	4.15611e+07	4.24355e+07	3.99152e+07	4.22352e+07	4.73896e+07	6.56329e+07	3.98765e+07	3.17683e+07	2.24207e+07	4.01835e+07	3.61428e+07	5.65966e+07	4.54029e+07	4.21867e+07	3.90037e+07	5.24627e+07	5.18638e+07	7.02363e+07	4.51699e+07	3.01979e+07	4.33847e+07	6.03545e+07	4.74447e+07	3.47435e+07	6.97776e+07	2.97626e+07	5.7445e+07	5.52624e+07	6.46161e+07	3.85356e+07	4.33015e+07	6.03212e+07	6.23832e+07	6.05687e+07	5.94141e+07	5.77599e+07	5.21457e+07
Q9BTT0	Acidic leucine-rich nuclear phosphoprotein 32 family member E	ANP32E	ANP32E	1.09954e+08	5.96816e+07	1.05197e+07	2.65445e+07	4.65259e+07	2.12154e+07	3.945e+07	8.11121e+07	7.10667e+07	2.8513e+08	4.47477e+07	6.36533e+07	5.65296e+07	5.07199e+07	6.16621e+07	8.43503e+07	7.04808e+07	1.43797e+08	1.0081e+08	5.55919e+07	3.37546e+07	3.78867e+07	6.23385e+07	2.08189e+07	1.42492e+07	1.49672e+07	8.76673e+06	8.84203e+07	1.17175e+08	5.84901e+07	1.36167e+08	4.24005e+07	4.00806e+07	121236533	9.93315e+07	4.67589e+07	2.84858e+07	2.94683e+07	4.83338e+07	5.73079e+07	3.70375e+07	8.15176e+07	5.38426e+07	5.16199e+07	7.5352e+07	7.59009e+07
Q9H6X2	Anthrax toxin receptor 1	ANTXR1	ANTXR1;ANTXR1/NNG1;ANTXR2	2.89298e+06	1.32171e+07	3.72344e+06	1.03984e+07	8.1525e+06	8.58253e+06	1.53251e+06	3.02964e+06	1.4589e+07	9.7974e+06	1.48152e+07	1.98083e+07	2.62479e+06	4.89414e+06	7.708e+06	1.08122e+07	1.03754e+07	9.4263e+06	9.69168e+06	1.67056e+07	1.26066e+07	1.33377e+07	9.61859e+06	1.71717e+07	1.34383e+06	8.57489e+06	1.02509e+07	5.65805e+06	2.21482e+07	7.96365e+06	6.12856e+06	1.16836e+07	2.02127e+07	3.72172e+06	2.47334e+06	1.06478e+07	1.38978e+07	1.11862e+07	3.03308e+07	1.17833e+07	8.24269e+06	3.45249e+06	4.43585e+06	3.0006e+06	2.39419e+06	0
P04083	Annexin A1	ANXA1	ANXA1	7.98094e+08	1408651355	1137981177	1049449729	1084243222	1399025879	1119601318	9.37541e+08	2265861400	1270408417	1187071107	9.7873e+08	1291833979	1478920961	1209052158	1624219077	8.91108e+08	1057692581	1195094235	1041785522	1070589890	9.01696e+08	1641325707	999450326	1315600332	1032443294	1232589027	1316192404	653975104	1739431143	1008447738	3218345144	2197735955	1152762611	1545071959	1189099939	3402483894	2347153509	1512177093	1772450946	1401002661	1313441656	8.04889e+08	1200461103	1021944959	1051655157
Q9UJ72	Annexin A10	ANXA10	ANXA10	8.51781e+06	12813612	4.77311e+06	2.79175e+06	1.7067e+07	1.15612e+06	3.31865e+06	4.00823e+06	1.9982e+07	1.13241e+07	4.14626e+06	1.46429e+07	5.99165e+06	1.59752e+07	1.48551e+07	1.33983e+07	1.44893e+07	1.69552e+07	1.48092e+07	7.78411e+06	1.73802e+07	8.30843e+06	1.89565e+07	1.04238e+07	1.36109e+07	1.28613e+07	5.12765e+06	1.57392e+07	1.8778e+07	1.26058e+07	5.35234e+06	7.43596e+06	2.26713e+07	1.32222e+07	1.03359e+07	1.37378e+07	9.67183e+06	1.6663e+07	2.89594e+07	7.60441e+06	2.28109e+07	1.2001e+07	2.14734e+07	5.10514e+06	1.76386e+07	1.31501e+07
P50995	Annexin A11	ANXA11	ANXA11;ANXA13	3.98021e+06	8.32006e+06	8.58162e+06	1.06061e+07	1.35411e+07	4.2693e+06	2.55094e+07	4.83821e+06	0	0	773207	0	1.98023e+06	8.37533e+06	1.65436e+07	6.94576e+06	0	3.70333e+06	8.192e+06	8582807	2.55853e+07	913634	0	0	0	1.70724e+06	1.31416e+06	5.33457e+06	0	0	2.53307e+06	8.68063e+06	727355	0	9.45568e+06	2.38207e+06	0	0	5.7435e+06	640923	0	0	4.24505e+06	4.27004e+06	3.54506e+06	0
P07355	Annexin A2	ANXA2	ANXA2P2;HEL-S-270;ANXA2	4420554371	5282805192	6186172472	4281817839	3447044841	4680983372	3907528715	2400510814	3406140491	4569738913	4655590405	3516481979	3751526389	4067626718	4149143027	4591371990	4475920218	3935976025	7362539905	2891496366	4589432241	3372189745	3412788820	8613434781	7209201711	4537627070	6616521583	3688532623	1829985543	5465057710	3886272443	7660751805	6035659320	4972552357	3937340921	4278557938	7353522063	9412418255	3895160034	4259156071	4264260797	6241782136	3299824973	7781836322	4446347185	4863228275
P12429	Annexin A3	ANXA3	ANXA3	6.27051e+08	2.54222e+08	6.30697e+08	5.36566e+08	3.72377e+08	4.8699e+08	2.49211e+08	1.98487e+08	3.75085e+08	2.0682e+08	1.33368e+08	2.07079e+08	2.75022e+08	3.54599e+08	3.18874e+08	5.19223e+08	3.72783e+08	3.73092e+08	6.88892e+08	2.93019e+08	3.51903e+08	1.34632e+08	8.13415e+08	2.74641e+08	9.94318e+08	4.85417e+08	7.19645e+08	3.89392e+08	1.80601e+08	4.26917e+08	4.3649e+08	3.64558e+08	3.49754e+08	6.27223e+08	3.94265e+08	2.39974e+08	2.27789e+08	2.86571e+08	3.02378e+08	195366257	4.72253e+08	8.79492e+08	3.81058e+08	1041913143	6.29412e+08	3.49732e+08
P09525	Annexin A4	ANXA4	DKFZp686H02120;ANXA5;ANXA4;HEL-S-274;SKP1	4.11762e+07	6.46969e+07	3.03421e+07	5.2696e+07	5.27948e+07	3.8054e+07	5.52171e+07	5.47881e+07	9.06674e+07	6.46183e+07	9.56373e+07	4.10411e+07	3.07217e+07	1.18429e+08	3.00845e+07	4.15197e+07	2.75677e+07	9.24621e+07	5.19561e+07	5.06192e+07	7.76337e+07	4.04599e+07	4.6318e+07	4.24507e+07	4.61587e+07	5.45832e+07	6.9262e+07	5.1639e+07	1.95977e+07	4.61733e+07	4.77298e+07	6.77715e+07	4.8344e+07	3.45159e+07	5.21097e+07	3.52208e+07	4.23892e+07	4.68233e+07	9.71972e+07	2.8924e+07	1.72341e+08	4.27244e+07	2.3482e+07	5.94836e+07	3.89846e+07	3.62909e+07
P08758	Annexin A5	ANXA5	ANXA5;ANXA4;HEL-S-274;SKP1	1582906034	2837058379	9.97361e+08	1360244473	1419679231	9.18309e+08	8.78054e+08	8.49245e+08	1638907357	1982524255	1759700382	2014031439	1770304575	1636086678	1722909142	1525730491	1467124417	1496464164	1439390538	1889283256	1395669366	1453054913	1857763105	2402266529	1246301810	1392773473	1242629987	2129710213	1224060135	2057913963	1481187897	2067006400	2319211901	1516514117	1764771731	2083349478	2222006692	2298044348	2163655142	1947803545	2473852388	1782244374	1219911037	1397881339	1755562098	1513873562
A0A0S2Z2Z6	Annexin (Fragment)	ANXA6	ANXA6	2.60151e+07	5.77866e+06	1.35849e+06	9.46846e+06	2.53838e+06	3.89497e+06	1.20326e+07	1.69209e+07	1.5622e+07	7.84201e+06	8.11002e+06	1.21757e+07	1.47705e+07	8.40297e+06	1.96569e+07	1.60485e+07	951471	4.10722e+06	1.68906e+07	8.68143e+06	5.24559e+06	1.70644e+07	2.81186e+06	4.48116e+06	1.34174e+07	2.20654e+07	1.4138e+07	1.62518e+07	1.12609e+07	1.71022e+07	5.61222e+06	6.17166e+06	1.45363e+07	3.20601e+06	1.75847e+07	1.16711e+07	1.69499e+07	1.24856e+07	2.00868e+07	1.42629e+07	1.3247e+07	1.85544e+07	1.0455e+07	6.30236e+06	2.28215e+07	5.84723e+06
A0A0S2Z377	Annexin (Fragment)	ANXA6	ANXA6	7.34314e+06	1.50424e+07	3.43706e+06	5.6636e+06	1.49686e+06	3.39243e+06	8.66982e+06	0	8.22087e+06	7.95956e+06	5.16005e+06	6.78389e+06	1.53853e+07	6.05795e+06	7.79252e+06	7.52677e+06	4.45251e+06	1.53686e+06	4.28143e+06	17698531	4.86909e+07	4.25474e+07	8.77553e+06	9.95777e+06	4.82252e+07	9.20679e+06	4.25958e+07	1.18023e+07	6.444e+06	1.10891e+07	8.64616e+06	9.35743e+06	1.44897e+07	2.32428e+06	1.39481e+07	1.18715e+07	7.01557e+06	7.20638e+06	2.57043e+07	1.05431e+07	1.43738e+07	0	1.03688e+07	4.43404e+07	8.82949e+07	9.01261e+06
Q5VT79	Annexin A8-like protein 1	ANXA8L1	ANXA8;ANXA8L1	3.88266e+07	8.74987e+07	5.55708e+07	7.32383e+07	5.67593e+07	6.83531e+07	6.90361e+07	6.25955e+07	4.56743e+07	109459959	6.3251e+07	1.15165e+08	5.57663e+07	5.2519e+07	9.39951e+07	1.13837e+08	4.83552e+07	1.03427e+08	7.98272e+07	1.11877e+08	9.41372e+07	9.08912e+07	1.21113e+08	7.58496e+07	7.90361e+07	5.46229e+07	8.64919e+07	8.46563e+07	107818334	6.91148e+07	3.16172e+07	1.0729e+08	8.72105e+07	3.05718e+07	5.66985e+07	7.91397e+07	8.88652e+07	9.30627e+07	1.15057e+08	1.16935e+08	6.48666e+07	5.22179e+07	4.36558e+07	4.90603e+07	6.0297e+07	2.75463e+07
O76027	Annexin A9	ANXA9	ANXA9	934101	1.0168e+07	0	5.63939e+06	2.29967e+06	0	0	2.01048e+06	809322	1.05539e+06	3.30802e+06	0	9.24441e+06	2.7302e+06	0	0	1.61081e+06	2.35663e+07	580602	1.42137e+06	0	0	0	2.04851e+06	0	1.48582e+06	2.06808e+06	925450	3.17697e+06	1.68447e+06	1.18738e+07	1.38956e+07	1.01253e+07	888723	2.79726e+06	8.64203e+06	2.27551e+06	9.06459e+06	1.42318e+06	3.97902e+06	5.01487e+06	1.44237e+06	2.17282e+06	0	0	4.09369e+06
Q16853	Membrane primary amine oxidase	AOC3	AOC3;AOC2	4.92596e+08	2.87404e+08	1251512618	1092846384	1293861369	9.43317e+08	7.74903e+08	8.71983e+08	6.91147e+08	4.64864e+08	4.86418e+08	4.20893e+08	7.17497e+08	9.4828e+08	5.67174e+08	5.49072e+08	6.68614e+08	6.58048e+08	9.122e+08	4.92644e+08	1077473514	5.53512e+08	3.52139e+08	3.36747e+08	9.84595e+08	1720596382	1725819950	4.62652e+08	3.34988e+08	5.08871e+08	609577463	3.50526e+08	4.21194e+08	2.91749e+08	7.63074e+08	2.54287e+08	3.67844e+08	3.51226e+08	3.25955e+08	5.25222e+08	6.15916e+08	7.55832e+08	3.4978e+08	1018372366	5.64842e+08	5.43434e+08
Q06278	Aldehyde oxidase	AOX1	AOX1	2.31941e+06	2.28465e+06	0	0	2.42742e+06	0	1.41267e+06	663044	0	0	0	0	0	0	0	0	0	0	0	0	0	0	0	3.77849e+06	2.49926e+06	0	0	0	4.98954e+06	2.56812e+06	0	3.7877e+06	2.35807e+06	0	1.81024e+06	1.94223e+06	3.26079e+06	0	4.58849e+06	2.65892e+06	2.01338e+06	0	0	0	0	0
Q10567	AP-1 complex subunit beta-1	AP1B1	DKFZp781K0743;AP1B1;AP2B1;DKFZp686A01208	6.31774e+07	3.71297e+07	7.83743e+07	5.09098e+07	6.47559e+07	9.24829e+07	7.19235e+07	7.38476e+07	5.80279e+07	5.13712e+07	5.10021e+07	67134523	4.43925e+07	3.56197e+07	6.79139e+07	4.54574e+07	6.73387e+07	3.59336e+07	8.55871e+07	5.32852e+07	6.15102e+07	6.31385e+07	8.08907e+07	3.30293e+07	7.15466e+07	8.49595e+07	6.2358e+07	5.80499e+07	3.65231e+07	4.35013e+07	6.09522e+07	6.35662e+07	5.87488e+07	6.84818e+07	5.41598e+07	5.02285e+07	3.6366e+07	2.47635e+07	2.53172e+07	3.46274e+07	4.8658e+07	5.61058e+07	5.96278e+07	7.9123e+07	7.8754e+07	4.71319e+07
O75843	AP-1 complex subunit gamma-like 2	AP1G2	AP1G1;AP1G2	3.59733e+06	1.45987e+06	1.81187e+06	1.89929e+06	4.34084e+06	4.55956e+06	2.949e+06	4.248e+06	0	2.10612e+06	3.83517e+06	0	0	2.1176e+06	6.82545e+06	5.59388e+06	1.17946e+06	6.18774e+06	0	7.71081e+06	3.09297e+06	3.97347e+06	3.08215e+06	762164	0	3.12828e+06	837245	740596	6.25043e+06	1.02085e+06	3.82652e+06	6.38571e+06	1.51014e+06	0	0	0	0	2.3933e+06	3.54871e+06	4.02842e+06	0	1.41142e+06	892626	1.72388e+06	3.44283e+06	0
A0A024R7K8	Adaptor-related protein complex 1, mu 1 subunit, isoform CRA_a	AP1M1	AP1M2;AP1M1	3.14038e+07	6.06268e+07	4.95204e+07	6.93778e+07	5.91228e+07	5.3299e+07	5.23204e+07	4.8824e+07	6.70169e+07	7.14141e+07	6.97653e+07	2.80061e+07	2.95809e+07	6.05198e+07	5.09856e+07	4.43728e+07	3.0026e+07	6.84057e+07	5.39293e+07	5.15223e+07	5.12312e+07	4.66457e+07	7.15167e+06	2.34408e+07	4.0095e+07	7.66225e+07	6.72142e+07	4.73572e+07	1.43356e+08	4.09084e+07	4.8145e+07	4.07651e+07	1.07165e+08	1.81631e+07	2.50371e+07	2.95475e+07	8.25524e+07	2.18031e+07	4.23504e+07	4.62684e+07	3.4754e+07	3.14818e+07	1.46712e+07	3.977e+07	2.39134e+07	2.19761e+07
Q9Y6Q5	AP-1 complex subunit mu-2	AP1M2	AP1M2;AP1M1	1.44408e+07	6.59741e+07	3.28378e+07	6.87086e+07	5.16076e+07	3.89037e+07	6.55615e+07	7.9618e+07	7.15154e+07	8.07396e+07	9.9043e+07	8.33688e+07	7.92615e+07	7.5705e+07	8.72863e+07	8.25765e+07	7.75985e+07	1.09983e+08	6.40051e+07	5.62856e+07	7.63282e+07	6.52533e+07	4.72901e+07	1.18338e+08	3.42195e+07	3.86898e+07	5.97765e+07	135581080	6.44544e+07	7.56052e+07	6.35461e+07	1.14856e+08	1.06632e+08	2.51587e+07	5.11653e+07	1.01036e+08	188722514	9.05641e+07	1.32959e+08	1.25062e+08	146379801	1.82918e+07	4.55563e+07	3.41351e+07	2.06231e+07	6.13505e+07
A0A2R8YGH5	AP complex subunit sigma	AP1S1	DKFZp779P0659;AP1S1;AP1S2;AP1S3	1.76765e+06	8.08337e+06	3.11392e+06	6.94116e+06	9.55613e+06	3.47866e+06	6.7769e+06	6.69428e+06	5.26387e+06	3.34863e+06	3.77844e+06	3.22293e+06	2.33734e+06	4.58357e+06	5.26737e+06	4.66808e+06	7.21091e+06	1.07383e+07	0	4.26891e+06	1.69502e+06	3.87555e+06	1.16413e+06	4.34803e+06	1.44659e+06	4.24158e+06	4.8569e+06	1.00839e+07	7.55005e+06	3.61677e+06	3.46034e+06	3.73245e+06	1.04236e+07	768683	2.64086e+06	3.78614e+06	4.33357e+06	8.5218e+06	4.1215e+06	4.2741e+06	0	0	0	0	0	0
A0A024RBX8	Adaptor-related protein complex 1, sigma 2 subunit, isoform CRA_d	AP1S2	DKFZp779P0659;AP1S1;AP1S2;AP1S3	0	972840	0	2.04701e+06	2.9536e+06	0	3.98823e+06	0	1.16109e+06	0	2.59829e+06	0	0	2.32345e+06	0	2.46679e+06	0	0	0	0	0	0	0	0	0	0	2.21303e+06	0	0	0	0	0	0	0	0	0	2.93853e+06	1.56844e+06	0	0	1.07902e+06	0	0	0	0	0
B8ZZZ1	AP complex subunit sigma	AP1S3	DKFZp779P0659;AP1S1;AP1S2;AP1S3	1.06101e+06	1.19667e+06	2.1857e+06	3.36129e+06	2.44169e+06	1.32652e+06	0	0	0	0	1.18601e+06	0	2.5272e+06	2.11675e+06	748947	0	0	0	0	759273	1.65098e+06	1.41914e+06	0	0	0	0	1.98964e+06	734888	0	0	0	0	2.17915e+06	0	807447	664100	0	0	0	988658	0	0	0	0	773950	2.66982e+06
O95782	AP-2 complex subunit alpha-1	AP2A1	AP2A1;AP2A2	2.52391e+08	1.63048e+08	1.59774e+08	1.40985e+08	1.86835e+08	1.39616e+08	1.59655e+08	1.1052e+08	1.17263e+08	1.87957e+08	1.7649e+08	1.47598e+08	115656096	1.97272e+08	1.52045e+08	1.46079e+08	9.95735e+07	1.24372e+08	1.09891e+08	2.22092e+08	1.76506e+08	2.21296e+08	1.06552e+08	1.25018e+08	1.79816e+08	1.70363e+08	1.68798e+08	1.45494e+08	1.44846e+08	125110407	1.14503e+08	1.59885e+08	2.0525e+08	5.24695e+07	7.57952e+07	118119952	1.44608e+08	1.51658e+08	1.10933e+08	1.39359e+08	1.46358e+08	1.78745e+08	1.08988e+08	1.33714e+08	1.37212e+08	1.18176e+08
O94973	AP-2 complex subunit alpha-2	AP2A2	AP2A1;AP2A2	4.96992e+07	1.39846e+08	8.58118e+07	1.27285e+08	1.34841e+08	8.26208e+07	8.22902e+07	1.07776e+08	9.06656e+07	1.59315e+08	1.56759e+08	8.61037e+07	9.7334e+07	1.21721e+08	1.1085e+08	118890328	7.32894e+07	1.00255e+08	6.87815e+07	1.39563e+08	1.81272e+08	1.39261e+08	5.00566e+07	1.12047e+08	7.80253e+07	1.04805e+08	1.36394e+08	1.10617e+08	1.45338e+08	1.10931e+08	7.72206e+07	1.29715e+08	1.54722e+08	4.55865e+07	9.38697e+07	1.0989e+08	1.13258e+08	1.45438e+08	1.33468e+08	1.29352e+08	1.08265e+08	5.41297e+07	7.00615e+07	5.72647e+07	6.51589e+07	6.97845e+07
M0R0N4	AP complex subunit sigma	AP2S1	AP2S1	2.34187e+07	4.10222e+07	2.87679e+07	3.11387e+07	3.06085e+07	3.04214e+07	2.63848e+07	3.47073e+07	3.59606e+07	3.82137e+07	5.0111e+07	2.63934e+07	3.25958e+07	4.2724e+07	3.94684e+07	4.05101e+07	2.81962e+07	4.24738e+07	3.12589e+07	3.55507e+07	4.26508e+07	3.90582e+07	7.50629e+06	3.12864e+07	2.0189e+07	3.46133e+07	27930254	4.03356e+07	5.06309e+07	3.4329e+07	2.41835e+07	4.29556e+07	4.78625e+07	2.46226e+07	3.17303e+07	3.75019e+07	3.93354e+07	4.0858e+07	4.57277e+07	4.05826e+07	4.07374e+07	2.6301e+07	2.77399e+07	2.95216e+07	3.07767e+07	2.67361e+07
A0A0S2Z5J4	Adaptor-related protein complex 3 beta 1 subunit isoform 1 (Fragment)	AP3B1	AP3B1;AP3B2;DKFZp686D17136	0	0	0	1.51668e+06	0	0	1.55287e+06	0	0	1.91216e+06	0	0	1.16125e+06	1.07497e+06	0	0	0	0	0	1.90517e+06	0	1.19096e+06	0	1.49106e+06	0	0	1.84133e+06	1.5769e+06	2.15125e+06	1.44335e+06	0	1.95102e+06	0	0	0	0	2.06086e+06	0	0	0	1.69774e+06	0	0	1.08221e+06	0	0
O14617	AP-3 complex subunit delta-1	AP3D1	AP3D1	1.71698e+07	4.50289e+07	3.83523e+07	4.25281e+07	3.5471e+07	4.09896e+07	5.07963e+07	3.06356e+07	5.59089e+07	5.81326e+07	5.04569e+07	3.3338e+07	2.51763e+07	3.98371e+07	4.5946e+07	3.88151e+07	3.23014e+07	3.25867e+07	2.78521e+07	5.72352e+07	5.68069e+07	6.92265e+07	3.41942e+07	4.60691e+07	4.47783e+07	5.52997e+07	4.94935e+07	1.15781e+08	6.01085e+07	1.1056e+08	2.89805e+07	4.03587e+07	6.7756e+07	3.05922e+07	2.40923e+07	1.13874e+08	3.85177e+07	3.44444e+07	3.62927e+07	4.04497e+07	4.96866e+07	5.59362e+07	6.74772e+07	5.25533e+07	5.64817e+07	2.61921e+07
Q9Y2T2	AP-3 complex subunit mu-1	AP3M1	DKFZp586G1518;AP3M1;AP3M2	3.781e+07	5.12289e+07	2.60928e+07	4.17121e+07	3.55954e+07	2.20774e+07	3.72525e+07	3.07675e+07	3.35941e+07	5.36349e+07	4.34286e+07	3.80146e+07	3.90331e+07	3.56164e+07	5.31356e+07	4.32817e+07	2.89332e+07	3.16084e+07	3.33221e+07	4.29862e+07	4.61356e+07	3.85495e+07	2.83026e+07	4.46284e+07	4.25165e+07	3.47974e+07	4.75453e+07	4.04995e+07	5.05413e+07	4.12225e+07	2.90061e+07	6.63227e+07	4.44584e+07	3.0122e+07	3.61066e+07	4.28053e+07	4.82211e+07	4.81293e+07	6.43673e+07	4.38716e+07	4.69833e+07	3.78522e+07	2.53673e+07	3.73503e+07	2.97298e+07	3.48813e+07
P53677	AP-3 complex subunit mu-2	AP3M2	DKFZp586G1518;AP3M1;AP3M2	0	0	0	1.0793e+06	879325	443924	524378	0	1.03476e+06	2.04763e+06	0	855940	0	2.64196e+06	2.77198e+06	0	0	1.52452e+06	927230	5.35562e+06	8.23578e+06	6.80114e+06	4.47134e+06	0	0	2.7938e+06	2.72273e+06	1.12694e+06	1.51841e+06	1.30877e+06	2.54493e+06	982862	1.34785e+06	721066	0	0	4.42868e+06	4.81228e+06	2.03539e+06	1.0215e+06	1.33023e+06	3.87722e+06	2.39034e+06	0	548079	627047
Q2VPB7	AP-5 complex subunit beta-1	AP5B1	AP5B1	2.36971e+06	1.68139e+07	8.27363e+06	1.1166e+07	1.33813e+07	1.00037e+07	9.61119e+06	1.31774e+07	1.06975e+07	1.7045e+07	1.61745e+07	1.69825e+07	8.60305e+06	1.09783e+07	1.95108e+07	1.82606e+07	9.274e+06	1.7255e+07	6.4737e+06	29627318	23243592	3.5484e+07	2.71399e+07	1.63995e+07	8.48646e+06	1.22368e+07	1.09476e+07	1.36053e+07	2.52222e+07	1.12496e+07	8.78339e+06	2.0414e+07	1.67205e+07	6.54864e+06	1.1148e+07	12490443	1.57248e+07	1.66922e+07	1.6956e+07	1.44015e+07	1.16995e+07	1.77293e+06	7.6684e+06	6.02535e+06	0	8.42063e+06
C9JLV4	Apoptotic protease-activating factor 1	APAF1	APAF1	1.04224e+07	1.59844e+07	1.04646e+07	1.52952e+07	1.6061e+07	1.30183e+07	1.87454e+07	8.37736e+06	1.32277e+07	1.75414e+07	1.37927e+07	1.2253e+07	1.37796e+07	1.33332e+07	1.01055e+07	1.28789e+07	9.93646e+06	1.29546e+07	1.03433e+07	1.06371e+07	7.92106e+06	9.37721e+06	9.16462e+06	9.97812e+06	5.8707e+06	9.94509e+06	9.72664e+06	1.52102e+07	1.46272e+07	1.55088e+07	9.46804e+06	1.46494e+07	1.60727e+07	7.22576e+06	1.42411e+07	1.18925e+07	1.49693e+07	1.35892e+07	1.7949e+07	1.16391e+07	1.13112e+07	6.55991e+06	5.65385e+06	7.432e+06	4.55951e+06	9.52709e+06
Q7Z5R6	Amyloid beta A4 precursor protein-binding family B member 1-interacting protein	APBB1IP	APBB1IP	0	4.21164e+06	2.18179e+06	6.32495e+06	1.1451e+07	0	2.11592e+07	2.86151e+06	3.35646e+06	8.91066e+06	1.30491e+07	7.10394e+06	1.34424e+06	9.62907e+06	8.97662e+06	1.42351e+07	5.62705e+06	0	4.2568e+06	6.60828e+06	1.24613e+07	1.46296e+07	5.58032e+06	4.73263e+06	4.21043e+06	5.30501e+06	9.8865e+06	7.5809e+06	6.06793e+06	1.20519e+07	1.81147e+06	5.22658e+06	4.55641e+06	990125	242021	8.0545e+06	1.12098e+07	7.82643e+06	2.86437e+07	9.09011e+06	5.05554e+06	1.72485e+06	5.12489e+06	1.01102e+06	7.776e+06	2.25826e+06
P02743	Serum amyloid P-component	APCS	APCS	1.45546e+08	2.52347e+08	535914749	5.60884e+08	8.73564e+08	689355663	6.03105e+08	5.51289e+08	2.97517e+08	2.20861e+08	483666543	5.02901e+08	1440677519	6.21447e+08	461499079	3.5003e+08	4.28792e+08	4.24559e+08	5.35713e+08	3.04086e+08	7.81649e+08	5.7734e+08	1.36072e+08	9.23919e+07	7.28153e+08	3.55906e+08	4.85122e+08	4.2661e+08	1.09289e+08	4.8982e+08	3.43516e+08	1.41325e+08	4.97832e+08	2.71929e+08	4.62792e+08	7.2674e+08	222916121	110045442	2.45974e+08	1238779070	1.78689e+08	3.27724e+08	3.48675e+08	289360046	2.32266e+08	6.56294e+08
P13798	Acylamino-acid-releasing enzyme	APEH	APEH	8.89168e+07	6.12823e+07	6.7144e+07	1.37948e+08	6.67178e+07	6.12705e+07	8.02687e+07	9.50444e+07	9.08089e+07	107216268	8.04359e+07	9.96971e+07	4.12254e+07	1.1098e+08	8.68493e+07	8.96583e+07	8.89753e+07	1.25241e+08	4.44229e+07	1.06208e+08	6.88505e+07	8.77329e+07	1.19855e+08	9.5602e+07	1.15341e+08	7.16328e+07	7.96153e+07	8.11422e+07	1.04913e+08	7.94804e+07	8.64165e+07	8.18249e+07	100240082	8.14732e+07	6.41887e+07	8.43595e+07	8.45564e+07	8.80769e+07	1.12813e+08	6.26497e+07	1.01672e+08	7.65568e+07	2.95366e+07	7.71562e+07	9.95148e+07	4.67095e+07
Q5TZP7	DNA-(apurinic or apyrimidinic site) endonuclease	APEX1	APEX1;APE1	1.06387e+08	2.92391e+08	5.2373e+07	1.54992e+08	1.16903e+08	1.01496e+08	1.8829e+08	1.01427e+08	1.77898e+08	2.3829e+08	1.5306e+08	122845584	117105132	1.38054e+08	1.67853e+08	1.98395e+08	1.50888e+08	1.69452e+08	1.14623e+08	3.13464e+08	1.68972e+08	1.73264e+08	7.336e+07	1.07209e+08	6.0852e+07	1.14162e+08	8.73166e+07	184049804	4.97988e+08	1.96108e+08	1.27063e+08	2.14213e+08	3.35797e+08	5.35801e+07	127000723	1.04796e+08	1.37006e+08	2.38473e+08	2.02029e+08	1.58931e+08	1.49423e+08	8.63815e+07	5.50756e+07	5.8108e+07	1.5849e+08	7.45222e+07
Q9BZZ5	Apoptosis inhibitor 5	API5	API5	73325949	4.5783e+08	6.41044e+07	3.98307e+08	2.31933e+08	7.46564e+07	1.46618e+08	2.53615e+08	2.39377e+08	2.35725e+08	250922713	2.71527e+08	4.13244e+07	1.35311e+08	9.4274e+07	6.61729e+07	2.6177e+08	2.76067e+08	1.16533e+08	206457989	1.75307e+08	2.00408e+08	3.87263e+07	1.75015e+08	4.30658e+07	2.27541e+08	1.4921e+08	1.81234e+08	5.95139e+07	6.3581e+07	1.45661e+08	7.68448e+07	4.23328e+07	2.73489e+07	332465146	2.33883e+08	4.62439e+07	9.02594e+07	4.36373e+07	5.75716e+07	2.26256e+08	5.61467e+07	7.54283e+07	5.16734e+07	1.89736e+08	2.75951e+07
Q96GX9	Methylthioribulose-1-phosphate dehydratase	APIP	APIP	3.93204e+06	1.17057e+07	1.77725e+07	2.26608e+07	2.33255e+07	1.69969e+07	2.03866e+07	1.97298e+07	1.65584e+07	2.82392e+07	22783925	6.37808e+06	1.72671e+07	1.6115e+07	1.59207e+07	2.25366e+07	7.47569e+06	1.14519e+07	1.45795e+07	2.38091e+07	3.09991e+07	2.31612e+07	7.1467e+06	8.84453e+06	2.33769e+07	1.86531e+07	2.43093e+07	1.23131e+07	1.24792e+07	1.29421e+07	1.35228e+07	1.18251e+07	2.76209e+06	8.96183e+06	1.10108e+07	1.25693e+07	1.46194e+07	4.91976e+06	8.60169e+06	9.67295e+06	2.38073e+07	1.43653e+07	1.68673e+07	1.69342e+07	1.8971e+07	2.85236e+07
Q06481	Amyloid-like protein 2	APLP2	APLP2	8.22733e+06	1.45644e+07	2.87322e+07	2.77662e+07	4.82523e+07	3.80694e+07	5.5965e+07	5.02355e+07	3.64871e+07	1.88718e+07	4.42469e+07	3.11841e+07	1.01139e+07	4.8956e+07	1.54588e+07	2.8208e+07	2.09746e+07	2.42428e+07	2.09399e+07	2.11734e+07	1.26287e+07	2.11605e+07	1.05371e+07	1.81313e+07	1.64946e+07	4.97302e+07	3.92917e+07	1.60645e+07	7.16602e+06	1.10735e+07	1.07195e+07	6.25585e+06	1.29377e+07	1.64457e+07	1.65325e+07	1.41881e+07	1.32487e+07	1.38633e+07	4.5835e+06	6.55633e+06	1.71358e+07	9.6003e+06	1.11256e+07	9.75182e+06	6.75371e+06	2.26815e+07
Q9HDC9	Adipocyte plasma membrane-associated protein	APMAP	APMAP	8.7607e+07	179797364	178695068	319521879	2.41974e+08	1.58425e+08	2.73857e+08	2.07392e+08	1.90212e+08	3.88127e+08	2.39015e+08	2.0709e+08	163435822	2.1627e+08	1.88991e+08	2.84177e+08	186941556	3.13046e+08	1.43177e+08	2.38204e+08	1.11715e+08	1.19863e+08	1.76244e+08	2.08114e+08	1.45406e+08	2.33351e+08	2.32557e+08	144543653	2.29646e+08	1.87082e+08	8.77923e+07	9.70716e+07	2.04497e+08	6.19802e+07	1.72898e+08	9.18915e+07	1.43064e+08	1.48887e+08	1.61024e+08	1.41109e+08	128513058	8.1043e+07	9.90247e+07	1.13189e+08	5.41426e+07	6.67217e+07
P02647	Apolipoprotein A-I	APOA1	CACYBP;APOA1	2454418756	1484858654	4559758054	2893353695	2354192252	4163857726	2756409546	3207223001	2251917136	1787477312	1586315228	3124318145	1758915510	2104289072	2077100047	1842762889	2408180903	1944237429	2627779361	2068861815	3621570010	2164631003	7599478566	1785099395	5200204603	2724147213	1915015045	1437918394	1407748898	2003071861	3086806927	2322620308	1351453901	3077701832	1086444292	2588510456	1933004644	2544569077	1573909721	2867286568	1490719020	3281708084	5953408008	2141901848	2046180282	3202861998
B4DP80	NAD(P)H-hydrate epimerase	APOA1BP	APOA1BP;NAXE	1.70007e+07	8.46653e+07	2.40743e+07	9.34355e+07	4.00445e+07	4.04162e+07	4.07591e+07	4.32175e+07	8.07179e+07	1.12643e+08	6.30632e+07	6.97518e+07	3.30842e+07	3.90971e+07	6.03879e+07	7.70229e+07	3.8354e+07	8.761e+07	3.85917e+07	4.88054e+07	6.00108e+07	5.05336e+07	2.31625e+07	7.80372e+07	3.19045e+07	3.46829e+07	3.96684e+07	6.58245e+07	8.54661e+07	4.3157e+07	2.2465e+07	4.34548e+07	4.47645e+07	1.80879e+07	3.45432e+07	4.34247e+07	5.01208e+07	3.08133e+07	6.12789e+07	3.92862e+07	4.88562e+07	3.53951e+07	1.86887e+07	2.43561e+07	3.97165e+07	2.66294e+07
V9GYM3	Apolipoprotein A-II	APOA2	APOA2	428577629	224179181	6.62366e+08	2.26309e+08	2.85837e+08	633292494	340703186	4.2924e+08	2.84319e+08	1.43193e+08	2.16088e+08	267472716	2.48385e+08	2.4396e+08	2.46359e+08	2.94951e+08	2.6193e+08	2.36167e+08	2.93967e+08	2.80364e+08	3.94835e+08	2.96982e+08	697860658	259566991	4.41237e+08	3.30224e+08	2.31465e+08	1.92574e+08	2.22903e+08	3.48285e+08	5.45159e+08	358703193	1.85897e+08	536439226	2.16176e+08	453730975	2.88501e+08	2.99485e+08	1.97129e+08	5.25928e+08	2.66359e+08	5.08291e+08	4.78603e+08	3.7409e+08	5.32028e+08	489161093
P06727	Apolipoprotein A-IV	APOA4	APOA4	1.26891e+08	1.12432e+08	1.14268e+08	1.08424e+08	9.44184e+07	1.10535e+08	9.33776e+07	1.5998e+08	1.21636e+08	1.05996e+08	8.68197e+07	1.14938e+08	1.02435e+08	1.37438e+08	9.2047e+07	1.31048e+08	1.73246e+08	1.30922e+08	1.57585e+08	110505710	9.28217e+07	7.31088e+07	2.59835e+08	9.50365e+07	155546939	9.84177e+07	75281817	1.23218e+08	1.05576e+08	1.58122e+08	1.26128e+08	1.52818e+08	1.90694e+08	133911202	9.48793e+07	9.47147e+07	1.62879e+08	1.32719e+08	2.09934e+08	1.64391e+08	1.25223e+08	9.28441e+07	5.13236e+08	8.36941e+07	6.25102e+07	1.2561e+08
Q13784	APOA4 protein (Fragment)	APOA4	APOA4	4.06674e+07	6.11828e+07	2.69458e+07	3.14194e+07	2.58579e+07	2.97992e+07	4.19162e+07	2.39293e+07	5.99723e+07	7.01779e+07	4.19432e+07	6.40031e+07	4.82157e+07	2.79384e+07	3.42546e+07	4.31709e+07	3.21412e+07	4.70951e+07	2.80162e+07	67925135	3.95825e+07	5.102e+07	8.99412e+07	5.94044e+07	5.19071e+07	4.54228e+07	2.80874e+07	7.38555e+07	1.05413e+08	6.2324e+07	6.38813e+07	1.09609e+08	8.55291e+07	4.37471e+07	5.28513e+07	4.70504e+07	1.04642e+08	7.36238e+07	8.29545e+07	1.08278e+08	5.63343e+07	2.92904e+07	1.66335e+08	1.83244e+07	3.79557e+07	4.26927e+07
C0JYY2	Apolipoprotein B (Including Ag(X) antigen)	APOB	CHMP4A;APOB	648557374	6.33138e+08	7.07116e+08	7.61703e+08	6.73958e+08	1091879779	6.82033e+08	7.00409e+08	6.45254e+08	5.49089e+08	6.18795e+08	7.04607e+08	463898801	594430148	6.96877e+08	6.78007e+08	657714854	5.87259e+08	6.49052e+08	6.53534e+08	9.20057e+08	8.83482e+08	8.29875e+08	6.27719e+08	1235041658	8.00229e+08	7.57899e+08	6.40791e+08	6.14376e+08	7.39297e+08	651652696	8.06026e+08	5.40197e+08	7.25547e+08	4.32417e+08	6.23949e+08	6.78508e+08	7.84825e+08	6.90571e+08	7.0904e+08	497105436	4.66057e+08	5.36854e+08	5.78281e+08	4.73955e+08	6.64408e+08
Q9UH17	DNA dC->dU-editing enzyme APOBEC-3B	APOBEC3B	APOBEC3D;APOBEC3DE;APOBEC3A;APOBEC3B	0	2.85019e+06	0	0	0	0	0	0	2.1344e+06	0	0	0	3.09024e+06	1.52358e+06	0	0	0	1.94666e+06	2.35103e+06	0	0	0	0	1.0243e+06	0	0	0	2.91906e+06	4.49487e+06	1.65098e+06	2.26347e+06	0	3.04077e+06	2.23417e+06	1.78433e+06	1.78241e+06	1.70345e+06	1.81399e+06	6.59506e+06	1.43042e+06	0	1.7307e+06	2.0128e+06	974919	0	3.43284e+06
M4VR43	Apolipoprotein B editing enzyme catalytic polypeptide-like 3F	APOBEC3F	APOBEC3D;APOBEC3G;APOBEC3F;APOBEC3C;APOBEC3DE;A3G	0	0	0	0	0	0	0	0	0	0	0	0	0	0	0	0	0	0	0	924476	506538	902239	0	0	0	0	0	0	0	0	0	0	0	0	0	0	0	0	0	0	0	0	0	0	0	0
A0A4V7I447	Apolipoprotein B receptor	APOBR	APOB48R;APOBR	1.25177e+08	5.66917e+07	4.31884e+07	4.87023e+07	4.52996e+07	5.86931e+07	4.52991e+07	4.54925e+07	5.08802e+07	8.74228e+07	6.34578e+07	4.34018e+07	5.98572e+07	5.58807e+07	4.56318e+07	7.18156e+07	6.40715e+07	6.97623e+07	5.24328e+07	4.97685e+07	5.42718e+07	5.70406e+07	4.70258e+07	1.07795e+08	3.9535e+07	3.96887e+07	4.75623e+07	7.34748e+07	7.56734e+07	6.42209e+07	7.67097e+07	9.0671e+07	6.50532e+07	1.05689e+08	4.32999e+07	8.58899e+07	7.01028e+07	7.38192e+07	1.0243e+08	9.74262e+07	4.72282e+07	1.04452e+08	6.32613e+07	7.56531e+07	6.23806e+07	9.03631e+07
P02654	Apolipoprotein C-I	APOC1	APOC1	5.27507e+07	6.68035e+07	6.90383e+07	4.3017e+07	3.49043e+07	6.06819e+07	4.5633e+07	4.95378e+07	3.23992e+07	3.64969e+07	7.89582e+07	5.04545e+07	2.22739e+08	6.94787e+07	4.8931e+07	6.18468e+07	3.42821e+07	5.9457e+07	5.9646e+07	33813268	9.59913e+07	6.12117e+07	138258130	3.65013e+07	1.13807e+08	4.38605e+07	3.89698e+07	5.28384e+07	3.69798e+07	8.84969e+07	1.55828e+08	5.66538e+07	6.79566e+07	9.57553e+07	1.04744e+08	140267980	1.37459e+08	9.29406e+07	3.63077e+07	1.76466e+08	1.65064e+08	8.7458e+07	2.40523e+08	1.16067e+08	6.99425e+07	1.4828e+08
A3KPE2	Apolipoprotein C-III	APOC3	APOC3	1.62047e+08	8.23822e+07	1.07723e+08	6.2335e+07	7.23076e+07	6.74169e+07	5.2689e+07	8.28739e+07	4.77596e+07	7.86062e+07	5.0567e+07	7.4495e+07	7.88569e+07	7.06142e+07	1.9131e+08	9.80462e+07	9.2332e+07	1.14548e+08	9.31432e+07	4.40351e+07	8.59399e+07	8.22073e+07	8.46392e+07	2.17657e+08	1.47038e+08	7.17908e+07	3.57994e+07	1.08545e+08	4.07542e+07	1.4178e+08	1.98233e+08	9.33632e+07	6.96487e+07	241057966	6.83267e+07	1.23254e+08	8.58749e+07	1.01724e+08	8.42207e+07	1.12899e+08	6.92096e+07	7.58553e+07	1.39526e+08	7.69666e+07	6.97983e+07	1.28495e+08
K7ER74	Apolipoprotein C-II	APOC4-APOC2	APOC4-APOC2;APOC2;APOC4	5.92223e+07	3.5218e+07	2.97432e+07	1.11594e+07	1.93483e+07	2.723e+07	1.08382e+07	3.40519e+07	1.32442e+07	6.44962e+06	1.55817e+07	1.37562e+07	2.23691e+07	7.01181e+06	2.48971e+07	1.81428e+07	1.78366e+07	4.02411e+07	1.86497e+07	4.82665e+06	1.74154e+07	1.0703e+07	2.44128e+07	1.71659e+07	3.27133e+07	1.56501e+07	1.6051e+07	1.79042e+07	1.573e+07	4.68916e+07	7.50559e+07	1.52492e+07	1.77833e+07	8.31501e+07	2.28668e+07	3.75198e+07	3.10711e+07	9.73695e+06	2.30586e+07	3.17869e+07	1.98706e+07	1.13275e+07	2.0384e+07	1.50154e+07	2.23421e+07	2.13991e+07
C9JF17	Apolipoprotein D (Fragment)	APOD	APOD	5.00613e+07	4.19518e+07	7.47757e+07	9.79432e+07	7.72331e+07	8.88855e+07	8.17498e+07	6.11344e+07	4.72073e+07	4.05537e+07	3.71366e+07	5.45993e+07	4.02963e+07	9.65579e+07	4.02746e+07	3.67907e+07	156176281	3.99404e+07	9.40408e+07	4.67816e+07	5.44176e+07	4.18042e+07	8.29097e+07	3.40527e+07	9.09075e+07	7.7391e+07	5.90137e+07	4.57091e+07	2.83613e+07	5.31158e+07	7.67783e+07	7.54448e+07	8.27562e+07	8.4916e+07	4.33327e+07	4.01636e+07	4.49934e+07	4.25764e+07	2.92222e+07	5.49531e+07	5.08248e+07	7.7936e+07	66308755	6.977e+07	6.72839e+07	5.56047e+07
P02649	Apolipoprotein E	APOE	APOE	579982836	1.49986e+08	2.90426e+08	3.78647e+08	3.05763e+08	3.07745e+08	2.54526e+08	3.10622e+08	2.24527e+08	1.35227e+08	2.47673e+08	360125375	3.93613e+08	3.26123e+08	2.04563e+08	2.50207e+08	2.44682e+08	183793853	3.00011e+08	1.43473e+08	2.7049e+08	1.79392e+08	1110765120	1.02104e+08	4.39667e+08	2.7853e+08	2.14154e+08	2.9957e+08	1.25269e+08	2.07551e+08	3.12409e+08	2.10322e+08	3.5585e+08	4.23919e+08	3.39927e+08	2.7868e+08	3.97162e+08	2.04711e+08	1.98555e+08	495910698	2.22588e+08	2.7325e+08	1027211712	3.50159e+08	3.01485e+08	3.21945e+08
Q8TCZ8	Apolipoprotein E (Fragment)	APOE	APOE	1.56583e+06	7.40825e+06	1.85877e+06	2.05011e+06	15498516	1.22077e+06	2.34075e+06	2.26297e+06	2.69649e+06	3.01857e+06	2.58557e+06	1.29614e+07	2.18822e+06	2.85353e+06	6.10474e+06	2.88663e+06	3.39598e+06	2.35025e+06	2.22026e+06	4.55191e+06	3.42687e+06	7.09625e+06	4.4343e+06	3.15046e+06	3.0239e+06	2.27944e+06	3.76156e+06	8.07523e+06	7.53204e+06	8.91557e+06	0	0	3.66239e+06	0	1.02755e+06	3.26679e+06	3.74451e+06	6.63413e+06	631511	0	1.28847e+06	3.71988e+06	3.20443e+06	2.17396e+06	4.77385e+06	1.9836e+06
Q13790	Apolipoprotein F	APOF	APOF	1.51779e+07	0	0	0	0	0	0	0	4.66065e+06	7.77647e+06	0	0	0	0	0	5.9679e+06	0	0	0	4247446	0	0	4.68921e+06	0	0	0	0	0	2.13497e+06	0	1.47571e+07	0	0	0	0	0	0	0	0	3.69911e+07	0	0	998234	0	0	0
U5LKM6	Apolipoprotein L1 (Fragment)	APOL1	APOL1	7.79253e+06	8.86279e+06	9.34964e+06	1.49569e+07	1.50821e+07	2.12522e+07	2.10301e+07	1.43045e+07	2.1343e+07	1.67285e+07	1.58062e+07	1.37946e+07	6.34929e+06	1.70034e+07	1.32078e+07	9.29441e+06	1.64301e+07	1.88087e+07	1.74203e+07	1.51345e+07	1.12265e+07	1.65318e+07	3.65647e+07	1.09492e+07	7.93234e+06	1.23195e+07	6.51835e+06	6.66325e+06	5.27534e+06	1.11007e+07	8.56409e+06	1.48908e+07	8.72697e+06	2.63853e+06	5.03451e+06	1.01161e+07	7.48215e+06	9.98143e+06	1.34698e+07	9.11543e+06	1.1702e+07	8.20611e+06	2.15064e+07	1.06881e+07	1.66734e+07	3.75965e+06
A0A024R1M8	Apolipoprotein L, 2, isoform CRA_a	APOL2	APOL2	7.39204e+07	8.88124e+07	6.01654e+07	8.9821e+07	7.3792e+07	5.94624e+07	1.03349e+08	8.0895e+07	1.17284e+08	9.62672e+07	9.63854e+07	9.84159e+07	7.02924e+07	9.6335e+07	9.95696e+07	1.15803e+08	7.84637e+07	7.20132e+07	8.32341e+07	9.91858e+07	9.15047e+07	1.11728e+08	1.04527e+08	7.38837e+07	7.3974e+07	7.32712e+07	9.16172e+07	8.47655e+07	1.25019e+08	8.49322e+07	6.4029e+07	9.59568e+07	1.00937e+08	3.90916e+07	8.34898e+07	8.14995e+07	1.11484e+08	9.30703e+07	1.48033e+08	8.68009e+07	1.01681e+08	6.87949e+07	5.39809e+07	7.28343e+07	5.65656e+07	7.37961e+07
A0A024R1G6	Apolipoprotein L, 3, isoform CRA_a	APOL3	APOL3	2.59315e+08	3.70321e+07	7.63156e+07	5.80648e+07	3.48199e+07	6.99191e+07	2.45659e+07	1.04169e+08	1.2882e+08	3.07502e+07	2.3334e+07	8.75682e+07	8.34794e+07	7.26571e+07	8.59604e+07	5.53421e+07	1.10336e+08	1.13286e+08	8.49363e+07	1.99411e+07	3.15256e+07	5.76745e+06	1.01092e+08	1.34258e+07	1.26131e+08	6.3894e+07	4.5203e+07	7.95351e+07	2.56155e+07	7.0939e+07	2.39725e+08	2.69127e+07	4.39007e+07	2.58366e+08	1.65036e+08	3.59142e+07	2.40302e+07	8.91556e+06	2.5813e+07	9.0267e+07	5.05946e+07	1.234e+08	2.9712e+07	9.94405e+07	1.06182e+08	6.19803e+07
Q9BUR5	MICOS complex subunit MIC26	APOO	APOO	5.52976e+06	4.58756e+06	7.71595e+06	1.20331e+07	1.18408e+07	1.32722e+07	14103702	1.20725e+07	1.17579e+07	7.98471e+06	1.22454e+07	4.55935e+06	5.20077e+06	1.26622e+07	8.03622e+06	1.09243e+07	1.042e+07	1.64435e+07	6.55662e+06	1.24787e+07	9.86477e+06	1.16105e+07	1.23683e+06	5.17948e+06	1.24136e+06	8.45574e+06	1.08878e+07	8.61261e+06	1.31344e+07	7.89847e+06	7.44919e+06	1.09613e+07	7.27507e+06	1.52978e+07	5.73951e+06	5.98126e+06	5.85212e+06	6.73916e+06	1.40296e+07	6.55658e+06	1.06466e+07	5.3833e+06	0	3.53385e+06	4.26628e+06	4.97415e+06
Q6UXV4	MICOS complex subunit MIC27	APOOL	DKFZp779P1227;APOOL	5.33681e+06	8.95915e+06	1.39063e+07	8.78625e+06	1.01873e+07	2.184e+07	1.88077e+07	1.64995e+07	8.4155e+06	1.45021e+07	4.01181e+06	6.98552e+06	8.44169e+06	1.37045e+07	4.20814e+06	7.11326e+06	1.57866e+07	1.1097e+07	1.59437e+07	5.00811e+06	1.36651e+07	1.53307e+07	7.01949e+06	3.39461e+07	6.00203e+06	1.19732e+07	1.6095e+07	1.73257e+07	9.14301e+06	8.24512e+06	1.11104e+07	7.67271e+06	8.87651e+06	1.29096e+07	1.65945e+07	4.87756e+06	7.98567e+06	5.30731e+06	1.28911e+07	8.22857e+06	17020735	7.26708e+06	3.95723e+06	6.9071e+06	9.6279e+06	5.6868e+06
Q9UKG1	DCC-interacting protein 13-alpha	APPL1	APPL1;ERP70;PDIA4;ZNF830	4.38327e+07	6.96577e+07	1.29816e+08	1.14264e+08	126247663	1.22909e+08	118799333	9.53634e+07	9.64804e+07	9.19e+07	1.01177e+08	9.0958e+07	9.59465e+07	112867454	7.9605e+07	9.79989e+07	8.94441e+07	1.2059e+08	1.06066e+08	1.13603e+08	1.21692e+08	9.38905e+07	5.40776e+07	5.67891e+07	7.42051e+07	1.26878e+08	1.72141e+08	1.04166e+08	8.08834e+07	6.49486e+07	1.08056e+08	8.71867e+07	1.04152e+08	1.12627e+08	1.13881e+08	8.6617e+07	9.97142e+07	6.77206e+07	1.38805e+08	8.63276e+07	9.46283e+07	66617933	5.63289e+07	9.79173e+07	1.01842e+08	8.65152e+07
P07741	Adenine phosphoribosyltransferase	APRT	APRT	8.03599e+07	2.1852e+08	3.13367e+07	8.04353e+07	6.2989e+07	4.01171e+07	9.87619e+07	7.54483e+07	1.69778e+08	1.18952e+08	1.02377e+08	1.31667e+08	136910000	7.06644e+07	1.67142e+08	1.14513e+08	1.253e+08	183504132	8.78657e+07	1.35336e+08	8.76947e+07	1.37999e+08	1.07447e+08	9.54389e+07	4.66367e+07	7.6459e+07	6.30613e+07	1.13049e+08	1.47168e+08	9.79919e+07	9.60291e+07	1.085e+08	1.33122e+08	1.00794e+08	2.31169e+08	1.15176e+08	1.09693e+08	1.03301e+08	1.94727e+08	1.14263e+08	1.81059e+08	8.51492e+07	7.81444e+07	6.75554e+07	1.07895e+08	8.71822e+07
B4E034	Aquaglyceroporin-3	AQP3	AQP3	0	0	6.71161e+06	5.90007e+06	0	0	0	0	0	1.44061e+06	4.16608e+06	0	0	0	0	0	2.36744e+06	0	3.01845e+06	0	0	1.67749e+06	0	0	5.05726e+06	0	0	0	0	0	807844	0	0	954775	0	0	0	0	1.12882e+06	0	0	0	0	0	0	0
F1DSG4	Aquaporin 4 transcript variant a	AQP4	AQP4	2.94643e+07	4.02809e+06	7.8009e+07	3.87314e+07	3.41703e+07	4.35762e+07	5.06804e+07	3.19084e+07	8.56251e+06	1.49295e+07	1.59877e+06	0	1.17974e+06	2.86829e+06	2.7588e+07	7.41571e+06	2.02872e+07	4.11955e+07	2.21007e+07	3.80658e+06	9.22099e+06	1.64323e+07	1.16897e+06	1.153e+07	1.4906e+07	3.50663e+07	6.7407e+07	8.06801e+06	2.95628e+06	6.84553e+06	6.84235e+06	2.7517e+07	2.53373e+06	2.86408e+07	5.76951e+06	0	5.60782e+06	4.17094e+06	1.02658e+07	1.26012e+07	2.83524e+07	1.03181e+07	4.79027e+06	4.7722e+07	1.64491e+07	9.09274e+06
L0R6C7	Alternative protein AQP4	AQP4	AQP4	5.52815e+07	2.70677e+07	4.00015e+07	3.447e+07	2.6839e+07	3.37405e+07	1.39839e+07	4.15224e+07	2.7412e+07	2.76644e+07	2.15987e+07	3.08404e+07	7.90846e+07	2.94005e+07	7.7576e+07	2.98733e+07	4.99086e+07	3.83963e+07	4.50174e+07	2.76275e+07	4.18219e+07	2.88027e+07	5.21088e+07	1.92964e+06	7.22343e+07	4.11187e+07	3.35912e+07	5.72857e+07	1.71661e+07	3.42757e+07	4.18928e+07	3.95722e+07	3.08932e+07	4.54029e+07	3.77379e+07	3.18766e+07	1.29481e+07	1.42498e+06	1.18806e+07	5.40031e+07	1.30929e+07	6.05126e+07	6.76898e+07	2.55173e+07	6.71421e+07	4.70083e+07
P55064	Aquaporin-5	AQP5	AQP5	1.32099e+06	969886	1.86465e+06	4.25728e+06	650420	1.99922e+06	1.03053e+07	4.44862e+06	1.90218e+07	1.90077e+06	0	5.46169e+06	2.2815e+06	2.29388e+06	2.17526e+06	2.39375e+06	1.5342e+07	1.28411e+07	2.39739e+06	1.53556e+07	1.02017e+07	2.058e+06	0	1.95807e+07	2.19137e+06	6.30718e+06	7.25923e+06	1.51712e+06	378285	0	3.62729e+06	0	0	2.68409e+06	0	1.77287e+06	0	1.97074e+06	0	2.23065e+06	2.40258e+06	1.14907e+06	0	1.38902e+06	0	0
A0A024R9L1	RNA helicase aquarius	AQR	AQR	1.57224e+06	7.49225e+06	9.65697e+06	1.14378e+07	1.12012e+07	7.45625e+06	1.5111e+07	1.26266e+07	7.76156e+06	4.30878e+06	1.03406e+07	4.49268e+06	5.44714e+06	1.01478e+07	5.28892e+06	7.91071e+06	5.88327e+06	9.40787e+06	9.06083e+06	1.07916e+07	9.85444e+06	1.14196e+07	3.44439e+06	4.97626e+06	2.58001e+06	1.34976e+07	1.45916e+07	3.47004e+06	9.39536e+06	6.78662e+06	3.4173e+06	4.44766e+06	3.70871e+06	0	1.44089e+06	5.25711e+06	6.53532e+06	7.47529e+06	1.01904e+07	5.30928e+06	4.9453e+06	0	6.06336e+06	1.14498e+06	1.55363e+06	2.4122e+06
A0A024R178	Non-specific serine/threonine protein kinase	ARAF	RAF1;GTF2I;ARAF;BRAF;SRGAP3:RAF1	0	2.14873e+06	833559	745868	932288	530357	2.05032e+06	2.40809e+06	2.14133e+06	1.68457e+06	1.1353e+06	0	0	834212	833444	2.04194e+06	985738	1.69361e+06	0	2.05771e+06	1.56868e+06	1.61756e+06	4.73288e+06	0	0	1.6815e+06	2.11711e+06	0	2.63086e+06	1.81161e+06	0	743428	2.32103e+06	0	1.37907e+06	1.4042e+06	980982	990694	1.43622e+06	1.74771e+06	904683	1.64883e+06	6.35931e+07	0	1.54412e+06	1.83587e+06
Q96P48	Arf-GAP with Rho-GAP domain, ANK repeat and PH domain-containing protein 1	ARAP1	FLJ00357;ARAP1	2.36153e+06	1.18725e+07	5.29955e+07	6.47004e+07	8.33726e+07	2.8795e+07	7.68464e+07	4.8078e+07	3.79741e+07	6.23482e+07	3.91816e+07	2.46785e+07	1.6509e+07	4.69979e+07	5.0148e+07	3.22402e+07	2.65295e+07	2.26082e+07	1.98504e+07	3.64764e+07	6.14045e+07	4.62826e+07	3.97789e+07	2.11409e+07	4.00572e+07	9.28879e+07	8.0409e+07	3.95836e+07	2.4238e+07	1.8033e+07	3.05736e+07	2.90373e+07	3.59862e+07	3.70091e+07	7.34562e+07	1.74607e+07	2.75986e+07	2.27521e+07	1.72092e+07	1.95204e+07	3.24156e+07	2.16669e+07	3.50101e+07	1.32462e+07	1.65416e+07	1.34371e+07
B0YIW5	Coatomer subunit delta	ARCN1	DKFZp686M09245;ARCN1	1.23741e+08	1.83713e+08	1.05747e+08	2.14171e+08	1.24297e+08	1.21312e+08	1.78163e+08	1.5847e+08	1.73936e+08	2.11908e+08	2.44352e+08	1.98476e+08	1.18117e+08	1.69567e+08	1.97773e+08	2.02715e+08	1.89715e+08	1.99396e+08	1.21642e+08	2.72893e+08	2.12176e+08	2.51334e+08	1.7492e+08	2.61174e+08	7.60094e+07	1.74e+08	157879702	2.14608e+08	2.1242e+08	1.69805e+08	1.02458e+08	2.54007e+08	197122124	6.45418e+07	9.55313e+07	1.80483e+08	357873159	2.37214e+08	2.74614e+08	2.07852e+08	1.91816e+08	7.77904e+07	1.16036e+08	8.19498e+07	1.01741e+08	1.3563e+08
A0A024R3Q0	ADP-ribosylation factor 1, isoform CRA_a	ARF1	ARF3;ARF1;ARF6;ARF5;ARF4;ARL11;LOC107984156;ARL17B;ARL17A	4.2231e+07	1.19787e+08	8.36141e+07	1.62938e+08	1.51332e+08	1.01411e+08	1.12242e+08	1.15972e+08	1.0354e+08	1.4531e+08	1.53201e+08	1.01983e+08	6.47766e+07	1.22009e+08	1.18028e+08	136872822	1.04207e+08	1.61312e+08	9.98125e+07	1.80307e+08	1.36277e+08	1.75826e+08	9.54474e+07	1.32038e+08	8.90182e+07	1.155e+08	1.71947e+08	1.08238e+08	1.51223e+08	1.06455e+08	9.03914e+07	1.2179e+08	1.20455e+08	5.64489e+07	7.70667e+07	1.14844e+08	1.22239e+08	1.24144e+08	1.25612e+08	101634303	8.50575e+07	7.69759e+07	9.61337e+07	6.99034e+07	7.75056e+07	8.87355e+07
P18085	ADP-ribosylation factor 4	ARF4	ARF3;ARF1;ARF6;ARF5;ARF4;ARL11;LOC107984156;ARL17B;ARL17A	1.59963e+07	1.03916e+08	4.58418e+07	9.42921e+07	7.43483e+07	8.53289e+07	1.20603e+08	9.88848e+07	1.23196e+08	1.31646e+08	1.30147e+08	8.08248e+07	7.27296e+07	119094494	1.24952e+08	1.10303e+08	8.37346e+07	1.28276e+08	5.81671e+07	122833810	9.92669e+07	1.76037e+08	5.76983e+07	2.89033e+08	3.85962e+07	1.04856e+08	1.26388e+08	1.30181e+08	1.15627e+08	126913842	1.14929e+08	1.40595e+08	1.22522e+08	3.74634e+07	6.69952e+07	9.72212e+07	1.4377e+08	1.62347e+08	1.76614e+08	9.60335e+07	1.20257e+08	3.67222e+07	5.84453e+07	3.51257e+07	4.15904e+07	4.03366e+07
A4D0Z3	ADP-ribosylation factor 5	ARF5	ARF3;ARF1;ARF6;ARF5;ARF4;ARL11;LOC107984156;ARL17B;ARL17A	8.14694e+07	1.19333e+08	1.04622e+08	1.70382e+08	1.33887e+08	1.02113e+08	2.23031e+08	1.22931e+08	1.16776e+08	1.84365e+08	112615577	191874965	8.7608e+07	1.05402e+08	8.36234e+07	1.64416e+08	9.54779e+07	1.17731e+08	108914173	2.04811e+08	1.36469e+08	146395355	2.38043e+08	6.71632e+07	1.49598e+08	1.57594e+08	1.17253e+08	1.2268e+08	2.43544e+08	1.19229e+08	6.42322e+07	1.61448e+08	1.13692e+08	8.36365e+07	1.0547e+08	1.14944e+08	1.08939e+08	9.94824e+07	2.38816e+08	1.33495e+08	1.1461e+08	1.07596e+08	8.39557e+07	6.29216e+07	92794346	8.6749e+07
P62330	ADP-ribosylation factor 6	ARF6	ARF3;ARF1;ARF6;ARF5;ARF4;ARL11;LOC107984156;TRIM23;ARL17B;ARL17A	2.52844e+07	2.87625e+07	1.52172e+07	2.56073e+07	2.03706e+07	1.85101e+07	3.49451e+07	2.19913e+07	41037667	2.48306e+07	2.92948e+07	2.3699e+07	2.31924e+07	3.70528e+07	3.22457e+07	4.07629e+07	4.72858e+07	5.52994e+07	4.77705e+07	2.2886e+07	2.58495e+07	2.5124e+07	7.65379e+06	2.25404e+07	6.41737e+06	1.90387e+07	2.7973e+07	3.15494e+07	3.63115e+07	3.14426e+07	4.19947e+07	2.97649e+07	2.6678e+07	3.50521e+07	3.11732e+07	3.13309e+07	2.6854e+07	2.3453e+07	2.9807e+07	3.79673e+07	3.10155e+07	2.24311e+07	1.95801e+07	1.71255e+07	7.934e+06	3.46776e+07
Q8N6T3	ADP-ribosylation factor GTPase-activating protein 1	ARFGAP1	ARFGAP1	1.51159e+07	7.32616e+07	1.40729e+07	4.1707e+07	2.96142e+07	4.86962e+07	2.60704e+07	2.0811e+07	3.21976e+07	4.53355e+07	6.83165e+07	3.34834e+07	6.09363e+07	8.78736e+07	3.90684e+07	3.43179e+07	4.76206e+07	7.65295e+07	2.55037e+07	4.67038e+07	4.11483e+07	2.59519e+07	5.21885e+07	5.01179e+08	1.58658e+07	4.18055e+07	2.76561e+07	6.90356e+07	6.0543e+07	1.33674e+08	1.11412e+08	5.10387e+07	1.5744e+08	1.0457e+08	6.20843e+07	5.13885e+07	3.83572e+07	4.89888e+07	8.45815e+07	7.62483e+07	1.5415e+07	8.99224e+06	7.02918e+07	1.41578e+07	2.06154e+07	8.3466e+07
A0A0D9SF70	ADP-ribosylation factor GTPase-activating protein 2	ARFGAP2	ARFGAP2;ARFGAP3	8.46077e+06	2.66585e+07	1.03864e+07	2.12071e+07	1.36413e+07	1.60152e+07	2.02467e+07	2.20518e+07	1.48194e+07	2.17633e+07	1.64275e+07	1.2263e+07	3.55566e+06	11917117	1.63404e+07	2.08407e+07	1.66612e+07	2.56687e+07	9.88466e+06	20884048	1.91592e+07	1.36773e+07	1.59361e+07	2.20781e+07	3.74381e+07	1.5136e+07	1.75576e+07	1.015e+07	1.96328e+07	3.21509e+07	2.6104e+07	1.45523e+07	1.26782e+07	3.60136e+06	5.09733e+06	9.85046e+06	2.97544e+07	1.73005e+07	4.0698e+07	1.72715e+07	1.41931e+07	3.19546e+06	2.50469e+06	4.92736e+06	8.48586e+06	5.92843e+06
A0A024R7X0	ADP-ribosylation factor guanine nucleotide-exchange factor 1(Brefeldin A-inhibited), isoform CRA_a	ARFGEF1	ARFGEF1;ARFGEF2	0	9.61588e+06	2.19589e+06	1.38285e+07	1.07391e+07	6.80251e+06	1.02979e+07	3.22918e+06	7.83478e+06	4.40625e+06	8.3657e+06	3.96136e+06	7.42062e+06	7.19594e+06	843002	1.60329e+07	1.80298e+06	3.17445e+06	2.75358e+06	7.06498e+06	4.66322e+06	1.06961e+07	3.98463e+06	3.83388e+06	2.54198e+06	954318	1.54503e+07	1.20202e+06	4.65112e+06	3.3647e+06	6.81182e+06	2.48774e+06	7.0032e+06	2.33394e+06	1.3041e+06	0	7.01068e+06	4.85229e+06	4.18794e+06	7.72102e+06	2.46106e+06	3.68844e+06	3.77647e+06	1.88828e+06	0	4.75971e+06
E5RHL7	Brefeldin A-inhibited guanine nucleotide-exchange protein 1 (Fragment)	ARFGEF1	ARFGEF1;ARFGEF2	2.30391e+06	2.25238e+06	0	2.15541e+06	785833	1.61367e+06	0	0	5.70981e+06	0	0	0	2.34765e+06	6.74803e+06	0	0	0	0	0	0	2.94763e+06	0	0	0	1.03376e+06	0	0	0	0	0	3.35525e+06	0	0	1.89184e+06	0	2.82621e+06	0	2.46813e+06	0	0	0	2.85592e+06	0	1.84028e+06	3.81438e+06	0
Q9Y6D5	Brefeldin A-inhibited guanine nucleotide-exchange protein 2	ARFGEF2	ARFGEF1;ARFGEF2	1.22253e+07	2.78513e+07	2.20032e+07	3.20818e+07	2.13108e+07	2.6021e+07	4.18727e+07	1.85053e+07	2.01074e+07	2.72454e+07	2.17782e+07	1.57843e+07	2.00218e+07	1.59422e+07	1.29684e+07	2.26211e+07	1.62251e+07	2.41873e+07	1.64694e+07	2.0687e+07	1.58653e+07	2.38249e+07	1.44434e+07	2.66698e+07	1.29128e+07	1.61727e+07	1.80294e+07	2.22511e+07	3.29073e+07	2.09059e+07	1.97121e+07	4.06884e+07	2.68771e+07	1.42444e+07	9.66756e+06	1.5008e+07	1.83995e+07	1.21876e+07	2.98305e+07	1.92716e+07	2.55371e+07	3.79947e+06	1.30023e+07	5.00349e+06	7.47989e+06	1.55457e+07
P53367	Arfaptin-1	ARFIP1	ARFIP1;ARFIP2	2.72869e+07	4.1121e+07	6.68045e+07	5.81489e+07	6.4454e+07	4.87095e+07	4.97497e+07	7.31139e+07	5.62913e+07	5.1825e+07	6.1978e+07	7.01352e+07	3.87181e+07	6.39159e+07	5.14279e+07	5.43388e+07	3.65832e+07	6.72643e+07	4.3656e+07	5.16314e+07	7.00081e+07	5.63754e+07	4.49182e+07	4.1069e+07	4.74987e+07	6.96523e+07	7.93746e+07	2.84767e+07	5.52464e+07	4.15908e+07	3.53652e+07	4.5979e+07	3.93838e+07	3.19227e+07	3.69457e+07	4.13401e+07	3.44421e+07	5.33167e+07	4.72e+07	4.01287e+07	4.80668e+07	2.82766e+07	2.26871e+07	3.35751e+07	2.00847e+07	3.18002e+07
P53365	Arfaptin-2	ARFIP2	ARFIP1;ARFIP2	8.54206e+06	8.16089e+06	7.55772e+06	8.33598e+06	1.15901e+07	4.33551e+06	1.08194e+07	8.93906e+06	9.10154e+06	1.04356e+07	6.22862e+06	6.81069e+06	1.65469e+07	1.03346e+07	7.56503e+06	8.51383e+06	7.34645e+06	1.01885e+07	4.74221e+06	9.19739e+06	6.16327e+06	5.66615e+06	4.76836e+06	5.26937e+06	4.60066e+06	8.81815e+06	7.13427e+06	9.21413e+06	9.09569e+06	9.66526e+06	5.18272e+06	1.2825e+07	6.86448e+06	0	2.36176e+07	8.47038e+06	8.49083e+06	5.4128e+06	9.9387e+06	1.13794e+07	1.28368e+07	5.64904e+06	2.76848e+06	5.87977e+06	1.21381e+07	8.21256e+06
P05089	Arginase-1	ARG1	ARG1	0	0	1.30561e+06	0	1.9188e+06	3.16096e+06	2.06123e+06	2.01827e+06	947844	3.96235e+06	2.53815e+06	0	968289	3.24509e+06	1.71352e+06	2.63143e+06	4.14926e+06	1.21782e+06	0	4.03684e+06	2.83809e+06	2.50874e+06	2.86286e+06	0	1.80986e+06	3.47187e+06	1.58395e+06	0	0	4.25454e+06	1.55204e+06	0	1.54224e+06	2.4828e+06	0	4.88546e+06	1.35343e+06	1.12126e+06	5.84685e+06	1.52351e+06	2.52228e+06	0	741569	3.50893e+06	0	2.9194e+06
Q6ICQ8	ARHG protein (Fragment)	ARHG	RAC2;RAC3;RAC1;RHOQ;RHOJ;ARHG;CDC42	1.39701e+07	4.65972e+07	1.01352e+08	9.86566e+07	1.11958e+08	3.47165e+07	9.54042e+07	8.31805e+07	1.29197e+08	9.42706e+07	1.13504e+08	3.23826e+07	7.6149e+07	7.56825e+07	1.35766e+08	1.17081e+08	1.26347e+08	6.56591e+07	5.83688e+07	5.24464e+07	1.10395e+08	7.98966e+07	9.86022e+07	3.9842e+07	1.03919e+08	4.08378e+07	107324896	6.46415e+07	7.55692e+07	6.64275e+07	5.67267e+07	4.84175e+07	6.26423e+07	5.77381e+07	6.34045e+07	6.02792e+07	7.58692e+07	6.87789e+07	1.0381e+08	7.95621e+07	1.28144e+08	3.25605e+07	4.89882e+07	3.58564e+07	4.95408e+07	9.02198e+07
Q07960	Rho GTPase-activating protein 1	ARHGAP1	ARHGAP1	5.09563e+07	2.17848e+08	1.00104e+08	1.38628e+08	1.43878e+08	1.07693e+08	1.04174e+08	1.08769e+08	1.41328e+08	1.61701e+08	2.44321e+08	1.04177e+08	2.21442e+08	1.69848e+08	1.15282e+08	1.25077e+08	1.17374e+08	1.4288e+08	1.19731e+08	175714166	1.44206e+08	1.60696e+08	1.29536e+08	1.95794e+08	7.73021e+07	1.62384e+08	1.28668e+08	1.15275e+08	1.00059e+08	1.55146e+08	9.81229e+07	1.43442e+08	1.56561e+08	5.51067e+07	9.72825e+07	1.48415e+08	1.99628e+08	2.02411e+08	1.48903e+08	1.6183e+08	1.51854e+08	8.47714e+07	1.29094e+08	1.39894e+08	9.03266e+07	1.21597e+08
A0A2X0SFB3	ARHGAP10	ARHGAP10	ARHGAP10	0	0	1.17213e+06	1.3338e+06	0	0	0	0	0	0	0	0	0	0	0	0	0	0	0	0	2.679e+06	0	0	0	1.45449e+06	875973	1.29321e+06	0	0	0	0	0	0	0	0	0	0	0	560356	624819	0	0	0	0	524675	0
A0A2X0TVR3	ARHGAP12 (Fragment)	ARHGAP12	ARHGAP12	7.43934e+06	0	2.38388e+07	1.17695e+07	9.86962e+06	1.12676e+07	9.76482e+06	6.93452e+06	4.16534e+06	3.14379e+06	2.22359e+06	2.94783e+06	8.89533e+06	7.61564e+06	6.18601e+06	8.25498e+06	5.61835e+06	7.43788e+06	1.82731e+07	4.72106e+06	1.41921e+07	6.71195e+06	3.46484e+06	0	3.14834e+07	1.80128e+07	2.91652e+07	3.84538e+06	0	3.44958e+06	7.32027e+06	0	2.92227e+06	9.52412e+06	8.5846e+06	0	2.21105e+06	0	0	0	3.82188e+06	1.71615e+07	4.31562e+06	1.81553e+07	1.46195e+07	7.15321e+06
Q53QZ3	Rho GTPase-activating protein 15	ARHGAP15	ARHGAP15;ARHGAP9	0	0	907794	0	0	0	3.0798e+06	0	0	0	0	0	0	2.20003e+06	0	0	0	0	0	718611	0	1.85987e+06	0	698153	0	605325	1.06207e+06	0	1.65304e+06	971478	0	1.37849e+06	0	680291	0	0	0	0	1.8045e+06	856533	0	545072	0	0	0	0
Q68EM7	Rho GTPase-activating protein 17	ARHGAP17	ARHGAP17	4.60254e+07	2.99957e+07	2.86045e+07	3.2459e+07	2.76474e+07	2.81025e+07	3.78321e+07	4.22284e+07	2.56754e+07	2.83964e+07	2.42814e+07	2.82313e+07	3.47028e+07	2.82862e+07	3.85609e+07	2.74513e+07	2.8461e+07	3.27682e+07	3.22046e+07	2.97623e+07	4.50174e+07	3.24791e+07	4.60677e+07	1.86481e+07	40425323	3.95915e+07	3.53674e+07	2.95106e+07	2.71602e+07	3.00391e+07	4.37128e+07	2.50545e+07	2.42519e+07	3.70382e+07	3.96115e+07	2.96769e+07	2.70744e+07	2.15281e+07	3.20393e+07	3.62929e+07	3.36035e+07	4.22185e+07	3.83626e+07	4.07969e+07	4.57897e+07	3.20768e+07
A0A2R8YGB3	Rho GTPase-activating protein 26	ARHGAP26	ARHGAP26	0	0	0	0	0	533621	604954	0	1.73755e+06	0	0	0	0	0	0	0	0	0	0	0	0	0	0	363903	0	0	0	0	0	0	1.52253e+06	0	0	1.351e+06	0	0	0	0	0	0	0	0	0	0	0	0
A0A0G2JNY3	Rho GTPase-activating protein 27	ARHGAP27	ARHGAP27	0	5.4518e+06	4.52443e+06	8.81307e+06	8.69349e+06	7.89732e+06	1.79987e+07	7.09199e+06	7.50928e+06	7.39112e+06	4.65012e+06	8.26413e+06	2.33913e+06	2.8769e+06	5.6694e+06	6.40909e+06	5.19117e+06	3.34346e+06	0	7908296	7.31732e+06	1.02463e+07	5.03828e+06	5.38703e+06	2.36277e+06	4.6376e+06	5.12642e+06	2.88482e+06	9.05951e+06	2.55264e+06	0	3.75083e+06	4.34843e+06	0	2.80638e+06	2.93006e+06	3.42526e+06	4.27028e+06	2.08374e+07	0	2.33939e+06	0	0	0	0	0
Q7Z6I6	Rho GTPase-activating protein 30	ARHGAP30	ARHGAP30	5.85908e+06	1.80047e+07	2.30436e+07	2.54258e+07	3.30085e+07	2.14222e+07	2.16755e+07	1.87806e+07	1.25888e+07	2.03634e+07	2.36443e+07	2.8849e+07	8.6085e+06	2.74916e+07	2.02759e+07	1.50628e+07	1.16489e+07	7.09736e+06	1.33365e+07	34583536	2.03786e+07	2.547e+07	4.90095e+07	1.98762e+07	2.15265e+07	2.72488e+07	2.14666e+07	6.61794e+06	1.34092e+07	1.02592e+07	5.70274e+06	1.03834e+07	1.209e+07	4.99547e+06	8.82401e+06	9.04128e+06	9.81265e+06	2.5651e+07	7.79785e+06	7.33019e+06	8.46861e+06	7.1231e+06	5.08616e+06	1.14975e+07	4.13444e+06	7.14599e+06
A0A2X0SF93	ARHGAP31 (Fragment)	ARHGAP31	ARHGAP31	0	0	0	0	0	0	0	4.12357e+06	0	0	0	2.77599e+06	1.29288e+06	0	0	0	0	0	0	0	0	0	0	0	0	0	4.56402e+06	0	0	0	0	0	0	0	0	352365	0	0	0	0	1.26612e+06	0	3.93723e+06	0	571500	895300
A0A2X0SFV3	ARHGAP35 (Fragment)	ARHGAP35	GRLF1;ARHGAP35;THBS1	0	6.53453e+06	1.10747e+07	1.87992e+07	8.50498e+06	1.45741e+07	1.44109e+07	1.41473e+07	1.28007e+07	6.91751e+06	1.76286e+07	4.09399e+06	0	1.04685e+07	1.82322e+07	1.10238e+07	1.18178e+07	8.79092e+06	1.26404e+07	2.12389e+07	9.57518e+06	9.21122e+06	4.97335e+06	7.36264e+06	5.56418e+06	6.17433e+06	6.26445e+06	1.50268e+07	2.46271e+07	2.74796e+06	2.97511e+06	0	2.76777e+06	2.09524e+06	0	723509	3.79408e+06	6.27135e+06	2.32155e+06	0	3.64517e+06	3.08787e+06	1.31298e+06	3.00021e+06	3.8911e+06	0
A0A2X0SF61	ARHGAP4 (Fragment)	ARHGAP4	ARHGAP4;C1	2.52801e+08	4.2465e+08	2.76889e+08	4.02916e+08	4.50631e+08	2.65307e+08	5.98237e+08	3.9329e+08	3.54041e+08	3.84584e+08	3.73864e+08	393816336	316164036	3.57269e+08	3.03121e+08	4.83232e+08	3.51125e+08	4.98949e+08	3.05672e+08	2.16733e+08	3.59741e+08	4.10113e+08	1.1436e+08	3.01848e+08	1.76178e+08	2.5854e+08	2.5073e+08	3.05451e+08	9.63825e+08	4.96142e+08	2.67176e+08	3.20674e+08	3.96157e+08	1.47336e+08	1.05459e+08	3.38318e+08	4.45322e+08	3.62685e+08	7.28009e+08	4.16932e+08	2.58279e+08	2.17955e+08	1.58041e+08	1.89797e+08	2.31167e+08	3.20557e+08
Q13017	Rho GTPase-activating protein 5	ARHGAP5	ARHGAP5	1.19729e+07	3.20273e+07	1.19328e+07	1.96966e+07	0	8.23401e+06	7.63184e+06	1.25745e+07	2.67681e+07	2.65943e+07	2.16086e+07	2.23287e+07	1.98274e+07	1.62216e+07	2.707e+07	2.51278e+07	2.48431e+07	3.19658e+07	1.55633e+07	15634182	1.94331e+07	2.71529e+07	8.41387e+06	2.10572e+07	1.22697e+07	1.30452e+07	2.09467e+07	2.72283e+07	3.95746e+07	2.56567e+07	1.45061e+07	2.8769e+07	2.96397e+07	1.27535e+07	3.06941e+07	2.86056e+07	2.42175e+07	2.21057e+07	4.33139e+07	3.0271e+07	2.26085e+07	1.48637e+07	7.63025e+06	9.91207e+06	2.04349e+07	1.83465e+07
H0YI36	Rho GTPase-activating protein 9 (Fragment)	ARHGAP9	ARHGAP15;ARHGAP9	0	2.51275e+06	0	0	0	0	0	0	1.86905e+06	0	1.47407e+06	0	1.36695e+06	0	0	0	3.53394e+06	0	0	0	0	0	0	0	0	0	0	2.30781e+06	0	0	0	1.44267e+06	4.66585e+06	3.19196e+06	0	0	0	4.97515e+06	0	3.33762e+06	0	0	0	0	0	2.80881e+06
A0A024RAS5	Rho GDP dissociation inhibitor (GDI) beta, isoform CRA_a	ARHGDIB	ARHGDIB	2.92e+08	3.91772e+08	1.53281e+08	3.96967e+08	2.24544e+08	189563712	385535472	229219864	3.42357e+08	4.93077e+08	4.06899e+08	3.65865e+08	3.64077e+08	5.14549e+08	3.65875e+08	5.23549e+08	5.37487e+08	3.66671e+08	2.50976e+08	3.2182e+08	2.57951e+08	311855745	2.69028e+08	2.42758e+08	2.25571e+08	2.76516e+08	2.11965e+08	4.21326e+08	3.85098e+08	4.6613e+08	3.26231e+08	4.69408e+08	5.77336e+08	2.48525e+08	4.04255e+08	2.90235e+08	5.69932e+08	4.82635e+08	1006687298	5.11072e+08	5.02803e+08	2.26342e+08	3.40703e+08	198334149	2.06444e+08	303218860
A0A024R0R1	Rho guanine nucleotide exchange factor (GEF) 1, isoform CRA_e	ARHGEF1	FLJ00369;ARHGEF1	7.03325e+07	1.57148e+08	9.9038e+07	1.69148e+08	1.43518e+08	1.40781e+08	1.89704e+08	1.21258e+08	1.76304e+08	1.67501e+08	2.05262e+08	2.02231e+08	1.16163e+08	1.38218e+08	1.17911e+08	1.41155e+08	1.07104e+08	172496590	1.06045e+08	1.6358e+08	1.71976e+08	1.53497e+08	8.90647e+07	1.15124e+08	1.04646e+08	1.4525e+08	1.54798e+08	1.36221e+08	1.73274e+08	1.34255e+08	7.0245e+07	1.29046e+08	1.38744e+08	5.0944e+07	9.6907e+07	1.24729e+08	1.34006e+08	1.16797e+08	2.01871e+08	1.10663e+08	1.45728e+08	8.35128e+07	6.85189e+07	6.63991e+07	8.60177e+07	9.51279e+07
H0YAN8	Rho guanine nucleotide exchange factor 10 (Fragment)	ARHGEF10	ARHGEF10	0	1.13205e+06	0	1.26079e+06	499728	987001	526884	0	0	0	755206	0	0	753071	0	0	0	0	0	759370	6.42435e+06	0	0	1.53407e+06	973253	2.0667e+06	2.00525e+06	0	1.65532e+06	1.46966e+06	0	726130	725965	0	1.08773e+06	0	809301	0	940621	0	0	0	0	0	0	661055
A0A2X0SFB0	ARHGEF11 (Fragment)	ARHGEF11	ARHGEF11	0	0	0	0	0	666095	0	0	0	0	0	0	0	0	0	0	0	0	0	0	0	0	0	0	0	0	666168	0	0	0	0	530602	0	0	856693	0	0	0	0	0	0	0	0	0	0	0
A0A2X0SFF5	ARHGEF12 (Fragment)	ARHGEF12	ARHGEF12	1.54149e+08	8.36462e+07	107344002	1.29199e+08	1.22343e+08	1.2028e+08	5.43826e+07	7.48994e+07	1.27402e+08	1.20346e+08	8.80281e+07	1.2848e+08	7.91463e+07	1.17142e+08	115515331	1.48694e+08	1.12049e+08	1.09134e+08	1.11263e+08	8.68974e+07	1.17339e+08	7.96488e+07	1.09571e+08	1.04325e+08	1.46662e+08	8.37441e+07	1.12528e+08	1.25453e+08	2.07052e+08	9.27008e+07	1.03548e+08	1.62985e+08	2.17871e+08	1.06144e+08	1.28081e+08	1.21695e+08	8.37554e+07	8.04144e+07	166937859	1.10422e+08	113370130	1.1149e+08	100947383	1.2466e+08	8.23341e+07	7.84299e+07
O94989	Rho guanine nucleotide exchange factor 15	ARHGEF15	ARHGEF15	0	0	625422	0	0	0	0	0	0	0	648707	1.05337e+06	0	0	673407	0	0	0	0	665313	4.98882e+06	1.79175e+06	0	0	4.09526e+06	0	513177	0	0	0	0	0	0	0	0	0	0	0	0	0	0	0	1.15232e+07	1.6376e+06	7.67455e+06	0
B0QZD3	Rho guanine nucleotide exchange factor 16 (Fragment)	ARHGEF16	ARHGEF16	0	0	0	0	0	0	1.79556e+06	0	0	0	0	0	0	1.62716e+06	0	0	0	0	0	0	0	1.35897e+06	0	1.05264e+06	2.43619e+06	1.02574e+06	0	0	0	0	0	449362	0	0	0	852400	0	0	1.40071e+06	0	1.33871e+06	0	0	0	689143	1.57385e+06
Q96PE2	Rho guanine nucleotide exchange factor 17	ARHGEF17	RAB43;ARHGEF17	1.28215e+07	6.71356e+06	6.07981e+06	5.75211e+06	5.09137e+06	4.49594e+06	329142	3.08415e+06	5.81019e+06	1.10521e+07	7.15345e+06	3.76461e+06	7.45836e+06	9.59376e+06	1.17154e+07	1.4933e+07	6.54034e+06	1.14902e+07	7.55718e+06	707000	2.84504e+06	0	0	5.94108e+06	8.33127e+06	4.25028e+06	8.809e+06	9.80367e+06	6.26506e+06	6.73346e+06	1.18396e+07	5.84968e+06	1.06119e+07	6.74705e+06	8.09374e+06	1.15554e+07	7.73949e+06	4.5583e+06	4.82007e+06	8.51853e+06	9.2562e+06	6.47219e+06	4.22708e+06	7.88666e+06	0	7.09659e+06
A0A087WZG4	Rho guanine nucleotide exchange factor 18	ARHGEF18	ARHGEF18;hCG_22253	0	1.79347e+06	2.72672e+06	3.61236e+06	0	0	586799	541047	1.02017e+06	616428	544367	0	3.64862e+06	0	839229	1.97756e+06	767552	2.05452e+06	4.56497e+06	1737443	4.75504e+06	663092	4.94092e+06	2.61015e+06	4.67527e+06	0	4.4877e+06	1.82073e+06	6.63403e+06	3.1458e+06	2.44158e+06	1.72286e+06	1.22488e+06	0	2.18282e+06	2.763e+06	0	1.99314e+06	2.16445e+06	4.03415e+06	1.87368e+06	2.55824e+06	7.44193e+06	1.39606e+06	0	1.9626e+06
V9GYM8	Guanine nucleotide exchange factor H1	ARHGEF2	ARHGEF2	3.38933e+07	6.53225e+07	5.27982e+07	1.04759e+08	6.69865e+07	5.79667e+07	9.66266e+07	8.31429e+07	6.97149e+07	8.49129e+07	5.91411e+07	5.59272e+07	4.05078e+07	6.60514e+07	5.80463e+07	8.55378e+07	7.40214e+07	9.78931e+07	6.1208e+07	7.45714e+07	8.10506e+07	7.39096e+07	47854105	1.04116e+08	7.33551e+07	8.97227e+07	9.52528e+07	6.22656e+07	1.26633e+08	8.3184e+07	7.023e+07	8.7498e+07	1.03136e+08	4.94894e+07	4.33106e+07	4.5474e+07	7.27176e+07	8.05274e+07	1.63317e+08	4.95702e+07	6.26131e+07	4.78904e+07	4.53935e+07	3.86714e+07	6.1548e+07	40679466
A0A2X0SFG4	ARHGEF40 (Fragment)	ARHGEF40	FLJ10357;ARHGEF40	1.88982e+07	1.60401e+07	1.05501e+07	1.74684e+07	2.23918e+07	1.29938e+07	3.37532e+07	2.89275e+07	1.86587e+07	1.54206e+07	3.43478e+07	1.85828e+07	1.32788e+07	2.15228e+07	3.01372e+07	4.28871e+07	1.72074e+07	4.45029e+06	1.72299e+07	5.24742e+07	4.94495e+07	5.16552e+07	3.74631e+07	6.82358e+06	1.55351e+07	2.36597e+07	1.40672e+07	11868368	4.12148e+07	1.58611e+07	2.20898e+06	1.84784e+07	2.42333e+07	4.47962e+06	1.31487e+07	1.85829e+07	1.14202e+07	3.58582e+06	5.16918e+07	2.49585e+07	2.90064e+07	1.56819e+07	1.92829e+07	9.73375e+06	1.25723e+07	1.78952e+07
Q15052	Rho guanine nucleotide exchange factor 6	ARHGEF6	ARHGEF6;ARHGEF7;KIAA0142	3.00793e+06	7.78459e+06	1.20215e+07	8.44006e+06	1.54437e+07	5.70839e+06	1.41846e+07	6.53886e+06	6.65516e+06	8.5522e+06	8.57469e+06	6.19878e+06	8.21704e+06	8.53598e+06	6.88803e+06	7.57947e+06	4.14699e+06	4.77423e+06	7.82266e+06	1.40307e+07	1.29378e+07	1.17761e+07	4.28729e+06	8.90634e+06	1.36815e+07	1.4138e+07	1.58465e+07	4.40737e+06	1.32701e+07	1.06532e+07	1.35609e+06	5.78583e+06	2.55485e+06	1.13587e+07	1.53423e+07	1.89834e+06	7.82565e+06	5.5134e+06	6.5147e+06	2.69907e+06	2.63249e+06	2.46484e+06	7.95864e+06	1.1628e+07	890149	1.43157e+06
A0A0S2Q0B1	AT-rich interactive domain-containing protein 1A	ARID1A	ARID1B;ARID1A	447638	2.62398e+06	6.11331e+06	3.6683e+06	1.18802e+06	4.06356e+06	3.79812e+06	1.43686e+07	968514	5.88177e+06	0	2.91737e+06	2.87561e+06	2.90144e+06	5.35639e+06	1.13262e+08	0	7.66099e+06	2.90939e+06	4.15759e+06	9.58955e+06	9.53214e+06	1.97553e+06	2.19349e+07	7.57851e+06	7.62056e+06	7.38515e+06	2.33196e+06	7.73819e+06	4.48441e+06	4.0386e+06	6.0404e+06	4.91338e+06	3.58306e+06	2.16504e+06	2.81562e+06	2.31132e+06	2.57744e+06	3.38995e+06	3.59746e+06	1.42915e+06	3.72953e+06	5.79972e+06	8.33847e+06	3.48792e+06	3.44435e+06
A0A3F2YNW7	AT-rich interactive domain-containing protein 1B	ARID1B	ARID1B;ARID1A	2.7303e+06	0	0	0	0	0	0	1.28959e+06	3.65362e+06	1.87251e+06	0	1.04864e+06	3.80257e+06	2.02109e+06	1.93025e+06	0	6.05157e+06	6.42675e+06	6.29522e+06	3.12643e+06	2.95884e+06	0	2.01154e+06	789395	1.10836e+06	1.52499e+06	0	5.70966e+06	3.68281e+06	5.79763e+06	8.55231e+06	2.34301e+06	4.69658e+06	7.86527e+06	4.67987e+06	4.67746e+06	0	1.70029e+06	2.76159e+06	4.31257e+06	0	1.55912e+06	1.00205e+06	0	1.89459e+06	5.26794e+06
Q4LE39	AT-rich interactive domain-containing protein 4B	ARID4B	ARID4B	0	3.84838e+06	3.44031e+06	5.48842e+06	5.69535e+06	3.84405e+06	6.97636e+06	7.60172e+06	4.66827e+06	2.51031e+06	7.91888e+06	1.71642e+06	1.37359e+07	6.29142e+06	1.35318e+06	4.32899e+06	2.32258e+06	4.36879e+06	3.03034e+06	1.45131e+06	4.25353e+06	2.76039e+06	983532	1.31847e+06	0	4.9231e+06	4.08959e+06	2.69966e+06	973653	3.09629e+06	5.52715e+06	1.47812e+06	2.92727e+06	4.15442e+06	7.70082e+06	4.97128e+06	2.33519e+06	4.51251e+06	524046	6.50458e+06	4.70106e+06	1.07894e+06	4.36738e+06	3.42282e+06	2.28593e+06	4.25038e+06
Q9Y4X5	E3 ubiquitin-protein ligase ARIH1	ARIH1	ARIH1	3.08491e+06	5.60362e+06	8.9545e+06	7.45446e+06	1.0782e+07	2.04625e+07	1.40429e+07	1.6977e+07	1.56114e+07	1.57115e+07	1.51915e+07	1.8704e+07	1.74108e+06	1.36943e+07	6.72888e+06	1.21385e+07	1.35091e+07	1.79011e+07	7.39145e+06	1.06158e+07	1.15487e+06	1.69505e+07	8.89843e+06	1.96965e+07	3.31246e+06	7.60386e+06	1.14396e+07	1.38477e+07	8.00473e+06	4.278e+06	1.0002e+07	6.65148e+06	1.86463e+06	7.44601e+06	2.90077e+06	5.56004e+06	8.44686e+06	7.42481e+06	1.54115e+07	2.41076e+06	1.09726e+07	1.65812e+06	0	3.4927e+06	567972	7.50892e+06
F8VYN9	ADP-ribosylation factor-like protein 1	ARL1	ARL1	5.92872e+07	5.19841e+07	2.81513e+07	4.53391e+07	4.61164e+07	4.23719e+07	1.10047e+08	5.2208e+07	5.26159e+07	7.44102e+07	7.41103e+07	6.78428e+07	6.2948e+07	5.12163e+07	106696397	8.57713e+07	4.27129e+07	4.81374e+07	5.99079e+07	8.54107e+07	8.55557e+07	8.27883e+07	6.85128e+07	6.04015e+07	4.87617e+07	5.08808e+07	4.83845e+07	7.31764e+07	9.05819e+07	7.62101e+07	4.83103e+07	7.86985e+07	8.51657e+07	4.58029e+07	4.71794e+07	6.66035e+07	9.71596e+07	6.54036e+07	1.38689e+08	6.53421e+07	7.99865e+07	5.34675e+07	4.0689e+07	4.62921e+07	5.48803e+07	4.95575e+07
Q9Y2Y0	ADP-ribosylation factor-like protein 2-binding protein	ARL2BP	ARL2BP	1.61166e+06	5.29786e+06	7.09346e+06	7.04705e+06	1.09628e+07	7.6958e+06	8.57057e+06	5.48534e+06	9.454e+06	5.60396e+06	5.99958e+06	5.75145e+06	2.20152e+06	9.27861e+06	5.97232e+06	7.91586e+06	4.46029e+06	5.19825e+06	8.88445e+06	8816507	8.70137e+06	7.19014e+06	5.66353e+06	5.93567e+06	7.06858e+06	7.75524e+06	9.14105e+06	4.14433e+06	9.09538e+06	3.22042e+06	2.57198e+06	5.52741e+06	7.51558e+06	2.03742e+06	4.77664e+06	4.97406e+06	4.31387e+06	4.44652e+06	6.11833e+06	4.80917e+06	4.68105e+06	3.72178e+06	2.89293e+06	4.47755e+06	4.12379e+06	3.16077e+06
P36405	ADP-ribosylation factor-like protein 3	ARL3	ARL3	3.33493e+06	3.85951e+07	1.46896e+07	3.48743e+07	9.36251e+06	1.75104e+07	3.38932e+07	2.02537e+07	4.71532e+07	3.85998e+07	3.62158e+07	6.14951e+07	2.554e+07	1.78601e+07	5.56925e+07	6.27009e+07	3.43202e+07	5.38571e+07	4.3515e+07	6.27218e+07	5.13013e+07	6.26245e+07	4.42354e+07	3.63508e+07	2.00299e+07	1.58248e+07	2.2363e+07	2.55928e+07	9.24042e+07	5.17209e+07	3.00801e+07	4.30434e+07	3.78982e+07	1.08395e+07	2.77124e+07	3.05825e+07	3.62331e+07	5.50678e+07	1.48499e+08	3.61894e+07	3.47547e+07	2.72238e+07	1.67132e+07	1.56324e+07	2.78464e+07	3.24842e+07
Q9H0F7	ADP-ribosylation factor-like protein 6	ARL6	ARL6	2.99306e+06	1.73416e+07	0	1.22913e+07	6.67743e+06	6.5917e+06	1.65978e+07	4.5476e+06	5.43067e+06	1.85534e+07	1.0235e+07	0	6.89125e+06	7.43737e+06	1.26296e+06	1.00135e+07	5.73974e+06	1.09665e+07	5.2334e+06	6082222	1.00837e+07	1.40291e+07	1.91794e+06	1.08561e+07	3.90989e+06	6.37097e+06	8.89498e+06	1.0669e+07	1.70358e+07	8.94436e+06	4.52849e+06	1.0745e+07	1.02544e+07	3.09979e+06	8.45005e+06	0	1.03485e+07	1.08471e+07	3.01919e+07	9.66999e+06	1.36065e+07	3.44066e+06	5.93204e+06	2.65885e+06	3.16204e+06	6.55454e+06
F8WCT1	ADP-ribosylation factor-like protein 6-interacting protein 4	ARL6IP4	ARL6IP4;FLJ00169	0	1.0577e+07	0	6.86293e+06	2.30904e+06	4.69302e+06	7.97652e+06	0	0	7.74335e+06	8.50683e+06	0	8.134e+06	8.80851e+06	0	9.39202e+06	0	0	1.47929e+07	7225929	8.31398e+06	7.96893e+06	0	1.66209e+07	0	0	1.43338e+07	7.73401e+06	5.31208e+06	1.19217e+07	9.78296e+06	1.47698e+07	1.05379e+07	0	0	0	1.62272e+07	2.34381e+07	1.1831e+07	8.52872e+06	1.04339e+07	1.62349e+07	0	2.10895e+07	1.04449e+07	0
Q8N6S5	ADP-ribosylation factor-like protein 6-interacting protein 6	ARL6IP6	ARL6IP6	0	0	2.05712e+06	2.42565e+06	2.32633e+06	2.49108e+06	3.24721e+06	3.05842e+06	1.8658e+06	1.20847e+06	0	0	2.26539e+06	1.61709e+06	1.91594e+06	1.88151e+06	1.57815e+06	3.42693e+06	1.89509e+06	1.94034e+06	2.78695e+06	2.17489e+06	0	0	1.40248e+06	2.33016e+06	2.45504e+06	0	0	0	2.79414e+06	2.46111e+06	4.34975e+06	0	2.06662e+06	0	2.94235e+06	0	0	0	2.84589e+06	0	0	0	0	0
A0A024R977	ADP-ribosylation factor-like 8A, isoform CRA_a	ARL8A	ARL8B;ARL8A	0	2.01563e+06	1.94147e+06	4.44009e+06	2.91334e+06	2.54059e+06	1.42209e+06	8.49879e+06	3.00152e+06	9.72353e+06	6.85618e+06	2.55495e+06	1.27554e+07	4.67577e+06	1.03353e+06	7.28885e+06	1.10371e+06	5.13301e+06	1.96992e+06	6.34154e+06	6.5573e+06	6.07909e+06	3.39278e+06	3.85223e+06	3.32172e+06	1.01247e+07	8.01605e+06	8.34453e+06	7.72309e+06	3.65341e+06	0	2.38342e+07	1.99615e+07	2.90202e+06	1.84924e+07	1.8951e+07	2.1891e+07	3.33368e+07	1.64789e+07	1.47473e+07	3.12416e+07	2.32394e+07	1.02918e+06	2.39681e+07	2.0324e+07	1.98224e+07
Q9NVT9	Armadillo repeat-containing protein 1	ARMC1	ARMC1	1.51042e+07	2.02518e+07	2.78802e+07	3.1665e+07	4.24569e+07	3.07865e+07	3.08346e+07	2.65193e+07	2.4702e+07	3.63067e+07	2.85704e+07	2.29293e+07	1.73148e+07	2.40976e+07	3.40078e+07	4.19204e+07	1.95908e+07	3.30937e+07	1.83528e+07	3.61665e+07	2.47247e+07	4.16702e+07	3.43578e+07	3.0359e+07	1.64266e+07	2.68094e+07	2.89538e+07	1.98517e+07	3.39684e+07	2.36323e+07	1.35012e+07	2.91147e+07	2.99434e+07	1.08546e+07	2.17871e+07	2.1272e+07	2.33997e+07	2.31943e+07	4.22356e+07	2.54892e+07	2.00861e+06	0	1.00569e+07	9.37944e+06	0	1.34963e+07
Q8N2F6	Armadillo repeat-containing protein 10	ARMC10	ARMC10	0	1.08862e+07	3.02274e+07	1.78485e+07	7.77346e+06	1.13614e+07	1.78879e+07	5.30471e+06	5.20099e+06	1.21767e+07	8.2618e+06	2.31032e+07	3.47979e+07	1.174e+07	2.83885e+07	1.5593e+07	2.76877e+06	3.48819e+07	1.11891e+07	7.70136e+06	1.02142e+07	2.51013e+07	6.45038e+06	1.1233e+07	0	3.4131e+07	1.16295e+07	6.74821e+06	2.51803e+07	1.17393e+07	4.24059e+06	2.20937e+07	4.12e+07	0	1.18997e+07	0	1.02157e+07	9.20033e+06	1.47979e+07	1.82775e+07	1.66492e+07	2.09832e+06	2.63507e+06	1.02634e+06	1.1182e+07	8.46029e+06
Q6NXE6	Armadillo repeat-containing protein 6	ARMC6	ARMC6;DKFZp762A1314	802377	1.67814e+06	5.44485e+06	1.74092e+06	4.83331e+06	2.00277e+06	1.01657e+07	1.18028e+06	8.29829e+06	968765	955656	1.45995e+06	0	3.61773e+06	946183	2.39109e+06	1.63908e+06	3.69664e+06	6.35892e+06	662893	0	0	720736	0	879773	1.5481e+06	1.23553e+06	1.40535e+06	1.02799e+07	3.14156e+06	0	2.73336e+06	2.81533e+06	0	2.79603e+06	2.28366e+06	0	865348	715114	6.39632e+06	1.11892e+06	0	0	0	890471	0
Q8IUR7	Armadillo repeat-containing protein 8	ARMC8	ARMC8	0	0	0	0	0	0	0	0	0	0	1.16789e+06	0	0	0	0	892904	0	1.0375e+06	0	0	0	0	0	1.30545e+06	0	0	714265	0	1.58441e+06	0	0	0	0	0	0	0	747332	1.21318e+06	2.44835e+06	0	0	0	0	0	0	0
A0A024R486	LisH domain-containing protein ARMC9	ARMC9	ARMC9	0	1.8069e+06	0	1.56074e+06	1.36437e+06	1.1278e+06	1.43335e+06	936991	1.17118e+06	1.54945e+06	1.71138e+06	1.61378e+06	714184	956878	1.99405e+06	1.56207e+06	1.26124e+06	983312	1.01729e+06	2.19664e+06	1.84546e+06	1.96756e+06	2.37437e+06	2.11584e+06	0	827681	1.43076e+06	1.29112e+06	2.27982e+06	1.21816e+06	0	2.66079e+06	1.61788e+06	0	0	1.26243e+06	1.43597e+06	1.84698e+06	1.82946e+06	1.19915e+06	1.11753e+06	0	0	849360	0	723173
A0A024RCI6	Armadillo repeat containing, X-linked 1, isoform CRA_a	ARMCX1	ARMCX1	0	1.61098e+06	1.81975e+06	1.18845e+06	2.58296e+06	2.01666e+06	1.33953e+06	2.96563e+06	3.79035e+06	3.61566e+06	2.70003e+06	1.4842e+06	2.91148e+06	2.56834e+06	4566508	5.70383e+06	2.17787e+06	3.94565e+06	3.39711e+06	5.18051e+06	0	3.83444e+06	966693	3.29751e+06	0	1.09998e+06	901884	4.81465e+06	9.87011e+06	1.68606e+06	2.46277e+06	1.22993e+06	5.57465e+06	0	1.68544e+06	2.89173e+06	0	3.80119e+06	5.59938e+06	2.37188e+06	1.33202e+06	0	0	0	0	4.71891e+06
A0A024RCF9	Armadillo repeat containing, X-linked 3, isoform CRA_a	ARMCX3	ARMCX3	0	9.50773e+06	5.53617e+06	1.38041e+07	8.45318e+06	3.30709e+06	1.08096e+07	1.20696e+07	1.58541e+07	5.14851e+06	1.1293e+07	2.03503e+06	5.1177e+06	3.23874e+06	8.25773e+06	2.72856e+06	4.85147e+06	4.65752e+06	3.19838e+06	1.49983e+07	5.63503e+06	9.86815e+06	5.89657e+06	1.26229e+07	0	2.0944e+06	3.939e+06	5.05494e+06	2.28525e+07	1.9703e+06	2.56993e+06	1.56884e+07	1.25478e+07	2.76801e+06	3.78656e+06	7.26379e+06	2.04914e+06	1.81732e+07	2.79919e+06	2.58418e+06	1.78362e+07	2.29744e+06	890567	3.06002e+06	4.38178e+06	912255
Q5T2E6	Armadillo-like helical domain-containing protein 3	ARMH3	ARMH3;C10orf76	3.02222e+07	2.78948e+07	0	4.00245e+06	367099	0	2.19406e+06	2.69715e+06	1.19751e+07	2.22498e+07	3.00981e+07	1.81124e+07	3.1853e+07	2.89091e+07	2.3448e+07	2.16525e+07	2.24173e+07	1.01843e+07	2.84439e+07	0	0	4.23408e+06	6.2385e+06	3.65361e+07	993494	4.38303e+06	1.46816e+06	3.70964e+07	1.93619e+07	4.3762e+07	2.70696e+07	2.50053e+07	2.45364e+07	3.76367e+07	3.01045e+07	4.58199e+07	3.71867e+07	2.39371e+07	2.27407e+06	2.44826e+07	2.73567e+07	5.43e+07	6.61164e+07	4.12902e+07	2.46603e+07	6.94632e+07
Q9H993	Damage-control phosphatase ARMT1	ARMT1	ARMT1	3.80718e+06	1.8587e+07	2.25089e+07	2.90054e+07	2.97353e+07	2.59887e+07	2.63836e+07	2.03805e+07	1.86138e+07	2.08791e+07	2.20055e+07	5.33284e+06	2.04051e+07	2.82696e+07	1.19456e+07	1.96919e+07	1.71736e+07	1.58424e+07	2.23318e+07	29337854	3.20502e+07	2.29292e+07	1.89094e+07	2.15043e+07	1.39047e+07	3.02902e+07	3.30394e+07	2.128e+07	2.65406e+07	2.18091e+07	9.97655e+06	2.27497e+07	3.18237e+07	3.32535e+06	2.35011e+07	1.50806e+07	2.14371e+07	2.29915e+07	4.65903e+07	1.60909e+07	1.84553e+07	2.06603e+06	4.4178e+06	8.21394e+06	1.35768e+06	1.16457e+07
Q92747	Actin-related protein 2/3 complex subunit 1A	ARPC1A	ARPC1B;ARPC1A;HEL-S-307	6.35408e+06	2.7546e+07	1.59573e+07	1.28116e+07	1.40684e+07	2.61634e+07	2.07603e+07	4.83118e+06	3.27143e+07	7.6673e+06	1.22162e+07	1.47722e+07	9.87388e+06	4.2574e+07	4.32658e+07	2.2142e+07	1.27135e+07	3.4963e+07	2.33323e+07	1.91386e+07	1.8405e+07	48208690	2.07138e+07	1.95337e+07	1.82984e+07	1.43744e+07	2.0771e+07	3.38277e+07	3.12191e+07	2.77982e+07	0	4.3578e+07	8.77922e+06	2.43792e+07	2.66151e+07	8.32558e+06	2.23686e+07	1.22145e+07	2.0989e+07	4.05582e+07	3.86138e+07	1.08509e+07	8.62201e+06	1.67897e+07	1.25248e+07	4.86711e+06
A4D275	Actin-related protein 2/3 complex subunit	ARPC1B	ARPC1B;ARPC1A;HEL-S-307	139482428	2.50516e+08	9.45269e+07	1.39119e+08	1.79886e+08	1.02707e+08	3.31413e+08	1.56354e+08	1.94585e+08	2.25736e+08	3.56178e+08	159258036	1.99624e+08	2.2358e+08	2.50556e+08	3.53679e+08	1.42935e+08	1.90456e+08	1.3232e+08	269039770	214298092	2.7404e+08	4.21134e+07	2.48707e+08	2.95172e+07	1.51397e+08	1.45792e+08	2.97321e+08	3.36583e+08	2.87431e+08	1.16592e+08	3.177e+08	3.10309e+08	1.15265e+08	2.02987e+08	2.61515e+08	4.22189e+08	341252377	4.99351e+08	3.10861e+08	3.23694e+08	1.51661e+08	1.63446e+08	144806116	1.18652e+08	1.61132e+08
O15144	Actin-related protein 2/3 complex subunit 2	ARPC2	ARPC2	6.08775e+08	9.60456e+08	7.1821e+08	7.8225e+08	7.37591e+08	760859342	1012192938	8.36749e+08	7.51409e+08	1106072651	1544557044	9.52077e+08	1989496804	1245091843	8.75677e+08	1252988468	6.65525e+08	9.24807e+08	825473034	9.18695e+08	8.42273e+08	938837856	747446163	8.33316e+08	6.62011e+08	7.06693e+08	6.5927e+08	1127155023	7.74808e+08	1123556132	1382889128	9.34899e+08	1224750998	9.7534e+08	1213680222	1432472235	1894281428	1451655859	8.80299e+08	1642504136	1497084215	7.93501e+08	1594818810	1165938267	7.97794e+08	1406406433
O15145	Actin-related protein 2/3 complex subunit 3	ARPC3	ARPC3	7.41793e+07	1.39366e+08	7.49815e+07	1.17725e+08	1.11e+08	9.58591e+07	1.7412e+08	1.03808e+08	1.33138e+08	1.42537e+08	1.7778e+08	173750114	1.38855e+08	1.45845e+08	1.52478e+08	1.98197e+08	9.25301e+07	1.09471e+08	9.39905e+07	2.22252e+08	1.23494e+08	1.51628e+08	1.22654e+08	1.33665e+08	7.39313e+07	1.03478e+08	1.25446e+08	1.65851e+08	1.76081e+08	1.53486e+08	1.01575e+08	1.93674e+08	1.64632e+08	114251098	1.42839e+08	134239174	224042528	1.78313e+08	2.29987e+08	1.69786e+08	1.89728e+08	9.46539e+07	9.38547e+07	7.16075e+07	1.06163e+08	1.06022e+08
P59998	Actin-related protein 2/3 complex subunit 4	ARPC4	ARPC4-TTLL3;ARPC4	103465972	1.65472e+08	7.37556e+07	1.15185e+08	1.23813e+08	8.82808e+07	1.9399e+08	1.33565e+08	137620449	1.57893e+08	1.84236e+08	1.4946e+08	1.45076e+08	1.40158e+08	1.9788e+08	2.04589e+08	1.13031e+08	1.72916e+08	1.18388e+08	2.15244e+08	196526897	2.16456e+08	8.79403e+07	1.41741e+08	9.73399e+07	1.47819e+08	1.32599e+08	1.91541e+08	2.07221e+08	1.91389e+08	1.28239e+08	2.34201e+08	2.06902e+08	9.35028e+07	1.54815e+08	1.74953e+08	2.44396e+08	2.04507e+08	3.11766e+08	1.94344e+08	2.00734e+08	1.38252e+08	1.2327e+08	1.07931e+08	1.45123e+08	1.16927e+08
O15511	Actin-related protein 2/3 complex subunit 5	ARPC5	ARPC5L;ARPC5	4.91446e+07	9.64535e+07	6.37596e+07	1.01376e+08	1.06424e+08	7.2171e+07	1.53133e+08	8.80487e+07	8.37228e+07	1.50902e+08	1.53101e+08	1.46095e+08	6.4027e+07	1.16479e+08	1.52638e+08	1.61528e+08	6.30568e+07	9.75663e+07	8.13867e+07	1.19304e+08	9.66974e+07	1.13203e+08	1.15573e+08	7.67812e+07	6.74619e+07	7.71312e+07	9.3065e+07	1.04281e+08	1.29569e+08	9.46938e+07	4.20437e+07	1.25751e+08	1.20476e+08	4.19131e+07	6.07633e+07	7.96642e+07	1.43304e+08	1.13843e+08	1.68618e+08	1.02314e+08	1.18397e+08	4.76245e+07	5.99636e+07	5.33346e+07	4.75222e+07	5.18644e+07
A0A024R897	Actin-related protein 2/3 complex subunit 5	ARPC5L	ARPC5L;ARPC5	4.71067e+07	1.27607e+08	1.03439e+08	9.40545e+07	9.80008e+07	7.67253e+07	1.09066e+08	1.10929e+08	8.2979e+07	9.71466e+07	9.68124e+07	8.8542e+07	1.42481e+08	1.17662e+08	9.64487e+07	1.12116e+08	6.26705e+07	9.98494e+07	109834906	78438425	9.20624e+07	110147226	5.04093e+07	7.2393e+07	6.54816e+07	8.64999e+07	1.07358e+08	7.81554e+07	7.49768e+07	9.87672e+07	5.98676e+07	1.17962e+08	1.13311e+08	6.71628e+07	7.57243e+07	1.17446e+08	7.76867e+07	1.21384e+08	1.06204e+08	9.77336e+07	9.14417e+07	5.73715e+07	3.76481e+07	6.98704e+07	3.83455e+07	7.78013e+07
P56211	cAMP-regulated phosphoprotein 19	ARPP19	ARPP19;ENSA	1.2352e+06	4.43647e+06	0	0	0	0	0	0	0	0	1.38241e+06	3.64416e+06	0	1.23233e+06	1.83043e+06	2.4076e+06	0	0	0	0	0	3.60904e+06	0	9.04735e+06	0	0	0	3.22409e+06	5.27686e+06	3.38182e+06	1.29786e+06	0	6.7874e+06	0	0	0	1.11975e+07	6.73348e+06	1.08267e+07	4.27792e+06	1.41835e+06	0	0	0	0	0
P49407	Beta-arrestin-1	ARRB1	SAG;ARR3;ARRB2;ARRB1	2.87765e+07	3.20933e+07	3.49784e+07	4.22283e+07	2.54409e+07	3.33822e+07	2.9262e+07	2.10532e+07	6.53623e+07	1.96806e+07	3.77846e+07	2.4244e+07	3.83135e+07	2.75553e+07	2.27159e+07	3.44474e+07	6.69161e+07	2.58766e+07	4.41641e+07	1.61013e+07	3.4361e+07	1.87801e+07	1.85511e+06	2.06245e+07	2.67267e+07	2.55832e+07	3.26503e+07	4.84806e+07	4.34971e+07	4.09671e+07	3.35454e+07	2.52675e+07	1.66506e+07	2.23895e+07	5.43688e+07	2.36535e+07	2.50473e+07	11523051	3.1337e+07	2.62986e+07	2.90999e+07	1.98997e+07	1.43658e+07	3.47515e+07	1.38242e+07	3.80794e+07
H0YET9	Beta-arrestin-1 (Fragment)	ARRB1	ARR3;ARRB1	0	0	0	0	0	0	479519	0	0	0	0	0	0	0	0	0	0	0	0	0	0	584741	0	0	0	0	745988	0	0	0	0	0	0	0	481757	0	0	356725	0	0	0	386933	0	567085	0	0
P32121	Beta-arrestin-2	ARRB2	ARRB2;ARRB1	0	2.9473e+06	0	2.91845e+06	2.80416e+06	1.26487e+06	2.87865e+06	0	2.242e+06	697214	3.17311e+06	603111	639108	1.5994e+06	0	1.64597e+06	0	0	0	2596566	2.04294e+06	4.51396e+06	0	0	0	1.24826e+06	1.92423e+06	828476	9.0117e+06	0	0	0	2.01984e+06	0	810112	2.13785e+06	3.61671e+06	2.63856e+06	8.27161e+06	1.0637e+06	1.54308e+06	2.09662e+06	1.0022e+06	5.45199e+06	2.25918e+06	0
Q5T371	Arrestin domain-containing protein 1 (Fragment)	ARRDC1	ARRDC1	3.83069e+06	7.22155e+06	6.0709e+06	6.06687e+06	9.17814e+06	7.06537e+06	9.87529e+06	1.10534e+07	5.58035e+06	6.36432e+06	7.40897e+06	4.19474e+06	4.86408e+06	7.36636e+06	7.98927e+06	7.41079e+06	5.05531e+06	8.7895e+06	4.86193e+06	9.48443e+06	8.56549e+06	7.74219e+06	1.40847e+06	6.18415e+06	3.95013e+06	6.62087e+06	8.63744e+06	7.24723e+06	7.49665e+06	4.1877e+06	5.14162e+06	7.57232e+06	8.22437e+06	3.26634e+06	8.30004e+06	4.62245e+06	5.58787e+06	5.78788e+06	6.89197e+06	5.05295e+06	6.41946e+06	2.97011e+06	3.1252e+06	4.88387e+06	2.4432e+06	3.35601e+06
A0A024R509	Arylsulfatase A, isoform CRA_a	ARSA	FLJ00319;GALNS;ARSA;DKFZp686G12235	1.7257e+06	4.08282e+07	1.03309e+07	8.90576e+06	3.3578e+07	1.22875e+07	6.49054e+06	1.59843e+07	4.11752e+06	1.99012e+07	2.27609e+07	6.93694e+06	1.63426e+07	5.15735e+06	8.99766e+06	5.70544e+06	5.4027e+06	2.11749e+07	1.24044e+07	1.9872e+07	1.03245e+07	1.26698e+07	2.39212e+07	2.34998e+07	2.81474e+06	5.27486e+06	6.13852e+06	2.42791e+07	2.53275e+07	2.99468e+07	1.11889e+07	8.51627e+06	2.84848e+07	5.46497e+06	2.62256e+07	3.33231e+07	1.32593e+07	1.33567e+07	8.06062e+06	2.22501e+07	3.408e+07	1.01894e+07	1.02905e+07	4.45544e+06	1.02961e+07	1.58385e+07
P15848	Arylsulfatase B	ARSB	ARSB	0	9.50263e+06	0	0	0	415916	716898	549602	0	675040	640843	0	1.2906e+06	0	0	0	2.54212e+06	0	3.46224e+06	762854	0	1.41733e+06	0	6.66262e+06	640807	0	0	2.67664e+06	9.03074e+06	0	0	2.17007e+06	2.8185e+06	0	0	3.40056e+06	1.27681e+06	901261	0	1.04646e+06	2.16544e+06	0	969714	0	2.64839e+06	0
A0A024RAR8	Aminopeptidase	ARTS-1	ERAP1;ARTS-1	1.96299e+07	1.79295e+07	1.81936e+07	5.04278e+07	3.81029e+07	3.19129e+07	3.26351e+07	2.68881e+07	2.67565e+07	5.25055e+07	4.76426e+07	3.77733e+07	2.3618e+07	3.87908e+07	3.71366e+07	4.67801e+07	3.62883e+07	4.24542e+07	3.40974e+07	2.56207e+07	2.23199e+07	1.87599e+07	2.24859e+07	4.15286e+07	1.95434e+07	3.58769e+07	3.70706e+07	3.88043e+07	1.67778e+07	2.81139e+07	2.32188e+07	2.96722e+07	3.38059e+07	1.50888e+07	3.34381e+07	2.14778e+07	4.3967e+07	2.70233e+07	3.87307e+07	3.57833e+07	4.58836e+07	1.98389e+07	1.12085e+07	2.11731e+07	1.10124e+07	2.01326e+07
C9JJX6	Armadillo repeat protein deleted in velo-cardio-facial syndrome	ARVCF	ARVCF	7.64194e+06	8.76865e+06	3.80116e+07	3.57834e+07	4.14281e+07	3.77334e+07	2.48512e+07	2.56327e+07	1.03321e+07	1.2598e+07	1.85053e+07	8.16379e+06	7.26031e+06	1.94416e+07	1.5124e+07	1.57388e+07	1.5092e+07	1.27684e+07	1.34614e+07	1.30247e+07	2.2721e+07	1.73051e+07	1.92496e+06	8.02675e+06	2.81919e+07	2.58905e+07	4.87428e+07	6.06205e+06	1.18397e+07	1.32543e+07	6.40917e+06	1.0589e+07	6.63114e+06	3.81888e+06	1.54421e+07	1.04076e+07	6.99174e+06	4.59007e+06	1.12446e+07	5.07783e+06	2.63547e+06	1.60076e+07	5.70352e+06	2.63808e+07	8.67346e+06	4.50971e+06
A0A1B0GW68	Ceramidase	ASAH1	ASAH1	1.2117e+07	3.40948e+07	3.35963e+07	5.85717e+07	4.53878e+07	4.08908e+07	6.10909e+07	4.52576e+07	2.91352e+07	3.14418e+07	4.39592e+07	4.68495e+07	1.48515e+07	2.92427e+07	1.8455e+07	2.69166e+07	2.52876e+07	3.14391e+07	2.24255e+07	4.9347e+07	4.03137e+07	3.20993e+07	2.41972e+07	5.51648e+07	3.49082e+07	7.04312e+07	5.12698e+07	32898935	5.62183e+07	3.04095e+07	2.46511e+07	4.27054e+07	2.9985e+07	1.96616e+07	3.09894e+07	2.57014e+07	4.83616e+07	2.00282e+07	5.30598e+07	3.38393e+07	3.28296e+07	4.10848e+07	1.29176e+07	4.63601e+07	3.68276e+07	1.98126e+07
D3DSQ1	N-acylsphingosine amidohydrolase (Acid ceramidase) 1, isoform CRA_c	ASAH1	ASAH1	3.41938e+07	2.37663e+07	2.06083e+07	4.56564e+07	1.67995e+07	2.34197e+07	3.75536e+07	3.00109e+07	2.4212e+07	5.02317e+07	3.2491e+07	1.84753e+07	2.21792e+07	2.92676e+07	3.45364e+07	4.7668e+07	3.0798e+07	3.17302e+07	2.09248e+07	6.78212e+07	6.42997e+07	6.48964e+07	3.95069e+07	1.38798e+07	4.21086e+07	4.5845e+07	4.64652e+07	3.12094e+07	4.92907e+07	2.73792e+07	2.1264e+07	1.88235e+07	2.8432e+07	2.27774e+07	2.09209e+07	2.01435e+07	2.73029e+07	2.94471e+07	4.58235e+07	3.01417e+07	4.80252e+07	4.99922e+07	6.4425e+07	3.92183e+07	4.21744e+07	2.44324e+07
Q9ULH1	Arf-GAP with SH3 domain, ANK repeat and PH domain-containing protein 1	ASAP1	DDEF2;ASAP1;ASAP2	0	8.36345e+06	1.56775e+07	3.73962e+07	7.52439e+07	1.13111e+07	2.64684e+07	1.5914e+07	1.60641e+07	2.70643e+07	1.44696e+07	1.03385e+07	2.95267e+07	1.47981e+07	1.45842e+07	1.72728e+07	2.30752e+07	1.2354e+07	5.98035e+06	5038784	1.43093e+07	2.60741e+07	9.81985e+06	2.43599e+07	5.18887e+06	3.88557e+07	2.60447e+07	3.38015e+07	1.46249e+07	2.09704e+07	2.01573e+07	5.84059e+07	1.32499e+08	6.98923e+06	4.87085e+07	9.24871e+06	6.0912e+06	2.49233e+07	1.22716e+07	1.83672e+07	4.71038e+07	1.32992e+07	2.53557e+06	7.11803e+06	2.97374e+07	6.12349e+06
O43150	Arf-GAP with SH3 domain, ANK repeat and PH domain-containing protein 2	ASAP2	DDEF2;ASAP1;ASAP2	2.98414e+06	0	827859	1.76242e+06	3.54785e+06	0	3.52196e+06	716867	0	0	756993	3.44737e+06	2.74011e+06	0	0	0	1.7633e+06	2.4698e+06	2.5812e+06	2.83404e+06	3.39211e+06	7.46068e+06	0	2.27371e+06	0	3.40494e+06	4.21226e+06	0	0	0	3.41936e+06	0	0	0	0	0	0	0	0	0	0	0	1.42371e+06	1.49736e+06	2.22049e+06	0
Q96DX5	Ankyrin repeat and SOCS box protein 9	ASB9	ASB9	777796	1.91701e+06	1.47291e+06	2.43207e+06	1.1588e+06	1.86054e+06	2.16071e+06	2.15324e+06	1.93783e+06	3.1676e+06	2.25902e+06	2.13551e+06	1.01789e+06	2.74577e+06	2.20795e+06	2.36546e+06	1.52904e+06	2.4456e+06	1.81143e+06	3.1232e+06	3.00265e+06	3.3378e+06	3.71774e+06	2.08022e+06	1.81964e+06	2.11694e+06	2.01521e+06	1.46279e+06	2.58054e+06	1.57356e+06	1.04604e+06	2.1531e+06	1.72791e+06	668591	1.53981e+06	1.3504e+06	1.69668e+06	1.87403e+06	2.58439e+06	1.71939e+06	1.27928e+06	788018	1.61228e+06	911386	578709	1.0022e+06
A0A024QZM0	Activating signal cointegrator 1 complex subunit 1, isoform CRA_a	ASCC1	ASCC1	0	3.11633e+06	5.66112e+06	3.27537e+06	1.84147e+06	1.81177e+06	1.96896e+06	1.10424e+06	0	5.14271e+06	2.4166e+06	2.32579e+06	0	1.36011e+06	1.81113e+06	2.54287e+06	520354	0	0	4.30869e+06	1.71986e+06	3.54936e+06	1.9281e+06	1.00828e+07	628951	2.76116e+06	2.25276e+06	952248	6.31121e+06	801373	0	3.7077e+06	2.41408e+06	1.71906e+06	0	617833	1.44559e+06	0	2.63906e+06	0	1.07444e+06	3.22652e+06	481696	0	4.33289e+06	0
Q9H1I8	Activating signal cointegrator 1 complex subunit 2	ASCC2	ASCC2;DKFZp586O0223	0	1.12614e+06	0	0	1.40928e+06	2.01666e+06	1.33953e+06	1.07116e+06	0	1.8554e+06	0	0	0	2.56834e+06	0	0	0	1.75835e+06	0	0	0	0	966693	1.5204e+06	0	0	0	844440	1.46304e+06	0	2.46277e+06	0	0	0	0	0	0	0	0	0	1.33202e+06	0	1.62073e+06	5.83426e+06	3.74421e+06	0
Q8N3C0	Activating signal cointegrator 1 complex subunit 3	ASCC3	ASCC3	2.34121e+07	4.62262e+07	1.64067e+07	2.48816e+07	2.58401e+07	2.72653e+07	1.90142e+07	3.29068e+07	2.24658e+07	2.89531e+07	3.95166e+07	1.27728e+07	7.01791e+07	2.93391e+07	2.73395e+07	3.96441e+07	1.59474e+07	3.72165e+07	2.72266e+07	2.8141e+07	24065202	3.36316e+07	1.73366e+07	4.1991e+07	1.88747e+07	2.4064e+07	2.7284e+07	3.49919e+07	3.64833e+07	4.15198e+07	6.60721e+07	3.127e+07	7.2778e+07	4.89341e+07	6.5065e+07	6.52774e+07	119841223	6.18095e+07	3.67127e+07	7.93503e+07	1.11161e+08	2.62721e+07	5.29697e+07	3.7112e+07	4.80561e+07	4.51243e+07
L0R819	ASNSD1 upstream open reading frame protein	ASDURF	ASDURF	0	1.2589e+06	446502	0	0	0	0	0	0	3.26972e+06	2.97492e+06	0	0	0	0	0	0	2.59775e+06	0	0	0	0	0	0	0	0	0	3.98607e+06	930793	0	0	0	3.79926e+06	0	0	2.74337e+06	2.46196e+06	0	0	2.0685e+06	0	0	0	0	0	0
Q9Y294	Histone chaperone ASF1A	ASF1A	ASF1A	0	0	0	3.26431e+06	0	1.2519e+06	4.67515e+06	1.40415e+06	0	7.76425e+06	3.88463e+06	1.81344e+06	0	1.21018e+06	0	2.98783e+06	0	4.79886e+06	1.67658e+06	4.3957e+06	0	3.62647e+06	2.6297e+06	2.65145e+06	0	2.2413e+06	2.29975e+06	6.65825e+06	1.31933e+07	8.91313e+06	1.24766e+07	0	0	5.90809e+06	0	0	3.03861e+06	1.02127e+07	1.62207e+07	2.01135e+06	0	0	0	0	0	4.40712e+06
Q9NR48	Histone-lysine N-methyltransferase ASH1L	ASH1L	ASH1L	0	5.18685e+06	0	4.16738e+06	0	0	1.36544e+06	2.32288e+06	0	495714	0	502974	1.72524e+06	0	0	1.62395e+06	0	3.61281e+06	0	0	2.59359e+06	4.60709e+06	6.36402e+06	4.62502e+06	0	1.33721e+06	0	0	5.54972e+06	0	0	4.30513e+06	617318	0	3.25544e+06	420732	686130	1.00018e+07	1.62793e+06	0	1.03525e+06	9.95494e+06	4.41714e+06	7.77049e+06	3.55986e+06	0
Q9UBL3	Set1/Ash2 histone methyltransferase complex subunit ASH2	ASH2L	ASH2L	0	9.62047e+06	0	1.23222e+06	4.22105e+06	0	5.68199e+06	2.11282e+06	6.13395e+06	8.51691e+06	8.10103e+06	6.959e+06	5.89606e+06	5.21071e+06	2.99563e+06	2.25521e+06	7.13348e+06	5.18692e+06	1.06292e+06	5.51084e+06	812788	6.82317e+06	7.45068e+06	4.16204e+06	0	4.41989e+06	2.67277e+06	3.25356e+06	1.92176e+07	2.36551e+06	0	4.49317e+06	6.43748e+06	0	3.95932e+06	1.1406e+06	5.97799e+06	8.02314e+06	5.50776e+06	6.93955e+06	4.01148e+06	0	0	4.0262e+06	1.27937e+06	1.14755e+07
A0A024RDL8	Argininosuccinate lyase isoform 1	ASL	ASL	6027280358	2433129615	2424672102	2358379406	2430410565	57070088	1248491921	1588412052	3659339889	2718041894	2502483380	4453988802	1578066164	2477264819	2025920548	2582176144	2640289600	8.32156e+08	2011222555	1745249227	1537937841	1264538160	2349442107	2964809831	3197024645	2143473687	1748288660	2135973180	1429159792	1972363667	3007144610	2388956858	1458701996	3931909001	1675113106	2579254507	3031690583	2207501119	4.07115e+08	1543159486	2445274555	6.06669e+07	2942414566	7.22571e+07	4166150298	4880600717
O95671	Probable bifunctional dTTP/UTP pyrophosphatase/methyltransferase protein	ASMTL	ASMTL	1.24563e+07	4.03982e+07	18868777	2.38773e+07	2.25792e+07	2.17879e+07	2.76325e+07	1.48747e+07	2.60628e+07	2.00825e+07	2.84606e+07	3.22181e+07	9.77259e+06	1.71222e+07	3.2386e+07	4.71864e+07	2.30565e+07	2.08317e+07	1.41756e+07	2.51985e+07	1.86384e+07	2.0298e+07	1.18166e+07	2.25511e+07	1.99194e+07	2.24261e+07	2.3304e+07	3.27425e+07	1.63406e+07	1.45558e+07	1.1986e+07	6.10901e+07	2.32596e+07	1.03868e+07	1.59951e+07	3.64901e+07	2.15967e+07	2.14394e+07	2.24538e+07	1.84977e+07	2.5007e+07	4.60992e+07	1.09486e+07	1.8598e+07	1.93403e+07	7.31484e+06
P45381	Aspartoacylase	ASPA	ASPA	0	3.97119e+06	3.53624e+06	4.59394e+06	5.18426e+06	3.27923e+06	4.51528e+06	3.72793e+06	3.24695e+06	4.44546e+06	4.34415e+06	3.74049e+06	2.52682e+06	4.28229e+06	7.24988e+06	4.42071e+06	3.27958e+06	5.0182e+06	3.20712e+06	5743425	6.07526e+06	7.60357e+06	1.66269e+06	4.56556e+06	3.39249e+06	3.75208e+06	4.93915e+06	3.70374e+06	5.18615e+06	4.59192e+06	3.03193e+06	4.69648e+06	4.88917e+06	1.81753e+06	3.05642e+06	3.69542e+06	5.19091e+06	5.03466e+06	6.41826e+06	4.23613e+06	3.18909e+06	2.21642e+06	2.42079e+06	1.78117e+06	1.1496e+06	2.60694e+06
Q12797	Aspartyl/asparaginyl beta-hydroxylase	ASPH	ASPH	2.40558e+07	9.89045e+07	6.75499e+07	1.4353e+08	120668508	1.03439e+08	1.29668e+08	1.37677e+08	7.28454e+07	9.45938e+07	9.11271e+07	8.93508e+07	5.10839e+07	147663645	9.23258e+07	1.27646e+08	1.45465e+08	1.14906e+08	7.52821e+07	1.07257e+08	1.03226e+08	1.04323e+08	1.40779e+08	9.08699e+07	4.09037e+07	108474827	113752124	1.21397e+08	8.48364e+07	8.52146e+07	5.97876e+07	1.25486e+08	9.24005e+07	2.12752e+07	4.62148e+07	5.24448e+07	7.35839e+07	1.8648e+08	1.48076e+08	5.47634e+07	6.98722e+07	3.88659e+07	3.12483e+07	2.88107e+07	1.01378e+08	3.40836e+07
Q5VYL4	Abnormal spindle-like microcephaly-associated protein	ASPM	ASPM	0	0	6.40686e+06	928424	0	673923	1.08098e+06	732060	0	0	626894	643119	5.57101e+06	410465	813068	466592	0	449892	731745	5.81723e+06	1.01522e+07	9.12278e+06	1.02682e+07	0	9.31514e+06	987346	9.75752e+06	0	0	533050	0	3.46585e+06	454950	0	2.80156e+06	484620	597225	706557	4.33934e+06	535381	6.2735e+06	8.53689e+06	5.61422e+06	6.69514e+06	7.28051e+06	5.27316e+06
Q6P528	ASPN protein	ASPN	ASPN	3.39017e+08	2.69284e+08	4.47618e+08	2.34683e+08	3.12121e+08	7.01935e+08	2.36227e+08	9.83428e+08	2.20794e+08	1.90335e+08	2.76698e+08	2.38056e+08	2.42441e+08	2.03804e+08	3.76401e+08	3.48176e+08	2.74527e+08	2.19992e+08	3.43128e+08	3.40095e+08	4.03109e+08	3.73194e+08	8.29529e+08	188057603	7.29215e+08	5.08177e+08	4.45946e+08	2.95901e+08	2.6594e+08	2.14482e+08	4.25457e+08	3.53718e+08	1.7548e+08	7.12053e+08	2.79401e+08	2.91025e+08	1.8231e+08	1.94216e+08	1.34574e+08	2.4654e+08	3.04919e+08	3.29759e+08	2.73654e+08	4.0914e+08	418419815	3.0665e+08
Q9BZE9	Tether containing UBX domain for GLUT4	ASPSCR1	ASPSCR1	1.12851e+07	3.62703e+07	1.85136e+07	3.68608e+07	3.18083e+07	1.6859e+07	2.72341e+07	2.92911e+07	3.17898e+07	4.24006e+07	4.07503e+07	4.17723e+07	1.80198e+07	3.2087e+07	2.97608e+07	3.71742e+07	1.75263e+07	9.08353e+07	2.06921e+07	4.1084e+07	3.91275e+07	3.15287e+07	1.87727e+07	2.81027e+07	8.76269e+06	2.46795e+07	2.03692e+07	3.30696e+07	4.30645e+07	2.74387e+07	2.43258e+07	3.55602e+07	3.35745e+07	1.69083e+07	1.55357e+07	3.10087e+07	4.33867e+07	3.19263e+07	5.10329e+07	3.75084e+07	5.44429e+07	1.28278e+07	2.01012e+07	1.69377e+07	2.44194e+07	2.24132e+07
A0A024R573	Asparaginase-like protein 1	ASRGL1	ASRGL1	7.18839e+07	2.72063e+07	1.29407e+07	1.68085e+07	1.35929e+07	5.49637e+06	1.38415e+07	3.02444e+07	1.71133e+07	5.98743e+07	3.06094e+07	9.66119e+06	1.2365e+07	1.19225e+07	4.49733e+06	1.47785e+07	7.25525e+06	4.52722e+07	7.12707e+06	9.98852e+06	9.1657e+06	8.70046e+06	6.42772e+06	2.94628e+07	5.84248e+06	6.12107e+06	1.6568e+07	1.98111e+07	2.54987e+07	2.24534e+07	1.52016e+07	1.88083e+07	2.18525e+07	799986	1.52215e+07	7.92305e+06	1.39773e+07	2.4278e+07	1.83307e+07	8.20678e+06	4.59855e+07	4.4269e+06	4.94655e+06	2.31481e+07	3.3245e+06	10196885
Q5T6L4	Argininosuccinate synthase	ASS	ASS;ASS1	3.63977e+07	1.47373e+08	8.05664e+07	1.19151e+08	1.99482e+08	1.17618e+08	5.62286e+07	7.46741e+07	9.94595e+07	1.16225e+08	1.04821e+08	3.81529e+07	5.37188e+07	9.06236e+07	8.96435e+07	113977195	6.23417e+07	2.69128e+08	5.70701e+07	9.50101e+07	119478151	5.41535e+07	1.06627e+08	1.61193e+08	9.04239e+07	6.95203e+07	1.18969e+08	1.49892e+08	136836642	8.65662e+07	1.03805e+08	1.13241e+08	127146604	2.73167e+07	8.1846e+07	1.48789e+08	7.41697e+07	1.67051e+08	8.06898e+07	5.0334e+07	1.02874e+08	4.82594e+07	8.59583e+07	4.91387e+07	4.96252e+07	6.59885e+07
Q8NFZ7	Argininosuccinate synthetase (Fragment)	ASS	ASS;ASS1	0	0	0	0	0	0	0	1.26361e+06	0	0	0	0	0	0	0	0	0	0	0	0	0	0	0	0	0	0	0	0	0	0	0	0	0	0	0	0	0	0	0	0	0	0	0	0	0	0
Q8NBU5	Outer mitochondrial transmembrane helix translocase	ATAD1	ATAD1	881633	5.21433e+06	2.72488e+06	6.24911e+06	7.33079e+06	1.35939e+06	1.02588e+07	5.44449e+06	1.26759e+07	9.29054e+06	5.08244e+06	1.04911e+07	3.3816e+06	6.61722e+06	5.8324e+06	3.60708e+06	6.6644e+06	3.41565e+06	2.53363e+06	8.70356e+06	4.91235e+06	4.88188e+06	3.38261e+06	3.6912e+06	3.57177e+06	8.56748e+06	3.83148e+06	4.13906e+06	1.17306e+07	1.73299e+06	1.59186e+06	4.64472e+06	7.25973e+06	3.11868e+06	1.8765e+07	4.94654e+06	1.87304e+06	1.41952e+06	1.31045e+07	4.52579e+06	8.24992e+06	1.80028e+06	0	1.45549e+06	4.14476e+06	3.17055e+06
A0A024R9G7	ATPase family, AAA domain containing 2, isoform CRA_c	ATAD2	ATAD2	2.91231e+06	1.6755e+07	6.08563e+06	1.14652e+07	9.67866e+06	8.9132e+06	8.00037e+06	9.52938e+06	1.32575e+07	2.51199e+07	1.42928e+07	2.14517e+07	6.67148e+06	1.21383e+07	1.57102e+07	1.67796e+07	1.67887e+07	1.76313e+07	4.93683e+06	2.423e+07	1.17219e+07	9.31078e+06	1.46805e+07	1.23307e+07	6.05727e+06	1.24174e+07	9.00594e+06	1.15625e+07	5.46074e+07	1.32033e+07	7.30046e+06	9.89842e+06	8.8386e+06	1.06239e+07	1.03971e+07	1.07374e+07	7.22823e+06	9.941e+06	2.32084e+07	1.09169e+07	9.08562e+06	4.3411e+06	4.39194e+06	3.15833e+06	5.9992e+06	3.92501e+06
Q9NVI7	ATPase family AAA domain-containing protein 3A	ATAD3A	ATAD3C;ATAD3A;DKFZp761L1023;ATAD3B	2.21045e+06	2.21665e+07	1.13468e+07	2.05522e+07	2.0829e+07	2.33719e+07	2.47658e+07	1.70434e+07	3.12891e+07	1.44479e+07	2.11235e+07	2.77197e+07	1.49656e+07	2.13813e+07	3.66303e+07	2.62456e+07	2.20127e+07	2.53065e+07	1.80421e+07	35891425	2.25491e+07	2.65952e+07	9.08691e+06	2.19846e+07	1.34746e+07	1.73504e+07	1.91145e+07	2.68841e+07	3.6684e+07	2.09879e+07	7.36792e+06	2.25944e+07	2.74635e+07	4.05649e+06	2.04702e+07	1.85651e+07	2.10515e+07	2.15045e+07	3.53501e+07	1.79767e+07	2.08643e+07	1.52725e+07	1.14404e+07	6.70491e+06	1.25857e+07	7.35329e+06
F5GXE4	Arginyl-tRNA--protein transferase 1	ATE1	ATE1	0	2.0785e+06	4.09469e+06	2.05977e+06	1.78707e+06	2.79603e+06	1.78934e+06	1.6492e+06	670366	2.05182e+06	2.62776e+06	1.64691e+06	0	1.98218e+06	0	4.58781e+06	2.6359e+06	3.30633e+06	3.76941e+06	6.99007e+06	2.42528e+06	5.53424e+06	5.25895e+06	1.12956e+06	6.21452e+06	4.57112e+06	3.81698e+06	1.49339e+06	5.22579e+06	1.53128e+06	0	2.45185e+06	1.71266e+06	0	3.66264e+07	0	1.49168e+06	2.34302e+06	1.00037e+07	3.42118e+06	1.30604e+06	6.4607e+06	1.31556e+07	3.42965e+06	4.40065e+06	1.36906e+06
A0A024RAY1	Activating transcription factor 7 interacting protein, isoform CRA_a	ATF7IP	ATF7IP	0	2.04529e+06	4.1906e+06	3.2015e+06	1.77742e+06	3.10937e+06	1.4285e+06	1.21862e+06	1.88634e+06	2.22199e+06	1.88195e+06	1.20005e+06	0	2.78897e+06	6.23929e+06	1.54556e+06	1.66718e+06	1.59215e+06	3.52189e+06	1.98967e+06	3.63573e+06	2.9395e+06	0	1.31771e+06	3.66776e+06	2.95813e+06	6.02318e+06	2.69892e+06	788137	0	1.32798e+07	0	1.76391e+06	6.35359e+06	1.33799e+06	1.00791e+06	1.77019e+06	0	0	1.96269e+06	0	0	628380	3.33775e+06	0	4.78482e+06
F8VQD9	Autophagy-related protein 101 (Fragment)	ATG101	ATG101	0	0	0	0	0	0	0	0	0	0	0	0	0	0	0	0	0	0	0	0	0	0	0	0	0	0	0	0	0	0	0	0	0	0	0	0	0	0	0	0	0	0	0	0	0	0
Q17RG0	ATG16L1 protein (Fragment)	ATG16L1	ATG16L1;FLJ10035;FLJ00045	779345	2.54935e+06	1.34295e+06	1.57129e+06	1.51662e+06	3.13875e+06	2.24432e+06	1.42797e+06	944625	0	0	868606	0	0	4.32554e+06	3.4123e+06	5.39979e+06	1.28317e+06	885572	1.73431e+06	1.17106e+06	3.35283e+06	968626	774937	969863	2.99377e+06	3.26229e+06	0	1.82221e+06	0	0	2.32824e+06	0	0	488882	0	933006	1.06198e+07	3.63658e+06	3.39818e+06	2.07326e+06	0	2.02046e+06	2.07892e+06	0	0
Q96BY7	Autophagy-related protein 2 homolog B	ATG2B	ATG2B	6.99266e+06	3.81772e+06	0	0	0	1.10307e+06	0	0	0	2.18187e+06	0	0	0	3.70061e+06	1.27727e+06	2.72146e+06	4.91534e+06	1.52428e+07	2.21837e+06	0	2.54016e+06	0	0	0	919095	0	910183	0	0	0	0	1.81243e+06	0	0	0	2.09336e+06	0	0	0	0	0	1.02681e+07	0	5.29727e+06	1.67506e+06	4.5353e+06
Q9NT62	Ubiquitin-like-conjugating enzyme ATG3	ATG3	ATG3	3.47004e+06	6.76594e+06	1.66958e+07	1.25811e+07	1.80378e+07	2.8368e+07	3.05728e+07	3.25099e+07	7.51604e+06	3.40091e+06	1.52255e+07	5.49145e+06	2.35236e+06	7.10937e+06	7.1621e+06	3.62618e+06	4.52981e+06	6.57918e+06	3.80856e+06	1.51203e+07	1.62788e+07	2.47247e+07	3.37197e+07	2.86797e+06	1.2451e+07	2.28372e+07	1.27124e+07	6.36149e+06	1.49159e+07	6.44658e+06	6.5692e+06	1.77833e+07	8.22429e+06	1.58711e+06	0	6.39299e+06	2.12092e+07	4.08922e+06	4.3716e+06	2.69774e+06	5.26127e+06	3.62172e+06	6.78048e+06	0	476804	3.3808e+06
A0A0S2Z5B0	Atlastin GTPase 1 isoform 1 (Fragment)	ATL1	SPG3A;ATL2;ATL1	6.1133e+06	1.78867e+07	1.10638e+07	2.48632e+07	4.66634e+07	1.45277e+07	1.81943e+07	7.48828e+06	1.65396e+07	1.28354e+07	1.15713e+07	1.29359e+07	7.60148e+06	3.26031e+07	3.60811e+07	1.63134e+07	2.8873e+07	2.11517e+07	7.86325e+06	4.3078e+07	4.19122e+07	4.26885e+07	4.76123e+07	3.03199e+07	1.10905e+07	1.38004e+07	1.01674e+07	6.33926e+06	3.44184e+07	4.03346e+07	1.05998e+07	2.38073e+07	4.75457e+07	7.05585e+06	4.45733e+07	2.33027e+06	1.5168e+07	1.7925e+07	5.7034e+07	1.05457e+07	1.56958e+07	2.56518e+06	0	4.75949e+06	2.11501e+06	2.89e+07
Q8NHH9	Atlastin-2	ATL2	SPG3A;ATL2;ATL1	0	5.83593e+06	451787	2.31286e+06	1.56931e+07	2.68972e+06	0	2.71971e+07	2.21914e+06	2.39119e+06	0	1.60252e+06	0	9.58979e+06	462982	4.20189e+06	1.17123e+07	2.02422e+07	1.57648e+06	2.23039e+06	3.38234e+06	0	1.57887e+06	4.03564e+06	2.01915e+06	776935	1.57898e+07	3.06955e+06	1.08549e+07	1.32797e+06	1.42518e+07	1.41276e+07	6.33882e+06	1.0208e+06	4.39835e+06	971631	969605	4.75972e+06	5.49416e+06	7.30976e+06	2.08657e+06	3.15866e+06	0	1.4838e+07	1.35695e+07	0
Q6DD88	Atlastin-3	ATL3	ATL3	0	8.58208e+06	3.20828e+06	1.0992e+07	1.52714e+07	0	1.40547e+07	1.72273e+07	9.81042e+06	1.34688e+07	1.24501e+07	1.5967e+07	7.1527e+06	9.17733e+06	8.91073e+06	8.8548e+06	6.39155e+06	6.84925e+06	4.57303e+06	8795778	7.72958e+06	1.05927e+07	0	1.07375e+07	6.88846e+06	2.7036e+06	1.89771e+07	5.67191e+06	4.60928e+06	6.77896e+06	5.15477e+06	8.48391e+06	1.20796e+07	2.30406e+06	3.74306e+06	7.79404e+06	7.96093e+06	8.19953e+06	8.42932e+06	5.96897e+06	3.42767e+06	0	8.11701e+06	0	0	0
F5H6I7	Atlastin-3	ATL3	ATL3	1.0907e+07	1.38534e+07	2.09821e+07	1.57589e+07	1.8562e+07	1.4811e+07	2.07022e+07	1.19456e+07	8.24826e+06	3.15818e+07	1.06136e+07	2.46473e+07	3.96499e+06	9.98785e+06	1.23423e+07	1.54949e+07	5.08469e+06	1.14584e+07	1.31348e+07	11248777	1.66545e+07	8.96643e+06	1.50364e+07	1.37942e+07	1.65996e+07	2.03084e+07	1.76257e+07	8.12501e+06	6.93817e+06	9.46446e+06	6.32541e+06	1.51381e+07	1.1368e+07	7.2108e+06	8.51025e+06	6.72425e+06	1.15154e+07	1.45324e+07	2.14905e+07	1.14344e+07	5.91e+06	1.13547e+07	8.44026e+06	9.30277e+06	1.40253e+07	9.21962e+06
Q13315	Serine-protein kinase ATM	ATM	DKFZp781A0353;ATM	0	7.02676e+06	841685	2.65171e+06	3.19895e+06	2.03208e+06	3.43607e+06	5.45443e+06	0	1.27815e+06	1.0941e+07	3.56359e+06	907230	940480	818055	424646	3.61428e+06	3.08028e+06	0	4.31585e+06	2.48333e+06	3.02242e+06	4.5755e+06	915655	0	1.70021e+06	1.51911e+06	4.48576e+06	2.72636e+06	1.30017e+06	725900	0	1.72091e+06	1.70977e+06	3.44195e+06	9.80051e+06	3.14988e+06	8.54063e+06	9.50041e+06	1.20358e+06	2.18327e+06	0	6.68732e+06	0	3.44566e+06	1.61817e+06
O00244	Copper transport protein ATOX1	ATOX1	Atox1;ATOX1	1.93754e+06	1.15636e+07	1.56501e+07	1.96692e+07	1.96078e+07	1.77312e+07	3.15363e+07	1.30603e+07	2.17218e+07	3.01341e+07	2.60942e+07	2.30363e+07	1.09958e+07	1.02674e+07	2.72996e+07	2.36968e+07	2.33976e+07	4.13351e+06	2.2152e+07	2.746e+07	2.90814e+07	3.33996e+07	1.97529e+07	1.65984e+07	1.9824e+07	1.26318e+07	1.25366e+07	2.39336e+07	3.10545e+07	1.63207e+07	5.74555e+06	7.85022e+06	2.75496e+07	0	5.42058e+06	2.81689e+07	1.64551e+07	1.16218e+07	5.03875e+07	1.9818e+07	1.40199e+07	6.25748e+06	1.31806e+07	1.18173e+07	7.83952e+06	8.60865e+06
P98196	Probable phospholipid-transporting ATPase IH	ATP11A	DKFZp434P0831;ATP11C;ATP11B;ATP11A	1.90854e+07	1.16444e+08	5.93767e+07	6.54657e+07	6.56836e+07	3.75245e+07	7.22143e+07	4.14518e+07	3.48228e+07	5.67668e+07	2.98835e+08	8.81487e+07	6.68599e+07	7.3313e+07	8.56112e+07	7.94289e+07	1.73744e+07	4.95193e+07	7.30346e+07	1.03345e+08	1.02975e+08	2.31627e+08	5.13907e+07	1.43386e+08	3.80186e+07	1.21253e+08	6.91606e+07	8.82285e+07	9.84376e+07	7.4808e+07	7.66648e+07	2.68075e+07	8.24706e+07	9.10827e+07	6.06318e+07	1.9631e+07	1.16686e+08	157945539	4.55325e+07	8.69979e+07	5.25553e+07	4.05113e+07	9.41976e+07	2.89267e+07	4.20631e+07	6.34016e+07
A0A024R7P3	Cation-transporting ATPase	ATP13A1	ATP13A1;DKFZp761L1623;FLJ00232	1.88689e+08	2.31693e+08	7.46326e+07	1.0613e+08	122261392	1.34588e+08	1.26928e+08	8.55094e+07	1.11629e+08	1.15632e+08	1.69797e+08	1.65838e+08	8.79406e+07	1.08284e+08	1.11863e+08	103744580	1.36799e+08	1.11613e+08	8.11427e+07	1.98286e+08	1.43881e+08	2.07134e+08	1.77514e+08	2.25323e+08	1.14926e+08	9.90199e+07	1.12348e+08	9.25752e+07	1.73729e+08	1.31822e+08	6.66039e+07	1.10503e+08	1.50181e+08	5.289e+07	1.39668e+08	1.43401e+08	1.27472e+08	2.09481e+08	145406528	1.23059e+08	1.32897e+08	8.98308e+07	109059278	8.25458e+07	1.30493e+08	6.53798e+07
P05023	Sodium/potassium-transporting ATPase subunit alpha-1	ATP1A1	ATP4A;DKFZp666G172;ATP12A;ATP1A4;ATP1A3;ATP1A2;ATP1A1	1.44298e+08	3.38741e+08	3.60972e+08	4.50054e+08	5.35805e+08	5.22129e+08	3.9256e+08	4.84474e+08	6.91849e+08	2.88123e+08	3.88542e+08	2.16654e+08	3.42051e+08	3.37407e+08	340372026	3.8595e+08	5.53872e+08	6.27802e+08	2.96844e+08	5.60481e+08	4.21024e+08	4.2245e+08	1.29071e+08	2.90132e+08	3.05335e+08	3.86482e+08	4.92543e+08	4.57515e+08	6.70123e+08	2.90799e+08	194122856	3.56822e+08	346156891	2.16965e+08	6.07084e+08	2.8474e+08	2.57925e+08	3.61485e+08	3.69381e+08	3.46336e+08	3.99279e+08	2.76461e+08	1.90455e+08	2.47013e+08	359264873	2.27753e+08
B1AKY9	Sodium/potassium-transporting ATPase subunit alpha	ATP1A2	ATP4A;DKFZp666G172;ATP12A;ATP1A4;ATP1A3;ATP1A2;ATP1A1	8.57499e+06	2.62981e+07	2.87141e+07	2.14749e+07	3.61659e+07	2.13394e+07	3.22268e+07	2.10074e+07	2.14556e+07	2.78884e+07	2.72275e+07	2.32632e+07	1.96185e+07	2.59131e+07	1.78751e+07	2.29679e+07	1.78241e+07	1.63174e+07	2.36738e+07	32989720	3.54834e+07	3.97792e+07	4.06455e+07	2.50486e+07	3.15671e+07	3.2257e+07	3.50489e+07	1.7913e+07	1.38368e+07	35273983	2.07047e+07	4.5896e+07	7.48109e+07	1.71559e+07	2.65288e+07	3.5531e+07	5.84848e+07	7.79075e+07	2.43071e+07	24876126	4.50849e+07	2.0276e+07	1.27849e+07	2.4568e+07	2.42106e+07	2.12019e+07
P05026	Sodium/potassium-transporting ATPase subunit beta-1	ATP1B1	ATP1B1	107953221	1.9437e+08	264108895	2.37944e+08	2.93708e+08	220126804	2.99301e+08	2.66326e+08	3.31052e+08	3.03717e+08	2.80208e+08	2.49646e+08	1.81751e+08	1.95257e+08	1.70589e+08	2.35561e+08	2.74691e+08	2.90195e+08	1.68017e+08	2.66811e+08	2.70666e+08	2.42397e+08	2.63489e+08	1.84609e+08	2.60684e+08	2.68694e+08	2.95142e+08	219181434	2.48194e+08	1.78902e+08	1.29752e+08	2.20719e+08	1.7833e+08	1.2259e+08	1.14837e+08	1.96991e+08	2.34347e+08	2.63559e+08	226670271	2.09554e+08	2.24981e+08	1.87142e+08	1.16615e+08	1.8861e+08	1.41805e+08	1.58093e+08
P54709	Sodium/potassium-transporting ATPase subunit beta-3	ATP1B3	ATP1B3	5.10688e+06	1.09148e+07	3.04236e+07	2.07796e+07	2.54589e+07	4.16101e+07	2.78224e+07	2.47094e+07	2.47437e+07	3.49976e+07	2.70091e+07	3.33003e+07	1.67985e+07	2.64417e+07	2.79132e+07	2.62113e+07	1.33441e+07	2.03906e+07	1.54179e+07	5.87868e+07	2.19596e+07	3.94226e+07	3.83837e+07	9.47488e+06	3.22944e+07	2.30479e+07	3.43471e+07	1.49954e+07	2.69557e+07	2.70529e+07	2.30945e+07	2.78715e+07	1.73246e+07	2.87903e+07	1.98375e+07	2.33887e+07	2.12197e+07	3.26203e+07	2.79474e+07	2.08942e+07	1.41228e+07	1.6106e+07	1.60757e+07	1.62389e+07	1.74028e+07	1.68048e+07
A0A0S2Z3L2	P-type Ca(2+) transporter (Fragment)	ATP2A2	DKFZp779G2251;DKFZp779O2152;ATP2A1;ATP2A2;ATP2A3	6.99611e+07	2.24389e+08	1.82864e+08	2.30184e+08	2.27319e+08	2.2825e+08	292171708	2.82502e+08	2.1996e+08	2.00218e+08	3.70382e+08	1.57661e+08	2.23214e+08	259121950	2.05106e+08	2.33311e+08	1.45917e+08	2.48627e+08	1.5864e+08	355385698	2.28143e+08	3.42795e+08	1.14986e+08	2.66808e+08	9.98835e+07	2.2284e+08	1.95069e+08	2.68522e+08	4.0659e+08	2.26048e+08	1.84335e+08	3.08341e+08	3.13852e+08	1.17968e+08	1.96016e+08	2.20804e+08	3.03647e+08	3.54128e+08	3.45185e+08	2.62187e+08	2.82231e+08	1.1525e+08	1.15109e+08	1.05899e+08	1.36164e+08	1.42977e+08
P20020	Plasma membrane calcium-transporting ATPase 1	ATP2B1	PMCA2;DKFZp686M088;ATP2B1;ATP2B3;ATP2B2;ATP2B4	3.47559e+07	9.9574e+06	1.87435e+07	1.02728e+07	8.99542e+06	1.01957e+06	1.30693e+07	1.92105e+07	0	6.96791e+06	7.66477e+06	1.51449e+07	4.93792e+06	6.18923e+06	5.71522e+06	1.83699e+07	811948	3.37737e+07	3.40856e+07	1.35337e+07	1.38289e+07	4.87133e+06	2.09209e+07	0	2.9786e+07	1.60068e+07	1.21178e+07	3.01569e+06	9.70205e+06	1.65325e+06	4.39137e+07	8.79361e+06	6.80465e+06	5.45189e+07	4.74096e+07	8.9536e+06	4.63284e+06	2.84742e+06	2.3726e+06	5.88897e+06	7.41634e+06	4.88382e+07	0	4.35528e+07	4.49006e+07	0
A0A024R968	Calcium-transporting ATPase	ATP2B4	PMCA2;DKFZp686M088;ATP8B3;ATP11B;ATP2B1;ATP2B3;ATP2B2;ATP2B4	6.09009e+07	5.89936e+07	1.72762e+08	2.25857e+08	2.38382e+08	1.48485e+08	8.71687e+07	2.34669e+08	7.61291e+07	7.88282e+07	9.04379e+07	9.50788e+07	1.81265e+08	1.90495e+08	1.12981e+08	8.74916e+07	7.49777e+07	1.01896e+08	8.53497e+07	1.37969e+08	1.78317e+08	1.7932e+08	1.28808e+08	7.50724e+07	5.25745e+07	1.32188e+08	1.83708e+08	7.50177e+07	4.1579e+07	7.11026e+07	7.95404e+07	9.00181e+07	5.45705e+07	5.54607e+07	5.23736e+07	9.03218e+07	9.11315e+07	6.28526e+07	109778438	6.36295e+07	8.84557e+07	7.25102e+07	1.35356e+08	1.62587e+08	1.72446e+08	1.29661e+08
P98194	Calcium-transporting ATPase type 2C member 1	ATP2C1	ATP2C1	1.10649e+07	2.14066e+07	2.3198e+06	1.13175e+07	1.57938e+07	1.81489e+06	1.25814e+07	1.41394e+07	6.10546e+06	1.58742e+07	1.40017e+07	6.54913e+06	5.48568e+06	1.49121e+07	7.08318e+06	1.14614e+07	1.38537e+07	3.07523e+07	3.16276e+06	1.75413e+07	1.01611e+07	1.25518e+07	5.9849e+06	3.47776e+07	3.87327e+06	1.6426e+07	1.80101e+07	4.18513e+06	2.08446e+07	8.24172e+06	1.32452e+07	1.83299e+07	1.22873e+07	1.4218e+07	2.48149e+06	2.05294e+06	5.80854e+06	2.29551e+07	2.73064e+07	1.11776e+07	9.37585e+06	2.32685e+06	1.20546e+07	3.83617e+06	1.08256e+06	7.70359e+06
P25705	ATP synthase subunit alpha, mitochondrial	ATP5F1A	ATP5F1A	4.77688e+08	1108234830	1047681620	1467535666	1359053149	1239287897	1806086855	1263966227	1494982226	1243632956	1546667121	1207383989	927360553	1126667910	1190584021	1149596017	1394640654	1547271804	1231581467	1468989519	1521348162	1698781450	9.11269e+08	1230946335	8.56883e+08	1271246697	1562427525	1221168855	1948010161	1081458241	636994998	1053682645	1577233390	5.7058e+08	8.23936e+08	8.18558e+08	1340873434	1227069070	1505810273	1178301257	1534861710	6.84841e+08	5.36142e+08	7.42398e+08	9.26877e+08	6.70948e+08
P30049	ATP synthase subunit delta, mitochondrial	ATP5F1D	ATP5F1D	3.90005e+07	8.51103e+07	8.46008e+07	1.5516e+08	1.04304e+08	1.58791e+08	134114542	9.29947e+07	9.33738e+07	8.5649e+07	8.38271e+07	7.47152e+07	2.13108e+08	8.42207e+07	5.3346e+07	6.28167e+07	8.89519e+07	119153523	7.91247e+07	74208148	8.36292e+07	1.01795e+08	5.78229e+07	6.44551e+07	7.32653e+07	9.31765e+07	1.664e+08	9.00262e+07	9.01581e+07	6.17682e+07	5.67918e+07	7.00882e+07	8.58999e+07	3.71605e+07	2.24127e+08	4.8884e+07	7.48781e+07	6.78907e+07	1.06759e+08	7.5916e+07	1.26573e+08	6.02448e+07	3.70939e+07	8.64401e+07	1.01845e+08	4.48902e+07
Q5VTU8	ATP synthase subunit epsilon-like protein, mitochondrial	ATP5F1EP2	ATP5F1E;ATP5F1EP2	6.73047e+06	1.35477e+07	1.07036e+07	1.45933e+07	1.30731e+07	1.39536e+07	1.88918e+07	1.55815e+07	2.23894e+07	1.42954e+07	1.56627e+07	1.42298e+07	1.02855e+07	1.35375e+07	1.13168e+07	1.13585e+07	1.9059e+07	1.54227e+07	1.26089e+07	12909699	1.54131e+07	1.90516e+07	1.12281e+07	1.12855e+07	1.11048e+07	1.26841e+07	1.79283e+07	1.26747e+07	1.81607e+07	1.10532e+07	5.08309e+06	1.04369e+07	1.37152e+07	6.64152e+06	8.21624e+06	1.0489e+07	1.2352e+07	1.05958e+07	1.82503e+07	1.50279e+07	1.40389e+07	6.69767e+06	7.70264e+06	8.40096e+06	1.12687e+07	1.11274e+07
Q9UII2	ATPase inhibitor, mitochondrial	ATP5IF1	ATP5IF1	1.72734e+07	2.97626e+07	5.92568e+06	1.76534e+07	1.75318e+07	7.28272e+06	2.98269e+07	1.49733e+07	2.00009e+07	3.18123e+07	3.22329e+07	2.33947e+07	2.25549e+07	2.35647e+07	1.59423e+07	2.63095e+07	1.48436e+07	1.87483e+07	2.02375e+07	4.45743e+07	2.65357e+07	3.12346e+07	1.77093e+07	1.22315e+07	1.4041e+07	1.43141e+07	2.2341e+07	3.06458e+07	2.80722e+07	2.672e+07	2.00093e+07	2.6544e+07	3.05145e+07	1.64977e+07	2.52623e+07	2.44366e+07	4.19773e+07	1.76541e+07	7.19064e+07	3.04554e+07	32349030	1.63133e+07	1.9491e+07	1.8774e+07	1.93272e+07	2.34325e+07
Q6IB54	ATP synthase-coupling factor 6, mitochondrial	ATP5J	ATP5J;ATP5PF	6.4648e+07	6.53034e+07	7.41336e+07	7.61177e+07	7.05294e+07	8.52158e+07	9.82551e+07	8.13748e+07	8.33316e+07	7.67687e+07	7.71281e+07	9.14266e+07	6.54913e+07	6.78026e+07	7.30025e+07	7.36661e+07	7.84743e+07	8.97804e+07	6.01849e+07	5.85311e+07	6.25302e+07	6.91184e+07	7.03828e+07	7.85015e+07	5.86048e+07	6.31122e+07	7.29536e+07	7.79985e+07	9.11391e+07	6.11475e+07	5.48745e+07	7.27779e+07	6.98658e+07	6.46021e+07	4.19846e+07	7.44715e+07	7.41597e+07	6.81511e+07	1.21097e+08	7.61603e+07	7.99293e+07	5.18999e+07	4.66541e+07	4.95962e+07	6.98001e+07	5.3191e+07
Q96IX5	ATP synthase membrane subunit DAPIT, mitochondrial	ATP5MD	ATP5MD	9.81055e+06	1.86363e+07	1.92753e+07	1.82845e+07	2.17594e+07	1.8464e+07	3.35285e+07	2.4949e+07	3.28251e+07	1.80547e+07	2.48689e+07	2.04217e+07	1.62487e+07	2.32433e+07	2.65568e+07	1.94177e+07	2.41089e+07	2.37994e+07	1.59122e+07	2.79777e+07	2.06252e+07	2.65177e+07	1.11372e+07	1.93769e+07	1.65705e+07	2.01231e+07	1.64562e+07	2.25089e+07	3.42368e+07	1.82824e+07	1.48483e+07	2.21281e+07	2.37778e+07	1.12036e+07	1.53583e+07	1.53354e+07	2.06789e+07	2.10263e+07	2.81977e+07	17678579	2.51856e+07	1.15802e+07	8.55309e+06	1.05586e+07	8.97818e+06	1.37816e+07
P56385	ATP synthase subunit e, mitochondrial	ATP5ME	ATP5ME	2.99926e+07	6.29368e+07	6.10283e+07	7.08712e+07	6.99718e+07	5.79903e+07	9.90432e+07	5.53182e+07	5.02882e+07	5.55335e+07	5.15372e+07	5.08778e+07	6.06497e+07	6.23757e+07	4.97067e+07	5.19291e+07	4.94078e+07	4.70711e+07	5.17514e+07	7.3439e+07	8.49843e+07	7.70212e+07	3.86532e+07	3.20763e+07	5.57878e+07	7.05572e+07	7.35306e+07	6.94524e+07	7.85605e+07	5.7275e+07	3.05611e+07	3.46777e+07	6.4758e+07	2.97948e+07	4.54774e+07	4.62493e+07	5.57686e+07	4.15439e+07	7.00213e+07	4.68656e+07	7.00403e+07	3.05597e+07	2.45118e+07	4.57504e+07	3.55607e+07	2.97979e+07
P56134	ATP synthase subunit f, mitochondrial	ATP5MF	ATP5MF;ATP5MF-PTCD1	1.73047e+07	3.07159e+07	4.47973e+06	9.79943e+06	3.118e+06	2.09992e+06	1.57197e+07	5.13233e+06	3.09251e+07	1.92465e+07	2.14625e+07	5.01746e+06	5.34937e+07	2.07758e+07	2.09557e+07	1.94122e+07	1.29134e+07	3.10546e+07	2.96273e+07	1.02293e+07	2.00193e+07	1.95469e+07	1.58931e+07	5.31746e+07	7.75364e+06	8.10646e+06	1.73789e+07	3.64357e+07	2.59967e+07	2.51813e+07	1.55128e+07	1.66238e+07	3.19094e+07	9.58215e+06	3.45041e+07	2.29097e+07	5.02939e+07	6.32191e+07	6.529e+07	4.07678e+07	2.90408e+07	1.37272e+07	8.08112e+06	2.5769e+06	1.18704e+07	2.52286e+07
A0A0A0MTQ5	ATP synthase subunit ATP5MPL, mitochondrial	ATP5MPL	ATP5MPL;C14orf2	0	1.1567e+07	1.49853e+07	1.7686e+07	1.97453e+07	1.11317e+07	1.20352e+07	1.22679e+07	1.50678e+07	1.83149e+07	2.37799e+07	8.58949e+06	2.78961e+06	2.75106e+06	1.32774e+07	1.29048e+07	8.08799e+06	1.21994e+07	6.27672e+06	1.35969e+07	5.84378e+06	1.23264e+07	6.15437e+06	1.91225e+07	2.83105e+06	3.49744e+06	6.89688e+06	1.12523e+07	2.29312e+07	1.99649e+06	4.21046e+06	3.5321e+06	3.37509e+06	4.66277e+06	3.43157e+06	9.35161e+06	6.02242e+06	5.86021e+06	9.29346e+06	1.4732e+06	0	0	1.33377e+06	0	1.83897e+06	7.30858e+06
P24539	ATP synthase F(0) complex subunit B1, mitochondrial	ATP5PB	ATP5PB	2.10301e+07	7.44153e+07	7.16589e+07	1.01396e+08	9.77743e+07	9.50156e+07	1.27304e+08	1.04294e+08	1.18972e+08	8.67951e+07	1.07576e+08	6.57527e+07	4.62332e+07	8.3623e+07	8.58781e+07	8.70047e+07	7.9943e+07	9.50033e+07	7.71134e+07	94649937	8.70176e+07	9.40286e+07	3.22699e+07	7.77965e+07	5.89239e+07	8.90213e+07	9.0566e+07	7.86127e+07	1.07836e+08	6.84381e+07	3.84437e+07	6.89846e+07	9.20634e+07	3.13542e+07	4.09311e+07	4.7038e+07	8.59144e+07	7.68124e+07	1.06471e+08	6.02521e+07	7.94065e+07	1.31563e+07	2.62689e+07	2.74131e+07	3.41018e+07	4.22722e+07
O75947	ATP synthase subunit d, mitochondrial	ATP5PD	ATP5PD;ATP5H	1.43554e+08	3.52424e+08	1.96279e+08	2.72974e+08	2.31848e+08	2.3249e+08	2.35833e+08	234085617	2.4622e+08	2.0936e+08	2.63937e+08	2.04694e+08	4.46841e+08	2.66348e+08	2.05354e+08	2.68408e+08	3.06341e+08	2.225e+08	2.48683e+08	2.76466e+08	2.27156e+08	2.47078e+08	2.6021e+08	2.20557e+08	2.01753e+08	2.43304e+08	2.4543e+08	2.86339e+08	2.66401e+08	2.3574e+08	3.05016e+08	1.57878e+08	2.4514e+08	1.71644e+08	2.34365e+08	2.81339e+08	3.63014e+08	337570232	2.76708e+08	3.01573e+08	237371319	165132736	3.6574e+08	2.69315e+08	3.03692e+08	3.66192e+08
P48047	ATP synthase subunit O, mitochondrial	ATP5PO	ATP5PO	9.49401e+07	1.65373e+08	1.54247e+08	2.10024e+08	1.67412e+08	1.8142e+08	268913903	1.8864e+08	2.57833e+08	1.78973e+08	2.05823e+08	197968782	1.28019e+08	1.8471e+08	2.03468e+08	1.8724e+08	2.23021e+08	2.24801e+08	197506955	2.25268e+08	2.26264e+08	2.56402e+08	1.2842e+08	1.9589e+08	1.50857e+08	1.92161e+08	220839823	1.51143e+08	2.91768e+08	1.57094e+08	108906984	1.4365e+08	2.07838e+08	9.34336e+07	1.18219e+08	1.27661e+08	1.73685e+08	1.66289e+08	2.54194e+08	1.58991e+08	2.10589e+08	1.33187e+08	8.60812e+07	116996476	1.63976e+08	1.20921e+08
V5JSF4	ATP synthase subunit a	ATP6	ATPase;mtATP6;ATP6;atp6	4.14711e+06	8.70336e+06	8.96983e+06	1.01088e+07	9.2042e+06	1.06844e+07	1.47225e+07	8.74401e+06	1.3929e+07	4.51891e+06	1.16176e+07	0	5.93083e+06	9.86363e+06	1.24179e+07	8.6745e+06	8.91137e+06	0	9.95014e+06	11922395	1.50029e+07	1.63239e+07	0	1.18906e+07	4.6828e+06	11686535	1.18715e+07	1.00785e+07	1.61574e+07	9.25537e+06	6.79025e+06	9.8618e+06	1.20779e+07	5.91075e+06	6.33828e+06	6.86211e+06	9.48878e+06	9.82802e+06	1.03504e+07	8.56821e+06	0	5.24811e+06	5.35127e+06	4.35061e+06	0	7.67721e+06
A0A7H1D1M5	ATP synthase subunit 6 (Fragment)	ATP6	ATPase;mtATP6;ATP6;atp6	0	0	0	0	0	0	0	0	0	0	0	0	0	0	0	0	0	1.30201e+07	0	0	0	0	0	0	0	0	0	0	0	0	0	0	0	0	0	0	0	0	0	0	0	0	0	0	0	0
A0A7H1D210	ATP synthase subunit 6 (Fragment)	ATP6	ATP6	8.52323e+06	1.15923e+07	1.32383e+07	1.16906e+07	1.76459e+07	1.07921e+07	2.11283e+07	2.07458e+07	1.01597e+07	2.13057e+07	1.76741e+07	1.27726e+07	1.27514e+07	1.67152e+07	2.21971e+07	1.70962e+07	9.4631e+06	1.52863e+07	1.3745e+07	2.30649e+07	1.56742e+07	1.60735e+07	1.364e+07	1.15262e+07	0	1.1646e+07	1.51767e+07	1.90883e+07	3.67321e+07	2.36334e+07	1.85061e+07	1.60262e+07	1.85483e+07	1.1334e+07	8.95446e+06	1.28781e+07	3.57912e+07	3.1595e+07	3.77705e+07	1.65588e+07	1.21881e+07	6.35808e+06	6.047e+06	5.96655e+06	3.79325e+06	1.30083e+07
F1AKZ2	ATP synthase subunit a	ATP6	ATPase;ATP6	0	0	0	0	0	0	0	0	0	0	0	0	0	0	0	0	0	1.30201e+07	0	0	0	0	0	0	0	0	0	0	0	0	0	0	0	0	0	0	0	0	0	0	0	0	0	0	0	0
A0A1B0GTB0	ATPase H(+)-transporting lysosomal accessory protein 2 (Fragment)	ATP6AP2	ATP6AP2	2.65982e+07	7.87131e+07	9.31011e+07	9.8497e+07	7.64183e+07	6.93242e+07	6.43958e+07	6.10119e+07	7.69998e+07	8.68944e+07	1.26404e+08	6.53991e+07	1.61481e+08	1.54439e+08	5.61527e+07	3.98624e+07	4.74919e+07	4.14432e+07	5.86507e+07	1.41222e+08	8.75021e+07	101984606	5.29615e+07	5.4827e+07	1.05609e+08	1.59371e+08	1.32048e+08	5.54156e+07	2.47121e+07	8.2023e+07	6.15385e+07	3.00488e+07	6.21622e+07	3.97416e+07	5.78383e+07	4.45348e+07	4.88644e+07	8.38726e+07	2.81718e+07	6.03543e+07	4.84646e+07	7.5005e+07	4.63512e+07	9.83895e+07	6.43278e+07	4.44972e+07
Q9Y487	V-type proton ATPase 116 kDa subunit a2	ATP6V0A2	DKFZp781J1951;DKFZp686N0561;ATP6V0A1;ATP6V0A2	0	1.79525e+06	0	2.40319e+06	2.3157e+06	3.31689e+06	0	4.53675e+06	0	1.30332e+06	0	2.33605e+06	0	0	0	852318	2.54981e+06	0	0	1866584	1.78423e+06	1.41897e+06	3.15427e+06	0	4.88043e+06	2.76595e+06	0	1.80001e+06	0	2.36726e+06	0	1.76909e+06	0	0	0	2.31382e+06	1.45231e+06	0	0	1.97398e+06	1.96917e+06	0	0	0	0	0
P27449	V-type proton ATPase 16 kDa proteolipid subunit	ATP6V0C	ATP6V0C	4.01267e+06	1.34977e+07	2.01964e+07	2.14324e+07	1.73415e+07	1.80015e+07	1.60148e+07	1.42335e+07	9.04109e+06	9.39437e+06	7.06946e+06	3.29877e+06	1.5523e+07	7.24626e+06	7.34562e+06	5.04284e+06	1.02366e+07	1.81023e+07	1.16157e+07	3.50927e+07	1.46208e+07	1.37935e+07	0	3.16706e+06	1.35415e+07	1.3429e+07	2.95307e+07	1.26409e+07	2.92735e+06	6.43589e+06	9.45562e+06	1.72864e+07	1.71582e+07	9.11493e+06	4.21815e+06	1.93182e+07	2.04282e+07	1.00546e+07	1.50971e+07	1.19591e+07	1.94559e+07	1.13036e+07	4.49164e+06	1.06418e+07	9.443e+06	1.77808e+07
H3BNI4	V-type proton ATPase proteolipid subunit	ATP6V0C	ATP6V0C	4.32868e+06	8.67397e+06	1.17032e+07	2.75982e+07	9.4462e+06	1.14105e+07	1.67925e+07	1.06034e+07	1.58511e+07	1.98022e+07	2.89049e+07	8.10156e+06	7.48288e+06	3.33879e+07	9.79582e+06	1.72625e+07	1.07909e+07	8.54292e+06	8.54322e+06	21805929	1.33564e+07	1.23574e+07	7.38081e+06	1.1661e+07	9.35525e+06	1.48504e+07	1.45609e+07	1.03416e+07	1.22076e+07	8.57942e+06	9.10058e+06	1.06853e+07	9.92231e+06	5.09003e+06	8.43931e+06	9.24397e+06	1.43348e+07	1.08672e+07	1.34608e+07	1.27298e+07	8.9938e+06	5.60371e+06	5.15506e+06	8.42333e+06	6.57877e+06	5.16704e+06
F5GYQ1	V-type proton ATPase subunit	ATP6V0D1	ATP6V0D1	1.73928e+07	3.91058e+07	3.14763e+07	2.99614e+07	3.14565e+07	2.40174e+07	4.59215e+07	2.15866e+07	4.04079e+07	6.09354e+07	33953753	3.53038e+07	1.47285e+07	3.10518e+07	3.51771e+07	2.43302e+07	2.2684e+07	2.95415e+07	2.55057e+07	4.09353e+07	2.33562e+07	4.34008e+07	2.4661e+07	2.74977e+07	1.69358e+07	3.40157e+07	3.37649e+07	2.75125e+07	2.25914e+07	3.25901e+07	1.20184e+07	3.18723e+07	3.24922e+07	1.43539e+07	1.72318e+07	2.79824e+07	2.81804e+07	2.74319e+07	3.54362e+07	1.34127e+07	3.7058e+07	1.60089e+07	3.06137e+07	9.55204e+06	2.09319e+07	1.68517e+07
P38606	V-type proton ATPase catalytic subunit A	ATP6V1A	ATP6V1A	1.30685e+08	167416920	1.8376e+08	2.68873e+08	2.64727e+08	1.63245e+08	2.40068e+08	1.91471e+08	198707056	2.45653e+08	2.9261e+08	2.26207e+08	1.36793e+08	233359311	2.37444e+08	2.58896e+08	1.87948e+08	1.9039e+08	1.91367e+08	2.00795e+08	2.69769e+08	2.19673e+08	2.92533e+08	2.02577e+08	2.19338e+08	2.28909e+08	2.80019e+08	2.39693e+08	2.89721e+08	260593010	1.14065e+08	2.70806e+08	3.60826e+08	1.23724e+08	1.563e+08	1.93979e+08	3.4028e+08	2.77218e+08	3.8077e+08	263448531	279924677	1.83099e+08	1.52187e+08	2.0176e+08	1.52087e+08	1.33982e+08
P21283	V-type proton ATPase subunit C 1	ATP6V1C1	ATP6V1C1	7.18381e+07	9.68234e+07	1.67513e+08	1.97177e+08	1.92938e+08	1.63274e+08	1.17965e+08	1.19551e+08	1.38076e+08	1.32679e+08	1.05706e+08	1.35784e+08	1.91726e+08	2.07936e+08	1.73422e+08	1.3941e+08	1.19638e+08	9.89399e+07	1.7752e+08	8.40777e+07	2.69066e+08	1.2539e+08	1.84926e+08	6.79698e+07	2.3503e+08	1.35563e+08	2.54369e+08	1.45326e+08	9.79765e+07	1.09063e+08	1.42542e+08	9.31428e+07	1.33507e+08	9.30863e+07	1.22142e+08	1.02677e+08	1.49018e+08	8.59509e+07	1.46018e+08	1.37478e+08	2.03297e+08	101289997	1.48402e+08	1.93319e+08	1.62278e+08	1.59421e+08
Q53Y06	ATPase, H+ transporting, lysosomal 31kDa, V1 subunit E isoform 1	ATP6V1E1	ATP6V1E1;ATP6V1E2	3.07172e+07	9.54691e+07	6.18187e+07	1.08907e+08	1.07504e+08	5.53606e+07	9.41941e+07	8.51715e+07	5.83859e+07	9.67261e+07	1.24407e+08	9.4106e+07	5.22684e+07	8.87707e+07	9.71237e+07	8.61532e+07	8.4095e+07	9.51684e+07	5.59562e+07	9.55046e+07	1.00299e+08	1.09149e+08	1.01964e+08	109261937	6.11382e+07	6.86309e+07	8.70437e+07	8.66383e+07	111448518	8.50129e+07	4.59097e+07	9.38063e+07	1.21074e+08	1.86968e+07	7.46679e+07	7.52203e+07	148117249	1.14216e+08	1.59555e+08	1.39267e+08	8.9569e+07	4.39118e+07	6.46905e+07	4.84752e+07	3.72354e+07	3.99084e+07
A4D1K0	V-type proton ATPase subunit F	ATP6V1F	ATP6V1F	7.3508e+06	2.35622e+07	1.27835e+07	2.28334e+07	1.80979e+07	1.5346e+07	1.96008e+07	1.34879e+07	9.39845e+06	1.98723e+07	2.3561e+07	2.20986e+07	1.04751e+07	2.0435e+07	1.90615e+07	1.54578e+07	1.71581e+07	1.42067e+07	9.17019e+06	2.37071e+07	2.40989e+07	2.51709e+07	4.05417e+07	2.27809e+07	1.55127e+07	1.70908e+07	2.05221e+07	2.01009e+07	3.80101e+07	1.71957e+07	4.91612e+06	3.09307e+07	2.2073e+07	4.1309e+06	6.74742e+06	1.89213e+07	1.9051e+07	2.11177e+07	3.01975e+07	2.18906e+07	1.52853e+07	7.51141e+06	9.10208e+06	7.28057e+06	1.71787e+07	6.87353e+06
A0A024R883	V-type proton ATPase subunit G	ATP6V1G1	ATP6V1G2-DDX39B;ATP6V1G2;ATP6V1G1	2.98867e+08	2.17682e+07	4.37059e+07	5.18689e+07	5.83619e+07	5.92163e+07	3.20524e+07	5.94176e+07	1.54977e+07	3.64788e+07	4.09266e+07	2.45585e+07	2.07628e+07	4.88486e+07	5.4229e+07	3.85426e+07	4.99621e+07	3.93274e+07	1.30411e+07	25555611	2.11461e+07	3.48687e+07	4.50939e+07	3.44695e+07	1.49578e+07	3.51658e+07	2.04954e+07	4.74988e+07	3.03218e+07	1.67714e+07	4.44027e+07	2.1529e+07	5.13834e+07	1.05911e+07	4.41401e+07	3.41054e+07	6.45529e+07	4.05727e+07	6.9173e+07	6.31383e+07	4.10264e+07	1.33483e+07	1.70244e+07	1.33977e+07	1.14574e+07	4.01177e+07
A0A024R7U9	V-type proton ATPase subunit H	ATP6V1H	ATP6V1H	2.00044e+07	6.28755e+07	3.17939e+07	4.74514e+07	4.85528e+07	3.56467e+07	2.88776e+07	2.65086e+07	2.97768e+07	3.98858e+07	4.53716e+07	2.6006e+07	3.30299e+07	4.7963e+07	6.34695e+07	2.76896e+07	4.8231e+07	3.16913e+07	3.04843e+07	3.409e+07	5.36875e+07	3.78622e+07	2.27434e+07	4.26493e+07	2.68153e+07	3.27034e+07	6.11766e+07	4.01379e+07	3.59287e+07	2.74326e+07	3.23207e+07	4.397e+07	4.61255e+07	3.12974e+07	2.49304e+07	3.27862e+07	52218976	5.23078e+07	4.23102e+07	3.57514e+07	3.71625e+07	3.8797e+07	4.52535e+07	3.64257e+07	2.74767e+07	5.60471e+07
A1DV59	ATP synthase protein 8	ATP8	ATPase;ATP8;atp8	6.40406e+06	1.65447e+07	8.35857e+06	1.07626e+07	1.07076e+07	8.13939e+06	1.49123e+07	1.07538e+07	1.17883e+07	1.15852e+07	1.46465e+07	1.00282e+07	9.66577e+06	9.71069e+06	7.35133e+06	1.06764e+07	1.05394e+07	1.12516e+07	6.28358e+06	5833170	2.76779e+06	2.94617e+06	4.86305e+06	1.70216e+07	3.15054e+06	8.46905e+06	9.89069e+06	1.45102e+07	2.08571e+07	1.47114e+07	7.40272e+06	1.47264e+07	1.73479e+07	8.7086e+06	1.08969e+07	1.00271e+07	1.38176e+07	1.26808e+07	1.89932e+07	1.19887e+07	1.18888e+07	2.93449e+06	2.21935e+06	0	1.23299e+06	7.08936e+06
O75110	Probable phospholipid-transporting ATPase IIA	ATP9A	ATP9A	0	0	0	0	0	0	0	697410	2.2377e+06	0	0	0	0	0	0	879379	0	0	0	1.64259e+06	0	1.27904e+06	965863	1.53172e+06	0	1.19556e+06	0	0	0	0	0	0	0	0	386421	0	0	0	0	555490	0	0	2.6323e+06	0	0	0
I3L448	ATP synthase mitochondrial F1 complex assembly factor 1	ATPAF1	ATPAF1	4.13819e+06	3.87953e+06	2.70789e+06	4.89724e+06	4.99288e+06	4.33803e+06	6.87848e+06	2.21921e+06	6.95022e+06	3.48929e+06	5.28882e+06	5.4872e+06	2.13378e+06	2.95229e+06	7.18753e+06	4.78817e+06	3.91833e+06	4.81426e+06	4.3279e+06	845131	0	0	0	5.33146e+06	0	2.28142e+06	2.5371e+06	9.95336e+06	7.79348e+06	4.00235e+06	6.75914e+06	5.26229e+06	9.06449e+06	7.00842e+06	5.10028e+06	4.07683e+06	5.25597e+06	3.06031e+06	1.26311e+07	5.68723e+06	3.76307e+06	0	2.00603e+06	3.34243e+06	0	4.08598e+06
Q8N5M1	ATP synthase mitochondrial F1 complex assembly factor 2	ATPAF2	ATPAF2	4.36744e+06	1.00434e+06	8.5483e+06	1.73482e+07	1.48248e+07	8.60598e+06	1.75575e+07	1.24307e+07	0	2.03688e+06	2.28193e+06	6.68301e+06	708730	0	9.5927e+06	615921	8.94943e+06	3.52296e+06	1.29221e+06	3.15442e+06	9.92308e+06	3.92477e+06	0	0	4.48115e+06	1.07402e+07	1.54408e+07	1.12676e+06	2.44877e+06	2.28524e+06	0	797005	1.6006e+06	6.36454e+06	1.18445e+07	781672	946723	0	0	982355	1.01117e+07	4.66118e+06	0	6.59433e+06	6.74517e+06	0
P46100	Transcriptional regulator ATRX	ATRX	ATRX	7.87977e+06	8.10955e+06	4.74255e+06	1.00147e+07	1.56118e+07	6.94599e+06	1.51184e+07	1.01119e+07	5.19584e+06	8.8182e+06	1.05092e+07	6.59873e+06	2.55699e+06	8.35352e+06	8.69288e+06	4.83867e+06	5.46241e+06	7.60701e+06	3.37351e+06	1.31569e+07	1.93036e+07	8.5336e+06	4.30173e+06	4.88731e+06	8.70819e+06	4.92448e+06	5.36773e+06	2.56268e+06	2.27649e+06	4.20339e+06	1.75021e+06	5.09989e+06	6.73041e+06	1.77647e+06	4.37718e+06	2.38023e+06	9.39067e+06	3.64415e+06	909788	3.65922e+06	4.68042e+06	4.06373e+06	8.00225e+06	7.80758e+06	6.83561e+06	2.93626e+06
Q9UBB4	Ataxin-10	ATXN10	ATXN10;DKFZp434I1726	1.00835e+08	4.17795e+07	1.36343e+08	1.33993e+08	1.78954e+08	1.54925e+08	6.00407e+07	1.38033e+08	1.07984e+08	4.78392e+07	1.32013e+08	1.03446e+08	3.01964e+08	9.51963e+07	2.51649e+08	177561411	2.95279e+07	1.43249e+08	1.27688e+08	2.27994e+07	9.54424e+07	2.56177e+08	6.71385e+07	7.97798e+08	4.55047e+07	5.3123e+07	8.28104e+07	4.81702e+07	1.60727e+08	3.42016e+07	3.10797e+07	4.10473e+07	5.62999e+07	2.16136e+08	1.10638e+08	5.22608e+07	1.35907e+08	2.67715e+08	2.49001e+07	2.29403e+08	5.10255e+07	533197	1.24829e+08	8.17707e+07	9.67361e+07	1.90131e+07
Q99700	Ataxin-2	ATXN2	ATXN2	0	0	1.35801e+06	1.17844e+06	2.42179e+06	1.37898e+06	3.54947e+06	3.26882e+06	2.95138e+06	1.9946e+06	2.74187e+06	0	0	4.94127e+06	1.94753e+06	6.6309e+06	1.54165e+06	0	0	3.58436e+06	5.04558e+06	3.8495e+06	1.36755e+06	2.30829e+06	0	2.66274e+06	4.67707e+06	3.68383e+06	5.75407e+06	2.10676e+06	0	5.3067e+06	3.53746e+06	1.07659e+06	2.16612e+06	0	1.35153e+06	3.07039e+06	3.47027e+06	3.67835e+06	1.02476e+06	0	1.44885e+06	1.34883e+06	0	0
Q8WWM7	Ataxin-2-like protein	ATXN2L	ATXN2L	1.0855e+07	6.21559e+07	2.96817e+07	2.44621e+07	3.64369e+07	2.67367e+07	2.77489e+07	2.15707e+07	8.03782e+07	3.83663e+07	2.54062e+07	2.18759e+07	2.72219e+07	2.32271e+07	1.99649e+07	2.65097e+07	1.62516e+07	3.03174e+07	1.81805e+07	3.33137e+07	2.78358e+07	4.58228e+07	4.41242e+07	4.74515e+07	2.36396e+07	3.01552e+07	3.729e+07	7.51708e+07	5.71078e+07	3.29997e+07	1.63081e+07	3.20463e+07	3.70903e+07	2.87995e+07	1.8482e+07	2.18962e+07	3.99645e+07	6.06939e+07	6.60042e+07	2.06287e+07	5.64331e+07	2.46045e+07	2.39669e+07	1.77017e+07	1.64295e+07	2.09549e+07
D3VVB3	Ubiquitinyl hydrolase 1 (Fragment)	ATXN3	ATXN3	0	0	0	0	0	0	0	0	0	0	0	0	0	0	0	0	0	0	0	0	0	0	0	0	0	0	0	0	0	0	0	0	0	0	0	0	0	0	0	0	0	0	0	0	0	0
Q13825	Methylglutaconyl-CoA hydratase, mitochondrial	AUH	AUH	2.43772e+06	1.6766e+06	3.14138e+06	4.01583e+06	4.06045e+06	0	8.46868e+06	4.42111e+06	2.89593e+07	4.12399e+06	3.85712e+06	0	2.89323e+06	3.15541e+06	4.11757e+06	2.65531e+06	3.58815e+06	1.39188e+06	0	7.39405e+06	9.28403e+06	9.00196e+06	3.85603e+06	1.01315e+06	3.98556e+06	5.04566e+06	5.87888e+06	2.80279e+06	2.0772e+06	0	0	4.56754e+06	3.02363e+06	2.84813e+06	2.95095e+06	1.12022e+06	1.69289e+06	1.95213e+06	1.73361e+06	4.68182e+06	7.73451e+06	1.08588e+06	1.75477e+06	3.29123e+06	2.97719e+06	1.65677e+06
Q96GD4	Aurora kinase B	AURKB	HEL-S-90;AURKA;AURKB;AURKC	5.9571e+06	1.52289e+07	1.50773e+07	1.55375e+07	1.58475e+07	1.24928e+07	1.66689e+07	1.05074e+07	1.08406e+07	1.3343e+07	1.48339e+07	1.01806e+07	1.38919e+07	1.46544e+07	9.89131e+06	0	8.22676e+06	1.08535e+07	1.06844e+07	16875636	1.29343e+07	1.4284e+07	2.56838e+07	8.87181e+06	1.72346e+07	1.93285e+07	2.1844e+07	1.05485e+07	1.05022e+07	1.01932e+07	8.44629e+06	9.47112e+06	1.49757e+07	6.5658e+06	1.19056e+07	1.06222e+07	9.44066e+06	1.24538e+07	1.21029e+07	1.18108e+07	9.27803e+06	8.60582e+06	5.88777e+06	8.43502e+06	8.77014e+06	7.91817e+06
O75366	Advillin	AVIL	AVIL	6.24277e+06	2.18758e+07	1.02391e+07	1.99377e+07	1.80361e+07	1.33196e+07	2.61722e+07	2.22817e+07	1.82847e+07	1.79147e+07	2.31636e+07	1.21398e+07	1.65868e+07	1.76011e+07	2.29545e+07	1.91382e+07	1.48541e+07	2.31583e+07	1.23316e+07	3.5522e+07	2.28639e+07	3.7628e+07	5.17975e+06	2.15887e+07	5.21031e+06	2.02429e+07	1.71011e+07	1.68328e+07	3.18365e+07	2.50198e+07	8.24706e+06	2.10659e+07	2.46572e+07	8.76505e+06	1.33576e+07	1.80132e+07	2.09964e+07	2.20218e+07	3.69446e+07	2.02867e+07	1.56821e+07	1.26934e+07	1.8721e+07	6.60261e+06	1.13922e+07	8.05628e+06
P20160	Azurocidin	AZU1	AZU1	8.37412e+06	7.59812e+06	3.08483e+07	1.96292e+07	3.00065e+07	3.00149e+07	6.5875e+06	3.87758e+07	5.56669e+06	2.56377e+07	2.25864e+07	717899	1.5354e+07	8.1944e+06	3.14609e+07	2.35903e+07	2.61071e+07	1.78187e+07	1.89794e+07	4.24207e+07	2.43155e+07	2.6642e+07	1.95531e+08	2.75435e+07	6.04932e+07	5.02586e+07	3.50933e+07	2.72597e+07	1.84741e+06	48256817	1.01336e+08	2.00212e+07	1.67151e+07	9.04712e+07	9.4105e+06	1.62236e+07	4.41232e+07	1.88683e+08	971215	1.31449e+07	1.55568e+07	1.2849e+07	3.51772e+07	1.30793e+07	1.74799e+07	4.01282e+07
K7N5M4	Human nkt tcr beta chain	B2M	B2M;TRB;TRBC1;TRBC2	4.43923e+06	2.73933e+07	7.77182e+06	9.0125e+06	6.75818e+06	6.35675e+06	8.57271e+06	1.03887e+07	7.54956e+06	7.01568e+06	8.82203e+06	1.54136e+07	1.00651e+07	8.66293e+06	1.24447e+07	1.04694e+07	6.17092e+06	4.56314e+06	5.9498e+06	0	1.20118e+07	0	7.90645e+06	8.96149e+06	7.57533e+06	7.71699e+06	1.07369e+07	1.75635e+07	9.7745e+06	7.72797e+06	4.41479e+06	2.63969e+07	1.46858e+07	5.0056e+06	7.21889e+06	2.49153e+07	1.30819e+07	9.43835e+06	1.33611e+07	1.18726e+07	4.2302e+07	9.9184e+06	7.15955e+06	1.04437e+07	1.09099e+07	6.29161e+06
Q96L58	Beta-1,3-galactosyltransferase 6	B3GALT6	B3GALT6	3.19106e+06	1.13225e+06	1.36594e+06	5.0573e+06	1.06773e+06	3.73779e+06	658971	1.33005e+06	7.3098e+06	2.92598e+06	1.80571e+06	3.5099e+06	5.20528e+06	3.02346e+06	6.79243e+06	1.26547e+06	3.49982e+06	2.33738e+06	2.7026e+06	5.71715e+06	2.21516e+06	0	7.38971e+06	4.41005e+06	6.28754e+06	1.45298e+06	3.88551e+06	1.9162e+06	4.68053e+06	1.49403e+06	5.18237e+06	6.24566e+06	4.01776e+06	2.81909e+06	0	2.30302e+06	3.80837e+06	0	8.52387e+06	6.3816e+06	1.61345e+06	3.11416e+07	3.08257e+06	3.69061e+06	9.0761e+06	0
G3V150	Galactosylgalactosylxylosylprotein 3-beta-glucuronosyltransferase	B3GAT3	B3GAT3;GANAB	2.11426e+07	5.48031e+07	2.32472e+07	4.6557e+07	4.47946e+07	3.11976e+07	5.48103e+07	2.8731e+07	3.20572e+07	5.58035e+07	6.01081e+07	5.41295e+07	4.23958e+07	5.58276e+07	4.97177e+07	6.04733e+07	3.31106e+07	3.8088e+07	3.50291e+07	4.72491e+07	4.40364e+07	6.26239e+07	2.78544e+07	1.0164e+08	1.75705e+07	3.18905e+07	4.02776e+07	5.13682e+07	8.37009e+07	5.76569e+07	3.48656e+07	6.7706e+07	5.76105e+07	2.50458e+07	3.35531e+07	4.52112e+07	6.35502e+07	5.30099e+07	1.07559e+08	5.89329e+07	5.08309e+07	2.38611e+07	3.25363e+07	2.88194e+07	2.67826e+07	2.94804e+07
Q6Y288	Beta-1,3-glucosyltransferase	B3GLCT	B3GLCT	0	0	0	0	0	0	639618	0	0	0	0	0	0	0	0	0	0	0	0	814311	671361	798656	0	0	0	0	1.06654e+06	0	0	0	0	0	0	0	0	0	0	0	0	0	0	0	0	0	0	0
Q9Y2A9	N-acetyllactosaminide beta-1,3-N-acetylglucosaminyltransferase 3	B3GNT3	B3GNT3	0	0	0	0	0	0	0	0	0	0	0	0	0	0	0	0	0	0	0	0	0	0	0	767582	0	0	0	0	0	0	0	0	0	0	0	0	0	0	0	0	0	0	0	0	0	0
Q6ZMB0	Acetylgalactosaminyl-O-glycosyl-glycoprotein beta-1,3-N-acetylglucosaminyltransferase	B3GNT6	B3GNT6	0	0	0	0	0	0	0	0	0	0	0	1.38987e+06	0	495605	0	0	0	0	0	0	0	0	1.03831e+06	0	0	0	0	0	0	0	0	0	0	0	0	0	0	0	0	0	0	0	0	0	0	0
Q8NFL0	UDP-GlcNAc:betaGal beta-1,3-N-acetylglucosaminyltransferase 7	B3GNT7	B3GNT7	0	0	0	0	0	0	0	0	0	0	0	0	0	0	0	0	0	0	0	0	0	0	0	0	0	0	0	0	0	0	0	0	0	0	0	0	0	0	0	732838	0	0	0	0	0	0
Q6L9W6	Beta-1,4-N-acetylgalactosaminyltransferase 3	B4GALNT3	B4GALNT3	0	3.89974e+06	1.23192e+07	1.31631e+07	1.12483e+07	8.27644e+06	1.00127e+07	8.33129e+06	7.46461e+06	3.61949e+06	9.72596e+06	4.67106e+06	1.46664e+07	1.4356e+07	7.71722e+06	4.31194e+06	3.04624e+06	579628	9.41305e+06	9813232	1.20567e+07	8.56647e+06	3.11221e+06	4.40008e+06	7.22717e+06	1.47358e+07	1.10717e+07	5.82462e+06	0	5.89208e+06	1.41414e+06	1.54179e+06	5.55216e+06	0	2.502e+06	3.08736e+06	1.49557e+06	445502	0	2.32802e+06	2.37116e+06	2.14232e+06	2.74737e+07	8.73361e+06	907135	3.62779e+06
D6RJI5	Beta-1,4-galactosyltransferase 7	B4GALT7	B4GALT7	0	0	0	0	0	0	0	0	530406	587256	0	0	0	0	0	0	0	0	0	497828	0	559000	550193	1.7318e+06	0	0	0	0	0	0	0	722455	0	0	0	0	0	0	427084	414087	0	0	0	0	0	0
F8W733	BRCA1-A complex subunit BRE (Fragment)	BABAM2	Hin-3;BABAM2	0	1.37811e+06	2.15187e+07	8.80406e+06	1.21933e+07	1.55767e+07	1.13572e+07	8.35836e+06	8.83778e+06	4.63841e+06	3.79154e+06	2.69489e+06	0	1.76957e+07	3.86654e+06	0	1.20931e+06	1.17866e+07	0	2.69205e+07	1.54786e+07	1.25382e+07	5.08159e+06	1.06419e+07	1.46358e+07	1.84538e+07	2.57535e+07	0	3.79047e+06	0	0	4.31871e+06	2.60628e+06	0	950099	3.11034e+06	1.31363e+06	1.04424e+06	0	0	6.62619e+06	3.55208e+06	0	1.97868e+06	0	0
A0A024R562	BCL2-antagonist of cell death, isoform CRA_c	BAD	BAD	5.39206e+06	3.18397e+06	4.36199e+06	2.15653e+06	0	1.8041e+06	0	0	0	1.89662e+06	0	0	6.47984e+06	0	5.21572e+06	0	0	0	0	0	1.18267e+06	8.75365e+06	0	1.80276e+06	1.02999e+06	0	0	8.85505e+06	4.13381e+07	1.40213e+07	0	1.09293e+07	0	5.98305e+06	8.13429e+06	7.64223e+06	0	1.27162e+07	3.7592e+07	1.13012e+07	588173	4.91203e+06	1.13279e+06	4.92608e+06	5.48953e+06	4.59775e+06
Q6FI97	BAF53A protein	BAF53A	BAF53A;ACTL6A;ACTL6B	1.64702e+07	3.61861e+07	1.73773e+07	2.67726e+07	2.46323e+07	2.33569e+07	4.67599e+07	3.35207e+07	2.55992e+07	4.47212e+07	2.66263e+07	4.24314e+07	1.1745e+07	2.79942e+07	2.67547e+07	6.38095e+07	2.1274e+07	2.48206e+07	2.50236e+07	3.97919e+07	3.45581e+07	4.34481e+07	3.20842e+07	3.40004e+07	2.75924e+07	1.94493e+07	2.49366e+07	2.46024e+07	1.1734e+08	2.31071e+07	1.77168e+07	4.00539e+07	4.77177e+07	7.95721e+06	2.42884e+07	1.87123e+07	2.09347e+07	3.00434e+07	3.58037e+07	2.14838e+07	2.35188e+07	1.362e+07	2.00025e+07	1.78306e+07	2.81021e+07	1.05622e+07
Q99933	BAG family molecular chaperone regulator 1	BAG1	BAG1	0	848509	3.30196e+06	8.62094e+06	6.84558e+06	5.55209e+06	5.9836e+06	5.18881e+06	5.11226e+06	5.62577e+06	4.66894e+06	2.52597e+06	0	7.58381e+06	1.27937e+06	6.601e+06	0	6.26189e+06	1.38321e+06	4.3752e+06	5.23189e+06	1.56123e+06	4.35789e+06	0	4.94929e+06	5.6094e+06	1.26549e+07	2.09719e+06	1.58353e+07	3.20466e+06	0	0	2.95575e+06	0	0	4.16838e+06	2.19873e+06	3.89453e+06	3.46957e+06	1.56617e+06	2.71854e+06	0	6.29101e+06	6.1436e+06	4.6613e+06	0
O95816	BAG family molecular chaperone regulator 2	BAG2	BAG2	0	1.02357e+07	7.70168e+06	8.47313e+06	9.59237e+06	8.37729e+06	1.19708e+07	10698505	2.23288e+06	2.00422e+07	1.01268e+07	1.1934e+07	9.67841e+06	1.79794e+07	7.14929e+06	9.91746e+06	1.5054e+06	1.32983e+07	5.85336e+06	2.40675e+07	1.39352e+07	1.10079e+07	2.02813e+07	8.52319e+06	7.35964e+06	1.16734e+07	9.01238e+06	1.76165e+07	1.68001e+07	6.76593e+06	6.08135e+06	5.13288e+06	2.5631e+07	3.53896e+06	2.27368e+07	1.07565e+07	1.62758e+07	6.78531e+06	2.30628e+07	1.06521e+07	1.32354e+07	7.75845e+06	1.91201e+06	5.27648e+06	1.99924e+07	0
O95817	BAG family molecular chaperone regulator 3	BAG3	BAG3	1.50323e+07	5.20827e+07	4.94521e+07	6.29263e+07	6.41153e+07	5.60755e+07	5.75657e+07	1.17699e+08	6.36785e+07	7.0868e+07	5.24625e+07	4.05517e+07	2.94024e+07	4.63888e+07	5.42339e+07	4.34878e+07	4.26341e+07	4.16771e+07	4.62622e+07	85610891	5.81611e+07	6.7041e+07	4.01255e+07	4.71603e+07	4.7087e+07	5.98209e+07	1.81687e+08	3.43202e+07	4.05971e+07	3.56889e+07	2.20498e+07	4.18404e+07	4.29735e+07	2.41655e+07	2.57611e+07	2.80539e+07	3.73116e+07	4.47722e+07	4.72064e+07	2.45979e+07	3.50398e+07	2.27979e+07	1.96982e+07	1.20235e+07	3.22778e+07	2.18827e+07
A0A024R6M6	BCL2-associated athanogene 5	BAG5	BAG5	0	2.45728e+07	1.02963e+07	6.39302e+06	3.86111e+06	7.2557e+06	7.20939e+06	1.86845e+07	1.23726e+06	4.36636e+06	4.63999e+06	1.14449e+07	2.57011e+06	4.03134e+06	0	5.46749e+06	2.82619e+06	3.16158e+06	0	5.05468e+06	0	0	3.30824e+06	5.37628e+06	2.72836e+06	1.29821e+07	0	0	7.05449e+06	2.16422e+06	3.51285e+06	4.03214e+06	2.07078e+06	4.15164e+06	1.65468e+06	2.04924e+07	3.50539e+06	853390	0	0	2.39028e+06	1.57336e+06	1.06973e+07	0	0	0
A0A024RCR6	BCL2-associated athanogene 6	BAG6	BAG6	5.97031e+07	137512249	4.78554e+07	8.62832e+07	6.90219e+07	7.99681e+07	8.33105e+07	4.79605e+07	1.07733e+08	140640690	1.08132e+08	1.42587e+08	5.49863e+07	6.90237e+07	8.51604e+07	1.65761e+08	1.35045e+08	1.13334e+08	5.45574e+07	1.28505e+08	6.60521e+07	9.91821e+07	1.99999e+08	2.00256e+08	5.30888e+07	6.69684e+07	6.51113e+07	1.43448e+08	1.74682e+08	8.65064e+07	4.76215e+07	1.8478e+08	1.48678e+08	3.89867e+07	6.1994e+07	1.31382e+08	8.01222e+07	1.57571e+08	1.56012e+08	8.22405e+07	9.78847e+07	4.38869e+07	4.55294e+07	2.80966e+07	4.08002e+07	3.66011e+07
Q9UQB8	Brain-specific angiogenesis inhibitor 1-associated protein 2	BAIAP2	BAIAP2	1.24496e+08	4.05073e+07	226198526	1.28688e+08	156297174	1.70748e+08	1.05637e+08	1.02883e+08	6.0465e+07	6.6214e+07	5.33769e+07	6.83989e+07	5.18087e+07	9.78544e+07	8.44135e+07	5.66408e+07	8.52798e+07	8.61123e+07	120548031	9.30529e+07	1.44652e+08	9.44308e+07	7.67137e+07	4.29134e+07	3.52254e+08	1.75261e+08	3.10393e+08	4.42142e+07	3.78442e+07	5.58504e+07	8.36446e+07	5.19748e+07	5.12803e+07	1.13208e+08	4.4219e+07	4.84358e+07	40194604	2.52829e+07	4.15057e+07	4.01455e+07	5.10716e+07	1.04792e+08	6.63797e+07	1.46655e+08	5.81832e+07	5.74956e+07
Q9UHR4	Brain-specific angiogenesis inhibitor 1-associated protein 2-like protein 1	BAIAP2L1	BAIAP2L1	1.00507e+06	9.50685e+06	4.8402e+06	7.83881e+06	8.8356e+06	6.37428e+06	1.10239e+07	4.38988e+06	7.72363e+06	2.37458e+06	9.84035e+06	1.45314e+07	6.63081e+06	2.53178e+06	5.62284e+06	8.67512e+06	3.38861e+06	1.06118e+07	4.51095e+06	8.98074e+06	1.19751e+06	2.40133e+06	9.02664e+06	9.56391e+06	3.7726e+06	4.63384e+06	5.59711e+06	4.88046e+06	1.70435e+07	8.77082e+06	4.03216e+06	1.30644e+07	1.3083e+06	3.70686e+06	5.74858e+06	5.50396e+06	7.79319e+06	5.46177e+06	1.57506e+07	8.09707e+06	2.57663e+06	3.27894e+06	4.04613e+07	0	1.45012e+06	2.25338e+06
A0A024R5H0	Barrier to autointegration factor 1, isoform CRA_a	BANF1	BANF1	5.44913e+07	1.26058e+08	9.43837e+07	1.20584e+08	197750416	6.36373e+07	1.32659e+08	1.26003e+08	1.0069e+08	1.48459e+08	9.91714e+07	1.25789e+08	7.5937e+07	9.62423e+07	9.63684e+07	1.40311e+08	9.80714e+07	138331464	7.17493e+07	1.0032e+08	7.45263e+07	8.76724e+07	8.54226e+07	1.18049e+08	5.4222e+07	7.37891e+07	6.80563e+07	8.52402e+07	182811992	9.13682e+07	6.36825e+07	8.15053e+07	112017002	3.76086e+07	6.60122e+07	8.98197e+07	9.98335e+07	113241142	1.33336e+08	8.72023e+07	105008397	2.28319e+07	3.11375e+07	5.50714e+07	4.82549e+07	4.60155e+07
P80723	Brain acid soluble protein 1	BASP1	BASP1	3.08701e+07	1.02255e+08	1.28925e+07	5.37198e+07	5.56257e+07	4.60313e+07	7.12691e+07	7.01675e+07	4.52488e+07	68190211	5.4051e+07	1.19001e+08	8.63605e+07	6.16916e+07	7.72281e+07	6.57681e+07	3.61845e+07	3.33641e+07	5.2674e+07	48814025	5.2938e+07	9.51836e+07	3.94453e+07	3.9466e+07	2.23193e+07	4.6995e+07	4.62501e+07	8.32559e+07	7.01312e+07	1.02023e+08	4.97431e+07	1.56973e+07	1.58664e+08	4.07374e+07	7.25197e+07	6.50828e+07	8.43432e+07	1.19299e+08	1.40256e+08	117238343	5.57601e+07	3.5836e+07	6.25127e+06	1.54114e+07	3.56759e+07	3.95596e+07
Q07812	Apoptosis regulator BAX	BAX	Bax;BAX	2.2487e+07	3.7163e+07	4.25204e+07	6.04888e+07	9.53695e+07	5.82423e+07	6.11223e+07	4.89861e+07	6.28875e+07	4.8302e+07	6.32586e+07	2.41091e+07	3.71239e+07	4.44792e+07	4.89936e+07	5.52943e+07	4.10714e+07	3.61279e+07	3.96019e+07	6.37967e+07	3.39907e+07	3.9089e+07	4.74051e+07	2.72842e+07	3.03e+07	5.37602e+07	6.57572e+07	4.46712e+07	5.75237e+07	4.71332e+07	1.55777e+07	4.70043e+07	5.46149e+07	4.15109e+07	4.39212e+07	2.76619e+07	3.4879e+07	4.463e+07	6.48958e+07	2.91628e+07	4.62566e+07	2.69067e+07	2.00801e+07	2.43707e+07	2.43367e+07	2.2831e+07
Q9NRL2	Bromodomain adjacent to zinc finger domain protein 1A	BAZ1A	BAZ1A	0	0	0	0	0	0	0	0	0	0	0	0	0	0	0	0	0	0	0	833511	0	0	0	0	0	0	0	0	2.07015e+06	0	0	0	0	0	0	0	0	0	0	0	0	0	0	0	0	0
Q9UIG0	Tyrosine-protein kinase BAZ1B	BAZ1B	BAZ1B	2.10743e+08	4.0633e+07	7.74579e+07	2.90969e+07	2.81829e+07	7.23194e+07	3.4311e+07	7.97758e+07	8.48819e+07	5.69193e+07	2.83243e+07	8.03216e+07	6.15303e+07	6.7039e+07	4.84473e+07	5.14132e+07	9.12904e+07	1.01387e+08	9.73374e+07	35382746	5.24736e+07	3.77104e+07	1.39979e+08	2.91519e+07	1.04836e+08	5.10809e+07	2.3736e+07	5.94295e+07	8.76692e+07	5.26689e+07	1.42852e+08	5.49517e+07	5.84521e+07	2.15481e+08	1.64012e+08	7.84266e+07	3.18157e+07	2.64212e+07	3.70605e+07	7.65449e+07	5.10233e+07	1.17264e+08	67425892	1.2827e+08	1.20746e+08	8.29203e+07
J3KPG5	Bromodomain adjacent to zinc finger domain protein 2A	BAZ2A	BAZ2A	0	4.01727e+06	1.35222e+06	1.91946e+06	1.86639e+06	1.707e+06	2.90261e+06	0	0	5.39656e+06	3.46526e+06	3.67689e+06	2.34429e+06	2.24702e+06	4.42247e+06	4.13241e+06	3.86154e+06	6.60399e+06	3.42114e+06	8753813	2.91602e+06	4.60761e+06	8.36177e+06	3.23015e+06	0	3.40559e+06	2.83301e+06	0	4.57685e+06	1.71838e+06	1.83567e+06	6.62192e+06	4.34648e+06	0	1.51348e+06	3.54037e+06	2.5854e+06	4.24386e+06	4.13433e+06	3.3352e+06	5.05778e+06	2.633e+06	2.83151e+06	0	2.86979e+06	0
O75936	Gamma-butyrobetaine dioxygenase	BBOX1	BBOX1	798310	2.29406e+06	1.54353e+06	5.4515e+06	1.65158e+06	1.02056e+06	1.19473e+06	1.72845e+06	1.14792e+06	2.91823e+06	2.02559e+06	3.24554e+06	839379	1.93275e+06	1.88064e+06	1.56373e+06	1.16731e+06	1.96792e+06	855709	2.20074e+06	2.32943e+06	1.43904e+06	1.35407e+06	988224	933484	1.27264e+06	1.77129e+06	2.00944e+06	937600	1.34848e+06	0	1.43647e+06	1.42775e+06	495925	2.85618e+06	1.42204e+06	4.01566e+06	1.24483e+06	0	1.1977e+06	1.39173e+06	983739	538209	1.02471e+06	502044	496742
P50895	Basal cell adhesion molecule	BCAM	LU;BCAM	1.83569e+08	2.70715e+07	3.11121e+08	2.84861e+08	282571515	3.29603e+08	1.59948e+08	1.24451e+08	9.76169e+07	5.00307e+07	2.09347e+07	4.04803e+07	7.56356e+07	1.06734e+08	1.41487e+08	1.14932e+08	1.5022e+08	1.09269e+08	2.62627e+08	8.47197e+07	158162424	9.42751e+07	4.23848e+07	9.12307e+07	4.74406e+08	3.26751e+08	4.8268e+08	8.22405e+07	8.03473e+07	7.60148e+07	6.44822e+07	7.7767e+07	5.14277e+07	126266492	6.91437e+07	2.18411e+07	5.45518e+07	3.0048e+07	2.90533e+07	3.49613e+07	6.54199e+07	2.59931e+08	8.11787e+07	2.29913e+08	1.57269e+08	1.05313e+08
A0A172M5V3	Basal cell adhesion molecule Lutheran blood group (Fragment)	BCAM	BCAM;LU	1.77043e+06	1.47829e+07	3.69155e+06	5.48047e+06	7.71336e+06	5.12407e+06	7.43734e+06	4.7101e+06	6.20043e+06	1.57059e+07	1.16638e+07	5.63368e+06	5.6028e+06	8.34703e+06	1.08568e+07	5.94961e+06	3.77147e+06	1.07987e+07	5.23548e+06	15926129	5.51217e+06	1.68944e+07	1.47307e+07	1.51638e+07	3.2543e+06	4.64573e+06	5.11703e+06	1.13124e+07	6.99083e+06	7.30362e+06	6.56581e+06	8.68378e+06	8.31629e+06	6.36607e+06	6.00973e+06	8.36979e+06	7.83431e+06	1.29089e+07	1.08256e+07	9.82505e+06	7.95768e+06	3.06029e+06	8.5311e+06	2.87769e+06	4.0403e+06	6.20363e+06
A4D0R4	B-cell receptor-associated protein	BCAP29	DUS4L-BCAP29;BCAP29	5.09739e+06	5.84318e+06	9.53324e+06	8.80545e+06	7.53018e+06	7.74442e+06	1.21052e+07	9.54399e+06	9.32493e+06	3.37857e+06	7.16975e+06	3.11172e+06	3.04093e+07	1.99338e+07	1.9384e+06	9.94245e+06	6.50525e+06	7.87195e+06	7.23149e+06	1.15393e+07	5.72234e+06	4.11647e+06	1.24054e+06	7.97186e+06	7.15557e+06	7.3873e+06	1.04943e+07	1.09381e+07	2.89316e+06	1.18403e+07	1.56914e+07	6.32375e+06	1.25735e+07	1.3655e+07	1.82092e+07	8.37917e+06	8.52164e+06	1.13267e+07	1.68651e+07	1.10274e+07	1.05779e+07	7.70928e+06	1.67746e+06	1.01394e+07	1.26965e+07	2.49584e+07
D3DUK1	Breast cancer anti-estrogen resistance 1, isoform CRA_a	BCAR1	BCAR1	4.3273e+06	7.15429e+06	6.67306e+06	9.33988e+06	6.04299e+06	6.1243e+06	1.39389e+07	6.2901e+06	1.78383e+07	1.18753e+07	1.63309e+07	1.83124e+07	4.85764e+06	7.86977e+06	1.045e+07	2.81901e+06	1.83566e+07	8.64012e+06	6.6382e+06	7.83039e+06	6.59625e+06	1.3982e+07	1.17501e+07	1.73583e+07	2.76302e+06	1.35309e+07	8.90205e+06	8.32339e+06	5.93152e+06	1.3253e+07	5.5612e+06	1.01656e+07	3.64593e+06	2.90801e+06	1.26364e+07	6.4433e+06	6.81886e+06	1.06892e+07	1.84897e+07	6.16167e+06	1.1555e+07	4.59979e+06	2.02536e+06	4.8631e+06	5.70918e+06	8.34999e+06
A0AVG7	Breast carcinoma amplified sequence 1	BCAS1	BCAS1	0	0	1.15155e+06	0	1.56741e+06	1.92073e+06	0	1.00388e+06	856839	568947	0	0	1.65134e+06	847076	388459	0	1.59107e+06	0	636307	0	0	774257	0	5.31959e+06	0	687286	1.03506e+06	996536	0	2.23336e+06	2.25235e+06	2.07779e+06	5.49823e+06	2.82212e+06	817776	1.65832e+06	2.19803e+06	2.24245e+06	1.07545e+06	0	2.69131e+06	0	1.33214e+06	0	0	2.95274e+06
B2R7W3	Pre-mRNA-splicing factor SPF27	BCAS2	BCAS2	3.26401e+07	5.18157e+07	1.23691e+08	7.19111e+07	8.06542e+07	8.82001e+07	7.1397e+07	7.25502e+07	6.85694e+07	5.23977e+07	4.08683e+07	9.01165e+07	6.81835e+07	9.08114e+07	7.00805e+07	5.30248e+07	8.7244e+07	5.20191e+07	8.47175e+07	3.66332e+07	8.96431e+07	8.14038e+07	2.78126e+08	3.49297e+07	1.3209e+08	5.71198e+07	5.64001e+07	4.44576e+07	5.36707e+07	4.14055e+07	9.60194e+07	4.10871e+07	6.61719e+07	8.43432e+07	9.21164e+07	1.03263e+08	5.14922e+07	5.35977e+07	4.51332e+07	9.5269e+07	5.40002e+07	6.77758e+07	2.0342e+08	6.51605e+07	8.87732e+07	1.23379e+08
A0A024RAV0	Branched-chain-amino-acid aminotransferase	BCAT1	BCAT1	4.89724e+07	4.11614e+07	1.34385e+07	2.61287e+07	1.47573e+07	2.72506e+07	2.09205e+07	3.05867e+07	20486332	4.39838e+07	2.04994e+07	1.97127e+07	8.98264e+06	2.5073e+07	2.57909e+07	2.46523e+07	2.54963e+07	4.04934e+07	3.23364e+07	4.78495e+07	3.71731e+07	2.37047e+07	4.8617e+07	2.14257e+07	2.6556e+07	1.8167e+07	2.11584e+07	4.07179e+07	3.19118e+07	1.43111e+07	6.64373e+07	2.97093e+07	3.16105e+07	1.4007e+08	2.56439e+07	2.31749e+07	2.89745e+07	2.70861e+07	4.80564e+07	1.45636e+07	2.92225e+07	1.29974e+07	3.76854e+07	3.24177e+07	2.89297e+07	3.07686e+07
M0QXF9	Branched-chain-amino-acid aminotransferase (Fragment)	BCAT2	BCAT2	2.44658e+07	6.39325e+07	5.62966e+07	1.5769e+08	9.07721e+07	5.37291e+07	1.17766e+08	7.4213e+07	8.24075e+07	6.24977e+07	8.06094e+07	5.35442e+07	3.21058e+07	8.1309e+07	4.95618e+07	6.17661e+07	7.91514e+07	6.59831e+07	5.87295e+07	7.5908e+07	6.12696e+07	6.0314e+07	3.56085e+07	6.86365e+07	4.17892e+07	7.06668e+07	6.97767e+07	3.37327e+07	7.2918e+07	5.4087e+07	5.58121e+07	5.35175e+07	6.36424e+07	3.15882e+07	4.17626e+07	3.33097e+07	4.58642e+07	4.05052e+07	4.78206e+07	5.06913e+07	5.7071e+07	2.67168e+07	2.32834e+07	2.58324e+07	3.7966e+07	2.6666e+07
Q9P287	BRCA2 and CDKN1A-interacting protein	BCCIP	BCCIP	2.25183e+06	0	1.15794e+06	1.78497e+06	3.24425e+06	4.30727e+06	0	1.87011e+06	3.48818e+06	5.72311e+06	1.58358e+06	2.42184e+06	1.27744e+06	1.62312e+06	0	2.51422e+06	1.91646e+06	4.43941e+06	0	8.47169e+06	2.08211e+06	4.7965e+06	4.12237e+06	5.34839e+06	3.21169e+06	1.06974e+06	2.17787e+06	2.17449e+06	3.19101e+07	1.30597e+06	935496	2.50316e+06	2.10882e+06	0	2.10188e+06	1.70598e+06	1.01145e+06	8.80755e+06	8.25002e+06	2.03369e+06	3.28287e+06	3.3932e+06	0	2.08035e+06	1.86212e+06	0
P06276	Cholinesterase	BCHE	BCHE	2.45178e+06	0	2.61597e+06	1.14492e+06	2.06871e+06	2.64058e+06	1.86574e+06	0	536704	0	882101	426772	1.37016e+06	0	0	1.76288e+06	0	0	0	3.01258e+06	0	0	2.44158e+06	2.29861e+06	1.12726e+06	1.83284e+06	3.0631e+06	1.79123e+06	2.001e+06	0	1.49394e+06	615427	0	2.08299e+06	1.54259e+06	2.16904e+06	2.67099e+06	0	1.455e+06	1.88547e+06	463157	2.2739e+06	4.84464e+06	2.93949e+06	1.7e+06	878476
O14874	[3-methyl-2-oxobutanoate dehydrogenase [lipoamide]] kinase, mitochondrial	BCKDK	BCKDK	1.00486e+07	3.67314e+07	0	4.38694e+06	1.06073e+06	1.06667e+07	4.56263e+06	3.63119e+06	8.28018e+06	2.138e+07	1.35226e+07	1.41533e+07	4.90093e+06	8.9826e+06	8.17268e+06	1.13604e+07	8.58216e+06	1.14265e+07	6.72668e+06	4.52954e+06	3.66432e+06	4.63389e+06	5.322e+06	1.42238e+07	6.21589e+06	2.02091e+06	0	1.37769e+07	3.56151e+07	2.26362e+07	9.04482e+06	1.09945e+07	2.9902e+07	6.95245e+06	3.25411e+06	1.48078e+07	1.42046e+07	1.6439e+07	4.14295e+07	1.65396e+07	2.39082e+07	7.80682e+06	3.74437e+06	4.80494e+06	1.30376e+07	5.29271e+07
A0A087WWW9	B-cell lymphoma/leukemia 10	BCL10	BCL10	0	1.39535e+06	0	1.63553e+06	698023	2.72163e+06	1.7817e+06	0	1.02311e+06	1.12347e+06	0	3.17483e+06	974215	1.12171e+06	3.78928e+06	0	0	3.95669e+06	0	0	1.64004e+06	1.38328e+06	1.28157e+06	0	0	1.82817e+06	9.14446e+06	1.34974e+06	2.05486e+06	3.63075e+06	4.09236e+06	7.93722e+06	2.22819e+06	0	1.60796e+06	1.60778e+06	1.75362e+06	2.95293e+06	1.32293e+07	1.63692e+06	1.19355e+06	0	692262	0	3.70132e+06	0
Q5QP56	Apoptosis regulator Bcl-X (Fragment)	BCL2L1	BCL2L1	1.0602e+06	3.37902e+06	1.92631e+06	4.18834e+06	1.65949e+06	4.45875e+06	5.68339e+06	2.05268e+06	5.8147e+06	5.74946e+06	4.85846e+06	7.99375e+06	0	3.11916e+06	5.65691e+06	3.92819e+06	2.24741e+06	5.69196e+06	1.08951e+06	5089002	3.7227e+06	7.98106e+06	3.93284e+06	6.27742e+06	0	5.68365e+06	2.03784e+06	2.20421e+06	2.95167e+06	5.28862e+06	0	3.78731e+06	4.36858e+06	0	898123	1.30409e+06	5.62669e+06	4.69185e+06	8.63457e+06	2.8104e+06	1.78276e+06	0	1.52209e+06	0	2.05896e+06	682316
Q9BXK5	Bcl-2-like protein 13	BCL2L13	DKFZp451F173;BCL2L13	2.67089e+07	1.55563e+07	2.32988e+07	3.49591e+07	1.28732e+07	3.48265e+07	2.55971e+07	2.20608e+07	2.5633e+07	4.23714e+07	1.94702e+07	23719055	2.01402e+07	4.5338e+07	2.96757e+07	2.72549e+07	2.91455e+07	2.56968e+07	2.73022e+07	3.45374e+07	2.81974e+07	2.76212e+07	2.74095e+07	5.18551e+07	1.74414e+07	3.09559e+07	2.68868e+07	3.44711e+07	1.53214e+07	1.64192e+07	3.10786e+07	4.86572e+07	1.85142e+07	2.52103e+07	1.37039e+07	2.06809e+07	3.52539e+07	3.3373e+07	2.06469e+07	2.36125e+07	1.46929e+07	5.65405e+07	1.06113e+08	1.66121e+07	2.88088e+07	2.81071e+07
Q8WUZ0	B-cell CLL/lymphoma 7 protein family member C	BCL7C	BCL7C;BCL7B;BCL7A	1.24273e+06	0	0	0	2.64895e+06	1.02159e+06	2.24364e+06	4.02083e+06	0	1.98792e+06	2.07443e+06	2.23666e+06	0	0	0	7.86481e+06	0	0	0	3.39837e+06	0	0	0	1.76364e+06	0	0	0	1.7637e+07	695417	0	0	1.32348e+06	0	0	0	3.18973e+06	0	0	1.35395e+07	0	0	2.14851e+06	0	1.20037e+06	0	0
Q9NYF8	Bcl-2-associated transcription factor 1	BCLAF1	BCLAF1;THRAP3	1.49654e+07	5.13503e+07	2.44359e+07	5.48752e+07	5.5851e+07	4.5176e+07	4.96583e+07	3.82565e+07	4.24705e+07	5.9437e+07	4.77556e+07	5.15697e+07	2.02175e+07	2.61499e+07	3.58554e+07	6.31768e+07	3.27457e+07	5.43368e+07	2.17117e+07	4.70377e+07	3.20661e+07	5.54288e+07	4.47019e+07	6.15365e+07	2.91469e+07	5.19229e+07	5.06442e+07	2.45354e+07	1.23588e+08	3.63336e+07	1.8162e+07	4.56878e+07	5.42619e+07	5.63007e+06	2.20291e+07	2.4837e+07	3.66306e+07	3.68811e+07	1.06765e+08	2.66719e+07	2.33006e+07	1.24773e+07	1.51393e+07	1.972e+07	5.08732e+07	5.43789e+06
P11274	Breakpoint cluster region protein	BCR	BCR/ABL;ABR;BCR-ABL1;BCR	875302	1.76864e+06	0	2.68794e+06	2.8976e+06	854462	5.01706e+06	1.56188e+06	2.0406e+06	1.53969e+06	3.02904e+06	2.38033e+06	2.98532e+06	3.56351e+06	2.16387e+06	2.09634e+06	3.47001e+06	2.09658e+06	1.29051e+06	4.21751e+06	1.55131e+06	5.41867e+06	3.46861e+06	6.45958e+06	776958	1.64107e+06	852859	4.82005e+06	4.79932e+06	4.16772e+06	1.64699e+06	3.90051e+06	3.77331e+06	2.57444e+06	8.42726e+06	3.65933e+06	3.10182e+06	5.00788e+06	5.62794e+06	2.4971e+06	3.16124e+06	1.03824e+06	2.16149e+06	1.00849e+06	2.24645e+06	1.46679e+06
Q02338	D-beta-hydroxybutyrate dehydrogenase, mitochondrial	BDH1	BDH1	8.05355e+06	5.61921e+06	1.96002e+06	6.96401e+06	5.80673e+06	9.7175e+06	2.0761e+07	1.5333e+07	4.24241e+06	6.74413e+06	1.38632e+07	5.52551e+06	4.04244e+06	1.13834e+07	4.97194e+06	1.34177e+07	1.87752e+07	2.37909e+07	1.48909e+07	1.34951e+07	1.05838e+07	1.71911e+07	6.83963e+06	1.04858e+07	1.93306e+06	7.5256e+06	1.19699e+07	5.21744e+06	1.56957e+07	8.94256e+06	2.29744e+07	1.70962e+07	5.56116e+06	7.83249e+06	1.60318e+07	0	1.09772e+06	9.81018e+06	1.06897e+07	4.10249e+06	5.42288e+06	9.00737e+06	8.7413e+06	2.51031e+06	5.08282e+06	1.17134e+06
Q9BUT1	3-hydroxybutyrate dehydrogenase type 2	BDH2	SLC9B2;BDH2	4.54529e+07	7.89779e+07	6.21339e+07	7.72404e+07	7.58463e+07	5.90281e+07	8.83248e+07	5.49589e+07	6.33565e+07	8.08505e+07	7.74052e+07	6.89348e+07	4.78893e+07	9.84557e+07	6.24677e+07	6.90436e+07	4.25111e+07	8.06846e+07	3.2911e+07	1.0472e+08	5.65288e+07	7.30085e+07	1.09178e+08	5.86587e+07	8.78747e+07	9.03321e+07	8.55203e+07	6.26152e+07	3.73919e+07	4.64405e+07	5.03158e+07	7.19105e+07	7.73658e+07	3.87209e+07	5.35162e+07	5.19715e+07	5.31019e+07	5.2387e+07	7.09515e+07	5.71094e+07	9.15338e+07	6.64333e+07	7.33488e+07	4.8783e+07	5.53086e+07	4.28293e+07
H7C1N3	BET1 homolog (Fragment)	BET1	BET1	0	8.31809e+06	8.72745e+06	3.60132e+06	1.59951e+07	7.45965e+06	7.16523e+06	1.30699e+07	0	8.24771e+06	6.44615e+06	1.00744e+06	7.51283e+06	6.19543e+06	4.72027e+06	7.48214e+06	0	6.87103e+06	0	8.30441e+06	6.46163e+06	1.50534e+07	7.10485e+06	4.38585e+06	2.14093e+06	5.01057e+06	2.36145e+06	7.89068e+06	8.81575e+06	9.2567e+06	2.38903e+07	4.74211e+06	6.18221e+06	2.04626e+06	8.40041e+06	4.17336e+06	4.23918e+06	1.99375e+07	7.3638e+06	8.23529e+06	1.17551e+06	0	3.16913e+06	0	3.08097e+06	3.06524e+06
E9PHY4	BET1-like protein	BET1L	BET1L	0	1.35775e+06	911948	1.39766e+06	1.01383e+06	1.30432e+06	0	2.06326e+06	1.94842e+06	2.62281e+06	1.76258e+06	1.30337e+06	872255	1.76349e+06	1.78595e+06	2.44773e+06	1.79102e+06	2.19715e+06	711093	1.63025e+06	0	3.67614e+06	2.58716e+06	3.60997e+06	0	1.25594e+06	1.44608e+06	617434	0	0	985202	1.01675e+06	671455	0	1.22843e+06	0	824793	1.39412e+06	1.05449e+06	769575	1.51125e+06	0	2.45291e+06	0	1.59458e+06	0
Q9UM85	Beta-globin protein (Fragment)	beta-globin	HBD;HBG2;HBG1;HBB;beta-globin;HBE1	9.16325e+06	2.29603e+06	7.34923e+06	3.36442e+06	3.51911e+06	6.46464e+06	2.81558e+06	6.75908e+06	8.31968e+06	3.14013e+06	3.12966e+06	6.29023e+06	3.40806e+06	5.5904e+06	9.03723e+06	4.89802e+06	1.11167e+07	1.5881e+07	1.36478e+07	6.4011e+06	9.01922e+06	4.05351e+06	1.48079e+07	1.52815e+06	2.56997e+07	1.05179e+07	4.69289e+06	3.86765e+06	1.12701e+06	3.82102e+06	1.27745e+07	4.28601e+06	2.32933e+06	1.42289e+07	4.62095e+06	4.61314e+06	2.04197e+06	0	0	5.36904e+06	4.46675e+06	1.36036e+07	7.68253e+06	1.35393e+07	1.64808e+07	3.09557e+06
C9JKG1	Biglycan (Fragment)	BGN	BGN	6.70987e+07	1.89858e+08	5.9955e+07	6.67458e+07	8.45573e+07	8.872e+07	1.30563e+08	1.02935e+08	1.44811e+08	1.49171e+08	1.89757e+08	1.00254e+08	1.15854e+08	1.17819e+08	1.54652e+08	1.55037e+08	9.5295e+07	1.44552e+08	8.6224e+07	189904556	1.06617e+08	1.68495e+08	5.088e+07	2.304e+08	3.98898e+07	1.23859e+08	6.5582e+07	1.54011e+08	2.99328e+08	1.30106e+08	9.12317e+07	2.02181e+08	2.27372e+08	6.56352e+07	1.33697e+08	1.40137e+08	1.86633e+08	1.78065e+08	2.22358e+08	176499413	1.5436e+08	9.27231e+07	1.46167e+08	8.43449e+07	158741858	8.33826e+07
Q8TD16	Protein bicaudal D homolog 2	BICD2	BICD2	2.14409e+07	3.92466e+07	5.39717e+07	6.29606e+07	6.39822e+07	4.36298e+07	5.71818e+07	4.28549e+07	3.32607e+07	3.86939e+07	6.30775e+07	4.26417e+07	5.04798e+07	7.89438e+07	4.96117e+07	4.61218e+07	3.22827e+07	5.78088e+07	7.33391e+07	5.6149e+07	5.65921e+07	5.63731e+07	3.84365e+07	3.35964e+07	5.62921e+07	7.11177e+07	9.93357e+07	3.82007e+07	1.9532e+07	3.58608e+07	2.55311e+07	3.52197e+07	4.78047e+07	2.48007e+07	3.55781e+07	3.31137e+07	2.93948e+07	5.63408e+07	6.01415e+07	3.47713e+07	2.83836e+07	3.76021e+07	2.61138e+07	5.67788e+07	2.93191e+07	2.73143e+07
Q9UBW5	Bridging integrator 2	BIN2	AMPH;BIN1;BIN2	0	6.82522e+06	5.11494e+06	6.3102e+06	6.51938e+06	5.1456e+06	5.74757e+06	3.7153e+06	3.7766e+06	3.74523e+06	9.39425e+06	1.8735e+06	3.07751e+06	6.7298e+06	3.03446e+06	5.01791e+06	3.49264e+06	3.38068e+06	3.05549e+06	1.42961e+07	7.37191e+06	1.58321e+07	1.09214e+07	5.28538e+06	3.12391e+06	8.21772e+06	9.77425e+06	3.55156e+06	2.94596e+06	9.71866e+06	0	4.28714e+06	5.66645e+06	0	4.37667e+06	6.23664e+06	8.16133e+06	2.01389e+07	2.32075e+07	6.46589e+06	1.17993e+06	0	5.77197e+06	0	582109	0
Q9NQY0	Bridging integrator 3	BIN3	BIN3	0	0	0	0	0	1.28165e+06	1.47841e+06	0	0	588678	0	0	0	1.04824e+06	0	578097	962906	1.88936e+06	953970	0	0	0	0	0	0	0	0	0	996363	0	2.37878e+06	0	0	0	0	0	0	0	0	0	0	0	0	0	0	1.13101e+06
A0A3B3IUB9	Baculoviral IAP repeat-containing protein 6 (Fragment)	BIRC6	BIRC6	0	4.0864e+06	1.71708e+07	1.13202e+07	8.46867e+06	8.07759e+06	5.6637e+06	8.23999e+06	5.01009e+06	2.92931e+06	5.0295e+06	5.4157e+06	6.3165e+06	4.40397e+06	8.0028e+06	7.94241e+06	7.79187e+06	5.32843e+06	7.39981e+06	7.17211e+06	1.84267e+07	1.3102e+07	8.48694e+06	8.6682e+06	2.21721e+07	1.29597e+07	2.16247e+07	4.12977e+06	3.70247e+06	7.27628e+06	5.45872e+06	7.73558e+06	5.16334e+06	6.44164e+06	7.03843e+06	5.57424e+06	5.46266e+06	5.10545e+06	4.49008e+06	5.44508e+06	9.48162e+06	1.03276e+07	3.83948e+06	1.46766e+07	1.37703e+07	4.92825e+06
Q13867	Bleomycin hydrolase	BLMH	BLMH	1.1704e+07	1.86588e+07	8.15624e+06	8.21656e+06	1.06754e+07	658650	1.72592e+07	9.87266e+06	1.08299e+07	2.20173e+07	1.33354e+07	1.04586e+07	1.9025e+07	1.00534e+07	1.49096e+07	1.94681e+07	9.62153e+06	2.71309e+07	1.63935e+07	1.50571e+07	2.47518e+07	2.0538e+07	2.15504e+06	1.99717e+07	1.25167e+07	1.45575e+07	1.41814e+07	1.37385e+07	3.65309e+07	1.81001e+07	9.15437e+06	16129717	3.00206e+07	8.99703e+06	1.40206e+07	1.20421e+07	1.43383e+07	1.71923e+07	3.65913e+07	1.62359e+07	2.18356e+07	1.06029e+07	1.15211e+07	1.09128e+07	8.78124e+06	1.65971e+07
P78537	Biogenesis of lysosome-related organelles complex 1 subunit 1	BLOC1S1	BLOC1S1	2.80102e+06	5.78138e+06	4.24814e+06	1.26546e+07	9.57142e+06	2.39585e+06	9.2492e+06	3.9704e+06	5.94135e+06	6.04003e+06	5.74338e+06	8.66601e+06	3.75524e+06	5.03923e+06	3.60082e+06	4.54196e+06	3.89124e+06	5.55087e+06	1.14126e+07	2.86731e+06	4.25139e+06	4.6688e+06	4.34462e+06	6.97771e+06	919994	2.69274e+06	7.00941e+06	5.50044e+06	6.61825e+06	4.96525e+06	1.47215e+06	8.50991e+06	7.74049e+06	3.8278e+06	4.68326e+06	5.50699e+06	7.03683e+06	6.57502e+06	9.11804e+06	6.28824e+06	5.74659e+06	2.94634e+06	3.53061e+06	2.96917e+06	2.17864e+06	7.70548e+06
Q6QNY1	Biogenesis of lysosome-related organelles complex 1 subunit 2	BLOC1S2	BLOC1S2	2.48921e+06	5.16231e+06	3.63973e+06	6.91389e+06	5.85803e+06	4.28063e+06	8.70692e+06	1.08781e+07	2.99609e+06	5.04853e+06	7.3788e+06	3.04886e+06	1.20654e+07	8.21889e+06	2.13243e+07	5.60284e+06	3.3638e+06	1.19272e+07	9.27088e+06	2.86891e+06	12351246	7.2983e+06	7.62222e+06	6.81959e+06	3.3876e+06	7.96861e+06	9.86103e+06	1.28634e+07	2.32151e+06	1.55939e+07	4.43033e+07	5.62425e+06	6.42614e+06	2.30915e+07	6.69842e+06	6.19662e+06	1.52783e+07	9.06377e+06	1.03787e+07	6.42054e+06	9.70615e+06	6.30229e+06	8.81079e+06	1.50641e+07	647670	1.57172e+07
Q6QNY0	Biogenesis of lysosome-related organelles complex 1 subunit 3	BLOC1S3	BLOC1S3	0	1.63494e+06	0	5.4942e+06	6.94935e+06	3.66281e+06	2.65314e+06	4.50234e+06	3.85674e+06	4.30716e+06	1.42158e+06	2.24675e+06	1.53329e+06	4.0745e+06	3.50384e+06	6.07807e+06	1.05128e+06	2.59948e+06	1.04236e+06	5.06888e+06	0	3.44587e+06	3.57777e+06	6.95694e+06	2.16165e+06	4.8054e+06	5.43549e+06	4.80564e+06	4.32099e+06	1.31244e+06	0	3.06541e+06	5.21094e+06	0	8.11442e+06	2.07126e+06	1.51885e+06	4.95429e+06	8.56984e+06	1.23311e+06	4.48076e+06	0	1.80172e+06	0	1.20609e+06	795283
Q9NUP1	Biogenesis of lysosome-related organelles complex 1 subunit 4	BLOC1S4	BLOC1S4	4.56717e+06	8.6492e+06	1.24797e+07	1.50717e+07	1.88082e+06	1.36854e+07	2.80627e+06	2.53271e+06	1.27627e+07	9.9763e+06	5.87034e+06	6.62264e+06	1.01516e+07	5.60311e+06	3.01428e+06	5.26779e+06	6.35417e+06	3.73208e+06	1.2835e+07	1.12593e+07	4.73074e+06	4.69686e+06	4.59068e+06	1.01317e+07	1.41005e+07	2.00575e+07	2.84051e+07	7.10467e+06	6.60763e+06	3.81042e+06	6.59512e+06	9.63093e+06	9.23039e+06	4.08513e+06	8.63428e+06	5.50228e+06	4.45134e+06	4.63248e+06	5.88325e+06	7.57087e+06	9.47921e+06	5.97256e+06	1.68838e+06	1.35776e+07	3.05114e+06	1.70892e+06
Q8TDH9	Biogenesis of lysosome-related organelles complex 1 subunit 5	BLOC1S5	BLOC1S5;BLOC1S5-TXNDC5	1.14578e+07	9.60161e+06	1.13402e+06	6.4471e+06	5.98719e+06	4.2589e+06	1.05983e+07	3.85185e+06	5.94023e+06	5.57679e+06	4.4162e+06	7.48814e+06	1.22406e+07	1.22256e+07	9.62004e+06	5.16368e+06	9.55642e+06	1.47072e+07	6.60458e+06	2.82039e+06	3.06833e+06	3.90325e+06	4.04461e+06	4.79441e+06	2.3006e+06	5.38421e+06	4.84279e+06	1.00999e+07	1.69509e+07	5.94443e+06	7.94704e+06	6.74077e+06	9.30225e+06	1.46205e+07	2.39662e+06	8.0513e+06	1.12729e+07	1.57849e+07	8.66534e+06	9.78374e+06	7.32154e+06	1.43462e+06	6.17789e+06	7.62576e+06	0	5.50606e+06
H3BN13	Biogenesis of lysosome-related organelles complex 1 subunit 6	BLOC1S6	BLOC1S6	0	0	0	0	4.32405e+06	3.58666e+06	0	1.77388e+06	0	1.61751e+06	1.93667e+06	0	3.88077e+06	0	0	0	2.96166e+06	0	0	3.68005e+06	4.41311e+06	3.75585e+06	3.52251e+06	0	3.00028e+06	3.38191e+06	0	0	0	0	0	0	0	0	0	0	3.53519e+06	0	1.38169e+06	0	2.36308e+06	0	1.73562e+06	0	0	0
P30043	Flavin reductase (NADPH)	BLVRB	BLVRB	9.58701e+08	5.05785e+08	7.09552e+08	6.25111e+08	3.70195e+08	5.49381e+08	3.31574e+08	5.25154e+08	638763019	5.1703e+08	5.74292e+08	460867979	4.2068e+08	4.39887e+08	4.79517e+08	3.63393e+08	5.57201e+08	7.09495e+08	5.69327e+08	2.94287e+08	4.77234e+08	2.10723e+08	3.20229e+08	2.34039e+08	6.87014e+08	5.2532e+08	4.16779e+08	5.3981e+08	2.49808e+08	3.76322e+08	6.62324e+08	3.38406e+08	6.73781e+08	6.70655e+08	6.01953e+08	4.34786e+08	5.05974e+08	1.78538e+08	5.86492e+08	469683222	5.83546e+08	7.00552e+08	4.09862e+08	6.64466e+08	6.18267e+08	4.1616e+08
O95972	Bone morphogenetic protein 15	BMP15	BMP15	1.11729e+07	6.39022e+07	3.2101e+07	6.56034e+07	5.68909e+07	3.74699e+07	6.76735e+07	5.38977e+07	6.14319e+07	7.73557e+07	5.09065e+07	5.35559e+07	3.901e+07	4.16356e+07	4.27871e+07	7.0535e+07	4.93353e+07	74697903	6.01503e+07	7.95394e+07	5.87207e+07	6.494e+07	3.78635e+07	5.43247e+07	3.84939e+07	6.12076e+07	4.31148e+07	5.8931e+07	8.06946e+07	5.30376e+07	6.82903e+06	5.46567e+07	7.07812e+07	8.14211e+06	4.8682e+06	5.2316e+07	6.25972e+07	5.27293e+07	1.07772e+08	5.3755e+07	53211150	9.42044e+06	4.80188e+07	3.43475e+07	9.78185e+06	3.80174e+07
K4DI97	BMP-2-inducible protein kinase	BMP2K	BMP2K	0	0	0	1.71503e+06	0	0	0	0	2.39146e+06	2.58827e+06	3.06661e+06	0	0	0	0	2.44946e+06	0	1.56471e+06	0	0	2.16839e+06	0	0	0	0	0	0	0	0	0	0	0	0	0	2.74766e+06	0	0	2.49385e+06	5.06714e+06	2.07135e+06	2.04171e+06	0	0	0	0	0
P12645	Bone morphogenetic protein 3	BMP3	BMP3;BMPY	0	0	1.29796e+06	3.62296e+06	0	909528	1.58246e+06	0	0	1.22192e+06	1.32832e+06	825558	0	0	0	0	0	0	0	1.50761e+06	965703	0	2.15699e+06	0	4.11996e+06	1.96731e+06	0	0	0	0	0	0	0	0	0	0	0	0	0	0	0	0	0	0	0	0
Q14692	Ribosome biogenesis protein BMS1 homolog	BMS1	BMS1	0	608999	0	0	0	0	0	0	0	1.6214e+06	0	748613	0	0	0	1.95164e+06	0	0	0	0	0	1.48748e+06	1.68874e+06	661614	0	0	1.05851e+06	0	1.08974e+06	734115	0	0	1.02325e+06	0	0	0	751776	457231	845883	579653	0	0	0	0	0	0
Q12981	Vesicle transport protein SEC20	BNIP1	BNIP1	1.70388e+07	3.20191e+07	1.45635e+07	3.14163e+07	2.96435e+07	1.62155e+07	3.21167e+07	1.68521e+07	1.86832e+07	3.73828e+07	4.25763e+07	3.86474e+07	2.89077e+07	3.83434e+07	2.82687e+07	3.40635e+07	2.11301e+07	1.95451e+07	1.9816e+07	3.12878e+07	3.55714e+07	4.84528e+07	2.13375e+07	8.73977e+07	1.21392e+07	2.3969e+07	3.00122e+07	3.28739e+07	5.52261e+07	3.7307e+07	2.17571e+07	4.24871e+07	3.1142e+07	1.648e+07	2.38501e+07	2.40707e+07	3.94636e+07	2.802e+07	7.33309e+07	3.13069e+07	3.56039e+07	1.50881e+07	2.08539e+07	2.15169e+07	2.0843e+07	1.5894e+07
H7C096	BCL2/adenovirus E1B 19 kDa protein-interacting protein 2 (Fragment)	BNIP2	PRUNE2;ATCAY;BNIP2	0	0	0	869385	0	0	1.16207e+06	0	0	0	0	0	0	0	0	0	0	0	0	0	0	0	0	0	0	830969	0	0	0	0	0	0	877757	0	0	0	0	0	0	0	0	0	0	0	8.9403e+06	0
Q8NFC6	Biorientation of chromosomes in cell division protein 1-like 1	BOD1L1	BOD1;BOD1L1	0	0	0	0	0	0	0	0	0	0	0	0	673523	1.02758e+06	0	0	0	0	0	0	0	0	1.70106e+06	2.12567e+06	0	0	0	0	1.52632e+06	0	0	913931	1.18502e+06	0	0	0	0	1.38191e+06	1.93944e+06	0	0	0	0	0	0	0
A0A481T0W6	Bcl-2-related ovarian killer protein isoform 3	BOK	BOK	0	3.47959e+06	0	0	0	0	0	0	0	0	0	0	0	0	0	0	0	2.57197e+06	0	0	0	0	0	0	0	0	0	0	0	0	0	0	0	0	1.64275e+06	1.27577e+06	0	0	0	0	2.44185e+06	0	0	0	0	0
Q9Y3E2	BolA-like protein 1	BOLA1	BOLA1	0	0	0	0	757703	0	321203	0	0	0	0	0	0	0	0	0	0	0	524774	509209	550609	655238	0	0	0	0	0	0	0	0	0	0	0	0	0	0	0	0	0	0	0	825956	0	0	0	0
Q9H3K6	BolA-like protein 2	BOLA2	BOLA2;BOLA2-SMG1P6;BOLA2B	2.12559e+07	4.79923e+07	9.50362e+06	2.07665e+07	2.77762e+07	2.27065e+07	3.93039e+07	1.97633e+07	15623925	3.63915e+07	2.58313e+07	4.80594e+07	2.20443e+07	2.74927e+07	3.65955e+07	3.50323e+07	2.36629e+07	2.36794e+07	1.68998e+07	4.33487e+07	3.47504e+07	7.17334e+07	2.17101e+07	9.43042e+07	7.4615e+06	3.32426e+07	2.15521e+07	2.33762e+07	7.02995e+07	3.40181e+07	1.69705e+07	4.13111e+07	5.48157e+07	7.32734e+06	2.55836e+07	32501468	5.9793e+07	4.32984e+07	6.08731e+07	2.06833e+07	2.2207e+07	1.49414e+07	2.60918e+07	5.65403e+06	2.21041e+07	1.67861e+07
Q53S33	BolA-like protein 3	BOLA3	BOLA3	1.69643e+06	0	1.97902e+06	1.81896e+06	2.02482e+06	2.48302e+06	1.87152e+06	2.39808e+06	1.97661e+06	1.66764e+06	2.02467e+06	1.95635e+06	0	2.76321e+06	2.53727e+06	0	1.94755e+06	1.54615e+06	1.748e+06	1.66797e+06	1.13374e+06	0	2.21084e+06	1.6963e+06	1.72136e+06	1.30044e+06	1.40978e+06	0	1.09595e+06	0	1.38558e+06	1.46405e+06	1.12571e+06	0	0	0	0	0	0	0	0	0	0	0	0	0
Q14137	Ribosome biogenesis protein BOP1	BOP1	BOP1	4.94992e+07	1.96893e+07	3.03377e+07	3.11985e+07	2.41223e+07	2.56113e+07	1.30982e+07	4.14471e+07	2.23537e+07	2.66397e+07	1.73946e+07	2.39061e+07	7.0515e+07	2.93521e+07	6.70787e+07	2.26709e+07	4.0159e+07	2.97577e+07	3.20391e+07	2.78013e+07	2.92648e+07	2.29166e+07	3.61936e+07	1.47484e+06	5.93672e+07	2.84234e+07	2.44012e+07	4.84953e+07	1.87962e+07	2.61446e+07	3.40886e+07	3.50361e+07	2.65975e+07	3.54569e+07	2.95916e+07	2.54325e+07	1.11841e+07	0	9.91149e+06	4.58465e+07	0	4.12751e+07	3.25699e+07	0	5.03053e+07	3.84938e+07
Q969J3	BLOC-1-related complex subunit 5	BORCS5	BORCS5	1.27396e+07	4.77032e+07	3.91712e+07	4.26835e+07	4.5811e+07	5.07892e+07	5.42372e+07	4.64758e+07	4.27728e+07	4.60816e+07	4.4501e+07	3.39642e+07	7.42109e+07	5.10074e+07	4.54415e+07	6.06536e+07	2.91148e+07	5.19796e+07	3.95611e+07	5.03072e+07	4.62565e+07	5.75799e+07	1.28823e+08	3.00769e+07	3.65178e+07	4.79512e+07	5.11589e+07	2.27403e+07	4.97096e+07	4.92665e+07	3.76638e+07	3.52067e+07	4.75269e+07	1.23882e+07	39474427	5.77258e+07	5.40092e+07	7.62914e+07	3.68702e+07	6.31662e+07	4.88712e+07	3.77261e+07	3.19525e+07	2.59332e+07	1.47599e+07	3.89038e+07
Q96GS4	BLOC-1-related complex subunit 6	BORCS6	BORCS6	0	0	0	1.70741e+06	1.34745e+06	769146	2.29313e+06	0	1.18288e+06	1.59432e+06	1.23094e+06	1.00906e+06	2.37196e+06	603625	2298910	2.42674e+06	867530	1.16528e+06	790990	2.02036e+06	569404	970146	1.46776e+06	1.15352e+06	785083	829876	929819	236485	3.48052e+06	3.28441e+06	0	1.99042e+06	5.56005e+06	0	2.19224e+06	0	784355	1.77407e+06	882453	0	1.69767e+06	1.29807e+06	0	524273	0	0
Q96FH0	BLOC-1-related complex subunit 8	BORCS8	BORCS8	0	1.98034e+06	0	0	1.36623e+06	0	2.0435e+06	0	0	4.01653e+06	2.16252e+06	0	0	0	0	0	0	1.11655e+06	0	1728687	825807	811370	2.58321e+06	0	0	2.01309e+06	2.04292e+06	0	1.12703e+06	0	997573	0	0	0	0	0	948645	1.81438e+06	4.02465e+06	1.64539e+06	788003	0	0	0	0	0
Q86WA6	Valacyclovir hydrolase	BPHL	BPHL	0	1.75735e+07	506609	2.79092e+06	1.03154e+06	1.42057e+06	5.15851e+06	3.84327e+06	5.07546e+06	1.46118e+07	8.28857e+06	8.67815e+06	5.45095e+06	2.31392e+06	5.64983e+06	8.82708e+06	1.46084e+07	1.79813e+07	2.03432e+06	1.19374e+07	2.68432e+06	2.79014e+06	1.02681e+06	6.30677e+06	0	1.62122e+06	3.94925e+06	7.27777e+06	4.93441e+06	3.93417e+06	3.00145e+06	4.49737e+06	6.17767e+06	3.77129e+06	2.73566e+06	6.05598e+06	8.79336e+06	1.4641e+07	4.76208e+06	3.71392e+06	1.15037e+07	1.23896e+06	2.85265e+06	600544	2.30906e+06	1.43046e+06
P17213	Bactericidal permeability-increasing protein	BPI	BPI	4.7625e+06	5.08733e+06	3.11279e+07	2.05781e+07	7.39073e+06	2.28224e+07	1.25588e+07	7.56931e+07	1.05673e+07	7.52221e+06	6.5013e+06	5.81936e+06	3.51504e+06	1.40295e+07	8.96413e+06	7.35839e+06	1.13165e+07	3.49124e+07	1.05379e+07	33444090	3.31979e+07	2.40507e+07	5.53096e+07	1.70504e+07	1.2988e+07	1.91662e+07	1.4923e+07	5.1035e+06	4.55619e+06	1.14956e+07	2.07832e+07	1.54919e+07	3.13438e+06	2.78528e+07	8.21166e+06	9.69905e+06	6.77008e+06	1.7117e+07	7.07964e+06	6.7733e+06	2.48959e+06	5.21863e+06	1.26281e+07	6.62935e+06	6.64794e+06	9.72528e+06
A2NX48	Bactericidal permeability-increasing protein	BPI	BPI	0	0	0	757338	0	0	914647	0	0	0	0	0	0	0	0	0	0	0	0	0	0	0	0	0	0	0	0	0	1.77354e+06	0	0	0	0	1.7055e+06	0	0	0	2.34861e+06	0	0	0	0	0	0	0	0
Q9NP55	BPI fold-containing family A member 1	BPIFA1	BPIFA1	7.58289e+06	3.87994e+07	0	6.0199e+06	2.15898e+07	8.06253e+06	3.12087e+07	1.11629e+07	1.28623e+07	1.87806e+07	2.39658e+07	1.90524e+07	1.22977e+07	1.40693e+07	2.63376e+07	1.88055e+07	1.99149e+07	9.42653e+06	3.91736e+06	3.25939e+07	2.2734e+07	2.94368e+07	1.4835e+07	1.5416e+08	1.27765e+07	3.049e+07	2.01122e+06	2.49073e+07	4.60579e+07	2.74199e+07	1.47524e+07	4.71361e+07	3.47299e+07	1.2191e+07	6.6043e+06	4.00271e+07	3.00567e+07	7.90404e+07	3.05476e+07	1.98939e+07	3.73276e+07	1.19088e+07	1.4511e+07	6.6774e+06	1.57972e+07	4.12116e+06
Q8TDL5	BPI fold-containing family B member 1	BPIFB1	BPIFB1	8.20189e+07	1.62855e+08	1.63656e+08	1.66642e+08	2.25511e+08	2.98501e+08	1.41809e+08	189941200	1.46779e+08	1.33361e+08	1.7604e+08	1.28013e+08	1.22219e+08	9.51228e+07	240830617	179652488	1.341e+08	1.23266e+08	1.09896e+08	4.29287e+08	2.67814e+08	4.06987e+08	2.77403e+08	1.79286e+08	1.5788e+08	228747416	2.22906e+08	2.06375e+08	2.56513e+08	1.11933e+08	6.65188e+07	2.37261e+08	2.52669e+08	7.06549e+07	9.7746e+07	1.39157e+08	1.9138e+08	2.01598e+08	1.78946e+08	1.88016e+07	144193973	1.04486e+08	1.00307e+08	9.32241e+07	140373935	1.30093e+08
Q8N4F0	BPI fold-containing family B member 2	BPIFB2	BPIFB2	9.3452e+06	1.17568e+07	8.9576e+06	9.6156e+06	7.98041e+06	9.76644e+06	6.24952e+06	4.28486e+06	8.02298e+06	1.35895e+07	1.93961e+07	1.66399e+07	9.06095e+06	1.19434e+07	9.85829e+06	7.60504e+06	1.11414e+07	6.7937e+06	9.20879e+06	14166308	1.48287e+07	1.2898e+07	3.46893e+07	4.96009e+07	1.84359e+07	9.15068e+06	1.41488e+07	1.26487e+07	1.1203e+07	1.38738e+07	8.43686e+06	1.3282e+07	8.30978e+06	1.57385e+07	7.64203e+06	1.71848e+07	1.41635e+07	1.52856e+07	1.59958e+07	2.02141e+07	1.29617e+07	3.55133e+07	2.93233e+07	1.83486e+07	2.07074e+07	1.95694e+07
Q9NX62	Golgi-resident adenosine 3,5-bisphosphate 3-phosphatase	BPNT2	BPNT2	0	2.20402e+06	0	1.99553e+06	6.35191e+06	852828	3.31466e+06	3.98851e+06	731477	0	0	1.17333e+06	7.81158e+06	867812	5.43862e+06	3.14252e+06	0	3.15344e+06	0	8.08569e+06	3.77619e+06	1.22768e+07	3.7707e+06	3.20124e+06	0	1.05975e+06	1.0832e+06	3.42465e+06	2.10147e+06	2.14025e+06	1.50843e+07	6.57231e+06	2.41216e+06	0	0	1.16673e+06	0	0	576124	1.84477e+06	3.35791e+06	1.79785e+07	0	6.87358e+06	460416	2.01732e+07
A0A2R8Y8E0	Non-specific serine/threonine protein kinase	BRAF	RAF1;GTF2I;ARAF;BRAF;SRGAP3:RAF1	1.18738e+07	1.79259e+07	1.78233e+07	4.00758e+07	3.66863e+07	2.1504e+07	4.48483e+07	2.70894e+07	1.18124e+07	2.41565e+07	2.1347e+07	1.12639e+07	4.20031e+07	2.79882e+07	2.42587e+07	2.01407e+07	1.593e+07	1.15602e+07	2.22828e+07	9139188	1.59826e+07	0	0	1.77144e+07	1.13445e+07	3.10649e+07	3.10418e+07	2.13984e+07	1.24008e+07	3.5243e+07	2.09302e+07	2.74303e+07	2.39559e+07	1.11425e+07	2.65733e+07	1.548e+07	2.13674e+07	2.23964e+07	1.67328e+07	3.44365e+07	2.15007e+07	9.21959e+06	0	1.15756e+07	3.80687e+06	1.63353e+07
P46736	Lys-63-specific deubiquitinase BRCC36	BRCC3	BRCC3	3.55147e+06	2.18364e+06	5.55965e+06	6.97973e+06	8.06872e+06	1.27741e+06	1.45672e+07	1.19645e+07	9.32817e+06	3.3342e+06	6.66374e+06	1.25151e+06	2.50714e+06	1.66474e+06	4.14043e+06	1.61009e+06	2.73491e+06	3.56553e+06	2.67518e+06	8.63135e+06	1.07103e+07	1.00603e+07	2.05093e+06	3.31621e+06	3.98556e+06	1.02043e+07	1.09115e+07	7.88046e+06	8.76599e+06	2.9295e+06	4.42273e+06	9.91074e+06	8.42317e+06	3.99828e+06	3.02111e+06	2.31457e+06	3.48791e+06	5.36286e+06	9.4858e+06	6.31687e+06	1.533e+07	1.93976e+06	0	3.29123e+06	0	1.65677e+06
Q15059	Bromodomain-containing protein 3	BRD3	BRD4;BRD2;BRD3	0	1.47592e+06	0	1.28112e+06	0	0	847219	835375	0	1.0311e+06	0	0	922891	783791	718674	698677	0	0	0	985072	1.40006e+06	829807	0	0	0	675801	1.33807e+06	0	1.44139e+06	0	0	1.06303e+06	0	0	0	0	0	1.3101e+06	0	0	0	0	0	0	0	0
O60885	Bromodomain-containing protein 4	BRD4	BRD4;BRD3	1.37029e+06	7.15672e+06	1.02133e+07	1.18539e+07	8.98751e+06	1.20705e+07	1.35444e+07	2.11e+07	7.50868e+06	6.45314e+06	1.30579e+07	5.02347e+06	6.51416e+06	9.65395e+06	9.30866e+06	6.87187e+06	4.71738e+06	7.45738e+06	6.45004e+06	1.88725e+07	7.76503e+06	2.03773e+07	7.98428e+06	6.89125e+06	7.12564e+06	1.15881e+07	8.23118e+06	8.15188e+06	2.5693e+07	9.31672e+06	1.36905e+07	7.60749e+06	8.32721e+06	1.36374e+06	4.61787e+06	5.22382e+06	8.5886e+06	1.48471e+07	1.88964e+07	7.89165e+06	8.32078e+06	3.43974e+06	758155	2.2772e+06	0	4.35557e+06
Q9H0E9	Bromodomain-containing protein 8	BRD8	BRD8	0	0	0	0	0	0	0	0	0	0	0	0	0	0	0	864117	0	0	0	0	0	0	0	0	0	0	0	0	2.04728e+06	0	0	0	0	0	0	0	0	0	0	0	0	0	0	0	0	0
Q8WY22	BRI3-binding protein	BRI3BP	BRI3BP	0	2.33424e+06	1.79016e+06	4.30928e+06	2.90985e+06	2.94388e+06	0	2.93149e+06	6.0594e+06	3.01649e+06	1.84237e+06	4.65613e+06	3.01911e+06	5.35006e+06	4.12512e+06	7.62428e+06	2.37085e+06	3.02884e+06	0	0	0	0	2.01672e+06	1.09065e+07	3.32909e+06	5.22035e+06	2.146e+06	0	1.11258e+07	5.72938e+06	0	3.40863e+06	2.95725e+06	0	2.5559e+06	0	4.03962e+06	0	2.4287e+06	0	4.97724e+06	0	2.12488e+06	0	0	3.16164e+06
Q8WUW1	Protein BRICK1	BRK1	BRK1	8.09854e+06	2.36368e+07	1.65905e+07	1.90275e+07	2.26718e+07	1.91903e+07	2.33782e+07	1.26652e+07	7.70358e+06	1.63552e+07	1.50784e+07	1.6025e+07	8.42485e+06	1.044e+07	1.26845e+07	1.28876e+07	1.55527e+07	2.84078e+07	1.13146e+07	1.33189e+07	4.03299e+07	1.60864e+07	5.11894e+07	1.83812e+07	1.5664e+07	1.38523e+07	1.94775e+07	1.69107e+07	2.18287e+07	1.37239e+07	2.54334e+07	1.52208e+07	1.70869e+07	6.50882e+07	7.51429e+06	1.11703e+07	1.38928e+07	2.29615e+07	2.62418e+07	1.07493e+07	1.48259e+07	4.34441e+07	7.34295e+06	7.90162e+06	4.34536e+06	7.65271e+07
H0YHD0	Breast cancer metastasis-suppressor 1-like protein (Fragment)	BRMS1L	BRMS1L	3.26225e+06	0	7.84722e+06	8.48733e+06	9.8276e+06	9.7927e+06	1.15967e+07	0	5.85109e+06	0	0	0	4.55248e+06	0	3.39606e+06	5.30824e+06	4.67804e+06	3.5172e+06	4.1369e+06	5762140	4.66002e+06	3.04645e+06	6.5944e+06	3.95908e+06	9.32151e+06	1.14072e+07	1.13687e+07	0	0	2.57075e+06	3.1827e+06	5.8879e+06	4.20126e+06	3.98772e+06	5.17684e+06	0	0	3.69198e+06	0	1.81489e+06	4.0815e+06	5.07422e+06	0	2.99374e+06	5.46045e+06	4.41762e+06
Q5VW32	BRO1 domain-containing protein BROX	BROX	BROX	1.7449e+07	3.03665e+07	2.09508e+07	3.4535e+07	3.18893e+07	2.30291e+07	2.00173e+07	4.02055e+07	2.51238e+07	4.02019e+07	3.29073e+07	2.75814e+07	2.3143e+07	3.57318e+07	2.3321e+07	3.75152e+07	2.7604e+07	7.55847e+07	1.39738e+07	3.10393e+07	4.47389e+07	2.73779e+07	2.39494e+07	2.21687e+07	1.95246e+07	3.04434e+07	3.94863e+07	2.74274e+07	9.82733e+07	3.10047e+07	5.25697e+07	1.76825e+07	2.6629e+07	1.8554e+07	1.86188e+07	2.15182e+07	2.43301e+07	3.8759e+07	3.31883e+07	3.04404e+07	3.14893e+07	3.32269e+07	2.8399e+07	2.80148e+07	1.07224e+07	1.3071e+07
Q96G97	Seipin	BSCL2	hCG_2020143;BSCL2	0	2.553e+06	1.38608e+06	2.76967e+06	2.65874e+06	1.64761e+06	2.91038e+06	826480	2.35919e+06	3.24415e+06	5.02103e+06	3.28045e+06	3.94446e+06	1.83372e+06	9.41678e+06	4.83147e+06	0	0	4.06377e+06	8.3553e+06	5.10475e+06	8.33131e+06	1.08115e+07	2.30451e+06	3.75895e+06	1.60948e+06	3.12874e+06	4.70304e+06	16109213	1.06388e+07	0	8.14817e+06	1.08576e+07	0	3.96483e+06	4.34255e+06	5.02496e+06	1.17551e+07	4.15085e+07	3.53178e+06	3.79508e+06	3.41636e+06	3.87336e+06	3.36326e+06	3.14369e+06	2.9577e+06
Q10588	ADP-ribosyl cyclase/cyclic ADP-ribose hydrolase 2	BST1	BST1	2.96164e+06	8.72971e+06	1.27938e+07	2.01127e+07	3.84588e+07	1.43655e+07	2.17055e+07	1.37393e+07	6.23974e+06	1.92509e+07	2.05212e+07	1.17523e+07	1.68124e+07	1.42982e+07	1.18385e+07	2.0904e+07	8.72505e+06	9.19265e+06	9.17198e+06	1.1685e+07	3.31007e+07	4.28081e+07	6.95962e+07	1.15753e+07	2.80092e+07	2.04209e+07	2.39763e+07	1.24107e+07	2.20937e+07	8.37233e+06	6.96833e+06	1.02057e+07	1.93909e+07	1.74187e+06	1.44106e+07	1.64068e+07	1.3019e+07	4.38485e+06	1.56593e+07	1.10658e+07	1.50065e+07	2.21675e+07	3.96844e+06	1.21991e+07	2.76808e+07	1.12527e+07
Q10589	Bone marrow stromal antigen 2	BST2	BST2	2.30138e+07	1.45965e+07	7.54886e+07	4.89068e+07	8.56686e+07	6.3887e+07	4.38674e+07	3.2575e+07	4.90524e+07	1.29764e+07	2.42764e+07	1.84857e+07	4.04819e+07	4.39475e+07	3.07982e+07	3.56463e+07	5.87904e+07	3.98288e+07	5.10819e+07	3.57462e+07	4.37492e+07	2.63796e+07	3.6133e+07	4.45888e+07	9.72873e+07	7.20102e+07	1.34873e+08	4.76761e+07	2.10259e+07	2.67341e+07	2.01061e+07	2.85325e+07	1.93978e+07	4.51722e+07	2.0917e+07	3.21883e+07	2.86082e+07	6.45202e+07	4.53142e+07	3.17497e+07	7.64444e+06	4.65021e+07	2.102e+07	6.73512e+07	4.39255e+07	2.45914e+07
A0A0A0MTH9	TATA-binding protein-associated factor 172	BTAF1	BTAF1	0	1.04366e+06	3.17758e+06	0	749015	0	775796	0	1.38867e+06	0	574746	0	0	0	0	0	0	1.28757e+06	0	1.62741e+06	1.67444e+06	1.05316e+06	0	0	0	628696	2.22922e+06	0	1.79147e+06	0	0	729139	1.03265e+06	0	0	0	0	0	1.2629e+06	0	0	553069	0	0	0	3.13852e+06
A0A024R7E0	BTB (POZ) domain containing 14B, isoform CRA_a	BTBD14B	BTBD14B;NACC1	709713	0	0	2.14749e+06	1.00218e+06	2.15799e+06	0	1.96204e+06	1.5643e+06	651224	628791	2.21221e+06	0	3.87142e+06	4.74075e+06	418408	1.63103e+06	2.29623e+06	0	888996	2.23767e+06	1.83392e+06	0	0	0	0	1.78244e+06	1.39777e+06	2.5208e+06	561522	2.97188e+06	715208	0	0	3.30673e+06	0	0	2.70045e+06	3.47731e+06	609431	644273	1.72449e+06	0	0	3.64083e+06	0
P43251	Biotinidase	BTD	BTD	2.42655e+06	5.19483e+06	1.21319e+06	4.09485e+06	1.86507e+06	834082	3.00315e+06	4.75726e+06	4.98855e+06	1.41949e+06	2.83973e+06	4.38866e+06	3.81959e+06	3.55394e+06	858087	2.61966e+06	873945	4.93213e+06	3.18438e+06	0	2.87929e+06	3.3257e+06	1.15125e+06	4.18413e+06	0	2.95734e+06	491245	4.06578e+06	2.85442e+06	2.36134e+06	6.36505e+06	3.61855e+06	3.27095e+06	0	2.92695e+06	701680	4.01165e+06	1.84537e+06	1.3666e+06	3.85253e+06	3.3195e+06	7.16275e+06	1.84668e+06	2.64123e+06	8.41426e+06	0
P20290	Transcription factor BTF3	BTF3	BTF3	1.81329e+08	5.64044e+08	3.30772e+08	3.86143e+08	3.65465e+08	4.32333e+08	5.04718e+08	541410858	4.37875e+08	4.79372e+08	9.67332e+08	1.58398e+08	2239633624	7.13374e+08	4.67113e+08	918865949	2.29364e+08	7.11798e+08	6.33265e+08	159091060	198879172	3.94116e+08	8.27493e+07	4.53969e+08	4.33515e+07	2.72143e+08	2.97749e+08	7.45895e+08	465647244	8.55305e+08	1464287892	411017180	6.22391e+08	7.61015e+08	9.80931e+08	1263011699	1449843560	1218690884	4.08178e+08	1563130240	1233240460	2.31421e+08	1055500141	7.9843e+08	6.60684e+08	1261020449
Q96K17	Transcription factor BTF3 homolog 4	BTF3L4	BTF3L4	3.33469e+07	105400150	1.6613e+07	3.97558e+07	2.60699e+07	3.35231e+07	3.79369e+07	9.05428e+06	1.52647e+07	2.89869e+07	4.52318e+07	4.39177e+07	2.42623e+07	2.75387e+07	1.77176e+07	2.47443e+07	1.87626e+07	2.26276e+07	2.01054e+07	48171282	2.63468e+07	3.66967e+07	2.62375e+07	2.34079e+07	2.38788e+07	2.82202e+07	3.60701e+07	2.47321e+07	5.02859e+07	3.00866e+07	2.41832e+07	3.94752e+07	5.01305e+07	2.54594e+07	3.01847e+07	2.26516e+07	2.57788e+07	3.4229e+07	7.14401e+07	2.4846e+07	3.45958e+07	2.57111e+07	1.97294e+07	1.5719e+07	2.58403e+07	2.38462e+07
Q5JY90	Tyrosine-protein kinase	BTK	EPHB2;EPHB3;EPHB1;EPHB4;EPHA8;EPHA7;EPHA6;EPHA5;EPHA3;EPHA2;BTK	5.56776e+08	119285862	4.14162e+08	1.08052e+08	1.3072e+08	3.34082e+08	1.50293e+08	3.48833e+08	1.50418e+08	6.22268e+07	7.52686e+07	1.22923e+08	1.54952e+08	1.39221e+08	189387764	1.19279e+08	2.46135e+08	2.60355e+08	3.0643e+08	167920512	2.92974e+08	9.35849e+07	1.78246e+08	5.53491e+07	6.51575e+08	2.76459e+08	1.8932e+08	1.29454e+08	6.74825e+07	1.11915e+08	3.44036e+08	1.586e+08	6.27138e+07	5.49395e+08	3.38647e+08	1.68107e+08	6.29662e+07	3.11905e+07	6.20037e+07	1.90126e+08	1.7914e+08	4.34032e+08	2.20041e+08	4.91468e+08	458792607	1.4594e+08
Q7KYR7	Butyrophilin subfamily 2 member A1	BTN2A1	BTN2A2;BTN2A1	0	0	0	0	0	0	0	1.10317e+06	0	0	0	0	1.28467e+06	0	0	0	0	0	0	0	696858	0	0	482775	0	561229	956487	0	0	1.47966e+08	0	2.39071e+06	0	892247	0	0	0	0	930957	0	0	0	0	0	0	0
A0A1S5UZ21	Butyrophilin-like protein 9	BTNL9	BTNL9	1.42716e+06	0	0	0	1.61048e+06	1.98997e+06	117245	986980	1.27121e+06	0	0	0	0	0	0	0	999523	0	288816	1.47981e+06	1.2884e+06	1.33469e+06	1.60459e+06	1.84035e+07	2.99879e+07	1.11052e+06	1.17208e+06	0	0	697605	3.05623e+06	568557	0	0	2.46358e+06	4.70998e+06	0	2.06687e+06	859429	1.15326e+06	857841	0	0	0	2.93625e+06	0
O43684	Mitotic checkpoint protein BUB3	BUB3	BUB3	2.21609e+07	5.32892e+07	3.63651e+07	4.26267e+07	4.08432e+07	3.19122e+07	5.9725e+07	4.16397e+07	5.79861e+07	4.6916e+07	4.86011e+07	2.88911e+07	1.98481e+07	4.4646e+07	5.58782e+07	6.50987e+07	3.74709e+07	4.99374e+07	2.67643e+07	5.14386e+07	3.10091e+07	4.43291e+07	1.39341e+07	5.85827e+07	3.03909e+07	2.92887e+07	3.86854e+07	3.39095e+07	1.31943e+08	4.43052e+07	1.05332e+07	57371455	4.01167e+07	1.42042e+07	3.05613e+07	2.80613e+07	4.20615e+07	3.89728e+07	69181729	2.19276e+07	4.11881e+07	2.74094e+07	5.25083e+06	2.24184e+07	8.10857e+07	1.02688e+07
P41223	Protein BUD31 homolog	BUD31	BUD31	6853391670	3687407860	4295737799	3118954615	3235177279	4210398183	1290314772	2793191341	3752075348	2558241597	2280961443	4096099638	4526046751	3174958785	5567254296	3651231293	5174819766	4704211823	6560622251	2482563705	3905929274	2025266104	4085412824	1257904329	4303627500	3044730994	2904223426	4420593921	2303106858	3989003885	6295694071	3727437656	2898590425	6763454170	5389121891	4213240862	2489442639	8.83043e+08	2148298264	4854791962	3802473952	4996767353	5560072754	5931407160	5822998686	5429961191
A0JLQ5	Brix domain-containing protein 2 (Fragment)	BXDC2	BRIX1;BXDC2	1.79939e+06	4.50517e+06	7.16866e+06	1.128e+07	7.36955e+06	9.70454e+06	4.37231e+06	4.51763e+06	5.68748e+06	7.30733e+06	7.22064e+06	7.52874e+06	6.69395e+06	3.31241e+06	7.62633e+06	7.36219e+06	3.59237e+06	3.93206e+06	5.52209e+06	9.58447e+06	8.92717e+06	9.03319e+06	8.56737e+06	3.34446e+06	6.11581e+06	5.04865e+06	7.55967e+06	6.76003e+06	1.37191e+07	4.56433e+06	5.14307e+06	1.41413e+07	9.23555e+06	0	3.06539e+06	8.43588e+06	3.42615e+06	2.06238e+06	1.52157e+07	1.03186e+07	7.54316e+06	6.09336e+06	9.6296e+06	3.46493e+06	6.01462e+06	4.19918e+06
Q9Y6E2	Basic leucine zipper and W2 domain-containing protein 2	BZW2	hCG_2022736;BZW1;BZW2	2.62702e+07	4.8331e+07	3.94626e+07	6.31802e+07	6.85396e+07	5.2899e+07	2.95796e+07	5.80515e+07	7.22552e+07	1.24586e+08	8.16656e+07	4.79076e+07	1.69034e+07	9.10448e+07	7.75019e+07	2.59715e+07	9.92562e+07	8.97848e+07	4.02557e+07	1.08526e+08	1.26833e+08	1.12637e+08	5.7392e+07	6.41235e+07	1.46976e+07	66259734	2.56418e+07	2.81997e+07	6.53848e+07	2.71392e+07	6.35572e+07	4.1027e+07	2.91668e+07	3.4756e+07	5.93895e+07	2.19433e+07	2.7173e+07	2.49917e+07	4.58537e+07	3.0635e+07	4.01542e+07	1.24222e+07	1.51101e+07	1.00102e+07	3.77447e+07	1.1107e+07
A0A024QZL0	Chromosome 10 open reading frame 35, isoform CRA_a	C10orf35	C10orf35	917520	0	1.22951e+06	3.35486e+06	1.58798e+06	2.47361e+06	0	2.87462e+06	2.19201e+06	2.52996e+06	2.39415e+06	0	1.37688e+06	2.6723e+06	0	2.18882e+06	0	2.39842e+06	0	0	2.30395e+06	0	0	0	1.64735e+06	1.68377e+06	2.40151e+06	2.01524e+06	4.50996e+06	1.2696e+06	1.55789e+06	0	1.9747e+06	862539	1.59009e+06	0	0	1.63992e+06	3.12212e+06	0	0	0	0	0	1.68546e+06	775330
Q2TA85	C10orf54 protein (Fragment)	C10orf54	C10orf54;VSIR	1.72349e+07	9.28264e+06	1.38665e+07	1.23135e+07	1.17061e+07	1.53285e+07	1.34665e+07	1.03328e+07	1.35043e+07	8.61351e+06	1.63392e+07	1.48049e+07	1.27172e+07	1.02811e+07	9.62066e+06	1.26496e+07	1.37899e+07	5.43943e+06	9.16193e+06	16206152	1.49983e+07	1.35025e+07	2.3496e+07	1.24475e+07	2.07497e+07	1.5145e+07	1.07081e+07	1.57964e+07	1.19839e+07	7.81191e+06	1.00294e+07	1.03066e+07	7.88776e+06	1.71612e+07	1.3442e+07	1.24294e+07	1.53339e+07	1.29393e+07	1.24206e+07	9.01152e+06	1.22014e+07	2.87988e+07	2.36706e+07	2.60956e+07	1.89298e+07	1.72779e+07
A0A024QZN7	Chromosome 10 open reading frame 70, isoform CRA_b	C10orf70	C10orf70	1.32797e+07	3.7224e+07	5.02575e+07	7.13329e+07	5.31745e+07	5.56673e+07	8.09835e+07	9.20704e+07	7.72862e+07	5.02351e+07	8.05652e+07	3.12078e+07	2.75367e+07	8.89267e+07	3.83727e+07	4.48511e+07	9.14246e+07	6.59717e+07	5.32708e+07	7.68001e+07	4.97727e+07	5.68563e+07	1.64447e+07	5.9346e+07	2.82562e+07	5.86565e+07	3.77561e+07	5.96619e+07	5.587e+07	2.53721e+07	1.36436e+07	3.50218e+07	1.92918e+07	1.49332e+07	1.30842e+07	3.67217e+07	5.04543e+07	4.1246e+07	4.77849e+07	2.34609e+07	5.31407e+07	1.45172e+07	4.14722e+07	2.41345e+07	1.68495e+07	3.3536e+07
A0A024R396	Chromosome 11 open reading frame 54, isoform CRA_a	C11orf54	C11orf54	1.5581e+08	3.30487e+07	1.11318e+08	1.02166e+08	3.36551e+07	1.30575e+08	4.72112e+07	5.30852e+07	8.38248e+07	6.5843e+07	4.66933e+07	5.36135e+07	3.98535e+07	6.12443e+07	5.95646e+07	4.19269e+07	5.5286e+07	8.20708e+07	3.73772e+07	1.05658e+08	4.28654e+07	60635423	1.14034e+08	9.93997e+07	6.29806e+07	5.39866e+07	5.33441e+07	1.03796e+08	3.53668e+07	7.60862e+07	5.25764e+07	7.67283e+07	1.37958e+08	5.21183e+07	1.1307e+08	1.62318e+08	1.47602e+07	1.95588e+07	2.87041e+07	1.54589e+07	6.05681e+07	4.43016e+07	3.69056e+07	6.06823e+07	3.76233e+07	9.08516e+07
Q9H3H3	UPF0696 protein C11orf68	C11orf68	C11orf68	1.2627e+06	8.88471e+06	1.91361e+06	1.29177e+07	3.60193e+06	2.31112e+06	1.20161e+07	576945	1.95345e+06	2.74821e+07	1.43472e+07	4.34712e+06	5.64822e+06	2.04317e+07	6.7519e+06	3.53164e+06	2.56528e+06	3.11507e+06	2.16273e+06	7.74823e+06	4.13945e+06	7.69545e+06	2.44343e+06	7.77324e+06	1.97582e+06	3.10142e+06	1.21029e+06	2.97944e+06	9.16601e+06	4.54192e+06	940312	2.58326e+06	3.88824e+06	0	3.01182e+06	3.17558e+06	4.06389e+06	2.03081e+06	3.21072e+06	4.60715e+06	3.3281e+06	938921	857298	954246	1.02906e+06	1.13941e+06
Q7Z7L8	Uncharacterized protein C11orf96	C11orf96	C11orf96	4.56388e+06	4.62908e+06	5.41046e+06	4.44518e+06	5.27125e+06	1.83215e+06	0	3.29192e+06	3.81298e+06	1.95948e+06	2.49971e+06	1.70429e+06	1.71399e+06	1.59886e+06	5.29793e+06	3.17702e+06	1.94879e+06	933607	4.64727e+06	2.04505e+06	6.03333e+06	5.5032e+06	2.50531e+06	1.95064e+06	2.68457e+06	1.40845e+07	1.15107e+07	2.40862e+06	704133	1.36381e+06	2.01436e+06	1.37449e+06	1.76485e+06	0	2.53703e+06	5.12594e+06	1.23226e+06	1.88812e+06	6.29351e+06	1.44247e+06	2.05022e+06	993468	2.02283e+06	2.84696e+06	2.3597e+06	888149
E9PRG8	Uncharacterized protein C11orf98	C11orf98	C11orf48;C11orf98	4.75594e+06	1.57117e+07	1.2638e+07	2.50397e+07	1.90248e+07	1.31445e+07	1.4611e+07	2.59761e+07	2.65785e+07	1.79312e+07	1.29187e+07	1.3716e+07	1.23796e+07	1.84887e+07	1.426e+07	15383169	1.56827e+07	3.29625e+07	1.17333e+07	12917359	1.97645e+07	1.20281e+07	1.06312e+07	1.45602e+07	1.17261e+07	1.57628e+07	1.99641e+07	1.74537e+07	1.82175e+07	1.07048e+07	1.00382e+07	1.14012e+07	1.47227e+07	5.67783e+06	1.24621e+07	1.32599e+07	8.32794e+06	1.32592e+07	1.88809e+07	1.17147e+07	1.92367e+07	7.00157e+06	5.12275e+06	6.21013e+06	6.04246e+06	8.44735e+06
Q96CT6	C12orf10 protein (Fragment)	C12orf10	C12orf10;MST024;MYG1	2.33307e+06	5.67721e+06	2.28502e+06	6.27967e+06	3.78942e+06	2.50792e+06	3.18265e+06	3.62354e+06	1.86642e+06	6.06804e+06	7.058e+06	5.02575e+06	4.89282e+06	4.25451e+06	5.79424e+06	4.44179e+06	7.89464e+06	6.72762e+06	1.64011e+06	4.84918e+06	4.89177e+06	4.26168e+06	1.46602e+06	4.86859e+06	1.43609e+06	6.11404e+06	1.99799e+06	9.65469e+06	1.381e+07	2.2131e+06	5.68652e+06	4.32925e+06	7.74143e+06	4.17066e+06	0	3.41815e+06	3.54484e+06	4.31935e+06	4.49812e+06	4.83726e+06	5.46753e+06	0	1.23883e+06	7.37035e+06	1.04281e+07	2.31345e+06
Q9NQ89	Protein C12orf4	C12orf4	C12orf4	0	0	0	454360	0	0	557920	0	0	1.07765e+06	542493	1.06133e+06	0	0	0	0	657612	1.12506e+06	0	803652	0	446724	0	0	0	0	750068	0	0	0	0	0	0	0	796927	0	0	0	0	0	0	0	0	0	0	0
Q99622	Protein C10	C12orf57	C12orf57	1.15814e+06	1.3738e+07	1.24511e+06	0	0	1.56611e+06	2.65212e+06	0	1.0381e+07	0	2.24379e+06	2.21365e+06	1.25637e+07	0	0	1.6308e+06	9.55556e+06	4.86602e+06	7.22248e+06	8.10142e+06	5.81403e+06	1.07919e+07	1.14513e+06	0	0	1.51419e+06	1.67675e+06	1.57886e+07	4.78208e+06	1.34006e+07	0	4.23032e+06	1.61784e+07	1.01815e+07	9.33245e+06	1.1348e+07	0	0	8.14555e+06	1.20937e+07	2.98311e+06	0	2.84426e+06	858335	0	1.20441e+07
A0A024RDT6	SPRY domain-containing protein 7	C13orf1	C13orf1	0	0	648168	3.38999e+06	1.99376e+06	462394	1.37762e+06	1.1849e+06	0	0	1.02385e+06	1.9867e+06	0	0	0	518579	808057	1.78873e+06	0	0	0	0	0	0	0	1.51373e+06	0	1.77637e+06	1.02965e+06	0	0	848828	0	0	1.52038e+06	0	0	0	2.42352e+06	0	1.18109e+06	0	0	0	0	0
Q4LE40	C14orf159 variant protein (Fragment)	C14orf159	DGLUCY;C14orf159	1.54229e+07	3.52615e+07	4.43338e+07	3.77308e+07	47134546	2.14422e+07	5.07114e+07	5.09143e+07	4.50757e+07	3.76083e+07	5.84698e+07	41645374	5.62358e+07	3.67654e+07	2.68106e+07	3.25868e+07	1.90468e+07	2.78603e+07	3.79862e+07	4.88142e+07	5.72425e+07	7.06015e+07	1.89551e+07	2.20136e+07	3.30975e+07	1.9529e+07	5.47732e+07	3.47494e+07	2.17439e+07	3.89625e+07	2.2415e+07	2.70933e+07	3.80256e+07	1.91885e+07	3.06812e+07	2.64709e+07	1.46643e+08	2.1491e+07	2.52864e+07	5.42312e+07	4.67529e+07	3.24358e+07	2.86778e+07	2.14603e+07	2.87838e+07	3.87488e+07
Q549M8	RNA transcription, translation and transport factor protein	C14orf166	C14orf166;RTRAF	3.93151e+07	68035005	3.67946e+07	5.5572e+07	5.5313e+07	3.96516e+07	6.18758e+07	3.37871e+07	5.30401e+07	7.62787e+07	4.77151e+07	7.33056e+07	6.80214e+07	6.50008e+07	6.91278e+07	7.42529e+07	5.11739e+07	8.68609e+07	5.13573e+07	6.87865e+07	5.30083e+07	6.17631e+07	5.11091e+07	9.14749e+07	3.64725e+07	4.97034e+07	5.28445e+07	4.9924e+07	1.14574e+08	4.61778e+07	2.88838e+07	5.05328e+07	5.45431e+07	2.0123e+07	3.64279e+07	4.06831e+07	5.30364e+07	5.01432e+07	8.12841e+07	5.82871e+07	4.90408e+07	3.18952e+07	2.19536e+07	2.72885e+07	4.19445e+07	4.60033e+07
A0A024R9K7	ER membrane protein complex subunit 7	C15orf24	C15orf24;EMC7	1.57649e+07	6.14297e+06	5.08681e+06	1.01495e+07	1.86384e+07	7.6352e+06	9.87826e+06	1.92175e+07	4.48162e+06	1.15163e+07	9.55696e+06	5.98998e+06	5.34422e+07	5.87194e+06	4.51958e+06	6.0427e+06	6.15407e+06	1.38403e+07	6.30083e+06	19293253	1.07645e+07	1.71735e+07	1.08738e+07	9.27845e+06	6.44459e+06	6.73233e+06	1.0215e+07	4.08542e+06	1.39135e+07	7.80464e+06	8.2535e+06	8.34762e+06	2.78641e+07	3.66606e+06	1.31304e+07	1.39984e+07	1.10226e+07	5.90123e+06	1.629e+07	7.23703e+06	3.48384e+06	995937	798039	1.10095e+06	3.65196e+06	2.54691e+06
A0A0A6YYH1	Arpin	C15orf38-AP3S2	AP3S2;ARPIN;ARPIN-AP3S2;C15orf38-AP3S2	9.20917e+06	8.636e+06	4.51995e+06	2.14321e+07	1.92168e+07	8.16882e+06	1.76534e+07	2.16787e+07	8.44015e+06	1.63835e+07	2.27372e+07	1.07152e+07	1.48728e+07	1.98926e+07	1.41949e+07	2.69667e+07	1.91664e+07	2.04027e+07	4.67571e+06	5.22442e+07	3.12494e+07	7.84186e+06	3.31811e+06	1.46091e+07	3.25766e+06	3.86543e+07	5.9601e+06	1.73199e+07	1.70498e+07	2.62509e+07	1.49441e+07	1.50694e+07	1.44963e+07	1.4031e+07	1.68221e+07	9.57083e+06	1.46796e+07	9.22633e+06	3.12959e+07	1.86486e+07	1.21324e+07	1.61413e+07	1.47995e+07	4.59205e+06	2.67893e+07	2.26318e+07
H3BS58	UPF0183 protein C16orf70 (Fragment)	C16orf70	C16orf70	0	1.11191e+06	0	2.13941e+06	2.85224e+06	1.71018e+06	2.83331e+06	2.28313e+06	1.25667e+06	2.12109e+06	2.36007e+06	1.243e+06	0	1.98294e+06	3.19883e+06	2.8008e+06	1.49725e+06	1.68043e+06	1.20612e+06	2.77197e+06	0	2.07213e+06	0	956610	0	0	0	834663	2.58879e+06	1.14441e+06	0	1.92759e+06	1.58771e+06	0	0	784887	1.36491e+06	1.65127e+06	2.11249e+06	0	1.52563e+06	0	0	0	0	0
Q6UX73	UPF0764 protein C16orf89	C16orf89	C16orf89;PHLDB3	4.02204e+07	2.46142e+07	5.5705e+06	1.82806e+07	8.69604e+06	1.58161e+07	1.12096e+07	9.32363e+06	2.1655e+07	4.87165e+07	1.65431e+07	1.19558e+07	1.57162e+07	1.65394e+07	1.87732e+07	3.28634e+07	2.11631e+07	8.84447e+07	1.97982e+07	4.07731e+07	8.2583e+06	2.48236e+07	6.79138e+07	6.9845e+07	1.25579e+07	9.6423e+06	1.31335e+07	2.9416e+07	1.52253e+07	2.33058e+07	2.5898e+07	2.1488e+07	1.15447e+07	7.70869e+07	3.33798e+07	2.9246e+07	3.39319e+07	1.01436e+07	3.77042e+07	1.88049e+07	6.34725e+07	3.14933e+07	3.19981e+07	3.50916e+07	5.47447e+07	2.06277e+07
F8W038	Chromosome 17 open reading frame 49	C17orf49	C17orf49;RNASEK-C17orf49;BAP18	9.59482e+06	2.08844e+07	8.76685e+06	2.25455e+07	2.87807e+07	2.49432e+07	6.47625e+07	1.82456e+07	4.91522e+07	3.38708e+07	1.66531e+07	1.3843e+07	1.1632e+07	1.29445e+07	2.55288e+07	3.09792e+07	1.13634e+07	2.34968e+07	1.33214e+07	2.96512e+07	2.97934e+07	3.63207e+07	2.53385e+07	8.09895e+06	1.95452e+07	1.98038e+07	1.7537e+07	1.24428e+07	7.94263e+07	2.05621e+07	9.97762e+06	1.6531e+07	2.94852e+07	7.98851e+06	1.30319e+07	1.11272e+07	3.61752e+07	1.24077e+07	4.8414e+07	1.88411e+07	2.10893e+07	9.73053e+06	6.82585e+06	7.19897e+06	1.27715e+07	5.70913e+06
J3KRR1	Protein Njmu-R1 (Fragment)	C17orf75	C17orf75	0	4.08768e+06	1.46896e+06	6.85363e+06	4.74794e+06	3.45376e+06	7.41592e+06	2.05481e+06	3.38308e+06	5.0167e+06	3.20421e+06	1.89789e+06	2.96116e+06	3.01198e+06	3.49256e+06	6.37734e+06	3.70091e+06	2.48206e+06	4.73723e+06	3039941	8.33306e+06	4.16797e+06	0	3.29106e+06	1.81418e+06	1.89578e+06	4.48657e+06	7.06233e+06	4.96387e+06	4.21393e+06	1.48707e+06	5.41171e+06	994002	1.13702e+06	0	2.80564e+06	6.94744e+06	3.01574e+06	4.34479e+06	6.50176e+06	1.26558e+06	0	998724	0	0	0
Q6NX55	Chromosome 19 open reading frame 2	C19orf2	C19orf2;URI1	0	0	0	0	822127	0	1.05592e+06	0	0	601480	0	0	0	0	1.3072e+06	0	0	0	0	0	0	0	0	0	0	0	0	0	0	0	0	0	0	0	0	0	0	0	760332	0	0	0	1.54857e+06	0	0	0
Q9UNZ5	Leydig cell tumor 10 kDa protein homolog	C19orf53	C19orf53	1.12772e+06	3.45173e+06	4.31181e+07	4.65635e+07	3.94197e+07	2.94506e+07	1.59377e+07	5.90071e+07	1.99573e+07	1.55439e+07	1.09575e+07	1.55833e+07	0	2.06521e+07	1.22116e+07	3.49091e+06	5.06693e+07	1.77396e+07	1.66901e+07	3.92815e+07	1.16998e+07	1.96758e+07	1.60662e+07	9.13206e+06	2.94403e+07	2.71165e+07	3.07525e+07	3.28245e+06	5.9963e+06	3.13172e+06	0	999176	2.06258e+06	1.42905e+06	2.75642e+06	0	2.73066e+06	1.48663e+06	6.48732e+06	2.43057e+06	5.4611e+06	3.4751e+06	4.68683e+06	4.21075e+06	6.52456e+06	5.9288e+06
Q9NS00	Glycoprotein-N-acetylgalactosamine 3-beta-galactosyltransferase 1	C1GALT1	C1GALT1	2.2472e+06	4.35096e+06	713126	9.19921e+06	5.3495e+06	1.11182e+07	9.82634e+06	8.96841e+06	6.84563e+06	7.54441e+06	6.30379e+06	9.30748e+06	786538	5.68729e+06	6.16762e+06	7.68994e+06	7.89208e+06	3.38708e+06	5.89775e+06	8.68025e+06	6.43469e+06	6.24625e+06	4.8678e+06	4.47558e+06	4.77411e+06	4.33044e+06	1.05563e+06	3.25741e+06	1.26784e+07	5.06951e+06	1.97947e+06	0	0	2.86037e+06	1.5935e+06	4.97595e+06	6.18321e+06	5.8708e+06	2.18224e+06	1.03642e+06	2.98822e+06	0	3.36289e+06	850322	3.83437e+06	3.54376e+06
Q96EU7	C1GALT1-specific chaperone 1	C1GALT1C1	C1GALT1C1	0	0	0	0	0	0	0	0	0	0	0	0	0	0	0	0	0	0	0	0	615366	0	535737	0	0	0	0	0	0	0	0	0	0	0	0	0	0	0	0	0	0	0	0	0	0	0
Q6ZSJ8	Uncharacterized protein C1orf122	C1orf122	C1orf122	0	1.2113e+06	0	0	0	537252	0	0	730511	1.08862e+06	1.02302e+06	1.00114e+06	0	0	0	0	0	0	0	0	0	0	0	0	0	0	0	0	0	0	0	949347	0	0	0	0	0	0	1.86635e+06	0	0	0	0	0	0	0
Q5VUY5	Uncharacterized protein C1orf158	C1orf158	C1orf158	0	0	0	0	0	0	0	0	0	0	0	0	30257.2	0	0	0	0	0	0	0	0	0	0	0	0	0	0	14001.9	16287.1	0	0	11290.8	17043.5	0	0	0	0	0	24324.6	0	0	0	0	0	0	0
H0Y5F2	Uncharacterized protein C1orf167 (Fragment)	C1orf167	C1orf167	680403	655486	557734	2.74045e+06	1.22129e+06	1.03259e+06	4.4447e+06	1.0698e+06	958543	2.51526e+06	3.38456e+06	987026	0	2.07786e+06	857885	1.88004e+06	975378	2.69461e+06	0	3.87202e+06	1.29125e+06	3.74274e+06	0	1.13123e+06	0	1.69636e+06	722667	766997	2.50901e+06	0	0	1.42255e+06	1.61715e+06	521920	4.4828e+06	0	922920	828089	1.68112e+06	570001	2.91202e+06	0	611290	665659	1.83826e+06	723068
Q8IYL3	UPF0688 protein C1orf174	C1orf174	C1orf174	0	0	0	0	0	1.94317e+06	1.94961e+06	0	0	0	0	0	0	0	0	0	1.09958e+06	0	0	0	1.38075e+06	0	1.68105e+06	983415	1.13678e+06	1.20964e+06	0	0	1.79145e+06	0	0	0	0	0	0	0	0	0	0	0	0	0	0	0	0	0
A1NYL2	Chromosome 1 open reading frame 198, isoform CRA_a	C1orf198	C1orf198	1.62589e+07	2.8229e+07	3.0753e+07	3.57753e+07	3.26036e+07	2.72757e+07	3.06373e+07	2.81164e+07	2.49802e+07	1.89091e+07	2.10216e+07	1.33807e+07	9.36206e+06	3.78913e+07	9.44313e+06	2.43143e+07	3.26616e+07	1.76593e+07	2.57144e+07	1.85994e+07	3.20661e+07	2.14084e+07	1.8278e+07	1.32875e+07	4.52819e+07	3.05273e+07	6.4557e+07	1.54098e+07	3.78407e+07	1.33291e+07	1.38961e+07	1.18527e+07	3.09793e+07	1.6931e+07	1.68327e+07	1.06575e+07	3.65266e+07	1.53519e+07	1.88316e+07	1.83122e+07	2.26783e+07	2.79708e+07	1.29626e+07	3.95725e+07	1.84846e+07	1.95914e+07
Q8IVY1	Type III endosome membrane protein TEMP	C1orf210	C1orf210	0	0	0	0	0	0	0	0	0	0	0	0	0	0	0	0	0	0	0	0	0	0	0	0	0	0	0	0	0	0	0	0	0	0	0	0	0	0	0	0	0	0	0	0	0	0
A0A024R973	Protein odr-4 homolog	C1orf27	C1orf27;ODR4	0	919182	2.5855e+06	6.50397e+06	3.35805e+06	3.39998e+06	4.60463e+06	1.02973e+07	1.43009e+06	4.02167e+06	5.54314e+06	0	467418	3.67222e+06	2.52741e+06	6.26216e+06	0	6.03905e+06	8.86018e+06	1.87809e+06	1.41555e+06	4.41646e+06	0	9.91497e+06	0	1.21379e+07	1.48029e+06	1.83276e+06	4.02191e+06	3.34032e+06	893408	7.50846e+06	3.20507e+06	0	0	1.66257e+06	3.74708e+06	733059	8.02677e+06	2.90796e+06	1.47308e+06	1.35789e+06	462804	3.8843e+06	4.54897e+06	0
Q9BV19	Uncharacterized protein C1orf50	C1orf50	C1orf50	0	0	0	2.33119e+06	0	0	0	0	0	0	0	0	1.80002e+06	0	0	0	0	0	0	2243997	0	2.74464e+06	0	1.22246e+06	0	1.58163e+06	0	0	0	0	2.49719e+06	0	0	4.57511e+06	1.22463e+07	0	727131	0	0	0	2.02263e+06	0	0	0	0	2.15948e+06
A0A0A0MSV6	Complement C1q subcomponent subunit B (Fragment)	C1QB	ADIA;C1QB	2.57939e+07	5.28109e+07	3.12571e+07	5.20739e+07	4.22238e+07	4.28356e+07	3.54309e+07	6.32601e+07	2.94423e+07	2.97896e+07	1.24136e+08	4.0128e+07	2.34427e+07	3.75669e+07	6.33611e+07	4.78505e+07	3.75551e+07	2.60873e+07	3.6011e+07	4.97829e+07	4.05244e+07	7.25884e+07	3.42138e+07	5.35484e+07	2.14019e+07	2.1486e+07	3.25277e+07	5.6741e+07	5.51836e+07	3.97883e+07	2.16497e+07	5.00943e+07	4.61619e+07	2.02457e+07	3.21395e+07	6.01525e+07	60577012	1.05886e+08	4.6075e+07	4.15172e+07	3.75065e+07	4.21634e+07	9.74683e+07	2.61385e+07	3.78545e+07	2.88043e+07
Q07021	Complement component 1 Q subcomponent-binding protein, mitochondrial	C1QBP	C1QBP	4.99459e+07	8.84488e+07	3.75085e+07	1.49002e+08	7.46341e+07	8.06394e+07	1.26128e+08	7.6618e+07	6.84332e+07	1.13746e+08	8.85958e+07	1.10029e+08	5.6825e+07	6.92015e+07	1.11479e+08	9.73996e+07	1.36651e+08	8.8945e+07	5.92222e+07	9.63285e+07	6.58701e+07	1.14098e+08	9.81684e+07	4.95471e+07	4.16207e+07	4.63241e+07	8.57505e+07	1.01201e+08	1.90241e+08	5.65928e+07	4.20482e+07	7.64521e+07	1.06192e+08	1.85548e+07	5.29465e+07	6.63734e+07	9.29761e+07	4.76478e+07	128542553	6.68446e+07	9.02175e+07	3.1757e+07	5.65797e+07	5.8965e+07	7.05777e+07	4.87332e+07
Q9BXJ0	Complement C1q tumor necrosis factor-related protein 5	C1QTNF5	C1QTNF5	0	1.11109e+06	766867	1.05698e+06	0	1.01017e+06	0	0	0	0	3.8901e+06	0	0	734767	1.47551e+06	0	0	821488	0	960605	0	0	601350	1.49253e+06	0	0	0	1.60082e+06	0	0	0	0	1.19045e+06	0	1.05155e+06	1.23451e+06	0	0	0	968274	0	0	0	0	0	0
Q9NZP8	Complement C1r subcomponent-like protein	C1RL	C1R;C1RL	6.36817e+06	1.35693e+06	4.97111e+06	1.6533e+06	837673	699858	0	4.35285e+06	1.01829e+06	2.46896e+06	789972	551863	7.43827e+06	597834	6.20995e+06	0	0	4.31648e+06	963409	981237	1.84401e+06	9.16966e+06	4.7027e+06	1.11113e+06	1.42921e+06	1.00777e+06	1.26287e+06	9.57856e+06	3.77941e+07	1.21299e+07	0	1.14256e+07	0	6.7391e+06	8.13429e+06	8.23525e+06	627445	1.23251e+07	3.28286e+07	1.13012e+07	1.42486e+06	4.76368e+06	6.56424e+06	4.12171e+06	5.48953e+06	4.59775e+06
P09871	Complement C1s subcomponent	C1S	C1S;MASP1;DKFZp686O1553	109258173	3.61156e+07	5.62522e+07	4.84628e+07	3.33313e+07	4.46803e+07	3.20825e+07	4.24557e+07	4.73318e+07	3.68698e+07	3.04762e+07	5.44228e+07	4.77511e+07	4.37766e+07	7.5551e+07	3.682e+07	3.71748e+07	4.12779e+07	4.49404e+07	3.36511e+07	4.03442e+07	3.9009e+07	1.78378e+08	2.62851e+07	9.16758e+07	4.50002e+07	3.68719e+07	6.13964e+07	1.83461e+07	3.37608e+07	9.29727e+07	2.77334e+07	2.90168e+07	1.14922e+08	6.39455e+07	7.50264e+07	5.25271e+07	3.00255e+07	9.23003e+07	7.44588e+07	5.06985e+07	7.64952e+07	7.18574e+07	7.27995e+07	5.53282e+07	5.78161e+07
Q9GZN8	UPF0687 protein C20orf27	C20orf27	C20orf27	2.98284e+06	3.51449e+06	1.81287e+06	1.14536e+06	1.27017e+07	1.81907e+06	1.48915e+06	0	2.19823e+06	7.95576e+06	2.73266e+06	1.72981e+06	2.11662e+06	2.07603e+06	9.45742e+06	1.13808e+07	2.27524e+06	7.44748e+06	1.81009e+06	3.45567e+06	2.15515e+06	3.1626e+06	0	1.78363e+06	0	3.39358e+06	1.54775e+06	3.38884e+06	1.34266e+07	3.85574e+06	4.25136e+06	1.94121e+06	3.30924e+06	1.81682e+06	3.81893e+06	3.15448e+06	3.46294e+06	5.45987e+06	2.4981e+06	9.81517e+06	3.05333e+07	7.18961e+06	3.09342e+06	1.43874e+06	1.69521e+06	4.47584e+06
Q86YS7	C2 domain-containing protein 5	C2CD5	KIAA0528;C2CD5	0	2.54791e+06	5.12209e+06	8.57012e+06	1.46379e+07	3.88336e+06	7.38676e+06	4.69636e+06	0	7.25539e+06	9.55814e+06	673219	1.14334e+07	1.30036e+07	6.8131e+06	1.19653e+07	2.77024e+06	0	0	8.36088e+06	6.6625e+06	7.28883e+06	3.03276e+06	5.12591e+06	2.41158e+06	9.77697e+06	6.58991e+06	1.52049e+07	6.55024e+06	3.33654e+06	1.31748e+06	1.15963e+07	5.51145e+06	0	2.3242e+07	2.65823e+06	1.28357e+06	1.04084e+07	1.61768e+07	3.83274e+06	1.98457e+07	2.51732e+06	0	4.42823e+06	1.66165e+07	0
Q9BVC5	Ashwin	C2orf49	C2orf49	0	0	0	0	0	0	0	0	0	1.00825e+06	0	963093	0	0	0	0	691761	0	0	0	0	0	0	0	0	0	0	0	0	0	0	0	0	0	0	0	0	0	0	0	0	0	0	0	0	0
P01024	Complement C3	C3	C3;C1orf156	5103316707	2342803045	2614199422	2305356878	2050033899	2856147215	1851229990	1915548255	2164761674	1685814571	2375253886	2548859389	2093846964	2304134231	2549246882	2610207653	2738764494	2403016682	2589706773	2413425548	2291537065	2673882243	1480805398	4833929360	3085385530	2207144346	1742868893	2605920723	1803738492	2550917395	2752083303	4317372307	1351013886	4077488240	1865145619	4218912281	2473128531	3037075686	2332905605	3319933990	2588050142	4896863945	3958474334	3721207381	3829850781	3453875390
M0R1Q1	Complement C3 (Fragment)	C3	C3;C1orf156	0	0	0	0	0	0	0	0	0	0	0	0	0	0	0	0	0	0	0	0	0	0	0	0	0	0	0	0	0	0	0	0	0	0	0	0	0	0	0	0	0	0	0	0	0	0
P0C0L4	Complement C4-A	C4A	C4B_2;C4A;C4B;ZA	0	1.144e+06	0	1.91934e+06	0	2.18845e+06	0	4.90949e+06	1.50178e+06	0	2.05321e+06	414607	4.22195e+06	1.80296e+06	3.0059e+06	0	0	0	0	0	2.44834e+06	2.6636e+06	3.09798e+06	0	0	0	0	0	0	1.60441e+06	0	0	0	3.24401e+06	0	1.63923e+06	0	2.53562e+06	0	1.30042e+06	2.20043e+06	0	0	0	0	0
Q9UNU2	Complement protein C4B frameshift mutant (Fragment)	C4B	C4A;C4B;C4B_2	3.26873e+06	0	4.17479e+06	5.14807e+06	1.558e+06	1.28686e+06	4.15962e+06	4.96314e+06	3.36875e+06	3.89213e+06	7.38851e+06	3.93173e+06	4.0227e+06	4.85744e+06	3.32922e+06	3.78034e+06	4.95454e+06	4.59251e+06	5.29499e+06	5.43512e+06	6.2225e+06	7.26659e+06	4.43459e+06	1.35523e+07	6.58403e+06	2.46956e+06	2.17821e+06	4.09121e+06	0	4.81387e+06	1.00976e+07	1.57e+07	2.30074e+06	8.92835e+06	6.46637e+06	5.47205e+06	0	4.02119e+06	5.29516e+06	7.73614e+06	0	4.53355e+06	8.80546e+06	9.69482e+06	8.55404e+06	2.85042e+06
A0A140TA29	C4a anaphylatoxin	C4B	C4B_2;C4A;C4B;ZA	0	4.25782e+06	0	1.87214e+06	1.84959e+06	0	0	0	0	0	0	2.057e+06	0	1.60431e+06	2.07784e+06	2.7418e+06	0	1.61956e+06	0	0	1.03173e+07	0	0	3.37588e+06	0	0	0	0	0	2.56395e+06	0	0	4.37907e+06	1.98053e+06	0	2.8023e+06	0	1.15971e+07	0	0	0	0	0	1.573e+06	5.70991e+06	0
P04003	C4b-binding protein alpha chain	C4BPA	C4BPA	0	3.48166e+06	9.63322e+06	2.53745e+06	5.44164e+06	6.08994e+06	4.46839e+06	1.21272e+07	5.89158e+06	1.12569e+07	3.98688e+06	6.19773e+06	0	1.20305e+07	9.25748e+06	2.03103e+06	1.21029e+07	2.55485e+07	4.99458e+06	2.73913e+06	5.62205e+06	0	1.21587e+06	2.6587e+06	0	3.15702e+06	4.04946e+06	1.25069e+06	1.8692e+06	2.7153e+06	1.08419e+06	3.39736e+06	4.76519e+06	2.23155e+06	1.5714e+06	2.10289e+06	3.96793e+06	4.96975e+06	1.84654e+06	0	3.29223e+06	2.26372e+06	1.30321e+07	0	0	2.55979e+06
P20851	C4b-binding protein beta chain	C4BPB	C4BPB	1.43258e+07	2.02583e+07	3.47421e+07	5.1478e+07	4.86468e+07	3.26142e+07	5.41759e+07	4.23889e+07	3.35306e+07	1.8481e+07	3.62858e+07	2.38526e+07	9.87291e+06	2.62906e+07	2.2916e+07	3.16801e+07	3.88741e+07	3.76323e+07	1.8227e+07	38484519	2.94646e+07	3.22788e+07	5.32845e+07	3.73926e+07	2.33378e+07	4.697e+07	3.82207e+07	2.55913e+07	2.77149e+07	2.53324e+07	1.31261e+07	3.17072e+07	2.4723e+07	1.16205e+07	2.6964e+07	2.43026e+07	2.04055e+07	2.5333e+07	3.24806e+07	1.68116e+07	2.41968e+07	7.56542e+06	7.4952e+06	1.56376e+07	2.05553e+07	5.99602e+06
Q8N1A6	UPF0462 protein C4orf33	C4orf33	LOC132321;C4orf33	0	0	0	909122	0	0	1.41219e+06	1.74077e+06	0	0	0	0	0	869689	0	1.46243e+06	509215	0	886380	0	0	1.62533e+06	774160	901480	0	0	0	0	0	0	810613	0	0	1.8946e+06	0	0	0	0	0	0	0	0	0	2.35026e+06	0	0
P01031	Complement C5	C5	C5	123765180	1.31566e+08	8.40272e+07	9.23673e+07	9.17024e+07	1.37519e+08	7.44756e+07	8.31812e+07	1.37273e+08	1.23233e+08	8.64389e+07	1.00581e+08	1.96906e+08	8.38122e+07	9.03715e+07	7.55938e+07	1.05602e+08	1.71112e+08	1.02097e+08	9.33495e+07	1.08629e+08	1.45234e+08	1.04079e+08	1.72228e+08	8.39006e+07	181789331	7.25563e+07	1.20554e+08	1.31272e+08	1.24602e+08	1.80014e+08	1.90174e+08	1.1264e+08	1.33651e+08	1.17957e+08	1.84996e+08	9.56734e+07	1.10959e+08	1.01675e+08	1.95629e+08	1.44708e+08	1.16072e+08	544533746	1.22507e+08	1.45708e+08	1.10757e+08
A6NDU8	UPF0600 protein C5orf51	C5orf51	C5orf51	0	4.58452e+06	0	6.34124e+06	0	1.52227e+07	0	4.21314e+06	4.68193e+06	3.16589e+07	992363	1.98634e+06	4.34165e+06	6.6549e+06	3.44879e+06	2.68532e+06	4.61521e+06	7.94857e+06	8.11465e+06	3.50211e+06	3.25983e+06	2.71868e+06	1.80137e+06	5.40301e+06	1.68936e+06	0	2.57173e+06	6.36791e+06	6.98613e+06	8.16902e+06	1.06432e+07	3.50495e+06	4.5098e+06	6.64199e+06	2.3676e+06	2.08528e+06	6.29615e+06	9.52867e+06	7.88492e+06	6.28201e+06	1.176e+06	0	3.15946e+06	0	1.36665e+06	5.72194e+06
P13671	Complement component C6	C6	C6	0	5.9654e+06	3.32933e+06	4.19367e+06	3.58613e+06	3.95681e+06	0	1.121e+06	0	0	948302	2.71618e+06	1.55687e+06	496788	6.11238e+06	0	0	0	0	0	0	0	0	3.08241e+06	1.23359e+06	654258	3.82777e+06	0	0	0	0	0	0	0	0	0	0	1.63958e+06	0	0	0	1.58898e+06	2.02919e+07	0	0	4.20026e+06
A0A024RCY9	Chromosome 6 open reading frame 130, isoform CRA_b	C6orf130	C6orf130;OARD1	0	1.65392e+06	0	2.03232e+06	1.75623e+06	1.63609e+06	0	0	0	449977	557041	2.21075e+06	854696	446932	0	4.45859e+06	402004	2.72989e+06	1.71717e+06	6.80461e+06	907702	1.97618e+06	968136	6.21154e+06	0	558846	0	4.1971e+06	1.10958e+07	0	0	1.36307e+06	3.32803e+06	0	2.41652e+06	1.74175e+06	554061	766516	5.87278e+06	382417	2.88179e+06	964608	548172	704311	1.19625e+06	1.68394e+06
A0A090N7V5	Gamma-glutamylcyclotransferase	C7orf24	C7orf24;GGCT	6.16995e+07	3.27705e+08	108921263	4.01979e+08	4.82308e+08	1.00897e+08	2.4968e+08	1.50583e+08	2.1743e+08	3.18595e+08	2.10417e+08	1.43294e+08	1.60728e+08	3.22444e+08	1.26863e+08	1.43873e+08	4.20403e+08	246778206	9.58923e+07	2.02014e+08	1.98225e+08	1.90041e+08	2.32311e+08	6.95425e+08	9.09011e+07	1.9236e+08	1.91737e+08	1.91231e+08	4.05125e+08	2.50132e+08	2.39063e+08	3.74365e+08	1206796192	8.01232e+07	2.12197e+08	1.67457e+08	2.03331e+08	3.69238e+08	3.69333e+08	1.23926e+08	2.35074e+08	8.09059e+07	4.8903e+07	7.11127e+07	1.25633e+08	6.86534e+07
Q9BRJ6	Uncharacterized protein C7orf50	C7orf50	C7orf50;MGC11257	5.27821e+06	1.61847e+07	2.22744e+07	1.73372e+07	2.29008e+07	1.94254e+07	2.55875e+07	1.39441e+07	1.54443e+07	1.78041e+07	2.71958e+07	2.57266e+07	3.98824e+07	2.13978e+07	1.26837e+07	1.59904e+07	1.28516e+07	2.40213e+07	1.28271e+07	24524989	1.62432e+07	2.05314e+07	7.87792e+06	2.96131e+07	6.54131e+06	1.35208e+07	1.57033e+07	1.48858e+07	3.34237e+07	2.19201e+07	1.94056e+07	1.41641e+07	1.50674e+07	1.09669e+07	1.26143e+07	1.73492e+07	1.66177e+07	1.25201e+07	8.67563e+06	2.59513e+07	1.82099e+07	5.87996e+06	1.61759e+07	1.37142e+07	7.06107e+06	1.757e+07
P07357	Complement component C8 alpha chain	C8A	C8A	1.81348e+07	6.74352e+06	2.49785e+07	1.24631e+07	1.65881e+07	1.37234e+07	1.28853e+07	1.2224e+07	4.72929e+06	1.18732e+07	2.17071e+07	1.13403e+07	9.8863e+06	1.68751e+07	1.31787e+07	5.92026e+06	8.02116e+06	8.98229e+06	1.20962e+07	1.31404e+07	9.67141e+06	1.44266e+07	2.07293e+07	5.23181e+07	1.85745e+07	7.88973e+06	1.4181e+07	1.32726e+06	1.28652e+07	6.81185e+06	7.87957e+06	9.62964e+06	1.16279e+06	1.86763e+07	5.99585e+06	1.93536e+07	1.1607e+07	3.78735e+07	8.66482e+06	9.84914e+06	7.62603e+06	2.21352e+07	1.08927e+08	2.63189e+07	1.61507e+07	1.50769e+07
P07360	Complement component C8 gamma chain	C8G	C8G	1.10433e+08	1.72654e+07	1.55897e+07	1.91658e+07	2.48452e+07	2.6402e+08	2.57235e+07	7.66669e+07	2.61282e+07	2.38644e+07	4.54444e+07	1.36478e+07	1.72399e+08	1.61154e+07	1.88161e+07	1.7881e+07	1.35644e+07	8.37052e+06	2.43911e+07	2.04412e+07	1.59695e+07	2.69177e+07	1.69934e+07	4.77947e+07	5.98736e+07	2.00621e+07	2.2838e+07	1.47571e+07	1.19501e+07	1.79686e+07	3.46317e+07	2.98593e+07	1.29791e+07	2.73911e+07	4.22694e+07	2.21752e+07	2.29339e+07	3.37195e+07	2.25616e+07	4.00821e+07	1.11798e+07	4.14445e+07	1.497e+08	8.49782e+07	6.91214e+07	3.12412e+07
H0YF29	UPF0598 protein C8orf82 (Fragment)	C8orf82	C8orf82	1.18326e+07	7.36948e+06	0	7.24543e+06	8.14042e+06	0	0	0	8.86447e+06	0	0	5.66507e+06	7.15897e+06	9.05663e+06	0	7.85132e+06	0	0	0	1669191	2.65766e+06	0	0	7.37025e+06	0	1.02945e+07	2.34988e+06	0	9.17647e+06	8.4155e+06	2.19973e+06	8.60513e+06	7.22571e+06	0	0	0	0	7.45787e+06	1.91513e+06	0	5.78491e+06	4.07524e+06	0	0	7.9452e+06	0
A0A024R035	Complement component C9	C9	C9	9.07039e+07	1.16828e+08	140642606	1.20169e+08	1.58319e+08	1.16864e+08	1.18692e+08	1.09005e+08	9.23361e+07	6.59939e+07	1.07111e+08	9.58757e+07	2.61875e+08	1.57685e+08	9.21721e+07	7.12812e+07	1.00298e+08	8.17938e+07	1.29708e+08	8.10112e+07	1.17145e+08	8.29219e+07	1.81833e+08	273883150	1.44742e+08	139544599	1.2951e+08	1.20979e+08	7.66876e+07	1.51059e+08	1.06951e+08	1.32126e+08	8.34687e+07	1.28491e+08	8.54125e+07	1.38428e+08	7.31479e+07	1.37251e+08	9.40143e+07	1.91502e+08	8.95777e+07	1.18541e+08	8.8724e+08	1.19977e+08	8.49287e+07	1.99378e+08
A0A024R8E4	Chromosome 9 open reading frame 32, isoform CRA_a	C9orf32	C9orf32;NTMT1	0	9.45323e+06	0	0	0	0	3.74015e+06	0	0	3.87458e+06	7.34687e+06	3.47873e+06	2.80717e+06	1.36268e+06	2.62458e+06	0	0	2.77406e+06	0	0	958685	5.21094e+06	1.11987e+06	2.04056e+06	0	1.61571e+06	2.57551e+06	5.7364e+06	1.41945e+07	3.62124e+06	0	1.34261e+06	8.31526e+06	1.65038e+06	2.01723e+06	6.34593e+06	3.6256e+06	5.57179e+06	5.2566e+06	2.25608e+06	0	0	0	0	0	0
Q8IXQ3	Uncharacterized protein C9orf40	C9orf40	C9orf40	0	0	0	4.70006e+06	0	0	1.1604e+06	3.06698e+06	0	0	1.23302e+06	0	2.36162e+06	0	0	1.83752e+06	0	1.79739e+06	0	1.64013e+06	0	0	1.80811e+06	924360	0	2.82065e+06	0	0	0	0	1.67421e+06	1.59611e+06	0	0	1.76092e+06	1.39739e+06	1.60664e+06	2.01403e+06	1.14675e+06	0	1.29061e+06	2.04367e+06	0	0	2.09824e+06	0
Q5T6V5	Queuosine salvage protein	C9orf64	C9orf64	2.06283e+07	5.4271e+06	2.95498e+06	9.73978e+06	6.17084e+06	3.16639e+06	9.54816e+06	6.56764e+06	7.17593e+06	1.05915e+07	1.37457e+07	1.22214e+07	4.50492e+06	7.27532e+06	8.843e+06	1.30038e+07	8.31898e+06	1.11433e+07	5.60497e+06	1.41794e+07	1.0408e+07	8.19818e+06	8.00914e+06	5.34331e+06	4.54527e+06	6.58598e+06	6.55026e+06	6.01262e+06	1.95421e+07	9.91988e+06	1.71506e+06	1.23707e+07	1.115e+07	1.03746e+06	5.36465e+06	2.99664e+06	1.32335e+07	7.84786e+06	1.60355e+07	7.64246e+06	1.19513e+07	3.60868e+06	6.70958e+06	9.25096e+06	5.76282e+06	1.41277e+06
Q9NZ63	Telomere length and silencing protein 1 homolog	C9orf78	C9orf78	5.60217e+06	8.35142e+06	7.22586e+06	1.02729e+07	7.36131e+06	7712410	1.2498e+07	1.49352e+07	1.03218e+07	8.43268e+06	1.06881e+07	8.96035e+06	7.5718e+06	1.03182e+07	1.23548e+07	9.83185e+06	9.47781e+06	1.35498e+07	7.01543e+06	11276741	4.93871e+06	1.00841e+07	9.69334e+06	8.35601e+06	6.72994e+06	1.07628e+07	1.04045e+07	8.9547e+06	1.10498e+07	8.05212e+06	4.285e+06	9.44466e+06	1.03282e+07	4.87828e+06	5.98e+06	1.1683e+07	8.08238e+06	1.49062e+07	1.55702e+07	8.26666e+06	7.97839e+06	3.91229e+06	4.04232e+06	3.21713e+06	4.78526e+06	5.70294e+06
A0A024R872	Chromosome 9 open reading frame 88, isoform CRA_a	C9orf88	C9orf88;NIBAN2;FAM129B	1048760870	3.70532e+08	1.88346e+08	2.00669e+08	1.49112e+08	1.44153e+08	9.26971e+07	1.07853e+08	267312599	3.8615e+08	2.87028e+08	4.4835e+08	5.74505e+08	3.80447e+08	456186271	4.68747e+08	3.95509e+08	2.00169e+08	4.26021e+08	1.23848e+08	3.57162e+08	1.02418e+08	2.76181e+08	4.63582e+08	7.39517e+08	1.42163e+08	3.93519e+08	8.48076e+08	173838055	5.64705e+08	8.3384e+08	8.67281e+08	3.20337e+08	1338251961	6.29438e+08	1034865637	5.77664e+08	3.98112e+08	1.70838e+08	5.57338e+08	8.51298e+08	1573819501	1024868353	1356527890	1327061020	1213732227
A0A024R248	Chromosome 9 open reading frame 89, isoform CRA_b	C9orf89	CARD19;C9orf89	4.0162e+06	3.08555e+06	4.34344e+06	2.72377e+06	0	3.42306e+06	3.56054e+06	2.29887e+06	560511	2.88018e+06	2.90404e+06	3.10667e+06	0	2.74966e+06	3.60177e+06	7.33863e+06	2.21016e+06	4.16968e+06	1.18379e+06	4.52098e+06	1.07483e+06	2.58999e+06	0	3.03358e+06	1.18792e+06	2.77715e+06	2.97711e+06	2.3123e+06	5.61071e+06	864768	0	6.10845e+06	4.45153e+06	0	0	1.16051e+06	3.24825e+06	2.9706e+06	4.2646e+06	1.49828e+06	2.34716e+06	2.02048e+06	0	582023	0	0
B3KUB4	Carbonic anhydrase	CA12	CA12	0	0	0	0	270905	0	0	686940	0	0	0	0	0	0	0	475650	0	0	0	0	0	714152	0	0	0	0	901611	0	0	0	0	0	0	0	1.21786e+06	0	0	0	0	0	0	0	0	0	0	0
Q8N1Q1	Carbonic anhydrase 13	CA13	CA13	3.20994e+07	1.07709e+07	2.07577e+07	2.54686e+07	9.61658e+06	3.23556e+07	1.48888e+07	1.93658e+07	3.03941e+07	2.06798e+07	1.04089e+07	2.04744e+07	1.74289e+07	2.20858e+07	1.57825e+07	1.23259e+07	4.73904e+07	2.14091e+07	3.50794e+07	6.45664e+07	2.10393e+07	2.23133e+07	2.23972e+07	3.4928e+07	2.69451e+07	1.62151e+07	1.03121e+07	8.40751e+06	0	3.5722e+07	3.82492e+07	1.71856e+07	3.92108e+07	3.85398e+07	4.42582e+06	2.89147e+07	2.00457e+07	7.55884e+06	3.85495e+07	1.88528e+07	4.07762e+06	1.49186e+07	2.77388e+07	2.27855e+07	3.37448e+07	9.33692e+06
P00918	Carbonic anhydrase 2	CA2	HEL-S-282;CA2	915370963	1.61199e+08	3.18069e+08	1.8163e+08	1.32123e+08	2.94187e+08	1.56415e+08	3.51849e+08	2.76013e+08	1.43987e+08	1.31703e+08	2.01359e+08	1.92054e+08	2.27624e+08	2.49165e+08	1.65109e+08	284277698	664119011	3.5441e+08	2.9155e+08	2.01498e+08	7.95606e+07	1.47067e+08	9.34947e+07	4.55542e+08	207395539	2.88792e+08	2.82713e+08	8.70585e+07	1.67583e+08	4.57594e+08	2.36975e+08	1.38353e+08	584782202	4.08803e+08	3.66991e+08	1.08502e+08	5.06531e+07	125872320	2.69697e+08	2.30965e+08	5.33992e+08	4.31254e+08	4.92023e+08	4.14615e+08	3.84858e+08
A0A024R825	Carbonic anhydrase	CA3	CA3	4.93164e+06	1.41169e+06	1.93635e+06	5.45385e+06	3.77821e+06	1.40162e+06	2.97124e+06	3.32917e+06	5.01317e+06	3.88075e+06	4.49831e+06	1.70413e+06	1.35257e+07	7.79927e+06	2.78484e+06	5.05882e+06	1.04546e+06	5.42226e+06	1.59155e+07	1.11368e+06	6.94741e+06	3.61081e+06	0	3.62588e+06	0	1.25321e+06	1.58905e+06	4.44379e+06	0	2.07531e+06	2.07321e+06	0	8.81506e+06	5.81851e+06	0	3.65059e+06	5.79554e+06	4.7675e+06	1.89804e+06	2.97174e+07	3.43762e+06	1.82351e+06	6.33287e+06	5.8124e+06	2.22045e+06	0
P07451	Carbonic anhydrase 3	CA3	CA3	9.09345e+06	4.93748e+06	1.29645e+07	1.2154e+07	8.68414e+06	4.43573e+06	3.02609e+06	0	3.57328e+06	1.77671e+06	2.04377e+07	1.98019e+07	1.49745e+07	7.10765e+06	4.92457e+06	8.43521e+06	5.3963e+06	5.06045e+06	2.29043e+06	5112497	9.98651e+06	0	3.28364e+07	4.57377e+07	1.77471e+07	7.53211e+06	1.10824e+07	6.77588e+06	0	8.58099e+06	0	7.90723e+06	3.52708e+06	18947404	2.06576e+07	9.40408e+06	8.86233e+06	6.60094e+06	1.04303e+07	2.11209e+07	8.63671e+06	2.78877e+07	1.67151e+07	9.93791e+06	8.22551e+06	1.75395e+07
P22748	Carbonic anhydrase 4	CA4	CA4	5.12357e+07	1.10977e+08	2.2454e+08	1.08984e+08	8.68219e+07	2.0193e+08	8.55597e+07	7.25932e+07	9.99174e+07	7.87355e+07	6.82133e+07	9.39946e+07	8.74167e+07	1.76767e+08	7.26697e+07	7.27718e+07	9.95296e+07	80643904	118432695	8.30875e+07	1.32023e+08	101117894	5.10726e+07	9.63668e+07	2.62493e+08	1.31103e+08	2.48763e+08	1.63928e+08	1.60209e+08	1.00221e+08	8.20773e+07	1.10913e+08	1.29473e+08	108451825	7.32795e+07	8.66199e+07	9.1112e+07	7.09163e+07	1.72044e+08	1.17212e+08	8.41288e+07	1.61812e+08	7.78765e+07	2.93454e+08	1.6774e+08	6.75428e+07
P35219	Carbonic anhydrase-related protein	CA8	CA8	0	0	0	832816	1.19811e+06	0	1.59502e+06	768231	0	1.61169e+06	1.05638e+06	0	0	0	1.0162e+06	0	0	1.4632e+06	0	0	784680	0	0	2.52887e+06	0	0	0	0	0	777654	0	0	0	0	0	0	899751	0	0	0	974959	0	0	0	0	0
A0A0S2Z3D0	Carbonic anhydrase (Fragment)	CA9	CA9	4.76875e+06	1.20965e+07	3.08308e+06	7.29294e+06	5.7491e+06	5.12541e+06	5.77831e+06	5.73337e+06	4.88193e+06	7.7761e+06	1.29062e+07	4.89007e+06	4.41168e+06	5.52549e+06	5.55139e+06	6.10331e+06	5.48556e+06	7.40582e+06	1.09508e+07	1.25609e+07	7.50015e+06	1.07277e+07	6.62296e+06	5.0689e+06	6.07505e+06	8.10666e+06	1.04684e+07	6.47715e+06	1.49973e+07	5.7438e+06	2.72408e+06	8.83739e+06	5.49101e+06	2.19748e+06	4.88648e+06	6.16393e+06	6.83708e+06	1.82727e+07	2.11417e+07	6.97816e+06	4.81543e+06	6.58686e+06	4.02551e+06	4.31758e+06	1.6296e+06	3.52166e+06
Q9H8G2	Caspase activity and apoptosis inhibitor 1	CAAP1	CAAP1	3.60472e+07	1.03773e+08	9.30413e+07	1.78607e+08	1.27936e+08	6.5716e+07	1.46145e+08	1.27996e+08	4.62472e+07	1.6736e+08	8.45774e+07	1.50015e+08	1.1157e+08	1.21243e+08	8.35557e+07	1.07504e+08	9.51964e+07	1.0338e+08	6.86772e+07	9.72567e+07	6.71081e+07	1.06461e+08	1.64078e+08	4.4815e+07	6.44291e+07	9.55303e+07	5.85626e+07	1.18481e+08	1.43184e+08	7.12517e+07	4.84989e+07	6.54912e+07	1.2071e+08	2.29768e+07	106676478	7.4055e+07	1.0164e+08	4.38205e+07	8.98512e+07	1.40186e+08	1.17249e+08	3.20162e+07	2.53054e+07	2.70542e+07	4.44127e+07	4.53757e+07
Q9Y376	Calcium-binding protein 39	CAB39	CAB39L;CAB39;MO25	9.6962e+07	1.84507e+08	1.44496e+08	2.1133e+08	2.16785e+08	1.43746e+08	2.79123e+08	1.47427e+08	1.86913e+08	2.1834e+08	207862104	1.35686e+08	1.63265e+08	1.64386e+08	1.33532e+08	2.04385e+08	1.39459e+08	1.92174e+08	1.3506e+08	3.57254e+08	2.2394e+08	2.60251e+08	1.36343e+08	174576812	1.74104e+08	2.86422e+08	2.57651e+08	1.61479e+08	3.47667e+08	1.65618e+08	1.3443e+08	1.74002e+08	2.07456e+08	1.05403e+08	2.00949e+08	1.12857e+08	1.80538e+08	2.31375e+08	3.32449e+08	1.70468e+08	1.39011e+08	103791157	133198309	1.44765e+08	1.51544e+08	1.306e+08
Q5VU97	VWFA and cache domain-containing protein 1	CACHD1	CACHD1	0	4.67775e+06	3.54839e+06	4.28159e+06	4.51663e+06	0	7.08111e+06	1.52302e+06	5.42396e+06	4.36669e+06	4.39189e+06	2.84059e+06	2.66449e+06	6.10338e+06	8.26692e+06	6.00967e+06	5.55457e+06	6.89776e+06	0	7.00959e+06	5.55813e+06	7.47273e+06	0	1.16142e+07	2.40725e+06	4.35196e+06	6.61628e+06	5.30608e+06	9.32727e+06	6.32777e+06	3.22971e+06	5.37948e+06	6.55421e+06	0	0	5.09e+06	4.76452e+06	4.40687e+06	8.51062e+06	4.09316e+06	6.06419e+06	1.68341e+06	1.5979e+06	618219	1.42787e+06	0
P54289	Voltage-dependent calcium channel subunit alpha-2/delta-1	CACNA2D1	CACNA2D2;WUGSC:H_DJ0560O14.1;CACNA2D1	3.15405e+07	3.08658e+07	3.41772e+07	4.40912e+07	4.72713e+07	3.65169e+07	3.62242e+07	5.52465e+07	3.05217e+07	2.9477e+07	3.46511e+07	2.78984e+07	3.27956e+07	3.11093e+07	3.26825e+07	1.95865e+07	2.14914e+07	3.70366e+07	1.69109e+07	4.65887e+07	6.72948e+07	2.98864e+07	4.27498e+07	1.53957e+07	4.98196e+07	6.92659e+07	4.79902e+07	1.76001e+07	2.15098e+07	3.04851e+07	29161897	2.67217e+07	1.99335e+07	39688395	6.22007e+07	1.1564e+07	2.28648e+07	2.44559e+07	2.72891e+07	1.61349e+07	3.16381e+07	3.75067e+07	7.49169e+06	3.70669e+07	3.44394e+07	2.51937e+07
Q9NY47	Voltage-dependent calcium channel subunit alpha-2/delta-2	CACNA2D2	CACNA2D2;CACNA2D1	1.5562e+07	6.68031e+07	3.60917e+07	5.85644e+07	4.81926e+07	4.43548e+07	5.09244e+07	4.44907e+07	3.46382e+07	5.92113e+07	6.04911e+07	2.51617e+07	5.04261e+07	5.40466e+07	2.91736e+07	4.45213e+07	3.5317e+07	4.3846e+07	3.3115e+07	5.37343e+07	5.7027e+07	5.24786e+07	2.89318e+08	4.39417e+07	4.12882e+07	6.97412e+07	7.2756e+07	3.52387e+07	3.71274e+07	4.4011e+07	3.77162e+07	3.64057e+07	5.02989e+07	3.07337e+07	4.14102e+07	3.46661e+07	3.96097e+07	5.27982e+07	4.35703e+07	4.1272e+07	5.32905e+07	3.19741e+07	3.67084e+07	3.43001e+07	2.8276e+07	2.7473e+07
K7EQE3	Cactin (Fragment)	CACTIN	CACTIN	0	0	0	909768	1.40332e+06	0	1.29068e+06	0	0	0	1.50054e+06	0	1.02996e+06	0	0	0	0	0	0	2.53993e+06	0	0	0	0	0	1.45779e+06	0	0	0	0	0	0	0	0	0	0	0	0	0	0	1.36848e+06	0	0	0	0	0
Q9HB71	Calcyclin-binding protein	CACYBP	CACYBP;APOA1	5.7198e+07	1.97483e+08	8.19958e+07	1.74824e+08	1.87616e+08	1.56719e+08	1.19007e+08	1.20198e+08	221270805	2.67823e+08	2.36312e+08	1.77523e+08	1.1365e+08	1.4689e+08	1.80784e+08	2.37097e+08	1.19807e+08	1.95292e+08	1.27818e+08	2.25642e+08	1.8402e+08	1.72512e+08	1.83876e+08	1.78796e+08	8.58801e+07	7.31807e+07	7.78422e+07	1.72739e+08	4.35655e+08	2.09378e+08	1.09639e+08	2.53333e+08	2.69083e+08	7.08021e+07	1.13642e+08	1.80991e+08	2.20092e+08	213869187	3.97551e+08	2.06579e+08	1.38298e+08	72800927	8.88019e+07	5.24801e+07	7.60816e+07	1.1343e+08
P27708	CAD protein	CAD	CPS1;CAD	1.28197e+08	2.52547e+08	9.39649e+07	1.47652e+08	1.53671e+08	1.4332e+08	1.46939e+08	123701867	1.98895e+08	2.33239e+08	1.78121e+08	1.55297e+08	1.53069e+08	1.36287e+08	1.71314e+08	2.13098e+08	1.83486e+08	3.08771e+08	1.3145e+08	1.84546e+08	9.98699e+07	1.4052e+08	2.22287e+08	2.29698e+08	1.50964e+08	1.05686e+08	9.70499e+07	1.88256e+08	3.57649e+08	1.71186e+08	1.35413e+08	3.55441e+08	3.00828e+08	1.20897e+08	1.15127e+08	1.83227e+08	2.01897e+08	2.66379e+08	318420339	218752987	2.44641e+08	1.12494e+08	1.11929e+08	1.09085e+08	1.37776e+08	9.75222e+07
X5D8W0	Cell adhesion molecule 1 isoform D (Fragment)	CADM1	CADM1;DKFZp686F1789	3.13219e+07	3.34837e+07	3.07866e+07	4.23698e+07	4.01421e+07	2.56442e+07	4.49314e+07	3.43841e+07	4.86017e+07	3.82803e+07	3.33767e+07	2.22539e+07	2.99635e+07	4.19074e+07	2.69798e+07	3.99326e+07	2.78756e+07	3.08908e+07	3.65895e+07	5.54768e+07	4.65417e+07	3.76025e+07	3.1977e+07	2.55792e+07	4.16436e+07	5.31346e+07	4.75708e+07	3.51793e+07	3.89644e+07	3.77625e+07	3.138e+07	3.25535e+07	4.12924e+07	2.16082e+07	3.18926e+07	3.03984e+07	3.47286e+07	3.43436e+07	4.65124e+07	3.87901e+07	4.68216e+07	1.95594e+07	1.89646e+07	2.35879e+07	3.13371e+07	2.36138e+07
A0A0C4DG09	Cell adhesion molecule 3 (Fragment)	CADM3	CADM3	0	732431	951494	635151	476833	0	0	5.24358e+06	0	2.76866e+06	0	0	0	0	0	0	0	0	0	798558	0	1.2554e+06	1.06795e+06	0	0	0	0	0	902799	0	0	1.478e+06	3.06432e+06	0	0	0	0	0	1.41324e+06	0	866105	1.05354e+06	0	738575	944784	0
Q8NFZ8	Cell adhesion molecule 4	CADM4	CADM4	0	0	0	2.86158e+06	0	3.37806e+06	1.92138e+06	2.25177e+06	0	3.83054e+06	1.63968e+06	2.42511e+06	0	3.68247e+06	3.29885e+06	0	2.74218e+06	4.53477e+06	4.47609e+06	1.90006e+06	0	0	0	2.42897e+06	0	1.99775e+06	0	0	0	0	3.95514e+06	3.2241e+06	0	3.73831e+06	2.16605e+06	0	0	4.87209e+06	3.83271e+06	0	1.78082e+06	0	1.3333e+06	0	0	0
F1T0E5	Calcium-dependent secretion activator 1	CADPS	CADPS2;CADPS	3.24304e+06	8.23627e+06	1.13328e+07	1.90189e+07	1.74951e+07	1.02754e+07	1.5624e+07	7.81516e+06	7.85329e+06	1.03168e+07	1.15112e+07	4.24722e+06	1.21382e+07	1.16928e+07	1.22875e+07	1.0075e+07	5.28899e+06	6.21902e+06	1.23477e+07	1.40639e+07	2.46175e+07	2.59249e+07	7.7012e+06	1.03511e+07	8.74607e+06	1.14943e+07	2.42511e+07	1.42991e+07	7.88138e+06	1.11266e+07	2.83222e+06	1.15131e+07	1.52114e+07	1.62356e+06	2.74575e+06	9.66017e+06	1.81279e+07	4.84713e+06	9.25167e+06	1.57685e+07	1.01238e+07	3.23391e+06	8.95091e+06	7.15717e+06	6.59603e+06	8.57318e+06
X5D8W6	Ca++-dependent secretion activator 2 isoform C (Fragment)	CADPS2	CADPS2;CADPS	1.74155e+07	0	0	1.67076e+06	819349	720224	0	0	1.72124e+07	8.25789e+06	9.65339e+06	1.34169e+07	0	0	0	850666	1.66051e+07	3.7967e+06	1.57368e+07	0	2.16162e+06	0	0	9.39242e+06	0	903592	921581	1.15872e+07	9.39692e+06	8.1724e+06	1.1704e+07	0	5.49056e+06	2.0241e+07	6.65803e+06	1.53382e+07	1.69093e+07	1.34708e+07	3.96118e+06	0	9.51643e+06	0	1.17895e+07	7.65149e+06	1.06007e+07	3.59474e+07
Q13137	Calcium-binding and coiled-coil domain-containing protein 2	CALCOCO2	CALCOCO2	3.46399e+06	1.25149e+07	2.42921e+06	3.47404e+06	3.46093e+06	9.26792e+06	3.11336e+07	1.12058e+07	9.36098e+06	9.08074e+06	6.98075e+06	9.74363e+06	0	2.91495e+06	8.1414e+06	3.7872e+06	2.97839e+06	1.024e+07	6.45475e+06	0	3.65459e+06	1.87424e+06	2.49072e+06	1.74276e+07	840938	2.79826e+06	5.92937e+06	4.88784e+06	6.78182e+06	3.83263e+06	1.00686e+07	7.97205e+06	6.69588e+06	2.40825e+06	0	5.25773e+06	6.27484e+06	7.02497e+06	1.50932e+07	4.60005e+06	1.08331e+07	9.66602e+06	3.54742e+06	0	0	2.42979e+06
Q16602	Calcitonin gene-related peptide type 1 receptor	CALCRL	CALCRL	4.41509e+07	2.27619e+07	7.52456e+07	2.45392e+07	2.81265e+07	4.19273e+07	2.3374e+07	4.11763e+07	3.2762e+07	1.0945e+07	1.44738e+07	2.49051e+07	2.8294e+07	3.02592e+07	3.21792e+07	2.55716e+07	4.28223e+07	3.29939e+07	4.35017e+07	1.55307e+07	3.58103e+07	2.10315e+07	2.51686e+07	1.39565e+07	5.04077e+07	3.97764e+07	4.81718e+07	2.69209e+07	9.73573e+06	2.58773e+07	4.26584e+07	1.99806e+07	1.46243e+07	4.0199e+07	2.92695e+07	2.71806e+07	1.53502e+07	7.86922e+06	1.48364e+07	2.812e+07	2.62073e+07	5.07891e+07	3.11613e+07	5.27958e+07	2.67708e+07	3.24332e+07
Q05682	Caldesmon	CALD1	DKFZp779D0769;DKFZp686P03208;CALD1	2.22574e+07	1.07479e+07	2.24648e+07	3.27056e+07	2.33326e+07	2.11032e+07	2.0361e+07	1.6153e+07	1.82957e+07	2.96772e+07	2.51489e+07	1.79493e+07	3.37669e+07	2.27661e+07	1.71753e+07	2.02587e+07	1.81937e+07	1.75788e+07	2.46197e+07	2.23964e+07	2.83521e+07	1.68654e+07	1.16255e+07	2.08979e+07	2.20326e+07	3.8828e+07	2.47429e+07	2.72633e+07	1.21653e+07	1.88631e+07	3.26237e+07	1.57318e+07	2.52025e+07	1.93563e+07	2.48012e+07	1.29961e+07	3.06241e+07	1.06302e+07	3.32642e+07	2.60786e+07	3.23846e+07	2.08376e+07	8.60111e+06	3.12181e+07	2.09936e+07	2.14616e+07
E7EX44	Caldesmon	CALD1	DKFZp779D0769;DKFZp686P03208;CALD1	0	5.72923e+06	0	0	857024	0	0	583839	0	2.33206e+06	0	1.97085e+06	1.18046e+06	1.71639e+06	0	0	0	0	3.52195e+06	1.13292e+06	1.27679e+06	1.77621e+06	1.14556e+07	2.72537e+06	842856	0	0	1.44241e+06	4.38612e+06	0	0	2.1513e+06	4.96041e+06	0	4.2808e+06	2.42383e+06	0	0	4.26783e+06	3.75973e+06	2.78503e+06	2.83696e+06	0	1.61428e+06	930810	1.3065e+06
A0A140VKA0	Caldesmon 1, isoform CRA_i	CALD1	DKFZp779D0769;DKFZp686P03208;CALD1	0	1.52557e+07	0	0	0	0	0	1.50424e+06	0	4.09381e+06	0	1.73556e+06	0	0	0	0	0	0	0	15988882	0	0	0	0	0	0	0	0	5.6812e+06	0	0	0	0	0	0	0	6.96516e+06	0	0	0	0	0	0	0	0	0
C9JE79	Caldesmon (Fragment)	CALD1	CALD1	0	0	0	0	0	0	0	0	0	0	0	0	0	0	0	0	0	0	0	0	0	0	0	0	0	0	0	0	0	0	0	0	0	0	0	0	0	0	0	0	0	0	0	0	0	0
Q8N5C1	Calcium homeostasis modulator protein 5	CALHM5	CALHM5	0	466669	6.13867e+06	1.46753e+06	6.48835e+06	6.27113e+06	3.71061e+06	4.83497e+06	1.28393e+06	738446	3.64519e+06	3.28396e+06	2.5494e+06	2.81869e+06	2.60036e+06	4.33105e+06	4.90463e+06	4.14971e+06	796304	6.58078e+06	5.57665e+06	1.36248e+06	0	847640	3.89409e+06	2.35853e+06	3.60866e+06	888480	1.00148e+06	1.96233e+06	874384	0	786494	0	1.37851e+06	2.74672e+06	0	1.76884e+06	0	3.03391e+06	0	2.6346e+06	371242	0	7.17072e+06	1.09765e+06
Q5R3K3	Calcium homeostasis modulator protein 6	CALHM6	CALHM6	0	0	0	0	0	0	0	0	0	0	0	0	0	0	0	0	0	0	1.21534e+06	0	1.04242e+06	638410	0	0	0	0	829639	0	919946	0	729532	0	0	0	0	0	0	0	2.01111e+06	0	0	0	0	0	0	0
P27482	Calmodulin-like protein 3	CALML3	CALML3;CALM2;CALM3;TNNC2;CALM1	0	0	0	2.82996e+06	0	0	0	878663	0	0	3.4571e+06	0	0	0	0	0	0	0	2.57585e+06	0	0	0	2.16021e+06	0	2.2479e+06	0	0	0	1.40527e+07	0	0	0	0	0	0	0	0	0	890424	0	3.29371e+06	0	0	0	1.5685e+06	0
K7EJB9	Calreticulin (Fragment)	CALR	HEL-S-99n;CALR	2.73148e+06	683737	1.36377e+06	2.09458e+06	1.85296e+06	2.06865e+06	2.63835e+06	3.68195e+06	1.83273e+06	502870	0	0	0	0	0	1.26208e+06	1.55944e+06	1.77454e+06	0	2.58061e+06	3.47832e+06	1.80459e+06	5.44996e+06	969949	4.65423e+06	6.0646e+06	3.25232e+06	967771	931464	0	2.32065e+06	1.36894e+06	0	1.57668e+06	6.14719e+06	0	0	1.91784e+06	694609	0	0	2.47613e+06	3.41905e+06	3.42352e+06	3.07101e+06	983434
O43852	Calumenin	CALU	CALU	5.9355e+06	8.12336e+07	3.00027e+07	4.15854e+07	4.12424e+07	6.28267e+07	3.32723e+07	3.69783e+07	3.2761e+07	9.69429e+07	5.73584e+07	8.33903e+07	2.23821e+07	3.3653e+07	4.8278e+07	6.33848e+07	2.39853e+07	4.0975e+07	1.43785e+07	6.07568e+07	2.6033e+07	6.09779e+07	1.46376e+08	6.39212e+07	2.50051e+07	3.47989e+07	3.62837e+07	5.81845e+07	4.55296e+07	4.14042e+07	3.06464e+07	3.43681e+07	4.70992e+07	7.63578e+06	1.61416e+07	3.07993e+07	4.08009e+07	5.1404e+07	8.5751e+07	5.29343e+07	1.48744e+07	9.13122e+06	1.61641e+07	1.10695e+07	1.66716e+07	1.35231e+07
A0A024R755	Calumenin	CALU	CALU	0	4.55444e+06	0	1.52839e+07	5.51533e+06	1.52083e+06	2.10944e+06	0	0	1.50499e+07	9.35098e+06	1.47233e+07	6.67356e+06	4.62316e+06	2.99637e+06	1.34878e+07	1.72997e+06	3.72554e+06	9.32649e+06	1.41448e+07	1.92207e+06	3.54875e+06	3.23694e+07	1.15083e+07	2.85551e+06	2.94106e+06	2.15426e+06	1.53555e+07	7.64944e+06	5.08428e+06	0	9.36769e+06	2.18269e+07	2.58718e+06	9.02367e+06	9.55489e+06	9.10177e+06	6.29151e+06	8.92507e+06	9.52314e+06	5.49818e+06	4.27903e+06	2.14642e+06	7.26791e+06	4.74263e+06	4.23143e+06
B0YIY3	Calcium/calmodulin-dependent protein kinase I, isoform CRA_a	CAMK1	CAMK1;CAMK1D	1.11114e+06	1.40332e+06	4.89465e+06	2.51885e+06	1.05908e+07	9.74686e+06	2.72728e+06	1.48275e+06	2.09534e+06	1.8674e+06	3.01498e+06	4.39979e+06	0	1.81842e+06	0	910231	0	0	0	4.7087e+06	3.22573e+06	3.13809e+06	4.24411e+06	957415	9.54222e+06	1.81354e+06	1.3038e+07	1.69831e+06	0	798296	0	4.59787e+06	951368	1.25218e+06	0	2.84243e+06	3.28002e+06	1.21888e+06	0	0	4.65351e+06	1.48529e+06	853386	6.11759e+06	2.34153e+06	0
Q8IU85	Calcium/calmodulin-dependent protein kinase type 1D	CAMK1D	CAMK1;CAMK1D	4.19034e+06	6.76699e+06	3.5104e+06	7.70448e+06	6.01015e+06	6.61601e+06	1.40509e+07	3.041e+06	2.68305e+07	2.08946e+07	1.23779e+07	3.68438e+07	8.16222e+06	4.81604e+06	2.70556e+07	1.87565e+07	9.97203e+06	1.23964e+07	7.3053e+06	8.75819e+06	9.42949e+06	3.85248e+06	1.31529e+07	3.32654e+06	1.90414e+07	1.74347e+07	6.27642e+06	5.64019e+06	1.40939e+07	5.44586e+06	1.75347e+07	8.64904e+06	1.24106e+07	6.10677e+06	7.82353e+06	6.72278e+06	3.93431e+06	7.83183e+06	1.25216e+07	3.92674e+06	5.28068e+06	2.36483e+06	8.57224e+06	3.94103e+06	4.7518e+06	3.20039e+06
E9PBG7	Calcium/calmodulin-dependent protein kinase	CAMK2D	CAMK2D;CAMK2G;CAMK2A;CAMK2B	1.2922e+07	2.00767e+07	3.26349e+06	9.33158e+06	1.25931e+07	4.72444e+06	1.90506e+07	9.76387e+06	7.62659e+06	2.50195e+07	1.88315e+07	1.09463e+07	1.4629e+07	1.31492e+07	1.32032e+07	1.32141e+07	5.42508e+06	8.57494e+06	8.11743e+06	10403204	1.06949e+07	1.99262e+07	1.97696e+07	1.86375e+07	3.83348e+06	7.43738e+06	6.58234e+06	2.57266e+07	3.3113e+07	1.9134e+07	6.8786e+06	1.94561e+07	3.64877e+07	4.97807e+06	6.61693e+06	1.89262e+07	2.81156e+07	4.22352e+07	3.95266e+07	1.85568e+07	2.12336e+07	5.5253e+06	1.9242e+07	1.30757e+07	9.7829e+06	1.10086e+07
Q5SWX3	Calcium/calmodulin-dependent protein kinase	CAMK2G	CAMK2D;CAMK2G;CAMK2A;CAMK2B	2.16845e+06	4.90018e+06	4.34052e+06	9.25723e+06	6.18169e+06	2.36409e+06	3.39143e+06	2.92215e+06	1.14031e+07	5.78265e+06	1.75781e+06	4.36339e+06	6.37942e+06	4.00628e+06	6.54665e+06	4.12265e+06	2.17688e+06	2.64401e+06	3.4017e+06	6.15761e+06	9.98719e+06	6.70681e+06	4.82181e+06	3.33511e+06	3.37541e+06	5.70451e+06	7.27413e+06	7.2365e+06	1.05671e+07	7.39164e+06	1.23639e+06	4.59025e+06	4.22211e+06	989450	7.1892e+06	2.41155e+06	3.98434e+06	1.34898e+06	1.45063e+07	6.95312e+06	9.53758e+06	1.2736e+06	2.89034e+06	6.25315e+06	5.11211e+06	3.30594e+06
Q08AD1	Calmodulin-regulated spectrin-associated protein 2	CAMSAP2	CAMSAP2	0	1.38908e+06	34985.1	0	1.27959e+06	0	0	129849	1.06951e+06	767339	0	640714	0	1.46662e+06	0	1.25313e+06	0	766541	2.11205e+06	1.34255e+06	997057	822401	0	881218	664747	0	0	1.62383e+06	4.20068e+06	0	2.08762e+06	0	0	583328	0	0	0	363108	385531	0	0	0	0	0	0	0
Q9P1Y5	Calmodulin-regulated spectrin-associated protein 3	CAMSAP3	CAMSAP3;hCG_2004001	1.0425e+07	0	4.23109e+06	945084	356229	498541	0	0	459365	0	345118	7.0167e+06	0	0	8.38645e+06	1.12562e+06	860768	0	0	1.83727e+06	0	0	0	0	0	0	0	0	1.66771e+06	7.89227e+06	0	4.13822e+06	0	0	0	0	5.77093e+06	4.57437e+06	0	4.21497e+06	7.29992e+06	3.18408e+06	3.23451e+06	2.21834e+06	0	0
Q86VP6	Cullin-associated NEDD8-dissociated protein 1	CAND1	CAND2;CAND1	4.07302e+08	310720688	3.47347e+08	5.00566e+08	3.28682e+08	5.08804e+08	4.12617e+08	5.87841e+08	5.98838e+08	2119046667	3.59029e+08	3.58833e+08	2.41104e+08	4.00848e+08	3.86944e+08	3.5078e+08	2.5982e+08	4.61714e+08	3.87541e+08	5.03414e+08	4.5629e+08	4.95435e+08	4.18404e+08	3.79026e+08	3.63339e+08	4.5521e+08	5.27411e+08	3.13274e+08	5.38522e+08	3.51456e+08	3.6699e+08	3.47677e+08	4.40483e+08	392967729	5.99184e+08	2.39414e+08	2.71395e+08	3.69344e+08	4.43756e+08	3.89108e+08	3.48801e+08	2.79372e+08	3.24945e+08	3.60477e+08	3.37612e+08	2.82967e+08
A0A024R8U8	Calcium activated nucleotidase 1, isoform CRA_b	CANT1	CANT1	0	9.20453e+06	4.84907e+06	941779	0	845679	1.792e+06	1.55318e+06	3.92194e+06	8.08759e+06	3.35646e+06	3.51597e+06	1.2124e+07	1.0174e+07	3.36903e+06	3.11102e+06	4.21724e+06	2.25191e+06	6.76929e+06	4.32782e+06	507940	1.83447e+06	5.81984e+06	3.5688e+07	1.41577e+06	3.62954e+06	0	2.00678e+06	4.58852e+06	4.62123e+06	0	1.26269e+07	2.35703e+06	1.71906e+06	0	1.89763e+06	579920	1.56965e+06	570424	955532	0	5.86675e+06	603921	0	5.44171e+06	3.38698e+06
P27824	Calnexin	CANX	CANX	2.25982e+08	1029333885	5.05413e+08	7.17385e+08	5.855e+08	592495932	6.82742e+08	9.90368e+08	9.21536e+08	9.46108e+08	1147276957	8.46597e+08	2094347818	8.86973e+08	7.48206e+08	8.79486e+08	5.88591e+08	8.19622e+08	6.03393e+08	5.83519e+08	4.97058e+08	798828867	1022497969	9.64014e+08	3.6828e+08	6.28541e+08	5.5295e+08	8.5902e+08	6.42337e+08	8.41777e+08	1251922847	652042425	1300134405	6.75233e+08	9.93413e+08	1234548006	1460641928	1228064631	7.45302e+08	1356986298	1196592818	3.72574e+08	1082474096	6.85925e+08	3.88984e+08	1019784818
D6RB85	Calnexin (Fragment)	CANX	CANX	6.58329e+06	1.11539e+07	1.57605e+07	1.9842e+07	1.27815e+07	1.44756e+07	1.55925e+07	2.07387e+07	2.59294e+07	5.93081e+06	1.76762e+07	1.60654e+07	3.81969e+06	1.77277e+07	1.78084e+07	0	1.83147e+07	6.52346e+06	1.24279e+07	27303042	2.01291e+07	3.04259e+07	3.32097e+07	2.16981e+07	1.88196e+07	2.02367e+07	1.65876e+07	13835063	2.98665e+06	10677691	9.47986e+06	1.58988e+07	1.4793e+07	4.29918e+06	5.88134e+06	1.20115e+07	8.66148e+06	1.31401e+07	2.18343e+07	9.01973e+06	8.79846e+06	1.31868e+07	5.91938e+06	6.73864e+06	7.42433e+06	7.5515e+06
D3DPU2	Adenylyl cyclase-associated protein	CAP1	DKFZp686D0714;CAP1;CAP2	1.12568e+08	1.75334e+08	7.10133e+07	1.9509e+08	1.53431e+08	9.36631e+07	2.16257e+08	1.69046e+08	1.55688e+08	2.04674e+08	2.35341e+08	1.36697e+08	106738083	1.86451e+08	2.1211e+08	1.96113e+08	1.47367e+08	9.41315e+07	1.21847e+08	2.88132e+08	2.05216e+08	2.0964e+08	2.28665e+08	1.17069e+08	9.18788e+07	2.01397e+08	1.72112e+08	1.73654e+08	1.73646e+08	141425664	8.44329e+07	2.0437e+08	213314916	8.46537e+07	1.26086e+08	1.44789e+08	2.14291e+08	1.8969e+08	193150914	1.59557e+08	1.70784e+08	8.69982e+07	1.16258e+08	9.77065e+07	1.19343e+08	1.00348e+08
P40121	Macrophage-capping protein	CAPG	CAPG	2.94684e+08	6.495e+08	3.00066e+08	8.41873e+08	4.97035e+08	2.44527e+08	4.59183e+08	4.22499e+08	5.49865e+08	7.09206e+08	9.22248e+08	7.81875e+08	5.92196e+08	5.39061e+08	7.86443e+08	7.13935e+08	4.09455e+08	4.46037e+08	4.5579e+08	6.09976e+08	721982562	5.30896e+08	5.18763e+08	3.26546e+08	3.24819e+08	3.80834e+08	4.34413e+08	1278342247	5.30776e+08	7.03545e+08	4.81018e+08	8.74095e+08	1117245522	4.8081e+08	5.06889e+08	9.24242e+08	1486863610	9.31315e+08	1201582268	1608720320	1112956150	3.66498e+08	5.1018e+08	4.96887e+08	310732404	4.7085e+08
P07384	Calpain-1 catalytic subunit	CAPN1	CAPN1	1.61425e+08	3.47648e+08	2.49122e+08	3.30607e+08	3.80113e+08	2.65142e+08	4.23238e+08	2.7853e+08	3.1808e+08	4.04626e+08	3.55387e+08	2.36852e+08	2.27147e+08	2.91122e+08	3.56129e+08	3.78839e+08	3.06548e+08	3.84163e+08	261596797	4.66682e+08	3.57053e+08	4.61564e+08	3.75531e+08	4.67369e+08	3.06733e+08	3.36749e+08	3.96029e+08	2.45691e+08	4.01577e+08	3.3289e+08	1.99349e+08	4.05473e+08	4.27196e+08	1.35753e+08	1.93048e+08	2.66116e+08	338507893	3.67385e+08	5.39052e+08	234337139	3.35914e+08	2.04822e+08	2.24074e+08	1.70059e+08	2.54907e+08	178059366
Q6MZZ7	Calpain-13	CAPN13	CAPN13	1.45049e+06	9.12483e+06	3.80565e+06	7.26606e+06	2.97774e+06	5.83844e+06	7.52382e+06	1.714e+07	6.34222e+06	9.99152e+06	5.79819e+06	5.05393e+06	3.45623e+06	3.46052e+06	8.98e+06	5.48096e+06	4.42163e+06	7.51384e+06	0	8501618	5.41634e+06	8.30957e+06	1.91845e+06	6.09153e+06	0	4.99883e+06	5.14819e+06	5.6313e+06	1.09276e+07	5.24622e+06	0	7.87041e+06	4.34928e+06	0	0	3.54733e+06	4.42327e+06	5.3127e+06	5.30519e+06	3.19695e+06	5.00337e+06	0	7.49127e+06	4.43159e+06	0	0
Q9Y6W3	Calpain-7	CAPN7	CAPN7	0	331394	0	441526	0	1.91147e+06	2.16714e+06	0	0	0	771228	0	9.35962e+06	0	0	1.96298e+06	733813	0	0	384110	1.14544e+06	1.68913e+06	0	686826	929564	1.53703e+06	0	561627	819182	588803	0	0	788892	0	0	0	460342	643088	2.33075e+06	0	704100	0	0	0	2.13059e+06	0
P04632	Calpain small subunit 1	CAPNS1	CAPNS1;CAPNS2	6.85331e+07	1.39593e+08	104930608	1.62301e+08	1.47851e+08	1.18735e+08	1.2523e+08	8.89234e+07	147200528	118491677	1.02135e+08	8.82736e+07	6.72161e+07	1.1412e+08	8.54825e+07	1.53802e+08	1.1327e+08	1.37458e+08	9.27977e+07	105791076	1.42212e+08	8.63202e+07	1.27669e+08	1.22536e+08	1.26614e+08	1.75958e+08	1.55319e+08	9.31834e+07	1.89396e+08	9.76205e+07	7.94169e+07	1.39796e+08	1.76989e+08	5.40801e+07	1.07036e+08	1.55193e+08	1.07301e+08	1.28004e+08	1.03706e+08	7.32689e+07	1.3181e+08	9.56442e+07	6.48829e+07	8.97079e+07	1.08233e+08	6.55602e+07
Q96L46	Calpain small subunit 2	CAPNS2	CAPNS1;CAPNS2	0	2.25045e+06	0	1.2869e+06	0	1.025e+06	1.00051e+06	835291	0	0	1.70532e+06	0	0	1.49505e+06	0	1.58714e+06	2.55361e+06	0	599111	0	1.28663e+06	0	0	2.86896e+06	1.8706e+06	0	3.61745e+06	896916	880525	0	0	0	1.81773e+06	3.82338e+06	0	0	0	0	1.52434e+06	0	0	0	0	0	0	0
Q14444	Caprin-1	CAPRIN1	CAPRIN1	2.21319e+07	7.35995e+07	7.57694e+07	1.02783e+08	7.64121e+07	1.01301e+08	1.08351e+08	9.72554e+07	7.78542e+07	9.53345e+07	8.14177e+07	6.75262e+07	9.34711e+07	9.19661e+07	1.04929e+08	1.05041e+08	4.78427e+07	5.85769e+07	5.01645e+07	8.27829e+07	9.89718e+07	1.13817e+08	1.12341e+08	6.89555e+07	6.94226e+07	81199604	1.11747e+08	8.43213e+07	9.41457e+07	9.90657e+07	6.62707e+07	8.08448e+07	6.80331e+07	3.90713e+07	7.15581e+07	7.39355e+07	8.60954e+07	6.28203e+07	1.04238e+08	7.64424e+07	8.30464e+07	4.08087e+07	4.54973e+07	4.0301e+07	5.65099e+07	7.75939e+07
A0A384NYV7	Calcyphosine, isoform CRA_a	CAPS	CAPS	4.01436e+07	2.44596e+07	3.3764e+07	8.20758e+07	7.09122e+07	5.96744e+07	3.44928e+07	3.55135e+07	5.6409e+07	5.23085e+07	2.67964e+07	3.31969e+07	1.86811e+08	5.49276e+07	8.72399e+07	4.34615e+07	8.00623e+07	3.0634e+07	1.0621e+08	1.61726e+07	7.55425e+07	2.51921e+07	3.00368e+07	1.56666e+08	8.8559e+07	4.71419e+07	8.56101e+07	1.24089e+08	1.34997e+07	9.07682e+07	5.20484e+07	2.05819e+07	8.47206e+07	3.472e+07	5.7524e+07	2.87838e+07	4.83711e+07	1.95443e+07	2.70237e+07	6.23962e+07	3.67408e+07	4.02882e+07	3.77357e+07	6.91055e+07	4.98971e+07	1.94612e+08
P52907	F-actin-capping protein subunit alpha-1	CAPZA1	CAPZA2;CAPZA1	1.02082e+07	1.60085e+07	7.21453e+06	1.59381e+07	13225290	9.48153e+06	2.82191e+07	1.72609e+07	1.1954e+07	1.59292e+07	1.58067e+07	1.32835e+07	1.49493e+07	1.66375e+07	1.99837e+07	1.7169e+07	9.38697e+06	2.17415e+07	1.3437e+07	1.94053e+07	1.77069e+07	1.61554e+07	7.11753e+06	1.01214e+07	6.75589e+06	1.04073e+07	1.40443e+07	1.43662e+07	1.78264e+07	2.07135e+07	8.28902e+06	1.64365e+07	1.53958e+07	1.15538e+07	6.95908e+06	1.63002e+07	1.342e+07	1.40955e+07	2.20314e+07	1.70488e+07	1.03025e+07	5.23644e+06	0	4.15095e+06	0	7.3112e+06
P47755	F-actin-capping protein subunit alpha-2	CAPZA2	CAPZA2;CAPZA1	4.93857e+07	1.05802e+08	9.97031e+07	1.37153e+08	1.20332e+08	124053883	1.18455e+08	9.02168e+07	119647815	1.36032e+08	147142998	1.25182e+08	7.61048e+07	130024850	1.53318e+08	1.59976e+08	9.87873e+07	1.13686e+08	1.11815e+08	1.32876e+08	1.45976e+08	1.13027e+08	5.45205e+07	7.07285e+07	127368055	1.3764e+08	1.39537e+08	1.08214e+08	1.01555e+08	9.84546e+07	5.47252e+07	1.00082e+08	1.10506e+08	27099121	8.13456e+07	7.55615e+07	1.1492e+08	8.94486e+07	1.48734e+08	9.86449e+07	8.92198e+07	6.58835e+07	5.78886e+07	7.81049e+07	7.40648e+07	6.02169e+07
Q5EG05	Caspase recruitment domain-containing protein 16	CARD16	CARD16;CASP1	0	1.69999e+06	5.06698e+06	3.99531e+06	1.33824e+07	2.23215e+06	6.5562e+06	1.05372e+06	3.28712e+06	4.03266e+06	4.00172e+06	3.28361e+06	8.50251e+06	2.71246e+06	2.5078e+06	3.99783e+06	1.98495e+06	1.25988e+06	6.28344e+06	4.8023e+06	3.37851e+06	3.75466e+06	6.75148e+06	1.43988e+06	2.58398e+06	1.02117e+07	4.11063e+06	1.31593e+07	3.12975e+06	0	852513	7.51338e+06	8.23406e+06	2.66175e+06	2.87322e+07	3.29512e+06	0	3.33926e+06	6.73302e+06	4.45541e+06	1.07541e+07	6.3342e+06	0	5.4725e+06	1.41466e+07	1.42875e+06
Q9Y2G2	Caspase recruitment domain-containing protein 8	CARD8	CARD8	0	0	0	3.75904e+06	1.44163e+06	2.83492e+06	0	854094	0	0	1.4419e+06	0	0	0	0	2.23664e+06	1.52571e+06	0	0	0	3.4863e+06	0	0	0	0	3.69899e+06	1.76145e+06	0	0	0	0	0	0	0	0	0	0	0	0	0	0	0	0	0	0	0
Q9Y2V2	Calcium-regulated heat-stable protein 1	CARHSP1	CARHSP1	4.99662e+07	5.68478e+07	8.45769e+07	4.82754e+07	6.28609e+07	8.33683e+07	4.59759e+07	4.22065e+07	2.18198e+07	3.01921e+07	2.95987e+07	3.23297e+07	1.50732e+07	5.57588e+07	5.16134e+07	4.6408e+07	6.00496e+07	1.05568e+07	2.13224e+07	3.34876e+07	4.85027e+07	4.37382e+07	3.22259e+07	3.92934e+07	3.62858e+07	5.49838e+07	9.658e+07	1.64178e+07	7.56541e+07	2.50396e+07	1.21813e+07	4.75483e+07	3.80249e+07	7.55519e+06	1.74749e+07	3.10336e+07	4.01768e+07	4.46884e+07	4.44548e+07	3.81874e+07	1.42906e+07	2.44541e+07	2.1618e+07	3.39969e+07	2.34572e+07	4.28335e+07
Q86X55	Histone-arginine methyltransferase CARM1	CARM1	CARM1	2.52733e+06	1.54693e+07	8.09104e+06	1.41801e+07	15522077	1.06812e+07	1.39499e+07	1.2112e+07	2.19619e+07	1.31283e+07	2.06151e+07	7.6947e+06	1.07879e+07	9.93824e+06	1.82723e+07	1.13662e+07	1.20074e+07	8.9419e+06	5.82085e+06	2.23968e+07	1.93871e+07	2.04494e+07	7.32129e+06	1.7711e+07	9.15118e+06	6.37487e+06	9.44931e+06	1.43579e+07	1.62063e+07	1.31748e+07	8.92257e+06	1.69541e+07	1.57352e+07	3.6718e+06	8.58672e+06	1.56919e+07	2.26805e+07	2.35406e+07	2.5276e+07	1.52745e+07	7.83998e+06	7.68264e+06	3.00505e+06	9.97723e+06	5.97982e+06	8.96817e+06
Q5VZK9	F-actin-uncapping protein LRRC16A	CARMIL1	CARMIL1;LRRC16A	2.71589e+06	9.64343e+06	2.40987e+07	1.89538e+07	1.59845e+07	2.04061e+07	1.10864e+07	1.46734e+07	1.51109e+07	1.00276e+07	2.1565e+07	5.44483e+06	1.50355e+07	8.8289e+06	8.9335e+06	9.41174e+06	6.21184e+06	1.16431e+07	1.73883e+07	28077845	3.47104e+07	1.74631e+07	2.21215e+07	5.30442e+06	2.54278e+07	1.96196e+07	3.70771e+07	8.45648e+06	9.89901e+06	1.02419e+07	1.2171e+07	1.05393e+07	9.10549e+06	1.15408e+07	1.31215e+07	7.33708e+06	1.15637e+07	1.59377e+07	1.11391e+07	7.8032e+06	1.93811e+07	1.69444e+07	4.54212e+06	2.04356e+07	1.94315e+07	1.22601e+07
B4DKY1	Cysteinyl-tRNA synthetase	CARS1	CARS;CARS1	0	0	0	0	0	0	2.00084e+06	1.56175e+06	1.23687e+06	1.66421e+06	1.94244e+06	1.70222e+06	0	0	1.66852e+06	2.41092e+06	0	1.04912e+06	0	2.17341e+06	1.11296e+06	2.52608e+06	2.66238e+06	0	1.28685e+06	0	0	0	0	0	0	0	0	0	0	0	0	0	0	0	0	0	0	0	0	0
Q9HA77	Probable cysteine--tRNA ligase, mitochondrial	CARS2	CARS2;DKFZp686G08243	0	9.55239e+06	7.84799e+06	3.15804e+06	3.12291e+06	815100	8.44405e+06	1.16759e+07	8.13841e+06	1.11969e+07	1.36135e+07	8.16269e+06	1.28355e+07	4.53164e+06	1.51254e+07	1.11283e+07	1.07438e+07	8.36266e+06	1.09436e+07	8.57068e+06	8.42731e+06	8.30941e+06	3.82055e+06	6.60546e+06	4.68737e+06	3.13453e+06	7.03138e+06	1.30588e+07	1.20132e+07	6.69912e+06	1.37698e+07	3.71105e+06	1.72468e+07	1.85443e+07	2.27071e+07	4.47312e+06	6.15039e+06	8.61999e+06	1.01283e+07	1.3178e+07	2.50976e+07	1.29422e+07	0	1.56851e+07	1.48306e+07	7.2478e+06
A0A024R1X0	Protein CASC3	CASC3	CASC3	0	0	585911	0	0	1.35177e+06	1.57534e+06	1.19438e+06	0	0	1.7881e+06	0	0	1.67429e+06	2.16134e+06	0	1.08049e+06	763031	1.42766e+06	1.39183e+06	0	0	0	0	0	0	0	592155	0	0	0	0	0	0	0	0	0	493046	0	0	0	0	0	919722	0	0
O14936	Peripheral plasma membrane protein CASK	CASK	CASK	0	5.04582e+06	0	0	0	0	0	2.55681e+07	0	0	0	0	0	0	0	0	0	0	0	7830121	3.03265e+06	4.66437e+06	2.05944e+06	0	2.3816e+06	0	0	0	9.84811e+06	0	0	5.79003e+06	6.58683e+06	0	0	0	8.14962e+06	1.64338e+07	1.59661e+07	0	0	0	0	0	0	0
A0A2U3TZN6	Peripheral plasma membrane protein CASK	CASK	CASK	0	2.31718e+06	0	0	0	0	4.22963e+06	1.04852e+06	0	0	4.14634e+06	0	0	0	0	5.20785e+06	5.35532e+06	0	0	5.29553e+06	0	3.42004e+06	4.78201e+06	0	0	0	0	0	6.11728e+06	0	0	0	0	0	0	0	0	5.10241e+06	0	0	0	0	0	0	0	0
Q8WXE0	Caskin-2	CASKIN2	CASKIN2;CASKIN1	0	9.1276e+06	1.67425e+06	1.45631e+06	0	1.07465e+07	2.57154e+06	390475	1.95134e+06	2.89216e+06	0	4.63745e+06	0	0	3.30076e+06	0	4.61722e+06	5.6978e+06	0	4.23695e+06	7.16634e+06	4.11213e+06	5.01985e+06	2.70248e+06	9.04218e+06	1.23498e+06	2.7025e+06	4.26693e+06	3.87058e+06	2.59442e+06	2.09551e+06	3.36136e+06	5.62706e+06	6.32769e+06	3.25411e+06	3.43429e+06	4.59349e+06	4.90659e+06	9.35823e+06	3.57642e+06	7.17245e+06	2.03798e+06	3.83575e+06	6.3318e+06	8.18153e+06	3.30099e+06
P29466	Caspase-1	CASP1	CARD16;CASP1	1.12899e+08	3.46509e+08	1.67385e+08	2.2152e+08	2.61339e+08	2.08424e+08	3.43024e+08	2.35452e+08	2.31518e+08	3.00254e+08	369778595	2.29508e+08	2.13619e+08	2.14107e+08	287123122	3.11754e+08	1.90491e+08	2.13868e+08	1.47763e+08	5.50429e+08	3.67962e+08	5.83904e+08	4.5879e+08	3.75754e+08	1.57492e+08	1.9087e+08	2.23667e+08	3.08851e+08	4.26272e+08	2.86082e+08	1.27728e+08	6.34179e+08	4.11455e+08	8.61913e+07	1.84543e+08	2.95156e+08	3.1847e+08	4.22078e+08	3.86991e+08	2.81954e+08	3.10029e+08	1.34096e+08	1.49867e+08	1.24737e+08	1.32791e+08	1.50571e+08
A0A0S2Z3Z5	Caspase 10 apoptosis-related cysteine peptidase isoform 1 (Fragment)	CASP10	CASP10	1.10543e+07	8.46047e+06	7.06999e+06	6.67283e+06	5.70723e+06	5.65705e+06	8.25332e+06	5.7959e+06	5.78581e+06	7.47701e+06	7.19387e+06	1.06161e+07	4.99022e+06	7.48277e+06	8.80478e+06	7.04977e+06	6.95815e+06	5.41936e+06	7.55881e+06	8.17941e+06	8.72214e+06	1.07022e+07	1.1167e+07	9.43133e+06	1.08957e+07	6.09588e+06	6.984e+06	8.05882e+06	8.07285e+06	8.55124e+06	6.83846e+06	1.61042e+07	4.2672e+06	1.23628e+07	4.08364e+06	7.47553e+06	6.76621e+06	7.19081e+06	9.36706e+06	5.92734e+06	8.67394e+06	1.50423e+07	1.05236e+07	6.54687e+06	1.10729e+07	1.11827e+07
B2CIS9	Caspase 14, apoptosis-related cysteine peptidase	CASP14	CASP14	0	6.32306e+06	3.99825e+06	5.89243e+06	1.11926e+07	1.8932e+06	2.90149e+06	3.61483e+06	3.74694e+06	6.71108e+06	8.35463e+06	2.39073e+06	2.12987e+07	6.15816e+06	2.688e+06	2.47993e+06	2.85467e+06	5.50125e+06	3.55432e+06	6.22361e+06	3.35549e+06	4.61171e+06	3.91316e+06	4.18602e+06	6.68881e+06	5.20868e+06	5.6421e+06	6.80824e+06	4.99074e+06	5.28638e+06	1.18309e+07	700425	6.91414e+06	5.58261e+06	1.44193e+07	2.79917e+06	6.65581e+06	7.80392e+06	6.27944e+06	1.80518e+06	1.05546e+07	0	3.16423e+06	1.34491e+06	2.02541e+06	1.69545e+07
P42574	Caspase-3	CASP3	CASP6;CASP3;DKFZp686N1815	1.9442e+06	1.60287e+07	1.44402e+06	3.99842e+06	4.49022e+06	2.02781e+06	7.5823e+06	1.52459e+06	4.93351e+06	8.88926e+06	9.15192e+06	1.16953e+07	7.51793e+06	2.91145e+06	8.18063e+06	9.83284e+06	4.8762e+06	1.16342e+07	2.2542e+06	6.39143e+06	6.63507e+06	1.36234e+07	9.73825e+06	2.38028e+07	3.16736e+06	5.38991e+06	6.8582e+06	4.61821e+06	2.10869e+07	5.33079e+06	3.84991e+06	2.46846e+07	6.18178e+06	2.53612e+06	3.81821e+06	1.49798e+07	6.09011e+06	7.13349e+06	1.71201e+07	7.36762e+06	7.98393e+06	2.76666e+06	7.96425e+06	856464	4.48447e+06	1.71984e+06
P49662	Caspase-4	CASP4	CASP4;CASP5	0	0	0	1.12044e+06	0	978534	3.57345e+06	0	1.56435e+06	2.19839e+06	1.57043e+06	919521	1.97177e+06	1.67526e+06	3.23116e+06	3.52086e+06	1.0396e+06	0	2.835e+06	5.33281e+06	3.24849e+06	6.40133e+06	6.37612e+06	8.44339e+06	0	1.03627e+06	1.10863e+06	1.09024e+06	1.03765e+06	2.17622e+06	3.44855e+06	4.22445e+06	1.40103e+06	0	4.1791e+06	2.64167e+06	2.55976e+06	7.80424e+06	3.67158e+06	2.06087e+06	1.22803e+06	0	3.63057e+06	0	0	845449
P55212	Caspase-6	CASP6	CASP6;CASP3	6.02768e+06	7.35481e+06	3.9735e+06	8.4346e+06	9.63349e+06	4.81197e+06	7.40613e+06	6.17384e+06	4.8336e+06	1.09608e+07	9.64167e+06	5.78267e+06	3.25263e+06	3.16689e+06	1.10907e+07	9.06897e+06	1.08073e+07	1.35422e+07	5.7001e+06	1.4791e+07	9.38209e+06	1.10824e+07	9.87785e+06	7.69239e+06	4.93073e+06	6.36324e+06	6.50271e+06	5.95003e+06	2.14594e+07	1.12283e+07	4.1037e+06	9.12001e+06	7.81695e+06	2.99687e+06	6.38426e+06	1.02969e+07	7.96072e+06	9.4876e+06	1.15565e+07	1.08038e+07	5.08231e+06	3.02619e+06	4.09317e+06	4.66663e+06	4.03937e+06	4.36764e+06
P55210	Caspase-7	CASP7	CASP7	1.54975e+06	2.35961e+06	618895	2.31851e+06	1.33903e+06	742806	1.75969e+06	530262	3.47416e+06	2.90587e+06	1.69249e+06	678606	722746	2.3879e+06	3.5531e+06	1.6484e+06	4.6021e+06	444960	2.89226e+06	2.39495e+06	3.90787e+06	4.35853e+06	2.31379e+06	2.01693e+06	1.72248e+06	677840	2.65424e+06	1.60849e+06	3.76719e+06	2.87431e+06	0	4.69217e+06	2.84328e+06	0	687220	1.21165e+06	1.89738e+06	3.95454e+06	9.64045e+06	2.28468e+06	2.28681e+06	0	0	0	0	749317
Q14790	Caspase-8	CASP8	CASP8;Casp8;hCG_16983	3.48825e+06	9.51673e+06	0	1.86084e+06	2.15568e+06	2.90908e+06	5.69634e+06	1.40692e+06	6.13342e+06	1.06774e+07	9.64399e+06	9.58058e+06	0	8.10524e+06	6.78362e+06	8.47174e+06	2.6219e+06	3.72389e+06	2.25447e+06	2.50431e+06	5.01595e+06	6.3729e+06	9.51352e+06	2.14212e+06	945147	1.93715e+06	2.0072e+06	8.53832e+06	9.58891e+06	4.88316e+06	3.51295e+06	1.77672e+07	5.01334e+06	0	6.1336e+06	5.10456e+06	1.03805e+07	1.01614e+07	1.42425e+07	5.48791e+06	7.10454e+06	4.02954e+06	3.48419e+06	1.42457e+06	5.44965e+06	5.55636e+06
P31415	Calsequestrin-1	CASQ1	CASQ1	0	0	1.51026e+06	2.96477e+06	3.05803e+06	2.37006e+06	2.92086e+06	2.18901e+06	1.80953e+06	2.78658e+06	3.53364e+06	1.80744e+06	0	2.77189e+06	1.71724e+06	2.7519e+06	1.52214e+06	3.01987e+06	2.19691e+06	5.27413e+06	4.7318e+06	0	2.21881e+06	3.30665e+06	0	3.4702e+06	3.73643e+06	1.47962e+06	5.44297e+06	1.89864e+06	2.15708e+06	0	0	0	0	0	0	1.9831e+06	0	1.95146e+06	0	0	1.79894e+06	754177	0	0
P41180	Extracellular calcium-sensing receptor	CASR	CASR	0	0	0	0	0	0	0	0	0	477012	562754	402335	537985	409592	738598	419206	484196	369172	519942	0	0	0	0	0	0	0	0	666451	0	0	0	0	0	0	0	430462	973417	468256	888781	1.29305e+06	474060	0	877243	0	0	0
A0A024RAN2	Calpain inhibitor	CAST	CAST	3.70255e+08	7.51899e+07	186427730	5.33219e+07	6.74934e+07	1.70869e+08	5.0323e+07	1.63048e+08	9.71124e+07	4.32163e+07	4.4096e+07	8.55072e+07	9.98984e+07	8.64246e+07	8.51524e+07	6.93916e+07	1.45464e+08	1.24064e+08	1.11482e+08	3.78946e+07	7.50484e+07	3.13591e+07	6.51857e+07	2.87168e+07	1.36672e+08	1.23247e+08	8.22901e+07	7.00242e+07	3.76404e+07	7.69803e+07	1.44269e+08	9.51799e+07	4.41123e+07	2.91397e+08	1.98059e+08	1.00664e+08	2.93311e+07	1.50982e+07	4.88579e+07	1.11503e+08	1.04991e+08	1.94635e+08	8.20342e+07	1.85579e+08	143274541	8.86461e+07
D6RBR1	Calpastatin (Fragment)	CAST	CAST	0	0	1.68399e+06	1.68435e+06	0	1.36474e+06	0	0	0	2.40231e+06	0	1.66153e+06	0	0	0	2.72942e+06	1.89882e+06	0	0	0	1.73804e+06	0	0	0	0	1.24936e+06	0	1.42739e+06	0	0	0	0	0	0	0	0	0	0	0	0	0	0	0	0	0	2.3912e+06
E7EQ12	Calpain inhibitor	CAST	CAST	3.91264e+06	0	9.14431e+06	0	0	0	560310	830892	2.45484e+06	0	0	740819	0	0	0	0	2.11182e+06	0	0	0	1.25697e+06	1.55169e+06	0	0	0	0	5.46507e+06	0	1.8076e+06	2.06708e+06	0	0	4.37501e+06	0	0	0	0	0	0	3.79589e+06	2.73617e+06	1.16541e+06	0	0	0	0
P04040	Catalase	CAT	cat;CAT	1914605787	4.37336e+08	1409528845	1038857506	8.19345e+08	1102928129	5.62457e+08	1064873355	9.47516e+08	3.98434e+08	4.53885e+08	5.91398e+08	581316912	5.06252e+08	6.66357e+08	6.34546e+08	890402639	8.82165e+08	1284493962	4.56643e+08	5.71468e+08	4.41559e+08	4.08196e+08	5.74571e+08	1345264888	9.28635e+08	830332997	7.38325e+08	5.5698e+08	6.04001e+08	1016526935	9.73118e+08	3.97677e+08	1007496725	1161317028	7.40128e+08	5.16063e+08	2.44813e+08	4.294e+08	5.39592e+08	5.27231e+08	1184487417	7.50382e+08	8.89186e+08	8.10758e+08	1128732424
Q2TNI1	Caveolin	CAV1	CAV3;CAV1	1.46942e+08	4.719e+07	5.01717e+08	2.09418e+08	2.68134e+08	3.05104e+08	189928400	2.17366e+08	1.02893e+08	5.3104e+07	6.79157e+07	5.23713e+07	1.40823e+08	1.96231e+08	1.21297e+08	116566666	1.55539e+08	135583278	2.63152e+08	1.12309e+08	2.36909e+08	1.32958e+08	6.94627e+07	5.08528e+07	4.86301e+08	4.17002e+08	6.12679e+08	8.69498e+07	4.40943e+07	9.97855e+07	1.17214e+08	5.89509e+07	6.53277e+07	2.13791e+08	125783544	4.8812e+07	5.315e+07	5.94608e+07	4.04018e+07	6.48675e+07	6.71619e+07	2.16411e+08	9.87852e+07	3.13791e+08	1.61826e+08	1.48992e+08
P51636	Caveolin-2	CAV2	CAV2	1.01159e+07	2.77636e+07	3.25839e+07	3.44109e+07	3.55016e+07	2.74238e+07	1.81637e+07	1.62711e+07	5.73218e+07	3.14349e+07	3.75531e+07	2.55392e+07	2.03348e+07	3.61361e+07	3.9884e+07	1.71721e+07	2.95082e+07	1.26885e+07	4.87414e+07	4.58565e+07	4.70985e+07	3.06969e+07	1.66537e+07	2.81684e+07	6.66712e+07	3.94406e+07	5.50759e+07	3.25268e+07	2.23085e+07	2.85587e+07	2.02558e+07	3.90774e+07	2.70657e+07	1.75507e+07	2.41433e+07	3.00941e+07	3.77693e+07	3.56095e+07	3.2904e+07	2.89258e+07	3.33228e+07	1.00855e+07	1.59894e+07	1.65352e+07	1.95232e+07	1.91314e+07
O95810	Caveolae-associated protein 2	CAVIN2	CAVIN2	3.95306e+08	1.80828e+08	1001487620	6.09632e+08	7.60182e+08	7.51466e+08	4.86898e+08	4.4336e+08	2.6269e+08	2.80696e+08	2.57561e+08	1.42517e+08	3.92675e+08	3.65586e+08	2.91467e+08	3.2599e+08	303610312	2.87363e+08	6.73302e+08	4.00547e+08	5.35092e+08	3.44353e+08	1.77474e+08	1.85087e+08	1292862428	8.19218e+08	1220558052	2.83716e+08	3.57394e+08	2.24379e+08	2.45268e+08	1.98269e+08	2.3127e+08	3.70186e+08	3.19766e+08	1.48794e+08	2.15073e+08	183628297	3.38781e+08	280804227	2.17573e+08	5.32892e+08	202925730	6.0231e+08	4.62723e+08	3.31725e+08
[truncated: 8,386 more rows]
[truncated: 76 more columns]
