# Supplementary material for: Proteogenomic analysis of air-pollution-associated lung cancer reveals prevention and therapeutic opportunities
Source: eLife. 2024 Oct 21;13:RP95453. doi: 10.7554/eLife.95453 (PMC11493407; doi:10.7554/eLife.95453)
Supplement: Supplementary file 6. [file elife-95453-supp6.xlsx]

## Sheet: Description
Table S6. Quantitative phosphoproteomic data at phosphosite level normalized by column (patient) median.

## Sheet: S6
Protein	Description	Gene Name	Gene groups	Modified sequence	Amino acid_Position	Modifications	XWLC_0055__tumor_phospho_s	XWLC_0059__tumor_phospho_s	XWLC_0061__tumor_phospho_s	XWLC_0063__tumor_phospho_s	XWLC_0073__tumor_phospho_s	XWLC_0077__tumor_phospho_s	XWLC_0078__tumor_phospho_s	XWLC_0082__tumor_phospho_s	XWLC_0083__tumor_phospho_s	XWLC_0084__tumor_phospho_s	XWLC_0085__tumor_phospho_s	XWLC_0101__tumor_phospho_s	XWLC_0093__tumor_phospho_s	XWLC_0110__tumor_phospho_s	XWLC_0057__tumor_phospho_s	XWLC_0003__tumor_phospho_s	XWLC_0004__tumor_phospho_s	XWLC_0006__tumor_phospho_s	XWLC_0008__tumor_phospho_s	XWLC_0010__tumor_phospho_s	XWLC_0011__tumor_phospho_s	XWLC_0012__tumor_phospho_s	XWLC_0015__tumor_phospho_s	XWLC_0016__tumor_phospho_s	XWLC_0017__tumor_phospho_s	XWLC_0021__tumor_phospho_s	XWLC_0023__tumor_phospho_s	XWLC_0024__tumor_phospho_s	XWLC_0026__tumor_phospho_s	XWLC_0027__tumor_phospho_s	XWLC_0036__tumor_phospho_s	XWLC_0037__tumor_phospho_s	XWLC_0038__tumor_phospho_s	XWLC_0040__tumor_phospho_s	XWLC_0041__tumor_phospho_s	XWLC_0043__tumor_phospho_s	XWLC_0044__tumor_phospho_s	XWLC_0046__tumor_phospho_s	XWLC_0047__tumor_phospho_s	XWLC_0129__tumor_phospho_s	XWLC_0107__tumor_phospho_s	XWLC_0130__tumor_phospho_s	XWLC_0133__tumor_phospho_s
Q8IYH5	ZZ-type zinc finger-containing protein 3	ZZZ3	ZZZ3	RQTEPVSPVLKR	S113	1xPhospho [S7]	0	920554	2.32597e+06	1.62346e+06	2.58752e+06	3.96484e+06	2.99641e+06	1.68709e+06	2.27984e+06	2.49649e+06	2.24947e+06	4.76808e+06	3.30314e+06	3.75175e+06	8.35063e+06	1.54606e+06	2.78084e+06	2.54725e+06	3.56635e+06	3.41083e+06	2.6195e+06	0	2.17398e+06	1.85548e+06	5.82483e+06	2.13308e+06	5.74956e+06	5.71144e+06	4.45796e+06	3.30041e+06	2.23523e+06	1.163e+06	0	0	4.59543e+06	2.10712e+06	2.71448e+06	3.20947e+06	5.47601e+06	5.7331e+06	3.23368e+06	0	2.21131e+06
Q8IYH5	ZZ-type zinc finger-containing protein 3	ZZZ3	ZZZ3	GLSSSEKDNIER	S89	1xPhospho [S3]	1.22578e+07	1.95612e+07	2.46591e+07	2.03843e+07	2.5898e+07	2.50258e+07	2.0346e+07	1.50492e+07	7.58849e+06	2.77403e+07	3.12298e+07	1.62261e+07	2.96619e+07	3.00977e+07	1.61351e+07	2.89862e+07	1.38038e+07	1.29026e+07	1.40651e+07	1.69187e+07	3.2789e+07	2.73158e+06	2.342e+07	1.64241e+07	2.46983e+07	8.53961e+06	2.49923e+07	1.38497e+07	2.13544e+07	1.92279e+07	1.14255e+07	7.72837e+06	2.26024e+07	1.15237e+07	1.47364e+07	1.62911e+07	1.53209e+07	1.73395e+07	1.97035e+07	3.20773e+07	1.75118e+07	3.7639e+07	2.29012e+07
Q8IYH5	ZZ-type zinc finger-containing protein 3	ZZZ3	ZZZ3	QTEPVSPVLKR	S113	1xPhospho [S6]	3.08902e+06	6.92444e+06	7.21391e+06	8.76084e+06	6.62617e+06	9.5882e+06	7.15384e+06	7.54862e+06	6.27007e+06	1.36001e+07	9.3402e+06	6.52733e+06	7.93896e+06	8.34515e+06	9.90736e+06	7.8824e+06	6.82466e+06	6.19173e+06	9.35593e+06	7.08115e+06	6.14682e+06	0	7.01179e+06	2.87147e+06	8.34958e+06	2.94996e+06	9.92462e+06	1.02408e+07	6.90144e+06	1.0495e+07	1.19834e+07	4.32123e+06	4.23191e+06	1.42838e+06	2.23111e+06	2.35953e+06	7.07964e+06	8.86553e+06	6.2409e+06	9.20557e+06	9.08672e+06	1.06602e+07	7.44119e+06
Q8IYH5	ZZ-type zinc finger-containing protein 3	ZZZ3	ZZZ3	RQTEPVSPVLK	S113	1xPhospho [S7]	3.08902e+06	3.22055e+06	4.2476e+06	4.34183e+06	3.8821e+06	5.58172e+06	4.30755e+06	4.50915e+06	3.80315e+06	7.55466e+06	5.57633e+06	3.60841e+06	4.48287e+06	4.0028e+06	3.87918e+06	4.46833e+06	3.96279e+06	3.82584e+06	5.03423e+06	3.65033e+06	3.46824e+06	0	4.2703e+06	2.87147e+06	4.09226e+06	2.94996e+06	5.85396e+06	6.4208e+06	3.81944e+06	5.45986e+06	6.44288e+06	2.7216e+06	4.23191e+06	1.42838e+06	2.23111e+06	2.35953e+06	4.13616e+06	4.4481e+06	2.6422e+06	5.93404e+06	6.43514e+06	6.08407e+06	3.94664e+06
Q8IYH5	ZZ-type zinc finger-containing protein 3	ZZZ3	ZZZ3	QTEPVSPVLK	S113	1xPhospho [S6]	0	1.50194e+06	4.0025e+06	976518	1.46191e+06	2.0908e+06	1.34679e+06	1.60131e+06	0	0	1.64677e+06	1.43886e+06	1.7311e+06	0	1.5647e+06	2.1096e+06	0	2.24377e+06	2.85151e+06	1.28326e+06	2.09558e+06	0	1.74839e+06	0	1.6212e+06	0	2.45572e+06	1.92239e+06	1.24605e+06	2.22865e+06	5.38365e+06	0	0	4.25778e+06	6.45477e+06	1.15511e+07	1.42508e+06	2.15639e+06	0	0	0	0	1.0746e+06
Q8IYH5	ZZ-type zinc finger-containing protein 3	ZZZ3	ZZZ3	VGLPARPKSPLDPK	S606	1xPhospho [S9]	0	0	6.04429e+06	0	2.93382e+06	2.79916e+06	4.21961e+06	2.30394e+06	0	0	1.74549e+06	0	1.97938e+06	4.73574e+06	2.35274e+06	3.08906e+06	0	640451	0	1.47526e+06	8.44314e+06	0	1.69371e+06	6.19277e+06	1.56488e+06	0	4.86767e+06	9.0773e+06	1.06824e+07	2.64195e+06	1.47655e+06	1.86963e+06	0	3.18672e+06	2.27989e+06	4.20349e+06	1.09835e+06	6.00252e+06	9.06034e+06	0	0	0	1.11576e+06
O43149	Zinc finger ZZ-type and EF-hand domain-containing protein 1	ZZEF1	ZZEF1	LPSSSGLPAADVSPATAEEPLSPSTPTR	S1518	2xPhospho [S22; S24]	130125	100654	1.14885e+06	816480	86720.9	103181	2.83997e+06	4.31646e+06	173533	0	176506	1.31563e+06	401546	0	3.10479e+06	201891	461919	65732.7	381774	105057	0	0	0	53034.3	594830	384957	203715	2.37767e+06	3.77481e+06	0	498642	147412	0	0	6.03685e+06	3.26473e+06	5.46009e+06	227035	1.62114e+06	2.39387e+06	0	0	4.43508e+06
O43149	Zinc finger ZZ-type and EF-hand domain-containing protein 1	ZZEF1	ZZEF1	LPSSSGLPAADVSPATAEEPLSPSTPTR	S1520	2xPhospho [S22; S24]	130125	100654	1.14885e+06	816480	86720.9	103181	2.83997e+06	4.31646e+06	173533	0	176506	1.31563e+06	401546	0	3.10479e+06	201891	461919	65732.7	381774	105057	0	0	0	53034.3	594830	384957	203715	2.37767e+06	3.77481e+06	0	498642	147412	0	0	6.03685e+06	3.26473e+06	5.46009e+06	227035	1.62114e+06	2.39387e+06	0	0	4.43508e+06
O43149	Zinc finger ZZ-type and EF-hand domain-containing protein 1	ZZEF1	ZZEF1	LPSSSGLPAADVSPATAEEPLSPSTPTR	S1518	1xPhospho [S22]	678320	1.0522e+06	4.42865e+06	1.39217e+06	0	5.97261e+06	1.10371e+07	6.39809e+06	815481	0	0	178904	0	0	4.00045e+06	537078	169876	83009.1	0	173100	363728	164016	74619.3	0	139024	75575.9	280348	8.58454e+06	1.43743e+07	84657.5	0	261795	0	622750	3.59199e+06	4.79752e+06	3.32036e+06	1.63336e+06	1.71512e+07	0	0	0	800225
O43149	Zinc finger ZZ-type and EF-hand domain-containing protein 1	ZZEF1	ZZEF1	AVTPSPEQVFAECSQK	T2074	1xCarbamidomethyl [C13]; 1xPhospho [T3]	0	0	0	0	0	1.79837e+06	0	0	0	0	0	0	0	0	0	0	0	0	0	0	2.31316e+06	770746	0	0	2.23486e+06	0	0	0	0	0	0	0	0	0	0	0	0	0	0	0	0	0	0
O43149	Zinc finger ZZ-type and EF-hand domain-containing protein 1	ZZEF1	ZZEF1	HQVCPELELEASWPTHPHR	S1267	1xCarbamidomethyl [C4]; 1xPhospho [S12]	4.07296e+06	0	2.88451e+06	0	6.75904e+06	3.82815e+06	8.43976e+06	3.33454e+06	4.51367e+06	0	4.01695e+06	2.60785e+07	0	1.3391e+06	8.82054e+06	8.30098e+06	7.89733e+06	3.37983e+06	8.04723e+06	2.16663e+06	5.19801e+06	0	3.06731e+06	0	1.29754e+07	1.35281e+06	8.54952e+06	0	1.6692e+07	9.2664e+06	0	0	0	0	8.16873e+06	0	0	1.14972e+07	2.39736e+07	4.71361e+06	2.04318e+06	0	0
H0Y2Y8	Zyxin (Fragment)	ZYX	ZYX	GPPASSPAPAPKFSPVTPK	S227	3xPhospho [S6; S14; T/S]	6.34482e+06	7.15648e+06	5.34036e+06	6.74543e+06	4.95026e+06	4.4748e+06	8.57916e+06	2.1646e+06	1.3479e+07	0	1.17126e+07	1.43581e+07	0	2.09903e+06	4.21297e+06	4.45844e+06	1.06164e+07	6.8308e+06	1.30541e+07	0	465717	1.00207e+07	711162	0	3.4016e+06	1.50301e+06	7.10586e+06	0	1.23253e+06	1.89332e+07	1.02621e+07	764421	2.45559e+06	0	862703	7.41082e+06	3.01432e+06	9.56741e+06	9.60504e+06	9.11402e+06	0	0	5.94749e+06
H0Y2Y8	Zyxin (Fragment)	ZYX	ZYX	GPPASSPAPAPKFSPVTPK	S235	3xPhospho [S6; S14; T/S]	6.34482e+06	7.15648e+06	5.34036e+06	6.74543e+06	4.95026e+06	4.4748e+06	8.57916e+06	2.1646e+06	1.3479e+07	0	1.17126e+07	1.43581e+07	0	2.09903e+06	4.21297e+06	4.45844e+06	1.06164e+07	6.8308e+06	1.30541e+07	0	465717	1.00207e+07	711162	0	3.4016e+06	1.50301e+06	7.10586e+06	0	1.23253e+06	1.89332e+07	1.02621e+07	764421	2.45559e+06	0	862703	7.41082e+06	3.01432e+06	9.56741e+06	9.60504e+06	9.11402e+06	0	0	5.94749e+06
H0Y2Y8	Zyxin (Fragment)	ZYX	ZYX	GPPASSPAPAPKFSPVTPK	S235	1xPhospho [S14]	0	0	640310	0	1.15096e+06	9.47835e+06	3.28564e+06	0	1.37964e+06	0	1.60717e+06	0	0	867504	7.16574e+06	3.70089e+06	0	0	3.89858e+06	814754	2.31082e+06	0	2.45325e+06	0	1.82382e+06	0	2.16272e+06	0	0	5.82971e+06	0	1.11421e+06	0	4.75426e+06	0	1.13613e+06	0	8.347e+06	3.52168e+07	0	0	1.29377e+06	0
H0Y2Y8	Zyxin (Fragment)	ZYX	ZYX	QHPVPPPAQNQNQVRSPGAPGPLTLK	S312	1xPhospho [S16]	0	1.78844e+06	0	0	0	5.06146e+06	2.15689e+06	0	0	2.78416e+06	1.16251e+06	0	0	0	9.67712e+06	0	0	0	0	0	0	2.57959e+06	0	0	0	0	0	0	0	1.73279e+06	0	0	0	0	0	1.6135e+06	0	3.77364e+06	3.20898e+07	0	0	0	0
H0Y2Y8	Zyxin (Fragment)	ZYX	ZYX	VNPFRPGDSEPPPAPGAQR	S43	1xPhospho [S9]	1.44343e+06	0	2.12916e+06	0	0	0	939322	0	1.69315e+06	0	1.52555e+06	4.86892e+06	0	0	1.18195e+06	1.2347e+06	0	0	845935	0	1.52264e+06	0	0	0	0	0	830732	0	1.4924e+06	1.47355e+06	0	0	0	0	2.39311e+06	4.63428e+06	663166	4.41518e+06	4.56492e+06	0	1.79377e+06	0	827160
Q15942	Zyxin	ZYX	ZYX	VSSIDLEIDSLSSLLDDMTK	S143	1xPhospho [S3]; 1xOxidation [M18]	0	0	0	0	398082	0	0	221404	0	0	0	0	0	0	212767	0	0	0	183943	0	0	0	109286	0	0	0	0	0	0	209897	90805.6	0	0	0	0	246015	0	698662	190402	0	0	0	0
H0Y2Y8	Zyxin (Fragment)	ZYX	ZYX	AAPRPSPAISVSVSAPAFYAPQKK	S6	1xAcetyl [N-Term]; 1xPhospho [S6]	0	0	0	0	75232.1	0	2.75682e+06	0	0	0	0	0	0	0	0	0	0	0	0	0	353278	0	0	0	0	0	149527	0	0	0	0	0	0	0	0	972210	0	0	0	0	0	0	0
H0Y2Y8	Zyxin (Fragment)	ZYX	ZYX	CSVCSEPIMPEPGRDETVR	S473	2xCarbamidomethyl [C1; C4]; 1xPhospho [S2]; 1xOxidation [M9]	3.05848e+06	0	0	5.33117e+06	4.62563e+06	9.30784e+06	0	3.18829e+06	2.48201e+06	2.63421e+06	0	0	3.84266e+06	3.96644e+06	4.29944e+06	5.94648e+06	3.32042e+06	2.7176e+06	3.59927e+06	0	1.59526e+06	0	1.86072e+06	3.26056e+06	0	1.56202e+06	3.77843e+06	0	0	0	1.8385e+06	2.50149e+06	0	2.64338e+06	0	9.69709e+07	0	2.51328e+06	2.38729e+06	3.51138e+06	4.21538e+06	0	6.69609e+06
C9JJK5	Zyxin (Fragment)	ZYX	ZYX	VRSPGAPGPLTLK	S34	1xPhospho [S3]	0	0	0	0	0	0	0	0	0	0	0	0	0	0	0	0	0	0	0	0	0	0	0	0	0	0	0	0	0	0	0	0	0	0	690869	0	0	0	0	9.09211e+06	1.57305e+07	8.12705e+06	1.7375e+06
H0Y2Y8	Zyxin (Fragment)	ZYX	ZYX	LGHPEALSAGTGSPQPPSFTYAQQR	S271	2xPhospho [S8; S13]	135508	0	2.27811e+06	2.66862e+06	7.21528e+06	0	0	0	0	332115	0	1.9214e+06	0	0	0	0	0	0	158484	0	0	0	0	0	0	2.32736e+06	1.70788e+06	1.11151e+06	1.21864e+06	0	0	0	0	1.5186e+07	1.31068e+06	0	0	1.25953e+06	927644	0	0	0	0
H0Y2Y8	Zyxin (Fragment)	ZYX	ZYX	LGHPEALSAGTGSPQPPSFTYAQQR	S276	2xPhospho [S8; S13]	135508	0	2.27811e+06	2.66862e+06	7.21528e+06	0	0	0	0	332115	0	1.9214e+06	0	0	0	0	0	0	158484	0	0	0	0	0	0	2.32736e+06	1.70788e+06	1.11151e+06	1.21864e+06	0	0	0	0	1.5186e+07	1.31068e+06	0	0	1.25953e+06	927644	0	0	0	0
H0Y2Y8	Zyxin (Fragment)	ZYX	ZYX	FSPVTPK	S235	2xPhospho [S2; T5]	1.52111e+07	3.75245e+06	7.55269e+06	6.05942e+06	6.92971e+06	1.80525e+06	1.62976e+07	8.7881e+06	2.09773e+07	1.3766e+07	2.28588e+07	2.29363e+07	1.33128e+06	1.00964e+07	1.75457e+06	1.2135e+07	2.25714e+07	1.33618e+07	1.62564e+07	4.34466e+06	1.2204e+07	516372	1.01115e+06	4.61762e+06	4.71441e+06	1.8972e+07	8.76143e+06	402464	5.62752e+06	1.33503e+07	5.16577e+06	3.53768e+06	4.61041e+06	1.7804e+06	1.50058e+06	9.77144e+06	1.20043e+06	1.75312e+07	5.25457e+06	1.94876e+07	2.5927e+06	7.04561e+06	1.07065e+07
H0Y2Y8	Zyxin (Fragment)	ZYX	ZYX	FSPVTPK	T238	2xPhospho [S2; T5]	1.52111e+07	3.75245e+06	7.55269e+06	6.05942e+06	6.92971e+06	1.80525e+06	1.62976e+07	8.7881e+06	2.09773e+07	1.3766e+07	2.28588e+07	2.29363e+07	1.33128e+06	1.00964e+07	1.75457e+06	1.2135e+07	2.25714e+07	1.33618e+07	1.62564e+07	4.34466e+06	1.2204e+07	516372	1.01115e+06	4.61762e+06	4.71441e+06	1.8972e+07	8.76143e+06	402464	5.62752e+06	1.33503e+07	5.16577e+06	3.53768e+06	4.61041e+06	1.7804e+06	1.50058e+06	9.77144e+06	1.20043e+06	1.75312e+07	5.25457e+06	1.94876e+07	2.5927e+06	7.04561e+06	1.07065e+07
P98168	Zinc finger X-linked protein ZXDA	ZXDA	ZXDB;ZXDA	GPDSPAGQVPTR	S34	1xPhospho [S4]	6.84429e+06	2.10323e+06	699124	0	0	2.14182e+06	0	0	0	0	0	0	0	0	0	0	0	0	0	0	2.04668e+06	1.9237e+06	0	0	900998	1.76296e+06	0	3.34325e+06	0	0	0	0	0	3.15778e+06	2.40545e+06	3.05313e+06	0	0	0	0	0	4.72159e+06	0
O43264	Centromere/kinetochore protein zw10 homolog	ZW10	ZW10	INVPELPTPDEDNKLEVQK	T438	1xPhospho [T8]	0	0	0	291930	0	1.11185e+06	0	610214	0	0	809163	0	0	0	0	0	0	0	0	0	0	0	0	0	0	0	0	1.42246e+06	0	0	0	0	0	0	0	483307	0	0	0	0	0	0	0
S4R410	Zinc finger SWIM domain-containing protein 8	ZSWIM8	ZSWIM8	GWGSPGRPK	S1135	1xPhospho [S4]	6.85617e+06	1.4766e+06	6.75734e+06	2.01706e+06	4.99264e+06	3.31764e+06	3.66595e+06	8.3557e+06	2.65839e+06	6.07524e+06	7.24995e+06	6.06385e+06	7.90664e+06	1.10526e+07	7.91414e+06	2.37987e+06	3.81701e+06	4.36989e+06	3.04811e+06	2.04507e+07	7.65649e+06	2.18019e+06	8.44031e+06	9.14873e+06	9.66227e+06	2.66363e+07	1.97524e+07	1.60104e+07	1.46695e+07	5.03158e+06	1.06279e+07	1.80349e+07	0	2.55412e+07	7.56522e+06	1.17527e+07	1.18378e+07	1.05253e+07	4.91608e+06	1.41408e+07	3.16461e+07	7.0743e+06	1.89768e+07
S4R410	Zinc finger SWIM domain-containing protein 8	ZSWIM8	ZSWIM8	NVPESSPHSPCEGLPSEAALTPRPEGK	S1104	1xCarbamidomethyl [C11]; 2xPhospho [S16; T/S]	0	0	0	0	0	0	0	0	0	0	818784	0	0	0	0	0	0	0	0	0	0	0	0	0	902433	0	0	0	0	0	0	0	0	0	1.36071e+06	0	0	0	0	3.15431e+06	0	0	1.39568e+06
K7EMC4	Zinc finger and SCAN domain-containing protein 5A	ZSCAN5A	ZSCAN5;ZSCAN5A;ZSCAN5B	EENPGLTSPEPQLPKSPTDLVR	S99	1xPhospho [S16]	0	0	0	0	0	0	0	0	0	0	0	0	0	0	0	48557.9	97280	0	0	0	0	0	0	0	0	0	0	1.70146e+06	472931	0	0	0	0	0	0	0	0	0	0	0	0	0	0
H3BMU4	Zinc finger and SCAN domain-containing protein 29 (Fragment)	ZSCAN29	ZSCAN29	ARSPDLGPQEQMNPK	S74	1xPhospho [S3]	9.20332e+06	2.5135e+06	4.30702e+06	5.33543e+06	8.14172e+06	2.97062e+06	8.53656e+06	5.78309e+06	0	1.91183e+07	1.0309e+07	2.22781e+06	9.85154e+06	6.26435e+06	5.76638e+06	3.96673e+06	1.15359e+07	9.43295e+06	4.13898e+06	5.58314e+06	9.3226e+06	0	8.28667e+06	9.16189e+06	1.01093e+07	1.18646e+07	6.32708e+06	8.09711e+06	7.78792e+06	9.14822e+06	6.82299e+06	4.62326e+06	0	1.2724e+07	2.59472e+06	4.73476e+06	4.48911e+06	4.02247e+06	3.24947e+06	3.37222e+06	3.45782e+06	0	8.16555e+06
H3BMU4	Zinc finger and SCAN domain-containing protein 29 (Fragment)	ZSCAN29	ZSCAN29	ARSPDLGPQEQMNPK	S74	1xPhospho [S3]; 1xOxidation [M12]	0	0	1.94645e+06	0	4.09265e+06	0	6.16928e+06	4.90599e+06	0	0	2.35366e+06	0	0	0	0	0	0	0	0	0	0	0	0	0	0	0	3.83649e+06	0	0	0	1.77873e+06	1.86185e+06	0	0	2.7888e+06	1.2624e+06	0	0	1.8703e+06	0	0	5.71822e+06	4.59585e+06
Q15696	U2 small nuclear ribonucleoprotein auxiliary factor 35 kDa subunit-related protein 2	ZRSR2	ZRSR2	DIYLSPDR	S349	1xPhospho [S5]	1.27748e+07	2.96129e+07	3.33123e+07	2.78744e+07	2.47322e+07	1.63764e+07	2.75281e+07	2.48698e+07	1.64934e+07	1.97668e+07	2.21926e+07	1.28902e+07	1.94308e+07	0	1.3122e+07	2.35827e+07	1.84865e+07	1.71427e+07	1.98329e+07	2.77559e+07	2.56903e+07	1.83373e+07	1.42213e+07	2.03202e+07	1.41757e+07	1.92881e+07	1.97438e+07	2.28154e+07	2.19064e+07	1.83197e+07	2.85448e+07	1.59054e+07	0	1.39209e+07	2.44815e+07	1.07543e+07	3.41453e+07	2.08422e+07	9.10644e+06	3.12252e+07	1.91979e+07	3.26502e+07	2.58231e+07
O95218	Zinc finger Ran-binding domain-containing protein 2	ZRANB2	ZRANB2	LDEDEDEDDADLSKYNLDASEEEDSNKK	S188	1xPhospho [S20]	0	0	4.49583e+06	6.44254e+07	0	0	6.82809e+06	6.53018e+06	0	0	4.14267e+06	0	0	0	4.81429e+06	7.1372e+06	0	7.30424e+06	0	6.93628e+06	2.92784e+06	1.20864e+07	5.48401e+06	2.40144e+06	0	9.13861e+06	2.05861e+06	3.27143e+06	3.47399e+06	2.64711e+06	2.56484e+06	2.9823e+06	1.87276e+06	0	0	0	8.35169e+06	1.64498e+06	2.39669e+06	4.35035e+06	0	0	4.33574e+06
O95218	Zinc finger Ran-binding domain-containing protein 2	ZRANB2	ZRANB2	LDEDEDEDDADLSKYNLDASEEEDSNK	S188	1xPhospho [S20]	0	8.35541e+06	6.67967e+06	4.48717e+06	4.55879e+06	0	3.82101e+06	5.48559e+06	0	0	2.21935e+06	0	0	405570	0	1.85342e+06	2.99452e+06	6.03167e+06	3.87121e+06	6.39369e+06	0	2.74314e+06	0	3.46245e+06	2.3025e+06	9.21875e+06	3.28825e+06	2.45484e+06	4.19713e+06	1.1099e+06	3.47106e+06	2.63012e+06	0	0	3.29395e+06	1.30961e+06	7.48632e+06	0	0	0	0	0	2.56959e+06
O95218	Zinc finger Ran-binding domain-containing protein 2	ZRANB2	ZRANB2	EESDGEYDEFGRK	S120	1xPhospho [S3]	7.59196e+06	1.82172e+07	8.15564e+06	3.42179e+06	5.58299e+06	1.38663e+07	6.39427e+06	5.82835e+06	4.06136e+06	8.8519e+06	8.16581e+06	1.61216e+07	1.13551e+07	2.22029e+06	6.20268e+06	5.7499e+06	2.73991e+06	7.28199e+06	4.34733e+06	3.20267e+06	5.37916e+06	1.66662e+07	3.09922e+06	1.93616e+06	2.8132e+06	4.81895e+06	2.42043e+06	2.72012e+06	5.26499e+06	6.1865e+06	5.44794e+06	4.46358e+06	0	5.80715e+06	3.2289e+06	2.30067e+06	1.06243e+07	8.54699e+06	4.2656e+06	2.52861e+07	1.4442e+07	1.37697e+07	1.64701e+07
O95218	Zinc finger Ran-binding domain-containing protein 2	ZRANB2	ZRANB2	AVGPASILKEVEDKESEGEEEDEDEDLSK	S143	2xPhospho [S6; S16]	0	2.36956e+06	8.17501e+06	519529	356234	0	0	0	0	0	0	0	0	0	0	0	183271	0	0	0	133160	0	0	0	171214	0	0	0	59673.1	0	0	0	483208	226997	0	159422	3.26793e+06	253490	0	0	0	0	942690
O95218	Zinc finger Ran-binding domain-containing protein 2	ZRANB2	ZRANB2	AVGPASILKEVEDKESEGEEEDEDEDLSK	S153	2xPhospho [S6; S16]	0	2.36956e+06	8.17501e+06	519529	356234	0	0	0	0	0	0	0	0	0	0	0	183271	0	0	0	133160	0	0	0	171214	0	0	0	59673.1	0	0	0	483208	226997	0	159422	3.26793e+06	253490	0	0	0	0	942690
O95218	Zinc finger Ran-binding domain-containing protein 2	ZRANB2	ZRANB2	ESEGEEEDEDEDLSK	S153	1xPhospho [S2]	0	1.90786e+06	0	0	3.6244e+06	7.15935e+06	2.43622e+06	2.63598e+06	0	0	0	0	5.00744e+06	0	0	0	0	1.8112e+06	0	0	0	0	0	0	0	0	0	0	0	0	0	0	0	0	0	0	0	0	0	1.3066e+07	8.1367e+06	6.15182e+06	4.57126e+06
O95218	Zinc finger Ran-binding domain-containing protein 2	ZRANB2	ZRANB2	YNLDASEEEDSNK	S188	1xPhospho [S6]	1.73478e+07	5.58872e+07	1.16126e+08	4.25845e+07	7.42125e+07	6.55698e+07	5.04736e+07	7.31433e+07	5.5337e+07	8.07436e+07	7.1331e+07	4.53723e+07	1.92773e+07	2.47218e+07	2.43065e+07	6.22914e+07	5.98042e+07	8.3742e+07	2.37799e+07	7.76149e+07	9.8512e+07	4.03688e+07	6.36911e+07	6.69779e+07	3.02055e+07	1.12768e+08	5.53104e+07	6.83058e+07	6.49368e+07	5.00122e+07	7.53766e+07	5.54904e+07	5.85865e+07	3.26021e+06	0	811744	1.52975e+08	1.07985e+06	1.86927e+07	7.65063e+07	4.62112e+07	5.08214e+07	6.27987e+07
O95218	Zinc finger Ran-binding domain-containing protein 2	ZRANB2	ZRANB2	EVEDKESEGEEEDEDEDLSK	S153	1xPhospho [S7]	1.30295e+08	4.93891e+08	7.2612e+08	4.90595e+08	5.81964e+08	1.99156e+08	5.22926e+08	6.28074e+08	1.97325e+08	5.04692e+08	7.88739e+08	4.38686e+08	1482203711	2.21439e+08	3.20543e+08	6.39316e+08	5.07877e+08	5.97255e+08	1.14831e+08	7.05045e+08	7.29704e+08	6.06883e+08	5.8604e+08	4.20503e+08	3.91149e+08	9.34656e+08	6.00439e+08	7.01852e+08	6.36158e+08	5.48628e+08	738724100	7.85202e+08	3.02431e+08	6.97516e+08	6.1828e+08	3.3141e+08	8.83676e+08	6.92031e+08	584910854	1086801738	6.85034e+08	1051133884	805775677
O95218	Zinc finger Ran-binding domain-containing protein 2	ZRANB2	ZRANB2	EVEDKESEGEEEDEDEDLSKYK	S153	1xPhospho [S7]	0	1.32389e+07	7.18389e+06	1.07314e+07	1.39073e+07	0	9.95853e+06	4.43345e+06	0	1.12053e+07	1.14159e+07	0	5.17628e+06	0	2.20614e+07	1.08379e+07	4.64685e+06	8.5086e+06	0	1.13584e+07	7.05177e+06	3.08894e+07	1.15765e+07	2.86113e+06	1.10052e+07	1.12949e+07	8.11387e+06	6.63846e+06	6.85215e+06	5.73039e+06	9.00826e+06	1.59957e+07	0	9.99914e+06	0	2.88735e+06	0	9.23368e+06	2.93564e+07	1.83958e+07	0	1.73117e+07	1.22692e+07
O95218	Zinc finger Ran-binding domain-containing protein 2	ZRANB2	ZRANB2	TGYGGGFNERENVEYIEREESDGEYDEFGR	S120	1xPhospho [S21]	0	0	0	0	0	0	0	0	0	0	0	0	0	0	0	0	245730	0	647775	0	0	6.59066e+06	0	0	0	0	0	0	0	940124	0	0	0	0	0	0	0	181556	8.40877e+06	0	0	0	0
O95218	Zinc finger Ran-binding domain-containing protein 2	ZRANB2	ZRANB2	AVGPASILK	S143	1xPhospho [S6]	0	0	3.21643e+06	0	0	0	0	1.17126e+06	0	0	1.58119e+06	1.12018e+06	0	0	0	0	1.21942e+06	0	0	0	806699	0	0	0	0	0	0	1.49448e+06	0	978439	0	0	0	0	722425	2.52235e+06	2.05165e+06	0	0	0	1.35765e+06	0	1.93422e+06
H7C0E5	Zinc finger protein ZPR1 (Fragment)	ZPR1	ZPR1	NPFTLGDSSNPGQTER	S303	1xPhospho [S9]	0	0	0	2.00332e+06	0	0	0	0	0	0	0	0	0	0	0	0	0	0	0	0	0	0	0	0	0	1.10727e+06	4.25994e+06	0	0	0	1.72128e+06	0	0	0	0	0	0	0	849763	0	0	0	0
Q8NHG8	E3 ubiquitin-protein ligase ZNRF2	ZNRF2	ZNRF2	LVIGSLPAHLSPHMFGGFK	S145	1xPhospho [S5]; 1xOxidation [M14]	0	0	0	0	0	0	0	0	0	0	0	0	0	0	0	0	0	0	0	0	0	0	0	0	0	0	0	0	0	0	0	0	0	0	0	0	0	0	0	0	0	0	0
Q8NHG8	E3 ubiquitin-protein ligase ZNRF2	ZNRF2	ZNRF2	AAQSPFSIPNSSSGPYGSQDSVHSSPEDGGGGR	S116	2xPhospho [S21; S]	0	1.64731e+06	0	0	0	1.90594e+06	0	1.21685e+06	0	170191	0	0	0	0	0	777177	171727	0	337772	1.03071e+06	0	0	0	0	0	3.85936e+06	804139	1.65683e+06	0	0	968215	1.19506e+06	0	2.78804e+06	0	663347	3.5248e+06	108490	0	0	0	0	1.61562e+06
Q8NHG8	E3 ubiquitin-protein ligase ZNRF2	ZNRF2	ZNRF2	DRPVGGSPGGPR	S135	1xPhospho [S7]	5.13991e+07	1.72438e+07	2.68265e+07	4.25711e+07	1.70492e+07	8.38055e+06	1.75973e+07	0	7.6356e+06	4.02309e+07	2.27647e+07	1.76949e+07	1.60429e+07	5.17678e+07	2.14672e+07	3.7977e+07	3.29507e+07	2.11058e+07	2.52326e+07	3.01644e+07	3.10169e+07	1.26391e+07	5.8442e+07	3.72317e+07	3.82928e+07	7.61703e+07	3.13022e+07	2.67651e+07	3.35492e+07	5.55757e+07	3.45269e+07	4.43121e+07	96210.7	2.74251e+07	7.4635e+07	2.00182e+07	4.98797e+07	4.62429e+07	2.88308e+07	3.3983e+07	1.66453e+07	4.25801e+07	1.62083e+07
Q8NHG8	E3 ubiquitin-protein ligase ZNRF2	ZNRF2	ZNRF2	SRSLGGAVGSVASGAR	S82	2xPhospho [S3; S10]	0	0	0	0	0	0	0	0	0	0	1.17214e+06	0	0	0	0	0	0	0	0	0	0	0	0	0	0	0	0	586305	0	1.93828e+06	0	0	0	0	0	734863	0	1.50021e+06	0	0	0	0	0
Q8NHG8	E3 ubiquitin-protein ligase ZNRF2	ZNRF2	ZNRF2	SRSLGGAVGSVASGAR	S89	2xPhospho [S3; S10]	0	0	0	0	0	0	0	0	0	0	1.17214e+06	0	0	0	0	0	0	0	0	0	0	0	0	0	0	0	0	586305	0	1.93828e+06	0	0	0	0	0	734863	0	1.50021e+06	0	0	0	0	0
H3BRB6	E3 ubiquitin-protein ligase ZNRF1	ZNRF1	ZNRF1	ASLADALPLHIAPR	S123	1xPhospho [S2]	0	0	1.35964e+06	0	0	0	0	0	0	0	0	0	0	0	0	0	0	0	0	0	0	0	0	0	0	0	0	0	0	0	0	0	0	0	0	0	0	0	0	0	0	0	0
F5H630	Zinc finger protein 84	ZNF84	ZNF84	SNSEGDLDGLILK	S127	1xPhospho [S3]	0	0	0	873735	0	0	0	1.33977e+06	0	0	0	0	0	0	1.85977e+06	0	0	0	0	0	0	0	0	0	0	0	0	2.71195e+06	0	0	0	0	0	0	0	0	681404	0	0	0	0	0	1.83894e+06
A8K0R7	Zinc finger protein 839	ZNF839	ZNF839;DKFZp434M1123	ACSETLAESR	S316	1xCarbamidomethyl [C2]; 1xPhospho [S3]	0	0	1.21473e+06	988774	1.6986e+06	0	0	0	0	0	0	0	0	0	947318	0	0	0	0	0	0	0	2.16478e+06	2.01585e+06	0	0	0	1.85346e+06	0	0	0	0	0	0	0	0	0	0	0	0	0	0	0
A0A590UJE4	Zinc finger protein 827 (Fragment)	ZNF827	ZNF827	TSQGGAGVSPLLVK	S343	1xPhospho [S9]	1.25491e+07	7.05271e+06	1.43758e+07	1.06045e+07	1.24098e+07	1.43379e+07	1.58258e+07	1.70753e+07	2.39299e+07	0	2.06739e+07	2.68536e+07	1.74607e+07	0	1.23557e+07	1.03083e+07	1.81028e+07	9.85919e+06	1.58931e+07	9.48966e+06	13280066	4.33761e+06	9.19722e+06	7.72428e+06	7.95719e+06	8.24754e+06	1.93661e+07	6.31951e+06	7.18355e+06	1.26803e+07	1.07456e+07	1.22846e+07	0	0	1.22573e+07	2.13383e+07	1.3994e+07	8.04374e+06	1.50454e+07	1.07e+07	9.04779e+06	6.56144e+06	1.31687e+07
A0A590UJE4	Zinc finger protein 827 (Fragment)	ZNF827	ZNF827	VKEEIPDPDVKGSPHLSDSACLGQQR	S302	1xCarbamidomethyl [C21]; 1xPhospho [S13]	0	0	532648	0	0	0	0	0	0	0	0	0	0	0	0	0	0	0	0	0	828634	0	999678	0	0	0	0	493227	1.11218e+06	0	573025	0	0	0	1.76609e+06	865812	836398	0	994745	0	0	0	0
B7Z6K7	Zinc finger protein 814	ZNF814	ZNF552;ZNF814	TPMAGVSPK	S87	1xPhospho [S7]	0	0	0	0	0	0	0	0	0	0	0	0	0	0	0	0	0	0	0	0	0	0	0	0	0	0	1.60814e+06	0	0	0	0	0	0	0	0	0	0	0	0	0	0	0	1.26857e+06
Q8NCA9	Zinc finger protein 784	ZNF784	ZNF784	SQEPLDLVLVPDDCRPGTPPSDLIEIQVVK	T37	1xCarbamidomethyl [C14]; 1xPhospho [T18]	786096	0	1.25927e+06	0	420485	281198	0	0	0	506841	332231	0	0	0	0	2.46843e+06	613826	210848	1.66521e+06	0	464850	0	0	66941.2	717588	0	395793	26416.2	162794	1.03316e+06	692507	175014	629908	0	0	140975	0	1.51569e+06	437105	0	0	0	0
Q9ULD5	Zinc finger protein 777	ZNF777	ZNF777;KIAA1285	GERPTMQEQEDSEEGETPTDPSAAHDGIVIK	S351	1xPhospho [S12]; 1xOxidation [M6]	0	0	0	1.77135e+06	862724	0	0	2.90802e+06	1.71516e+06	0	902186	0	0	0	0	3.56537e+06	0	1.55143e+06	0	1.84687e+06	0	0	0	0	931084	0	2.31941e+06	0	2.10081e+06	1.9932e+06	0	1.22819e+06	0	0	1.19386e+06	2.01614e+06	3.07045e+06	0	1.58143e+06	0	0	0	1.64672e+06
Q9ULD5	Zinc finger protein 777	ZNF777	ZNF777;KIAA1285	EIPSLSPTIPR	S47	1xPhospho [S6]	0	0	1.05874e+06	0	0	0	884024	0	0	0	497127	0	0	0	692459	0	0	0	0	0	0	0	0	0	0	0	0	1.69991e+06	2.61403e+06	0	0	0	0	0	1.3686e+06	934402	0	0	2.40919e+06	0	0	0	0
Q32MQ0	Zinc finger protein 750	ZNF750	ZNF750	HVEFESPIPEAK	S379	1xPhospho [S6]	1.11913e+06	0	2.90156e+06	0	0	0	0	0	0	0	0	0	0	0	0	0	0	0	0	450391	0	0	0	0	0	0	0	0	0	0	0	0	0	0	796675	0	0	909796	0	0	0	0	1.98221e+06
Q6NUN9	Zinc finger protein 746	ZNF746	ZNF746	DMGELSPAVAQEETPPGDWLFGGVR	S359	1xPhospho [S6]; 1xOxidation [M2]	0	0	275910	0	87600.4	146591	0	30937.5	0	0	58231.4	0	0	0	0	0	0	0	0	25511.6	0	0	0	0	49571.4	0	0	37637.1	0	0	48558.7	0	0	174482	73291.3	0	42904.5	0	324312	0	0	0	0
Q8NDX6	Zinc finger protein 740	ZNF740	ZNF740	AGSPDVLR	S44	1xPhospho [S3]	9.80831e+07	9.40917e+07	1.26864e+08	1.18008e+08	1.51401e+08	6.88744e+07	9.39606e+07	1.0445e+08	5.25854e+07	1.19226e+08	1.28402e+08	7.23455e+07	1.33623e+08	1.03579e+08	1.09258e+08	1.46124e+08	8.67953e+07	8.96166e+07	8.88579e+07	1.3854e+08	1.13027e+08	4.81244e+07	1.48006e+08	8.37615e+07	1.22725e+08	7.06073e+07	1.16708e+08	2.53463e+08	8.85251e+07	8.10631e+07	7.6566e+07	1.19798e+08	1.81124e+08	6.77157e+07	9.6613e+07	5.28379e+07	1.14396e+08	9.64193e+07	9.62515e+07	5.71128e+07	1.6228e+08	1.23549e+08	8.11965e+07
H0YAP1	Zinc finger protein 706 (Fragment)	ZNF706	ZNF706	AALIYTCTVCR	T14	2xCarbamidomethyl [C7; C10]; 1xPhospho [T8]	1.73512e+06	1.28657e+06	0	934839	2.6385e+06	3.08114e+06	1.24273e+06	1.40955e+06	0	0	1.51695e+06	0	0	0	2.22895e+06	1.59427e+06	1.45204e+06	1.06186e+06	958145	466806	1.38267e+06	0	1.68087e+06	0	0	1.72848e+06	0	0	0	1.72288e+06	0	1.842e+06	0	1.03395e+06	0	0	1.77898e+06	0	2.12912e+06	2.67892e+06	0	0	1.07363e+06
Q6ZNC4	Zinc finger protein 704	ZNF704	ZNF704	SAPTTLYLVHTDHAYQATPPVTIPGSAK	S294	1xPhospho [S1]	0	0	0	0	0	0	0	0	0	0	247075	0	0	0	0	1.10295e+06	147288	0	0	0	0	0	0	0	0	0	0	0	0	0	0	170727	0	0	0	0	0	432253	0	0	0	0	0
Q6ZNC4	Zinc finger protein 704	ZNF704	ZNF704	LNTDSVADGLSSLAPVSPSQSLASPPTFPIPDSSR	T243	1xPhospho [T3]	268796	0	0	0	0	139653	0	772637	0	0	481782	0	0	0	0	212109	151091	91428.3	224444	88161.9	133491	0	164053	0	0	79516.1	0	412099	0	0	0	0	0	288726	0	0	147757	0	660449	0	0	0	192932
Q6ZNC4	Zinc finger protein 704	ZNF704	ZNF704	QHAHTVLSSPPR	S367	1xPhospho [S9]	9.7837e+06	1.29167e+07	3.68892e+06	1.70658e+07	2.50063e+07	2.22988e+06	3.72433e+07	6.91125e+06	3.18666e+06	8.55004e+06	1.63214e+07	3.92112e+06	3.89617e+07	2.56343e+06	4.70336e+07	3.29099e+07	3.10096e+06	1.35145e+07	1.01833e+07	5.82125e+06	3.52928e+06	2.18661e+06	5.98596e+07	1.40319e+06	2.63082e+07	0	2.64202e+07	4.43217e+06	4.47362e+06	1.45642e+07	7.01493e+06	3.59072e+07	0	1.41938e+06	4.00976e+06	4.21279e+06	1.81838e+06	1.34254e+07	2.79255e+07	1.44543e+07	1.97082e+07	1.57191e+07	1.02836e+07
Q9H7S9	Zinc finger protein 703	ZNF703	ZNF703	DQEPKPSPEPAAVSR	S252	1xPhospho [S7]	1.00873e+07	8.06331e+06	8.2808e+06	6.57542e+06	1.11265e+07	6.37474e+06	8.54968e+06	9.7529e+06	8.84367e+06	1.63891e+07	1.28722e+07	1.05639e+07	4.68567e+06	1.56001e+07	9.28986e+06	1.43522e+07	1.10046e+07	9.09178e+06	1.05058e+07	8.70059e+06	1.3317e+07	3.21868e+06	1.79342e+07	1.95307e+07	2.05712e+07	2.77712e+07	1.08624e+07	2.0487e+07	7.96916e+06	1.48001e+07	1.36197e+07	1.50111e+07	9.49028e+06	0	1.95408e+06	6.40637e+06	1.34757e+07	2.53527e+07	7.60712e+06	8.32301e+06	2.83583e+07	2.40756e+07	1.21907e+07
Q9H7X3	Zinc finger protein 696	ZNF696	ZNF696	AHSGERPYACAECGK	S176	2xCarbamidomethyl [C10; C13]; 1xPhospho [S3]	0	0	0	0	0	0	0	0	0	0	3.23961e+06	7.75525e+06	7.693e+06	0	0	0	0	2.82933e+06	0	0	0	0	0	0	0	0	0	0	0	0	0	0	0	0	0	0	0	0	0	7.3792e+06	0	1.03528e+07	0
Q5VV50	Zinc finger protein 691	ZNF691	ZNF691	EQSPEPHLPEEGEGGKPWR	S30	1xPhospho [S3]	1.76025e+06	2.59412e+06	4.25634e+06	5.06397e+06	4.65468e+06	4.5928e+06	2.76119e+06	2.64179e+06	3.61581e+06	0	2.77908e+06	0	1.44675e+07	0	6.97118e+06	3.66818e+06	1.15198e+06	4.89473e+06	3.3396e+06	3.83722e+06	2.36243e+06	4.63439e+06	7.25411e+06	1.02749e+07	5.42428e+06	0	1590118	2.07094e+06	1.7806e+06	0	3.01868e+06	2.92434e+06	0	0	2.54876e+06	0	4.09907e+06	3.3957e+06	1.85257e+06	8.75894e+06	4.83259e+06	2.55656e+06	4.51805e+06
Q8N1G0	Zinc finger protein 687	ZNF687	ZNF687	HGLQLGAQSPGR	S1057	1xPhospho [S9]	4.11838e+07	1.58571e+07	6.86887e+07	2.47398e+07	3.28233e+07	3.00701e+07	4.4329e+07	4.84056e+07	1.74283e+07	1.87729e+07	4.87889e+07	2.22595e+07	1.00765e+08	2.19329e+07	4.3727e+07	2.65434e+07	2.6387e+07	1.88997e+07	1.37602e+07	8.26198e+07	4.53935e+07	5.32348e+06	4.07007e+07	7.59117e+07	4.92744e+07	4.57471e+07	7.81268e+07	1.40141e+08	5.25428e+07	2.7993e+07	2.14384e+07	4.00476e+07	2.56241e+07	7.86366e+07	4.06331e+07	5.27118e+07	6.41337e+07	4.32104e+07	52753693	2.4833e+07	3.17648e+07	1.06907e+07	4.62883e+07
Q8N1G0	Zinc finger protein 687	ZNF687	ZNF687	ASALGLGDGEEEAPPSRSDPDGGDSPLPASGGPLTCK	S1184	1xCarbamidomethyl [C36]; 2xPhospho [S18; S25]	0	0	0	729999	653169	0	899307	0	1.32259e+06	0	0	90014.5	0	0	0	0	0	0	0	156090	759071	331654	299066	123778	924274	0	0	1.50013e+06	0	722881	326186	402831	0	1.0444e+06	0	0	0	543315	0	0	0	0	0
Q8N1G0	Zinc finger protein 687	ZNF687	ZNF687	ASALGLGDGEEEAPPSRSDPDGGDSPLPASGGPLTCK	S1191	1xCarbamidomethyl [C36]; 2xPhospho [S18; S25]	0	0	0	729999	653169	0	899307	0	1.32259e+06	0	0	90014.5	0	0	0	0	0	0	0	156090	759071	331654	299066	123778	924274	0	0	1.50013e+06	0	722881	326186	402831	0	1.0444e+06	0	0	0	543315	0	0	0	0	0
Q8N1G0	Zinc finger protein 687	ZNF687	ZNF687	GAGGALLTPK	T900	1xPhospho [T8]	0	1.59088e+06	9.56622e+06	4.07734e+06	2.38757e+06	1.33885e+07	2.94266e+06	1.12758e+06	1.45274e+06	3.78412e+06	5.95112e+06	1.69018e+06	6.80789e+06	0	1.16619e+06	1.4127e+06	1.43254e+06	1.85215e+06	1.13758e+06	1.59294e+06	1.41938e+06	0	1.28418e+06	1.3377e+06	1.30107e+06	2.16008e+06	2.85444e+06	2.62717e+06	818399	2.2592e+06	1.70904e+06	1.0861e+06	0	915461	840908	2.71975e+06	1.88749e+06	1.45278e+06	1.32898e+06	4.80063e+06	2.89752e+06	8.14892e+06	2.95962e+06
Q8N1G0	Zinc finger protein 687	ZNF687	ZNF687	TQSSLVEAFNK	S495	1xPhospho [S3]	0	850513	0	0	492293	6.44913e+06	1.12707e+06	0	0	0	1.67047e+06	0	1.57614e+07	0	589331	0	0	0	0	0	390488	0	0	0	0	0	0	0	0	0	0	0	0	3.73016e+06	0	2.45555e+06	0	2.09015e+06	0	0	3.39627e+06	0	0
Q8N1G0	Zinc finger protein 687	ZNF687	ZNF687	TVTQVPSDPDPPAPLAEGAFLAEASLLKLSPATPTSEGPK	S374	1xPhospho [S30]	0	0	0	0	0	192550	0	0	0	0	63270	0	0	0	0	0	128973	0	169828	0	99222.7	181186	0	0	118132	69530.5	68950.9	198863	0	0	0	0	335619	0	0	0	0	0	0	0	0	0	0
Q8N1G0	Zinc finger protein 687	ZNF687	ZNF687	QSPGHQSPLASPK	S266	1xPhospho [S2]	0	4.23077e+06	1.33798e+06	1.90135e+06	6.08518e+06	2.17833e+06	5.01835e+06	2.55761e+06	3.08986e+06	3.75286e+06	2.60103e+06	4.57638e+06	1.40916e+07	1.19195e+07	3.03367e+06	1.75958e+06	2.73232e+06	2.01262e+06	3.54119e+06	3.49042e+06	3.42567e+06	3.53945e+06	3.8548e+06	8.09757e+06	2.28671e+06	2.77539e+06	3.52082e+06	4.84288e+06	2.25986e+06	2.36408e+06	2.10281e+06	5.24416e+06	0	1.39318e+06	1.14303e+07	3.22535e+06	0	4.9284e+06	4.57769e+06	0	0	0	3.79179e+06
Q8N1G0	Zinc finger protein 687	ZNF687	ZNF687	SSSSTEQSLMMGLR	S1118	1xPhospho [S3]; 2xOxidation [M10; M11]	0	0	1.80456e+06	0	0	0	0	0	0	0	0	0	1.16283e+06	0	0	0	0	0	0	0	0	0	0	0	0	0	0	0	0	0	0	0	0	0	0	0	0	0	0	0	0	0	0
Q8N1G0	Zinc finger protein 687	ZNF687	ZNF687	QSPGHQSPLASPK	S271	2xPhospho [S7; S]	4.91569e+06	3.75114e+06	1.21189e+07	6.7322e+06	9.74582e+06	2.56039e+06	0	3.65349e+06	1.54607e+07	0	5.58512e+06	0	1.37206e+07	6.96587e+06	1.43678e+06	0	2.00629e+06	0	0	1.45812e+07	1.80943e+07	0	1.49666e+07	2.07657e+07	4.97112e+06	9.16848e+06	2.7936e+06	1.48327e+07	7.46521e+06	0	0	2.16936e+06	0	3.16224e+06	2.15764e+07	2.31442e+06	5.38251e+06	3.91476e+07	0	8.59937e+06	5.77834e+06	1.46494e+07	1.13592e+07
C9J092	Zinc finger protein 668 (Fragment)	ZNF668	ZNF668	MEVEAAEARSPAPGYK	S10	1xAcetyl [N-Term]; 1xPhospho [S10]	0	0	0	0	0	3.03319e+06	0	0	0	0	0	0	2.49776e+06	0	0	0	0	0	0	2.9634e+06	0	0	3.8026e+06	3.20578e+06	0	0	0	7.29699e+06	0	2.179e+06	0	0	0	0	0	1.59889e+06	4.68293e+06	0	0	0	0	2.86855e+06	0
D6W5T3	Zinc finger protein 655, isoform CRA_a	ZNF655	ZNF655;DKFZp686M1631	MEEIPAQEAAGSPR	S12	1xAcetyl [N-Term]; 1xPhospho [S12]	3.67498e+06	3.8908e+06	2.5842e+06	1.50749e+06	2.07312e+06	2.94323e+06	3.05262e+06	3.95213e+06	1.97299e+06	0	4.07894e+06	1.09937e+06	0	0	5.01946e+06	0	0	3.05608e+06	0	5.58041e+06	2.36549e+06	0	3.56654e+06	4.94974e+06	2.55997e+06	4.25561e+06	2.7012e+06	5.95111e+06	3.66754e+06	0	3.34017e+06	3.74499e+06	0	4.77637e+06	0	1.94288e+06	3.70955e+06	4.82633e+06	2.99398e+06	5.81027e+06	9.32724e+06	0	4.75405e+06
D6W5T3	Zinc finger protein 655, isoform CRA_a	ZNF655	ZNF655;DKFZp686M1631	EGSPGDQAAALLTAR	S60	1xPhospho [S3]	0	0	0	0	0	0	0	0	0	0	0	0	0	0	0	0	0	0	0	0	0	0	0	0	0	0	0	1.4901e+06	1.0028e+06	0	0	0	0	0	0	0	880836	770498	0	0	0	0	0
D6W5T3	Zinc finger protein 655, isoform CRA_a	ZNF655	ZNF655;DKFZp686M1631	EVLRDDCSDGETREENK	S151	1xCarbamidomethyl [C7]; 1xPhospho [S8]	0	0	8.73467e+06	2.03447e+06	862744	1.06374e+06	0	0	0	0	0	0	1.77451e+07	0	0	0	2.35793e+06	1.57147e+06	0	4.92586e+06	0	0	1.05208e+06	8.8677e+06	0	1.97283e+06	0	8.38566e+06	0	0	798919	0	0	1.37018e+06	6.05815e+06	2.16689e+06	2.12959e+06	1.55746e+07	0	1.57954e+07	1.39286e+07	1.89137e+07	1.34649e+07
D6W5T3	Zinc finger protein 655, isoform CRA_a	ZNF655	ZNF655;DKFZp686M1631	EVLRDDCSDGETR	S151	1xCarbamidomethyl [C7]; 1xPhospho [S8]	0	4.42884e+06	0	0	0	0	1.70753e+06	2.74235e+06	0	4.03157e+06	1.48864e+06	0	2.74992e+06	0	0	0	5.63499e+06	0	0	0	946081	0	0	2.05314e+06	0	1.9935e+06	1.64774e+06	0	0	0	0	0	0	0	0	1.67286e+06	1.13325e+06	2.10979e+06	0	0	0	8.03328e+06	0
M0QX90	Zinc finger protein 649	ZNF649	ZNF649	LEQGEPLWTLEDEIHSPAHPEIEK	S75	1xPhospho [S16]	0	0	0	0	0	0	61337.1	689445	151787	0	44330.9	0	0	260280	544122	0	142497	0	207552	0	0	0	0	0	0	0	0	0	0	160044	0	0	0	0	0	0	0	0	0	0	0	0	496070
O15015	Zinc finger protein 646	ZNF646	ZNF646	TETTMSPPR	S612	1xPhospho [S6]; 1xOxidation [M5]	0	0	3.48208e+06	1.38506e+06	988956	869852	1.37037e+06	0	2.02365e+06	807886	1.2842e+06	0	2.49082e+06	0	1.68396e+06	1.91275e+06	1.64077e+06	960412	0	2.01549e+06	0	0	1.22885e+06	949530	0	0	1.68691e+06	769153	0	1.32181e+06	0	0	0	0	0	1.48994e+06	0	0	1.5585e+06	0	0	0	0
O15015	Zinc finger protein 646	ZNF646	ZNF646	SADIGAEGAPSHLK	S521	1xPhospho [S1]	0	0	0	2.13493e+06	0	0	0	0	0	0	1.34023e+06	0	0	0	0	0	0	0	0	0	0	0	0	0	0	0	0	1.25708e+06	0	0	0	0	0	0	0	0	1.73323e+06	0	0	0	0	0	855562
A7E234	ZNF644 protein	ZNF644	ZNF644	HVVSPEQIATSDK	S999	1xPhospho [S4]	0	0	0	0	0	0	0	0	0	0	0	0	0	0	0	0	0	0	0	1.52235e+07	1.16838e+07	0	0	1.17602e+07	0	0	0	8.26676e+06	8.73684e+06	0	0	1.15222e+07	0	8.95449e+06	7.78847e+06	0	0	0	1.85866e+07	0	0	0	0
A7E234	ZNF644 protein	ZNF644	ZNF644	VAADLQLSTPQK	T165	1xPhospho [T9]	0	0	0	0	0	0	0	0	0	0	0	0	0	0	0	0	0	0	0	0	0	0	0	0	0	0	0	3.50239e+06	0	0	0	0	0	0	0	0	1.1419e+06	0	0	0	0	0	534141
A7E234	ZNF644 protein	ZNF644	ZNF644	KESSVGGEDLDSYPDFLHK	S818	1xPhospho [S3]	0	0	0	0	1.16004e+06	924176	1.51323e+06	0	0	0	1.20603e+06	0	0	0	745284	0	0	0	0	658403	2.43414e+06	0	1.22751e+06	1.09302e+06	0	752075	1.32322e+06	2.70604e+06	3.60071e+06	0	0	0	0	0	0	641794	1.63763e+06	907390	1.40796e+06	0	1.2734e+06	0	1.36809e+06
A7E234	ZNF644 protein	ZNF644	ZNF644	KCEESDSESPATFSTEEPSFYPCTK	S393	2xCarbamidomethyl [C2; C23]; 1xPhospho [S5]	0	1.00879e+06	0	0	0	0	0	0	0	0	2.11327e+06	0	0	0	0	0	0	0	0	880026	0	0	2.57913e+06	956253	0	0	0	808467	0	0	0	0	0	0	0	0	0	0	0	0	0	0	1.53217e+06
J3KR59	Zinc finger protein 639 (Fragment)	ZNF639	ZNF639	NQNYLVPSPVLR	S88	1xPhospho [S8]	0	0	222035	0	0	0	1.45066e+06	1.55874e+06	0	0	0	0	0	0	1.65911e+06	0	0	0	0	0	0	0	0	0	0	0	0	6.8425e+06	6.48468e+06	0	0	0	0	0	2.71528e+06	2.1718e+06	2.70178e+06	0	285203	0	0	0	0
Q14966	Zinc finger protein 638	ZNF638	ZNF638;NP220	KNYQSQADIPIRSPFGIVK	S383	1xPhospho [S13]	0	0	1.50173e+06	0	0	3.0208e+06	0	0	0	0	0	0	0	0	0	0	0	0	0	0	0	0	0	0	0	0	0	0	0	0	0	0	0	0	0	0	0	0	1.14305e+06	0	0	0	0
Q14966	Zinc finger protein 638	ZNF638	ZNF638;NP220	IDLPEVQIEHDPELEKESPGLK	S1100	1xPhospho [S18]	0	5.42612e+06	1.17728e+07	5.47333e+06	526542	1.47801e+07	8.23076e+06	1.09271e+07	5.37052e+06	0	1.22149e+07	0	3.3906e+06	0	9.27034e+06	86254.4	0	0	0	0	109161	0	0	0	0	0	0	2.26233e+07	1.69887e+07	0	283826	160392	0	0	1.34273e+07	1.12049e+07	1.17276e+07	504009	1.26677e+07	0	1.16171e+07	0	1.04641e+07
Q14966	Zinc finger protein 638	ZNF638	ZNF638;NP220	NLEDDTLSECKQVSDK	S650	1xCarbamidomethyl [C10]; 1xPhospho [S8]	0	1.557e+06	2.89812e+06	4.01239e+06	0	0	0	0	0	0	1.53766e+06	0	0	0	0	0	0	0	0	1.43366e+06	0	0	3.04205e+06	0	0	0	5.15702e+06	0	0	0	0	0	0	0	0	5.63698e+06	0	0	0	0	0	0	0
Q14966	Zinc finger protein 638	ZNF638	ZNF638;NP220	NYQSQADIPIRSPFGIVK	S383	1xPhospho [S12]	419217	0	6.68817e+06	0	0	232423	0	0	0	0	0	0	0	0	0	165010	0	97617.9	210967	0	121384	138847	94895	0	132024	0	87141	0	0	0	0	133871	0	0	67863.8	0	0	0	0	0	0	0	0
Q14966	Zinc finger protein 638	ZNF638	ZNF638;NP220	SRSPMHYMYRPR	S510	1xPhospho [S3]; 1xOxidation [M5]	0	0	0	0	751660	989144	457420	702298	0	0	0	0	0	0	0	0	0	0	0	702851	0	0	0	0	0	650594	899065	950956	1.02785e+06	0	0	0	0	0	0	0	0	0	0	0	0	0	1.98521e+06
Q14966	Zinc finger protein 638	ZNF638	ZNF638;NP220	TALLPSDSVFAEER	S1228	1xPhospho [S8]	0	0	161292	243131	0	0	0	0	0	0	0	0	0	0	0	0	0	0	0	0	54440.1	0	0	0	0	0	0	0	0	0	0	0	0	0	0	0	0	0	0	0	0	0	942271
Q14966	Zinc finger protein 638	ZNF638	ZNF638;NP220	SDSNLGGHSIR	S636	1xPhospho [S9]	0	0	1.65271e+06	1.43941e+06	1.62481e+06	849531	0	945975	0	0	2.18479e+06	0	0	0	0	0	1.15742e+06	710019	876323	1.13286e+06	0	0	0	0	0	0	0	1.14618e+06	0	0	0	891361	0	0	0	0	0	0	0	0	0	0	1.05767e+06
Q14966	Zinc finger protein 638	ZNF638	ZNF638;NP220	SRSPMHYMYRPR	S510	1xPhospho [S3]; 2xOxidation [M5; M8]	1.51393e+06	0	0	2.09284e+06	1.42115e+06	1.14286e+06	902682	0	0	0	1.73001e+06	0	0	0	1.46678e+06	0	0	0	0	1.33373e+06	0	0	0	0	0	0	0	1.13857e+06	881430	0	0	0	0	1.4384e+06	1.21281e+06	0	0	1.33328e+06	2.17864e+06	0	0	0	4.84292e+06
Q14966	Zinc finger protein 638	ZNF638	ZNF638;NP220	SRSPMHYMYRPR	S508	2xPhospho [S1; S3]	1.06436e+07	1.72373e+06	3.06976e+06	0	4.85688e+06	1.82997e+06	1.05324e+07	8.83572e+06	1.36138e+06	2.44738e+06	4.62137e+06	2.48412e+06	6.03171e+06	0	5.53317e+06	0	0	2.45716e+06	0	1.86595e+06	0	0	0	0	0	5.12884e+06	0	1.44579e+06	2.80925e+06	0	4.05253e+06	1.60833e+06	0	0	1.38785e+06	852388	1.53897e+06	1.28461e+06	3.96442e+06	24812624	2.20298e+07	0	1.50292e+07
Q14966	Zinc finger protein 638	ZNF638	ZNF638;NP220	SRSPMHYMYRPR	S510	2xPhospho [S1; S3]	1.06436e+07	1.72373e+06	3.06976e+06	0	4.85688e+06	1.82997e+06	1.05324e+07	8.83572e+06	1.36138e+06	2.44738e+06	4.62137e+06	2.48412e+06	6.03171e+06	0	5.53317e+06	0	0	2.45716e+06	0	1.86595e+06	0	0	0	0	0	5.12884e+06	0	1.44579e+06	2.80925e+06	0	4.05253e+06	1.60833e+06	0	0	1.38785e+06	852388	1.53897e+06	1.28461e+06	3.96442e+06	24812624	2.20298e+07	0	1.50292e+07
Q14966	Zinc finger protein 638	ZNF638	ZNF638;NP220	NPFRGSPK	S552	1xPhospho [S6]	2.43674e+07	1.88469e+07	3.99457e+06	3.76183e+07	4.67816e+07	1.14866e+07	2.77892e+07	6.2736e+06	1.23578e+07	3.30059e+07	7.20082e+06	2.21685e+07	3.72976e+06	3.05082e+07	1.82554e+07	4.1651e+07	3.82535e+07	3.1901e+07	2.20051e+07	6.08508e+07	6.80713e+07	1.64059e+07	4.84517e+07	3.83594e+07	5.16612e+07	3.72471e+07	3.72154e+07	6.22824e+07	5.15233e+07	3.59344e+07	1.97796e+07	5.24391e+07	5.98936e+07	2.77093e+07	4.1264e+07	3.47745e+07	4.66558e+07	5.45887e+07	2.32663e+07	58345441	6.5746e+07	6.54112e+06	5.84025e+07
Q14966	Zinc finger protein 638	ZNF638	ZNF638;NP220	SRSPMHYMYRPR	S508	2xPhospho [S1; S3]; 1xOxidation [M]	8.66123e+06	0	5.01979e+06	1.48765e+06	0	0	9.31995e+06	8.78957e+06	0	6.16259e+06	9.5905e+06	1.25646e+07	2.17059e+07	0	906459	1.49411e+06	2.69089e+06	3.48048e+06	1.34976e+06	4.36565e+06	842382	0	2.43622e+06	1.37165e+06	1.18444e+06	5.44833e+06	1.82208e+06	1.41124e+06	1.03982e+06	0	8.09484e+06	2.64594e+06	0	1.81776e+06	1.68831e+06	0	0	827937	0	5.21632e+07	4.67565e+07	4.49476e+07	5.05643e+07
Q14966	Zinc finger protein 638	ZNF638	ZNF638;NP220	SRSPMHYMYRPR	S510	2xPhospho [S1; S3]; 1xOxidation [M]	8.66123e+06	0	5.01979e+06	1.48765e+06	0	0	9.31995e+06	8.78957e+06	0	6.16259e+06	9.5905e+06	1.25646e+07	2.17059e+07	0	906459	1.49411e+06	2.69089e+06	3.48048e+06	1.34976e+06	4.36565e+06	842382	0	2.43622e+06	1.37165e+06	1.18444e+06	5.44833e+06	1.82208e+06	1.41124e+06	1.03982e+06	0	8.09484e+06	2.64594e+06	0	1.81776e+06	1.68831e+06	0	0	827937	0	5.21632e+07	4.67565e+07	4.49476e+07	5.05643e+07
Q14966	Zinc finger protein 638	ZNF638	ZNF638;NP220	MSGLHISGGQSVLEPIK	S299	1xPhospho [S7]	385488	0	0	0	0	0	1.3693e+06	741171	0	0	0	0	0	0	692849	0	0	0	0	0	53178.4	0	99613.3	50963.6	0	0	0	0	0	0	59876.9	73486.3	0	0	0	0	0	74761.3	0	0	0	0	0
Q9UEG4	Zinc finger protein 629	ZNF629	ZNF629	MEPETALWGPDLQGPEQSPNDAHR	S18	1xAcetyl [N-Term]; 1xPhospho [S18]	0	448394	843049	0	0	0	0	0	0	0	0	0	111813	0	603929	123990	0	0	0	72937.1	0	0	0	94915.3	125319	0	0	656848	0	0	0	0	0	0	0	0	56408.7	78431.3	64722.1	0	0	0	0
Q9UEG4	Zinc finger protein 629	ZNF629	ZNF629	GAESENEEESPR	S28	1xPhospho [S4]	3.6615e+06	0	0	0	0	0	0	0	0	0	0	0	2.57277e+06	0	0	2.89036e+06	2.3153e+06	0	2.43172e+06	0	1.46778e+06	0	2.34717e+06	1.85886e+06	0	0	0	2.49299e+06	0	0	0	2.96288e+06	0	0	0	0	3.77315e+06	2.25048e+06	0	0	0	0	0
Q9UEG4	Zinc finger protein 629	ZNF629	ZNF629	GNSYPGAAEGR	S625	1xPhospho [S3]	5.81966e+06	0	1.20964e+07	0	7.25854e+06	5.47823e+06	5.40571e+06	4.6446e+06	1.1924e+06	5.34333e+06	1.17757e+07	4.05018e+06	4.62724e+06	3.99428e+06	3.91206e+06	0	0	1.14833e+06	1.78383e+06	1.0384e+07	5.17123e+06	0	7.93833e+06	5.67642e+06	0	1.14497e+07	8.90785e+06	0	4.53343e+06	4.66371e+06	3.07035e+06	3.08431e+06	0	3.24293e+06	0	5.73285e+06	6.42361e+06	6.77869e+06	5.99794e+06	0	3.8838e+06	9.03957e+06	4.50007e+06
Q9UEG4	Zinc finger protein 629	ZNF629	ZNF629	SSSVLLEHLR	S753	1xPhospho [S3]	0	1.37976e+06	1.09972e+06	1.15261e+06	3.16143e+06	1.09716e+06	676647	978952	1.20291e+06	0	899694	0	0	0	687772	0	0	0	0	0	0	0	1.62051e+06	0	1.31131e+06	0	0	0	0	0	0	0	0	0	0	0	0	0	1.18106e+06	0	0	0	0
Q9P2J8	Zinc finger protein 624	ZNF624	ZNF624;ZNF391	SSSLIIHQR	S570	1xPhospho [S3]	0	0	1.05183e+06	0	0	1.55101e+06	0	0	0	0	1.52006e+06	0	1.10767e+06	0	943189	0	0	0	0	1.56875e+06	655115	0	1.06392e+06	0	863957	0	1.49755e+06	679570	0	0	0	0	0	0	677466	1.89627e+06	0	0	0	0	0	0	0
Q5T7W0	Zinc finger protein 618	ZNF618	ZNF618	DLHAVDVFSVEGAPENR	S216	1xPhospho [S9]	1.23129e+08	2.53269e+06	1.03273e+07	1.3477e+06	0	0	3.63853e+06	3.0093e+07	0	0	0	0	145137	0	1.35543e+06	276889	0	0	0	223182	39201.5	0	124165	395073	0	1.97201e+06	241503	2.80143e+07	1.80097e+07	345475	78369.8	354653	1.20308e+06	7.18954e+06	5.36409e+07	1.45328e+08	7.30299e+06	217689	1.67546e+06	0	0	0	1.10831e+07
Q5T7W0	Zinc finger protein 618	ZNF618	ZNF618	SPPAVVEEK	S429	1xPhospho [S1]	6.03387e+06	3.0358e+07	2.18637e+07	3.41074e+07	2.15252e+07	1.32349e+07	1.21925e+07	1.51156e+07	1.31893e+07	9.96177e+06	1.42578e+07	5.34148e+06	1.48398e+07	1.26525e+07	9.4488e+06	1.55679e+07	1.07337e+07	0	1.77592e+07	5.38555e+06	1.31238e+07	1.03115e+07	1.41968e+07	8.23409e+06	1.22258e+07	6.61385e+06	7.29247e+06	6.63189e+06	1.25451e+07	0	1.06808e+07	1.12955e+07	1.84193e+07	2.25732e+07	1.63202e+07	1.47309e+07	1.89962e+07	1.35353e+07	7.86196e+06	1.1456e+07	1.10407e+07	2.56338e+07	2.08422e+07
O15014	Zinc finger protein 609	ZNF609	ZNF609	RGSQNSSEHRPPASSTSEDVK	S413	1xPhospho [S3]	0	0	0	0	0	3.09546e+06	2.1505e+06	0	0	0	2.63844e+06	0	0	0	2.17907e+06	0	0	0	220558	0	0	0	0	0	0	0	0	0	0	0	0	0	0	0	2.68791e+07	0	3.9784e+06	0	1.14738e+06	0	0	0	0
O15014	Zinc finger protein 609	ZNF609	ZNF609	NCPSPVLIDCPHPNCNKK	S491	3xCarbamidomethyl [C2; C10; C15]; 1xPhospho [S4]	1.60806e+06	1.87318e+06	3.47101e+06	0	4.04136e+06	2.82573e+06	3.57721e+06	1.17977e+06	0	2.14253e+06	3.0468e+06	0	4.54237e+06	0	3.71835e+06	2.70751e+06	2.77147e+06	0	0	3.03534e+06	1.30767e+06	0	2.75019e+06	3.33415e+06	1.24725e+06	2.28812e+06	3.33315e+06	8.71748e+06	2.46205e+06	0	1.80759e+06	0	0	0	5.05578e+06	0	0	0	4.61243e+06	0	0	0	2.64578e+06
O15014	Zinc finger protein 609	ZNF609	ZNF609	NCPSPVLIDCPHPNCNK	S491	3xCarbamidomethyl [C2; C10; C15]; 1xPhospho [S4]	6.40331e+06	1.54954e+06	2.58026e+06	3.61966e+06	2.98255e+06	0	2.73354e+06	751989	0	0	0	7.03713e+06	6.22234e+06	0	6.08708e+06	5.9915e+06	0	4.17161e+06	5.79529e+06	3.51069e+06	2.79803e+06	4.44343e+06	5.56259e+06	3.8862e+06	2.32715e+06	0	3.40085e+06	7.59461e+06	2.54828e+06	0	2.46977e+06	4.07825e+06	7.52414e+06	1.73108e+06	4.27628e+06	4.09743e+06	0	0	2.95604e+06	7.15855e+06	1.638e+06	0	7.45632e+06
O15014	Zinc finger protein 609	ZNF609	ZNF609	ESSKELESPLTPGK	T746	1xPhospho [T11]	1.41839e+06	2.33368e+06	3.38998e+06	3.91898e+06	3.39835e+06	2.08254e+06	5.67308e+06	6.00768e+06	1.59568e+06	3.03505e+06	2.81872e+06	0	5.60601e+06	0	0	3.39775e+06	0	0	2.14497e+06	0	2.68632e+06	0	2.23235e+06	0	2.35865e+06	0	2.55147e+06	4.97789e+06	0	0	0	0	0	0	1.09772e+06	1.77952e+06	1.19119e+06	1.67479e+06	0	4.77355e+06	3.39706e+06	5.76089e+06	2.72214e+06
O15014	Zinc finger protein 609	ZNF609	ZNF609	TNSMGSATGPLPGTK	S467	1xPhospho [S3]	5.15311e+06	2.69368e+06	2.5212e+06	1.58575e+06	3.66358e+06	5.20013e+06	6.55685e+06	6.507e+06	0	4.15307e+06	5.19291e+06	3.3462e+06	1.06904e+07	0	1.26958e+07	5.43649e+06	3.2058e+06	3.61507e+06	1.76459e+06	5.8817e+06	5.84058e+06	0	4.29222e+06	4.30428e+06	3.2747e+06	4.08215e+06	4.20007e+06	1.06755e+07	7.78208e+06	2.74944e+06	3.32651e+06	3.10241e+06	0	0	6.10814e+06	6.9448e+06	6.61057e+06	6.72291e+06	7.90305e+06	5.71635e+06	5.30828e+06	0	8.43007e+06
O15014	Zinc finger protein 609	ZNF609	ZNF609	LVEPHSPSPSSK	S576	2xPhospho [S6; S8]	4.67642e+06	1.1051e+07	1.43887e+07	1.08617e+07	1.3015e+07	1.78481e+06	1.08752e+07	1.29611e+07	2.71839e+06	1.53287e+07	1.54773e+07	1.02503e+07	2.67989e+07	9.80468e+06	9.19862e+06	1.37001e+07	1.12628e+07	8.83783e+06	4.5556e+06	1.67932e+07	9.45381e+06	1.37531e+06	8.78622e+06	6.93699e+06	1.11505e+07	1.24669e+07	7.40438e+06	2.59081e+07	9.85366e+06	8.9723e+06	1.67178e+07	1.36656e+07	0	5.61812e+06	7.45538e+06	5.72583e+06	9.40945e+06	1.96702e+07	9.36136e+06	5.10418e+06	5.359e+06	7.5044e+06	1.04331e+07
O15014	Zinc finger protein 609	ZNF609	ZNF609	LVEPHSPSPSSK	S578	2xPhospho [S6; S8]	4.67642e+06	1.1051e+07	1.43887e+07	1.08617e+07	1.3015e+07	1.78481e+06	1.08752e+07	1.29611e+07	2.71839e+06	1.53287e+07	1.54773e+07	1.02503e+07	2.67989e+07	9.80468e+06	9.19862e+06	1.37001e+07	1.12628e+07	8.83783e+06	4.5556e+06	1.67932e+07	9.45381e+06	1.37531e+06	8.78622e+06	6.93699e+06	1.11505e+07	1.24669e+07	7.40438e+06	2.59081e+07	9.85366e+06	8.9723e+06	1.67178e+07	1.36656e+07	0	5.61812e+06	7.45538e+06	5.72583e+06	9.40945e+06	1.96702e+07	9.36136e+06	5.10418e+06	5.359e+06	7.5044e+06	1.04331e+07
O15014	Zinc finger protein 609	ZNF609	ZNF609	FCDSPTSDLEMR	S358	1xCarbamidomethyl [C2]; 1xPhospho [S4]	0	6.8126e+06	3.40667e+06	2.91998e+06	5.4661e+06	4.58794e+06	4.35019e+06	3.15667e+06	3.83183e+06	0	4.85368e+06	1.96684e+06	9.78568e+06	0	7.34773e+06	5.12729e+06	3.20933e+06	3.40324e+06	3.00003e+06	6.12353e+06	4.07044e+06	2.25884e+06	6.58194e+06	7.1638e+06	1.90183e+06	7.79115e+06	2.84714e+06	8.57154e+06	3.26121e+06	2.99598e+06	4.18702e+06	4.45063e+06	0	2.62527e+06	0	4.2667e+06	0	2.04388e+06	3.60021e+06	7.32184e+06	9.05089e+06	0	9.45394e+06
O15014	Zinc finger protein 609	ZNF609	ZNF609	APSLTDLVK	S1055	1xPhospho [S3]	0	4.73197e+06	2.73868e+06	6.26335e+06	0	4.18145e+06	9.40828e+06	9.4325e+06	8.82836e+06	0	9.21768e+06	0	0	0	1.0397e+07	0	0	0	0	0	0	0	0	0	0	0	0	1.28773e+07	1.63168e+07	0	0	0	0	0	1.42579e+07	1.14609e+07	6.46201e+06	0	8.40377e+06	0	1.28816e+07	0	1.84544e+07
O15014	Zinc finger protein 609	ZNF609	ZNF609	TNSPAYSDISDAGEDGEGKVDSVK	S842	2xPhospho [S3; S7]	1.39541e+06	0	0	0	0	0	0	0	0	0	0	0	0	0	0	0	0	0	0	1.24088e+06	0	0	0	0	0	728388	0	2.28964e+06	0	0	1.52842e+06	0	0	0	0	0	0	0	0	0	0	0	449217
O15014	Zinc finger protein 609	ZNF609	ZNF609	TNSPAYSDISDAGEDGEGKVDSVK	S846	2xPhospho [S3; S7]	1.39541e+06	0	0	0	0	0	0	0	0	0	0	0	0	0	0	0	0	0	0	1.24088e+06	0	0	0	0	0	728388	0	2.28964e+06	0	0	1.52842e+06	0	0	0	0	0	0	0	0	0	0	0	449217
O15014	Zinc finger protein 609	ZNF609	ZNF609	IYSFTDNAPSPSIGGSSR	S804	1xPhospho [S10]	1.62323e+06	1.8278e+06	2.28505e+06	1.20891e+06	2.67383e+06	1.2452e+06	2.72184e+06	931340	0	515128	3.65358e+06	0	897361	1.22773e+06	721653	516411	55908	0	867729	1.72496e+06	2.65018e+06	1.36857e+06	3.51239e+06	1.05986e+06	1.43922e+06	548145	1.38757e+06	1.03229e+06	0	2.22311e+06	2.18898e+06	1.45141e+06	1.28751e+06	2.16748e+06	2.69226e+06	0	1.07067e+06	2.98639e+06	3.86108e+06	0	0	0	808895
O15014	Zinc finger protein 609	ZNF609	ZNF609	MRPNSNTPVNETATASDSK	T381	1xPhospho [T7]; 1xOxidation [M1]	0	0	2.31855e+06	0	1.43378e+06	1.20838e+06	757544	0	0	0	2.12199e+06	0	1.9892e+06	0	2.48427e+06	0	1.47877e+06	1.84277e+06	0	1.20796e+06	1.44563e+06	2.50487e+06	0	1.62739e+06	0	0	1.37338e+06	3.06683e+06	1.73984e+06	0	1.6752e+06	1.92835e+06	0	1.59971e+06	0	1.00073e+06	0	0	2.22241e+06	0	0	0	1.90005e+06
O15014	Zinc finger protein 609	ZNF609	ZNF609	TNSMGSATGPLPGTK	S467	2xPhospho [S3; S6]; 1xOxidation [M4]	0	0	2.18893e+06	587010	730831	1.38421e+06	0	0	0	2.36025e+06	1.76565e+06	2.71145e+06	1.52167e+06	6.17389e+06	0	0	0	0	0	0	0	0	0	0	0	0	0	1.28932e+06	0	0	0	0	0	3.00693e+06	0	683727	0	0	0	0	0	0	2.1823e+06
O15014	Zinc finger protein 609	ZNF609	ZNF609	TNSMGSATGPLPGTK	S470	2xPhospho [S3; S6]; 1xOxidation [M4]	0	0	2.18893e+06	587010	730831	1.38421e+06	0	0	0	2.36025e+06	1.76565e+06	2.71145e+06	1.52167e+06	6.17389e+06	0	0	0	0	0	0	0	0	0	0	0	0	0	1.28932e+06	0	0	0	0	0	3.00693e+06	0	683727	0	0	0	0	0	0	2.1823e+06
O15014	Zinc finger protein 609	ZNF609	ZNF609	AEEGKSPFRESSGDGMK	S758	1xPhospho [S6]	0	1.66971e+06	0	1.31413e+06	993841	1.9477e+06	1.55802e+06	1.7225e+06	0	0	1.72959e+06	0	1.89296e+06	0	1.55348e+06	0	0	0	0	0	2.44879e+06	0	0	2.14761e+06	0	2.15771e+06	1.94178e+06	4.44408e+06	1.29204e+06	8.20181e+06	4.80388e+06	2.25425e+06	0	3.5612e+06	2.47068e+06	1.68465e+06	903152	5.89081e+06	3.49645e+06	3.90606e+06	2.82399e+06	1.18522e+07	3.21204e+06
O15014	Zinc finger protein 609	ZNF609	ZNF609	AEEGKSPFR	S758	1xPhospho [S6]	6.46752e+06	0	0	0	0	0	0	0	0	0	0	0	0	0	0	0	0	0	0	0	0	0	0	0	0	0	0	720392	0	0	0	0	0	3.48805e+06	3.78713e+06	5.65294e+06	5.6946e+06	8.55959e+06	0	0	0	0	0
O15014	Zinc finger protein 609	ZNF609	ZNF609	AKEPGADPAKSVIIPK	S1077	1xPhospho [S11]	0	0	1.00441e+06	0	0	0	0	0	0	0	591364	0	0	0	0	0	0	0	0	0	0	0	0	0	0	0	0	0	0	0	0	0	0	0	0	676151	0	0	0	0	0	0	539998
O15014	Zinc finger protein 609	ZNF609	ZNF609	AEEGKSPFRESSGDGMK	S758	1xPhospho [S6]; 1xOxidation [M16]	0	0	1.90477e+06	0	0	0	2438502	0	0	3.14347e+06	0	0	0	0	0	0	0	0	0	0	0	0	0	0	0	0	0	0	0	0	0	0	0	0	0	0	0	0	2.8356e+06	0	0	0	0
Q9ULD9	Zinc finger protein 608	ZNF608	ZNF608;DKFZp434M098	SAAAAPGSEASFTESR	S440	1xPhospho [S1]	0	0	4.34641e+06	1.80159e+06	0	2.4406e+06	0	726251	0	2.73364e+06	5.37974e+06	0	0	0	0	0	0	1.22054e+06	1.74835e+06	0	1.13172e+06	1.92292e+06	771369	0	0	0	3.23897e+06	812842	0	1.38561e+06	0	577449	0	0	779809	0	0	0	724033	5.16956e+06	0	0	1.40189e+06
Q9ULD9	Zinc finger protein 608	ZNF608	ZNF608;DKFZp434M098	ARSAAAAPGSEASFTESR	S440	1xPhospho [S3]	2.41339e+07	1.4828e+07	7.15653e+06	5.2059e+06	1.60708e+07	1.88789e+07	1.41651e+07	7.72443e+06	2.12517e+07	2.63688e+07	1.80185e+07	2.52472e+07	4.258e+06	3.59753e+07	4.11277e+06	1.84062e+07	3.20245e+07	1.65763e+07	2.94081e+07	0	9.3596e+06	0	4.08251e+06	6.43477e+06	2.26588e+07	5.17896e+06	1.19654e+07	0	5.74441e+06	2.00591e+07	8.07126e+06	4.71601e+06	2.90674e+07	9.87241e+06	1.21897e+07	7.48808e+06	7.23562e+06	1.24892e+07	0	1.13576e+07	6.05024e+06	5.36233e+06	1.04817e+07
Q9ULD9	Zinc finger protein 608	ZNF608	ZNF608;DKFZp434M098	APASPGAGNPPGTPK	S627	1xPhospho [S4]	3.60454e+06	4.74561e+06	2.76806e+06	5.51077e+06	1.84433e+07	0	3.99816e+06	9.72294e+06	8.9332e+06	1.56309e+07	1.12875e+07	4.17737e+06	5.72805e+06	1.33243e+07	3.40287e+06	1.88353e+07	1.13679e+07	1.04504e+07	1.73006e+07	1.97645e+07	3.27689e+07	3.92272e+06	2.33698e+07	1.83546e+07	1.46966e+07	8.7452e+06	8.54803e+06	1.97444e+07	2.23306e+07	9.90445e+06	9.80747e+06	1.65584e+07	0	1.22772e+07	9.71622e+06	0	9.93961e+06	1.8932e+07	0	1.70735e+07	1.29645e+07	2.264e+07	1.10767e+07
Q9ULD9	Zinc finger protein 608	ZNF608	ZNF608;DKFZp434M098	FCESPTSDLEMR	S421	1xCarbamidomethyl [C2]; 1xPhospho [S4]	0	1.31215e+06	2.2447e+06	0	1.6596e+06	1.67167e+06	1.06757e+06	1.06442e+06	0	0	0	0	0	0	1.65321e+06	1.62029e+06	900195	0	0	1.52404e+06	1.75316e+06	0	2.32775e+06	1.8631e+06	0	2.03462e+06	929173	3.67499e+06	1.20301e+06	0	1.55779e+06	1.51504e+06	0	0	0	1.01721e+06	0	0	0	4.24193e+06	2.56592e+06	4.6482e+06	2.52306e+06
Q9ULD9	Zinc finger protein 608	ZNF608	ZNF608;DKFZp434M098	APASPGAGNPPGTPK	S627	2xPhospho [S4; T13]	0	1.78491e+06	896107	0	0	0	0	904779	0	2.6947e+06	4.87305e+06	0	0	4.37141e+06	807918	0	1.64943e+06	0	1.63735e+06	0	2.59661e+06	0	2.70393e+06	0	0	2.70687e+06	3.23616e+06	4.97968e+06	2.56803e+06	0	2.10595e+06	0	0	0	0	3.11436e+06	0	2.61454e+06	0	5.82227e+06	1.99876e+06	3.10269e+06	2.01641e+06
Q9ULD9	Zinc finger protein 608	ZNF608	ZNF608;DKFZp434M098	APASPGAGNPPGTPK	T636	2xPhospho [S4; T13]	0	1.78491e+06	896107	0	0	0	0	904779	0	2.6947e+06	4.87305e+06	0	0	4.37141e+06	807918	0	1.64943e+06	0	1.63735e+06	0	2.59661e+06	0	2.70393e+06	0	0	2.70687e+06	3.23616e+06	4.97968e+06	2.56803e+06	0	2.10595e+06	0	0	0	0	3.11436e+06	0	2.61454e+06	0	5.82227e+06	1.99876e+06	3.10269e+06	2.01641e+06
Q9ULD9	Zinc finger protein 608	ZNF608	ZNF608;DKFZp434M098	RTPPNCAAEDIK	T481	1xCarbamidomethyl [C6]; 1xPhospho [T2]	0	0	0	0	0	0	0	0	0	0	0	0	7.50401e+06	8.58869e+07	0	0	0	2.31236e+07	0	0	7.72834e+06	0	0	0	0	0	0	0	0	0	7.72542e+06	0	0	0	0	0	0	0	0	0	0	3.70752e+07	6.4645e+06
Q9ULD9	Zinc finger protein 608	ZNF608	ZNF608;DKFZp434M098	DRHSPFGQR	S1453	1xPhospho [S4]	0	0	0	0	1.2305e+06	0	0	0	1.38766e+06	683944	0	5.71159e+06	0	0	0	2.6023e+06	0	1.7551e+06	0	5.24261e+06	6.56577e+06	0	5.34037e+06	1.75401e+07	0	5.2536e+06	0	7.372e+06	3.98674e+06	0	3.60285e+06	5.72103e+06	0	0	399815	0	3.11906e+06	6.86031e+06	0	0	0	0	0
Q9ULD9	Zinc finger protein 608	ZNF608	ZNF608;DKFZp434M098	TPPNCAAEDIK	T481	1xCarbamidomethyl [C5]; 1xPhospho [T1]	4.3493e+06	5.14146e+06	1.0322e+07	4.34856e+06	4.42369e+06	4.91047e+06	0	3.92502e+06	4.43791e+06	0	6.18236e+06	3.51805e+06	7.15845e+06	4.48329e+06	3.15126e+06	5.54663e+06	3.13942e+06	3.75975e+06	4.48107e+06	0	6.88262e+06	0	6.06997e+06	7.66186e+06	0	4.47666e+06	4.01735e+06	4.30149e+06	3.11034e+06	0	6.06384e+06	4.44035e+06	0	5.81337e+06	0	0	0	0	0	0	0	0	0
Q9ULD9	Zinc finger protein 608	ZNF608	ZNF608;DKFZp434M098	NDDRKTPVNWK	T1318	1xPhospho [T6]	0	0	921014	0	0	0	0	0	0	0	1.20628e+06	0	0	0	0	0	0	0	0	0	2.24636e+06	0	0	0	0	0	0	0	0	0	0	0	0	0	0	0	0	0	0	0	0	0	0
H3BQQ2	E3 ubiquitin-protein ligase ZNF598	ZNF598	ZNF598	RNEGVVGGEDYEEVDR	Y251	1xPhospho [Y11]	2.94412e+06	0	1.57186e+06	0	0	0	1.02649e+06	0	0	0	0	0	0	0	1.47918e+06	0	0	0	2.58801e+06	0	0	0	0	0	1.95914e+06	0	0	0	0	0	2.82581e+06	1.55738e+06	0	0	1.11034e+06	0	0	7.41437e+06	1.65899e+06	0	0	0	0
H3BQQ2	E3 ubiquitin-protein ligase ZNF598	ZNF598	ZNF598	DDDFPSLQAIAR	S840	1xPhospho [S6]	0	0	0	0	0	0	0	0	0	0	0	0	0	0	0	0	0	0	0	0	0	0	0	0	0	0	0	403400	0	0	0	0	0	0	0	0	0	0	0	0	0	0	0
Q96LX8	Zinc finger protein 597	ZNF597	ZNF597	SHDEDSERCSDDGDNFFSFSK	S326	1xCarbamidomethyl [C9]; 1xPhospho [S10]	0	0	2.06035e+06	926198	0	0	1.34093e+06	1.77212e+06	0	0	668726	0	0	0	941575	0	0	0	0	0	0	0	0	1.89196e+06	0	2.19587e+06	0	1.30883e+06	0	0	0	0	0	0	1.16346e+06	0	0	0	0	0	0	0	0
Q92610	Zinc finger protein 592	ZNF592	ZNF592	VLHSSNPVPLYAPNLSPPADSR	S573	1xPhospho [S16]	0	0	0	0	0	0	1.41944e+06	833936	0	0	0	0	0	0	0	0	0	0	0	0	0	0	0	0	0	0	0	0	0	0	0	0	0	0	0	1.2558e+06	0	58041.4	1.53847e+06	0	0	0	605628
Q92610	Zinc finger protein 592	ZNF592	ZNF592	ASDSSSPSCSSGPR	S459	1xCarbamidomethyl [C9]; 1xPhospho [S5]	0	0	0	0	0	0	0	0	0	0	0	0	0	0	0	2.27481e+06	1.07694e+06	1.78692e+06	0	0	0	0	876250	0	0	0	0	0	0	0	0	0	0	0	1.04889e+06	0	0	0	0	0	0	0	0
Q8NAF0	Zinc finger protein 579	ZNF579	ZNF579	AAALQALQAQAPTSPPPPPPPLK	S483	1xPhospho [S14]	0	0	1.29288e+06	0	0	0	542044	637691	0	0	0	0	0	0	0	0	0	0	0	0	0	0	0	0	0	0	0	0	0	0	0	0	0	0	0	0	0	0	0	0	0	0	580257
Q9H609	Zinc finger protein 576	ZNF576	ZNF576	SPQSPGGNICHLGAPK	S23	1xCarbamidomethyl [C10]; 1xPhospho [S4]	0	0	0	0	946499	0	0	0	0	0	0	0	0	0	0	0	0	0	0	0	0	0	0	0	0	0	0	1.90027e+06	0	0	0	0	0	0	0	0	0	0	0	0	0	0	0
Q6ZN55	Zinc finger protein 574	ZNF574	ZNF574	MMAPQEAVPAEPSPK	S113	1xPhospho [S13]; 2xOxidation [M1; M2]	0	0	0	1.50258e+06	0	7.69772e+06	0	0	2.0501e+06	0	0	0	0	0	0	0	0	0	0	0	0	0	0	976969	0	0	0	1.15522e+06	0	0	0	0	0	0	1.19497e+06	0	0	0	5.726e+06	0	0	0	0
Q96C55	Zinc finger protein 524	ZNF524	ZNF524	MDTPSPDPLPSPLPGEEEKPLALSPPVPR	S5	1xAcetyl [N-Term]; 1xPhospho [S5]	0	0	0	0	0	0	66184.6	0	109810	0	134598	0	0	0	0	235338	0	0	0	0	106930	0	131039	0	0	0	0	45863.1	29697.9	0	119348	0	0	210419	0	75399.6	63107.2	0	66994.3	0	0	0	0
J3KTI4	Zinc finger protein 521	ZNF521	ZNF521	HIAECHPECSPNEDR	S53	2xCarbamidomethyl [C5; C9]; 1xPhospho [S10]	6.5851e+06	0	3.41783e+06	3.2452e+06	0	0	761746	0	0	0	1.58968e+06	0	0	0	7.00978e+06	8.60167e+06	0	0	4.84291e+06	7.38487e+06	0	2.78521e+06	9.06971e+06	8.04769e+06	0	3.70362e+06	0	0	0	3.75938e+06	0	2.55161e+06	0	3.1117e+06	4.81225e+06	0	0	0	6.04821e+06	1.0411e+07	0	0	7.79469e+06
J3KTI4	Zinc finger protein 521	ZNF521	ZNF521	FGSPVLGTPK	S326	1xPhospho [S3]	1.16861e+06	0	544479	766803	1.79992e+06	0	1.94788e+06	2.40563e+06	0	0	938426	1.87001e+06	0	0	1.85773e+06	2.64734e+06	2.39072e+06	1.07595e+06	2.40627e+06	3.25522e+06	1.78668e+06	0	1.54998e+06	1.77285e+06	4.48892e+06	0	1.5138e+06	1.00145e+06	2.39546e+06	2.89293e+06	0	1.57584e+06	0	2.76697e+06	4.37253e+06	841326	824292	2.49705e+06	1.56346e+06	0	2.60297e+06	0	641286
J3KTI4	Zinc finger protein 521	ZNF521	ZNF521	TPQVSPMPR	S959	1xPhospho [S5]; 1xOxidation [M7]	813493	0	0	0	0	1.18422e+06	0	0	0	0	0	0	0	0	1.09959e+06	0	665144	569770	2.29763e+06	1.22088e+06	0	0	863944	0	645344	0	0	461246	0	0	616979	0	0	0	1.04505e+06	3.1361e+06	776942	2.06895e+06	0	0	0	0	0
Q6AHZ1	Zinc finger protein 518A	ZNF518A	ZNF518A	RFSGTAVYENPQR	S655	1xPhospho [S3]	0	1.85589e+06	3.20605e+06	0	0	2.86446e+06	3.72775e+06	4.53174e+06	3.47067e+06	4.24784e+06	5.86696e+06	0	7.7813e+06	0	3.30424e+06	4.47338e+06	3.05222e+06	2.91762e+06	0	6.95868e+06	4.18247e+06	0	0	2.88511e+06	3.44726e+06	0	7.14797e+06	1.09137e+07	4.98328e+06	3.7892e+06	2.87829e+06	2.34807e+06	0	0	5.01932e+06	3.93004e+06	8.70866e+06	3.95852e+06	0	0	9.79841e+06	0	0
Q92618	Zinc finger protein 516	ZNF516	ZNF516	SATPTPTVIAR	T930	1xPhospho [T3]	4.72004e+06	5.46272e+06	8.93582e+06	2.9519e+06	5.29224e+06	1.59036e+06	4.27503e+06	6.20045e+06	1.71679e+06	7.37449e+06	6.46824e+06	4.45208e+06	7.73358e+06	8.36114e+06	7.51713e+06	3.72869e+06	7.70953e+06	3.96352e+06	3.23861e+06	8.94932e+06	6.53074e+06	4.71435e+06	2.84817e+06	3.94081e+06	3.33577e+06	5.1653e+06	5.43964e+06	8.70593e+06	3.36628e+06	2.62854e+06	5.50097e+06	4.27661e+06	7.58047e+06	6.21051e+06	3.24176e+06	5.74878e+06	7.49766e+06	6.719e+06	1.59545e+07	4.63125e+06	5.67483e+06	6.8417e+06	4.56801e+06
Q92618	Zinc finger protein 516	ZNF516	ZNF516	SGSSPLGVVTK	S852	1xPhospho [S4]	0	4.52726e+06	0	4.43539e+06	4.63982e+06	6.34054e+06	3.97644e+06	2.8093e+06	2.46788e+06	2.49003e+06	2.6855e+06	2.81972e+06	2.29132e+06	0	5.32688e+06	1.23596e+07	2.43614e+06	0	7.33491e+06	0	1.92521e+06	5.76959e+06	1.23675e+06	2.45671e+06	1.08727e+06	3.71638e+06	1.35982e+06	2.40725e+06	4.55755e+06	2.15518e+06	2.15215e+06	1.1099e+06	0	3.26293e+06	1.95002e+06	3.24895e+07	6.10127e+06	2.91421e+06	9.21433e+06	0	0	0	675996
Q8N8E2	Zinc finger protein 513	ZNF513	ZNF513	DSEGDSLGARPGLPYGLSDDESGGGR	S85	1xPhospho [S18]	0	1.29553e+06	0	0	0	2.17675e+06	0	0	0	851910	0	0	0	0	0	200950	145311	2.17137e+06	0	0	0	0	1.94307e+06	2.2094e+06	1.81605e+06	0	2.02978e+06	1.09666e+06	1.84523e+06	335488	1.35608e+06	0	0	0	0	0	1.36466e+06	0	0	0	0	0	980270
Q8N8E2	Zinc finger protein 513	ZNF513	ZNF513	ALSAESEVEEPAR	S96	1xPhospho [S3]	0	944955	0	1.32723e+06	1.29041e+06	0	1.24125e+06	1.78306e+06	1.60012e+06	1.90698e+06	1.29131e+06	0	1.12997e+06	2.46408e+06	0	1.49572e+06	0	3.59442e+06	1.48986e+06	584654	1.31502e+06	0	2.00065e+06	1.74587e+06	480672	0	1.74634e+06	0	0	2.21808e+06	0	1.30678e+06	2.69579e+06	1.33075e+06	0	2.10685e+06	0	0	938091	1.73505e+06	0	0	2.71332e+06
Q96KM6	Zinc finger protein 512B	ZNF512B	ZNF512B	RTSAQVAVFHLQEIAEDELAR	S686	1xPhospho [S3]	154711	0	0	150081	0	110930	0	0	0	0	52280.1	0	0	0	143897	0	221529	128848	0	0	0	0	77506.7	0	0	68929.5	67133	0	0	94503.4	0	67490.7	0	211221	0	0	0	176883	0	0	0	0	0
Q96KM6	Zinc finger protein 512B	ZNF512B	ZNF512B	TSAQVAVFHLQEIAEDELAR	T685	1xPhospho [T1]	0	0	426031	0	0	0	0	0	0	0	0	0	0	0	0	0	0	0	0	0	0	0	0	0	0	0	0	35283.6	0	0	0	0	0	0	0	0	0	0	0	0	0	0	0
Q96KM6	Zinc finger protein 512B	ZNF512B	ZNF512B	AAGPASPPEEDPER	S409	1xPhospho [S6]	0	1.21105e+07	2.13996e+07	1.65973e+07	2.05239e+07	1.38343e+07	1.21934e+07	2.32443e+07	6.85545e+06	1.67354e+07	2.60013e+07	6.66256e+06	1.54678e+07	9.12939e+06	1.85176e+07	1.84415e+07	8.51131e+06	1.0183e+07	10371641	3.42032e+07	8.76413e+06	1.15416e+07	4.52434e+07	2.25939e+07	1.33391e+07	1.21094e+07	2.76269e+07	3.51662e+07	1.58814e+07	4.93122e+07	3.96094e+07	2.30931e+07	0	1.03628e+07	1.22572e+07	4.11549e+06	2.56038e+07	2.88804e+07	1.44725e+07	3.94372e+07	3.05565e+07	3.1628e+07	3.13498e+07
Q96KM6	Zinc finger protein 512B	ZNF512B	ZNF512B	ERTPEEPVAK	T852	1xPhospho [T3]	0	0	0	0	1.78049e+06	0	0	0	0	0	2.04124e+06	0	4.45555e+06	0	0	0	0	0	0	3.21475e+06	2.59701e+06	0	3.67296e+06	5.9211e+06	0	0	2.97474e+06	6.29184e+06	2.06418e+06	0	0	0	0	0	2.27848e+06	0	0	3.87533e+06	0	0	0	0	1.79652e+06
Q96ME7	Zinc finger protein 512	ZNF512	ZNF512;DKFZp666L156	QQPGIELPETELSLR	S520	1xPhospho [S13]	0	0	659285	0	0	267324	0	81252.6	0	0	0	0	0	0	0	0	0	0	0	0	0	0	0	0	0	0	0	0	0	0	0	0	0	0	0	0	0	225789	0	0	0	0	0
Q8NB15	Zinc finger protein 511	ZNF511	ZNF511;ZNF511-PRAP1	SPASAEAPGDSGERSEGEAMEICSEPVAASPAPAGER	S199	1xCarbamidomethyl [C23]; 1xPhospho [S15]	0	0	0	0	0	0	0	0	0	0	0	0	0	0	0	0	0	0	0	0	0	0	0	0	0	0	0	0	0	0	0	0	0	0	0	0	0	0	0	0	0	0	1.69323e+06
Q8NB15	Zinc finger protein 511	ZNF511	ZNF511;ZNF511-PRAP1	SPASAEAPGDSGER	S185	1xPhospho [S1]	0	0	0	0	891840	2.21702e+06	0	0	0	0	944058	0	0	0	0	2.2094e+06	3.65399e+06	3.82213e+06	3.8849e+06	1.38301e+06	0	0	1.20388e+06	1.66916e+06	0	0	1.20352e+06	3.64127e+06	0	0	0	1.31765e+06	8.2408e+06	0	0	0	0	2.00297e+06	0	0	0	0	0
B9EGE7	ZNF507 protein	ZNF507	ZNF507	LPSAEETLSQK	S404	1xPhospho [S3]	0	0	0	0	1.61782e+06	0	1.18635e+06	877930	0	3.08091e+06	2.44522e+06	0	1.76227e+06	0	0	0	0	0	0	3.13593e+06	2.4222e+06	0	2.077e+06	3.6212e+06	1.51612e+06	3.30042e+06	5.39175e+06	1.91476e+06	0	0	0	0	0	1.54303e+06	0	3.24012e+06	2.3921e+06	0	0	3.60863e+06	2.34512e+06	4.28814e+06	1.60935e+06
B9EGE7	ZNF507 protein	ZNF507	ZNF507	AQQCVSPSSSLCR	S195	2xCarbamidomethyl [C4; C12]; 1xPhospho [S6]	1.9155e+06	3.17985e+06	2.88777e+06	4.60773e+06	4.04502e+06	1.38297e+07	2.5393e+06	2.0906e+06	3.37269e+06	2.35869e+06	6.72874e+06	0	6.90471e+06	0	1.19145e+06	3.24793e+06	3.10473e+06	1.48389e+06	3.26855e+06	2.54794e+06	3.18896e+06	1.93814e+06	0	3.65029e+06	0	1.98024e+06	723611	6.55907e+06	0	0	2.48912e+06	1.34542e+06	0	0	2.46326e+06	1.46291e+07	0	0	1.27001e+06	2.95863e+06	4.58665e+06	5.47386e+06	4.23216e+06
Q96F45	Zinc finger protein 503	ZNF503	ZNF503	TGHILHPEYLQPLPSTPVSPIELDAK	S98	2xPhospho [S15; S19]	0	0	500554	0	0	0	0	39408.1	0	0	0	0	0	0	139205	0	0	0	178343	0	110279	233521	0	0	0	0	227550	0	0	0	125915	0	0	0	0	73142.4	0	96188.2	125633	0	0	0	0
Q96F45	Zinc finger protein 503	ZNF503	ZNF503	TGHILHPEYLQPLPSTPVSPIELDAK	S102	2xPhospho [S15; S19]	0	0	500554	0	0	0	0	39408.1	0	0	0	0	0	0	139205	0	0	0	178343	0	110279	233521	0	0	0	0	227550	0	0	0	125915	0	0	0	0	73142.4	0	96188.2	125633	0	0	0	0
Q96F45	Zinc finger protein 503	ZNF503	ZNF503	TGHILHPEYLQPLPSTPVSPIELDAK	S102	1xPhospho [S19]	810456	1.20929e+06	7.88794e+06	639590	82291.7	1.25662e+06	600400	55691.3	0	0	0	0	78459	0	125780	456598	0	180671	155898	0	470535	0	452980	58621.9	186417	4.85449e+06	724181	1.21685e+06	90134.4	198207	175679	185598	223653	678321	181108	355885	429886	799370	1.50256e+06	0	0	0	0
Q96F45	Zinc finger protein 503	ZNF503	ZNF503	VPSATCQPFTPR	T223	1xCarbamidomethyl [C6]; 1xPhospho [T10]	0	0	0	0	0	0	0	0	0	0	0	3.27805e+06	0	3.23779e+06	0	0	0	0	0	0	0	0	0	0	0	0	0	0	1.05141e+06	0	507743	0	0	1.19603e+06	0	1.83822e+06	0	0	0	0	2.14866e+06	0	0
H3BS19	Zinc finger protein 469	ZNF469	ZNF469	AVGSLAPGELAR	S3705	1xPhospho [S4]	7.54136e+06	1.66933e+07	1.04391e+07	1.85151e+07	7.24478e+06	8.0862e+06	6.4463e+06	5.04353e+06	1.86237e+06	1.63146e+07	1.07792e+07	8.53743e+06	4.78864e+06	3.61024e+07	2.04294e+07	1.37028e+07	1.51804e+07	8.19274e+06	1.99607e+07	2.48867e+06	8.9172e+06	1.22884e+06	9.42862e+06	7.9554e+06	1.00467e+07	1.26301e+07	8.77203e+06	3.7415e+06	9.81882e+06	2.59111e+07	1.66402e+07	5.29247e+06	2.79383e+07	9.30456e+06	1.35221e+07	1.69538e+07	5.59106e+06	6.45738e+06	7.93707e+06	4.87804e+06	9.62477e+06	1.04616e+07	5.82883e+06
Q96JM2	Zinc finger protein 462	ZNF462	ZNF462;DKFZp686L2367;DKFZp686B2325	DAVEKPILSSEELAGPVNCENSIPTPFPEQEAECPEDARLSPEK	S1451	2xCarbamidomethyl [C19; C34]; 1xPhospho [S41]	676355	0	239513	0	1.04492e+06	418415	894944	448713	0	1.54424e+06	378138	222583	895088	0	0	363629	235046	0	0	0	0	0	0	354593	0	206516	399498	1.0034e+06	275923	335914	847028	285667	1.38023e+06	694824	470355	194820	98330.4	0	486187	148264	0	0	721447
Q96JM2	Zinc finger protein 462	ZNF462	ZNF462;DKFZp686L2367;DKFZp686B2325	VSPVPLSGAAAGTEQK	S2172	1xPhospho [S2]	0	0	0	0	0	1.35439e+06	0	0	0	0	0	0	6.32615e+06	0	0	1.91224e+06	2.21627e+06	2.27126e+06	0	4.67791e+06	4.63848e+06	1.01775e+06	2.97226e+06	4.68825e+06	1.63946e+06	1.9517e+06	2.94152e+06	5.51958e+06	2.11639e+06	3.02205e+06	3.11247e+06	0	0	0	2.35426e+06	1.25933e+06	2.86573e+06	0	0	0	7.43055e+06	0	3.29074e+06
Q96JM2	Zinc finger protein 462	ZNF462	ZNF462;DKFZp686L2367;DKFZp686B2325	SPHNSGLVNLTER	S350	1xPhospho [S1]	4.50856e+06	0	5.8166e+06	1.5953e+06	2.70069e+06	5.26326e+06	3.17133e+06	3.06777e+06	2.07889e+06	1.83301e+06	4.68645e+06	2.43549e+06	8.81667e+06	2.15361e+06	2.0218e+06	2.49186e+06	2.7572e+06	1.25527e+06	1.67505e+06	4.00583e+06	3.92068e+06	0	2.03517e+06	5.31175e+06	3.29394e+06	2.18824e+06	3.49329e+06	5.40598e+06	3.15273e+06	1.72729e+06	4.0748e+06	2.88424e+06	0	0	609326	4.2676e+06	4.4922e+06	4.42053e+06	2.72017e+06	0	3.72985e+06	0	3.55771e+06
Q96JM2	Zinc finger protein 462	ZNF462	ZNF462;DKFZp686L2367;DKFZp686B2325	NNSRVSPVPLSGAAAGTEQK	S2169	2xPhospho [S3; S6]	0	0	2.98815e+06	0	784359	0	0	636601	0	0	1.98817e+06	0	0	0	770502	0	0	0	0	1.71477e+06	1.22614e+06	0	926654	0	0	793362	1.46938e+06	0	0	0	1.15443e+06	0	0	0	0	0	602973	0	868849	0	0	0	825804
Q96JM2	Zinc finger protein 462	ZNF462	ZNF462;DKFZp686L2367;DKFZp686B2325	NNSRVSPVPLSGAAAGTEQK	S2172	2xPhospho [S3; S6]	0	0	2.98815e+06	0	784359	0	0	636601	0	0	1.98817e+06	0	0	0	770502	0	0	0	0	1.71477e+06	1.22614e+06	0	926654	0	0	793362	1.46938e+06	0	0	0	1.15443e+06	0	0	0	0	0	602973	0	868849	0	0	0	825804
E9PH99	E3 SUMO-protein ligase ZNF451	ZNF451	ZNF451	ESSSLECIAIPK	S436	1xCarbamidomethyl [C7]; 1xPhospho [S2]	0	0	0	0	0	1.64463e+06	628318	0	0	0	0	0	0	0	2.64243e+06	0	0	1.03562e+06	0	1.56283e+06	0	0	1.19734e+06	0	509321	1.80655e+06	1.17671e+06	0	1.15191e+06	0	959201	621066	0	0	0	0	706278	0	0	0	0	0	1.00432e+06
A0A024R4T0	Zinc finger protein 447, isoform CRA_a	ZNF447	ZSCAN18;ZNF447;DKFZp586B1122;FLJ00320	AFASPRSSPAPPDLPTPGSAAGVQQEEPETIPER	S13	2xPhospho [S/T]	1.22335e+06	2.09885e+06	0	0	267899	660848	8.00684e+06	5.32717e+06	0	458341	2.39509e+06	64634.3	388278	274127	2.4292e+06	542250	323319	0	391877	1.01623e+06	744894	621496	1.08207e+06	999143	978945	755728	970499	9.06988e+06	9.2114e+06	845284	1.87586e+06	1.5616e+06	1.39735e+06	380423	0	999729	6.29113e+06	388362	6.3268e+06	136457	167021	0	0
A0A024R4T0	Zinc finger protein 447, isoform CRA_a	ZNF447	ZSCAN18;ZNF447;DKFZp586B1122;FLJ00320	AGGPPESVEGEAPPAPPEAQR	S496	1xPhospho [S7]	2.17048e+06	0	5.17498e+06	623032	0	0	3.42197e+06	3.14603e+06	4.0318e+06	0	4.78852e+06	0	0	0	1.20652e+06	0	0	1.33397e+06	0	3.14407e+06	1.36648e+06	0	0	0	1.16551e+06	9.04331e+06	7.36923e+06	0	903520	2.74378e+06	0	501422	0	0	0	1.02017e+07	0	0	1.89658e+06	2.36982e+06	2.52899e+06	0	3.31062e+06
Q9NWS9	Zinc finger protein 446	ZNF446	ZNF446;DKFZp434L2027;DKFZp434K202	EEPNVDGQEVAPSSPPLAAQSPEGNHGHQEPASTSFHPPR	S181	2xPhospho [S14; S21]	0	0	8.77699e+06	0	1.09677e+06	0	1.37422e+06	1.51696e+06	0	0	1.08649e+06	1.99724e+06	4.3724e+07	0	0	0	0	2.89614e+06	0	0	1.97467e+06	0	1.68982e+06	0	4.71241e+06	1.18502e+07	0	2.46088e+07	0	0	0	0	531903	1.77367e+07	1.63521e+06	3.42778e+06	1.3422e+06	4.16878e+06	0	0	11237366	0	0
Q9NWS9	Zinc finger protein 446	ZNF446	ZNF446;DKFZp434L2027;DKFZp434K202	EEPNVDGQEVAPSSPPLAAQSPEGNHGHQEPASTSFHPPR	S188	2xPhospho [S14; S21]	0	0	8.77699e+06	0	1.09677e+06	0	1.37422e+06	1.51696e+06	0	0	1.08649e+06	1.99724e+06	4.3724e+07	0	0	0	0	2.89614e+06	0	0	1.97467e+06	0	1.68982e+06	0	4.71241e+06	1.18502e+07	0	2.46088e+07	0	0	0	0	531903	1.77367e+07	1.63521e+06	3.42778e+06	1.3422e+06	4.16878e+06	0	0	11237366	0	0
A0A024R4T7	Zinc finger protein 446, isoform CRA_a	ZNF446	ZNF446;DKFZp434L2027;DKFZp434K202	TEEPLGSPHPSGTVESPGEGPQDTR	S141	2xPhospho [S11; S]	1.67536e+07	9.69345e+06	1.79685e+07	1.47648e+07	1.30651e+07	1.40118e+06	1.34915e+07	1.02418e+07	6.78372e+06	1.25065e+07	1.8287e+07	1.26785e+06	2.27489e+07	0	6.36479e+06	1.69859e+07	7.42347e+06	8.06618e+06	4.32564e+06	1.33888e+07	4.32151e+06	9.04309e+06	1.69332e+07	13233007	9.83097e+06	2.03404e+07	1.28623e+07	1.69598e+07	7.75963e+06	1.20159e+07	1.42297e+07	1.18597e+07	0	7.89649e+07	3.66727e+06	1.02315e+07	1.92887e+07	1.39286e+07	7.97116e+06	2.555e+07	5.15537e+07	4.94009e+07	3.12649e+07
A0A024R4T7	Zinc finger protein 446, isoform CRA_a	ZNF446	ZNF446;DKFZp434L2027;DKFZp434K202	EEPNVDGQEVAPSSPPLAAQSPEGHHGHQEPASTSFHPPR	S181	2xPhospho [S14; S21]	4.08705e+06	9.69433e+06	0	4.48348e+06	1.04447e+07	2.72946e+06	8.10599e+06	0	2.01037e+06	0	7.483e+06	1.17309e+07	3.06709e+06	0	0	0	0	0	5.10372e+06	5.05124e+06	1.44165e+07	4.07188e+06	0	6.15444e+06	3.78033e+06	5.17351e+06	0	2.96422e+06	1.65242e+07	0	4.07878e+06	0	0	0	0	0	3.71632e+06	0	4.63116e+06	5.02628e+06	0	1.23039e+07	3.37563e+06
A0A024R4T7	Zinc finger protein 446, isoform CRA_a	ZNF446	ZNF446;DKFZp434L2027;DKFZp434K202	EEPNVDGQEVAPSSPPLAAQSPEGHHGHQEPASTSFHPPR	S188	2xPhospho [S14; S21]	4.08705e+06	9.69433e+06	0	4.48348e+06	1.04447e+07	2.72946e+06	8.10599e+06	0	2.01037e+06	0	7.483e+06	1.17309e+07	3.06709e+06	0	0	0	0	0	5.10372e+06	5.05124e+06	1.44165e+07	4.07188e+06	0	6.15444e+06	3.78033e+06	5.17351e+06	0	2.96422e+06	1.65242e+07	0	4.07878e+06	0	0	0	0	0	3.71632e+06	0	4.63116e+06	5.02628e+06	0	1.23039e+07	3.37563e+06
Q9NWS9	Zinc finger protein 446	ZNF446	ZNF446;DKFZp434L2027;DKFZp434K202	EEPNVDGQEVAPSSPPLAAQSPEGNHGHQEPASTSFHPPR	S181	1xPhospho [S14]	0	0	0	0	0	0	0	0	0	0	0	0	0	0	0	0	0	0	0	0	0	0	0	0	0	0	0	2.84957e+06	0	0	0	0	0	0	0	0	0	0	0	0	0	0	0
Q9C0G0	Zinc finger protein 407	ZNF407	ZNF407	NAGSAVTMSDEHANKPAESPTSVLEKPDR	S952	1xPhospho [S19]; 1xOxidation [M8]	0	0	3.6636e+06	0	0	0	0	0	0	1.59392e+06	0	0	0	0	0	0	0	0	0	0	0	0	0	1.35406e+06	2.47611e+06	0	0	0	3.19044e+06	0	1.38622e+06	0	0	0	0	0	2.56631e+06	0	3.22026e+06	3.30436e+06	0	0	1.57016e+06
Q9C0G0	Zinc finger protein 407	ZNF407	ZNF407	SAESPVLVVTR	S1262	1xPhospho [S4]	0	2.01848e+06	1.97549e+06	2.25839e+06	2.53885e+06	0	1.93554e+06	2.39565e+06	0	0	1.86026e+06	2.82158e+06	3.03593e+06	0	3.94853e+06	2.2345e+06	1.84988e+06	1.45699e+06	2.42764e+06	3.99732e+06	2.10631e+06	0	1.82635e+06	1.72606e+06	2.50302e+06	1.6859e+06	1.62873e+06	2.95107e+06	1.42376e+06	1.3017e+06	2.56921e+06	2.26507e+06	0	0	1.95031e+06	1.42615e+06	4.65244e+06	5.32164e+06	0	3.9798e+06	4.11719e+06	3.1359e+06	2.41051e+06
Q8NF99	Zinc finger protein 397	ZNF397	ZNF397	EFDDPGQQVPASPQGPAVPWK	S142	1xPhospho [S12]	1.59375e+06	2.15788e+06	3.52132e+06	1.76966e+06	319365	0	4.02486e+06	4.31664e+06	0	956568	188995	0	0	1.24563e+06	2.11971e+06	934473	460802	396042	0	0	166744	2.26039e+06	498694	117956	0	0	0	5.60666e+06	9.56017e+06	0	492204	160171	0	0	2.44765e+06	0	752619	502483	3.12771e+06	0	216285	0	503266
Q8NF99	Zinc finger protein 397	ZNF397	ZNF397	SWKPCLSPKSDCENSETATK	S182	2xCarbamidomethyl [C5; C12]; 2xPhospho [S7; S10]	0	0	0	0	0	0	3.10327e+06	2.52634e+06	0	0	2.18449e+06	0	0	0	0	0	0	0	0	637318	0	0	0	0	0	1.63071e+06	0	2.11597e+06	0	0	1.34328e+06	0	0	0	0	0	0	0	0	4.08392e+06	4.10274e+06	0	3.50297e+06
Q8NF99	Zinc finger protein 397	ZNF397	ZNF397	SWKPCLSPKSDCENSETATK	S185	2xCarbamidomethyl [C5; C12]; 2xPhospho [S7; S10]	0	0	0	0	0	0	3.10327e+06	2.52634e+06	0	0	2.18449e+06	0	0	0	0	0	0	0	0	637318	0	0	0	0	0	1.63071e+06	0	2.11597e+06	0	0	1.34328e+06	0	0	0	0	0	0	0	0	4.08392e+06	4.10274e+06	0	3.50297e+06
Q8NF99	Zinc finger protein 397	ZNF397	ZNF397	SWKPCLSPK	S182	1xCarbamidomethyl [C5]; 1xPhospho [S7]	0	0	0	0	0	0	1.5277e+06	0	0	0	1.94305e+06	0	3.60818e+06	0	1.45958e+06	0	0	0	1.61879e+06	617139	916035	0	0	2.65984e+06	0	0	862119	3.39431e+06	1.64484e+06	0	0	0	0	0	0	0	0	1.53756e+06	3.64486e+06	2.95194e+06	0	0	1.51771e+06
Q9H8N7	Zinc finger protein 395	ZNF395	ZNF395	SLSFSEPQQPAPAMK	S449	1xPhospho [S3]	1.42554e+07	9.6249e+06	2.14827e+07	3.64045e+06	1.86741e+07	3.27243e+07	1.83491e+07	1.38827e+07	2.05039e+07	0	6.358e+06	5.62791e+07	1.86623e+06	0	5.39657e+06	1.94569e+07	2.87599e+06	7.42221e+06	1.0561e+07	2.91799e+06	5.84186e+06	6.43894e+06	2.49429e+06	2.75563e+06	4.86246e+06	1.0166e+06	6.02552e+06	8.14607e+06	1.14767e+07	6.34279e+06	3.12882e+06	1.39869e+06	0	1.37965e+07	1.68346e+06	9.14243e+06	2.11015e+06	1.26868e+07	1.51502e+07	0	0	0	1.13022e+06
Q9H8N7	Zinc finger protein 395	ZNF395	ZNF395	AQSSGPEHPGPESSLPSGALSK	S376	1xPhospho [S3]	0	902317	4.59955e+06	3.34047e+06	1.22262e+06	6.15533e+06	4.08638e+06	1.15286e+06	1.1827e+06	2.06742e+06	2.09605e+07	1.74189e+06	1.88574e+06	0	1.85433e+06	4.16146e+06	8.14339e+06	1.87194e+06	0	0	832924	0	779858	1.13141e+06	2.9084e+06	606975	5.98231e+06	2.66248e+06	2.2873e+07	9.64301e+06	0	7.69259e+06	0	0	3.57092e+06	2.101e+07	1.52417e+07	0	2.85152e+07	0	0	0	0
Q9H8N7	Zinc finger protein 395	ZNF395	ZNF395	SLSFSEPQQPAPAMK	S449	1xPhospho [S3]; 1xOxidation [M14]	0	0	2.08993e+06	0	0	1.89539e+06	1.50272e+06	2.52794e+06	0	0	1.08746e+06	0	0	0	0	0	0	0	0	0	0	0	732368	0	0	0	0	2.36945e+06	921520	0	0	1.34871e+06	0	0	2.03285e+06	9.76927e+06	2.43061e+06	2.13586e+06	3.41887e+06	0	0	0	0
C9J6X6	Zinc finger protein 385C	ZNF385C	ZNF385C	RPLSPPPPAEK	S6	1xPhospho [S4]	0	0	0	0	0	0	0	0	0	0	0	0	0	0	0	0	0	0	0	0	0	0	0	0	0	0	0	0	0	0	0	0	0	0	0	0	0	0	0	0	0	0	0
A0A2U3TZT0	Zinc finger protein 385B	ZNF385B	ZNF385B;FLJ25270	LQRSPSILAAK	S409	1xPhospho [S4]	0	0	3.66976e+06	0	0	6.77993e+06	0	0	0	0	0	0	0	0	0	0	0	0	0	0	0	0	0	0	0	0	0	0	0	0	0	0	0	0	0	929379	1.29822e+06	0	1.69055e+06	0	0	0	0
Q96PM9	Zinc finger protein 385A	ZNF385A	ZNF385A;ZNF385	QPGSPSPPSIPETGQGVTK	S160	1xPhospho [S4]	0	0	0	0	0	0	0	989056	0	0	913529	0	0	0	0	0	1.32739e+06	0	0	0	0	0	0	0	1.55145e+06	0	944952	8.49111e+06	1.26597e+06	0	0	0	0	0	0	0	648733	1.33665e+06	0	0	0	0	1.30457e+06
Q96PM9	Zinc finger protein 385A	ZNF385A	ZNF385A;ZNF385	LGPPTPGEPEAPAQDR	T248	1xPhospho [T5]	4.76815e+06	0	0	1.00774e+06	0	0	1.22157e+06	0	0	0	0	0	0	0	0	0	0	888009	0	0	0	0	0	0	1.17288e+06	0	3.23901e+06	4.78897e+06	0	0	1.45627e+06	0	0	1.15838e+06	0	0	0	0	0	0	0	0	0
Q96PM9	Zinc finger protein 385A	ZNF385A	ZNF385A;ZNF385	GEGGTPAPASLPGGSKEEEEK	S185	1xPhospho [S10]	0	0	0	0	2.66457e+06	0	0	0	0	0	0	0	0	0	0	0	0	0	0	0	0	0	0	0	0	0	0	0	0	0	0	0	0	0	1.24026e+06	0	0	0	0	0	0	0	0
D3DUR9	Zinc finger protein 384, isoform CRA_a	ZNF384	ZNF384	MLESGLPEMNDPYVLSPEDDDDHQKDGK	S214	1xPhospho [S16]; 2xOxidation [M1; M9]	0	0	2.48666e+06	0	0	0	0	0	0	236324	0	0	0	0	0	3.80495e+06	0	0	0	1.27257e+06	0	0	1.12483e+06	0	0	810505	0	770165	0	0	2.92472e+06	0	0	0	0	0	0	0	0	0	0	0	0
D3DUR9	Zinc finger protein 384, isoform CRA_a	ZNF384	ZNF384	VASTLTEEGGGGGGGGGSVAPKPPR	S185	1xPhospho [S18]	0	0	0	0	0	0	0	0	0	0	0	0	0	0	0	0	0	0	0	0	0	0	0	0	0	0	0	0	0	0	0	0	0	0	0	0	0	0	0	0	0	0	0
D3DUR9	Zinc finger protein 384, isoform CRA_a	ZNF384	ZNF384	MLESGLPEMNDPYVLSPEDDDDHQKDGK	S214	1xPhospho [S16]; 1xOxidation [M1]	0	0	0	0	809574	0	0	0	0	878138	0	0	0	251706	1.41348e+06	238030	93932.7	0	473654	0	37379.6	0	0	0	83003	143737	0	0	0	0	122119	0	0	0	0	0	0	0	0	0	0	0	0
D3DUR9	Zinc finger protein 384, isoform CRA_a	ZNF384	ZNF384	MLESGLPEMNDPYVLSPEDDDDHQKDGK	S214	1xPhospho [S16]	0	0	0	0	0	0	0	1.79263e+06	8.07003e+06	379073	0	102558	83646.7	255111	1.58274e+06	0	0	0	0	0	188428	0	0	0	251434	112272	0	0	0	0	0	0	0	0	0	748811	1.15406e+06	0	0	140360	0	0	0
D3DUR9	Zinc finger protein 384, isoform CRA_a	ZNF384	ZNF384	MCSLTFYSK	S234	1xCarbamidomethyl [C2]; 1xPhospho [S3]	0	0	0	0	0	0	0	0	0	0	0	0	0	0	0	0	0	0	0	0	0	0	0	0	0	0	0	569498	0	0	0	0	0	0	0	0	0	0	0	0	0	0	0
Q7RTV3	Zinc finger protein 367	ZNF367	ZNF367	ADQEQQDPLEYLQSDEEDDEKR	S310	1xPhospho [S14]	655392	572944	0	0	0	0	0	0	0	0	0	0	0	0	0	0	0	0	0	0	0	0	0	0	0	0	0	7.68934e+06	0	0	1.35839e+06	535053	0	474157	0	0	1.28127e+06	0	0	1.80716e+06	0	0	0
Q5T0B9	Zinc finger protein 362	ZNF362	ZNF362	HTVVEHLVSHHSPQRTESPGIPVR	S404	2xPhospho [S12; S18]	0	0	7.19209e+06	0	1.61785e+06	2.18125e+06	1.45005e+06	0	0	0	0	0	0	0	0	831143	0	0	0	0	1.77987e+06	0	0	0	0	0	1.27103e+06	0	0	0	0	0	0	0	705380	0	1.66161e+06	0	6.33514e+06	0	2.12639e+06	0	0
Q5T0B9	Zinc finger protein 362	ZNF362	ZNF362	HTVVEHLVSHHSPQRTESPGIPVR	S410	2xPhospho [S12; S18]	0	0	7.19209e+06	0	1.61785e+06	2.18125e+06	1.45005e+06	0	0	0	0	0	0	0	0	831143	0	0	0	0	1.77987e+06	0	0	0	0	0	1.27103e+06	0	0	0	0	0	0	0	705380	0	1.66161e+06	0	6.33514e+06	0	2.12639e+06	0	0
Q5T0B9	Zinc finger protein 362	ZNF362	ZNF362	TESPGIPVR	S410	1xPhospho [S3]	1.24296e+07	7.97919e+06	2.00963e+07	6.50295e+06	1.25514e+07	1.02645e+07	8.30342e+06	9.77345e+06	3.2607e+06	7.13499e+06	9.69662e+06	5.33193e+06	1.06754e+07	1.54703e+07	7.92255e+06	1.27236e+07	9.01517e+06	7.95506e+06	5.52703e+06	1.76854e+07	1.46125e+07	0	1.54433e+07	2.26146e+07	1.08772e+07	0	1.0135e+07	1.3595e+07	0	0	9.32265e+06	1.13629e+07	1.17775e+07	1.19776e+07	3.20677e+06	2.05065e+06	1.23832e+07	7.06998e+06	6.57893e+06	1.07147e+07	2.07531e+07	1.74553e+07	1.4911e+07
Q9NW07	Zinc finger protein 358	ZNF358	ZNF358	STPSPTPVESSDPK	S484	2xPhospho [S1; S4]	0	0	2.42606e+06	1.8132e+06	2.38565e+06	0	1.83238e+06	1.61855e+06	0	0	2.68743e+06	0	2.49056e+06	0	0	3.61914e+06	2.0982e+06	0	0	3.94423e+06	3.88298e+06	0	2.32882e+06	0	2.26487e+06	3.4345e+06	1.60616e+06	3.52086e+06	2.29248e+06	0	2.64489e+06	2.65295e+06	0	3.12389e+06	2.56879e+06	0	2.42831e+06	3.00086e+06	0	2.47491e+06	3.77419e+06	4.81616e+06	4.03748e+06
Q9NW07	Zinc finger protein 358	ZNF358	ZNF358	STPSPTPVESSDPK	S487	2xPhospho [S1; S4]	0	0	2.42606e+06	1.8132e+06	2.38565e+06	0	1.83238e+06	1.61855e+06	0	0	2.68743e+06	0	2.49056e+06	0	0	3.61914e+06	2.0982e+06	0	0	3.94423e+06	3.88298e+06	0	2.32882e+06	0	2.26487e+06	3.4345e+06	1.60616e+06	3.52086e+06	2.29248e+06	0	2.64489e+06	2.65295e+06	0	3.12389e+06	2.56879e+06	0	2.42831e+06	3.00086e+06	0	2.47491e+06	3.77419e+06	4.81616e+06	4.03748e+06
Q9NW07	Zinc finger protein 358	ZNF358	ZNF358	NPDPGSGPGTLPDPSSKPLPGSRSTPSPTPVESSDPK	S484	2xPhospho [S24; S27]	0	0	0	0	0	0	0	0	0	98722.5	0	0	0	0	590554	0	0	0	992542	0	607464	0	0	742479	0	0	0	2.51506e+06	0	0	0	0	0	0	1.90567e+06	0	0	976025	0	0	0	0	0
Q9NW07	Zinc finger protein 358	ZNF358	ZNF358	NPDPGSGPGTLPDPSSKPLPGSRSTPSPTPVESSDPK	S487	2xPhospho [S24; S27]	0	0	0	0	0	0	0	0	0	98722.5	0	0	0	0	590554	0	0	0	992542	0	607464	0	0	742479	0	0	0	2.51506e+06	0	0	0	0	0	0	1.90567e+06	0	0	976025	0	0	0	0	0
Q9H4Z2	Zinc finger protein 335	ZNF335	ZNF335	LEISDLPDGVEGEPLVSSQSGQSPPEPQDPEAPSSSGPGHLVAMGK	S382	1xPhospho [S23]	0	0	0	0	0	0	0	0	0	1.96896e+06	249164	0	0	0	0	0	0	0	0	0	0	0	0	0	0	129154	280507	270041	165365	1.15572e+06	0	0	0	0	82112.5	3.33366e+06	0	0	666401	0	0	0	0
Q9H4Z2	Zinc finger protein 335	ZNF335	ZNF335	DGPEPPSPAK	S976	1xPhospho [S7]	0	0	0	0	0	0	0	0	0	0	0	0	1.6888e+06	0	0	1.52808e+06	0	2.33215e+06	1.23526e+06	1.33739e+06	1.5741e+06	0	1.71307e+06	1.26342e+06	1.66683e+06	1.61569e+06	1.9446e+06	9.78887e+06	1.26165e+06	2.1068e+06	1.71848e+06	1.29784e+06	0	2.96634e+06	6.15079e+06	0	0	1.38627e+06	1.34872e+06	0	1.46789e+06	0	1.64804e+06
M0R1P1	Zinc finger protein 333	ZNF333	ZNF333	GPASSPGAALVSGMHGTEGR	T83	1xPhospho [T17]; 1xOxidation [M14]	0	0	0	0	0	1.99574e+06	1.31771e+06	1.1163e+06	0	0	0	0	0	0	1.14182e+06	0	0	0	0	0	0	146209	0	0	0	0	0	550235	517357	0	127979	512755	0	0	0	487759	834042	0	655246	0	0	0	0
Q5BKZ1	DBIRD complex subunit ZNF326	ZNF326	ZNF326	ISLSKSPTK	S270	1xPhospho [S6]	5.379e+06	3.3893e+06	0	0	7.8395e+06	6.65448e+06	8.8926e+06	7.35675e+06	5.0115e+06	7.05081e+06	4.74661e+06	6.53869e+06	8.97e+06	6.01763e+06	5.94373e+06	5.13165e+06	7.6617e+06	8.83961e+06	8.45492e+06	7.63726e+06	1.14245e+07	5.38552e+06	8.94652e+06	2.10153e+07	1.14835e+07	6.94635e+06	7.00438e+06	4.31496e+07	1.34651e+07	4.05044e+06	4.07826e+06	6.97462e+06	0	8.95552e+06	8.81074e+06	9.56059e+06	1.18112e+07	1.3752e+07	2.96552e+06	5.49382e+06	1.02502e+07	3.43115e+06	1.48362e+07
Q5BKZ1	DBIRD complex subunit ZNF326	ZNF326	ZNF326	SMDSYLNQSYGMDNHSGGGGGSR	S56	1xPhospho [S9]	850360	0	0	0	0	0	1.0275e+06	0	0	0	1.08685e+06	0	0	0	0	0	0	0	0	0	0	0	682291	0	0	0	0	0	0	905461	0	0	0	0	0	0	0	0	0	0	0	0	0
Q5BKZ1	DBIRD complex subunit ZNF326	ZNF326	ZNF326	FGGSYGGR	S106	1xPhospho [S4]	1.98653e+06	1.82242e+06	0	0	2.61686e+06	2.19988e+06	2.91148e+06	2.09713e+06	0	3.80338e+06	2.91847e+06	2.99888e+06	0	3.74606e+06	1.98513e+06	1.82503e+06	1.70905e+06	1.21212e+06	1.79489e+06	0	1.41452e+06	0	0	0	0	0	1.3039e+06	0	863562	0	0	0	0	0	0	0	0	0	0	0	0	0	1.4303e+06
Q5VUA4	Zinc finger protein 318	ZNF318	ZNF318	SPPREQVIEDNMVPQGMPEQETTVGAIQDHTESSVHN	S2243	1xPhospho [S1]	0	0	0	1.18259e+07	0	0	0	0	9.01904e+06	0	0	0	0	0	0	0	0	1.13205e+06	0	1.24904e+06	637073	349585	0	0	0	0	0	0	0	351048	0	874150	0	2.05835e+06	0	0	545234	0	0	0	0	252813	0
Q5VUA4	Zinc finger protein 318	ZNF318	ZNF318	SPGLCSDSLEK	S136	1xCarbamidomethyl [C5]; 1xPhospho [S1]	8.09842e+06	8.63683e+06	1.46963e+07	8.41612e+06	9.6704e+06	1.08251e+07	8.54439e+06	1.34076e+07	8.16763e+06	1.01669e+07	1.03129e+07	4.61662e+06	2.23461e+07	5.90745e+06	8.43578e+06	1.07886e+07	9.7563e+06	7.77333e+06	5.65686e+06	1.24196e+07	7.90101e+06	4.42904e+06	1.5454e+07	1.25735e+07	4.05251e+06	1.89013e+07	7.92416e+06	3.18027e+07	5.67917e+06	7.89634e+06	9.68791e+06	1.0379e+07	5.61646e+06	3.50404e+07	1.6422e+07	5.62843e+06	8.14637e+06	6.38893e+06	4.64559e+06	8.23929e+06	3.3508e+07	2.50895e+07	1.70819e+07
Q5VUA4	Zinc finger protein 318	ZNF318	ZNF318	LGSPVDNLEDMDRDDLTDDSVFTR	S173	1xPhospho [S3]; 1xOxidation [M11]	1.79891e+06	2.88006e+06	4.71029e+06	6.85818e+06	0	0	9.99381e+06	1.05126e+07	253929	585013	0	582788	1.18079e+06	0	7.12775e+06	821895	702765	673267	0	703283	370905	173798	287055	908194	1.16946e+06	375278	145970	9.59608e+06	6.09377e+06	1.95502e+06	454498	118551	0	1.6387e+06	9.1368e+06	1.91839e+06	1.03219e+07	1.25763e+06	9.02862e+06	635698	1.82964e+06	0	4.98709e+06
Q5VUA4	Zinc finger protein 318	ZNF318	ZNF318	LGSPVDNLEDMDRDDLTDDSVFTR	S173	1xPhospho [S3]	418447	5.57638e+06	2.62324e+06	1.43911e+06	1.42983e+06	1.71498e+06	883243	1.56966e+06	417260	0	839267	170856	1.39359e+06	0	3.41003e+06	1.07506e+06	779909	853840	146863	1.00163e+06	594643	0	427407	747552	1.2011e+06	879475	459666	3.9566e+06	1.83171e+06	898495	288656	381718	0	2.98957e+06	675840	884372	4.84842e+06	1.68099e+06	2.13624e+06	976489	1.85467e+06	0	1.78674e+06
Q5VUA4	Zinc finger protein 318	ZNF318	ZNF318	SFPDIEDEEKFLYGDEEEDLKAESVPKPLGSSESEVMR	S527	1xPhospho [S1]	239613	0	766974	0	155474	245341	185055	0	0	0	120741	0	0	0	107339	0	0	0	552407	0	0	0	0	0	0	0	104162	119633	82371	0	177229	0	529079	0	0	0	157794	385564	0	128840	88796.3	0	0
Q5VUA4	Zinc finger protein 318	ZNF318	ZNF318	RRSPGLCSDSLEK	S136	1xCarbamidomethyl [C7]; 1xPhospho [S3]	2.51085e+07	2.98859e+07	2.02361e+07	2.50031e+07	3.49215e+07	3.29041e+07	3.81867e+07	3.52819e+07	1.99282e+07	3.19149e+07	3.06411e+07	2.27433e+07	5.99401e+07	2.74414e+07	5.3147e+07	3.53637e+07	2.95922e+07	3.24965e+07	2.4428e+07	4.73307e+07	3.06449e+07	2.14427e+07	4.76631e+07	5.3957e+07	4.05038e+07	4.19676e+07	3.60099e+07	1.19501e+08	3.21328e+07	2.91357e+07	1.95668e+07	3.96761e+07	2.28642e+07	1.0341e+08	2.35892e+07	2.1561e+07	2.06229e+07	2.34089e+07	4.62856e+07	3.585e+07	8.05572e+07	2.89608e+07	4.96478e+07
Q5VUA4	Zinc finger protein 318	ZNF318	ZNF318	RRSFPDIEDEEK	S527	1xPhospho [S3]	1.35442e+07	2.36586e+07	3.06957e+07	2.56077e+07	2.55098e+07	2.5458e+07	2.73504e+07	3.22621e+07	1.58748e+07	3.00379e+07	2.74645e+07	8.53303e+06	4.16524e+07	1.57671e+07	2.79632e+07	2.5793e+07	1.60222e+07	1.77062e+07	1.47618e+07	2.70119e+07	2.97161e+07	7.55896e+06	3.16458e+07	1.68821e+07	2.35443e+07	2.61623e+07	2.33409e+07	5.45473e+07	3.01009e+07	2.94228e+07	2.25328e+07	2.14762e+07	2.07405e+07	4.51967e+07	1.8678e+07	2.30858e+07	5.71675e+07	2.55228e+07	1.56515e+07	26421032	4.72931e+07	5.28817e+07	2.93592e+07
Q5VUA4	Zinc finger protein 318	ZNF318	ZNF318	TKSPKPAESPQSATK	S1037	1xPhospho [S3]	0	0	0	0	0	0	0	0	0	0	0	0	0	0	0	0	0	0	0	0	0	0	0	619169	0	0	0	0	0	0	0	0	0	0	0	0	1.46192e+06	0	0	0	0	0	0
Q5VUA4	Zinc finger protein 318	ZNF318	ZNF318	AFGGEEVILKGSPEEK	S1420	1xPhospho [S12]	1.76434e+07	4.86501e+06	6.30271e+06	9.74045e+06	2.68438e+07	1.48793e+07	4.46174e+06	4.68503e+06	2.06659e+07	491153	2.27133e+07	3.33723e+07	2.40264e+06	1.75749e+06	5.88069e+06	1.22988e+07	2.34258e+07	5.67253e+06	4.86295e+07	7.84165e+06	5.24267e+06	1.75825e+06	5.99482e+06	5.40386e+06	1.23358e+07	8.16347e+06	9.19647e+06	1.35243e+07	8.49947e+06	7.841e+06	2.59753e+06	0	0	2.40783e+07	801324	518606	7977579	1.01456e+07	8.21836e+06	0	5.83122e+06	0	4.82132e+06
Q5VUA4	Zinc finger protein 318	ZNF318	ZNF318	KESPTSSSFGK	S1267	1xPhospho [S3]	0	0	2.56258e+06	2.88439e+06	0	3.6745e+06	1.69378e+06	3.11216e+06	0	2.57561e+06	1.99526e+06	0	0	0	1.51046e+06	0	1.08558e+06	2.12717e+06	2.19102e+06	1.49994e+06	2.77801e+06	0	2.53148e+06	2.71379e+06	2.24501e+06	4.35681e+06	0	3.59558e+06	1.53705e+06	2.70689e+06	2.23429e+06	0	0	5.6051e+06	1.19505e+06	2.72903e+06	4.00402e+06	4.74746e+06	0	2.09252e+06	5.03176e+06	0	2.35324e+06
Q5VUA4	Zinc finger protein 318	ZNF318	ZNF318	SFPDIEDEEKFLYGDEEEDLKAESVPKPLGSSESEVMR	S527	1xPhospho [S1]; 1xOxidation [M37]	426265	0	766746	0	392777	434783	0	847835	171067	279542	463491	0	0	0	113339	260031	0	0	0	0	0	269073	0	559635	250209	243121	607910	0	865995	737342	550243	402920	0	0	0	164599	128238	0	0	0	258105	0	197771
Q5VUA4	Zinc finger protein 318	ZNF318	ZNF318	LEDQLSEGRNSPEKAENK	S1243	1xPhospho [S11]	0	0	2.34525e+06	0	0	0	0	2.98684e+06	0	0	0	0	3.9561e+06	0	0	2.99188e+06	0	0	0	1.53154e+06	2.6859e+06	0	3.75212e+06	4.13513e+06	827082	3.27951e+06	0	7.58111e+06	2.01834e+06	0	0	2.38325e+06	0	6.53811e+06	1.52581e+06	0	6.07788e+06	0	0	0	0	3.92581e+06	3.03671e+06
Q5VUA4	Zinc finger protein 318	ZNF318	ZNF318	ISAPELLLHSPAR	S1896	1xPhospho [S10]	0	0	0	0	0	0	0	0	0	0	0	0	0	0	0	0	0	0	0	0	0	0	0	0	0	0	0	7.046e+06	0	0	0	0	0	0	0	0	0	0	0	0	0	0	0
Q5VUA4	Zinc finger protein 318	ZNF318	ZNF318	SFPDIEDEEK	S527	1xPhospho [S1]	2.57469e+06	3.74208e+06	4.65586e+06	5.10559e+06	3.80862e+06	4.61622e+06	3.61208e+06	6.04693e+06	3.58319e+06	0	3.55412e+06	1.4407e+06	5.91108e+06	0	2.96551e+06	6.21815e+06	2.78043e+06	3.34183e+06	2.79375e+06	4.23216e+06	3.72515e+06	1.30769e+06	5.46985e+06	3.98508e+06	3.78608e+06	3.64015e+06	3.83753e+06	8.16173e+06	3.31227e+06	3.49369e+06	3.02072e+06	2.85069e+06	0	1.22617e+07	3.52499e+06	2.13772e+06	1.2378e+07	3.75962e+06	1.73813e+06	4.04931e+06	7.77986e+06	6.95301e+06	5.26721e+06
Q5VUA4	Zinc finger protein 318	ZNF318	ZNF318	KRPETWESPEKPK	S1971	1xPhospho [S8]	0	0	0	0	0	0	837551	0	0	0	0	0	1.80203e+06	0	0	0	0	0	0	788295	0	0	0	978979	0	0	0	3.3062e+06	0	0	0	0	0	0	0	0	0	0	0	0	0	0	0
Q5VUA4	Zinc finger protein 318	ZNF318	ZNF318	IPSPNILK	S2101	1xPhospho [S3]	840491	1.9535e+06	1.83632e+06	2.20622e+06	7.62604e+06	2.19136e+06	6.64164e+06	1.33844e+07	3.57721e+06	0	9.74051e+06	7.05897e+06	2.70681e+06	0	9.99939e+06	7.4141e+06	5.71306e+06	4.73975e+06	139781	1.08031e+07	1.22659e+07	1.05977e+06	8.56578e+06	1.01607e+07	1.01768e+07	1.13852e+07	1.20096e+07	6.27932e+07	1.84419e+07	8.60676e+06	3.09059e+06	1.01545e+07	0	6.63223e+07	1.87627e+07	1.13687e+07	2.87834e+07	1.70995e+07	1.7311e+07	4.66238e+06	2.33987e+07	0	1.34391e+07
Q5VUA4	Zinc finger protein 318	ZNF318	ZNF318	RSPGLCSDSLEK	S136	1xCarbamidomethyl [C6]; 1xPhospho [S2]	0	0	0	0	0	1.63538e+06	0	0	0	0	0	0	1.49697e+06	0	0	0	0	0	0	0	1.2049e+06	0	0	1.25873e+06	0	0	0	2.27192e+06	0	0	0	0	0	0	0	0	0	0	0	0	0	0	1.7164e+06
Q5VUA4	Zinc finger protein 318	ZNF318	ZNF318	CSSVDHCFSADR	S658	2xCarbamidomethyl [C1; C7]; 1xPhospho [S2]	0	0	0	0	0	0	0	0	0	0	0	0	0	0	0	0	1.02022e+06	0	0	0	0	0	0	0	0	0	0	1.12478e+06	0	0	0	0	0	0	0	0	0	0	0	0	0	0	0
Q5VUA4	Zinc finger protein 318	ZNF318	ZNF318	VSPAHRSPTVLCQK	S2035	1xCarbamidomethyl [C12]; 1xPhospho [S7]	9.95099e+06	9.32681e+06	1.01071e+07	1.67993e+07	3.4094e+06	5.5058e+06	5.24186e+06	1.0491e+06	1.42158e+06	0	1.42063e+06	0	3.01469e+06	0	1.94391e+07	0	4.01929e+06	0	0	5.35154e+06	4.28731e+06	0	2.37103e+06	5.78361e+06	2.80448e+06	0	2.66815e+06	8.4064e+06	0	0	0	0	0	3.39356e+06	1.74948e+06	496916	2.04441e+06	0	4.24458e+06	1.90437e+06	0	0	1.37369e+06
Q5VUA4	Zinc finger protein 318	ZNF318	ZNF318	VSPAHRSPTVLCQK	S2035	1xCarbamidomethyl [C12]; 2xPhospho [S7; S/T]	3.20433e+06	0	4.86171e+06	0	3.6668e+06	0	2.19063e+06	6.13209e+06	5.50119e+06	0	5.11093e+06	0	4.25987e+06	0	0	0	2.24561e+06	1.14665e+07	5.69605e+06	3.80627e+06	1.106e+06	0	1.94042e+06	6.87412e+06	0	9.01317e+06	2.35958e+06	2.40065e+07	0	0	1.6962e+06	3.74834e+06	0	3.15481e+07	4.70725e+06	0	1.81369e+06	1.04111e+06	0	5.66869e+06	1.32854e+07	0	1.35249e+07
Q5VUA4	Zinc finger protein 318	ZNF318	ZNF318	ITVGNDHFCVSTPERR	T161	1xCarbamidomethyl [C9]; 1xPhospho [T12]	0	0	1.5746e+06	0	0	0	0	0	0	0	0	0	0	0	1.78564e+06	0	0	0	0	0	0	0	0	0	0	0	0	6.23825e+06	0	0	0	0	0	8.25037e+06	0	0	0	0	2.11457e+06	2.5818e+06	5.06485e+06	0	2.14729e+06
Q5VUA4	Zinc finger protein 318	ZNF318	ZNF318	EEVKKESPTSSSFGK	S1267	1xPhospho [S7]	0	0	0	0	0	0	0	0	0	0	0	0	0	0	1.75461e+06	0	0	0	0	0	0	0	0	0	0	0	0	1.84679e+06	967449	0	0	0	0	4.84417e+06	0	0	2.79835e+06	814795	0	0	0	0	0
Q5VUA4	Zinc finger protein 318	ZNF318	ZNF318	RVSPSPPR	S79	2xPhospho [S3; S5]	2.43511e+06	1.7629e+07	2.92013e+07	1.92455e+07	2.75325e+07	2.51205e+06	3.13632e+07	2.60053e+07	2.27377e+07	2.25808e+07	2.73182e+07	1.84905e+07	4.96551e+07	2.5723e+07	1.62191e+07	2.66891e+07	2.01221e+07	1.73883e+07	1.35454e+07	3.57681e+07	2.35605e+07	1.19877e+07	2.97886e+07	1.92405e+07	2.74008e+07	2.28351e+07	3.12532e+07	4.42776e+07	2.0651e+07	2.72654e+07	2.17978e+07	3.1694e+07	3.81435e+07	1.5779e+08	2.148e+06	2.22894e+07	3.78119e+07	2.28275e+07	2.24113e+07	2.9317e+06	6.37458e+06	8.56506e+06	7.32139e+06
Q5VUA4	Zinc finger protein 318	ZNF318	ZNF318	RVSPSPPR	S81	2xPhospho [S3; S5]	2.43511e+06	1.7629e+07	2.92013e+07	1.92455e+07	2.75325e+07	2.51205e+06	3.13632e+07	2.60053e+07	2.27377e+07	2.25808e+07	2.73182e+07	1.84905e+07	4.96551e+07	2.5723e+07	1.62191e+07	2.66891e+07	2.01221e+07	1.73883e+07	1.35454e+07	3.57681e+07	2.35605e+07	1.19877e+07	2.97886e+07	1.92405e+07	2.74008e+07	2.28351e+07	3.12532e+07	4.42776e+07	2.0651e+07	2.72654e+07	2.17978e+07	3.1694e+07	3.81435e+07	1.5779e+08	2.148e+06	2.22894e+07	3.78119e+07	2.28275e+07	2.24113e+07	2.9317e+06	6.37458e+06	8.56506e+06	7.32139e+06
Q5VUA4	Zinc finger protein 318	ZNF318	ZNF318	DKLCSPLSEPGDPSK	S2189	1xCarbamidomethyl [C4]; 2xPhospho [S5; S8]	0	1.2886e+06	0	0	3.64087e+06	0	3.42705e+06	2.91758e+06	0	0	0	0	0	0	2.09161e+06	4.41137e+06	0	0	0	0	2.2516e+06	4.91429e+06	0	1.14208e+06	2.2434e+06	1.11611e+06	3.6472e+06	2.72848e+06	2.49045e+06	0	2.01722e+06	1.54306e+06	0	4.27546e+06	7.17416e+06	1.87183e+06	3.54335e+06	2.59966e+06	2.24775e+06	0	0	3.10687e+06	1.1519e+06
Q5VUA4	Zinc finger protein 318	ZNF318	ZNF318	DKLCSPLSEPGDPSK	S2192	1xCarbamidomethyl [C4]; 2xPhospho [S5; S8]	0	1.2886e+06	0	0	3.64087e+06	0	3.42705e+06	2.91758e+06	0	0	0	0	0	0	2.09161e+06	4.41137e+06	0	0	0	0	2.2516e+06	4.91429e+06	0	1.14208e+06	2.2434e+06	1.11611e+06	3.6472e+06	2.72848e+06	2.49045e+06	0	2.01722e+06	1.54306e+06	0	4.27546e+06	7.17416e+06	1.87183e+06	3.54335e+06	2.59966e+06	2.24775e+06	0	0	3.10687e+06	1.1519e+06
Q5VUA4	Zinc finger protein 318	ZNF318	ZNF318	VIPTVTPDKPK	T842	1xPhospho [T6]	0	0	0	0	0	0	0	0	0	0	0	0	0	0	0	0	0	0	0	0	0	0	0	0	0	0	0	3.43355e+06	0	0	0	0	0	4.35542e+06	0	0	1.04053e+06	0	0	0	0	0	0
Q5VUA4	Zinc finger protein 318	ZNF318	ZNF318	NSPPFLK	S709	1xPhospho [S2]	6.34891e+06	8.0726e+06	1.0835e+07	1.1809e+07	1.40195e+07	1.29382e+07	1.15583e+07	1.65839e+07	9.44597e+06	13951433	1.38344e+07	2.24668e+06	1.04028e+07	383430	9.30381e+06	6.5437e+06	7.70352e+06	7.08935e+06	6.8783e+06	1.51553e+07	1.11337e+07	4.40036e+06	1.28709e+07	1.23076e+07	7.22833e+06	1.33313e+07	7.31547e+06	3.32311e+07	8.67968e+06	1.22987e+07	7.52914e+06	8.14586e+06	0	7.79715e+07	9.64422e+06	2.22009e+07	3.36811e+07	9.62271e+06	6.92944e+06	1.29194e+07	2.23389e+07	1.73762e+07	1.8482e+07
Q5VUA4	Zinc finger protein 318	ZNF318	ZNF318	TKSSDTSSTSPLNSSASQEELHQDEGLVAAPIVSNSEKPIAK	S1620	2xPhospho [S14; S15]	0	0	864266	0	0	0	0	0	0	0	0	0	0	0	0	0	284727	0	0	0	0	0	0	0	0	0	0	0	0	0	0	0	0	492923	0	0	2.58989e+07	0	0	0	0	0	0
Q5VUA4	Zinc finger protein 318	ZNF318	ZNF318	TKSSDTSSTSPLNSSASQEELHQDEGLVAAPIVSNSEKPIAK	S1621	2xPhospho [S14; S15]	0	0	864266	0	0	0	0	0	0	0	0	0	0	0	0	0	284727	0	0	0	0	0	0	0	0	0	0	0	0	0	0	0	0	492923	0	0	2.58989e+07	0	0	0	0	0	0
Q5VUA4	Zinc finger protein 318	ZNF318	ZNF318	ASSLPSSAPAVK	S569	1xPhospho [S3]	0	0	0	0	0	0	0	0	0	0	0	0	0	0	0	0	0	0	0	0	0	0	0	0	0	926255	0	0	0	0	0	0	0	0	0	0	0	0	0	0	0	0	0
Q5VUA4	Zinc finger protein 318	ZNF318	ZNF318	ERSKDFQVK	S1945	1xPhospho [S3]	3.79586e+07	2.9452e+06	1.52503e+06	0	0	0	3.3462e+06	0	0	0	0	1.25716e+07	0	0	2.31375e+06	0	3.98002e+06	0	716122	3.50326e+06	1.47424e+06	0	5.52234e+06	3.56937e+06	0	1.95436e+06	2.03405e+06	8.76825e+06	0	3.04208e+06	0	1.25795e+07	83950.9	4.37457e+06	8.56249e+06	0	1.68906e+07	2.01663e+06	3.34841e+06	0	0	0	2.31621e+06
A6NFI3	Zinc finger protein 316	ZNF316	ZNF316	GGDAKSPVLQEK	S112	1xPhospho [S6]	0	7.56657e+06	0	1.0708e+07	1.13515e+07	8.8495e+06	6.62247e+06	6.74192e+06	6.09483e+06	8.08753e+06	9.98504e+06	4.69579e+06	8.93572e+06	6.23227e+06	5.73435e+06	1.01825e+07	7.61477e+06	5.60575e+06	1.1226e+07	1.16332e+07	1.69016e+07	0	1.54991e+07	1.41864e+07	1.10497e+07	8.16843e+06	9.994e+06	1.5403e+07	1.05597e+07	6.97458e+06	9.70911e+06	7.27493e+06	0	6.68776e+06	1.05804e+07	5.64422e+06	5.82825e+06	2.13096e+07	5.08392e+06	1.01718e+07	9.84968e+06	2.8717e+07	1.79921e+07
A6NFI3	Zinc finger protein 316	ZNF316	ZNF316	SFSQSSALAR	S467	1xPhospho [S3]	0	0	0	0	0	0	0	0	0	0	806095	0	0	0	0	0	0	0	0	1.60795e+06	418586	0	0	0	496755	0	1.47309e+06	0	525346	0	677464	0	0	0	0	0	623713	0	0	0	0	0	573639
A6NFI3	Zinc finger protein 316	ZNF316	ZNF316	REPGETAAAAGPEDTDPGPEGSEVGEADGEAEAAAEER	S540	1xPhospho [S22]	0	1.47782e+06	2.07459e+06	0	0	0	0	1.56739e+06	0	0	0	0	0	0	0	1.42552e+06	0	0	1.65861e+06	0	0	0	0	0	1.67719e+06	0	1.10439e+06	0	0	0	0	0	0	1.25671e+06	0	0	0	0	0	0	0	0	0
J3KNV1	Zinc finger protein 292	ZNF292	ZNF292	SDLPAFSAEVEEESEAGKESEETETK	S2149	1xPhospho [S14]	348229	0	0	0	1.02875e+06	0	669883	0	0	0	0	2.30914e+06	0	0	0	0	0	0	2.32238e+06	652044	0	0	0	0	0	550495	0	709175	1.41232e+06	7.03248e+06	1.47027e+06	0	0	0	1.04155e+06	0	0	749767	0	0	0	0	891706
J3KRD3	Zinc finger protein 286A (Fragment)	ZNF286A	ZNF286A	GALSSQDSPHFQEK	S19	1xPhospho [S8]	0	0	0	0	1.53832e+06	0	0	0	0	3.34729e+06	0	0	3.34577e+06	0	2.17876e+06	0	0	0	0	0	0	0	3.76751e+06	0	1.93982e+06	1.07964e+06	0	4.25814e+06	1.60037e+06	0	0	0	0	0	0	0	2.27748e+06	2.637e+06	0	0	0	0	0
Q9Y2X9	Zinc finger protein 281	ZNF281	ZNF281	VKTPTSQSYR	T888	1xPhospho [T3]	0	4.47902e+06	6.08137e+06	5.74383e+06	5.33741e+06	7.26762e+06	4.94852e+06	0	0	5.42011e+06	5.41505e+06	0	0	1.57656e+07	3.02272e+06	3.29307e+06	3.33925e+06	2.93607e+06	2.00623e+06	1.39393e+07	7.47451e+06	0	8.4707e+06	8.93014e+06	0	5.12593e+06	5.25455e+06	2.06412e+07	3.81127e+06	2.76473e+06	2.84594e+06	2.08281e+06	63788.9	4.6995e+06	4.98445e+06	4.04351e+06	8.82554e+06	5.30914e+06	3.13344e+06	0	0	0	881176
Q8ND82	Zinc finger protein 280C	ZNF280C	ZNF280C	SEPHSPGIPEIFR	S80	1xPhospho [S5]	0	1.20138e+06	2.69438e+07	3.15534e+06	0	1.25894e+07	7.43945e+06	8.80707e+06	1.37697e+06	0	9.44818e+06	7.42143e+06	0	0	7.66566e+06	0	0	0	0	3.41992e+06	4.26009e+06	0	0	3.18398e+06	0	0	0	2.95605e+07	1.02061e+07	0	0	0	0	0	5.25985e+06	1.89984e+07	1.17687e+07	0	1.05351e+07	5.15539e+06	6.7314e+06	0	2.77884e+06
Q8ND82	Zinc finger protein 280C	ZNF280C	ZNF280C	CRDPPSNPVAASPR	S105	1xCarbamidomethyl [C1]; 1xPhospho [S12]	0	0	0	5.49611e+06	1.98215e+06	0	0	743249	0	1.98368e+06	0	0	0	0	0	0	2.53265e+06	0	0	1.13828e+06	0	0	0	0	0	0	1.86313e+06	2.69184e+06	0	2.56898e+06	0	0	0	0	2.61588e+06	0	0	0	1.10414e+06	0	0	2.9415e+06	0
Q14586	Zinc finger protein 267	ZNF267	ZNF267	HGSCDLENLHLR	S105	1xCarbamidomethyl [C4]; 1xPhospho [S3]	0	0	0	0	0	0	0	0	0	0	0	0	0	0	0	0	0	0	0	0	0	0	0	0	0	0	0	0	0	0	0	0	0	0	0	905710	1.51348e+06	0	0	0	1.43459e+06	0	0
E9PL28	Zinc finger protein 250 (Fragment)	ZNF250	ZNF250	GESQNTDLSPKPLISEQTVILGK	S129	1xPhospho [S9]	0	128637	0	0	0	0	0	0	0	0	0	0	0	0	0	53784.5	77940.1	0	0	0	0	0	0	0	0	0	51830.8	2.09129e+06	0	0	59997.9	0	0	175802	0	0	0	0	52331.1	0	0	0	0
A0A024RC47	Zinc finger protein 24 (KOX 17), isoform CRA_b	ZNF24	ZNF24	VKLEEDPDGEEGSSIPWNHLPDPEIFR	S39	1xPhospho [S14]	510474	376537	1.0688e+06	358666	164199	0	0	98363.5	0	0	0	130698	0	260876	0	0	185973	93435.3	287926	0	189082	344022	0	106362	143872	0	180738	337033	0	0	157290	0	0	0	0	0	0	332486	0	0	0	0	118653
A0A024R7T4	Zinc finger protein 22 (KOX 15), isoform CRA_a	ZNF22	ZNF22	SLDDKPYK	S49	1xPhospho [S1]	8.73368e+07	1.28325e+08	1.18886e+08	2.21753e+08	2.04343e+08	1.66469e+08	2.07901e+08	8.1626e+07	1.30553e+08	3.105e+08	2.34062e+08	2.69138e+08	3.60119e+08	3.34934e+08	1.85363e+08	1.92423e+08	2.91364e+08	2.81484e+08	1.77856e+08	1.38901e+08	2.77077e+08	1.60633e+08	1.37498e+08	1.58592e+08	2.72868e+08	5.6523e+07	185390331	9.32615e+07	1.88649e+08	186555147	5.52768e+07	1.52395e+08	3.72909e+08	5.66675e+07	1.46666e+08	5.79998e+07	1.3252e+08	1.31551e+08	1.43006e+08	5.29793e+07	7.93201e+07	1.11365e+08	1.06531e+08
A0A024R7T4	Zinc finger protein 22 (KOX 15), isoform CRA_a	ZNF22	ZNF22	RSLDDKPYK	S49	1xPhospho [S2]	0	1.33819e+06	0	0	0	0	0	0	0	1.65112e+06	0	0	0	0	6.03278e+06	0	0	0	0	0	0	0	0	0	0	0	0	0	0	0	0	0	0	0	0	0	0	0	0	0	0	0	0
Q9P2Y4	Zinc finger protein 219	ZNF219	ZNF219	APSGHLAPSPPAFDGELDLQR	S16	1xPhospho [S9]	271219	461790	1.3797e+06	0	0	128343	2.44246e+06	895335	0	0	88067.3	0	0	0	928730	0	0	157106	0	0	0	0	0	0	0	0	97167.7	1.2501e+07	1.62245e+06	0	0	206598	0	325691	0	1.19351e+06	336136	148702	3.88708e+06	0	0	0	660653
Q9P2Y4	Zinc finger protein 219	ZNF219	ZNF219	APSGHLAPSPPAFDGELDLQR	S10	2xPhospho [S3; S9]	0	238853	559641	1.10378e+06	450000	877331	423097	0	0	0	0	0	0	0	0	469333	511610	0	308007	185265	281249	0	222695	254592	207342	249802	163995	3.41428e+06	0	469307	236479	0	0	0	309563	167668	581189	0	251348	0	106636	0	0
Q9P2Y4	Zinc finger protein 219	ZNF219	ZNF219	APSGHLAPSPPAFDGELDLQR	S16	2xPhospho [S3; S9]	0	238853	559641	1.10378e+06	450000	877331	423097	0	0	0	0	0	0	0	0	469333	511610	0	308007	185265	281249	0	222695	254592	207342	249802	163995	3.41428e+06	0	469307	236479	0	0	0	309563	167668	581189	0	251348	0	106636	0	0
Q9P2Y4	Zinc finger protein 219	ZNF219	ZNF219	EATPTPAPAAPEEPPAPPEFR	T259	1xPhospho [T5]	3.46447e+07	4.67238e+07	5.38958e+07	2.62066e+07	7.60329e+07	1.50109e+08	1.02828e+08	7.31146e+07	9.19299e+07	0	1.10756e+08	184440465	0	1.47506e+06	65321330	0	0	2.72916e+07	0	3.23413e+06	2.38066e+07	0	5.36144e+06	4.54464e+06	1.2957e+06	0	9.23214e+06	3.83182e+06	1.74831e+07	0	0	0	0	0	0	2.29882e+07	1.78315e+07	0	1.79601e+07	1.17116e+08	5.55904e+07	0	3.10774e+07
Q9P2Y4	Zinc finger protein 219	ZNF219	ZNF219	GRRPPQADASPPYAR	S684	1xPhospho [S10]	0	0	0	3.86194e+06	3.50423e+06	2.57497e+06	3.57346e+06	1.10672e+06	0	1.1729e+06	1.5471e+06	1.42483e+06	9.11856e+06	2.54233e+06	8.05534e+06	1.95247e+06	0	1.04366e+06	0	4.45705e+06	1.55164e+06	0	2.99922e+06	3.4066e+06	3.9345e+06	0	3.15665e+06	1.11217e+07	2.40688e+06	2.00144e+06	0	0	0	0	3.06608e+06	0	1.24468e+06	4.17285e+06	8.9909e+06	0	2.48688e+06	0	1.80099e+06
Q9P2Y4	Zinc finger protein 219	ZNF219	ZNF219	VPSGETPPSPSQEGEEGSGLSRPGEAGLGGQER	S692	2xPhospho [S3; S9]	3.27133e+07	1.1272e+08	4.96625e+07	4.73585e+07	1.06645e+08	3.25206e+08	4.67958e+07	3.06431e+07	3.87746e+08	3.22412e+08	2.92639e+07	1.73029e+08	2.63685e+07	5.41866e+06	5.63684e+07	1.21408e+08	9.17917e+07	115265956	1.46742e+08	2.31929e+07	3.10425e+07	1.38259e+08	5.14318e+06	2.83669e+07	3.44264e+07	958976	2.47919e+07	5.30443e+06	2.23377e+07	1.12457e+08	0	8.83996e+06	6.27296e+07	0	1.72859e+06	0	1.72999e+06	3.375e+07	1.37785e+07	9.06639e+06	1.30072e+07	8.45209e+06	8.89268e+06
Q9P2Y4	Zinc finger protein 219	ZNF219	ZNF219	VPSGETPPSPSQEGEEGSGLSRPGEAGLGGQER	S698	2xPhospho [S3; S9]	3.27133e+07	1.1272e+08	4.96625e+07	4.73585e+07	1.06645e+08	3.25206e+08	4.67958e+07	3.06431e+07	3.87746e+08	3.22412e+08	2.92639e+07	1.73029e+08	2.63685e+07	5.41866e+06	5.63684e+07	1.21408e+08	9.17917e+07	115265956	1.46742e+08	2.31929e+07	3.10425e+07	1.38259e+08	5.14318e+06	2.83669e+07	3.44264e+07	958976	2.47919e+07	5.30443e+06	2.23377e+07	1.12457e+08	0	8.83996e+06	6.27296e+07	0	1.72859e+06	0	1.72999e+06	3.375e+07	1.37785e+07	9.06639e+06	1.30072e+07	8.45209e+06	8.89268e+06
Q9P2Y4	Zinc finger protein 219	ZNF219	ZNF219	GGEAEPLDLSLR	S630	1xPhospho [S10]	0	0	0	0	0	0	0	0	0	0	0	0	0	0	0	0	0	0	0	0	0	0	0	0	0	0	0	0	0	0	0	0	0	0	0	0	0	0	0	0	0	0	456154
Q9P2Y4	Zinc finger protein 219	ZNF219	ZNF219	RPPQADASPPYAR	S684	1xPhospho [S8]	7.32699e+06	4.44077e+06	9.42412e+06	9.30139e+06	2.24026e+07	7.63417e+06	1.29223e+07	6.33274e+06	5.47941e+06	1.12426e+07	1.37934e+07	1.1348e+07	4.19355e+07	0	6.68782e+06	7.39573e+06	4.88505e+06	5.21067e+06	8.63684e+06	2.60189e+07	7.69686e+06	0	1.85985e+07	2.03646e+07	8.32405e+06	3.14292e+06	1.41891e+07	3.97754e+07	5.87684e+06	1.52308e+07	7.94059e+06	5.58863e+06	0	1.07224e+07	8.25998e+06	0	0	0	0	2.20932e+07	4.89049e+07	8.43824e+06	2.16386e+07
A0A0S2Z4L6	Zinc finger protein 213 isoform 1 (Fragment)	ZNF213	ZNF213	RRPSVPQEQHSHSAQPPALLK	S165	1xPhospho [S4]	0	767995	5.3141e+06	0	2.69267e+06	2.25039e+06	4.21723e+06	1.42949e+06	0	0	3.54615e+06	0	0	0	1.49134e+06	1.22699e+06	947352	0	0	1.37931e+06	4.6725e+06	0	4.0631e+06	3.22457e+06	1.47627e+06	0	764966	626011	3.33545e+06	0	0	0	0	0	0	0	0	0	1.12871e+06	0	0	6.12267e+06	1.79779e+06
O95201	Zinc finger protein 205	ZNF205	RhitH;ZNF205	GAPESGEEGLAPDSEVGR	S292	1xPhospho [S5]	0	0	0	0	0	0	0	0	0	0	0	0	0	0	0	0	0	0	0	0	0	0	0	0	0	0	0	0	0	0	0	0	0	0	0	0	0	0	0	0	0	0	917270
Q9BSG1	Zinc finger protein 2	ZNF2	ZNF2	ECLGRQSPLCPK	S119	2xCarbamidomethyl [C2; C10]; 1xPhospho [S7]	7.24398e+06	0	2.07288e+06	0	3.25697e+06	1.98498e+06	2.79959e+06	3.0356e+06	0	0	0	0	0	0	3.21648e+06	3.85205e+06	0	0	0	3.99735e+06	7.69763e+06	0	5.02077e+06	4.36715e+06	3.22146e+06	4.03483e+06	4.80851e+06	3.42419e+06	0	0	2.52109e+06	0	0	0	3.3516e+06	685819	2.24444e+06	1.6356e+06	2.86989e+06	4.23163e+06	2.22131e+06	0	2.90349e+06
O15231	Zinc finger protein 185	ZNF185	ZNF185;DKFZp686O1389;DKFZp686B22130	SSAQLSDGNVGSGATGSRPEGLAAVDIGSER	S342	1xPhospho [S2]	0	0	6.35771e+06	0	3.83435e+06	0	0	0	0	148098	1.28793e+06	0	0	0	0	0	0	0	146015	0	0	0	1.334e+06	0	0	0	0	5.22236e+06	0	0	0	0	0	0	1.05089e+06	4.22087e+06	0	0	0	0	0	0	0
O15231	Zinc finger protein 185	ZNF185	ZNF185;DKFZp686O1389;DKFZp686B22130	GGQGDPAVPTQQPADPSTPEQQNSPSGSEQFVR	S512	2xPhospho [S17; S24]	0	1.22531e+06	0	0	0	2.11398e+06	0	0	0	0	0	0	0	573051	0	0	0	0	0	0	0	0	0	1.71385e+06	1.63523e+06	5.81372e+06	0	3.31424e+06	1.69061e+06	0	9.67469e+06	5.97937e+06	0	0	2.90408e+06	3.17761e+06	0	0	0	0	0	0	0
O15231	Zinc finger protein 185	ZNF185	ZNF185;DKFZp686O1389;DKFZp686B22130	GGQGDPAVPTQQPADPSTPEQQNSPSGSEQFVR	S519	2xPhospho [S17; S24]	0	1.22531e+06	0	0	0	2.11398e+06	0	0	0	0	0	0	0	573051	0	0	0	0	0	0	0	0	0	1.71385e+06	1.63523e+06	5.81372e+06	0	3.31424e+06	1.69061e+06	0	9.67469e+06	5.97937e+06	0	0	2.90408e+06	3.17761e+06	0	0	0	0	0	0	0
O15231	Zinc finger protein 185	ZNF185	ZNF185;DKFZp686O1389;DKFZp686B22130	SPSSCMVTVTVTATSEQPHIYIPAPASELDSSSTTK	S540	1xCarbamidomethyl [C5]; 1xPhospho [S3]; 1xOxidation [M6]	0	0	0	0	0	0	362059	0	0	1.29598e+06	0	0	0	0	0	996219	0	390862	840595	0	160317	889675	0	0	235180	0	0	40293.3	0	0	290863	0	0	0	0	0	0	0	319042	240738	0	0	0
O15231	Zinc finger protein 185	ZNF185	ZNF185;DKFZp686O1389;DKFZp686B22130	RESCGSSVLTDFEGKDVATK	S468	1xCarbamidomethyl [C4]; 2xPhospho [S/T]	0	0	1.20096e+06	857709	911293	0	1.01073e+06	542649	0	0	2.11954e+06	0	0	0	0	0	0	860951	0	0	0	0	0	1.10973e+06	0	1.43756e+06	0	1.8809e+06	0	0	1.48403e+06	3.21422e+06	0	0	986034	5.54179e+06	0	0	0	0	0	0	1.95984e+06
O15231	Zinc finger protein 185	ZNF185	ZNF185;DKFZp686O1389;DKFZp686B22130	VRSPSSCMVTVTVTATSEQPHIYIPAPASELDSSSTTK	S538	1xCarbamidomethyl [C7]; 1xPhospho [S3]	0	0	0	0	0	93619.2	0	0	0	0	0	0	0	0	111168	0	0	0	0	57100	0	0	207982	54274.3	0	0	0	0	0	0	119409	0	0	138068	0	82604.1	0	0	0	0	0	0	26303
O15231	Zinc finger protein 185	ZNF185	ZNF185;DKFZp686O1389;DKFZp686B22130	GALADYEGKDVATR	Y408	1xPhospho [Y6]	0	0	3.44115e+06	0	1.29496e+06	0	1.62882e+06	2.14084e+06	0	0	2.62529e+06	0	0	0	1.36723e+06	0	1.28615e+06	1.36939e+06	1.45216e+06	985321	896504	0	0	0	1.3287e+06	4.91145e+06	2.11553e+06	1.91724e+06	0	3.50236e+06	2.37002e+07	1.69924e+06	0	0	2.11607e+06	9.416e+06	1.27799e+06	3.58204e+06	1.74228e+06	0	0	0	0
O15231	Zinc finger protein 185	ZNF185	ZNF185;DKFZp686O1389;DKFZp686B22130	RRSEAASGVLR	S178	1xPhospho [S3]	0	0	0	0	0	0	0	0	0	0	0	0	0	0	0	0	0	0	0	0	0	0	0	0	0	0	0	0	0	0	0	0	0	0	0	2.69593e+06	0	0	0	0	0	0	0
O15231	Zinc finger protein 185	ZNF185	ZNF185;DKFZp686O1389;DKFZp686B22130	QSSPSGSEQLVR	S453	2xPhospho [S3; S5]	5.58492e+06	0	4.56583e+06	3.01736e+06	1.36598e+06	0	1.42166e+06	0	0	0	0	0	2.75688e+06	0	0	2.24579e+06	0	0	0	0	0	0	0	2.47661e+06	0	2.5668e+06	0	0	0	0	6.14783e+06	7.33649e+06	0	0	0	3.2744e+06	0	0	0	0	0	0	0
O15231	Zinc finger protein 185	ZNF185	ZNF185;DKFZp686O1389;DKFZp686B22130	QSSPSGSEQLVR	S455	2xPhospho [S3; S5]	5.58492e+06	0	4.56583e+06	3.01736e+06	1.36598e+06	0	1.42166e+06	0	0	0	0	0	2.75688e+06	0	0	2.24579e+06	0	0	0	0	0	0	0	2.47661e+06	0	2.5668e+06	0	0	0	0	6.14783e+06	7.33649e+06	0	0	0	3.2744e+06	0	0	0	0	0	0	0
O15231	Zinc finger protein 185	ZNF185	ZNF185;DKFZp686O1389;DKFZp686B22130	ATSFSSAGEVPKPRPPSTR	T63	2xPhospho [T2; S17]	0	0	2.82861e+06	0	888897	1.41469e+06	0	785443	0	1.08812e+06	0	1.77736e+06	0	3.40806e+06	0	0	0	0	1.08206e+06	0	0	0	0	0	0	0	0	1.08101e+06	693884	0	0	0	0	0	0	4.57652e+06	0	0	0	0	0	0	0
O15231	Zinc finger protein 185	ZNF185	ZNF185;DKFZp686O1389;DKFZp686B22130	ATSFSSAGEVPKPRPPSTR	S78	2xPhospho [T2; S17]	0	0	2.82861e+06	0	888897	1.41469e+06	0	785443	0	1.08812e+06	0	1.77736e+06	0	3.40806e+06	0	0	0	0	1.08206e+06	0	0	0	0	0	0	0	0	1.08101e+06	693884	0	0	0	0	0	0	4.57652e+06	0	0	0	0	0	0	0
O15231	Zinc finger protein 185	ZNF185	ZNF185;DKFZp686O1389;DKFZp686B22130	SEAASGVLR	S178	1xPhospho [S1]	0	658447	746293	0	0	1.56338e+06	1.19647e+06	0	1.55879e+06	0	0	0	0	0	0	0	0	0	698430	0	478579	1.16345e+06	554982	0	0	0	529997	0	0	0	0	0	0	692624	526867	1.00327e+06	1.15374e+06	1.40672e+06	834558	0	0	0	0
O15231	Zinc finger protein 185	ZNF185	ZNF185;DKFZp686O1389;DKFZp686B22130	LQILTPR	T289	1xPhospho [T5]	0	0	3.3076e+06	2.84378e+06	0	5.12695e+06	1.20921e+06	1.35178e+06	1.34106e+06	0	3.78938e+06	1.8559e+06	3.95036e+06	0	1.75813e+06	0	0	0	0	0	0	0	0	0	0	3.81917e+06	1.6169e+06	3.10001e+06	0	0	935334	1.02066e+06	0	0	0	8.19097e+06	780929	0	0	0	0	0	1.24673e+06
J3KSA1	Zinc finger protein 18 (Fragment)	ZNF18	ZNF18	DQELLHASCQASGEVPSQASLR	S108	1xCarbamidomethyl [C9]; 1xPhospho [S20]	0	0	1.90582e+06	6.9907e+06	0	0	0	0	0	0	0	0	0	0	0	6.01497e+06	0	0	0	0	2.61838e+06	0	0	0	19462.7	0	0	2.11666e+06	0	0	0	0	0	0	0	0	0	9.90845e+06	0	0	0	0	0
Q15697	Zinc finger protein 174	ZNF174	ZNF174	VEYISSPLK	S287	1xPhospho [S6]	0	0	0	0	425713	0	389887	0	0	0	336326	0	0	0	0	0	0	0	0	0	0	0	0	0	0	0	0	1.63128e+06	0	0	0	0	0	0	0	0	0	0	0	0	0	0	0
Q15697	Zinc finger protein 174	ZNF174	ZNF174	ESSPAEPSQAGAYDR	S173	1xPhospho [S2]	0	1.45859e+06	2.01968e+06	2.32835e+06	0	2.51823e+06	0	0	0	0	2.26379e+06	0	6.02771e+06	2.95999e+06	0	4.13989e+06	0	0	1.92395e+06	2.46495e+06	4.14999e+06	0	1.4997e+06	4.39847e+06	2.96173e+06	3.45615e+06	2.51354e+06	0	0	0	0	4.32693e+06	0	0	0	0	0	1.65933e+06	0	0	2.74225e+06	0	1.90705e+06
M0QZ49	Zinc finger protein 160 (Fragment)	ZNF160	ZNF160	HESPDIEDFSFKEPQK	S87	1xPhospho [S3]	0	0	0	0	0	0	0	0	0	0	0	0	0	0	0	0	0	0	0	564910	0	0	766900	635796	0	976101	0	1.09957e+06	0	0	0	0	0	0	0	0	0	0	0	0	1.06286e+06	0	399832
A0A024R418	Zinc finger protein 142 (Clone pHZ-49), isoform CRA_a	ZNF142	ZNF142	GLPRPDSPIPLQPVLPGTQASEDTESGKPPPASQEAELLLPK	S904	1xPhospho [S7]	402763	0	1.101e+06	0	237172	130765	0	0	0	0	0	0	0	0	0	237771	177749	139210	0	0	265044	0	0	0	123151	135877	165105	1.09617e+06	129522	401714	0	173455	0	260576	0	0	103506	0	455203	0	0	0	0
Q9H2Y7	Zinc finger protein 106	ZNF106	ZFP106;ZNF106;DKFZp451A177	RHSAQLSSDHIIPLMHLAK	S937	1xPhospho [S3]	0	0	0	0	0	0	0	0	0	0	0	0	0	0	0	0	0	0	0	0	498296	0	0	0	0	0	0	0	0	0	0	0	0	0	0	0	0	0	0	0	0	0	0
Q9H2Y7	Zinc finger protein 106	ZNF106	ZFP106;ZNF106;DKFZp451A177	NRENSPSSQSAGLSSINK	S1279	1xPhospho [S5]	5.15176e+06	1.281e+06	5.59091e+06	2.08595e+06	3.30413e+06	2.68823e+06	6.01852e+06	8.26841e+06	6.39985e+06	0	4.1831e+06	0	5.91154e+06	2.85685e+06	5.40504e+06	0	3.88544e+06	1.31144e+06	2.33979e+06	2.69471e+06	7.12912e+06	0	4.0194e+06	8.09009e+06	5.89958e+06	7.04096e+06	6.48469e+06	8.12631e+06	2.45499e+06	4.37772e+06	4.98388e+06	6.53024e+06	0	1.02638e+07	1.2177e+07	5.69779e+06	9.18281e+06	1.26432e+07	4.58813e+06	0	5.67337e+06	0	5.00085e+06
Q9H2Y7	Zinc finger protein 106	ZNF106	ZFP106;ZNF106;DKFZp451A177	AAHVPENSDTEQDVLTVKPVRK	S1370	1xPhospho [S8]	0	0	0	0	0	910046	1.28258e+06	703822	0	0	0	0	0	0	3.99095e+06	0	0	0	0	515018	654087	0	0	487316	962174	0	676129	0	689231	0	0	0	0	0	0	0	0	0	3.27701e+06	0	0	0	0
Q9H2Y7	Zinc finger protein 106	ZNF106	ZFP106;ZNF106;DKFZp451A177	EPHSPADQPEQQAESTLTSAETR	S1328	1xPhospho [S4]	0	2.19783e+06	2.83872e+06	3.07623e+06	2.43472e+06	4.61046e+06	2.84531e+06	1.83051e+06	1.51781e+06	2.1409e+06	2.93472e+06	0	6.52461e+06	0	1.4568e+06	1.18523e+06	0	1.66355e+06	0	1.87154e+06	2.28627e+06	0	2.28005e+06	2.80416e+06	0	0	0	1.11984e+06	0	0	2.24617e+06	0	0	0	0	0	2.1065e+06	0	1.77762e+06	0	0	0	1.56344e+06
Q9H2Y7	Zinc finger protein 106	ZNF106	ZFP106;ZNF106;DKFZp451A177	SLSESSVIMDR	S861	1xPhospho [S3]; 1xOxidation [M9]	0	905002	0	7.67225e+06	0	0	5.67287e+06	5.63575e+06	0	0	9.46459e+06	0	1.47015e+06	0	1.36363e+06	2.74706e+06	0	1.81835e+06	1.45052e+06	2.30793e+06	2.01964e+06	0	2.13946e+06	0	1.09471e+06	2.37715e+06	0	0	848104	1.9727e+06	0	0	0	0	810876	0	0	1.94629e+06	1.55186e+06	0	2.62662e+06	6.27753e+06	1.31006e+06
Q9H2Y7	Zinc finger protein 106	ZNF106	ZFP106;ZNF106;DKFZp451A177	ATGDGSSPELPSLER	S1025	2xPhospho [S6; S7]	2.04057e+06	1.54589e+06	1.26072e+06	0	1.15215e+06	0	2.94438e+06	1.82727e+06	1.03883e+06	0	632390	0	0	0	2.19848e+06	53056.4	652267	2.19245e+06	0	3.59691e+06	1.36955e+06	2.03972e+06	1.50175e+06	1.11695e+06	0	1.40694e+06	1.47065e+06	2.07274e+06	763745	1.24216e+06	1.55234e+06	1.08841e+06	0	0	1.48753e+06	500998	0	824320	438236	0	2.71186e+06	0	1.05566e+06
Q9H2Y7	Zinc finger protein 106	ZNF106	ZFP106;ZNF106;DKFZp451A177	ATGDGSSPELPSLER	S1026	2xPhospho [S6; S7]	2.04057e+06	1.54589e+06	1.26072e+06	0	1.15215e+06	0	2.94438e+06	1.82727e+06	1.03883e+06	0	632390	0	0	0	2.19848e+06	53056.4	652267	2.19245e+06	0	3.59691e+06	1.36955e+06	2.03972e+06	1.50175e+06	1.11695e+06	0	1.40694e+06	1.47065e+06	2.07274e+06	763745	1.24216e+06	1.55234e+06	1.08841e+06	0	0	1.48753e+06	500998	0	824320	438236	0	2.71186e+06	0	1.05566e+06
A0A087WVZ6	Protein kinase C-binding protein 1	ZMYND8	ZMYND8;DKFZp564P1772	GKDETDSPTVHLGLDSDSESELVIDLGEDHSGR	S704	2xPhospho [S/T]	107072	0	0	0	97452.7	0	156976	0	0	0	0	0	0	0	291493	0	0	0	0	0	131083	0	0	0	0	0	0	0	0	167644	0	0	0	0	0	0	0	0	0	0	0	0	0
A0A087WVZ6	Protein kinase C-binding protein 1	ZMYND8	ZMYND8;DKFZp564P1772	QDVVGKTPPSTTVGSHSPPETPVLTR	T741	2xPhospho [T7; S17]	0	0	4.90781e+06	0	0	2.80756e+06	0	0	0	132164	675764	0	0	402203	1.95916e+06	2.48708e+06	0	0	0	0	0	0	0	1.64863e+06	0	0	0	3.23403e+06	2.99811e+06	0	0	0	0	0	0	4.19921e+06	431534	2.93072e+06	3.83706e+06	0	0	0	0
A0A087WVZ6	Protein kinase C-binding protein 1	ZMYND8	ZMYND8;DKFZp564P1772	QDVVGKTPPSTTVGSHSPPETPVLTR	S751	2xPhospho [T7; S17]	0	0	4.90781e+06	0	0	2.80756e+06	0	0	0	132164	675764	0	0	402203	1.95916e+06	2.48708e+06	0	0	0	0	0	0	0	1.64863e+06	0	0	0	3.23403e+06	2.99811e+06	0	0	0	0	0	0	4.19921e+06	431534	2.93072e+06	3.83706e+06	0	0	0	0
A0A087WVZ6	Protein kinase C-binding protein 1	ZMYND8	ZMYND8;DKFZp564P1772	LNFDMTASPK	S401	1xPhospho [S8]	5.4174e+06	9.4735e+06	9.67321e+06	6.83942e+06	7.0675e+06	1.7692e+07	9.74071e+06	1.31248e+07	1.08772e+07	0	1.5333e+07	1.20085e+07	1.55227e+07	0	1.43532e+07	6.39553e+06	9.14095e+06	8.42677e+06	6.8446e+06	1.7778e+07	1.46785e+07	3.69703e+06	1.25127e+07	1.26402e+07	8.765e+06	1.15771e+07	1.3257e+07	1.97483e+07	1.41384e+07	9.90928e+06	1.03998e+07	9.04804e+06	0	1.32393e+07	1.84239e+07	1.79215e+07	1.52025e+07	1.0303e+07	1.47415e+07	8.09119e+06	1.6022e+07	4.5362e+06	1.06168e+07
A0A087WVZ6	Protein kinase C-binding protein 1	ZMYND8	ZMYND8;DKFZp564P1772	DKASPEPEKDFSEK	S663	1xPhospho [S4]	7.7098e+07	1.00883e+08	1.67602e+08	1.11615e+08	1.98893e+08	1.41366e+08	1.49072e+08	1.21121e+08	1.20765e+08	1.62211e+08	1.93901e+08	1.10638e+08	3.4597e+08	1.41464e+08	8.7977e+07	1.85419e+08	1.28591e+08	8.29793e+07	1.24419e+08	1.86934e+08	165380694	6.42964e+07	2.01356e+08	1.97571e+08	1.57035e+08	1.10387e+08	1.41649e+08	2.05347e+08	1.38098e+08	1.49973e+08	1.4625e+08	1.6472e+08	1.86274e+08	1.58947e+08	1.568e+08	1.32095e+08	131959151	1.59145e+08	1.04355e+08	1.88416e+08	226474803	3.58681e+08	2.02123e+08
A0A087WVZ6	Protein kinase C-binding protein 1	ZMYND8	ZMYND8;DKFZp564P1772	LNFDMTASPK	S401	1xPhospho [S8]; 1xOxidation [M5]	1.31157e+07	1.9901e+07	1.49873e+07	1.22361e+07	1.2774e+07	3.16843e+07	6.58586e+06	1.57928e+07	4.29791e+07	3.53778e+07	1.96786e+07	2.89681e+07	1.57985e+07	45778818	1.63996e+07	1.53898e+07	9.53205e+06	1.39355e+07	1.42666e+07	8.24797e+06	1.55461e+07	1.67284e+07	1.13371e+07	6.09257e+06	5.55301e+06	1.39775e+07	9.18503e+06	1.11939e+07	4.63488e+06	1.85114e+07	1.05255e+07	9.08111e+06	3.88232e+07	1.08141e+07	7.09391e+06	1.11512e+07	5.88194e+06	5.52778e+06	8.88485e+06	1.11424e+07	2.11481e+07	1.46572e+07	1.05218e+07
A0A087WVZ6	Protein kinase C-binding protein 1	ZMYND8	ZMYND8;DKFZp564P1772	ATSSHFSASEESMDFLDK	S455	1xPhospho [S7]; 1xOxidation [M13]	0	4.85693e+06	0	0	0	1.80455e+06	0	0	0	0	7.16319e+06	0	0	0	0	0	3.29744e+06	0	0	0	3.29334e+06	2.61503e+06	9.8879e+06	0	0	0	0	5.60459e+06	2.09463e+06	7.64817e+06	0	0	0	0	2.21064e+06	0	6.98788e+06	1.09538e+06	0	0	1.35056e+06	0	0
A0A087WVZ6	Protein kinase C-binding protein 1	ZMYND8	ZMYND8;DKFZp564P1772	TGQAGSLSGSPKPFSPQLSAPITTK	S483	3xPhospho [S8; S10; S]	190909	0	2.90883e+06	0	60639.1	0	863750	1.20673e+06	0	0	0	0	0	0	0	0	0	0	0	0	0	0	0	52022.6	0	0	0	1.61212e+06	0	0	42620.7	0	0	0	0	0	0	0	0	0	0	0	0
A0A087WVZ6	Protein kinase C-binding protein 1	ZMYND8	ZMYND8;DKFZp564P1772	TGQAGSLSGSPKPFSPQLSAPITTK	S485	3xPhospho [S8; S10; S]	190909	0	2.90883e+06	0	60639.1	0	863750	1.20673e+06	0	0	0	0	0	0	0	0	0	0	0	0	0	0	0	52022.6	0	0	0	1.61212e+06	0	0	42620.7	0	0	0	0	0	0	0	0	0	0	0	0
A0A087WVZ6	Protein kinase C-binding protein 1	ZMYND8	ZMYND8;DKFZp564P1772	SPMSTNSSVHTGSDVEQDAEKK	S439	1xPhospho [S13]	0	637440	0	0	0	0	0	593176	0	0	651519	0	1.19221e+07	0	0	1.21031e+06	0	1.24548e+06	1.88915e+06	0	0	3.84826e+06	0	604252	0	0	0	0	1.25286e+06	0	0	0	0	0	0	0	0	0	0	0	0	5.77544e+06	0
A0A087WVZ6	Protein kinase C-binding protein 1	ZMYND8	ZMYND8;DKFZp564P1772	RISLSDMPR	S420	1xPhospho [S3]	1.14899e+07	3.07982e+06	1.28586e+07	3.04524e+06	4.79703e+06	7.93208e+06	9.57637e+06	1.42089e+07	3.64381e+06	1.47085e+06	7.69911e+06	5.16303e+06	8.84915e+06	0	7.67072e+06	1.88947e+06	8.09578e+06	3.30237e+06	0	6.54711e+06	9.6761e+06	0	2.22565e+06	5.71191e+06	5.07223e+06	3.38799e+06	6.4689e+06	2.38128e+07	1.4652e+07	4.37233e+06	0	2.22737e+06	0	1.2965e+07	9.5398e+06	2.0545e+07	5.68556e+06	7.1548e+06	8.62647e+06	7.09149e+06	6.34887e+06	0	1.33914e+07
A0A087WVZ6	Protein kinase C-binding protein 1	ZMYND8	ZMYND8;DKFZp564P1772	ASPEPEKDFSEK	S663	1xPhospho [S2]	1.58376e+06	0	4.52229e+06	0	3.306e+06	0	1.67521e+06	1.60345e+06	0	0	0	0	1.87181e+06	0	0	2.18323e+06	0	1.80928e+06	0	2.09008e+06	0	0	2.88499e+06	1.23977e+06	2.04109e+06	0	0	0	1.58605e+06	0	0	0	0	0	0	0	2.34618e+06	0	0	3.92412e+06	2.47081e+06	3.29618e+06	2.07819e+06
A0A087WVZ6	Protein kinase C-binding protein 1	ZMYND8	ZMYND8;DKFZp564P1772	ELSESVQQQSTPVPLISPK	S542	2xPhospho [S17; S/T]	0	0	1.15459e+06	0	0	1.25801e+06	0	0	0	210671	2.49245e+06	0	0	0	0	139742	0	0	265935	0	0	0	0	0	67355.5	0	0	0	0	254863	0	0	0	0	0	0	0	0	0	0	0	0	0
A0A087WVZ6	Protein kinase C-binding protein 1	ZMYND8	ZMYND8;DKFZp564P1772	TPPSTTVGSHSPPETPVLTR	T746	2xPhospho [T6; T15]	0	0	4.94558e+06	0	0	0	0	0	0	0	1.46245e+06	0	2.16753e+06	0	2.13918e+06	0	1.11064e+06	0	0	0	0	0	0	0	0	0	1.24984e+06	0	0	0	0	0	0	0	0	3.29614e+06	2.28797e+06	1.21799e+06	1.47554e+06	0	0	0	0
A0A087WVZ6	Protein kinase C-binding protein 1	ZMYND8	ZMYND8;DKFZp564P1772	TPPSTTVGSHSPPETPVLTR	T755	2xPhospho [T6; T15]	0	0	4.94558e+06	0	0	0	0	0	0	0	1.46245e+06	0	2.16753e+06	0	2.13918e+06	0	1.11064e+06	0	0	0	0	0	0	0	0	0	1.24984e+06	0	0	0	0	0	0	0	0	3.29614e+06	2.28797e+06	1.21799e+06	1.47554e+06	0	0	0	0
A0A087WVZ6	Protein kinase C-binding protein 1	ZMYND8	ZMYND8;DKFZp564P1772	ELSESVQQQSTPVPLISPKR	S542	1xPhospho [S17]	0	0	3.82984e+06	0	0	3.57389e+06	0	1.42123e+06	0	0	868424	0	0	0	1.35784e+06	0	0	0	0	0	2.0948e+06	0	0	0	0	0	2.51127e+06	3.39975e+06	3.07142e+06	0	0	0	0	0	0	755928	0	2.28648e+06	3.96779e+06	0	0	0	0
A0A087WVZ6	Protein kinase C-binding protein 1	ZMYND8	ZMYND8;DKFZp564P1772	VKLNFDMTASPK	S401	1xPhospho [S10]; 1xOxidation [M7]	0	0	740889	0	0	2.10288e+06	998498	887758	0	0	1.52781e+06	0	1.60595e+06	0	0	0	0	0	0	881423	865509	0	0	0	1.22128e+06	0	1.16063e+06	0	0	960473	0	0	0	0	1.33874e+06	869445	0	0	3.39677e+06	0	0	0	0
A0A087WVZ6	Protein kinase C-binding protein 1	ZMYND8	ZMYND8;DKFZp564P1772	STSPASEKADPGAVK	S647	2xPhospho [S3; S6]	3.40838e+06	2.64171e+06	1.07029e+07	5.99816e+06	7.11732e+06	0	6.18753e+06	7.503e+06	0	0	1.09912e+07	6.71711e+06	2.13686e+07	0	0	9.66532e+06	4.59058e+06	7.85042e+06	2.58698e+06	1.15621e+07	9.62132e+06	0	4.34775e+06	3.64654e+06	4.61647e+06	6.97089e+06	6.69602e+06	1.33734e+07	6.84403e+06	3.91569e+06	7.82648e+06	9.76475e+06	0	3765839	6.98315e+06	5.20587e+06	6.93554e+06	6.11738e+06	2.70321e+06	3.24034e+06	4.28234e+06	1.08653e+07	7.75855e+06
A0A087WVZ6	Protein kinase C-binding protein 1	ZMYND8	ZMYND8;DKFZp564P1772	STSPASEKADPGAVK	S650	2xPhospho [S3; S6]	3.40838e+06	2.64171e+06	1.07029e+07	5.99816e+06	7.11732e+06	0	6.18753e+06	7.503e+06	0	0	1.09912e+07	6.71711e+06	2.13686e+07	0	0	9.66532e+06	4.59058e+06	7.85042e+06	2.58698e+06	1.15621e+07	9.62132e+06	0	4.34775e+06	3.64654e+06	4.61647e+06	6.97089e+06	6.69602e+06	1.33734e+07	6.84403e+06	3.91569e+06	7.82648e+06	9.76475e+06	0	3765839	6.98315e+06	5.20587e+06	6.93554e+06	6.11738e+06	2.70321e+06	3.24034e+06	4.28234e+06	1.08653e+07	7.75855e+06
A0A087WVZ6	Protein kinase C-binding protein 1	ZMYND8	ZMYND8;DKFZp564P1772	RISLSDMPR	S420	1xPhospho [S3]; 1xOxidation [M7]	2.19353e+07	2.64305e+07	2.69708e+07	2.12907e+07	3.08453e+07	2.1412e+07	2.67738e+07	4.05979e+07	2.30538e+07	2.9599e+07	3.31126e+07	1.54613e+07	2.93498e+07	2.8832e+07	2.4203e+07	2.51203e+07	2.98349e+07	1.59227e+07	1.21199e+07	2.99139e+07	3.76574e+07	6.66003e+06	2.99698e+07	24577333	2.2806e+07	2.65319e+07	3.34461e+07	4.05589e+07	2.09238e+07	2.74453e+07	2.1187e+07	2.24019e+07	3.54226e+07	5.01018e+07	3.89615e+07	2.71354e+07	5.09489e+07	3.03273e+07	3.15415e+07	2.53724e+07	4.12951e+07	3.99075e+07	2.58043e+07
A0A087WVZ6	Protein kinase C-binding protein 1	ZMYND8	ZMYND8;DKFZp564P1772	EPSPKQDVVGK	S732	1xPhospho [S3]	2.13e+06	3.81068e+06	2.13598e+06	2.02776e+06	2.77919e+06	5.36692e+06	2.25011e+06	1.34339e+06	0	2.77605e+06	2.44153e+06	0	3.5233e+06	0	4.64344e+06	2.9945e+06	2.34707e+06	3.13563e+06	3.66834e+06	4.31246e+06	4.75806e+06	3.80271e+06	4.46814e+06	3.93125e+06	3.82658e+06	3.54219e+06	2.20553e+06	4.07197e+06	2.06298e+06	2.68567e+06	4.60822e+06	4.03072e+06	0	1.28446e+06	3.53374e+06	2.62277e+06	1.31618e+06	3.80086e+06	4.06529e+06	0	0	5.62459e+06	2.21268e+06
A0A087WVZ6	Protein kinase C-binding protein 1	ZMYND8	ZMYND8;DKFZp564P1772	ATSSHFSASEESMDFLDK	S455	2xPhospho [S7; S9]	0	0	0	846465	0	3.15882e+06	0	0	0	0	1.00977e+06	0	90117.6	0	2.8663e+06	0	0	0	0	0	0	0	0	0	0	0	0	865014	0	0	0	0	0	149823	0	0	0	0	0	0	0	0	0
A0A087WVZ6	Protein kinase C-binding protein 1	ZMYND8	ZMYND8;DKFZp564P1772	ATSSHFSASEESMDFLDK	S457	2xPhospho [S7; S9]	0	0	0	846465	0	3.15882e+06	0	0	0	0	1.00977e+06	0	90117.6	0	2.8663e+06	0	0	0	0	0	0	0	0	0	0	0	0	865014	0	0	0	0	0	149823	0	0	0	0	0	0	0	0	0
Q5VZL5	Zinc finger MYM-type protein 4	ZMYM4	ZMYM4	VTQHESDNENEIQIQNK	S122	1xPhospho [S6]	3.66237e+07	5.27028e+07	5.33773e+07	4.42301e+07	4.91264e+07	3.94109e+07	3.49337e+07	4.56935e+07	1.69695e+07	3.81134e+07	5.21405e+07	2.05303e+07	7.08613e+07	2.65163e+07	4.33584e+07	5.9848e+07	3.05412e+07	3.28968e+07	3.0195e+07	8.45283e+07	4.68055e+07	1.90635e+07	8.30602e+07	5.78786e+07	3.56039e+07	4.70483e+07	4.39725e+07	4.48117e+07	4.09019e+07	4.05875e+07	8.00336e+07	4.84765e+07	3.77978e+07	4.85532e+07	3.7931e+07	3.76245e+07	4.82709e+07	4.89258e+07	3.48273e+07	5.90329e+07	6.9994e+07	53960626	5.83991e+07
Q5VZL5	Zinc finger MYM-type protein 4	ZMYM4	ZMYM4	AANQVEETLHTHLPQTPETNFR	T217	1xPhospho [T16]	0	0	1.68696e+07	0	1.18537e+06	1.52659e+07	0	2.1254e+06	0	0	7.4966e+06	3.50747e+06	0	0	0	0	0	0	0	1.71297e+06	1.22412e+07	0	6.01268e+06	1.27401e+06	0	645953	0	2.9588e+06	0	767178	806392	0	0	1.06256e+06	0	4.21307e+06	0	0	8.09578e+06	0	0	0	0
Q5VZL5	Zinc finger MYM-type protein 4	ZMYM4	ZMYM4	KKSIVAVEPR	S1181	1xPhospho [S3]	5.34924e+06	1.18866e+06	4.06022e+06	0	2.55396e+06	6.07491e+06	5.17049e+06	7.00965e+06	0	3.99244e+06	8.26646e+06	3.68503e+06	4.88395e+06	2.8378e+06	6.42631e+06	3.15556e+06	7.23731e+06	4.17956e+06	1.63383e+06	6.51222e+06	8.18438e+06	0	6.64253e+06	6.61165e+06	7.03394e+06	0	7.02938e+06	1.75105e+07	6.85206e+06	2.3338e+06	0	1.20353e+06	0	1.41489e+06	1.88755e+06	8.30403e+06	9.54734e+06	2.87516e+06	5.11431e+06	3.87286e+06	2.62088e+06	0	7.96589e+06
Q5VZL5	Zinc finger MYM-type protein 4	ZMYM4	ZMYM4	DNLVSSIHTDDSLEVER	T107	2xPhospho [T9; S12]	0	4.82471e+06	3.10977e+06	0	0	0	0	0	0	191229	0	0	0	0	0	0	63035	0	151598	7.14394e+06	0	0	3.52606e+06	910576	1.87871e+06	7.84023e+06	759410	1.29741e+06	0	0	4.23622e+06	0	0	0	0	0	1.22026e+06	0	1.9134e+06	0	0	0	593697
Q5VZL5	Zinc finger MYM-type protein 4	ZMYM4	ZMYM4	DNLVSSIHTDDSLEVER	S110	2xPhospho [T9; S12]	0	4.82471e+06	3.10977e+06	0	0	0	0	0	0	191229	0	0	0	0	0	0	63035	0	151598	7.14394e+06	0	0	3.52606e+06	910576	1.87871e+06	7.84023e+06	759410	1.29741e+06	0	0	4.23622e+06	0	0	0	0	0	1.22026e+06	0	1.9134e+06	0	0	0	593697
Q5VZL5	Zinc finger MYM-type protein 4	ZMYM4	ZMYM4	SIVAVEPR	S1181	1xPhospho [S1]	0	0	1.48473e+06	0	0	0	0	0	0	0	1.29623e+06	0	860660	0	0	0	0	0	0	860502	840268	0	1.17254e+06	596951	0	0	0	1.37749e+06	0	0	0	0	0	0	0	0	0	0	0	0	1.75468e+06	0	1.41686e+06
Q5VZL5	Zinc finger MYM-type protein 4	ZMYM4	ZMYM4	AKSEDSDVELSD	S1547	1xPhospho [S11]	0	0	1.59519e+06	3.98901e+06	2.95826e+06	2.71687e+06	1645985	1.07782e+06	1.52126e+06	0	1.97598e+06	0	6.7113e+06	0	2.2561e+06	0	0	1.34339e+06	3.00811e+06	6.68027e+06	1.07586e+06	2.3036e+06	3.75934e+06	0	0	2.20935e+06	1.9154e+06	3.6216e+06	0	0	5.39874e+06	3.58731e+06	0	1.50588e+06	1.34723e+06	1.65179e+06	1.35057e+06	0	0	2.78857e+06	2.30558e+06	0	1.87941e+06
Q14202	Zinc finger MYM-type protein 3	ZMYM3	ZMYM3	GWAPPGPSPSSGALDLLDTPAGLEK	S53	1xPhospho [S10]	0	0	1.31851e+06	0	0	0	0	0	0	0	0	0	0	0	0	0	70635.8	0	136710	0	47208.2	0	0	48888	0	0	0	0	0	0	44872.8	0	0	0	0	0	0	0	39421.2	0	0	0	0
Q14202	Zinc finger MYM-type protein 3	ZMYM3	ZMYM3	RAEPPKPEVVDSTESIPVSDEDSDAMVDDPNDEDFVPFRPR	S263	2xPhospho [S19; S23]; 1xOxidation [M26]	614788	0	733304	0	146289	190540	506098	0	408413	498008	0	0	0	173933	0	0	0	0	559913	174245	0	3.03942e+06	0	0	92521.1	196218	237608	2.7912e+06	0	0	0	69554.1	0	139063	869507	0	856233	87374.1	1.15062e+06	0	0	0	0
Q14202	Zinc finger MYM-type protein 3	ZMYM3	ZMYM3	RAEPPKPEVVDSTESIPVSDEDSDAMVDDPNDEDFVPFRPR	S267	2xPhospho [S19; S23]; 1xOxidation [M26]	614788	0	733304	0	146289	190540	506098	0	408413	498008	0	0	0	173933	0	0	0	0	559913	174245	0	3.03942e+06	0	0	92521.1	196218	237608	2.7912e+06	0	0	0	69554.1	0	139063	869507	0	856233	87374.1	1.15062e+06	0	0	0	0
Q14202	Zinc finger MYM-type protein 3	ZMYM3	ZMYM3	RAEPPKPEVVDSTESIPVSDEDSDAMVDDPNDEDFVPFRPR	S267	2xPhospho [S23; S/T]	4.70742e+06	0	790604	0	0	653921	393152	4.06086e+06	489001	0	64245.7	0	136024	0	0	462055	143946	90362	718664	71210.3	183193	0	426118	569886	345896	0	276280	1.74951e+07	418903	652631	225506	581795	0	871988	0	0	1.51363e+06	639307	0	0	0	0	0
Q14202	Zinc finger MYM-type protein 3	ZMYM3	ZMYM3	AEPPKPEVVDSTESIPVSDEDSDAMVDDPNDEDFVPFRPR	S263	2xPhospho [S18; S22]; 1xOxidation [M25]	825316	2.0219e+06	2.50603e+06	454777	281014	398227	0	0	299602	0	0	0	0	363006	992678	494484	970674	0	687480	373232	827803	1.3033e+06	0	572171	450879	582905	0	587268	187790	1.13628e+06	573250	142986	0	1.08846e+06	0	325243	623800	558576	352530	172522	114208	0	624213
Q14202	Zinc finger MYM-type protein 3	ZMYM3	ZMYM3	AEPPKPEVVDSTESIPVSDEDSDAMVDDPNDEDFVPFRPR	S267	2xPhospho [S18; S22]; 1xOxidation [M25]	825316	2.0219e+06	2.50603e+06	454777	281014	398227	0	0	299602	0	0	0	0	363006	992678	494484	970674	0	687480	373232	827803	1.3033e+06	0	572171	450879	582905	0	587268	187790	1.13628e+06	573250	142986	0	1.08846e+06	0	325243	623800	558576	352530	172522	114208	0	624213
Q14202	Zinc finger MYM-type protein 3	ZMYM3	ZMYM3	AEPPKPEVVDSTESIPVSDEDSDAMVDDPNDEDFVPFRPR	S263	2xPhospho [S18; S22]	350842	0	0	431699	334313	0	321889	128223	0	0	0	0	183968	0	376903	0	526824	188309	0	377191	308509	168332	362665	574046	0	790994	1.24511e+06	681327	1.79516e+06	287482	874807	336085	0	0	647996	497765	406451	837074	540853	0	378120	218540	990530
Q14202	Zinc finger MYM-type protein 3	ZMYM3	ZMYM3	AEPPKPEVVDSTESIPVSDEDSDAMVDDPNDEDFVPFRPR	S267	2xPhospho [S18; S22]	350842	0	0	431699	334313	0	321889	128223	0	0	0	0	183968	0	376903	0	526824	188309	0	377191	308509	168332	362665	574046	0	790994	1.24511e+06	681327	1.79516e+06	287482	874807	336085	0	0	647996	497765	406451	837074	540853	0	378120	218540	990530
Q14202	Zinc finger MYM-type protein 3	ZMYM3	ZMYM3	AEPPKPEVVDSTESIPVSDEDSDAMVDDPNDEDFVPFRPR	S263	1xPhospho [S18]; 1xOxidation [M25]	1.49703e+06	5.92829e+06	1.49102e+06	4.85702e+06	773243	718442	5.11294e+06	2.63419e+06	634156	1.31846e+06	1.05882e+06	232462	1.81067e+06	1.60438e+06	2.76234e+06	308583	519778	429214	629167	0	0	0	0	0	363647	205365	0	0	819566	0	0	302387	0	494248	0	494888	734221	361420	242472	0	0	1.2423e+06	0
Q14202	Zinc finger MYM-type protein 3	ZMYM3	ZMYM3	ASSDLCDLVSNQSAEGLLEDCDLFGPAR	S960	2xCarbamidomethyl [C6; C21]; 1xPhospho [S13]	0	0	0	0	0	0	0	0	0	0	96079.8	169008	0	0	0	0	248531	0	0	0	0	194527	91255.1	0	0	0	0	309502	0	235568	0	0	0	610660	0	0	0	0	65126.7	0	0	0	74123.3
Q14202	Zinc finger MYM-type protein 3	ZMYM3	ZMYM3	SAPTAPTPPPPPPPATPR	T817	2xPhospho [T7; T16]	0	0	972029	0	0	0	0	0	0	4.00439e+06	1.26736e+06	0	0	0	0	0	0	0	0	0	2.1648e+06	0	0	0	0	0	0	2.51565e+06	1.03246e+06	0	1.95616e+06	1.20489e+06	0	0	0	0	0	800605	0	2.54529e+06	0	0	695565
Q14202	Zinc finger MYM-type protein 3	ZMYM3	ZMYM3	SAPTAPTPPPPPPPATPR	T826	2xPhospho [T7; T16]	0	0	972029	0	0	0	0	0	0	4.00439e+06	1.26736e+06	0	0	0	0	0	0	0	0	0	2.1648e+06	0	0	0	0	0	0	2.51565e+06	1.03246e+06	0	1.95616e+06	1.20489e+06	0	0	0	0	0	800605	0	2.54529e+06	0	0	695565
Q14202	Zinc finger MYM-type protein 3	ZMYM3	ZMYM3	LCSDSCFSK	S433	2xCarbamidomethyl [C2; C6]; 1xPhospho [S3]	0	0	2.11573e+06	0	0	0	0	0	0	0	0	0	0	0	0	0	0	0	0	0	0	0	0	0	0	0	0	0	0	0	0	0	0	0	0	0	0	0	0	0	0	0	0
Q9UBW7	Zinc finger MYM-type protein 2	ZMYM2	ZMYM2	DIYDKDNYELDEDTD	T1376	1xPhospho [T14]	0	0	1.6036e+06	0	0	2.83816e+06	0	1.05523e+06	0	604476	0	0	0	0	1.41715e+06	0	0	0	1.4317e+06	1.94126e+06	0	0	1.16612e+06	820217	0	1.2247e+06	0	3.35047e+06	0	3.38573e+06	1.38246e+06	1.70598e+06	0	0	0	0	0	0	0	0	2.42828e+06	0	454117
Q8NF64	Zinc finger MIZ domain-containing protein 2	ZMIZ2	ZMIZ2;TRAFIP20	NFSSGTIPGTPGPNGEDGVEQTAIK	T580	1xPhospho [T10]	0	0	1.1976e+06	0	0	0	0	0	0	0	0	0	0	0	0	0	0	971041	0	0	0	0	0	0	0	0	0	0	0	0	0	0	0	0	0	1.83508e+06	0	0	0	0	0	0	0
Q9H898	Zinc finger matrin-type protein 4	ZMAT4	ZMAT4	TTATPLSPLKPPR	S121	1xPhospho [S7]	0	0	0	0	0	0	0	0	0	0	0	0	0	0	0	0	0	0	0	0	1.15813e+06	0	1.083e+06	0	0	0	985487	1.54283e+06	0	0	0	0	0	0	0	0	0	929460	0	0	0	0	0
R4GNG8	Zinc finger matrin-type protein 2 (Fragment)	ZMAT2	ZMAT2	LGKTIVITK	T64	1xPhospho [T4]	0	0	0	0	0	0	0	0	0	0	0	0	0	0	0	0	0	0	0	0	0	0	0	0	0	0	0	0	0	0	0	0	0	0	0	0	0	0	0	0	0	0	0
C9J6L6	Zinc finger protein with KRAB and SCAN domains 7	ZKSCAN7	ZNF167;ZKSCAN7	EVGEHPPLSSSPVEHEGVLK	S218	1xPhospho [S11]	0	1.36741e+06	0	1.16637e+06	2.56847e+06	0	2.52676e+06	0	1.37896e+06	0	452103	0	1.20413e+06	0	0	0	1.50788e+06	2.68845e+06	0	1.14211e+06	1.86504e+06	0	0	803310	1.89897e+06	1.50499e+06	1.00818e+06	1.75845e+06	1.00608e+06	0	957578	965392	0	0	3.09609e+06	0	2.36048e+06	2.21743e+06	0	0	1.7016e+06	0	1.51682e+06
P17029	Zinc finger protein with KRAB and SCAN domains 1	ZKSCAN1	ZKSCAN1;ZNF232;ZNF569	ALPAAHIPAPPHEGSPR	S208	1xPhospho [S15]	0	1.03836e+06	6.46274e+06	811468	1.93474e+06	2.30726e+06	4.92182e+06	1.9563e+06	4.00773e+06	4.41037e+06	1.91537e+06	2.10812e+06	4.01172e+06	0	3.14556e+06	3.30346e+06	0	3.95215e+06	0	2.84485e+06	7.5172e+06	0	2.25251e+06	6.01758e+06	2.1198e+06	3.78625e+06	4.08797e+06	6.92626e+06	3.31229e+06	1.73341e+06	1.60641e+06	3.58608e+06	0	4.7127e+06	1.02496e+07	2.1584e+06	1.63563e+06	8.18935e+06	4.62754e+06	0	3.35537e+06	2.25782e+06	4.19985e+06
P17029	Zinc finger protein with KRAB and SCAN domains 1	ZKSCAN1	ZKSCAN1;ZNF232;ZNF569	IHSGEKPYECNECGK	S456	2xCarbamidomethyl [C10; C13]; 1xPhospho [S3]	0	0	0	739609	0	0	0	0	0	0	0	0	0	0	0	0	0	0	0	0	0	0	0	160261	0	0	0	0	0	0	0	0	0	1.43137e+06	1.35969e+06	0	0	1.38773e+06	1.95759e+06	0	0	0	1.05939e+06
P17029	Zinc finger protein with KRAB and SCAN domains 1	ZKSCAN1	ZKSCAN1;ZNF232;ZNF569	SFSLSSNFTTPEEVPTGTK	S359	1xPhospho [S3]	219728	254617	586583	384525	0	0	0	1.07308e+06	0	0	72516.3	102243	92508.3	0	549891	0	0	0	0	0	148422	206303	0	0	0	197394	151915	2.21018e+06	88187.3	388700	0	0	0	805188	93018.4	0	0	0	0	0	0	0	0
P17029	Zinc finger protein with KRAB and SCAN domains 1	ZKSCAN1	ZKSCAN1;ZNF232;ZNF569	VEEEDEEDHMWGQDSTLQDTPPPDPEIFR	T47	1xPhospho [T20]	0	0	146652	0	0	288766	0	0	0	1.8972e+06	0	0	0	0	0	210149	0	481832	0	0	488556	0	0	0	0	186851	0	0	0	0	209812	0	0	0	0	140768	0	241292	0	132088	0	0	813674
P17029	Zinc finger protein with KRAB and SCAN domains 1	ZKSCAN1	ZKSCAN1;ZNF232;ZNF569	SFSLSSNFTTPEEVPTGTK	S359	2xPhospho [S3; S5]	217095	0	0	0	0	0	0	169207	0	0	0	0	0	0	269093	0	0	0	0	43244.5	0	279924	0	59628	0	0	0	0	0	0	0	0	0	0	0	0	0	253834	0	0	0	0	219440
P17029	Zinc finger protein with KRAB and SCAN domains 1	ZKSCAN1	ZKSCAN1;ZNF232;ZNF569	SFSLSSNFTTPEEVPTGTK	S361	2xPhospho [S3; S5]	217095	0	0	0	0	0	0	169207	0	0	0	0	0	0	269093	0	0	0	0	43244.5	0	279924	0	59628	0	0	0	0	0	0	0	0	0	0	0	0	0	253834	0	0	0	0	219440
Q9H4I2	Zinc fingers and homeoboxes protein 3	ZHX3	ZHX3	KAEENASQEEEEAAEDEGGEEDLASELR	S680	1xPhospho [S7]	4.00366e+06	1.13199e+07	5.11489e+06	6.73619e+06	1.66508e+07	6.49075e+06	6.58409e+06	9.2434e+06	1.03276e+07	2.17742e+06	1.29676e+07	8.9291e+06	6.79799e+06	413928	7.09092e+06	1.28298e+07	1.35634e+07	7.50691e+06	1.30412e+07	5.95535e+06	6.65525e+06	1.09527e+07	1.28809e+07	8.64302e+06	1.27274e+07	1.41218e+07	5.48843e+06	4.77242e+06	6.32352e+06	1.49432e+06	9.74783e+06	8.00404e+06	1.32064e+06	0	1.99791e+07	3.61183e+06	3.74455e+06	7.21871e+06	8.29897e+06	8.74916e+06	5.88213e+06	3.75367e+06	1.18603e+07
Q9H4I2	Zinc fingers and homeoboxes protein 3	ZHX3	ZHX3	QSWHQTPDFTPTK	T612	1xPhospho [T10]	0	0	1.01908e+06	0	0	0	0	679419	0	0	0	0	0	0	0	0	0	1.02491e+06	0	930756	0	0	0	0	0	1.14995e+06	1.51357e+06	2.46536e+06	798843	0	2.74105e+06	0	0	0	0	0	1.83902e+06	0	0	0	0	7.42613e+06	1.45277e+06
Q9Y6X8	Zinc fingers and homeoboxes protein 2	ZHX2	ZHX2	GIGTPQPDVAK	T37	1xPhospho [T4]	1.63337e+07	1.67463e+07	1.57403e+07	1.42319e+07	1.40883e+07	9.92995e+06	1.1197e+07	1.03239e+07	6.50025e+06	2.0386e+07	1.63469e+07	1.09173e+07	1.40049e+07	1.95461e+07	1.45633e+07	1.5716e+07	1.93291e+07	1.19681e+07	9.35757e+06	1.26128e+07	1.44634e+07	0	1.66653e+07	1.1339e+07	1.6947e+07	6.04233e+06	2.12626e+07	7.70831e+06	8.18007e+06	1.41671e+07	9.27945e+06	8.62731e+06	1.49239e+07	1.31286e+07	1.30368e+07	1.2068e+07	2.23177e+07	1.63858e+07	1.58784e+07	1.46015e+07	2.01788e+07	1.97151e+07	1.22225e+07
Q9UKY1	Zinc fingers and homeoboxes protein 1	ZHX1	ZHX1	EEAGETSPADESGAPK	S648	1xPhospho [S7]	0	0	0	0	0	0	0	0	0	0	1.38547e+06	0	2.96698e+06	0	0	0	0	0	0	0	0	0	0	2.93726e+06	0	0	0	1.58387e+06	0	0	0	0	0	0	0	0	0	0	0	0	0	0	1.27133e+06
Q9UKY1	Zinc fingers and homeoboxes protein 1	ZHX1	ZHX1	IAVHHNSVEDVPEEK	S202	1xPhospho [S7]	2.36214e+06	2.5123e+06	3.30214e+06	0	2.60258e+06	3.11292e+06	4.40463e+06	2.99082e+06	2.76914e+06	2.78416e+06	3.86554e+06	0	6.49365e+06	0	0	2.75875e+06	2.98231e+06	0	2.57189e+06	2.56574e+06	0	0	3.66221e+06	3.33928e+06	5.36143e+06	1.86347e+06	6.33e+06	2.4577e+06	0	3.89324e+06	2.98515e+06	2.4786e+06	0	0	3.71114e+06	3.0668e+06	3.30295e+06	0	0	0	0	0	3.94003e+06
Q8N5A5	Zinc finger CCCH-type with G patch domain-containing protein	ZGPAT	ZGPAT	GKSLDQCVETLQK	S373	1xCarbamidomethyl [C7]; 1xPhospho [S3]	1.82e+07	1.19783e+07	2.2347e+07	6.26591e+06	1.86018e+07	1.72706e+07	2.37974e+07	2.66976e+07	1.02948e+07	8.45697e+06	1.93831e+07	1.44396e+07	3.71615e+07	1.25211e+07	4.19326e+07	2.88943e+07	8.22021e+06	1.42934e+07	1.07561e+07	3.74594e+07	3.98661e+07	5.07937e+06	4.02127e+07	5.14838e+07	3.77143e+07	3.62535e+07	4.23072e+07	7.7507e+07	115370698	1.68885e+07	3.46273e+07	3.95733e+07	7.59509e+06	0	8.12184e+07	3.75133e+07	1.61237e+07	4.0608e+07	5.16758e+07	3.38696e+07	2.67391e+07	3.73079e+07	3.45973e+07
Q8N5A5	Zinc finger CCCH-type with G patch domain-containing protein	ZGPAT	ZGPAT	SLDQCVETLQK	S373	1xCarbamidomethyl [C5]; 1xPhospho [S1]	0	656580	0	0	0	0	992537	852122	0	995236	1.58045e+06	0	1.03975e+06	0	525984	0	0	0	0	720318	0	0	1.0404e+06	0	0	0	1.27808e+06	866679	519967	0	0	0	0	0	0	2.98615e+06	0	2.72917e+06	627862	5.21114e+06	0	0	0
Q5T4F4	Protrudin	ZFYVE27	ZFYVE27	EGSGPELSPSVMPEAPLESPPFPTK	S14	1xPhospho [S8]; 1xOxidation [M12]	0	0	95878.4	272841	55710.1	0	41745.5	0	0	0	50227.3	0	0	0	115481	0	0	0	0	0	86248	0	0	0	0	0	0	0	0	0	0	0	0	0	0	408689	0	99087	0	0	0	0	0
Q68DK2	Zinc finger FYVE domain-containing protein 26	ZFYVE26	ZFYVE26	SDSVIHLQEIVHQAADPETLPR	S1742	1xPhospho [S3]	0	2.33262e+06	187813	431630	0	201425	315560	175242	0	0	0	0	76669.4	0	447267	0	190183	127775	0	0	246175	0	165911	60053.4	0	105791	235622	3.60098e+06	0	0	166963	87511.3	0	0	0	0	784662	2.29106e+06	3.34214e+06	0	69303.4	0	48821.2
Q68DK2	Zinc finger FYVE domain-containing protein 26	ZFYVE26	ZFYVE26	SESPPYSFVVR	S1893	1xPhospho [S3]	0	471089	825023	198581	0	753685	1.51368e+06	1.83747e+06	2.75847e+06	0	983684	0	0	0	734318	0	0	0	0	0	0	0	0	0	0	0	0	1.19026e+06	1.16534e+06	0	0	0	0	0	1.59891e+06	1.00296e+06	897295	0	821038	0	0	0	1.11277e+06
Q68DK2	Zinc finger FYVE domain-containing protein 26	ZFYVE26	ZFYVE26	VSPDHLDPER	S297	1xPhospho [S2]	1.38216e+07	1.34778e+07	1.25139e+07	1.06517e+07	1.14769e+07	7.3564e+06	1.01946e+07	1.38578e+07	1.87196e+07	1.01632e+07	1.03339e+07	1.12317e+07	1.06848e+07	1.36242e+07	5.73379e+06	1.36468e+07	15999372	1.00885e+07	16458522	1.05753e+07	1.1886e+07	2.82342e+06	1.59887e+07	9.57455e+06	1.14306e+07	8.87797e+06	1.80123e+07	7.3391e+06	1.27548e+07	1.07537e+07	1.43787e+07	1.55806e+07	0	2.4631e+07	2.51485e+07	9.64442e+06	1.42633e+07	1.00438e+07	7.44801e+06	1.20976e+07	1.85982e+07	1.3439e+07	1.35451e+07
Q68DK2	Zinc finger FYVE domain-containing protein 26	ZFYVE26	ZFYVE26	AEPKDSYPGPHR	S656	1xPhospho [S6]	0	2.53665e+06	0	2.34385e+06	0	0	0	0	0	0	0	0	0	0	0	0	2.8832e+06	0	3.71983e+06	915033	0	0	0	0	0	2.7137e+06	1.09142e+06	0	1.74068e+06	3.90183e+06	1.97001e+06	2.06928e+06	0	0	1.82596e+06	4.00485e+06	0	794243	0	0	0	0	0
Q68DK2	Zinc finger FYVE domain-containing protein 26	ZFYVE26	ZFYVE26	RESWTPR	S144	1xPhospho [S3]	2.30666e+07	2.36839e+07	1.27712e+07	1.27213e+07	3.20564e+07	1.81956e+07	4.21523e+07	6.01685e+07	2.7278e+07	4.69792e+07	5.10325e+07	5.00983e+07	31553535	9.42155e+07	1.19935e+07	6.04944e+07	6.58095e+07	1.99345e+07	3.14149e+07	3.74439e+07	2.91673e+07	1.21364e+07	6.73829e+07	1.89503e+07	5.2929e+07	1.8318e+07	8.25517e+07	3.2938e+07	2.90056e+07	3.58757e+07	5.0434e+07	5.0947e+07	9.51963e+07	3.70578e+07	6.02078e+07	3.06418e+07	5.74642e+07	4.26702e+07	8.51795e+07	6.88759e+07	6.68689e+07	6.44783e+07	4.88579e+07
Q68DK2	Zinc finger FYVE domain-containing protein 26	ZFYVE26	ZFYVE26	GSNPSLESTSSELSTSTSEGSLSAMSGRNELHSR	S815	1xPhospho [S33]; 1xOxidation [M25]	4.06309e+06	0	0	0	0	2.51504e+06	2.13466e+06	0	0	7.09081e+06	0	6.33168e+06	0	6.21296e+06	0	0	0	0	0	0	0	0	0	0	3.97079e+06	0	2.85999e+06	0	0	0	0	0	0	1.96711e+06	0	0	0	0	2.94343e+06	0	0	0	0
Q68DK2	Zinc finger FYVE domain-containing protein 26	ZFYVE26	ZFYVE26	GSNPSLESTSSELSTSTSEGSLSAMSGRNELHSR	S815	1xPhospho [S33]	6.57137e+06	0	0	1.87241e+06	1.05514e+07	0	1.51137e+06	0	9.68325e+06	2.72216e+07	1.07973e+07	2.52166e+07	0	4.46076e+07	0	1.8514e+06	9.97361e+06	1.29262e+06	1.3951e+07	890599	0	0	0	0	4.7436e+06	0	0	0	4.80576e+06	7.11306e+06	0	0	0	1.85844e+06	0	0	2.81431e+06	3.38117e+06	2.08888e+06	0	0	0	896918
H3BRF9	Abscission/NoCut checkpoint regulator	ZFYVE19	ZFYVE19	QGSIPSTQEMEAR	S190	1xPhospho [S3]	2.25744e+07	8.49308e+06	9.49316e+06	1.87118e+06	3.08727e+06	2.94711e+06	6.67942e+06	1.3085e+07	5.8796e+06	4.187e+06	9.60652e+06	2.62373e+06	2.97908e+06	2.54758e+06	9.59077e+06	6.03693e+06	6.84891e+06	5.07327e+06	4.064e+06	7.50061e+06	4.93954e+06	2.84497e+06	1.2774e+07	8.08491e+06	4.48576e+06	7.9043e+06	8.55009e+06	1.25173e+07	3.08629e+06	6.98581e+06	1.46244e+07	7.67609e+06	3.2471e+06	8.35541e+06	3.58948e+06	1.81423e+07	9.96462e+06	9.5234e+06	1.27159e+07	7.94875e+06	7.93759e+06	2.62497e+07	1.40632e+07
H3BRF9	Abscission/NoCut checkpoint regulator	ZFYVE19	ZFYVE19	WSPPQNYK	S121	1xPhospho [S2]	6.14792e+07	1.28601e+08	4.88409e+07	6.18757e+07	9.12001e+07	7.546e+07	1.24717e+08	1.23335e+08	131511413	1.06564e+08	9.74259e+07	5.01625e+07	5.77613e+07	8.87243e+07	7.36233e+07	1.56636e+08	7.30247e+07	8.26964e+07	7.20555e+07	9.8958e+07	1.04433e+08	6.96365e+07	1.03811e+08	100176064	7.23128e+07	1.10629e+08	8.77243e+07	8.83837e+07	9.16562e+07	9.05907e+07	1.23908e+08	8.34353e+07	1.44447e+08	1.19052e+08	6.47873e+07	1.00616e+08	7.96786e+07	8.71286e+07	8.55025e+07	8.29863e+07	4.85713e+07	3.23293e+08	8.21513e+07
H3BRF9	Abscission/NoCut checkpoint regulator	ZFYVE19	ZFYVE19	GSSANASKWSPPQNYK	S121	1xPhospho [S10]	0	0	0	1.29449e+07	0	0	0	1.1983e+07	0	0	0	0	0	0	0	0	0	0	0	0	0	0	0	0	0	2.19008e+07	0	1.02776e+07	2.39121e+07	0	0	0	0	0	0	0	0	0	5.13446e+06	9.05208e+06	0	0	0
H3BRF9	Abscission/NoCut checkpoint regulator	ZFYVE19	ZFYVE19	WSPPQNYKK	S121	1xPhospho [S2]	0	0	0	0	2.91698e+06	2.85071e+06	6.12225e+06	2.93795e+06	3.20091e+06	3.39643e+06	499084	3.74007e+06	0	0	4.34906e+06	0	0	0	0	2.46949e+06	471717	0	591046	2.51071e+06	671886	0	2.8311e+06	0	736789	0	727064	0	0	1.12541e+07	7.53731e+06	2.56501e+06	0	2.97408e+06	6.14724e+06	0	3.90563e+06	1.00797e+07	5.88413e+06
H3BRF9	Abscission/NoCut checkpoint regulator	ZFYVE19	ZFYVE19	QANWSLEEEK	S277	1xPhospho [S5]	5.61073e+06	4.34955e+06	6.95686e+06	3.05846e+06	2.43686e+06	7.81776e+06	3.73337e+06	2.12986e+06	4.44451e+06	1.62011e+06	3.20952e+06	1.68751e+06	2.04553e+06	0	3.3507e+06	3.55911e+06	881237	1.27488e+06	2.09868e+06	2.80812e+06	2.31833e+06	7.1932e+06	2.26424e+06	1.34628e+06	0	922587	7.06591e+06	0	2.40119e+06	1.9851e+06	3.90259e+06	0	0	0	0	4.26195e+06	3.12141e+06	3.86035e+06	3.89586e+06	1.68737e+06	0	0	0
A0A024RAL3	Zinc finger FYVE domain-containing protein	ZFYVE16	ZFYVE16	SNADSLIGLDLSSVSDTPCVSSTDHDSDTVR	S160	1xCarbamidomethyl [C19]; 1xPhospho [S5]	0	0	0	4.83041e+06	0	100199	200676	237457	0	706045	0	0	0	0	0	0	0	189915	277314	109340	0	0	181852	141610	1.00723e+06	67563.1	333085	322007	347132	441594	0	509614	0	506355	1.57808e+06	593542	48208.6	503800	152362	0	104170	0	54935.8
A0A024RAL3	Zinc finger FYVE domain-containing protein	ZFYVE16	ZFYVE16	RCSEDFSPLSPDVPMTVNTVDHSHSTTVEKPNNETGDITR	S896	1xCarbamidomethyl [C2]; 1xPhospho [S3]; 1xOxidation [M15]	0	0	791484	0	0	0	707799	888972	0	0	0	0	0	0	0	0	0	0	0	0	0	0	639380	0	0	0	0	0	0	0	0	0	0	0	0	0	0	0	0	0	0	0	0
A0A024RAL3	Zinc finger FYVE domain-containing protein	ZFYVE16	ZFYVE16	MMSPTGSNLK	S815	1xPhospho [S3]; 2xOxidation [M1; M2]	0	0	708680	0	0	0	0	0	0	0	0	0	0	0	0	0	0	0	3.11392e+06	0	0	0	0	0	0	0	0	0	0	0	0	0	0	0	0	0	0	0	0	0	0	0	0
A0A024RAL3	Zinc finger FYVE domain-containing protein	ZFYVE16	ZFYVE16	NEIIQSPISQVPSVEK	S942	2xPhospho [S9; S]	795354	1.30112e+06	2.7951e+06	1.6254e+06	94750.4	0	4.46299e+06	5.29671e+06	0	211158	5.92151e+06	0	0	0	3.93283e+06	186390	140759	591503	266881	45399.8	1.04844e+06	0	51273.9	0	237556	99325.6	1.03882e+06	3.12878e+06	3.50704e+06	0	221470	0	0	220999	2.27617e+06	639163	2.57865e+06	195645	2.69593e+06	0	0	0	1.20798e+06
A0A024RAL3	Zinc finger FYVE domain-containing protein	ZFYVE16	ZFYVE16	GLTSIQNEK	S90	1xPhospho [S4]	0	0	0	0	0	0	0	0	0	0	0	0	0	0	0	1.40367e+06	2.12395e+06	785736	0	1.7259e+06	747337	0	724945	0	0	699609	2.07744e+06	0	0	0	1.21215e+06	0	0	0	0	0	0	0	0	0	0	0	0
B2RNR6	Zinc finger RNA binding protein	ZFR	ZFR	RDSDGVDGFEAEGKK	S1054	1xPhospho [S3]	1.9953e+07	3.5074e+07	4.28353e+07	3.75156e+07	3.51838e+07	2.19731e+07	4.12876e+07	3.69647e+07	1.42988e+07	3.00794e+07	4.82152e+07	2.43492e+07	5.33796e+07	2.21948e+07	1.89255e+07	3.52554e+07	2.07446e+07	1.89673e+07	1.68571e+07	4.31851e+07	3.06482e+07	2.14517e+07	3.78871e+07	2.83369e+07	3.33431e+07	3.5704e+07	3.00367e+07	4.10407e+07	3.28918e+07	3.19854e+07	4.51064e+07	3.63103e+07	2.39176e+07	2.63376e+07	3.0322e+07	2.24528e+07	3.04321e+07	3.23161e+07	2.5993e+07	3.46604e+07	3.28144e+07	5.37764e+07	4.52493e+07
B2RNR6	Zinc finger RNA binding protein	ZFR	ZFR	RDSDGVDGFEAEGK	S1054	1xPhospho [S3]	2.92588e+07	3.33533e+07	8.01346e+07	4.21664e+07	3.53706e+07	8.87203e+06	4.19835e+07	5.00105e+07	9.36954e+06	3.04037e+07	5.78655e+07	2.12272e+07	5.69265e+07	4.98199e+06	2.39297e+07	3.68075e+07	2.44902e+07	3.27539e+07	1.68152e+07	5.03282e+07	3.74423e+07	1.56803e+07	4.42656e+07	4.20432e+07	3.29668e+07	5.23279e+07	3.55945e+07	5.05206e+07	4.5601e+07	3.03546e+07	6.1106e+07	5.43425e+07	1.09289e+07	2.77847e+07	2.72323e+07	2.669e+07	6.60967e+07	4.46953e+07	1.93872e+07	4.65864e+07	2.20701e+07	6.38683e+07	6.65438e+07
B2RNR6	Zinc finger RNA binding protein	ZFR	ZFR	RRDSDGVDGFEAEGK	S1054	1xPhospho [S4]	3.85841e+08	7.37097e+08	4.3256e+08	6.55352e+08	5.04952e+08	2.73842e+08	5.70661e+08	2.7308e+08	1.74613e+08	5.30941e+08	6.41082e+08	2.56773e+08	5.76164e+08	2.67943e+08	618052015	1082530812	2.97348e+08	3.55258e+08	4.49719e+08	2.05061e+08	1.5272e+08	1.06317e+08	4.54344e+08	1.47076e+08	1032254536	2.61686e+08	6.06529e+08	1.57679e+08	2.08436e+08	3.78744e+08	8.27753e+08	3.97531e+08	429644768	228561455	2.29983e+08	239450293	2.89867e+08	5.05579e+08	7.23441e+08	4.42155e+08	4.17888e+08	1111515200	6.87171e+08
B2RNR6	Zinc finger RNA binding protein	ZFR	ZFR	DSDGVDGFEAEGK	S1054	1xPhospho [S2]	0	886347	0	0	0	0	808561	0	0	0	0	0	0	0	0	0	1.12732e+06	1.57798e+06	0	1.95597e+06	0	4.49287e+06	0	1.15966e+06	0	1.71121e+06	619070	1.54623e+06	790642	0	1.26368e+06	967960	0	0	0	437403	0	0	0	0	0	0	530167
Q8WW38	Zinc finger protein ZFPM2	ZFPM2	ZFPM2	RPLEDAIEDEEEECPSEETDIISK	S29	1xCarbamidomethyl [C14]; 1xPhospho [S16]	0	0	2.15902e+06	0	0	0	0	2.19552e+06	0	0	1.85849e+06	0	0	0	0	0	0	0	156406	0	810602	0	0	0	0	0	0	0	0	0	0	0	0	0	0	0	0	0	0	0	0	0	0
Q8WW38	Zinc finger protein ZFPM2	ZFPM2	ZFPM2	DASSDTELDKCEK	S434	1xCarbamidomethyl [C11]; 1xPhospho [S4]	2.98302e+06	1.82908e+06	6.41365e+06	6.12097e+06	3.67812e+06	2.48424e+06	4.51524e+06	2.31932e+06	4.2522e+06	5.8824e+06	2.29855e+06	0	0	0	1.2846e+06	4.2223e+06	2.58762e+06	2.98315e+06	3.70809e+06	2.47371e+06	3.69329e+06	0	3.29147e+06	4.93598e+06	3.9386e+06	6.22785e+06	3.52184e+06	2.07293e+06	1.11356e+06	4.46686e+06	5.93613e+06	0	9.74807e+06	0	0	0	0	0	0	8.95403e+06	0	6.82826e+06	0
Q8WW38	Zinc finger protein ZFPM2	ZFPM2	ZFPM2	SPEFPSVSEK	S581	1xPhospho [S1]	683414	662478	589420	0	0	0	1.03555e+06	732321	0	0	858831	0	0	0	0	1.22486e+06	0	561659	1.12242e+06	0	848264	0	0	1.6431e+06	1.12206e+06	0	712841	0	0	1.3064e+06	0	0	0	1.24421e+06	0	0	0	0	0	0	0	0	997858
Q8IX07	Zinc finger protein ZFPM1	ZFPM1	ZFPM1	SPGPAADGPIDLSK	S786	1xPhospho [S1]	1.47103e+06	2.49164e+06	1.19245e+06	2.44387e+06	3.14712e+06	0	817190	1.84041e+06	4.71805e+06	0	698978	3.77492e+06	0	0	784107	2.24459e+06	6.7532e+06	0	4.022e+06	1.86072e+06	0	0	0	0	969613	0	1.8221e+06	2.03383e+06	624212	6.86545e+06	0	0	0	0	0	893834	0	491805	647451	0	1.99008e+06	0	0
Q8IX07	Zinc finger protein ZFPM1	ZFPM1	ZFPM1	GPSPAPAPAASPQPGSR	S901	2xPhospho [S3; S11]	0	0	0	0	0	0	0	0	2.70163e+06	0	0	0	0	0	0	0	0	0	0	0	0	0	0	0	0	0	0	0	0	0	0	0	0	0	0	0	0	0	0	0	0	0	0
Q8IX07	Zinc finger protein ZFPM1	ZFPM1	ZFPM1	GPSPAPAPAASPQPGSR	S909	2xPhospho [S3; S11]	0	0	0	0	0	0	0	0	2.70163e+06	0	0	0	0	0	0	0	0	0	0	0	0	0	0	0	0	0	0	0	0	0	0	0	0	0	0	0	0	0	0	0	0	0	0
Q8IX07	Zinc finger protein ZFPM1	ZFPM1	ZFPM1	APPGQPAEPDAPRSSPGPGAR	S637	1xPhospho [S14]	139019878	28196713	3.21867e+07	9.35635e+06	2.56921e+07	2.36728e+07	3.59579e+07	9.90202e+07	4.51737e+07	1.94814e+07	34006944	9.42433e+07	5.14423e+07	6.98808e+07	5.82941e+07	1.61073e+07	1.03726e+08	5.36128e+07	4.55992e+07	1.16558e+08	6.42334e+07	2.10817e+07	3.06194e+07	1.55025e+08	9.99214e+07	7.12981e+07	1.12283e+08	8.30743e+07	1.6589e+08	7.85394e+07	2.60366e+07	1.32868e+08	2.83492e+07	271435865	1.85681e+08	4.89593e+08	5.20045e+07	1.65706e+08	1.15231e+08	8.45839e+07	1.18223e+08	0	1.26008e+08
Q8TF47	Zinc finger protein 90 homolog	ZFP90	ZFP90	STSFIEHHR	S511	1xPhospho [S3]	0	1.22971e+06	864265	1.37529e+06	3.05844e+06	5.04488e+06	3.37638e+06	2.4978e+06	0	0	3.15203e+06	0	2.21149e+06	0	1.71483e+06	4.05733e+06	1.78535e+06	2.63573e+06	4.15322e+06	7.52743e+06	3.37756e+06	0	5.63593e+06	1.06048e+07	2.92707e+06	0	3.19248e+06	3.23557e+06	5.61214e+06	1.01065e+06	906633	1.36866e+06	0	1.78014e+06	0	684813	3.28835e+06	2.80487e+06	761789	0	0	0	2.09639e+06
D6RCF6	Zinc finger protein 62 homolog (Fragment)	ZFP62	ZFP62	SLHLSPQHITHQTMPIGQR	S64	1xPhospho [S5]	0	0	0	0	0	0	0	0	0	0	0	0	0	0	0	0	0	0	0	0	0	0	0	0	0	0	0	0	0	0	0	0	0	0	0	0	0	0	0	0	0	0	0
P47974	mRNA decay activator protein ZFP36L2	ZFP36L2	ZFP36L1;ZFP36L2	SQQQQQQQGLAPPAQPPAPPSATLPAGAAAPPSPPFSFQLPR	S426	1xPhospho [S33]	0	0	0	0	0	0	443512	84679.4	0	160405	0	0	0	0	0	531612	0	0	155984	0	754264	0	197909	501923	131161	0	0	0	0	137804	0	0	0	0	0	423009	252243	0	1.67985e+06	0	0	0	393201
P47974	mRNA decay activator protein ZFP36L2	ZFP36L2	ZFP36L1;ZFP36L2	RLSDSPVFDAPPSPPDSLSDR	S438	1xPhospho [S3]	0	715179	1.01009e+06	0	0	0	1.11787e+06	1.50443e+06	0	0	795642	0	0	0	485902	0	0	0	0	0	7.25216e+06	0	0	1.9792e+06	0	0	1.42912e+06	2.2314e+06	2.92561e+06	0	48358.6	0	0	95263.3	0	2.44665e+06	1.35559e+06	118604	1.00292e+06	0	0	0	406357
P47974	mRNA decay activator protein ZFP36L2	ZFP36L2	ZFP36L1;ZFP36L2	RLSDSPVFDAPPSPPDSLSDR	S440	2xPhospho [S5; S13]	0	520361	3.83084e+06	385411	0	0	2.54364e+06	3.66925e+06	1.8409e+06	0	2.303e+06	0	0	0	1.02383e+06	0	127323	0	0	0	0	0	0	0	0	0	0	1.33765e+06	0	0	0	0	0	0	1.78534e+06	6.40604e+06	2.07335e+06	0	1.65696e+06	0	0	0	5.50942e+06
P47974	mRNA decay activator protein ZFP36L2	ZFP36L2	ZFP36L1;ZFP36L2	RLSDSPVFDAPPSPPDSLSDR	S448	2xPhospho [S5; S13]	0	520361	3.83084e+06	385411	0	0	2.54364e+06	3.66925e+06	1.8409e+06	0	2.303e+06	0	0	0	1.02383e+06	0	127323	0	0	0	0	0	0	0	0	0	0	1.33765e+06	0	0	0	0	0	0	1.78534e+06	6.40604e+06	2.07335e+06	0	1.65696e+06	0	0	0	5.50942e+06
P47974	mRNA decay activator protein ZFP36L2	ZFP36L2	ZFP36L1;ZFP36L2	SFSENGDR	S125	1xPhospho [S3]	0	0	831868	0	0	508308	1.20078e+06	0	0	0	1.83993e+06	0	0	0	0	6.12667e+06	5.99913e+06	6.14344e+06	4.92028e+06	1.83815e+06	0	1.84186e+06	0	0	1.02734e+06	0	4.13125e+06	0	0	3.97375e+06	2.21527e+06	2.25347e+06	0	0	1.95035e+06	0	0	0	0	0	0	0	933376
M0QY76	Zinc finger protein 36, C3H type, homolog (Mouse), isoform CRA_a	ZFP36	ZFP36	LGPELSPSPTSPTATSTTPSR	S96	2xPhospho [S/T]	5.27217e+06	1.59158e+06	3.02214e+06	7.74642e+06	2.10224e+06	8.7108e+06	0	3.42203e+06	8.72739e+06	508327	1.33962e+06	6.82194e+06	66445.4	1.6474e+06	6.2981e+06	0	4.55597e+06	5.25096e+06	1.61308e+06	1.86426e+06	2.84533e+06	2.21038e+06	1.43084e+06	1.45036e+06	4.78364e+06	0	5.54098e+06	6.96469e+06	1.35107e+06	1.4628e+07	1.1525e+07	1.4958e+06	1.43429e+06	0	4.43785e+06	9.82322e+06	2.97659e+06	1.42606e+07	8.66574e+06	0	0	0	0
M0QY76	Zinc finger protein 36, C3H type, homolog (Mouse), isoform CRA_a	ZFP36	ZFP36	STSLVEGR	S66	1xPhospho [S3]	2.5962e+06	5.12311e+06	7.18094e+06	5.12048e+06	2.44376e+06	2.17878e+06	2.05827e+06	3.61955e+06	4.79941e+06	6.97814e+06	3.13901e+06	1.15695e+07	0	9.57039e+06	2.58669e+06	3.06813e+06	1.27577e+07	3.99463e+06	2.41552e+06	2.07963e+06	7.05359e+06	1.8281e+06	1.95194e+06	1.61472e+06	3.59002e+06	1.40213e+06	4.89793e+06	1.79168e+06	4.25457e+06	5.70617e+07	1.80631e+06	1.88725e+06	5.94186e+07	1.88827e+06	2.83443e+06	4.23251e+06	3.61693e+06	9.1508e+06	2.16943e+06	0	0	4.11716e+06	3.53534e+06
Q96NJ6	Zinc finger protein 3 homolog	ZFP3	ZFP3	ESMEEVIEQMSPQER	S63	1xPhospho [S11]	0	0	0	0	0	1.48626e+06	0	0	0	147758	0	0	143034	0	0	0	0	0	0	0	0	0	0	31320.4	0	0	0	0	0	0	0	0	0	0	0	0	0	0	0	0	1.55823e+06	0	766303
E5RI93	Zinc finger homeobox protein 4 (Fragment)	ZFHX4	ZFHX4;ZFHX3	DSGIITPEKELK	T1174	1xPhospho [T6]	0	0	0	0	0	0	0	0	0	0	0	2.4952e+06	0	0	0	0	0	0	0	535506	605759	0	922252	0	0	0	0	1.05596e+06	0	0	0	0	0	0	0	2.12961e+06	781451	0	0	1.54664e+06	0	5.24811e+06	0
Q15911	Zinc finger homeobox protein 3	ZFHX3	ZFHX4;ZFHX3	ASQTPVPPGAPSPDKDPAK	S3409	1xPhospho [S12]	8.64521e+06	2.70989e+07	2.53765e+06	9.62261e+06	8.40368e+06	7.70779e+06	2.48192e+06	3.07955e+06	9.98525e+06	4.43191e+06	6.16843e+06	6.16838e+06	4.95575e+06	3.12814e+07	4.19141e+06	5.33361e+06	6.57573e+06	6.16317e+06	1.45498e+07	8.13807e+06	4.53906e+06	9.9385e+06	6.41462e+06	1.37252e+07	7.2119e+06	8.75176e+06	1.63656e+07	6.22885e+06	5.91542e+06	3.95962e+06	3.75839e+06	1.08279e+07	0	1.44565e+07	1.22221e+07	1.62666e+06	2.96236e+06	2.43166e+07	1.16391e+07	0	2.49538e+06	0	4.81517e+06
Q15911	Zinc finger homeobox protein 3	ZFHX3	ZFHX4;ZFHX3	ASQTPVPPGAPSPDKDPAKESPKPEEQK	S3409	2xPhospho [S12; S21]	0	0	2.79705e+06	0	0	2.21121e+06	3.73436e+06	3.36811e+06	5.11039e+06	0	0	0	4.70771e+06	0	0	0	0	0	0	0	0	2.28311e+06	1.74246e+06	9.23205e+06	0	3.34124e+06	0	5.72099e+06	0	3.82552e+06	3.22623e+06	3.44532e+06	0	0	0	2.60468e+06	2.87538e+06	0	0	7.38415e+06	7.1576e+06	4.73346e+06	6.12236e+06
Q15911	Zinc finger homeobox protein 3	ZFHX3	ZFHX4;ZFHX3	ASQTPVPPGAPSPDKDPAKESPKPEEQK	S3418	2xPhospho [S12; S21]	0	0	2.79705e+06	0	0	2.21121e+06	3.73436e+06	3.36811e+06	5.11039e+06	0	0	0	4.70771e+06	0	0	0	0	0	0	0	0	2.28311e+06	1.74246e+06	9.23205e+06	0	3.34124e+06	0	5.72099e+06	0	3.82552e+06	3.22623e+06	3.44532e+06	0	0	0	2.60468e+06	2.87538e+06	0	0	7.38415e+06	7.1576e+06	4.73346e+06	6.12236e+06
Q15911	Zinc finger homeobox protein 3	ZFHX3	ZFHX4;ZFHX3	TLLSPSSIK	S2801	1xPhospho [S4]	0	0	2.0454e+06	0	1.25138e+06	1.44521e+06	1.60217e+06	2.55135e+06	1.39068e+06	0	1.35272e+06	2.32824e+06	0	0	2.47748e+06	0	0	1.40698e+06	0	4.7764e+06	1.8547e+06	0	1.71245e+06	2.16853e+06	3.96947e+06	1.23683e+06	5.34444e+06	5.28995e+06	2.42377e+06	3.10484e+06	1.2554e+06	929431	0	1.17073e+06	0	0	3.22974e+06	2.49557e+06	2.16752e+06	2.19905e+06	2.10776e+06	0	2.41925e+06
Q15911	Zinc finger homeobox protein 3	ZFHX3	ZFHX4;ZFHX3	LSSGLVSPAPSFYSK	S2896	1xPhospho [S7]	0	549154	1.23655e+06	389420	636666	1.53724e+06	1.0794e+06	1.16568e+06	693432	0	1.05995e+06	0	0	0	1.2196e+06	0	0	0	140204	0	657441	0	0	614961	0	0	370586	2.97492e+06	3.61101e+06	0	0	0	0	0	0	1.84227e+06	714392	0	2.16158e+06	0	1.48896e+06	0	491691
Q15911	Zinc finger homeobox protein 3	ZFHX3	ZFHX4;ZFHX3	NRLSFNSEGVR	S571	1xPhospho [S4]	0	1.09595e+06	4.77658e+06	0	2.45326e+06	1.30183e+06	2.58965e+06	4.57546e+06	0	3.62994e+06	3.50056e+06	0	0	0	3.74556e+06	2.04086e+06	3.6538e+06	0	0	6.61271e+06	2.12119e+06	0	1.99023e+06	4.92488e+06	6.79238e+06	1.70939e+06	1.0859e+07	6.59891e+06	5.22083e+06	0	0	0	3.94405e+06	0	1.78657e+06	1.84218e+06	3.6853e+06	2.64312e+06	5.43569e+06	0	0	0	0
Q15911	Zinc finger homeobox protein 3	ZFHX3	ZFHX4;ZFHX3	TMELSPR	S2795	1xPhospho [S5]	8.89372e+06	6.03838e+06	6.82427e+06	3.18247e+06	1.94146e+06	2.39886e+06	1.64048e+06	4.63675e+06	0	3.2362e+06	4.73489e+06	4.57859e+06	2.14006e+06	5.1379e+06	8.79118e+06	2.974e+06	2.04643e+06	4.98572e+06	6.62427e+06	9.83876e+06	5.87952e+06	6.26303e+06	6.3135e+06	6.99593e+06	4.39286e+06	9.72904e+06	9.53874e+06	1.15078e+07	5.43557e+06	7.87759e+06	1.23174e+07	9.19138e+06	1.07224e+07	1.16452e+07	4.36155e+06	7.09303e+06	5.52948e+06	8.7717e+06	8.60387e+06	1.48626e+06	1.52825e+06	2.66156e+06	2.68408e+06
Q15911	Zinc finger homeobox protein 3	ZFHX3	ZFHX4;ZFHX3	TMELSPR	S2795	1xPhospho [S5]; 1xOxidation [M2]	0	2.6302e+06	8.11657e+06	3.80948e+06	3.88919e+06	6.09188e+06	2.56609e+06	2.70215e+06	3.20951e+06	3.8478e+06	3.32499e+06	3.01891e+06	8.69954e+06	4.85325e+06	3.75894e+06	4.25212e+06	1.62323e+06	3.20707e+06	1.66228e+06	6.27581e+06	3.24323e+06	0	3.11616e+06	4.30725e+06	4.09391e+06	5.85233e+06	4.64951e+06	3.3522e+06	2.22499e+06	4.56787e+06	4.54356e+06	3.54467e+06	0	4.11463e+06	1.66369e+06	1.24069e+06	2.90627e+06	4.47435e+06	3.41092e+06	8.6611e+06	9.59202e+06	1.10743e+07	1.10437e+07
Q15911	Zinc finger homeobox protein 3	ZFHX3	ZFHX4;ZFHX3	DQEGGASSSQAEKELTDSPATSKR	S1189	1xPhospho [S18]	6.87101e+06	0	0	0	0	0	0	0	2.35768e+06	0	1.16745e+06	0	0	6.56556e+06	0	0	0	0	3.62756e+06	1.29198e+06	0	0	1.09467e+06	0	0	0	0	1.64245e+06	0	0	0	0	0	0	0	0	0	0	0	0	0	0	0
Q15911	Zinc finger homeobox protein 3	ZFHX3	ZFHX4;ZFHX3	EVSPLLPK	S3432	1xPhospho [S3]	4.21743e+06	5.30566e+06	7.38968e+06	6.10184e+06	6.87254e+06	5.45861e+06	4.74383e+06	5.3899e+06	5.89876e+06	0	6.49006e+06	4.62881e+06	1.37715e+07	0	6.7589e+06	7.99835e+06	6.50513e+06	6.2956e+06	6.93937e+06	1.947e+07	8.66903e+06	3.23753e+06	1.04618e+07	1.94246e+07	1.13337e+07	6.86553e+06	1.08369e+07	1.4886e+07	5.17721e+06	7.98446e+06	6.17469e+06	9.54203e+06	0	1.09385e+07	4.59065e+06	3.33438e+06	6.6146e+06	8.77592e+06	4.63667e+06	8.44181e+06	1.3311e+07	1.04785e+07	1.65619e+07
Q53TD9	Uncharacterized protein ZFHX1B (Fragment)	ZFHX1B	ZFHX1B;ZEB2	NANCTSDFEEYFAK	S7	1xCarbamidomethyl [C4]; 1xPhospho [S6]	0	0	0	0	0	0	0	960020	0	0	0	0	0	0	0	0	0	0	0	0	0	0	0	0	35691.8	0	0	0	0	0	71024.4	0	0	0	0	0	0	0	0	0	0	0	956556
Q53TD9	Uncharacterized protein ZFHX1B (Fragment)	ZFHX1B	ZFHX1B;ZEB2	SNTPSPLNLSSTSSK	S645	2xPhospho [S1; S5]	5.27502e+06	7.15521e+06	3.53739e+06	0	0	0	9.67311e+06	0	0	0	0	0	8.98275e+06	0	6.82925e+06	7.11391e+06	0	0	1.2834e+07	0	0	1.78057e+07	2.64438e+06	5.73353e+06	7.30979e+06	4.42479e+06	5.23124e+06	0	4.63345e+06	0	5.90488e+06	0	270688	0	4.23651e+06	0	0	1.99585e+06	0	0	0	1.84307e+07	4.65886e+06
Q53TD9	Uncharacterized protein ZFHX1B (Fragment)	ZFHX1B	ZFHX1B;ZEB2	SNTPSPLNLSSTSSK	S649	2xPhospho [S1; S5]	5.27502e+06	7.15521e+06	3.53739e+06	0	0	0	9.67311e+06	0	0	0	0	0	8.98275e+06	0	6.82925e+06	7.11391e+06	0	0	1.2834e+07	0	0	1.78057e+07	2.64438e+06	5.73353e+06	7.30979e+06	4.42479e+06	5.23124e+06	0	4.63345e+06	0	5.90488e+06	0	270688	0	4.23651e+06	0	0	1.99585e+06	0	0	0	1.84307e+07	4.65886e+06
Q53TD9	Uncharacterized protein ZFHX1B (Fragment)	ZFHX1B	ZFHX1B;ZEB2	ACLQSLTTDSR	S407	1xCarbamidomethyl [C2]; 1xPhospho [S5]	0	0	0	529439	0	0	491588	0	2.04305e+06	1.82375e+06	0	0	0	0	761517	0	0	0	2.96794e+06	0	0	0	0	0	2.7433e+06	0	0	0	0	0	655365	0	0	0	797689	712060	399587	0	0	0	0	0	0
Q53TD9	Uncharacterized protein ZFHX1B (Fragment)	ZFHX1B	ZFHX1B;ZEB2	DGHAVSIEEYLQR	S27	1xPhospho [S6]	0	0	0	0	0	0	0	0	0	0	0	0	0	0	0	0	0	0	0	0	0	0	0	0	0	0	0	649989	0	0	0	0	0	0	949361	474843	393439	0	0	0	0	0	0
Q53TD9	Uncharacterized protein ZFHX1B (Fragment)	ZFHX1B	ZFHX1B;ZEB2	GMTSPINPYK	S512	1xPhospho [S4]; 1xOxidation [M2]	1.48474e+08	1.60493e+07	1.20047e+07	2.79038e+07	4.01589e+07	1.58845e+07	2.00575e+07	1.83801e+07	2.45934e+07	2.43026e+07	1.77959e+07	1.268e+07	1.40882e+07	1.29497e+07	9.64007e+06	1.9115e+07	3.87343e+07	1.75051e+07	1.99863e+07	1.63988e+07	2.53987e+07	1.65104e+07	9.70961e+06	1.58065e+07	1.73305e+07	5.07164e+06	1.34977e+07	6.70295e+06	1.8794e+07	1.05978e+07	9.83867e+06	1.20542e+07	2.13443e+07	9.77897e+06	1.40361e+07	1.52743e+07	3.01924e+07	0	1.36988e+07	4.36757e+06	2.26378e+07	1.63839e+07	1.35875e+07
O60293	Zinc finger C3H1 domain-containing protein	ZFC3H1	ZFC3H1	KPISDNSFSSDEEQSTGPIK	S1303	2xPhospho [S9; S10]	0	0	0	0	0	0	0	1.12848e+06	0	0	0	0	0	0	2.35021e+06	0	0	2.94389e+06	0	1.5335e+06	0	0	0	0	0	2.98365e+06	0	1.87427e+06	0	3.7221e+06	0	859315	893877	0	0	1.67626e+06	1.39579e+06	0	0	0	0	0	789875
O60293	Zinc finger C3H1 domain-containing protein	ZFC3H1	ZFC3H1	KPISDNSFSSDEEQSTGPIK	S1304	2xPhospho [S9; S10]	0	0	0	0	0	0	0	1.12848e+06	0	0	0	0	0	0	2.35021e+06	0	0	2.94389e+06	0	1.5335e+06	0	0	0	0	0	2.98365e+06	0	1.87427e+06	0	3.7221e+06	0	859315	893877	0	0	1.67626e+06	1.39579e+06	0	0	0	0	0	789875
O60293	Zinc finger C3H1 domain-containing protein	ZFC3H1	ZFC3H1	SEKENDPLRTPEALPEEK	T766	1xPhospho [T10]	2.16046e+07	0	0	2.84954e+07	6.18999e+06	1.91646e+07	0	2.46997e+06	2.4977e+07	7.79487e+06	4.94738e+06	3.86607e+06	4.47466e+06	8.9148e+06	3.12659e+06	4.41576e+06	1.40951e+07	3.6581e+06	3.64467e+07	0	2.70298e+06	1.7547e+07	0	447432	1.31599e+07	7.44445e+06	1.56702e+07	3.96462e+06	2.40843e+06	1.48419e+07	0	1.75962e+06	4.92285e+06	3.3357e+06	5.71977e+06	1.20784e+07	7.30621e+06	6.22317e+06	1.07818e+07	8.01989e+06	1.0818e+07	4.66195e+06	3.15425e+06
O60293	Zinc finger C3H1 domain-containing protein	ZFC3H1	ZFC3H1	EQQNISPVVEEEPEFSLPQPSLHDLTQDK	S998	1xPhospho [S6]	0	388354	0	0	0	1.73946e+06	388604	0	0	234843	296725	0	0	207543	168482	137374	563002	218328	705899	0	0	410765	91665.8	346410	202170	0	0	217115	0	0	0	0	659414	276997	0	0	1.27254e+06	653825	0	0	113703	0	0
O60293	Zinc finger C3H1 domain-containing protein	ZFC3H1	ZFC3H1	AFKPEETSSNSDPPSPPVLNNSHPVPR	S655	1xPhospho [S15]	0	2.65582e+06	3.69087e+06	0	3.58151e+06	2.91611e+06	2.00885e+06	1.41485e+06	0	0	2.41819e+06	0	0	560893	0	3.50417e+06	0	2.60316e+06	0	0	5.93141e+06	0	0	0	0	0	0	2.56314e+06	1.3421e+06	0	0	0	0	0	1.13666e+06	2.70856e+06	825391	5.87145e+06	0	1.83713e+06	0	0	1.81716e+06
O60293	Zinc finger C3H1 domain-containing protein	ZFC3H1	ZFC3H1	ENDPLRTPEALPEEK	T766	1xPhospho [T7]	2.22266e+06	9.36337e+06	1.23056e+07	1.10214e+07	7.39482e+06	1.52395e+07	9.80033e+06	7.63625e+06	5.15206e+06	5.04491e+07	1.08825e+07	0	1.51798e+07	424329	7.28484e+06	6.58394e+06	1.29745e+07	2.57901e+07	1.14637e+07	5.49402e+06	9.60353e+06	1.25141e+07	6.88826e+06	6.57312e+06	8.55081e+06	1.20816e+07	9.52738e+06	5.14456e+06	7.65464e+06	3.00114e+07	7.64183e+06	7.22413e+06	0	3.3034e+06	0	4.98006e+06	1.22155e+07	2.22406e+07	1.29517e+07	1.00404e+07	4.36501e+06	1.51185e+07	5.80228e+06
O60293	Zinc finger C3H1 domain-containing protein	ZFC3H1	ZFC3H1	TSSSSPANSDVEIDGIGR	T801	2xPhospho [T1; S9]	0	0	0	0	0	0	0	0	0	0	0	0	0	0	0	0	0	0	2.55976e+06	0	0	1.64554e+06	0	0	0	0	0	0	0	0	0	0	0	0	0	0	1.26031e+06	0	1.18684e+06	0	0	0	0
O60293	Zinc finger C3H1 domain-containing protein	ZFC3H1	ZFC3H1	TSSSSPANSDVEIDGIGR	S809	2xPhospho [T1; S9]	0	0	0	0	0	0	0	0	0	0	0	0	0	0	0	0	0	0	2.55976e+06	0	0	1.64554e+06	0	0	0	0	0	0	0	0	0	0	0	0	0	0	1.26031e+06	0	1.18684e+06	0	0	0	0
O60293	Zinc finger C3H1 domain-containing protein	ZFC3H1	ZFC3H1	KHSAELIAMEK	S958	1xPhospho [S3]; 1xOxidation [M9]	0	0	0	1.13129e+06	0	0	0	0	0	1.14088e+06	0	0	0	0	0	0	0	0	0	0	0	0	0	0	0	0	0	0	0	0	0	0	0	0	0	0	0	0	0	0	0	0	761365
O60293	Zinc finger C3H1 domain-containing protein	ZFC3H1	ZFC3H1	RRSFLESNYFTKPNLK	S1046	1xPhospho [S3]	0	0	0	0	650721	0	0	0	0	0	0	0	0	0	0	0	0	0	0	0	0	0	0	0	0	0	0	0	0	0	0	0	0	0	0	0	0	1.04446e+06	0	0	0	0	0
A0JLS9	ZEB1 protein (Fragment)	ZEB1	ZEB1	MQAGQISVQSSEPSSPEPGK	S646	1xPhospho [S15]	0	0	0	0	0	0	0	2.26404e+06	0	0	0	0	0	0	0	0	0	0	0	0	0	0	0	0	0	1.42902e+06	0	0	0	0	0	0	0	0	0	0	0	0	0	0	0	0	2.03875e+06
A0JLS9	ZEB1 protein (Fragment)	ZEB1	ZEB1	NNDQPQSANANEPQDSTVNLQSPLK	S679	1xPhospho [S22]	0	1.87861e+06	0	1.64415e+06	1.31052e+06	1.98739e+06	5.73148e+06	2.20287e+06	2.97163e+06	211295	0	3.0319e+06	0	303875	2.26708e+06	0	2.4855e+06	2.31609e+06	3.92527e+06	3.19427e+06	0	2.67092e+06	1.66337e+06	4.48286e+06	1.93126e+06	0	2.05053e+06	0	0	5.45753e+06	0	1.36507e+06	582576	2.58463e+06	0	0	1.47437e+06	0	1.64774e+06	0	0	0	1.28064e+06
Q9ULC8	Palmitoyltransferase ZDHHC8	ZDHHC8	ZDHHC8;ZDHHC5	KVSGVGGTTYEISV	S754	1xPhospho [S3]	0	0	0	0	1.38107e+06	0	0	2.19118e+06	1.62234e+06	0	1.08687e+06	0	0	0	0	0	0	0	0	0	1.587e+06	0	0	2.19818e+06	0	0	0	2.24839e+06	1.07843e+06	0	0	0	0	0	2.62084e+06	2.44721e+06	0	0	0	0	0	0	0
Q9ULC8	Palmitoyltransferase ZDHHC8	ZDHHC8	ZDHHC8;ZDHHC5	TSPPTPAMYK	T351	1xPhospho [T5]	0	1.82999e+06	1.40804e+06	2.22514e+06	1.56019e+06	0	1.84456e+06	3.07816e+06	1.63121e+06	1.98426e+06	2.68847e+06	0	3.77514e+06	0	771451	1.18082e+06	1.40089e+06	1.81264e+06	0	4.23887e+06	1.06809e+06	2.58787e+06	2.04604e+06	1.85231e+06	767907	2.97411e+06	1.3031e+06	3.03558e+06	2.33603e+06	0	5.21234e+06	4.32731e+06	0	0	3.36075e+06	1.02447e+06	2.13188e+06	0	1.19531e+06	0	3.15342e+06	3.87949e+06	3.77183e+06
Q9C0B5	Palmitoyltransferase ZDHHC5	ZDHHC5	ZDHHC8;ZDHHC5	GVGSPEPGPTAPYLGR	S621	1xPhospho [S4]	7.78253e+06	2.8253e+06	1.02643e+07	5.74303e+06	3.76175e+06	8.1254e+06	9.05355e+06	1.10147e+07	7.17612e+06	0	1.4879e+07	2.0221e+07	2.92434e+06	0	1.34372e+07	2.25973e+06	7.40462e+06	4.4692e+06	7.92046e+06	9.78056e+06	5.24056e+06	2.84541e+06	4.1601e+06	2.36e+06	4.83625e+06	3.78637e+07	1.21371e+07	9.62282e+06	7.44757e+06	9.31056e+06	9.37242e+06	2.474e+06	0	1.26115e+06	7.09785e+06	1.40153e+07	1.39102e+07	1.03544e+07	1.64651e+07	6.58096e+06	3.9795e+06	0	1.83228e+06
Q9C0B5	Palmitoyltransferase ZDHHC5	ZDHHC5	ZDHHC8;ZDHHC5	QSPPLPGREEEPGLGDSGIQSTPGSGHAPR	S554	1xPhospho [S2]	2.37521e+06	0	1.68777e+07	0	0	1.80555e+06	0	1.79152e+06	0	0	0	0	0	0	1.0367e+06	2.13437e+06	0	3.89359e+06	0	0	3.29343e+06	7.23874e+06	9.69115e+06	0	4.34568e+06	0	0	1.21291e+07	0	0	8.69274e+06	0	0	0	0	1.58859e+07	0	0	0	0	0	0	0
Q9C0B5	Palmitoyltransferase ZDHHC5	ZDHHC5	ZDHHC8;ZDHHC5	LLRQSPPLPGREEEPGLGDSGIQSTPGSGHAPR	S554	1xPhospho [S5]	1.12287e+07	2.18248e+07	6.51435e+07	1.90741e+07	4.7047e+07	4.30933e+07	3.45051e+07	2.46218e+07	8.37562e+06	1.92491e+07	3.45808e+07	1.06761e+07	2.23761e+07	1.62689e+06	2.43576e+07	3.94213e+07	1.30178e+07	1.05087e+07	2.02212e+07	2.16328e+07	5.0778e+07	2.19358e+07	5.35361e+07	2.97747e+07	1.99969e+07	1.49059e+06	2.11924e+07	1.30591e+07	1.57847e+07	2.04585e+07	3.26124e+07	1.2504e+07	3.02739e+06	4.43481e+06	2.82783e+07	8.47437e+06	6.16751e+06	2.82823e+07	3.31298e+07	1.44063e+07	1.88699e+07	4.84075e+07	4.94265e+07
Q9C0B5	Palmitoyltransferase ZDHHC5	ZDHHC5	ZDHHC8;ZDHHC5	AQPGVSETEEVALQPLLTPKDEVQLK	T659	1xPhospho [T18]	318180	0	7.1511e+06	0	257615	0	0	304121	0	150567	0	0	109410	0	603304	93634.5	85126.5	0	155335	50570.2	0	247090	64135.2	0	154377	146020	0	109241	217872	0	61326.7	93940.2	0	369795	209146	228723	5.68784e+06	390534	0	0	0	0	0
Q9C0B5	Palmitoyltransferase ZDHHC5	ZDHHC5	ZDHHC8;ZDHHC5	TIVIRPPFLRPEVSDGQITVK	S274	1xPhospho [S14]	0	290352	641050	163106	0	51719.4	40552.8	0	0	0	0	0	0	0	0	0	0	0	0	0	0	0	0	0	0	0	0	0	0	0	0	0	0	0	0	0	0	88011.6	123965	0	0	0	0
Q9C0B5	Palmitoyltransferase ZDHHC5	ZDHHC5	ZDHHC8;ZDHHC5	HPSYRSEPSLEPESFR	S395	2xPhospho [S3; S6]	0	0	1.44562e+06	0	0	0	0	1.18268e+06	0	0	0	0	3.49616e+06	0	840758	0	0	0	0	0	0	0	0	0	0	3.87024e+06	2.41842e+06	8.73241e+06	559709	1.28768e+06	3.89371e+06	0	0	1.29884e+06	797543	1.88556e+06	2.51506e+06	795685	1.35367e+06	3.66097e+06	6.55338e+06	6.84364e+06	0
Q9C0B5	Palmitoyltransferase ZDHHC5	ZDHHC5	ZDHHC8;ZDHHC5	HPSYRSEPSLEPESFR	S398	2xPhospho [S3; S6]	0	0	1.44562e+06	0	0	0	0	1.18268e+06	0	0	0	0	3.49616e+06	0	840758	0	0	0	0	0	0	0	0	0	0	3.87024e+06	2.41842e+06	8.73241e+06	559709	1.28768e+06	3.89371e+06	0	0	1.29884e+06	797543	1.88556e+06	2.51506e+06	795685	1.35367e+06	3.66097e+06	6.55338e+06	6.84364e+06	0
Q9C0B5	Palmitoyltransferase ZDHHC5	ZDHHC5	ZDHHC8;ZDHHC5	HPSYRSEPSLEPESFRSPTFGK	S401	2xPhospho [S9; S14]	0	1.14946e+06	0	1.59019e+06	1.58874e+06	0	2.29959e+06	1.80491e+06	0	0	1.44412e+06	0	0	170615	2.80354e+06	5.41679e+06	1.36138e+06	3.32144e+06	1.98291e+06	882125	0	0	0	0	0	0	3.30277e+06	0	1.02516e+06	0	0	0	0	0	745157	0	0	1.30665e+06	3.08875e+06	0	1.97697e+06	0	0
Q9C0B5	Palmitoyltransferase ZDHHC5	ZDHHC5	ZDHHC8;ZDHHC5	HPSYRSEPSLEPESFRSPTFGK	S406	2xPhospho [S9; S14]	0	1.14946e+06	0	1.59019e+06	1.58874e+06	0	2.29959e+06	1.80491e+06	0	0	1.44412e+06	0	0	170615	2.80354e+06	5.41679e+06	1.36138e+06	3.32144e+06	1.98291e+06	882125	0	0	0	0	0	0	3.30277e+06	0	1.02516e+06	0	0	0	0	0	745157	0	0	1.30665e+06	3.08875e+06	0	1.97697e+06	0	0
Q9C0B5	Palmitoyltransferase ZDHHC5	ZDHHC5	ZDHHC8;ZDHHC5	SLGSASPGPGQPPLSSPTR	S684	2xPhospho [S6; S15]	1.68088e+06	0	2.28945e+06	1.53523e+06	1.08835e+06	1.98274e+06	0	746210	0	0	1.31596e+06	1.75105e+06	907119	0	1.79973e+06	1.52464e+06	2.74397e+06	0	2.74301e+06	0	2.79145e+06	0	1.12567e+06	0	1.50041e+06	9.02858e+06	2.24907e+06	1.58326e+06	1.56459e+06	0	0	0	0	0	0	0	1.13222e+06	0	0	1.82921e+06	0	0	0
Q9C0B5	Palmitoyltransferase ZDHHC5	ZDHHC5	ZDHHC8;ZDHHC5	SLGSASPGPGQPPLSSPTR	S693	2xPhospho [S6; S15]	1.68088e+06	0	2.28945e+06	1.53523e+06	1.08835e+06	1.98274e+06	0	746210	0	0	1.31596e+06	1.75105e+06	907119	0	1.79973e+06	1.52464e+06	2.74397e+06	0	2.74301e+06	0	2.79145e+06	0	1.12567e+06	0	1.50041e+06	9.02858e+06	2.24907e+06	1.58326e+06	1.56459e+06	0	0	0	0	0	0	0	1.13222e+06	0	0	1.82921e+06	0	0	0
Q9C0B5	Palmitoyltransferase ZDHHC5	ZDHHC5	ZDHHC8;ZDHHC5	HIVASLQER	S543	1xPhospho [S5]	1.796e+06	851877	3.18667e+06	823269	0	0	0	1.44437e+06	0	0	2.1362e+06	0	0	0	0	0	1.25227e+06	916679	0	1.22216e+06	0	0	0	0	1.36051e+06	2.61083e+06	2.07139e+06	2.21222e+06	0	1.54368e+06	1.68866e+06	0	0	1.37161e+06	0	4.93852e+06	2.03286e+06	1.40798e+06	0	0	0	0	1.28495e+06
Q9C0B5	Palmitoyltransferase ZDHHC5	ZDHHC5	ZDHHC8;ZDHHC5	THLGLATNEDSSLLAKDSPPTPTMYK	T334	2xPhospho [T7; T21]	107745	0	652954	0	0	0	0	0	0	0	0	0	0	0	0	126640	134119	0	0	0	0	0	0	0	0	0	0	966556	0	0	0	0	0	260664	0	605966	0	186010	1.03496e+06	0	0	0	0
Q9C0B5	Palmitoyltransferase ZDHHC5	ZDHHC5	ZDHHC8;ZDHHC5	THLGLATNEDSSLLAKDSPPTPTMYK	T348	2xPhospho [T7; T21]	107745	0	652954	0	0	0	0	0	0	0	0	0	0	0	0	126640	134119	0	0	0	0	0	0	0	0	0	0	966556	0	0	0	0	0	260664	0	605966	0	186010	1.03496e+06	0	0	0	0
Q9C0B5	Palmitoyltransferase ZDHHC5	ZDHHC5	ZDHHC8;ZDHHC5	GDSLKEPTSIAESSR	S380	2xPhospho [S3; S9]	0	0	2.35665e+06	0	0	0	0	0	0	0	0	0	0	0	0	0	0	0	0	0	0	0	0	0	0	1.43244e+06	0	910107	0	0	0	0	0	3.56758e+06	0	0	635934	0	0	0	0	0	0
Q9C0B5	Palmitoyltransferase ZDHHC5	ZDHHC5	ZDHHC8;ZDHHC5	GDSLKEPTSIAESSR	S386	2xPhospho [S3; S9]	0	0	2.35665e+06	0	0	0	0	0	0	0	0	0	0	0	0	0	0	0	0	0	0	0	0	0	0	1.43244e+06	0	910107	0	0	0	0	0	3.56758e+06	0	0	635934	0	0	0	0	0	0
B3KXV3	Palmitoyltransferase	ZDHHC23	ZDHHC23	SLSSSQLECLSR	S200	1xCarbamidomethyl [C9]; 1xPhospho [S3]	0	0	2.31154e+06	816252	1.95899e+06	0	1.18426e+06	971339	2.61258e+06	0	1.96187e+06	0	2.86714e+06	0	1.32149e+06	0	0	0	0	4.22565e+06	3.33259e+06	0	0	2.60239e+06	0	2.98089e+06	1.02595e+06	3.18037e+06	4.5077e+06	0	0	1.51734e+06	0	0	2.25561e+06	1.21182e+06	2.1866e+06	0	0	1.29596e+06	1.95158e+06	0	854058
I3L202	Palmitoyltransferase	ZDHHC1	ZDHHC1	LGSAALAAPR	S438	1xPhospho [S3]	1.88012e+07	7.58537e+07	1.06644e+07	7.87314e+06	9.1956e+06	5.44935e+07	4.96838e+06	4.37762e+06	6.55357e+07	2.99795e+07	2.73162e+06	0	0	0	2.50911e+07	4.11336e+07	9.40777e+06	1.96461e+07	4.5395e+07	2.61201e+06	1.2843e+07	1.21351e+08	2.94771e+06	4.89656e+06	9.6534e+06	1.35092e+06	4.90736e+06	555089	1.13482e+07	2.15558e+07	4.71633e+06	5.7277e+06	0	1.03693e+07	2.33117e+06	513556	3.19661e+06	1.23548e+07	8.55256e+06	0	0	0	0
G3V1V1	Zinc finger CCHC-type and RNA binding motif 1, isoform CRA_b	ZCRB1	ZCRB1	KKAPEPEEEIEEVEESEDEGEDPALDSLSQAIAFQQAK	S114	1xPhospho [S16]	0	1.20174e+06	1.49749e+06	235425	127163	0	345872	490742	467259	171593	451536	198496	0	2.08786e+06	795785	0	0	0	0	305584	181784	335073	325016	234687	0	212222	192260	853300	417397	613602	0	178350	0	0	144036	0	983455	767964	606094	0	0	0	73331.7
Q8N3Z6	Zinc finger CCHC domain-containing protein 7	ZCCHC7	ZCCHC7	TYSSPGSFK	S482	1xPhospho [S4]	2.65566e+06	0	0	0	0	0	0	0	0	1.2235e+06	0	0	0	0	1.80973e+06	0	956796	0	0	2.65413e+06	0	0	0	0	0	0	0	2.26098e+06	869673	0	1.66552e+06	0	0	0	0	1.20957e+06	0	1.31569e+06	0	0	0	0	0
Q9NP64	Nucleolar protein of 40 kDa	ZCCHC17	ZCCHC17	RRSFQDYTGQK	S114	1xPhospho [S3]	0	0	0	0	0	0	7.62308e+06	8.60156e+06	0	1.37261e+07	1.06574e+07	4.65545e+06	1.07865e+07	1.14539e+07	2.07078e+07	0	3.59981e+06	3.65251e+06	6.34131e+06	6.16552e+06	0	6.89997e+06	3.70853e+07	0	5.57012e+06	0	5.54225e+06	1.62737e+07	0	8.08179e+06	0	0	0	1.64533e+06	9.73473e+06	2.85896e+06	6.72841e+06	2.65074e+06	1.81863e+07	3.06829e+06	1.46402e+07	0	8.85363e+06
Q9NP64	Nucleolar protein of 40 kDa	ZCCHC17	ZCCHC17	YSLIPDEEEEKEEAKSAEFEKPDPTR	S170	1xPhospho [S16]	4.58383e+06	4.30558e+06	5.97257e+06	2.69521e+06	4.66809e+06	3.28528e+06	4.53129e+06	3.38724e+06	3.93944e+06	0	4.54532e+06	6.91571e+06	1.71997e+06	0	5.43155e+06	1.79201e+06	5.95555e+06	1.87285e+06	1.28845e+07	8.13047e+06	1.37198e+06	5.38099e+06	1.40117e+07	4.6065e+06	0	4.7907e+06	3.84098e+06	4.91409e+06	6.19511e+06	3.23128e+06	3.134e+06	1.34703e+06	0	1.83898e+06	1.042e+08	1.76472e+06	9.82551e+06	0	4.68313e+06	2.4859e+06	6.39171e+06	0	1.61881e+06
Q9NP64	Nucleolar protein of 40 kDa	ZCCHC17	ZCCHC17	SFQDYTGQK	S114	1xPhospho [S1]	11800311	1.33523e+07	1.16865e+07	1.60511e+07	8.91225e+06	1.43244e+07	1.27561e+07	1.88011e+07	8.74784e+06	2.03495e+07	2.00625e+07	9.14527e+06	1.32199e+07	7.68278e+06	1.80555e+07	3.00706e+07	1.04041e+07	1.13055e+07	1.04567e+07	1.60817e+07	1.03897e+07	2.36831e+07	8.88903e+07	6.15652e+06	1.37288e+07	5.79517e+06	1.77396e+07	2.78152e+07	9.76139e+06	2.09173e+07	1.16301e+07	1.01862e+07	1.39533e+07	9.50563e+06	1.3211e+07	1.02359e+07	1.75573e+07	1.12425e+07	1.85116e+07	9.89769e+06	2.74525e+07	8.45432e+06	2.23225e+07
Q86WB0	Nuclear-interacting partner of ALK	ZC3HC1	ZC3HC1;NIPA	SQDATFSPGSEQAEKSPGPIVSR	S338	2xPhospho [S10; S]	5.81657e+06	3.56969e+06	1.1625e+07	0	0	1.19334e+07	6.11139e+06	7.00655e+06	3.08158e+06	2.09963e+07	6.78917e+06	5.01473e+06	0	0	1.02815e+07	0	1.04141e+07	6.74749e+06	8.73535e+06	1.53101e+07	0	0	8.61182e+06	9.64983e+06	6.80413e+06	9.54143e+06	1.23533e+07	6.34265e+06	4.33389e+06	1.53752e+07	1.01695e+07	0	0	6.66382e+06	0	4.52349e+06	8.8808e+06	8.29938e+06	0	3.14187e+06	0	7.37129e+06	6.1829e+06
Q86WB0	Nuclear-interacting partner of ALK	ZC3HC1	ZC3HC1;NIPA	LPLVPESPR	S321	1xPhospho [S7]	0	3.30099e+06	0	1.01587e+07	5.72315e+06	905277	4.23257e+06	7.30631e+06	1.17506e+07	0	6.65093e+06	7.14019e+06	0	0	7.01869e+06	9.86902e+06	1.66519e+07	1.17654e+07	0	1.08493e+07	9.98732e+06	2.57442e+06	1.04857e+07	8.51358e+06	1.4865e+07	8.10996e+06	1.12911e+07	1.29651e+07	1.29104e+07	1.66955e+07	3.67996e+06	9.70777e+06	0	7.42817e+06	1.31039e+07	1.18953e+07	1.77232e+07	1.5471e+07	4.19695e+06	6.88158e+06	1.26278e+07	0	3.70925e+06
Q86WB0	Nuclear-interacting partner of ALK	ZC3HC1	ZC3HC1;NIPA	LPLVPESPRR	S321	1xPhospho [S7]	2.26587e+07	5.64737e+06	0	1.15406e+07	1.76322e+07	2.48946e+06	1.88851e+07	3.42634e+07	3.61354e+07	3.27892e+07	1.78649e+07	3.99931e+07	0	0	3.86909e+07	2.9572e+07	4.92623e+07	2.86066e+07	2.59623e+07	3.98548e+07	5.4162e+07	3.71782e+06	2.86592e+07	2.45271e+07	6.60348e+07	2.14375e+07	4.84615e+07	1.00596e+08	1.0605e+08	5.29305e+07	1.01089e+07	2.36447e+07	0	2.91846e+07	6.64475e+07	8.48521e+07	7.66689e+07	7.41836e+07	3.1421e+07	4.50825e+07	6.93644e+07	9.26598e+06	1.79776e+07
Q86WB0	Nuclear-interacting partner of ALK	ZC3HC1	ZC3HC1;NIPA	NWGAVVRSPEGTPQK	S24	1xPhospho [S8]	0	0	0	0	3.28397e+06	0	0	2.71913e+06	2.06577e+06	0	0	0	0	0	0	0	1.72012e+06	1.97374e+06	0	1.01538e+06	1.19464e+06	0	0	0	0	0	0	934736	0	0	0	2.20848e+06	0	1.76813e+06	1.9789e+06	0	3.34539e+06	4.85875e+06	0	0	2.91595e+06	0	5.3011e+06
Q86WB0	Nuclear-interacting partner of ALK	ZC3HC1	ZC3HC1;NIPA	SWDSSSPVDRPEPEAASPTTR	S359	2xPhospho [S6; S17]	1.68763e+06	0	789374	0	3.45309e+06	0	781629	1.18223e+06	0	9.16979e+06	2.30476e+06	1.07778e+06	991749	0	1.79886e+06	0	1.29135e+06	0	1.39488e+06	1.73451e+06	730468	3.82289e+06	1.98702e+06	1.06223e+07	0	1.06208e+06	0	1.23178e+06	0	0	3.35181e+06	0	573009	2.28934e+06	4.10778e+06	1.43653e+06	3.82903e+06	1.14875e+06	781378	0	0	0	750052
Q86WB0	Nuclear-interacting partner of ALK	ZC3HC1	ZC3HC1;NIPA	SWDSSSPVDRPEPEAASPTTR	S370	2xPhospho [S6; S17]	1.68763e+06	0	789374	0	3.45309e+06	0	781629	1.18223e+06	0	9.16979e+06	2.30476e+06	1.07778e+06	991749	0	1.79886e+06	0	1.29135e+06	0	1.39488e+06	1.73451e+06	730468	3.82289e+06	1.98702e+06	1.06223e+07	0	1.06208e+06	0	1.23178e+06	0	0	3.35181e+06	0	573009	2.28934e+06	4.10778e+06	1.43653e+06	3.82903e+06	1.14875e+06	781378	0	0	0	750052
Q86WB0	Nuclear-interacting partner of ALK	ZC3HC1	ZC3HC1;NIPA	TRSWDSSSPVDRPEPEAASPTTR	T352	3xPhospho [T1; S8; S19]	5.31821e+06	9.07019e+06	3.36911e+06	6.45329e+06	2.18817e+06	0	6.11054e+06	5.65695e+06	0	0	5.94783e+06	0	0	0	2.45957e+06	0	0	3.29809e+06	1.91513e+06	6.25933e+06	0	0	3.07282e+06	2.04186e+06	4.60519e+06	5.97528e+06	4.75684e+06	3.20333e+06	3.13742e+06	0	9.2349e+06	0	0	0	0	0	4.03023e+06	0	1.1228e+06	3.33413e+06	0	5.86666e+06	1.39826e+06
Q86WB0	Nuclear-interacting partner of ALK	ZC3HC1	ZC3HC1;NIPA	TRSWDSSSPVDRPEPEAASPTTR	S359	3xPhospho [T1; S8; S19]	5.31821e+06	9.07019e+06	3.36911e+06	6.45329e+06	2.18817e+06	0	6.11054e+06	5.65695e+06	0	0	5.94783e+06	0	0	0	2.45957e+06	0	0	3.29809e+06	1.91513e+06	6.25933e+06	0	0	3.07282e+06	2.04186e+06	4.60519e+06	5.97528e+06	4.75684e+06	3.20333e+06	3.13742e+06	0	9.2349e+06	0	0	0	0	0	4.03023e+06	0	1.1228e+06	3.33413e+06	0	5.86666e+06	1.39826e+06
Q86WB0	Nuclear-interacting partner of ALK	ZC3HC1	ZC3HC1;NIPA	TRSWDSSSPVDRPEPEAASPTTR	S370	3xPhospho [T1; S8; S19]	5.31821e+06	9.07019e+06	3.36911e+06	6.45329e+06	2.18817e+06	0	6.11054e+06	5.65695e+06	0	0	5.94783e+06	0	0	0	2.45957e+06	0	0	3.29809e+06	1.91513e+06	6.25933e+06	0	0	3.07282e+06	2.04186e+06	4.60519e+06	5.97528e+06	4.75684e+06	3.20333e+06	3.13742e+06	0	9.2349e+06	0	0	0	0	0	4.03023e+06	0	1.1228e+06	3.33413e+06	0	5.86666e+06	1.39826e+06
Q86WB0	Nuclear-interacting partner of ALK	ZC3HC1	ZC3HC1;NIPA	NWGAVVRSPEGTPQK	S24	2xPhospho [S8; T12]	0	2.36726e+06	1.89243e+06	0	0	0	0	0	0	0	0	0	0	0	0	3.31686e+06	0	0	0	0	0	2.53029e+06	0	0	0	0	0	3.15212e+06	2.66418e+06	0	0	0	0	4.29178e+06	0	2.39794e+06	0	0	0	0	5.86507e+06	0	2.73923e+06
Q86WB0	Nuclear-interacting partner of ALK	ZC3HC1	ZC3HC1;NIPA	NWGAVVRSPEGTPQK	T28	2xPhospho [S8; T12]	0	2.36726e+06	1.89243e+06	0	0	0	0	0	0	0	0	0	0	0	0	3.31686e+06	0	0	0	0	0	2.53029e+06	0	0	0	0	0	3.15212e+06	2.66418e+06	0	0	0	0	4.29178e+06	0	2.39794e+06	0	0	0	0	5.86507e+06	0	2.73923e+06
Q86WB0	Nuclear-interacting partner of ALK	ZC3HC1	ZC3HC1;NIPA	SPGPIVSR	S344	1xPhospho [S1]	1.13736e+06	823478	1.9922e+06	2.44148e+06	780711	1.92076e+06	971738	1.31046e+06	1.20975e+06	2.10574e+06	0	0	954445	1.43415e+06	712305	1.53364e+06	1.32569e+06	1.39642e+06	1.49966e+06	1.17611e+06	1.34208e+06	0	1.52501e+06	1.45683e+06	1.33607e+06	1.1934e+06	1.33656e+06	918192	967132	1.14656e+06	1.29228e+06	791484	0	1.40027e+06	1.31777e+06	0	1.60492e+06	1.66882e+06	0	0	982738	0	972847
Q7Z2W4	Zinc finger CCCH-type antiviral protein 1	ZC3HAV1	ZC3HAV1	SCTPSPDQISHRASLEDAPVDDLTR	S280	1xCarbamidomethyl [C2]; 3xPhospho [S10; S/T]	4.57152e+06	2.28684e+06	2.94306e+06	3.34213e+06	1.69228e+06	2.4258e+06	3.97102e+06	7.77244e+06	2.56169e+06	0	3.51586e+06	0	0	0	4.41543e+06	270832	72291.8	3.22123e+06	171699	6.34142e+06	417824	0	0	1.9461e+06	106176	162824	4.42366e+06	1.32896e+07	3.93653e+06	147071	81190.9	8.95466e+06	0	0	5.60061e+06	5.61169e+06	2.73831e+06	0	1.89022e+06	4.77742e+06	1.10773e+07	0	9.69528e+06
Q7Z2W4	Zinc finger CCCH-type antiviral protein 1	ZC3HAV1	ZC3HAV1	ASLEDAPVDDLTR	S284	1xPhospho [S2]	7.13081e+07	6.98578e+07	71287446	7.80837e+07	6.92813e+07	4.01324e+07	7.43493e+07	1.67459e+08	8.72622e+07	0	1.0273e+08	5.32253e+07	142073	0	5.56336e+07	182436	0	1.09007e+08	0	1.25801e+08	6.03379e+07	1.78425e+07	1.79522e+08	1.00698e+08	9.52451e+07	8.74788e+07	1.16445e+08	1.68877e+08	1.0974e+08	0	1.29452e+08	128085011	0	7.99639e+07	1.41339e+08	1.15853e+08	2.10849e+08	5.31344e+07	3.95127e+07	6.1286e+07	1.57137e+08	0	9.05149e+07
Q7Z2W4	Zinc finger CCCH-type antiviral protein 1	ZC3HAV1	ZC3HAV1	FFQGSQEFLASASASAER	S257	1xPhospho [S5]	207663	164112	1.46217e+06	0	0	0	2.95152e+06	1.7503e+07	0	0	0	0	0	0	0	0	193922	0	0	0	99309.5	0	103906	73760.3	0	75566.9	71884.4	1.23478e+06	0	250787	0	306880	0	0	0	0	0	299454	652093	0	0	0	0
Q7Z2W4	Zinc finger CCCH-type antiviral protein 1	ZC3HAV1	ZC3HAV1	RKTVFSPTLPAAR	T375	2xPhospho [T3; S6]	532587	0	4.64626e+06	1.53795e+06	0	0	0	0	0	0	0	0	0	0	0	0	0	0	0	0	0	0	0	0	0	836553	0	3.6851e+06	0	0	0	0	0	0	0	3.56009e+06	2.75496e+06	0	0	0	0	0	0
Q7Z2W4	Zinc finger CCCH-type antiviral protein 1	ZC3HAV1	ZC3HAV1	RKTVFSPTLPAAR	S378	2xPhospho [T3; S6]	532587	0	4.64626e+06	1.53795e+06	0	0	0	0	0	0	0	0	0	0	0	0	0	0	0	0	0	0	0	0	0	836553	0	3.6851e+06	0	0	0	0	0	0	0	3.56009e+06	2.75496e+06	0	0	0	0	0	0
Q7Z2W4	Zinc finger CCCH-type antiviral protein 1	ZC3HAV1	ZC3HAV1	TVFSPTLPAAR	S378	1xPhospho [S4]	0	0	1.19788e+07	1.24586e+06	0	6.02928e+06	6.73936e+06	7.16945e+06	0	0	4.7498e+06	0	0	0	7.62675e+06	0	0	0	0	0	0	0	0	0	0	0	0	2.13814e+07	2.03021e+07	0	0	0	0	0	3.01772e+06	2.24933e+07	5.8227e+06	0	1.77102e+07	0	4.13507e+06	0	1.04653e+06
Q7Z2W4	Zinc finger CCCH-type antiviral protein 1	ZC3HAV1	ZC3HAV1	IQDAGPASRDVQATGR	S469	1xPhospho [S8]	1.27409e+07	3.36972e+06	0	2.44433e+06	1.36603e+06	0	8.17929e+06	8.87568e+06	0	0	1.14305e+07	3.96089e+06	0	3.81496e+06	1.74227e+06	1.18344e+06	3.80107e+06	1.5821e+06	0	2.22043e+07	1.40197e+06	0	2.33866e+06	1.71457e+06	0	1.03209e+07	5.53296e+06	3.02854e+07	4.85215e+06	3.04633e+06	1.3492e+07	6.87638e+06	0	2.23083e+06	8.92612e+06	2.98651e+07	3.14282e+07	4.93606e+06	4025469	0	2.42415e+07	9.57729e+06	1.70939e+07
Q7Z2W4	Zinc finger CCCH-type antiviral protein 1	ZC3HAV1	ZC3HAV1	FTYLGSQDR	S302	1xPhospho [S6]	0	0	1.15825e+06	0	0	0	0	598115	0	0	0	0	0	0	0	0	0	0	0	507319	0	0	0	465664	0	1.29018e+06	1.27386e+06	744332	0	0	1.12204e+06	0	0	0	0	0	843413	756130	0	0	0	0	869000
A0A0C4DGZ1	Zinc finger CCCH domain-containing protein 8	ZC3H8	ZC3H8;LOC84524	TATDSDERIDDEIDTEVEETQEEK	T20	1xPhospho [T3]	0	831502	0	0	0	0	0	5.79189e+06	0	0	0	0	0	0	0	954937	0	1.0663e+06	0	0	0	0	0	1.29851e+06	0	1.90083e+06	0	5.1691e+06	2.02675e+06	0	0	2.80445e+06	0	0	733202	0	2.47642e+06	1.87313e+06	0	0	0	0	1.04413e+06
Q9UGR2	Zinc finger CCCH domain-containing protein 7B	ZC3H7B	ZC3H7B	GSLDKPDSFMEETNSQDHRPPSGAQKPAPSPEPCMPNTALLIK	S399	1xCarbamidomethyl [C34]; 1xPhospho [S30]	0	0	0	0	0	0	0	0	0	0	0	0	0	0	0	0	325172	0	0	0	0	0	0	0	0	0	0	0	0	138389	0	0	0	202662	0	0	0	0	0	0	0	0	0
Q9UGR2	Zinc finger CCCH domain-containing protein 7B	ZC3H7B	ZC3H7B	TSFVGSYYLCK	S477	1xCarbamidomethyl [C10]; 1xPhospho [S2]	0	0	474905	297175	0	0	881099	0	0	0	251254	0	0	0	426083	0	0	0	0	0	0	0	0	0	0	0	0	0	0	0	0	0	0	0	0	1.42475e+06	0	0	307256	0	0	0	0
Q8IWR0	Zinc finger CCCH domain-containing protein 7A	ZC3H7A	ZC3H7A	ALNHSVEDIEPDLLTPR	T210	1xPhospho [T15]	320393	0	746557	409015	0	2.66448e+06	3.65877e+06	5.27408e+06	3.07984e+06	0	3.02474e+06	0	0	0	1.07825e+06	268638	170210	0	0	2.31201e+06	4.17539e+06	0	67685.6	5.29906e+06	0	0	0	1.77799e+06	3.5746e+06	92678.4	0	2.47635e+06	0	0	5.65786e+06	3.41584e+06	1.83156e+06	0	914398	1.42177e+06	5.25714e+06	0	2.7874e+06
P61129	Zinc finger CCCH domain-containing protein 6	ZC3H6	ZC3H6	KPSESAPLDLR	S772	1xPhospho [S3]	0	0	0	0	0	0	2.0069e+06	2.30971e+06	0	0	6.6612e+06	2.43931e+06	0	2.02086e+06	2.76201e+06	1.59741e+06	2.64617e+06	0	0	1.32665e+06	0	0	0	0	0	0	2.65036e+06	1.9685e+06	657599	0	0	0	0	0	0	1.90606e+06	895115	0	0	0	0	3.54939e+06	2.39663e+06
P61129	Zinc finger CCCH domain-containing protein 6	ZC3H6	ZC3H6	QPGQGSPTPDNDPGR	S1158	1xPhospho [S6]	997987	0	0	0	0	0	0	1.19788e+06	0	0	0	0	0	0	0	2.7193e+06	0	0	0	0	0	0	0	2.31564e+06	1.89499e+06	1.46555e+06	0	0	0	0	0	0	0	0	0	0	0	0	0	0	0	0	0
Q9UPT8	Zinc finger CCCH domain-containing protein 4	ZC3H4	ZC3H4	QDRENEEGDTGNWYSSDEDEGGSSVTSILK	S807	2xPhospho [S15; S16]	0	0	0	865267	0	0	3.27871e+06	3.07668e+06	0	0	0	0	0	0	0	0	0	0	0	0	0	0	0	0	0	0	0	0	0	0	0	0	0	0	0	0	1.90219e+06	0	0	0	0	0	0
Q9UPT8	Zinc finger CCCH domain-containing protein 4	ZC3H4	ZC3H4	QDRENEEGDTGNWYSSDEDEGGSSVTSILK	S808	2xPhospho [S15; S16]	0	0	0	865267	0	0	3.27871e+06	3.07668e+06	0	0	0	0	0	0	0	0	0	0	0	0	0	0	0	0	0	0	0	0	0	0	0	0	0	0	0	0	1.90219e+06	0	0	0	0	0	0
Q9UPT8	Zinc finger CCCH domain-containing protein 4	ZC3H4	ZC3H4	TGSGSPFAGNSPAREGEQDAASLKDVFK	S1269	2xPhospho [S/T]	0	0	2.28665e+06	0	182881	0	2.00965e+06	3.64517e+06	0	0	0	0	77272.3	0	0	0	255042	0	235587	82220.4	249181	0	92373.5	0	0	205999	116675	8.20931e+06	1.95162e+07	0	0	368498	0	1.22399e+06	3.3021e+06	2.84442e+06	3.28537e+06	551962	4.69112e+06	0	0	0	1.61892e+06
Q9UPT8	Zinc finger CCCH domain-containing protein 4	ZC3H4	ZC3H4	TGSGSPFAGNSPAREGEQDAASLK	S1269	2xPhospho [S5; S]	1.78954e+06	2.15358e+06	7.37056e+06	0	8.84551e+06	0	4.07437e+06	1.14354e+07	0	0	1.39576e+07	0	0	0	4.59352e+06	1.56671e+07	2.89813e+06	2.38098e+06	1.73864e+07	1.85923e+07	1.01463e+07	2.98463e+06	1.26496e+07	9.83101e+06	5.68696e+06	1.14424e+07	1.84655e+06	1.35302e+07	7.28997e+06	1.139e+07	0	3.5414e+06	748978	9.31141e+06	7.61745e+06	1.75091e+07	2.96989e+07	2.06198e+06	0	5.43929e+06	0	0	0
Q9UPT8	Zinc finger CCCH domain-containing protein 4	ZC3H4	ZC3H4	AAAAPAATTATPPPEGAPPQPGVHNLPVPTLFGTVK	T1235	1xPhospho [T11]	0	0	584990	0	158402	0	0	93308	0	464441	112762	0	0	0	0	0	0	0	0	0	0	0	0	0	0	0	178169	0	0	0	186577	0	0	0	0	360764	238959	0	397196	0	0	0	82961
Q9UPT8	Zinc finger CCCH domain-containing protein 4	ZC3H4	ZC3H4	AAKPGPAEAPSPTASPSGDASPPATAPYDPR	S1110	3xPhospho [S17; S/T]	2.64197e+06	3.59443e+06	3.7963e+06	4.14418e+06	3.84649e+06	0	6.35746e+06	6.36564e+06	0	0	3.16872e+06	0	0	626782	0	0	1.38004e+06	0	0	2.94168e+06	0	2.68236e+06	0	1.23709e+06	2.94234e+06	4.0676e+06	2.17019e+06	7.18932e+06	4.28813e+06	0	726903	4.45081e+06	407777	0	0	1.37546e+06	8.74174e+06	1.37553e+06	0	0	0	0	1.27182e+06
Q9UPT8	Zinc finger CCCH domain-containing protein 4	ZC3H4	ZC3H4	TGSGSPFAGNSPAR	S1275	2xPhospho [S11; S/T]	2.03242e+07	1.23579e+07	2.02935e+07	8.66702e+06	1.30868e+07	4.51514e+06	1.13441e+07	2.40442e+07	4.57696e+06	9.18343e+06	1.47884e+07	1.56768e+07	4.71974e+06	7.60074e+06	8.0052e+06	9.43979e+06	1.3018e+07	1.91768e+07	3.88755e+06	2.24522e+07	1.78365e+07	2.46474e+06	1.87247e+07	2.26699e+07	1.2733e+07	1.23638e+07	1.14579e+07	2.56356e+07	1.75584e+07	5.34243e+06	8.86592e+06	2.5053e+07	0	1.77942e+07	1.39905e+07	1.61612e+07	4.92772e+07	2.03427e+07	3.49602e+06	2.20119e+06	7.05744e+06	1.01288e+07	4.30272e+06
Q9UPT8	Zinc finger CCCH domain-containing protein 4	ZC3H4	ZC3H4	ALPTSKPEGSLHSSPVGPSSSK	S904	2xPhospho [S10; S13]	0	0	1.71585e+06	0	0	0	0	0	0	0	0	0	0	0	0	0	0	0	0	1.00273e+06	0	0	0	0	0	0	0	4.61091e+06	878347	0	0	0	0	0	2.85217e+07	0	3.68951e+06	0	1.3769e+06	0	1.87502e+06	0	0
Q9UPT8	Zinc finger CCCH domain-containing protein 4	ZC3H4	ZC3H4	ALPTSKPEGSLHSSPVGPSSSK	S907	2xPhospho [S10; S13]	0	0	1.71585e+06	0	0	0	0	0	0	0	0	0	0	0	0	0	0	0	0	1.00273e+06	0	0	0	0	0	0	0	4.61091e+06	878347	0	0	0	0	0	2.85217e+07	0	3.68951e+06	0	1.3769e+06	0	1.87502e+06	0	0
Q9UPT8	Zinc finger CCCH domain-containing protein 4	ZC3H4	ZC3H4	GFDPTASPFCQ	S1299	1xCarbamidomethyl [C10]; 1xPhospho [S7]	0	0	0	0	0	0	0	398156	0	0	0	0	0	0	0	0	0	0	0	0	0	0	0	0	0	0	0	1.25176e+06	0	0	0	0	0	0	0	749134	0	0	0	0	0	0	383058
Q9UPT8	Zinc finger CCCH domain-containing protein 4	ZC3H4	ZC3H4	EGEQDAASLKDVFK	S1286	1xPhospho [S8]	0	0	2.69272e+06	1.14303e+06	0	0	661985	1.1611e+06	0	0	1.84748e+06	1.57057e+06	0	0	0	0	0	1.16465e+06	0	1.44765e+06	0	0	0	0	0	1.73809e+06	1.86722e+06	1.68042e+06	562551	0	931988	0	0	0	3.54384e+06	2.26806e+06	2.36013e+06	1.68778e+06	0	0	1.65987e+06	0	1.06891e+06
Q8IXZ2	Zinc finger CCCH domain-containing protein 3	ZC3H3	ZC3H3	SVGSVGDSPREPR	S211	1xPhospho [S8]	0	0	0	0	0	0	0	0	0	0	989962	0	0	0	0	0	0	0	0	0	0	0	0	0	0	0	0	2.53667e+06	0	0	0	0	0	0	0	0	0	3.51086e+06	0	0	0	0	0
Q8WU90	Zinc finger CCCH domain-containing protein 15	ZC3H15	ZC3H15	DVDETGITVASLER	S351	1xPhospho [S11]	0	0	2.31969e+06	0	0	0	0	1.57366e+06	1.35748e+06	0	0	0	0	0	0	0	125946	1.68817e+06	168155	2.61593e+06	1.8724e+06	0	1.74772e+06	2.76966e+06	0	4.33426e+06	2.24339e+06	2.29873e+06	1.49102e+06	0	2.04857e+06	2.41084e+06	0	0	2.65528e+06	4.26677e+06	0	0	1.79058e+06	0	5.38319e+06	0	1.27682e+06
Q8WU90	Zinc finger CCCH domain-containing protein 15	ZC3H15	ZC3H15	AENGERSDLEEDNER	S381	1xPhospho [S7]	1.30585e+07	8.15842e+06	8.32263e+06	1.37652e+07	1.12255e+07	1.56237e+06	5.54493e+06	7.17606e+06	0	5.23686e+06	8.18345e+06	1.35667e+07	3.36023e+07	0	3.20352e+06	1.16445e+07	0	1.00259e+07	0	8.35066e+06	2.23442e+07	1.80774e+07	9.25558e+06	8.16379e+06	0	1.62684e+07	9.02157e+06	7.76259e+06	5.21849e+06	3.59766e+06	8.69862e+06	1.12658e+07	0	1.95759e+07	5.15727e+06	2.88134e+06	1.70518e+07	1.17858e+07	9.69201e+06	9.04662e+06	0	0	9.63095e+06
Q8WU90	Zinc finger CCCH domain-containing protein 15	ZC3H15	ZC3H15	KEEKEDEISLEDLIER	S231	1xPhospho [S9]	0	0	0	0	0	0	0	0	0	0	538181	0	0	0	0	0	0	0	0	0	0	0	0	0	0	0	0	398458	0	0	0	0	0	0	0	0	719949	0	0	0	0	0	380947
Q8WU90	Zinc finger CCCH domain-containing protein 15	ZC3H15	ZC3H15	IIEDKTFGLK	T28	1xPhospho [T6]	0	0	0	0	0	0	1.20765e+06	0	0	0	847878	0	0	0	0	0	0	0	0	0	0	0	0	0	0	0	0	0	0	0	0	0	0	0	0	0	0	0	0	0	0	0	591137
Q6PJT7	Zinc finger CCCH domain-containing protein 14	ZC3H14	FLJ11806;ZC3H14	RIPVLSPKPAVAPPAPPSSSQLCR	S665	1xCarbamidomethyl [C23]; 1xPhospho [S6]	0	450680	0	0	0	2.36752e+06	0	0	0	0	0	0	325863	0	0	0	0	0	0	0	875960	0	0	0	0	0	1.33397e+06	796717	0	0	248609	0	0	0	0	0	0	0	0	0	0	0	0
H0YJA2	Zinc finger CCCH domain-containing protein 14 (Fragment)	ZC3H14	FLJ11806;ZC3H14	RIPVLSPKPVAPPAPPSSSQLCR	S581	1xCarbamidomethyl [C22]; 1xPhospho [S6]	0	0	0	0	0	0	0	0	0	0	0	0	0	0	0	0	0	0	0	0	0	0	0	0	0	0	0	0	0	0	0	0	0	0	0	0	0	0	0	0	0	0	0
H0YJA2	Zinc finger CCCH domain-containing protein 14 (Fragment)	ZC3H14	FLJ11806;ZC3H14	DLVQPDKPASPK	S431	1xPhospho [S10]	2.40159e+08	2.58014e+08	2.45534e+08	3.17896e+08	3.17995e+08	2.39592e+08	2.22445e+08	2.41571e+08	1.63139e+08	2.51154e+08	2.9682e+08	1.11746e+08	3.14463e+08	1.64365e+08	2.23826e+08	2.63686e+08	1.73263e+08	1.96404e+08	2.09292e+08	3.5055e+08	2.73977e+08	165575564	3.49885e+08	2.7058e+08	2.49507e+08	2.71293e+08	2.29603e+08	3.37058e+08	2.75001e+08	2.65223e+08	3.61311e+08	315802825	2.40352e+08	2.05779e+08	2.51042e+08	2.075e+08	2.72764e+08	2.84464e+08	2.2013e+08	1.81838e+08	3.50179e+08	3.3824e+08	2.72657e+08
H0YJA2	Zinc finger CCCH domain-containing protein 14 (Fragment)	ZC3H14	FLJ11806;ZC3H14	RPSLPPSK	S259	1xPhospho [S3]	3.27708e+07	2.37403e+07	6.82992e+06	2.62834e+07	3.31724e+07	1.34516e+07	3.49612e+07	4.70899e+07	1.31493e+07	3.23058e+07	2.301e+07	4.11198e+07	1.15721e+07	2.9539e+07	2.38284e+07	36535559	3.22778e+07	3.53207e+07	2.61507e+07	4.31295e+07	3.33189e+07	1.4533e+07	4.25989e+07	3.67277e+07	3.61011e+07	2.80292e+07	3.58103e+07	4.07714e+07	3.74232e+07	3.45188e+07	2.82359e+07	3.45714e+07	7.52504e+07	4.39398e+07	6.0441e+07	4.50457e+07	4.56595e+07	7.08925e+07	2.81131e+07	35999612	2.13089e+07	3.93979e+07	3.60266e+07
H0YJA2	Zinc finger CCCH domain-containing protein 14 (Fragment)	ZC3H14	FLJ11806;ZC3H14	ISPPIKEEETK	S325	1xPhospho [S2]	6.55245e+06	7.77537e+06	1.02075e+07	9.7652e+06	9.29037e+06	5.71383e+06	6.29322e+06	8.81299e+06	5.81827e+06	6.1156e+06	9.59062e+06	4.18689e+06	1.19559e+07	4.62897e+06	3.30897e+06	1.0091e+07	6.01706e+06	7.5016e+06	7.30915e+06	1.0345e+07	9.87116e+06	3.71325e+06	1.12158e+07	1.02593e+07	7.76942e+06	9.30553e+06	7.63584e+06	1.17574e+07	7.89223e+06	5.8936e+06	1.25068e+07	1.1464e+07	5.93115e+06	6.99864e+06	8.27478e+06	7.25348e+06	1.2516e+07	1.01201e+07	2.58948e+06	4.84968e+06	1.00809e+07	1.23096e+07	9.07615e+06
H0YJA2	Zinc finger CCCH domain-containing protein 14 (Fragment)	ZC3H14	FLJ11806;ZC3H14	LMSTVKPLREPAPSEDVIDIKPEPDDLIDEDLNFVQENPLSQK	S73	1xPhospho [S3]; 1xOxidation [M2]	0	0	0	0	0	0	0	0	0	0	97486.2	0	0	0	0	0	0	0	0	0	0	0	0	0	0	0	0	0	0	164671	0	0	0	0	0	0	0	0	0	0	0	0	0
Q5T200	Zinc finger CCCH domain-containing protein 13	ZC3H13	ZC3H13	KGPRTPSPPPPIPEDIALGK	T263	2xPhospho [T5; S7]	0	2.92653e+06	1.09474e+07	2.49379e+06	7.39369e+06	4.74149e+06	7.22082e+06	1.17341e+07	6.40565e+06	783336	5.30834e+06	6.23623e+06	0	0	5.94594e+06	0	235280	3.82621e+06	143735	6.68646e+06	8.79284e+06	0	696009	5.9578e+06	0	0	7.65372e+06	4.46733e+07	1.98761e+07	517823	404755	5.29028e+06	0	0	1.8521e+07	9.37039e+06	1.02718e+07	0	7.80239e+06	5.65579e+06	1.0492e+07	0	5.98743e+06
Q5T200	Zinc finger CCCH domain-containing protein 13	ZC3H13	ZC3H13	KGPRTPSPPPPIPEDIALGK	S265	2xPhospho [T5; S7]	0	2.92653e+06	1.09474e+07	2.49379e+06	7.39369e+06	4.74149e+06	7.22082e+06	1.17341e+07	6.40565e+06	783336	5.30834e+06	6.23623e+06	0	0	5.94594e+06	0	235280	3.82621e+06	143735	6.68646e+06	8.79284e+06	0	696009	5.9578e+06	0	0	7.65372e+06	4.46733e+07	1.98761e+07	517823	404755	5.29028e+06	0	0	1.8521e+07	9.37039e+06	1.02718e+07	0	7.80239e+06	5.65579e+06	1.0492e+07	0	5.98743e+06
Q5T200	Zinc finger CCCH domain-containing protein 13	ZC3H13	ZC3H13	SKGDSDISDEEAAQQSK	S1017	1xPhospho [S8]	0	1.68814e+06	0	0	0	0	0	0	0	0	0	0	0	0	3.24873e+06	0	1.83396e+06	0	0	0	0	0	0	0	1.2352e+06	0	0	2.3032e+06	0	0	0	0	0	0	0	0	3.36765e+06	0	0	0	0	0	0
Q5T200	Zinc finger CCCH domain-containing protein 13	ZC3H13	ZC3H13	SKGDSDISDEEAAQQSK	S1014	2xPhospho [S5; S8]	0	0	0	0	0	3.34163e+06	0	1.17124e+06	2.94532e+06	0	1.259e+06	0	5.72022e+06	0	0	0	0	1.762e+06	1.60273e+06	3.66392e+06	0	0	3.2376e+06	0	5.22747e+06	2.96052e+06	0	1.3432e+07	0	1.95552e+06	4.65292e+06	6.66833e+06	0	0	1.89269e+06	0	4.3281e+06	2.55037e+06	1.68601e+06	3.13902e+06	7.57194e+06	4.79463e+06	2.71499e+06
Q5T200	Zinc finger CCCH domain-containing protein 13	ZC3H13	ZC3H13	SKGDSDISDEEAAQQSK	S1017	2xPhospho [S5; S8]	0	0	0	0	0	3.34163e+06	0	1.17124e+06	2.94532e+06	0	1.259e+06	0	5.72022e+06	0	0	0	0	1.762e+06	1.60273e+06	3.66392e+06	0	0	3.2376e+06	0	5.22747e+06	2.96052e+06	0	1.3432e+07	0	1.95552e+06	4.65292e+06	6.66833e+06	0	0	1.89269e+06	0	4.3281e+06	2.55037e+06	1.68601e+06	3.13902e+06	7.57194e+06	4.79463e+06	2.71499e+06
Q5T200	Zinc finger CCCH domain-containing protein 13	ZC3H13	ZC3H13	GNIETTSEDGQVFSPKK	S993	1xPhospho [S14]	0	1.96733e+06	1.02795e+06	1.50227e+06	1.31385e+06	0	2.20928e+06	2.88319e+06	0	2.89059e+06	2.23866e+06	0	2.04588e+06	0	0	1.27926e+06	0	1.43916e+06	0	3.11034e+06	1.00118e+06	2.51402e+06	2.96389e+06	1.28942e+06	1.87484e+06	0	0	4.99143e+06	1.97221e+06	1.60465e+06	0	1.77111e+06	0	0	0	0	1.40597e+06	2.46854e+06	1.50775e+06	2.24067e+06	2.14276e+06	0	2.75151e+06
Q5T200	Zinc finger CCCH domain-containing protein 13	ZC3H13	ZC3H13	GPRTPSPPPPIPEDIALGKK	T263	2xPhospho [T4; S6]	0	1.32591e+06	1.96192e+06	0	0	0	0	4.21685e+06	0	0	2.2171e+06	0	0	0	4.33119e+06	0	0	0	0	0	0	0	0	1.97248e+06	5.15474e+06	0	4.97447e+06	9.74882e+06	4.98379e+06	0	0	2.64955e+06	0	465127	0	0	0	0	6.154e+06	4.04761e+06	2.27066e+06	0	0
Q5T200	Zinc finger CCCH domain-containing protein 13	ZC3H13	ZC3H13	GPRTPSPPPPIPEDIALGKK	S265	2xPhospho [T4; S6]	0	1.32591e+06	1.96192e+06	0	0	0	0	4.21685e+06	0	0	2.2171e+06	0	0	0	4.33119e+06	0	0	0	0	0	0	0	0	1.97248e+06	5.15474e+06	0	4.97447e+06	9.74882e+06	4.98379e+06	0	0	2.64955e+06	0	465127	0	0	0	0	6.154e+06	4.04761e+06	2.27066e+06	0	0
Q5T200	Zinc finger CCCH domain-containing protein 13	ZC3H13	ZC3H13	GPRTPSPPPPIPEDIALGK	T263	2xPhospho [T4; S6]	414590	2.17105e+06	1.24661e+07	2.43361e+06	62263.8	0	0	2.57468e+07	856334	1.30182e+06	0	154289	337530	1.32217e+06	8.15761e+06	374959	393712	0	819441	228894	0	0	195280	0	0	216643	96688.7	6.86053e+07	75242.5	161314	45162.1	0	0	89430.6	147260	21419.5	2.75393e+06	623020	0	0	221172	0	2.31067e+07
Q5T200	Zinc finger CCCH domain-containing protein 13	ZC3H13	ZC3H13	GPRTPSPPPPIPEDIALGK	S265	2xPhospho [T4; S6]	414590	2.17105e+06	1.24661e+07	2.43361e+06	62263.8	0	0	2.57468e+07	856334	1.30182e+06	0	154289	337530	1.32217e+06	8.15761e+06	374959	393712	0	819441	228894	0	0	195280	0	0	216643	96688.7	6.86053e+07	75242.5	161314	45162.1	0	0	89430.6	147260	21419.5	2.75393e+06	623020	0	0	221172	0	2.31067e+07
Q5T200	Zinc finger CCCH domain-containing protein 13	ZC3H13	ZC3H13	TPSPPPPIPEDIALGK	S265	1xPhospho [S3]	0	537693	418434	754910	59260.2	0	47213	0	0	0	0	0	0	0	1.57734e+06	0	0	0	0	72473.4	0	0	0	0	0	0	0	2.57053e+07	0	0	0	0	0	0	0	0	0	0	0	0	0	0	2.33717e+06
Q5T200	Zinc finger CCCH domain-containing protein 13	ZC3H13	ZC3H13	TPSPPPPIPEDIALGK	T263	2xPhospho [T1; S3]	340174	3.00959e+06	2.17643e+06	2.69708e+06	166978	475559	348602	249236	371586	325663	154162	346595	101599	236099	2.44929e+06	82161.7	106284	236286	148087	170831	263779	132907	54642.6	125890	0	461802	141612	262604	167919	0	288202	90469.9	273625	0	81932.4	1.18142e+06	226600	291433	580674	393759	0	0	310778
Q5T200	Zinc finger CCCH domain-containing protein 13	ZC3H13	ZC3H13	TPSPPPPIPEDIALGK	S265	2xPhospho [T1; S3]	340174	3.00959e+06	2.17643e+06	2.69708e+06	166978	475559	348602	249236	371586	325663	154162	346595	101599	236099	2.44929e+06	82161.7	106284	236286	148087	170831	263779	132907	54642.6	125890	0	461802	141612	262604	167919	0	288202	90469.9	273625	0	81932.4	1.18142e+06	226600	291433	580674	393759	0	0	310778
Q5T200	Zinc finger CCCH domain-containing protein 13	ZC3H13	ZC3H13	TPSPPPPIPEDIALGKK	S265	1xPhospho [S3]	0	0	0	0	0	0	578953	0	0	0	0	0	0	0	647556	0	0	0	0	0	697616	0	0	0	0	0	0	2.07548e+06	851682	0	0	0	0	0	741821	0	0	0	1.13979e+06	0	0	0	0
Q5T200	Zinc finger CCCH domain-containing protein 13	ZC3H13	ZC3H13	TPSPPPPIPEDIALGKK	T263	2xPhospho [T1; S3]	180270	1.15329e+06	1.12751e+06	1.15396e+06	154785	0	5.99083e+06	4.88272e+06	126002	0	37562.4	0	0	291105	3.90211e+06	125353	0	56012.4	125603	0	64872.2	0	54535.7	0	0	52810	0	8.06044e+06	3.58906e+06	0	0	0	0	0	3.71746e+06	1.1671e+06	2.10027e+06	0	2.08801e+06	0	0	0	2.82909e+06
Q5T200	Zinc finger CCCH domain-containing protein 13	ZC3H13	ZC3H13	TPSPPPPIPEDIALGKK	S265	2xPhospho [T1; S3]	180270	1.15329e+06	1.12751e+06	1.15396e+06	154785	0	5.99083e+06	4.88272e+06	126002	0	37562.4	0	0	291105	3.90211e+06	125353	0	56012.4	125603	0	64872.2	0	54535.7	0	0	52810	0	8.06044e+06	3.58906e+06	0	0	0	0	0	3.71746e+06	1.1671e+06	2.10027e+06	0	2.08801e+06	0	0	0	2.82909e+06
Q5T200	Zinc finger CCCH domain-containing protein 13	ZC3H13	ZC3H13	KEVSPEVVR	S198	1xPhospho [S4]	2.6916e+07	4.37144e+07	2.6271e+07	5.76754e+07	4.26195e+07	3.36748e+07	3.38324e+07	26275204	2.0368e+07	3.12629e+07	2.1724e+07	1.69893e+07	3.28599e+07	2.67103e+07	3.64234e+07	5.26984e+07	3.14347e+07	3.5859e+07	3.17218e+07	4.12339e+07	4.80598e+07	7.12708e+07	4.12794e+07	3.66224e+07	4.81211e+07	2.70977e+07	3.1275e+07	6.71555e+07	2.82254e+07	1.76811e+07	2.89301e+07	3.71286e+07	3.52119e+07	3.18552e+07	2.82417e+07	1.43769e+07	3.4265e+07	3.0816e+07	2.18599e+07	2.2055e+07	2.13584e+07	3.58195e+07	3.47595e+07
Q5T200	Zinc finger CCCH domain-containing protein 13	ZC3H13	ZC3H13	GPRTPPITTK	T1033	1xPhospho [T4]	1.79091e+07	1.47801e+07	9.58161e+06	2.18854e+07	2.8275e+07	1.67684e+07	1.93744e+07	1.57786e+07	1.46101e+07	1.71729e+07	1.54157e+07	2.02947e+07	3.9725e+06	3.07323e+06	1.51292e+07	2.21387e+07	2.59584e+07	2.20067e+07	2.28167e+07	3.04861e+07	5.79773e+07	3.06153e+07	2.3177e+07	3.69342e+07	3.28442e+07	1.9403e+07	2.4535e+07	5.12809e+07	4.11056e+07	1.63203e+07	1.61798e+07	2.42683e+07	0	2.60855e+07	2.67723e+07	1.35071e+07	3.74157e+07	2.23988e+07	1.0064e+07	6.49775e+06	1.25275e+07	4.90751e+06	2.39262e+07
Q5T200	Zinc finger CCCH domain-containing protein 13	ZC3H13	ZC3H13	GNIETTSEDGQVFSPK	S993	2xPhospho [S14; S/T]	0	2.38715e+06	1.93984e+06	1.46627e+06	916419	0	1.08972e+06	2.11794e+06	0	1.86629e+06	856948	0	0	0	1.9573e+06	0	0	0	0	0	0	0	2.06309e+07	963291	0	1.20975e+06	0	6.64837e+06	0	0	0	0	0	0	1.59959e+06	0	0	0	0	0	0	0	0
Q5T200	Zinc finger CCCH domain-containing protein 13	ZC3H13	ZC3H13	STSPAGQHHSPISSR	S318	2xPhospho [S3; S]	0	1.69498e+06	0	0	0	1.1244e+06	0	0	2.24732e+06	0	0	0	0	0	2.05078e+06	2.10017e+06	0	3.08531e+06	1.83922e+06	408909	0	5.57614e+06	0	0	0	4.51244e+06	0	3.6384e+06	0	0	0	0	0	0	2.16314e+06	0	490925	1.6423e+06	0	0	3.60644e+06	0	0
Q5T200	Zinc finger CCCH domain-containing protein 13	ZC3H13	ZC3H13	SKLSPSPSLR	S207	1xPhospho [S4]	1.11412e+08	4.7075e+07	7.29592e+07	8.68229e+07	9.5217e+07	1.12158e+08	1.06439e+08	1.33015e+08	8.41853e+07	8.75074e+07	7.09325e+07	1.14833e+08	1.78218e+08	9.04531e+07	1.58697e+08	1.0297e+08	1.01675e+08	1.23121e+08	1.16277e+08	145889846	1.36546e+08	7.09095e+07	9.88934e+07	1.89134e+08	1.90405e+08	9.63949e+07	1.15759e+08	2.2769e+08	1.94237e+08	9.78752e+07	8.83828e+07	1.02295e+08	1.1697e+08	1.92974e+08	1.67791e+08	8.70264e+07	1.71982e+08	7.79043e+07	1.29505e+08	1.45493e+08	1.07685e+08	3.39068e+07	1.66156e+08
Q5T200	Zinc finger CCCH domain-containing protein 13	ZC3H13	ZC3H13	SLSPSHLTEDR	S875	2xPhospho [S1; S3]	1.39349e+07	8.19647e+06	9.31475e+06	1.6397e+07	7.287e+06	7.1074e+06	9.73543e+06	1.52403e+07	1.32046e+07	2.54576e+07	1.34345e+07	1.08495e+07	7.9945e+06	0	1.53746e+07	1.6949e+07	1.78408e+07	1.18013e+07	1.98613e+07	9.38701e+06	6.9467e+06	8.68098e+06	1.40787e+07	9.37645e+06	1.30662e+07	1.68011e+07	8.81765e+06	1.27606e+07	6.25449e+06	1.82567e+07	2.36881e+07	1.0407e+07	0	1.10503e+06	2.52831e+06	5.91492e+06	6.89205e+06	1.20804e+07	9.72187e+06	1.18149e+07	8.51694e+06	1.19206e+07	9.07117e+06
Q5T200	Zinc finger CCCH domain-containing protein 13	ZC3H13	ZC3H13	SLSPSHLTEDR	S877	2xPhospho [S1; S3]	1.39349e+07	8.19647e+06	9.31475e+06	1.6397e+07	7.287e+06	7.1074e+06	9.73543e+06	1.52403e+07	1.32046e+07	2.54576e+07	1.34345e+07	1.08495e+07	7.9945e+06	0	1.53746e+07	1.6949e+07	1.78408e+07	1.18013e+07	1.98613e+07	9.38701e+06	6.9467e+06	8.68098e+06	1.40787e+07	9.37645e+06	1.30662e+07	1.68011e+07	8.81765e+06	1.27606e+07	6.25449e+06	1.82567e+07	2.36881e+07	1.0407e+07	0	1.10503e+06	2.52831e+06	5.91492e+06	6.89205e+06	1.20804e+07	9.72187e+06	1.18149e+07	8.51694e+06	1.19206e+07	9.07117e+06
Q5T200	Zinc finger CCCH domain-containing protein 13	ZC3H13	ZC3H13	TKSLEITGER	S1240	1xPhospho [S3]	4.99497e+06	5.17742e+06	1.21149e+07	7.53468e+06	4.16915e+06	6.1921e+06	5.5786e+06	4.55541e+06	3.3435e+06	9.3904e+06	7.561e+06	6.56624e+06	6.16745e+06	0	6.93054e+06	5.20159e+06	4.71352e+06	4.25599e+06	3.5973e+06	5.15243e+06	4.11372e+06	3.06834e+06	4.86884e+06	3.12268e+06	5.54768e+06	6.68452e+06	1.20368e+07	7.01645e+06	4.94274e+06	5.62192e+06	6.08764e+06	3.01085e+06	0	0	4.49131e+06	4.42733e+06	4.74428e+06	4.47863e+06	3.35484e+06	6.07538e+06	4.65456e+06	5.4404e+06	4.74488e+06
Q5T200	Zinc finger CCCH domain-containing protein 13	ZC3H13	ZC3H13	SKLSPSPSLR	S207	2xPhospho [S4; S6]	6.52447e+07	5.73398e+07	7.68416e+07	6.75333e+07	5.75184e+07	2.09491e+07	7.35954e+07	1.06803e+08	2.87681e+07	5.2784e+07	7.83071e+07	2.09095e+07	55516550	1.46335e+07	4.95578e+07	5.06003e+07	3.68838e+07	5.75569e+07	1.24924e+07	8.50972e+07	2.60952e+07	5.28858e+07	5.85975e+07	3.55798e+07	4.61404e+07	8.44525e+07	5.14292e+07	2.25625e+08	4.92501e+07	5.58396e+06	1.56932e+08	6.96429e+07	4.27157e+07	4.89686e+07	3.07976e+07	4.24685e+07	8.39014e+07	4.74008e+07	3.68325e+07	5.81079e+07	5.05438e+07	1.29895e+08	8.1095e+07
Q5T200	Zinc finger CCCH domain-containing protein 13	ZC3H13	ZC3H13	SKLSPSPSLR	S209	2xPhospho [S4; S6]	6.52447e+07	5.73398e+07	7.68416e+07	6.75333e+07	5.75184e+07	2.09491e+07	7.35954e+07	1.06803e+08	2.87681e+07	5.2784e+07	7.83071e+07	2.09095e+07	55516550	1.46335e+07	4.95578e+07	5.06003e+07	3.68838e+07	5.75569e+07	1.24924e+07	8.50972e+07	2.60952e+07	5.28858e+07	5.85975e+07	3.55798e+07	4.61404e+07	8.44525e+07	5.14292e+07	2.25625e+08	4.92501e+07	5.58396e+06	1.56932e+08	6.96429e+07	4.27157e+07	4.89686e+07	3.07976e+07	4.24685e+07	8.39014e+07	4.74008e+07	3.68325e+07	5.81079e+07	5.05438e+07	1.29895e+08	8.1095e+07
Q5T200	Zinc finger CCCH domain-containing protein 13	ZC3H13	ZC3H13	DKPRSTSPAGQHHSPISSR	S316	3xPhospho [S5; S7; S14]	0	0	0	0	0	0	0	0	0	0	0	8.09976e+06	9.56183e+06	0	0	0	0	0	0	5.65278e+06	0	0	0	0	0	0	0	4.91636e+06	0	0	0	5.62965e+06	0	0	0	0	0	0	0	0	1.95911e+07	0	3.55956e+06
Q5T200	Zinc finger CCCH domain-containing protein 13	ZC3H13	ZC3H13	DKPRSTSPAGQHHSPISSR	S318	3xPhospho [S5; S7; S14]	0	0	0	0	0	0	0	0	0	0	0	8.09976e+06	9.56183e+06	0	0	0	0	0	0	5.65278e+06	0	0	0	0	0	0	0	4.91636e+06	0	0	0	5.62965e+06	0	0	0	0	0	0	0	0	1.95911e+07	0	3.55956e+06
Q5T200	Zinc finger CCCH domain-containing protein 13	ZC3H13	ZC3H13	DKPRSTSPAGQHHSPISSR	S325	3xPhospho [S5; S7; S14]	0	0	0	0	0	0	0	0	0	0	0	8.09976e+06	9.56183e+06	0	0	0	0	0	0	5.65278e+06	0	0	0	0	0	0	0	4.91636e+06	0	0	0	5.62965e+06	0	0	0	0	0	0	0	0	1.95911e+07	0	3.55956e+06
Q5T200	Zinc finger CCCH domain-containing protein 13	ZC3H13	ZC3H13	RGPRTPPITTK	T1033	1xPhospho [T5]	0	0	0	0	1.12943e+06	897692	1.34563e+06	0	1.06159e+06	0	0	1.65901e+06	1.79689e+06	0	1.15076e+06	0	2.30776e+06	2.00875e+06	2.22618e+06	2.19014e+06	2.19835e+06	0	0	2.00286e+06	3.0373e+06	1.34178e+06	2.20806e+06	8.24572e+06	2.85018e+06	0	0	1.98223e+06	0	0	0	0	3.05817e+06	1.77923e+06	1.3884e+06	0	0	0	985739
Q5T200	Zinc finger CCCH domain-containing protein 13	ZC3H13	ZC3H13	DLESTSRDSLALDKER	S1406	2xPhospho [S6; S9]	0	0	0	0	0	0	0	0	0	0	0	5.09144e+06	0	0	0	0	0	0	0	0	0	0	0	0	0	0	0	3.23059e+06	0	0	0	0	0	873589	0	0	0	0	0	0	0	0	1.56331e+06
Q5T200	Zinc finger CCCH domain-containing protein 13	ZC3H13	ZC3H13	DLESTSRDSLALDKER	S1409	2xPhospho [S6; S9]	0	0	0	0	0	0	0	0	0	0	0	5.09144e+06	0	0	0	0	0	0	0	0	0	0	0	0	0	0	0	3.23059e+06	0	0	0	0	0	873589	0	0	0	0	0	0	0	0	1.56331e+06
Q5T200	Zinc finger CCCH domain-containing protein 13	ZC3H13	ZC3H13	SKLSPSPSLRK	S207	2xPhospho [S4; S6]	8.98497e+06	2.40779e+07	2.37504e+07	3.0864e+07	3.15048e+07	5.52485e+06	3.20462e+07	3.72039e+07	1.90038e+07	2.61768e+07	3.00156e+07	1.8492e+07	4.66923e+07	1.21589e+07	1.99378e+07	2.53857e+07	3.03875e+07	3.23614e+07	8.95994e+06	3.60387e+07	1.47022e+07	24751744	2.14384e+07	1.78943e+07	2.80267e+07	2.70005e+07	2.23839e+07	5.1414e+07	2.76461e+07	1.39109e+07	3.47764e+07	3.3644e+07	1.40498e+07	2.93909e+07	2.0257e+07	1.03057e+07	2.09384e+07	1.70816e+07	2.36762e+07	8.96362e+06	7.31151e+06	1.2312e+07	1.40123e+07
Q5T200	Zinc finger CCCH domain-containing protein 13	ZC3H13	ZC3H13	SKLSPSPSLRK	S209	2xPhospho [S4; S6]	8.98497e+06	2.40779e+07	2.37504e+07	3.0864e+07	3.15048e+07	5.52485e+06	3.20462e+07	3.72039e+07	1.90038e+07	2.61768e+07	3.00156e+07	1.8492e+07	4.66923e+07	1.21589e+07	1.99378e+07	2.53857e+07	3.03875e+07	3.23614e+07	8.95994e+06	3.60387e+07	1.47022e+07	24751744	2.14384e+07	1.78943e+07	2.80267e+07	2.70005e+07	2.23839e+07	5.1414e+07	2.76461e+07	1.39109e+07	3.47764e+07	3.3644e+07	1.40498e+07	2.93909e+07	2.0257e+07	1.03057e+07	2.09384e+07	1.70816e+07	2.36762e+07	8.96362e+06	7.31151e+06	1.2312e+07	1.40123e+07
Q5T200	Zinc finger CCCH domain-containing protein 13	ZC3H13	ZC3H13	SPERPTGDLR	S77	1xPhospho [S1]	8.62287e+07	9.52276e+07	7.32801e+07	1.2631e+08	1.10562e+08	7.18137e+07	1.01347e+08	8.98836e+07	5.25947e+07	8.33128e+07	8.31188e+07	6.65215e+07	121617691	8.99294e+07	8.93582e+07	9.67455e+07	8.86588e+07	1.158e+08	6.95149e+07	1.33695e+08	1.30692e+08	1.67045e+08	1.03811e+08	1.16193e+08	1.17918e+08	9.46074e+07	1.05165e+08	2.31018e+08	1.02104e+08	7.35161e+07	1.10258e+08	1.26749e+08	1.17926e+08	4.15054e+07	1.09508e+08	6.22687e+07	1.27143e+08	1.24438e+08	7.11997e+07	5.56731e+07	7.61305e+07	9.34734e+07	9.91053e+07
Q5T200	Zinc finger CCCH domain-containing protein 13	ZC3H13	ZC3H13	EVSPEVVR	S198	1xPhospho [S3]	9.27436e+07	1.70712e+08	1.47041e+08	1.88986e+08	110137972	8.22436e+07	100332085	101834662	7.72937e+07	1.15515e+08	9.21083e+07	4.96813e+07	9.48468e+07	5.82025e+07	131430796	1.1741e+08	8.93372e+07	1.0047e+08	7.90196e+07	1.33366e+08	1.07801e+08	1.76654e+08	112247269	9.99612e+07	9.98807e+07	1.01442e+08	1.0093e+08	2.25241e+08	9.14557e+07	6.96037e+07	1.28555e+08	1.38725e+08	1.18064e+08	1.34009e+08	1.04665e+08	5.47239e+07	138731418	8.55678e+07	9.22391e+07	7.90826e+07	7.10586e+07	1.37416e+08	1.24978e+08
Q5T200	Zinc finger CCCH domain-containing protein 13	ZC3H13	ZC3H13	FVHGPSPR	S64	1xPhospho [S6]	3.98383e+06	4.48616e+06	3.48938e+06	5.23207e+06	5.04313e+06	4.38654e+06	4.46536e+06	4.99858e+06	2.7637e+06	0	6.33396e+06	3.83244e+06	9.34962e+06	3.87059e+06	2.6229e+06	2.96878e+06	7.88688e+06	5.13762e+06	0	1.06754e+07	7.75357e+06	3.73025e+06	5.60599e+06	1.13619e+07	5.21513e+06	9.50818e+06	9.37503e+06	2.78901e+07	6.93607e+06	2.91949e+06	4.00796e+06	9.68195e+06	0	8.2457e+06	7.31567e+06	7.48667e+06	1.28807e+07	7.096e+06	5.97188e+06	0	2.54729e+06	0	4.357e+06
Q5T200	Zinc finger CCCH domain-containing protein 13	ZC3H13	ZC3H13	RPSVFER	S25	1xPhospho [S3]	7.74053e+06	5.45308e+06	487565	6.87541e+06	6.11229e+06	1.5767e+06	6.50998e+06	1.13326e+07	4.75986e+06	1.28453e+07	8.79804e+06	1.23012e+07	0	1.56335e+07	2.70843e+06	5.21427e+06	1.0847e+07	5.16934e+06	5.18177e+06	2.34489e+06	6.94107e+06	0	1.30342e+06	1.25368e+06	3.89876e+06	0	2.91729e+06	1.71143e+07	4.07076e+06	7.20882e+06	0	0	1.69487e+07	7.61111e+06	0	8.95028e+06	1.04174e+07	2.51501e+06	1.29272e+06	0	3.69134e+06	5.24537e+06	5.36199e+06
Q5T200	Zinc finger CCCH domain-containing protein 13	ZC3H13	ZC3H13	LISDSVERDR	S1366	1xPhospho [S5]	2.60275e+07	4.6142e+06	1.10515e+07	1.06437e+07	1.4112e+07	6.1192e+06	1.88764e+07	3.00495e+07	6.05286e+06	1.09154e+07	2.45706e+07	1.71166e+07	1.55642e+07	1.59696e+07	7.27693e+06	9.76827e+06	2.67633e+07	1.33419e+07	5.97847e+06	1.65797e+07	1.6914e+07	3.52905e+06	1.22934e+07	1.32351e+07	2.31221e+07	1.20169e+07	2.22973e+07	2.6819e+07	2.09526e+07	1.15321e+07	1.0874e+07	1.18723e+07	0	7.40758e+06	1.49905e+07	1.22346e+07	4.68152e+07	1.84719e+07	2.8585e+07	2.51338e+07	2.04245e+07	1.52247e+07	2.51722e+07
Q5T200	Zinc finger CCCH domain-containing protein 13	ZC3H13	ZC3H13	MDKDLGSVQGFEETNK	S1423	1xPhospho [S7]; 1xOxidation [M1]	1.57402e+06	0	0	0	0	0	0	0	0	0	0	0	0	0	0	0	0	0	0	0	0	0	0	0	826803	1.11211e+06	0	0	0	0	0	1.06558e+06	0	0	0	921297	0	0	0	0	0	2.35104e+06	1.48472e+06
A2A288	Probable ribonuclease ZC3H12D	ZC3H12D	ZC3H12D;FLJ00361	DLHGDLLSPR	S428	1xPhospho [S8]	1.92493e+06	0	0	0	0	0	0	0	0	0	3.06869e+06	0	1.06616e+06	0	0	0	0	0	0	2.43088e+06	0	0	1.28096e+06	0	0	803743	0	831050	1.14719e+06	0	1.2847e+06	2.53244e+06	0	0	935810	1.69326e+06	4.11319e+06	1.03101e+06	1.72563e+06	2.87786e+06	1.61827e+06	2.4094e+06	1.92751e+06
E9PP00	Probable ribonuclease ZC3H12C	ZC3H12C	ZC3H12C	RFSLDTDYR	S581	1xPhospho [S3]	9.30312e+06	6.37208e+06	5.47988e+06	4.67618e+06	6.9626e+06	3.8024e+06	7.04322e+06	5.86913e+06	8.02625e+06	1.02926e+07	8.27912e+06	8.24053e+06	4.61328e+06	0	9.25135e+06	6.33974e+06	8.91579e+06	7.04419e+06	8.78984e+06	3.2305e+06	6.58982e+06	3.05593e+06	5.73558e+06	4.64086e+06	6.17287e+06	4.14646e+06	7.82999e+06	3.26701e+06	5.01795e+06	8.09566e+06	6.58698e+06	6.19408e+06	0	3.73532e+06	4.5651e+06	953329	6.3463e+06	5.46468e+06	7.33884e+06	9.60834e+06	5.00702e+06	1.25912e+07	8.10643e+06
E9PP00	Probable ribonuclease ZC3H12C	ZC3H12C	ZC3H12C	SPCLEPHILK	S92	1xCarbamidomethyl [C3]; 1xPhospho [S1]	0	0	0	0	0	742737	725988	603133	959661	0	1.09465e+06	0	0	0	777053	0	0	0	549243	0	0	0	531156	0	0	0	610896	840623	654978	0	0	381495	0	0	0	444657	0	0	0	0	0	0	0
Q5D1E8	Endoribonuclease ZC3H12A	ZC3H12A	ZC3H12A	QTSPDPCPQLPLVPR	S99	1xCarbamidomethyl [C7]; 1xPhospho [S3]	130699	0	0	0	0	0	45857.9	0	0	0	0	0	0	0	0	0	0	0	0	0	0	133957	0	0	0	83856.4	66349.3	979269	0	0	0	80802.4	0	92946	0	0	0	0	0	0	0	0	0
Q5D1E8	Endoribonuclease ZC3H12A	ZC3H12A	ZC3H12A	EYWSEPYPLPPPTSVLQEPPVQSPGAGR	Y514	1xPhospho [Y2]	0	0	595390	0	100214	164746	0	0	0	0	87559.9	0	0	0	0	163539	175647	0	0	0	0	0	0	0	0	56628.6	0	36080.8	0	241289	0	0	0	0	0	0	0	0	0	0	0	0	0
Q5D1E8	Endoribonuclease ZC3H12A	ZC3H12A	ZC3H12A	RPSPSSQSSSLLTESEQCSLDGK	S359	1xCarbamidomethyl [C18]; 1xPhospho [S3]	0	0	1.29015e+06	0	0	0	844629	0	0	0	0	0	0	0	0	0	0	0	0	0	0	0	0	0	0	0	0	909241	0	1.06275e+06	0	0	0	0	0	1.81208e+06	0	1.13339e+06	1.46662e+06	0	0	0	0
Q96GY0	Zinc finger C2HC domain-containing protein 1A	ZC2HC1A	ZC2HC1A	GIEGHSPGNLPK	S292	1xPhospho [S6]	3.3099e+07	1.54913e+07	8.08109e+06	2.28341e+07	1.85131e+07	2.56227e+07	2.35063e+07	25985411	3.04328e+07	3.80852e+07	3.02993e+07	6.06013e+07	2.17141e+07	5.92274e+07	2.85827e+07	1.99245e+07	3.8623e+07	2.63307e+07	5.60834e+07	3.2112e+07	2.37897e+07	1.8933e+07	2.59372e+07	5.19472e+07	3.71994e+07	2.71277e+07	3.62212e+07	2.0654e+07	3.31661e+07	2.99011e+07	2.83935e+07	2.57899e+07	1.92278e+07	1.54715e+07	3.36499e+07	3.10821e+07	1.09172e+07	2.49136e+07	1.14896e+07	2.56846e+07	3.54075e+07	1.56009e+07	45099550
Q96BR9	Zinc finger and BTB domain-containing protein 8A	ZBTB8A	ZBTB8A	SHLSPEQGTGIISGK	S167	1xPhospho [S4]	0	0	1.01046e+06	1.7814e+06	0	1.93401e+06	1.04864e+06	1.78301e+06	0	0	773696	0	1.62026e+06	0	1.04711e+06	0	0	0	0	2.61595e+06	947355	3.79704e+06	1.64503e+06	1.94089e+06	0	1.30682e+06	1.16915e+06	2.98236e+06	775094	4.70769e+06	0	0	0	0	0	0	972030	0	1.25152e+06	1.07431e+06	0	0	1.99642e+06
Q96BR9	Zinc finger and BTB domain-containing protein 8A	ZBTB8A	ZBTB8A	SSFYSGGWQEGSSSPR	S161	1xPhospho [S14]	0	0	1.59599e+06	1.27526e+06	2.02068e+06	0	1.94097e+06	2.37305e+06	0	0	1.26914e+06	0	0	0	1.74848e+06	0	1.17427e+06	0	0	4.40413e+06	3.34586e+06	0	2.37001e+06	5.27671e+06	0	2.80866e+06	0	4.08958e+06	1.74103e+06	0	1.92935e+06	1.84839e+06	0	2.80408e+06	2.32351e+06	1.69928e+06	2.1549e+06	0	0	0	0	0	1.91999e+06
O95365	Zinc finger and BTB domain-containing protein 7A	ZBTB7A	ZBTB7A	HFKDEDEDEDVASPDGLGR	S549	1xPhospho [S13]	4.36073e+07	3.49007e+07	4.00175e+07	3.12021e+07	2.23171e+07	0	4.2466e+07	2.84949e+07	0	1.4763e+07	4.24469e+07	8.62561e+06	2.11919e+07	0	4.06516e+06	8.02048e+06	1.61336e+07	0	1.25288e+07	5.27633e+07	7.92545e+06	0	2.37485e+07	1.34058e+07	2.86949e+07	5.19539e+07	2.27539e+07	3.06097e+07	2.85973e+07	1.65631e+07	5.81277e+07	3.70144e+07	0	1.62968e+07	3.33083e+07	1.92362e+07	5.95668e+07	3.74271e+07	3.4129e+07	3.32066e+07	4.94507e+06	4.90379e+07	3.04998e+07
O95365	Zinc finger and BTB domain-containing protein 7A	ZBTB7A	ZBTB7A	GGAPDPSPGATATPGAPAQPSSPDAR	S511	2xPhospho [S7; S21]	0	0	0	0	716629	0	0	0	0	0	0	0	0	0	0	0	0	2.25194e+06	0	1.63007e+06	0	0	0	967835	0	0	0	0	0	0	1.49254e+06	0	0	0	0	1.96091e+06	4.19007e+06	0	0	0	0	0	1.22261e+06
O95365	Zinc finger and BTB domain-containing protein 7A	ZBTB7A	ZBTB7A	GGAPDPSPGATATPGAPAQPSSPDAR	S525	2xPhospho [S7; S21]	0	0	0	0	716629	0	0	0	0	0	0	0	0	0	0	0	0	2.25194e+06	0	1.63007e+06	0	0	0	967835	0	0	0	0	0	0	1.49254e+06	0	0	0	0	1.96091e+06	4.19007e+06	0	0	0	0	0	1.22261e+06
O15062	Zinc finger and BTB domain-containing protein 5	ZBTB5	ZBTB5	ATQVETSFDQEAAPEK	S298	1xPhospho [S7]	3.94027e+06	1.7252e+06	5.49881e+06	958646	4.34414e+06	5.59309e+06	2.0844e+06	4.22216e+06	0	0	2.05072e+06	3.37671e+06	4.15936e+06	0	2.70236e+06	0	2.74559e+06	0	0	1.97412e+06	0	0	1.84839e+06	0	947165	955207	800045	3.27835e+06	0	0	0	1.05955e+06	0	0	1.79238e+06	0	0	1.43918e+06	885370	3.37691e+06	0	6.77782e+06	9.40104e+06
O15062	Zinc finger and BTB domain-containing protein 5	ZBTB5	ZBTB5	IDLSPESSDR	S371	1xPhospho [S4]	2.27404e+06	3.68324e+06	4.7176e+06	2.63989e+06	3.25399e+06	2.30191e+06	3.18818e+06	2.87162e+06	1.68101e+06	4.59898e+06	4.36256e+06	1.20705e+06	3.86211e+06	0	0	3.64614e+06	3.44145e+06	4.59895e+06	0	5.41712e+06	2.82487e+06	1.5322e+06	4.11308e+06	3.64152e+06	3.29065e+06	4.18739e+06	2.42496e+06	1.31195e+07	4.17484e+06	5.08729e+06	4.41036e+06	3.66591e+06	0	5.73304e+06	3.17464e+06	2.02748e+06	2.65567e+06	3.31433e+06	2.01541e+06	3.51489e+06	4.23335e+06	7.08517e+06	3.69433e+06
O15062	Zinc finger and BTB domain-containing protein 5	ZBTB5	ZBTB5	TLPMSPPSER	S127	1xPhospho [S5]	634977	1.45505e+06	370539	0	618736	675926	790567	1.1397e+06	0	0	665195	0	0	0	1.38993e+06	0	0	0	0	820198	639822	0	734056	767593	680980	1.11371e+06	546072	5.07035e+06	681060	1.43439e+06	819669	0	0	1.05396e+06	0	507148	540795	0	754394	1.78483e+06	1.73079e+06	0	1.55606e+06
Q9UFB7	Zinc finger and BTB domain-containing protein 47	ZBTB47	ZBTB47	LEGGEELEEELGGSGTYSR	S223	1xPhospho [S14]	0	0	0	880390	0	0	0	0	0	0	0	0	0	389974	0	126303	199894	2.10132e+06	0	0	0	0	0	0	0	1.15576e+06	0	681370	0	491153	1.7238e+06	0	0	1.10933e+06	1.58246e+06	1.4573e+06	804253	0	0	0	0	0	0
Q9UFB7	Zinc finger and BTB domain-containing protein 47	ZBTB47	ZBTB47	RRGTPEPEEAGR	T390	1xPhospho [T4]	0	0	0	0	0	0	0	0	0	0	0	0	0	0	0	0	0	0	0	0	0	0	0	0	0	0	0	0	0	0	0	0	0	0	0	0	0	846346	0	0	0	0	0
Q9UFB7	Zinc finger and BTB domain-containing protein 47	ZBTB47	ZBTB47	RGTPEPEEAGR	T390	1xPhospho [T3]	1.56816e+07	1.1383e+07	2.19793e+07	2.88232e+07	0	0	0	0	0	0	0	0	1.78638e+06	0	1.52626e+07	4.51016e+06	0	3.79644e+06	5.46517e+06	5.87195e+06	5.26685e+06	2.66187e+06	0	4.01689e+06	4.05314e+06	7.69802e+06	2.6291e+06	5.0172e+06	3.60108e+06	0	3.77397e+06	5.03064e+06	118160	1.00674e+07	3.73165e+06	0	8.55265e+06	3.72876e+06	0	7.2563e+06	0	9.11817e+06	5.78635e+06
A0A494BZW5	Zinc finger and BTB domain-containing protein 46	ZBTB46	ZBTB46	RTSPANSSGDSAIASCHDGGSSYGKEDQEPK	S176	1xCarbamidomethyl [C16]; 1xPhospho [S3]	0	0	0	0	1.81464e+06	2.60527e+06	0	3.31599e+06	2.08855e+06	0	0	0	0	0	0	0	0	0	1.94367e+06	0	0	0	0	0	0	0	0	1.21024e+06	0	0	1.8567e+06	0	0	0	0	0	0	0	0	0	0	0	0
Q8NCP5	Zinc finger and BTB domain-containing protein 44	ZBTB44	ZBTB44	SYIVMSPESPVK	S194	1xPhospho [S9]	0	2.17209e+06	1.04488e+06	1.29098e+06	2.50402e+06	2.50188e+06	2.28726e+06	2.37799e+06	1.9393e+06	0	1.60375e+06	0	3.6468e+06	0	3.43547e+06	0	1.19886e+06	1.39101e+06	0	2.09384e+06	2.67596e+06	1.841e+06	2.96804e+06	2.2891e+06	1.80562e+06	3.4794e+06	1.94509e+06	2.98382e+06	2.1654e+06	0	1.47109e+06	1.90539e+06	0	0	2.30518e+06	1.39922e+06	0	0	2.4207e+06	0	0	0	3.13966e+06
Q8NCP5	Zinc finger and BTB domain-containing protein 44	ZBTB44	ZBTB44	SYIVMSPESPVK	S194	1xPhospho [S9]; 1xOxidation [M5]	0	1.41462e+06	2.59561e+06	3.06867e+06	2.67893e+06	2.77436e+06	2.9073e+06	2.4153e+06	3.87701e+06	3.46521e+06	2.88521e+06	0	5.75473e+06	0	1.60663e+06	4.29143e+06	1.89867e+06	1.96408e+06	2.5089e+06	1.53495e+06	0	1.36066e+06	2.106e+06	1.89451e+06	0	2.45808e+06	1.64231e+06	1.55405e+06	2.14175e+06	1.77844e+06	1.94107e+06	1.80575e+06	0	0	2.05297e+06	0	767532	1.54999e+06	2.10437e+06	0	0	2.6739e+06	3.1713e+06
Q1RMZ5	ZBTB40 protein	ZBTB40	ZBTB40	AAKEDSQPGEQNDQGETGSLPGQQEK	S591	1xPhospho [S6]	1.38575e+06	1.95157e+06	3.15398e+06	0	3.10846e+06	0	2.48024e+06	0	0	0	2.13432e+06	0	1.53915e+06	0	0	0	0	0	0	1.91445e+06	5.33273e+06	0	0	1.69234e+06	0	2.75324e+06	1.2382e+06	0	1.61444e+06	1.40791e+06	0	2.55567e+06	0	2.32276e+06	0	0	0	0	0	0	4.33017e+06	0	0
Q9P1Z0	Zinc finger and BTB domain-containing protein 4	ZBTB4	ZBTB4	GAGALPFLPGVFGYAVNPQAAPPAPPTPPPPTLPPPIPPKGEGER	T983	1xPhospho [T27]	0	0	0	0	0	0	0	0	0	0	0	0	0	0	0	0	0	0	159709	0	0	0	0	109109	76528.8	0	80120	0	0	0	0	0	0	0	0	98533.1	0	161803	94271.4	0	0	0	0
Q8NAP3	Zinc finger and BTB domain-containing protein 38	ZBTB38	ZBTB38	TASLCLER	S200	1xCarbamidomethyl [C5]; 1xPhospho [S3]	0	2.35231e+06	6.7589e+06	1.38452e+06	1.51871e+06	2.64956e+06	2.07144e+06	2.64529e+06	0	0	3.81099e+06	2.94886e+06	1.59719e+06	3.94071e+06	1.88673e+06	0	3.08994e+06	1.0019e+06	1.32191e+06	1.3797e+06	345830	0	1.95697e+06	0	2.78935e+06	0	1.57063e+06	704174	0	1.40506e+06	409342	1.47225e+06	0	0	0	1.43623e+06	665914	0	1.91804e+06	1.48421e+06	7.06907e+06	6.50893e+06	2.45301e+06
Q86T24	Transcriptional regulator Kaiso	ZBTB33	ZBTB33	LPTPVNQATLSQTQGSEK	T251	1xPhospho [T3]	0	0	0	0	0	0	0	0	0	0	0	0	0	0	0	0	0	0	0	0	0	0	0	0	0	0	0	1.96243e+06	0	0	0	0	0	0	0	0	0	0	0	0	0	0	0
Q9ULJ3	Zinc finger and BTB domain-containing protein 21	ZBTB21	ZBTB21;DKFZp781N1974	EHAPLASPVENKEVYQCR	S714	1xCarbamidomethyl [C17]; 1xPhospho [S7]	0	0	0	2.19046e+06	2.42616e+06	2.02379e+06	2.0707e+06	0	0	5.64546e+06	3.43228e+06	0	0	0	6.59302e+06	0	0	0	0	2.30662e+06	1.33758e+06	0	1.88248e+06	0	2.29157e+06	2.54665e+06	2.27826e+06	1.44611e+06	1.65423e+06	3.93338e+06	0	0	0	2.17248e+06	0	0	646354	0	6.20877e+06	2.19474e+06	2.16764e+06	0	1.48596e+06
Q9ULJ3	Zinc finger and BTB domain-containing protein 21	ZBTB21	ZBTB21;DKFZp781N1974	EHAPLASPVENK	S714	1xPhospho [S7]	9.593e+06	1.30925e+07	1.62366e+07	1.86415e+07	1.83132e+07	1.74242e+07	1.41817e+07	1.12176e+07	6.39111e+06	1.37858e+07	1.99313e+07	1.29205e+07	1.5575e+07	9.89405e+06	1.4572e+07	1.28342e+07	1.10227e+07	7.69666e+06	1.07619e+07	1.18718e+07	1.87355e+07	0	1.71756e+07	1.44316e+07	1.73717e+07	2.13945e+07	1.22781e+07	1.76789e+07	1.39086e+07	2.29393e+07	1.50062e+07	7.99922e+06	1.2211e+07	8.33298e+06	7.92002e+06	1.10282e+07	1.34099e+07	2.34886e+07	9.97358e+06	1.15885e+07	1.03746e+07	2.28888e+07	1.4231e+07
Q9ULJ3	Zinc finger and BTB domain-containing protein 21	ZBTB21	ZBTB21;DKFZp781N1974	ESEVCPVPTNSPSPPPLPPPPPLPK	T979	1xCarbamidomethyl [C5]; 2xPhospho [T9; S13]	0	170801	473715	0	69552.3	0	62423.6	46548.6	0	0	0	0	0	0	131709	0	0	0	0	0	0	0	0	0	0	0	0	125580	0	0	0	0	0	215931	0	90456.3	0	0	0	0	0	0	95478.5
Q9ULJ3	Zinc finger and BTB domain-containing protein 21	ZBTB21	ZBTB21;DKFZp781N1974	ESEVCPVPTNSPSPPPLPPPPPLPK	S983	1xCarbamidomethyl [C5]; 2xPhospho [T9; S13]	0	170801	473715	0	69552.3	0	62423.6	46548.6	0	0	0	0	0	0	131709	0	0	0	0	0	0	0	0	0	0	0	0	125580	0	0	0	0	0	215931	0	90456.3	0	0	0	0	0	0	95478.5
Q9ULJ3	Zinc finger and BTB domain-containing protein 21	ZBTB21	ZBTB21;DKFZp781N1974	NPSPASSSHAVLDEK	S605	1xPhospho [S3]	6.8798e+06	1.05829e+06	1.16393e+06	1.30805e+06	8.3549e+06	1.08847e+06	3.83218e+06	2.72188e+06	3.91088e+06	4.02118e+06	1.97709e+06	7.19508e+06	9.45738e+06	3.60758e+06	7.02986e+06	4.10635e+06	5.55721e+06	4.10058e+06	5.94828e+06	9.41457e+06	5.50206e+06	0	2.79765e+06	2.75818e+06	6.33848e+06	4.14606e+06	1.57357e+06	12640396	7.2809e+06	3.87871e+06	1.6597e+06	1.64184e+06	0	3.57534e+06	6.77786e+06	6.53404e+06	1.04037e+07	7.93906e+06	2.46957e+06	1.11855e+07	9.85193e+06	7.28826e+06	1.03032e+07
Q9ULJ3	Zinc finger and BTB domain-containing protein 21	ZBTB21	ZBTB21;DKFZp781N1974	SFSASQSTDR	S411	1xPhospho [S3]	7.27809e+06	1.21983e+07	4.94116e+06	8.98163e+06	1.57704e+07	1.93518e+07	9.99934e+06	9.85832e+06	3.72082e+07	3.89836e+07	8.94216e+06	1.42244e+07	1.61217e+07	3.67558e+07	1.34968e+07	2.07728e+07	3.24116e+07	1.79078e+07	6.24449e+07	9.70921e+06	2.04689e+07	1.56662e+07	1.39026e+07	9.91051e+06	1.54278e+07	1.09736e+07	1.30878e+07	2.30539e+07	1.08559e+07	3.90353e+07	1.21398e+07	9.44135e+06	6.95779e+07	5.21109e+06	9.80874e+06	1.00604e+07	7.11239e+06	1.7972e+07	1.03977e+07	0	7.71034e+06	1.21252e+07	9.16378e+06
Q9ULJ3	Zinc finger and BTB domain-containing protein 21	ZBTB21	ZBTB21;DKFZp781N1974	SLSMDSQVPVYSPSIDLK	S345	1xPhospho [S3]; 1xOxidation [M4]	324969	0	334501	0	144152	169472	0	1.14413e+06	0	0	0	0	0	0	0	0	256450	0	272022	0	0	0	0	117085	0	0	151760	2.71884e+06	76076.7	0	144349	0	0	432773	147709	129902	0	0	119271	0	0	0	0
Q9ULJ3	Zinc finger and BTB domain-containing protein 21	ZBTB21	ZBTB21;DKFZp781N1974	SLSMDSQVPVYSPSIDLK	S345	1xPhospho [S3]	335209	482312	0	0	644136	0	0	79963.1	0	0	127909	0	47203.9	172912	182604	0	0	81849.4	228117	83958.6	270070	169649	68852.8	0	140646	48349.5	131473	272669	0	158693	0	0	0	0	0	0	0	351210	0	0	0	0	174076
Q9ULJ3	Zinc finger and BTB domain-containing protein 21	ZBTB21	ZBTB21;DKFZp781N1974	LRSFSASQSTDR	S409	2xPhospho [S3; S5]	1.77087e+06	0	3.39228e+06	0	883422	0	2.1345e+06	2560173	3.40404e+06	1.27459e+06	6.07182e+06	0	2.18642e+06	0	0	2.77778e+06	1.13912e+06	2.60918e+06	1.51643e+06	2.52356e+06	683255	0	0	680640	949465	2.79598e+06	1.83913e+06	2.42758e+06	2.19503e+06	0	3.32148e+06	1.19049e+06	0	0	0	2.87614e+06	1.96678e+06	1.81449e+06	1.30651e+06	0	0	0	2.9933e+06
Q9ULJ3	Zinc finger and BTB domain-containing protein 21	ZBTB21	ZBTB21;DKFZp781N1974	LRSFSASQSTDR	S411	2xPhospho [S3; S5]	1.77087e+06	0	3.39228e+06	0	883422	0	2.1345e+06	2560173	3.40404e+06	1.27459e+06	6.07182e+06	0	2.18642e+06	0	0	2.77778e+06	1.13912e+06	2.60918e+06	1.51643e+06	2.52356e+06	683255	0	0	680640	949465	2.79598e+06	1.83913e+06	2.42758e+06	2.19503e+06	0	3.32148e+06	1.19049e+06	0	0	0	2.87614e+06	1.96678e+06	1.81449e+06	1.30651e+06	0	0	0	2.9933e+06
Q9ULJ3	Zinc finger and BTB domain-containing protein 21	ZBTB21	ZBTB21;DKFZp781N1974	EGASPVTEVR	S422	1xPhospho [S4]	8.0716e+06	1.03143e+07	1.42545e+07	1.03067e+07	1.39494e+07	7.56539e+06	7.59633e+06	1.07414e+07	2.71927e+06	8.30083e+06	1.11947e+07	6.65608e+06	1.21726e+07	7.47134e+06	7.31636e+06	1.38591e+07	5.48e+06	4.61065e+06	4.37278e+06	1.39099e+07	11161602	0	1.1564e+07	1.29231e+07	7.0601e+06	1.13097e+07	7.78505e+06	1.21112e+07	7.32601e+06	6.43486e+06	6.83829e+06	9.19372e+06	0	8.11491e+06	6.53944e+06	9.17399e+06	1.40612e+07	1.00897e+07	2.89568e+06	2.50824e+06	6.92864e+06	1.19344e+07	1.21172e+07
Q99592	Zinc finger and BTB domain-containing protein 18	ZBTB18	ZBTB18;ZNF238	ELDREDKASDDEMMTPESER	S333	1xPhospho [S9]; 2xOxidation [M13; M14]	2.0347e+06	0	2.34572e+06	2.98482e+06	1.14382e+06	0	0	0	0	1.39385e+06	0	0	2.08467e+06	0	0	1.45841e+06	0	0	0	0	1.39644e+06	1.894e+06	0	3.83359e+06	1.76533e+06	0	2.63325e+06	1.01263e+06	0	0	1.34774e+06	0	0	0	0	871664	0	0	0	0	0	0	0
Q99592	Zinc finger and BTB domain-containing protein 18	ZBTB18	ZBTB18;ZNF238	TVASPCSSTESLSQR	S214	1xCarbamidomethyl [C6]; 1xPhospho [S4]	0	0	1.08819e+06	0	986723	910208	0	851258	0	0	1.16547e+06	0	0	0	1.08795e+06	0	0	0	0	1.04184e+06	4.36945e+06	0	0	749004	0	0	2.7361e+06	1.06303e+06	0	0	0	0	2.78313e+06	0	0	0	832469	0	0	0	0	4.46954e+06	949431
A0A024R3C6	Zinc finger and BTB domain containing 16 isoform 1	ZBTB16	PLZF;ZBTB16	TEMMQVDEVPSQDSPGAAESSISGGMGDKVEER	S256	1xPhospho [S14]	461767	2.86795e+06	0	0	0	0	0	0	0	0	0	0	0	0	0	0	0	0	0	1.70098e+06	0	0	1.62317e+06	0	0	0	0	0	0	360589	1.5285e+06	0	989363	0	0	0	0	0	2.83642e+06	0	0	0	1.16762e+06
O95625	Zinc finger and BTB domain-containing protein 11	ZBTB11	ZBTB11	SVNEGAYIR	S511	1xPhospho [S1]	0	0	3.82009e+06	0	0	0	719256	0	0	0	2.32478e+06	0	0	0	0	0	0	0	0	0	629780	0	0	0	0	0	1.52494e+06	0	0	0	0	0	0	0	711366	1.48578e+06	1.80817e+06	0	0	1.66058e+06	1.73236e+06	0	0
O95625	Zinc finger and BTB domain-containing protein 11	ZBTB11	ZBTB11	QRSVNEGAYIR	S511	1xPhospho [S3]	0	0	2.3159e+06	0	0	0	0	1.36665e+06	0	0	3.06652e+06	0	0	0	0	0	0	0	0	1.12291e+06	839563	0	0	0	0	0	0	0	0	0	0	0	1.08538e+07	0	0	0	802757	0	4.04464e+06	0	0	0	0
P86452	Zinc finger BED domain-containing protein 6	ZBED6	ZBED6	SESPIPVAEQGTLMR	S381	1xPhospho [S3]; 1xOxidation [M14]	6.07076e+06	3.46684e+06	1.04381e+07	1.12884e+07	2.12816e+07	2.04931e+07	1.71874e+07	5.43643e+06	5.26809e+06	0	8.0305e+06	2.58558e+07	1.95157e+07	447330	5.79927e+06	4.89906e+06	6.32723e+06	5.54836e+06	6.257e+06	1.02642e+07	1.30852e+07	2.97142e+06	4.65681e+06	9.29974e+06	4.97643e+06	6.41239e+06	7.03894e+06	4.28889e+06	9.15932e+06	7.3852e+06	7.28323e+06	5.23013e+06	0	4.93908e+07	8.34304e+06	0	5.32666e+06	6.57141e+06	1.35626e+07	8.84061e+06	0	1.0051e+07	7.48848e+06
P86452	Zinc finger BED domain-containing protein 6	ZBED6	ZBED6	DLGSGRPVADAPALLASNDPEQDEESLFESNIEK	S113	1xPhospho [S26]	1.16608e+06	0	612760	2.22179e+06	498376	0	0	672366	3.46508e+06	407548	0	203821	0	509603	801658	0	0	0	0	0	0	0	0	423143	0	568767	0	0	0	716383	778566	0	0	0	0	1.0286e+06	0	0	413202	0	0	0	0
O75132	Zinc finger BED domain-containing protein 4	ZBED4	ZBED4	EEALVGSSPHLPALHYDEPAENLAEK	S254	1xPhospho [S7]	0	1.43924e+06	0	1.21094e+06	78553.5	1.91469e+06	4.47358e+06	724226	0	0	0	0	0	0	0	269851	125205	0	192378	0	142803	132793	42739.6	0	161639	0	0	1.60556e+06	0	0	0	0	0	0	0	0	0	0	0	0	0	0	0
A0A6Q8PGH4	Zinc finger B-box domain-containing protein 1	ZBBX	ZBBX	SSSEVEITTMK	S228	1xPhospho [S3]	0	0	0	0	0	0	1.08343e+06	981781	0	0	2.80243e+06	0	0	0	520014	0	3.39575e+06	0	2.53102e+06	557294	1.2396e+06	0	1.33022e+06	1.78146e+06	636038	0	1.09375e+06	0	1.83763e+06	0	1.85303e+06	0	0	0	0	0	0	0	0	0	0	5.31084e+06	0
A0A6Q8PGH4	Zinc finger B-box domain-containing protein 1	ZBBX	ZBBX	SSSEVEITTMKR	S228	1xPhospho [S3]; 1xOxidation [M10]	1.956e+06	0	0	2.05374e+06	0	0	4.73019e+06	1.36195e+06	2.92613e+06	0	0	0	0	0	0	0	8.8365e+06	0	2.21678e+06	0	3.50545e+06	1.56689e+06	832672	0	0	0	0	0	0	0	0	0	0	0	0	1.96648e+06	0	0	0	0	0	0	0
A0A6Q8PGH4	Zinc finger B-box domain-containing protein 1	ZBBX	ZBBX	SSSEVEITTMK	S228	1xPhospho [S3]; 1xOxidation [M10]	9.74512e+06	1.19449e+07	1.63234e+07	1.19832e+07	1.91912e+07	1.25288e+07	1.14595e+07	8.37829e+06	7.73017e+06	9.74563e+06	1.63665e+07	6.07126e+06	1.87226e+07	9.40545e+06	13413186	1.53025e+07	6.12519e+06	8.66755e+06	8.39912e+06	1.25179e+07	1.30684e+07	5.81674e+06	1.72235e+07	1.29564e+07	7.84002e+06	1.73108e+07	1.32804e+07	2.20285e+07	7.89944e+06	7.86179e+06	1.49274e+07	1.08806e+07	0	1.1364e+07	8.74276e+06	9.59807e+06	4.46167e+06	1.33671e+07	7.18025e+06	2.07179e+07	2.70072e+07	3.12002e+07	2.20612e+07
P43403	Tyrosine-protein kinase ZAP-70	ZAP70	ZAP70	RIDTLNSDGYTPEPAR	T286	1xPhospho [T4]	2.4614e+06	0	0	0	739312	1.6877e+06	766525	1.56685e+06	2.11182e+06	0	0	1.47623e+06	0	3.05751e+06	2.06666e+06	0	0	0	0	0	0	0	0	0	0	0	0	2.29379e+06	0	0	0	0	0	0	0	0	2.20808e+06	0	0	0	0	0	0
A0A024R219	Zinc finger, A20 domain containing 2, isoform CRA_a	ZA20D2	ZFAND5;ZA20D2	MSPMGTASGSNSPTSDSASVQR	S48	1xPhospho [S2]	2.08801e+06	0	0	0	0	0	2.71849e+06	4.89497e+06	0	0	1.71877e+06	0	1.5751e+06	0	1.81811e+06	0	0	0	0	0	720106	0	0	1.17039e+06	0	2.0053e+06	0	5.20151e+06	4.00993e+06	0	0	2.86098e+06	0	2.09523e+06	1.816e+06	5.83075e+06	937733	1.78339e+06	1.57064e+06	0	0	0	769175
P25490	Transcriptional repressor protein YY1	YY1	YY1	KDIDHETVVEEQIIGENSPPDYSEYMTGK	S247	1xPhospho [S18]; 1xOxidation [M26]	4.75611e+06	5.50491e+06	1.33478e+07	1.18752e+06	9.86409e+06	7.33719e+06	896622	1.53618e+07	1.35784e+07	1.5638e+06	7.82246e+06	8.5167e+06	102162	808747	611984	0	0	0	267501	8.66486e+06	6.14011e+06	0	3.83158e+06	8.00971e+06	2.81429e+06	3.68713e+06	6.05288e+06	1.0951e+07	1.14864e+07	1.98267e+06	3.34836e+06	2.46402e+06	423396	519997	1.40825e+07	8.58366e+06	1.18857e+07	3.25648e+06	961654	0	0	0	780028
P25490	Transcriptional repressor protein YY1	YY1	YY1	KDIDHETVVEEQIIGENSPPDYSEYMTGK	S247	1xPhospho [S18]	4.7856e+06	9.55338e+06	1.14842e+07	4.60037e+06	1.39831e+06	9.4594e+06	1.11247e+07	1.42943e+07	4.33476e+06	1.7444e+06	1.01062e+07	547936	0	356768	2.09422e+06	207015	526808	182739	1.1999e+06	262677	516671	1.01506e+06	758998	853374	250953	266815	663873	3.99827e+07	1.52072e+07	982422	502525	705069	1.35403e+06	3.86503e+06	0	9.29649e+06	1.84259e+07	1.91352e+06	7.36314e+06	1.07023e+06	7.72478e+06	0	6.47338e+06
P25490	Transcriptional repressor protein YY1	YY1	YY1	DIDHETVVEEQIIGENSPPDYSEYMTGK	S247	1xPhospho [S17]; 1xOxidation [M25]	4.3815e+06	9.83228e+06	1.63718e+07	1.66109e+07	1.99751e+06	1.71427e+07	1.63907e+07	1.88217e+07	1.09884e+07	926241	1.50384e+07	535527	669769	0	7.30488e+06	1.49408e+06	588407	224001	1.15837e+06	1.00228e+06	540903	373842	845612	1.32768e+06	866401	503988	894156	2.86012e+07	9.48692e+06	387799	664743	978939	379307	2.36674e+06	2.12031e+07	6.79952e+06	1.83866e+07	2.78305e+06	9.02623e+06	2.81096e+06	1.21774e+07	0	1.26262e+07
P25490	Transcriptional repressor protein YY1	YY1	YY1	DIDHETVVEEQIIGENSPPDYSEYMTGK	S247	1xPhospho [S17]	7.987e+06	1.09364e+07	4.33579e+06	5.59936e+06	2.69136e+06	3.82428e+06	2.73218e+06	1.63447e+06	2.69047e+06	1.8584e+06	2.9906e+06	4.1184e+06	2.04306e+06	3.18536e+06	5.48268e+06	1.13151e+06	1.27063e+06	1.44055e+06	1.75977e+06	2.30535e+06	1.7889e+06	817615	4.23511e+06	4.19826e+06	2.90337e+06	1.71858e+06	2.6996e+06	6.89713e+07	2.76364e+06	4.01737e+06	2.26169e+06	1.33341e+06	4.23627e+06	1.40509e+06	4.46112e+06	3.19214e+06	5.92815e+06	6.66798e+06	7.52236e+06	5.2754e+06	4.05742e+06	5.17806e+06	2.22303e+06
P25490	Transcriptional repressor protein YY1	YY1	YY1	SYLSGGAGAAGGGGADPGNKK	S187	1xPhospho [S4]	0	1.0511e+06	0	1.8057e+06	0	0	1.89339e+06	1.55481e+06	0	0	0	0	0	0	1.60426e+06	0	0	0	2.42745e+06	1.60268e+06	1.31144e+06	0	2.33342e+06	799713	0	0	0	0	0	3.2903e+06	1.49514e+06	0	0	3.80667e+06	1.5194e+06	3.07907e+06	1.57065e+06	0	0	0	2.06026e+06	2.40404e+06	1.36168e+06
P25490	Transcriptional repressor protein YY1	YY1	YY1	KSYLSGGAGAAGGGGADPGNK	S187	1xPhospho [S5]	1.68881e+06	0	0	0	1.34674e+06	0	0	0	0	0	1.56138e+06	0	0	0	0	0	0	0	0	0	0	0	0	0	0	0	1.16251e+06	1.36155e+06	0	0	0	0	0	0	0	0	0	0	0	0	0	0	962933
P25490	Transcriptional repressor protein YY1	YY1	YY1	EEVVGGDDSDGLR	S118	1xPhospho [S9]	0	0	2.81317e+06	1.93576e+06	0	0	0	1.34863e+06	0	0	1.24232e+06	0	0	0	0	3.26782e+06	0	1.68058e+06	0	3.49349e+06	0	0	1.75657e+06	2.8154e+06	2.27765e+06	1.32574e+06	1.74244e+06	9.43784e+06	2.14046e+06	0	1.63583e+06	2.16012e+06	0	0	0	865485	4.63181e+06	1.85175e+06	0	1.92755e+06	0	0	1.08639e+06
D0PNI1	Epididymis luminal protein 4	YWHAZ	YWHAZ;14-3-3;HEL2;YWHAQ;SFN;YWHAB;YWHAH;YWHAE/FAM22A;YWHAE/FAM22B;YWHAG;YWHAE	FLIPNASQAESK	S110	1xPhospho [S7]	877237	0	0	0	578188	0	753874	0	886168	0	672769	0	0	0	0	0	0	0	0	0	0	0	0	0	775769	0	0	0	0	0	0	0	0	0	0	974838	645759	0	0	0	0	0	0
D0PNI1	Epididymis luminal protein 4	YWHAZ	YWHAZ;14-3-3;HEL2;YWHAQ;SFN;YWHAB;YWHAH;YWHAE/FAM22A;YWHAE/FAM22B;YWHAG;YWHAE	NLLSVAYK	S45	1xPhospho [S4]	0	6.59629e+06	0	8.12987e+06	0	1.74937e+07	1.31857e+07	4.85001e+06	1.4065e+07	0	6.04037e+06	0	0	0	4.89353e+06	0	0	0	0	0	0	0	0	0	0	0	0	937766	1.08633e+06	0	0	0	0	0	1.93021e+06	4.3872e+06	1.30287e+06	0	2.18453e+06	0	1.27242e+07	0	1.5543e+07
P27348	14-3-3 protein theta	YWHAQ	YWHAZ;14-3-3;HEL2;YWHAQ;SFN;YWHAB;YWHAH;YWHAE/FAM22A;YWHAE/FAM22B;YWHAG;YWHAE	TDTSDKKLQLIK	S72	1xPhospho [S4]	0	0	0	0	0	0	0	0	0	0	0	0	0	0	0	0	0	0	0	0	0	0	0	0	0	0	0	0	0	0	0	0	0	0	0	0	0	0	0	0	0	0	0
A0A024R1K7	Tyrosine 3-monooxygenase/tryptophan 5-monooxygenase activation protein, eta polypeptide, isoform CRA_b	YWHAH	YWHAZ;14-3-3;HEL2;YWHAQ;SFN;YWHAB;YWHAH;YWHAE/FAM22A;YWHAE/FAM22B;YWHAG;YWHAE	KNSVVEASEAAYK	S145	1xPhospho [S3]	0	0	0	0	775093	0	0	653927	0	0	0	0	0	0	0	0	0	0	0	0	0	0	0	0	0	0	0	633469	0	0	0	0	0	0	3.39866e+06	751050	812447	0	0	0	2.97997e+06	0	0
P31946	14-3-3 protein beta/alpha	YWHAB	YWHAZ;14-3-3;HEL2;YWHAQ;SFN;YWHAB;YWHAH;YWHAE/FAM22A;YWHAE/FAM22B;YWHAG;YWHAE	TAFDEAIAELDTLNEESYK	T207	1xPhospho [T12]	0	0	0	163087	0	0	51746.4	0	0	0	219940	0	0	0	445054	231598	222106	970879	0	0	0	265631	370301	0	192338	0	0	49235.2	69905.3	1.95414e+06	403959	0	1.24849e+06	771623	0	0	0	0	0	0	0	0	48546.2
Q9BYJ9	YTH domain-containing family protein 1	YTHDF1	YTHDF3;YTHDF2;DKFZp451J085;DKFZp451A052;YTHDF1	APGMNSLEQGMVGLK	S182	1xPhospho [S6]	0	0	0	0	0	0	445629	923818	0	0	0	0	0	0	0	0	0	0	0	0	0	0	0	0	0	0	0	1.68979e+06	0	0	0	0	0	0	0	1.90382e+06	691951	0	506983	0	0	0	0
Q9H6S0	3-5 RNA helicase YTHDC2	YTHDC2	YTHDC2	QPAPGGGGGGGPSPCGPGGGGR	S23	1xCarbamidomethyl [C15]; 1xPhospho [S13]	0	0	0	0	0	1.77587e+06	1.23161e+06	0	0	0	0	0	0	0	0	0	0	2.39662e+06	0	0	1.04267e+06	0	0	1.26777e+06	0	0	0	0	0	0	1.31808e+06	0	0	0	0	1.48291e+06	0	1.27152e+06	0	0	0	0	0
Q9H6S0	3-5 RNA helicase YTHDC2	YTHDC2	YTHDC2	VLMKSPSPALHPPQK	S1221	1xPhospho [S5]; 1xOxidation [M3]	0	580016	2.92201e+06	0	603185	754654	0	669118	0	0	1.63102e+06	0	0	0	0	0	803454	0	0	1.62495e+06	0	0	0	0	0	681010	1.19595e+06	2.31082e+06	1.87839e+06	0	849077	1.11991e+06	0	0	1.54391e+06	2.45145e+06	1.82876e+06	965760	1.50432e+06	0	0	0	901413
Q9H6S0	3-5 RNA helicase YTHDC2	YTHDC2	YTHDC2	GSKSPSPRPNMPVR	S1279	1xPhospho [S4]	0	2.38692e+06	2.37626e+06	0	1.12055e+06	961255	933580	0	0	0	0	0	0	0	0	1.62166e+06	0	1.84367e+06	1.43674e+06	3.15172e+06	1.30018e+06	2.27264e+06	0	0	1.81327e+06	1.78502e+06	2.38209e+06	6.29567e+06	5.98312e+06	0	0	1.7246e+06	0	3.3008e+06	4.68959e+06	5.09699e+06	2.12936e+06	0	3.67756e+06	4.70947e+06	0	0	2.86928e+06
Q9H6S0	3-5 RNA helicase YTHDC2	YTHDC2	YTHDC2	GSKSPSPRPNMPVR	S1279	2xPhospho [S4; S6]	3.48732e+06	0	0	1.96264e+06	2.78762e+06	0	4.57453e+06	3.21324e+06	0	0	7.2963e+06	1.61419e+06	0	2.40943e+06	0	1.04574e+06	2.28046e+06	2.00915e+06	1.61527e+06	4.32581e+06	1.12754e+06	0	2.17051e+06	2.34057e+06	2.94342e+06	2.47134e+06	2.88317e+06	4.72323e+06	3.9715e+06	2.25899e+06	3.31134e+06	4.18704e+06	0	1.35401e+06	3.04952e+06	4.85666e+06	4.88194e+06	3.81362e+06	0	3.40747e+06	4.88615e+06	0	5.31251e+06
Q9H6S0	3-5 RNA helicase YTHDC2	YTHDC2	YTHDC2	GSKSPSPRPNMPVR	S1281	2xPhospho [S4; S6]	3.48732e+06	0	0	1.96264e+06	2.78762e+06	0	4.57453e+06	3.21324e+06	0	0	7.2963e+06	1.61419e+06	0	2.40943e+06	0	1.04574e+06	2.28046e+06	2.00915e+06	1.61527e+06	4.32581e+06	1.12754e+06	0	2.17051e+06	2.34057e+06	2.94342e+06	2.47134e+06	2.88317e+06	4.72323e+06	3.9715e+06	2.25899e+06	3.31134e+06	4.18704e+06	0	1.35401e+06	3.04952e+06	4.85666e+06	4.88194e+06	3.81362e+06	0	3.40747e+06	4.88615e+06	0	5.31251e+06
Q9H6S0	3-5 RNA helicase YTHDC2	YTHDC2	YTHDC2	SPSPALHPPQK	S1223	1xPhospho [S3]	0	0	415186	0	759488	0	0	1.06025e+06	0	0	1.13283e+06	0	0	0	0	0	0	0	0	1.79354e+06	550935	0	1.05404e+06	1.46027e+06	0	1.43857e+06	0	2.20798e+06	909794	0	999259	1.7007e+06	0	2.05764e+06	0	2.02804e+06	0	0	0	0	0	0	0
J3QR07	YTH domain-containing protein 1	YTHDC1	YTHDC1	EEKDGELNVLDDILTEVPEQDDELYNPESEQDKNEK	S35	1xPhospho [S29]	0	0	0	0	0	362077	123807	0	0	202618	137627	106507	97990.4	0	0	0	0	0	177619	0	89173.5	0	0	0	0	239609	0	0	52280.4	0	505663	304697	0	0	0	525646	308226	0	592285	0	0	0	0
J3QR07	YTH domain-containing protein 1	YTHDC1	YTHDC1	SGSSASESYAGSEK	S317	1xPhospho [S3]	0	0	0	0	0	0	0	0	0	0	1.97943e+06	0	0	0	0	5.55736e+06	6.97826e+06	0	5.39839e+06	0	2.7265e+06	0	2.27229e+06	1.98562e+06	8.45692e+06	0	2.96964e+06	1.40519e+06	0	0	1.61696e+06	5.47325e+06	0	0	0	0	0	0	2.15189e+06	0	0	0	0
J3QR07	YTH domain-containing protein 1	YTHDC1	YTHDC1	GISPIVFDR	S308	1xPhospho [S3]	0	6.5673e+06	1.89803e+07	1.70507e+07	199362	236729	2.61402e+07	4.191e+07	0	0	0	0	0	374348	2.94021e+07	0	0	0	0	0	0	0	154721	0	0	0	0	7.26371e+07	5.13178e+07	0	0	0	0	0	4.80266e+07	2.77518e+07	5.00131e+07	0	2.63776e+07	0	0	0	2.55492e+07
Q86U90	YrdC domain-containing protein, mitochondrial	YRDC	YRDC	LFRPPSPAPAAPGAR	S37	1xPhospho [S6]	1.10809e+06	7.8285e+06	1.25714e+07	2.51428e+06	5.95838e+06	1.15044e+07	5.94089e+06	4.85213e+06	914501	2.93074e+06	3.89038e+06	0	1.7211e+06	0	6.37129e+06	5.92955e+06	1.22462e+06	1.58684e+06	1.88737e+06	1.46346e+06	1.15253e+07	1.24276e+07	6.43146e+06	9.18348e+06	0	1.91062e+06	7.503e+06	1.45172e+07	7.1068e+06	4.72401e+06	6.43545e+06	4.91212e+06	0	1.37829e+07	6.20165e+06	6.95596e+06	4.97373e+06	8.21015e+06	1.31362e+07	3.63376e+06	4.6402e+06	1.14386e+07	1.31775e+07
U3KQT9	YLP motif-containing protein 1 (Fragment)	YLPM1	YLPM1	KDAEEEESELEGSESLPAETALK	S67	1xPhospho [S8]	0	1.91393e+06	0	0	0	0	0	0	0	0	0	3.02615e+06	0	0	0	0	1.78313e+06	0	0	933723	0	0	0	1.56542e+06	0	2.73445e+06	0	4.95879e+06	701311	0	0	0	0	1.48814e+06	0	0	0	0	0	0	0	0	0
P49750	YLP motif-containing protein 1	YLPM1	YLPM1;FLJ00353	GPASQFYITPSTSLSPR	S827	1xPhospho [S13]	291139	0	0	0	284183	65595	0	1.68431e+06	0	0	0	0	0	0	0	107560	114416	66206	146400	0	100404	0	0	102574	54781.7	70912.8	0	1.70341e+06	0	107788	82531.5	0	0	303704	450981	0	0	0	1.79022e+06	0	0	0	0
P49750	YLP motif-containing protein 1	YLPM1	YLPM1;FLJ00353	SSYLESPR	S756	1xPhospho [S6]	6.8065e+06	1.25377e+07	1.34438e+07	1.40294e+07	1.00855e+07	2.99665e+07	8.47397e+06	1.29381e+07	9.39126e+06	2.122e+07	2.39659e+07	1.34199e+07	2.0142e+07	1.61159e+07	1.009e+07	6.36081e+06	8.8781e+06	1.4314e+07	1.10322e+07	1.02462e+07	1.00506e+07	2.58614e+06	1.55573e+07	7.6205e+06	7.23811e+06	3.5076e+07	1.92214e+07	1.41927e+07	7.20542e+06	1.85659e+07	2.43529e+07	9.93666e+06	1.24596e+07	1.46436e+07	1.63532e+07	2.09523e+07	1.73201e+07	1.61597e+07	9.18619e+06	1.50142e+07	1.41937e+07	9.51341e+06	6.56263e+06
P49750	YLP motif-containing protein 1	YLPM1	YLPM1;FLJ00353	SLDNEWDRDYGRPLDEQESQFR	S1303	1xPhospho [S1]	7.69655e+06	0	2.18008e+06	0	6.20012e+06	6.64237e+06	8.65449e+06	8.1682e+06	1.00315e+07	0	7.24316e+06	8.43949e+06	0	0	7.33339e+06	164986	44063.4	0	293109	0	0	0	0	0	1.13961e+06	2.68016e+06	3.14723e+06	1.08327e+06	3.33471e+06	3.87229e+06	1.69239e+06	0	0	163715	0	1.24412e+06	2.58681e+06	0	1.79061e+06	0	2.42914e+06	0	2.01943e+06
P49750	YLP motif-containing protein 1	YLPM1	YLPM1;FLJ00353	SLDNEWDR	S1303	1xPhospho [S1]	1.29207e+06	0	0	0	0	0	0	0	0	0	0	0	0	0	0	0	0	0	0	0	0	0	0	0	0	0	0	0	0	0	0	0	0	0	0	0	0	0	0	0	0	0	0
P49750	YLP motif-containing protein 1	YLPM1	YLPM1;FLJ00353	EKVPGGLQGSQDR	S1100	1xPhospho [S10]	4.93346e+06	3.4341e+06	1.91748e+06	4.8714e+06	5.21932e+06	3.91106e+06	5.85618e+06	4.37535e+06	0	5.11753e+06	5.15935e+06	0	0	0	4.00601e+06	5.04448e+06	3.6866e+06	3.52695e+06	6.01932e+06	3.04667e+06	3.6183e+06	2.24854e+06	3.91847e+06	1.6541e+06	2.49881e+06	4.2914e+06	3.43326e+06	2.67959e+06	2.25118e+06	4.1749e+06	3.89267e+06	0	0	0	0	0	1.08038e+06	4.65212e+06	3.39154e+06	0	0	0	1.91448e+06
P49750	YLP motif-containing protein 1	YLPM1	YLPM1;FLJ00353	GLGRSDFGR	S1160	1xPhospho [S5]	0	0	0	0	0	0	0	1.07569e+06	0	1.17587e+06	1.52981e+06	2.41559e+06	1.82539e+06	2.45703e+06	753184	975190	0	513663	0	0	555353	0	1.54119e+06	0	0	0	1.06966e+06	1.31941e+06	833374	0	0	0	0	0	0	0	0	0	953309	0	0	0	1.85379e+06
Q9BW85	Splicing factor YJU2	YJU2	YJU2	RLLEDSDSEDEAAPSPLQPALRPNPTAILDEAPKPK	S211	2xPhospho [S6; S8]	0	0	0	810787	0	0	190930	330602	0	2.67991e+06	313849	0	0	299430	0	0	0	0	2.43669e+06	0	479009	0	0	73719.8	0	0	734616	0	0	0	642755	292533	3.37934e+06	495234	0	0	0	235249	0	0	0	0	0
Q9BW85	Splicing factor YJU2	YJU2	YJU2	RLLEDSDSEDEAAPSPLQPALRPNPTAILDEAPKPK	S213	2xPhospho [S6; S8]	0	0	0	810787	0	0	190930	330602	0	2.67991e+06	313849	0	0	299430	0	0	0	0	2.43669e+06	0	479009	0	0	73719.8	0	0	734616	0	0	0	642755	292533	3.37934e+06	495234	0	0	0	235249	0	0	0	0	0
Q9BW85	Splicing factor YJU2	YJU2	YJU2	LLEDSDSEDEAAPSPLQPALRPNPTAILDEAPKPK	S211	2xPhospho [S5; S7]	493895	0	1.03985e+06	280622	1.12192e+06	587120	1.10499e+06	2.50705e+06	184641	776091	689297	192148	0	789341	264331	257558	589697	478140	657792	282861	214867	488303	398468	464158	419448	311480	338382	2.16953e+06	516193	0	621768	521119	0	150125	117868	390754	114352	422003	726460	0	0	0	0
Q9BW85	Splicing factor YJU2	YJU2	YJU2	LLEDSDSEDEAAPSPLQPALRPNPTAILDEAPKPK	S213	2xPhospho [S5; S7]	493895	0	1.03985e+06	280622	1.12192e+06	587120	1.10499e+06	2.50705e+06	184641	776091	689297	192148	0	789341	264331	257558	589697	478140	657792	282861	214867	488303	398468	464158	419448	311480	338382	2.16953e+06	516193	0	621768	521119	0	150125	117868	390754	114352	422003	726460	0	0	0	0
Q9Y548	Protein YIPF1	YIPF1	YIPF1	GSGREEDDELLGNDDSDKTELLAGQK	S47	1xPhospho [S2]	0	937264	0	0	0	2.16796e+06	1.21648e+06	0	0	0	0	0	0	0	802077	1.45152e+06	0	0	0	3.38426e+06	1.29739e+06	0	0	0	0	4.08877e+06	0	618127	0	1.73889e+06	5.03118e+06	0	0	2.16449e+06	1.38819e+06	1.49215e+06	0	0	0	0	4.08363e+06	0	2.99444e+06
J3QRU1	Tyrosine-protein kinase	YES1	SRC;FGR;FYN;LCK;YES1	DAWEIPRESLR	S281	1xPhospho [S9]	0	0	620791	434159	869358	0	1.38306e+06	1.35912e+06	0	0	603501	0	0	0	0	0	0	1.06225e+06	0	0	1.11994e+06	0	1.90251e+06	0	325433	1.5492e+06	1.38468e+06	3.38776e+06	1.41752e+06	0	3.08752e+06	1.3438e+06	0	0	421745	2.03503e+06	6.08249e+06	1.18793e+06	384549	0	0	0	910934
Q9ULM3	YEATS domain-containing protein 2	YEATS2	YEATS2	VKTEPETPGPSCLSQEGQTAVK	T1115	1xCarbamidomethyl [C12]; 1xPhospho [T7]	0	0	1.54067e+06	3.82017e+06	820004	0	560804	904232	6.3305e+06	0	1.84326e+06	2.74482e+06	0	0	667405	0	0	0	0	0	0	1.29401e+06	0	0	862013	2.18013e+06	0	0	0	0	0	0	0	0	0	965738	0	0	0	0	2.98619e+06	0	0
Q9ULM3	YEATS domain-containing protein 2	YEATS2	YEATS2	IVPQSQVPNPESPGK	S447	1xPhospho [S12]	3.32343e+06	0	5.3901e+06	1.2086e+06	3.52928e+06	5.24654e+06	3.85925e+06	4.52059e+06	3.4573e+06	4.64438e+06	4.62873e+06	5.56825e+06	1.0967e+07	3.5521e+06	5.24192e+06	2.97726e+06	3.69436e+06	2.49098e+06	3.70977e+06	3.74686e+06	6.77917e+06	0	3.16997e+06	7.24004e+06	6.68632e+06	3.34042e+06	5.96735e+06	1.54444e+07	8.42862e+06	4.42963e+06	3.726e+06	1.75664e+06	0	5.05489e+06	8.14639e+06	6.37257e+06	5.64105e+06	5.05666e+06	7.26649e+06	3.01668e+06	3.61612e+06	0	0
Q9ULM3	YEATS domain-containing protein 2	YEATS2	YEATS2	VQSPKPITGGLGAFTK	S575	1xPhospho [S3]	0	0	2.48564e+06	0	0	0	906024	0	0	0	0	0	0	0	0	0	0	0	0	0	2.80913e+06	0	0	0	0	0	0	0	0	1.1861e+06	0	0	0	0	0	408254	0	0	1.95955e+06	0	0	0	0
P16989	Y-box-binding protein 3	YBX3	CSDA;YBX1;YBX3	SPVGSGAPQAAAPAPAAHVAGNPGGDAAPAATGTAAAASLATAAGSEDAEKK	S34	1xPhospho [S1]	778457	0	4.18306e+06	0	0	3.52193e+06	4.59568e+06	1.08374e+07	0	547171	2.16993e+06	0	0	0	816025	63894.9	371840	3.05254e+06	858914	0	0	0	0	0	0	5.85809e+06	1.4457e+06	0	0	0	0	0	0	0	0	0	0	0	0	0	0	0	1.2776e+06
P16989	Y-box-binding protein 3	YBX3	CSDA;YBX1;YBX3	NDTKEDVFVHQTAIK	T112	1xPhospho [T3]	1.09183e+07	2.13332e+06	3.0478e+06	0	1.04256e+06	0	1.81051e+06	3.32001e+06	1.52546e+06	0	1.65814e+06	0	0	0	1.96258e+06	0	1.68606e+06	2.16973e+06	0	779197	0	0	0	0	0	1.82814e+06	3.8133e+06	0	0	1.75561e+06	1.13212e+06	1.10117e+06	0	0	1.37036e+06	3.16296e+06	1.86607e+06	2.03425e+06	2.18397e+06	2.05871e+06	0	0	3.16612e+06
P16989	Y-box-binding protein 3	YBX3	CSDA;YBX1;YBX3	SVGDGETVEFDVVEGEK	S134	1xPhospho [S1]	417546	1.12138e+07	1.90752e+07	7.3119e+06	0	1.65418e+07	9.76138e+06	1.20816e+07	6.612e+06	245714	7.37988e+06	0	461544	210239	8.00302e+06	0	174808	27547.4	0	0	0	0	0	0	0	0	0	8.19205e+06	1.09072e+07	247928	0	0	0	452834	0	2.79362e+07	2.05682e+07	0	7.63096e+06	3.07131e+06	9.27598e+06	0	6.96442e+06
P16989	Y-box-binding protein 3	YBX3	CSDA;YBX1;YBX3	RPRPPNAPSQDGK	S346	1xPhospho [S9]	0	39843.4	0	5.11771e+06	77301.8	0	1.22308e+06	0	0	2.13631e+06	1.24208e+06	0	0	0	4.64232e+06	1.15245e+06	3.6017e+06	3.12652e+06	0	2.4253e+06	0	2.40395e+06	2.29506e+06	1.31449e+06	53267.1	2.64097e+06	0	102915	2.85305e+06	1.71416e+06	5.72457e+06	5.73218e+06	0	0	0	85261.5	1.23229e+07	8.77916e+06	2.77764e+06	0	0	0	0
P67809	Y-box-binding protein 1	YBX1	CSDA;YBX1;YBX3;YB-1	NYQQNYQNSESGEKNEGSESAPEGQAQQR	S167	2xPhospho [S11; S18]	0	0	0	0	0	0	0	2.96275e+06	0	0	0	0	0	0	0	0	0	0	0	0	0	0	0	0	0	0	0	4.36188e+06	0	0	0	0	0	0	0	0	0	0	0	0	0	0	0
P67809	Y-box-binding protein 1	YBX1	CSDA;YBX1;YBX3;YB-1	NYQQNYQNSESGEKNEGSESAPEGQAQQR	S174	2xPhospho [S11; S18]	0	0	0	0	0	0	0	2.96275e+06	0	0	0	0	0	0	0	0	0	0	0	0	0	0	0	0	0	0	0	4.36188e+06	0	0	0	0	0	0	0	0	0	0	0	0	0	0	0
P67809	Y-box-binding protein 1	YBX1	CSDA;YBX1;YBX3;YB-1	GAEAANVTGPGGVPVQGSK	S136	1xPhospho [S18]	0	0	0	1.82826e+06	3.49375e+06	0	0	1.85115e+06	2.93603e+06	1.04874e+07	0	4.9326e+06	0	5.7098e+06	2.75845e+06	5.49422e+06	4.0326e+06	0	0	2.52951e+06	4.3938e+06	0	4.80451e+06	0	1.56023e+07	0	0	1.78642e+06	5.99643e+06	0	0	0	0	0	0	2.18221e+06	0	0	4.51785e+06	0	0	0	0
P67809	Y-box-binding protein 1	YBX1	CSDA;YBX1;YBX3;YB-1	EDGNEEDKENQGDETQGQQPPQR	T271	1xPhospho [T15]	0	0	4.18707e+06	2.8713e+06	0	0	0	0	0	3.70851e+06	0	0	0	0	0	0	1.02979e+07	0	0	1.37692e+06	0	0	0	0	0	0	0	4.13781e+06	0	0	0	0	0	0	0	0	2.4905e+06	2.12918e+06	0	0	0	0	0
P67809	Y-box-binding protein 1	YBX1	CSDA;YBX1;YBX3;YB-1	GAEAANVTGPGGVPVQGSKYAADR	S136	1xPhospho [S18]	0	3.01899e+06	724945	0	0	2.18064e+06	0	0	0	0	0	0	0	0	6.14209e+06	0	0	0	0	0	0	2.20657e+07	0	0	0	0	0	0	0	0	0	0	0	0	0	0	0	0	2.20106e+07	0	0	0	0
A0A0S2Z4R1	Tyrosine--tRNA ligase (Fragment)	YARS	YARS1;YARS	MSSSEEESKIDLLDRK	S224	1xPhospho [S2]; 1xOxidation [M1]	0	506894	0	0	0	560040	0	1.07458e+06	0	0	0	0	0	0	0	0	0	0	0	762954	0	0	505075	0	0	0	0	1.25447e+06	1.42881e+06	0	0	658667	0	0	3.04759e+06	1.66778e+06	0	1.23037e+06	0	0	1.49909e+06	0	0
A0A0S2Z4R1	Tyrosine--tRNA ligase (Fragment)	YARS	YARS1;YARS	MSSSEEESKIDLLDR	S225	1xPhospho [S3]	0	875394	1.50697e+06	1.06314e+06	0	0	1.35402e+06	1.69506e+06	0	0	1.52382e+06	0	0	0	736868	1.05542e+06	0	0	0	2.06283e+06	1.34738e+06	0	0	0	0	0	929323	0	1.99127e+06	0	1.18794e+06	1.76962e+06	0	0	0	0	2.63817e+06	1.00022e+06	0	0	0	0	890858
A0A0S2Z4R1	Tyrosine--tRNA ligase (Fragment)	YARS	YARS1;YARS	MSSSEEESKIDLLDRK	S224	1xPhospho [S2]	1.90471e+06	1.14944e+06	631731	999677	0	2.1499e+06	893028	656743	2.90328e+06	0	1.28454e+06	2.76411e+06	0	0	2.49136e+06	0	4.10763e+06	1.87851e+06	4.67724e+06	553209	848070	5.89197e+06	0	1.90842e+06	0	1.80685e+06	705454	0	1.25051e+06	2.0948e+06	1.90664e+06	1.0816e+06	0	2.69265e+06	2.34965e+06	2.5032e+06	568475	0	0	0	1.5053e+06	0	472286
P46937	Transcriptional coactivator YAP1	YAP1	DKFZp451O0517;YAP1	TPDDFLNSVDEMDTGDTINQSTLPSQQNR	S419	1xPhospho [S8]; 1xOxidation [M12]	208221	0	3.99387e+06	0	0	0	0	0	0	0	0	0	0	0	0	103187	0	0	0	0	0	0	0	0	0	0	0	0	0	0	0	0	0	0	0	1.54836e+06	0	130888	0	0	0	0	0
P46937	Transcriptional coactivator YAP1	YAP1	DKFZp451O0517;YAP1	AHSSPASLQLGAVSPGTLTPTGVVSGPAATPTAQHLR	S138	3xPhospho [T/S]	144696	0	1.05345e+06	100446	352393	0	51245.4	312093	0	0	396981	0	0	0	0	0	0	224599	225427	142836	110703	0	0	0	0	0	0	0	0	0	206294	186925	0	384691	0	45321.2	0	97883.6	0	0	0	0	38944.7
P46937	Transcriptional coactivator YAP1	YAP1	DKFZp451O0517;YAP1	AHSSPASLQLGAVSPGTLTPTGVVSGPAATPTAQHLR	S149	3xPhospho [T/S]	144696	0	1.05345e+06	100446	352393	0	51245.4	312093	0	0	396981	0	0	0	0	0	0	224599	225427	142836	110703	0	0	0	0	0	0	0	0	0	206294	186925	0	384691	0	45321.2	0	97883.6	0	0	0	0	38944.7
P46937	Transcriptional coactivator YAP1	YAP1	DKFZp451O0517;YAP1	SHSRQASTDAGTAGALTPQHVR	S109	2xPhospho [S7; T/S]	0	0	0	0	0	0	0	0	0	0	0	0	0	3.04219e+06	0	1.20097e+06	0	0	0	0	0	0	1.47609e+06	0	0	0	0	0	1.48038e+06	0	0	0	0	2.04122e+07	9.82251e+06	988494	0	0	6.36367e+06	6.52307e+06	0	0	0
P46937	Transcriptional coactivator YAP1	YAP1	DKFZp451O0517;YAP1	KLPDSFFKPPEPK	S94	1xPhospho [S5]	0	0	2.60391e+06	0	0	0	0	0	0	0	0	0	0	0	0	135227	0	0	0	0	0	0	0	0	0	0	0	0	0	0	0	0	0	0	0	716017	727805	0	0	0	0	0	797830
P46937	Transcriptional coactivator YAP1	YAP1	DKFZp451O0517;YAP1	ISQSAPVK	S274	1xPhospho [S2]	2.9118e+06	0	2.3918e+06	1.07524e+06	0	625958	1.11886e+06	1.09229e+06	0	0	2.12042e+06	0	0	0	0	1.72808e+06	0	791012	0	1.08325e+06	1.71931e+06	0	1.12175e+06	0	798216	800872	0	1.33233e+06	0	0	0	854145	7.34764e+06	1.05493e+06	660319	1.37623e+06	1.68536e+06	649135	696784	0	0	0	1.82446e+06
H7C5E4	5-3 exoribonuclease 1 (Fragment)	XRN1	XRN1	EAQSSQATPVQTSQPDSSNIVKVSPR	S1099	1xPhospho [S24]	0	0	0	0	0	0	0	0	0	0	0	0	0	0	0	0	0	0	0	0	0	0	0	0	0	0	0	2.69893e+06	1.39679e+06	0	0	0	0	0	0	0	2.0477e+06	0	0	0	0	0	0
H7C5E4	5-3 exoribonuclease 1 (Fragment)	XRN1	XRN1	ENEVQSSHHGEPPSEEHLSPQSFAMK	S814	1xPhospho [S19]	1.36698e+06	2.99018e+06	0	0	1.15981e+06	6.58415e+06	1.52495e+06	2.3855e+06	3.56123e+06	3.89618e+06	5.55952e+06	3.15718e+06	2.49669e+06	0	3.79331e+06	0	0	2.03044e+06	0	3.64495e+06	1.0992e+06	0	0	1.36176e+06	0	7.1845e+06	1.52262e+06	3.86821e+06	2.92742e+06	0	4.82876e+06	4.53757e+06	1.48407e+06	1.36633e+06	0	9.59623e+06	5.61746e+06	2.93763e+06	4.08827e+06	0	0	0	5.89539e+06
P13010	X-ray repair cross-complementing protein 5	XRCC5	XRCC5	TEQGGAHFSVSSLAEGSVTSVGSVNPAENFR	S577	2xPhospho [S9; S11]	0	0	1.13166e+06	0	0	0	137445	0	165731	434303	0	0	0	0	0	91426.1	410370	0	0	0	146866	0	603103	0	0	0	234954	0	159373	0	0	0	0	0	0	169715	0	426410	0	0	193652	0	0
P13010	X-ray repair cross-complementing protein 5	XRCC5	XRCC5	TEQGGAHFSVSSLAEGSVTSVGSVNPAENFR	S579	2xPhospho [S9; S11]	0	0	1.13166e+06	0	0	0	137445	0	165731	434303	0	0	0	0	0	91426.1	410370	0	0	0	146866	0	603103	0	0	0	234954	0	159373	0	0	0	0	0	0	169715	0	426410	0	0	193652	0	0
A0A024RAL0	X-ray repair complementing defective repair in Chinese hamster cells 4, isoform CRA_c	XRCC4	XRCC4	EHISAENMSLETLRNSSPEDLFDEI	S326	2xPhospho [S17; S/T]; 1xOxidation [M8]	0	0	126089	0	94711.1	0	63411.6	74915.7	0	0	0	0	0	0	0	0	0	0	0	0	0	0	0	0	182526	0	0	0	0	0	0	0	0	0	52034.4	82284.6	0	0	0	0	0	0	0
A0A024RAL0	X-ray repair complementing defective repair in Chinese hamster cells 4, isoform CRA_c	XRCC4	XRCC4	EHISAENMSLETLR	S318	1xPhospho [S9]	0	0	0	0	0	0	0	2.06824e+06	0	0	0	0	0	0	0	1.27142e+06	0	0	0	0	0	0	1.66328e+06	1.85247e+06	2.34783e+06	1.2979e+06	0	1.22222e+06	0	0	0	0	0	0	0	0	0	0	0	0	0	0	1.3502e+06
A0A024R0S8	X-ray repair complementing defective repair in Chinese hamster cells 1, isoform CRA_b	XRCC1	XRCC1	AASPVLQEDIDIEGVQSEGQDNGAEDSGDTEDELRR	S461	1xPhospho [S3]	1.20923e+06	4.30693e+06	0	783917	341675	2.59563e+06	0	2.10293e+06	0	697226	3.61821e+06	0	0	378427	1.2496e+06	1.10456e+06	636741	112023	430726	621322	296275	2.9374e+06	627195	181491	351021	1.29172e+06	484855	8.57324e+06	0	624715	1.17883e+06	675919	0	463249	825157	0	3.69939e+06	1.21106e+06	0	3.80358e+06	3.71142e+06	0	0
A0A024R0S8	X-ray repair complementing defective repair in Chinese hamster cells 1, isoform CRA_b	XRCC1	XRCC1	TKPTQAAGPSSPQKPPTPEETK	T440	2xPhospho [T4; T17]	1.23844e+08	1.26139e+08	1.47188e+08	1.91002e+08	1.96086e+08	129102385	1.55558e+08	1.83618e+08	1.35428e+08	1.45925e+08	2.29243e+08	9.54005e+07	2.46576e+08	1.43993e+08	7.54071e+07	2.48599e+08	1.98153e+08	1.64964e+08	1.79349e+08	2.22089e+08	1.84799e+08	2.46823e+08	2.67036e+08	290081147	2.18382e+08	2.49756e+08	2.49995e+08	3.534e+08	1.93095e+08	183463610	2.61981e+08	2.86152e+08	1.49216e+08	1.2969e+08	2.33162e+08	1.21168e+08	2.70528e+08	2.21587e+08	1.20333e+08	1.9556e+08	3.10854e+08	1.66151e+08	3.08209e+08
A0A024R0S8	X-ray repair complementing defective repair in Chinese hamster cells 1, isoform CRA_b	XRCC1	XRCC1	TKPTQAAGPSSPQKPPTPEETK	T453	2xPhospho [T4; T17]	1.23844e+08	1.26139e+08	1.47188e+08	1.91002e+08	1.96086e+08	129102385	1.55558e+08	1.83618e+08	1.35428e+08	1.45925e+08	2.29243e+08	9.54005e+07	2.46576e+08	1.43993e+08	7.54071e+07	2.48599e+08	1.98153e+08	1.64964e+08	1.79349e+08	2.22089e+08	1.84799e+08	2.46823e+08	2.67036e+08	290081147	2.18382e+08	2.49756e+08	2.49995e+08	3.534e+08	1.93095e+08	183463610	2.61981e+08	2.86152e+08	1.49216e+08	1.2969e+08	2.33162e+08	1.21168e+08	2.70528e+08	2.21587e+08	1.20333e+08	1.9556e+08	3.10854e+08	1.66151e+08	3.08209e+08
A0A024R0S8	X-ray repair complementing defective repair in Chinese hamster cells 1, isoform CRA_b	XRCC1	XRCC1	AIGSTSKPQESPK	S241	1xPhospho [S11]	0	0	0	0	0	0	0	0	0	0	0	0	0	0	0	0	0	0	0	0	1.08361e+06	0	0	1.0833e+06	0	0	0	2.49797e+06	0	0	0	0	0	0	0	735501	0	0	0	0	0	0	0
A0A024R0S8	X-ray repair complementing defective repair in Chinese hamster cells 1, isoform CRA_b	XRCC1	XRCC1	TPSKPPAQLSPSVPK	S266	1xPhospho [S10]	0	0	0	0	0	2.32021e+06	0	0	0	0	0	0	0	0	0	0	0	0	0	0	0	0	0	0	0	0	0	3.93795e+06	1.51221e+06	0	0	0	0	0	0	0	0	0	0	0	0	0	0
Q9UBH6	Xenotropic and polytropic retrovirus receptor 1	XPR1	XPR1	ESTGVTTLR	T106	1xPhospho [T7]	2.39198e+06	1.32622e+06	3.42937e+06	2.45949e+06	964742	0	1.50289e+06	3.30031e+06	0	0	1.1438e+06	0	0	0	436324	2.8939e+06	1.31545e+06	0	0	979886	598995	1.61325e+06	607628	1.44793e+06	1.22905e+06	869575	2.0658e+06	956107	0	0	2.62331e+06	4.31841e+06	0	2.04705e+06	0	1.2585e+06	0	2.62437e+06	0	0	0	4.88586e+06	0
Q9UBH6	Xenotropic and polytropic retrovirus receptor 1	XPR1	XPR1	ARDTKVLIEDTDDEANT	T683	1xPhospho [T4]	4.33411e+06	7.95896e+06	3.97403e+06	3.18603e+06	4.95235e+06	6.02655e+06	6.55193e+06	6.37843e+06	5.67219e+06	6.11487e+06	4.7597e+06	2.60634e+06	3.1948e+06	4.59572e+06	5.88389e+06	2.96949e+06	2.23389e+06	3.63545e+06	3.80959e+06	3.9898e+06	2.78289e+06	4.13485e+06	4.23528e+06	3.04142e+06	4.07982e+06	3.53338e+06	2.20063e+06	1.80336e+06	2.54308e+06	2.33275e+06	3.12165e+06	0	0	0	3.35563e+06	3.80298e+06	2.52433e+06	5.12547e+06	7.39326e+06	1.14032e+07	2.89905e+06	7.97004e+06	3.09059e+06
D9I4E1	Xeroderma pigmentosum complementation group C	XPC	XPC	SEAAAPHTDAGGGLSSDEEEGTSSQAEAAR	S883	2xPhospho [S]	2.33672e+07	1.3183e+07	3.17822e+07	2.52462e+07	2.74245e+07	1.69248e+06	4.96626e+07	2.00008e+07	3.35266e+06	7.29872e+06	2.40881e+07	0	6.22838e+06	0	2.29351e+07	3.83641e+07	1.47637e+07	2.07922e+07	3.41571e+06	2.30816e+07	2.64975e+06	9.31015e+06	1.01116e+07	8.57539e+06	2.85249e+07	9.04341e+06	1.3648e+07	4.42028e+07	6.99712e+06	0	2.54216e+07	2.1453e+07	1.90533e+07	1.31997e+07	1.02079e+07	1.21038e+07	3.52582e+07	1.3283e+07	1.0003e+07	3.15644e+07	2.64858e+06	1.48991e+07	9.34291e+06
D9I4E1	Xeroderma pigmentosum complementation group C	XPC	XPC	VIKDEALSDGDDLR	S94	1xPhospho [S8]	2.03136e+07	2.243e+07	3.81069e+07	3.07965e+07	1.91557e+07	3.81461e+06	2.60131e+07	1.8694e+07	6.12421e+06	9.5009e+06	2.53978e+07	1.01086e+07	2.34593e+07	6.34818e+06	1.51094e+07	3.29199e+07	1.90818e+07	2.19406e+07	1.49897e+07	2.45576e+07	1.26534e+07	1.24842e+07	1.2904e+07	1.43136e+07	2.29859e+07	7.79768e+06	1.21284e+07	2.32927e+07	1.66379e+07	1.12169e+07	1.22036e+07	1.4621e+07	0	1.5862e+07	2.46679e+07	9.98142e+06	3.13447e+07	15362200	7.07728e+06	1.78647e+07	7.75913e+06	1.81864e+07	5.60229e+06
D9I4E1	Xeroderma pigmentosum complementation group C	XPC	XPC	ILAASWPQNREDEEK	S903	1xPhospho [S5]	5.19352e+06	4.70352e+06	1.15096e+06	5.18808e+06	9.59091e+06	1.21108e+07	1.31571e+07	5.09015e+06	1.00563e+07	2.10389e+07	1.25364e+07	1.3175e+07	5.2933e+06	0	1.17382e+07	4.04778e+06	1.02565e+07	4.27803e+06	1.0406e+07	1.77791e+06	3.41954e+06	3.00477e+06	0	1.92671e+06	5.40945e+06	1.51481e+06	2.89657e+06	2.33768e+06	1.38712e+06	9.10224e+06	0	1.87425e+06	0	1.49384e+06	3.60323e+06	1.66456e+06	2.11025e+06	3.10228e+06	4.0289e+06	0	0	0	0
D9I4E1	Xeroderma pigmentosum complementation group C	XPC	XPC	ILAASWPQNREDEEKQK	S903	1xPhospho [S5]	0	0	0	0	1.88659e+06	0	1.88639e+06	0	0	0	2.19652e+06	5.52085e+06	0	0	6.88956e+06	0	0	0	0	0	1.1431e+06	0	0	0	1.88291e+06	0	0	0	861320	2.14438e+06	0	0	0	0	0	0	0	0	5.25228e+06	0	0	0	0
D9I4E1	Xeroderma pigmentosum complementation group C	XPC	XPC	DEALSDGDDLRDFPSDLKK	S94	1xPhospho [S5]	1.23063e+06	1.78614e+06	1.0099e+06	2.16708e+06	2.51102e+06	0	3.7189e+06	1.49231e+06	1.67787e+06	0	2.26831e+06	0	0	0	2.58815e+06	0	0	1.54171e+06	0	1.28814e+06	1.29265e+06	0	1.84932e+06	0	2.61849e+06	570740	855610	2.00441e+06	1.67311e+06	4.38119e+06	3.25021e+06	1.62579e+06	0	0	1.51709e+06	0	2.46913e+06	0	1.0464e+06	3.92514e+06	0	0	1.23831e+06
P23025	DNA repair protein complementing XP-A cells	XPA	XPA	SLEVWGSQEALEEAK	S196	1xPhospho [S7]	172007	0	0	0	0	0	0	0	0	0	0	0	0	0	1.69373e+06	0	0	0	0	0	0	0	0	69528.3	0	0	0	0	0	0	0	57327	0	0	0	0	0	0	1.50232e+06	0	0	0	0
Q5GH76	XK-related protein 4	XKR4	XKR4	TVVGGGSAAGEGEARPSTPQR	T211	1xPhospho [T18]	0	0	0	0	0	0	0	0	0	0	1.02955e+06	0	3.22086e+06	0	0	0	0	0	0	0	0	0	0	0	1.58565e+06	0	1.71393e+06	0	0	0	0	1.62195e+06	0	0	0	4.53011e+06	0	0	0	0	0	0	0
Q702N8	Xin actin-binding repeat-containing protein 1	XIRP1	XIRP1	GISLEEGARPDVSATR	S295	1xPhospho [S3]	4.63239e+07	172155614	4.07478e+07	3.48699e+07	8.59733e+07	3.5938e+07	9.12921e+07	2.78603e+08	7.72047e+07	9.60535e+07	5.76884e+07	5.19867e+07	2.48714e+08	0	9.00647e+07	1.2881e+08	1.34617e+08	1.74231e+08	1.14167e+08	1.39918e+08	2.31405e+08	2.7309e+08	1.56392e+08	2.82331e+08	8.57935e+07	1.08506e+08	1.25922e+08	6.78863e+07	1.27246e+08	1.22415e+08	6.98009e+07	155432503	1.94907e+06	2.87143e+07	2.50815e+07	1.63232e+08	2.53397e+08	8.79567e+07	1.10264e+08	1.14909e+08	2.83115e+08	2.60348e+08	1.44462e+08
Q702N8	Xin actin-binding repeat-containing protein 1	XIRP1	XIRP1	KFEEGSFANSTDQEPTRPQPGGGDVR	S138	1xPhospho [S10]	0	0	0	0	0	0	0	3.04922e+06	0	0	0	0	0	0	0	0	0	0	0	0	0	0	0	0	0	0	0	0	0	0	0	0	0	0	0	0	0	0	0	0	0	0	0
Q702N8	Xin actin-binding repeat-containing protein 1	XIRP1	XIRP1	SPSTIDVVR	S529	1xPhospho [S3]	5.50635e+06	8.51682e+06	2.48646e+06	3.37769e+06	0	0	2.63613e+06	6.87084e+06	5.82902e+06	0	1.73705e+06	3.4823e+06	2.44561e+06	7.69024e+06	3.13283e+06	3.6229e+06	2.68006e+06	5.78918e+06	7.19923e+06	2.48044e+06	1.08731e+07	3.00107e+06	5.58167e+06	5.80108e+06	0	1.25933e+07	2.91364e+06	1.20381e+06	0	6.42509e+06	4.53375e+06	0	0	1.1898e+06	0	4.1321e+06	2.24591e+06	1.01618e+07	1.60198e+06	0	5.50095e+06	0	4.58542e+06
Q702N8	Xin actin-binding repeat-containing protein 1	XIRP1	XIRP1	KVSREEQALPR	S1121	1xPhospho [S3]	0	0	0	0	0	0	440611	1.40479e+07	0	0	681668	0	0	0	3.42097e+06	0	0	1.47031e+06	0	0	1.73888e+06	0	8.58413e+06	0	0	3.82952e+06	1.89046e+06	0	468050	0	1.34121e+06	7.15225e+06	0	2.46958e+06	3.78991e+06	4.66345e+06	6.09171e+06	1.46065e+06	599110	0	5.8784e+06	0	7.37247e+06
P98170	E3 ubiquitin-protein ligase XIAP	XIAP	XIAP	DSMQDESSQTSLQK	S430	1xPhospho [S11]; 1xOxidation [M3]	1.04247e+07	5.32635e+06	9.89887e+06	1.45037e+07	3.56235e+06	1.21692e+07	9.33214e+06	2.91481e+06	9.01467e+06	1.42223e+07	8.1101e+06	0	1.14804e+07	1.0352e+07	7.69123e+06	9.6952e+06	4.79114e+06	8.05456e+06	9.26328e+06	1.20458e+07	5.82704e+06	4.12049e+07	1.54883e+07	9.32827e+06	2.58407e+06	5.33078e+06	9.91453e+06	0	4.82601e+06	4.96288e+06	4.01771e+06	0	0	1.97399e+07	0	2.16651e+06	0	0	1.34513e+07	0	3.8781e+06	0	0
P98170	E3 ubiquitin-protein ligase XIAP	XIAP	XIAP	NPSMADYEAR	S261	1xPhospho [S3]; 1xOxidation [M4]	0	0	789597	0	1.04831e+06	0	0	0	0	0	0	0	0	0	0	0	0	1.22534e+06	0	788306	711506	2.42122e+06	0	665643	0	0	0	0	530851	0	879123	0	0	0	1.29856e+06	935400	0	0	0	0	0	0	0
Q96GT9	X antigen family member 2	XAGE2	XAGE2	RSLQPPELIGAMLEPTDEEPKEEKPPTK	S16	1xPhospho [S2]	0	119990	0	0	0	0	0	878480	351229	0	0	0	473954	0	2.66281e+06	0	0	640757	0	373382	108743	0	73972.9	731115	0	0	0	0	0	0	399407	0	0	0	0	0	0	527368	96945.4	1.26424e+06	0	3.21155e+06	0
Q9HD64	X antigen family member 1	XAGE1A	XAGE1A	VGILHLGSR	S20	1xPhospho [S8]	0	0	0	0	0	0	0	0	0	0	0	0	0	0	0	0	0	0	0	0	0	0	0	0	0	0	0	0	0	0	0	0	0	0	0	0	0	0	0	0	0	0	0
Q9H0M0	NEDD4-like E3 ubiquitin-protein ligase WWP1	WWP1	WWP1	LQLQVTVSSAK	S26	1xPhospho [S9]	0	0	0	0	0	0	0	299456	0	0	0	0	0	0	0	0	0	0	0	0	659574	0	727734	490728	0	0	0	314426	0	0	0	303123	0	0	0	0	0	0	0	0	0	0	0
A0A411HBF4	WWOX isoform 5	WWOX	WWOX	YAGLDDTDSEDELPPGWEER	T12	2xPhospho [T7; S/Y]	0	0	0	0	209731	0	362795	0	0	0	0	0	0	0	0	0	0	0	0	0	0	0	0	0	0	0	0	738797	0	0	0	0	0	0	0	0	129996	0	0	3.42444e+06	0	487957	0
A0A411HBF4	WWOX isoform 5	WWOX	WWOX	YAGLDDTDSEDELPPGWEER	T12	1xPhospho [T7]	0	0	0	454182	0	0	861629	908882	0	0	0	0	600709	0	0	0	0	0	0	0	0	0	0	251910	0	0	0	0	0	0	0	168390	0	0	0	0	1.2355e+06	0	553622	681130	0	0	837746
Q9ULE0	Protein WWC3	WWC3	WWC3	RISACLSDYSLASDSGVFEPLTK	S563	1xCarbamidomethyl [C5]; 1xPhospho [S3]	0	0	357109	206436	0	0	0	0	0	0	0	0	0	0	212701	0	192388	0	0	0	106620	0	0	0	0	0	0	0	146869	0	0	0	0	0	0	59409.6	38008.3	0	247805	0	0	0	0
Q9ULE0	Protein WWC3	WWC3	WWC3	SYASSFSGYSTNTK	S74	1xPhospho [S5]	0	0	0	0	1.67088e+06	0	1.42849e+06	1.24696e+06	2.87666e+06	0	1.38628e+06	0	0	0	0	0	0	0	0	0	0	0	0	0	0	0	0	0	0	0	0	0	0	0	0	0	0	0	0	0	0	0	1.33959e+06
Q6AWC2	Protein WWC2	WWC2	WWC2	SQTFSPGER	T1004	1xPhospho [T3]	1.77101e+07	1.01892e+07	4.60801e+06	6.57081e+06	1.58443e+07	1.91996e+07	1.19227e+07	7.11261e+06	8.21766e+06	1.50076e+07	7.82016e+06	1.80568e+07	6.22819e+06	2.12524e+07	0	1.87636e+06	5.86721e+06	3.28355e+06	4.52604e+06	0	6.03813e+06	5.14023e+06	0	0	993091	0	0	0	857934	2.47749e+06	0	0	0	0	0	3.54884e+06	1.47304e+06	0	0	3.66783e+06	2.43852e+06	3.93877e+06	1.29381e+07
Q6AWC2	Protein WWC2	WWC2	WWC2	AGSGQLPLPR	S7	1xPhospho [S3]	0	0	614100	0	0	0	0	0	0	0	0	0	0	0	0	0	0	0	0	0	591964	0	0	0	0	0	0	0	0	0	0	0	0	0	0	444615	0	0	0	0	0	0	416178
Q6AWC2	Protein WWC2	WWC2	WWC2	SEPDLRCSPVNSHLCLSR	S269	2xCarbamidomethyl [C7; C15]; 1xPhospho [S8]	0	0	1.29583e+06	0	0	1.42971e+06	0	641434	0	0	0	0	0	0	0	0	0	0	0	0	0	0	0	0	0	0	0	0	0	1.21209e+06	0	0	0	0	2.1605e+06	0	0	0	0	0	0	0	0
Q6AWC2	Protein WWC2	WWC2	WWC2	EPLYEGTADVEKSLPK	S641	1xPhospho [S13]	0	0	363400	0	0	0	0	0	0	0	0	1.80752e+06	0	0	0	0	0	0	0	0	1.01998e+06	0	514568	474912	0	0	0	0	0	0	0	877480	0	0	0	0	0	0	0	0	0	0	0
H3BLZ3	Protein KIBRA (Fragment)	WWC1	WWC1	VDKETNTETPAPSPTVVRPK	S861	1xPhospho [S13]	0	0	1.05235e+07	0	7.32615e+06	1.02809e+07	9.22446e+06	0	0	0	5.75025e+06	4.59335e+06	2.25618e+07	0	2.07093e+07	0	0	6.09191e+06	0	7.71945e+06	1.07735e+07	0	7.61948e+06	7.72064e+06	4.07619e+06	0	1.22021e+07	7.03809e+06	5.4681e+06	5.97174e+06	0	2.29429e+06	0	1.91357e+07	6.54988e+06	1.52988e+07	9.121e+06	1.66299e+06	1.622e+07	7.89002e+06	3.89457e+06	0	0
H3BLZ3	Protein KIBRA (Fragment)	WWC1	WWC1	ETNTETPAPSPTVVRPK	S861	1xPhospho [S10]	0	0	1.40675e+06	1.47446e+06	0	1.73474e+06	3.85358e+06	0	0	0	605214	0	9.44842e+06	0	2.26922e+06	0	0	0	0	1.06014e+06	2.32978e+06	0	764653	0	0	1.36438e+06	1.29758e+06	434198	0	0	0	0	0	1.69264e+06	0	3.34849e+06	1.15698e+06	0	0	1.11412e+07	2.20096e+06	0	934742
H3BLZ3	Protein KIBRA (Fragment)	WWC1	WWC1	MSDAQGSYKLDEAQAVLR	S170	1xPhospho [S7]; 1xOxidation [M1]	0	0	0	0	2.15535e+06	0	0	0	0	0	0	0	1.57734e+06	0	0	0	1.89448e+06	0	0	1.0068e+06	806378	0	0	0	0	0	0	1.61522e+06	0	0	0	0	0	0	0	0	0	0	1.26516e+06	0	0	0	576655
H3BLZ3	Protein KIBRA (Fragment)	WWC1	WWC1	VGTPSQGPFLR	T874	1xPhospho [T3]	0	0	0	0	0	0	0	0	0	0	0	0	0	0	0	0	0	0	0	0	583294	0	0	0	0	0	0	0	0	0	0	0	0	0	0	1.86672e+06	0	0	0	0	0	0	0
Q9BUR4	Telomerase Cajal body protein 1	WRAP53	WDR79;WRAP53	GDPPRLSPDPVAGSAVSQELR	S54	1xPhospho [S7]	0	3.4236e+06	1.84987e+07	0	8.39116e+06	1.73532e+06	2.69351e+06	1.08458e+07	3.52851e+06	0	9.70128e+06	0	442804	0	8.30883e+06	0	0	4.31624e+06	0	1.67515e+07	3.38376e+07	295116	0	2.33045e+07	1.58167e+07	1.69788e+06	3.06828e+06	4.02343e+07	1.44021e+07	0	7.29123e+06	7.34755e+06	0	0	0	3.92612e+06	1.34462e+07	3.35358e+06	7.19237e+06	0	1.35289e+07	0	0
Q9BUR4	Telomerase Cajal body protein 1	WRAP53	WDR79;WRAP53	NADSELMPPPPERGDPPRLSPDPVAGSAVSQELR	S54	1xPhospho [S20]	187097	1.65163e+06	894674	0	0	0	689511	0	0	0	0	0	0	280230	0	427205	0	75481.5	277892	54782.1	58986.3	0	161710	0	0	0	0	1.28875e+06	0	0	199277	0	0	0	0	768809	0	578133	0	0	0	0	0
H0Y7R3	Non-specific serine/threonine protein kinase (Fragment)	WNK2	WNK2;WNK1	QASLPVSGSVAGDFVK	S1429	1xPhospho [S3]	0	424385	794782	0	75925.5	0	0	0	0	0	33467	0	0	0	356176	0	0	0	0	49743.4	38749.2	0	54495.2	0	0	0	0	2.27683e+06	1.28901e+06	0	0	0	0	0	0	0	0	149255	47314.6	0	0	0	0
H0Y7R3	Non-specific serine/threonine protein kinase (Fragment)	WNK2	WNK2;WNK1	AGSLGPETPSR	S1456	1xPhospho [S3]	0	0	825735	2.88914e+06	1.09415e+06	2.2728e+06	1.05669e+06	912475	0	0	2.96869e+06	1.42533e+06	1.25441e+07	0	4.3767e+06	8.4874e+06	3.35945e+06	1.62156e+06	1.36507e+06	2.47842e+06	3.01171e+06	2.20356e+06	6.65046e+06	0	7.01746e+06	0	1.87392e+06	1.63601e+07	1.06127e+06	0	0	844158	9.21155e+07	4.55007e+06	683650	987680	0	0	0	2.50012e+06	1.53597e+07	3.52573e+06	2.13482e+07
H0Y7R3	Non-specific serine/threonine protein kinase (Fragment)	WNK2	WNK2;WNK1	VGFVDSTIK	T1152	1xPhospho [T7]	0	0	0	761223	0	0	0	0	0	0	0	0	0	0	0	0	1.56288e+06	706385	1.11212e+06	459651	638757	0	0	427296	0	710196	431362	0	0	678755	0	663153	0	5.34527e+06	3.90631e+06	0	0	409706	371668	0	0	0	0
D3DUP2	Non-specific serine/threonine protein kinase	WNK1	WNK2;WNK1;WNK4	DRPVSQPSLVGSKEEPPPAR	S170	2xPhospho [S8; S]	8.36553e+06	3.93248e+06	5.94357e+06	0	9.379e+06	8.51239e+06	8.03276e+06	4.81707e+06	8.88202e+06	1.11183e+07	8.42155e+06	8.23984e+06	4.39481e+06	3.58006e+06	6.41492e+06	0	4.95822e+06	7.20268e+06	6.8557e+06	4.96321e+06	2.16373e+06	0	4.06406e+06	0	5.71331e+06	0	4.88551e+06	3.74589e+06	0	3.97362e+06	0	2.02391e+06	5.31978e+06	5.71015e+06	3.44262e+06	3.67432e+06	2.44934e+06	1.81308e+06	6.26408e+06	1.17602e+07	7.94783e+06	0	7.96633e+06
D3DUP2	Non-specific serine/threonine protein kinase	WNK1	WNK2;WNK1;WNK4	ADEMLSEDVSVEPEGDQGLESLQGKDDYGFSGSQK	S933	1xPhospho [S21]; 1xOxidation [M4]	378328	921371	0	0	0	0	0	751512	0	0	310988	0	0	0	0	0	588590	0	0	90480.8	1.49046e+06	0	0	0	168399	223218	0	0	0	0	0	0	691734	370433	0	0	0	0	0	0	0	0	0
D3DUP2	Non-specific serine/threonine protein kinase	WNK1	WNK2;WNK1;WNK4	FQVSVAADGAQK	S1588	1xPhospho [S4]	4.59527e+07	2.3995e+07	2.0853e+07	2.64333e+07	3.69367e+07	1.64714e+07	2.89554e+07	3.10539e+07	3.08733e+07	1.3688e+07	3.88745e+07	1.52302e+07	5.02836e+07	2.17602e+07	2.87981e+07	2.74863e+07	1.87187e+07	2.39808e+07	1.81264e+07	5.81137e+07	4.60258e+07	7.85698e+06	3.7416e+07	5.52845e+07	1.37176e+07	2.72036e+07	1.8828e+07	2.52161e+07	1.76497e+07	2.73723e+07	1.27999e+07	1.30813e+07	1.15837e+07	4.57469e+07	2.1284e+07	1.12487e+07	6.1401e+06	1.31755e+07	2.77938e+07	5.30291e+07	4.99377e+07	1.11369e+07	2.94673e+07
D3DUP2	Non-specific serine/threonine protein kinase	WNK1	WNK2;WNK1;WNK4	SVIGTPEFMAPEMYEEK	S382	1xPhospho [S1]; 1xOxidation [M]	249086	568793	827709	408772	122626	0	40315.5	0	0	160525	162249	113186	81834.7	0	443853	217592	475172	214742	443135	139911	219267	0	0	254828	0	372057	108099	361349	33764.9	0	407775	214817	0	400001	260494	636548	1.85787e+06	0	0	0	0	0	2.11998e+06
D3DUP2	Non-specific serine/threonine protein kinase	WNK1	WNK2;WNK1;WNK4	SVHFESSTSESSVLSSSSPESTLVKPEPNGITIPGISSDVPESAHK	T1638	1xPhospho [T32]	0	0	0	0	0	135781	174848	0	0	0	119855	0	0	0	317841	463069	552592	0	258706	0	0	0	0	0	306539	0	222401	0	0	391244	0	133811	0	0	734875	0	0	0	163724	0	0	0	0
D3DUP2	Non-specific serine/threonine protein kinase	WNK1	WNK2;WNK1;WNK4	SGSGGGSAKEPQEER	S185	1xPhospho [S3]	0	0	0	0	0	0	0	0	0	0	0	0	0	0	0	0	0	0	0	0	0	0	0	0	0	0	0	0	0	0	0	0	0	0	774006	0	0	0	0	0	0	0	0
D3DUP2	Non-specific serine/threonine protein kinase	WNK1	WNK2;WNK1;WNK4	DVDDGSGSPHSPHQLSSK	S1752	3xPhospho [S6; S8; S11]	0	0	910901	1.49085e+06	0	0	1.06623e+06	3.51634e+06	0	0	5.22472e+06	0	1.45303e+07	0	1.31693e+06	3.10001e+06	0	1.36754e+06	0	4.15765e+06	0	0	2.55576e+06	2.0276e+06	0	917457	0	939867	0	0	6.80767e+06	4.70579e+06	0	854600	0	0	2.06526e+06	0	1.80596e+06	1.6129e+07	0	8.5081e+06	2.6417e+06
D3DUP2	Non-specific serine/threonine protein kinase	WNK1	WNK2;WNK1;WNK4	DVDDGSGSPHSPHQLSSK	S1754	3xPhospho [S6; S8; S11]	0	0	910901	1.49085e+06	0	0	1.06623e+06	3.51634e+06	0	0	5.22472e+06	0	1.45303e+07	0	1.31693e+06	3.10001e+06	0	1.36754e+06	0	4.15765e+06	0	0	2.55576e+06	2.0276e+06	0	917457	0	939867	0	0	6.80767e+06	4.70579e+06	0	854600	0	0	2.06526e+06	0	1.80596e+06	1.6129e+07	0	8.5081e+06	2.6417e+06
D3DUP2	Non-specific serine/threonine protein kinase	WNK1	WNK2;WNK1;WNK4	DVDDGSGSPHSPHQLSSK	S1757	3xPhospho [S6; S8; S11]	0	0	910901	1.49085e+06	0	0	1.06623e+06	3.51634e+06	0	0	5.22472e+06	0	1.45303e+07	0	1.31693e+06	3.10001e+06	0	1.36754e+06	0	4.15765e+06	0	0	2.55576e+06	2.0276e+06	0	917457	0	939867	0	0	6.80767e+06	4.70579e+06	0	854600	0	0	2.06526e+06	0	1.80596e+06	1.6129e+07	0	8.5081e+06	2.6417e+06
D3DUP2	Non-specific serine/threonine protein kinase	WNK1	WNK2;WNK1;WNK4	RGSKGHMNYEGPGMAR	S1995	1xPhospho [S3]	7.33012e+07	5.25103e+07	3.25489e+07	5.41274e+07	4.96876e+07	3.03207e+07	4.70714e+07	6.2985e+07	3.91083e+07	4.35802e+07	5.21524e+07	2.32939e+07	6.37387e+07	4.78478e+07	3.68733e+07	6.09005e+07	6.14142e+07	5.50686e+07	5.52119e+07	9.35857e+07	1.02563e+08	5.2007e+07	7.21551e+07	9.62438e+07	5.35067e+07	9.57737e+07	6.15863e+07	8.21292e+07	6.09189e+07	2.99304e+07	8.94058e+07	9.89223e+07	7.52643e+07	6.70066e+07	1.08082e+08	7.08839e+07	1.26918e+08	7.4885e+07	5.29882e+07	4.90793e+07	6.48795e+07	9.90133e+07	5.17114e+07
D3DUP2	Non-specific serine/threonine protein kinase	WNK1	WNK2;WNK1;WNK4	VGRFSVSKTEDK	S1684	1xPhospho [S5]	1.04523e+07	5.35066e+06	3.98584e+06	7.96212e+06	5.28955e+06	5.39242e+06	7.29808e+06	1.04163e+07	6.00723e+06	6.13791e+06	4.13324e+06	5.50246e+06	2.65407e+06	1.11935e+07	1.20535e+07	6.16185e+06	1.24429e+07	9.76144e+06	8.40376e+06	5.86504e+06	5.80135e+06	4.47712e+06	6.0584e+06	1.56034e+07	1.06257e+07	6.63224e+06	8.0035e+06	4.64244e+06	1.00641e+07	8.59969e+06	5.83561e+06	1.17805e+07	1.51321e+07	1.23773e+07	0	1.97958e+07	1.18821e+07	1.09062e+07	5.62062e+06	0	0	0	844580
D3DUP2	Non-specific serine/threonine protein kinase	WNK1	WNK2;WNK1;WNK4	EPQEERSQQQDDIEELETK	S198	1xPhospho [S7]	0	0	1.60526e+06	835588	0	0	0	0	0	0	723599	0	0	0	1.29474e+06	0	3.79493e+06	0	0	594351	0	0	0	1.35421e+06	0	2.31914e+06	1.48844e+06	582122	0	0	3.6097e+06	879778	0	929443	1.47384e+06	2.37182e+06	0	0	1.10655e+06	4.12804e+06	3.64442e+06	1.12058e+07	1.20604e+06
D3DUP2	Non-specific serine/threonine protein kinase	WNK1	WNK2;WNK1;WNK4	EKPELSEPSHLNGPSSDPEAAFLSR	S1736	2xPhospho [S15; S16]	204536	0	385651	0	188184	0	1.03135e+06	1.29861e+06	0	0	401285	0	0	0	0	0	0	0	133351	508086	734248	0	60202.7	0	0	58553.1	665599	491409	0	0	45715.9	56712	0	79111.7	0	0	0	0	0	0	0	0	0
D3DUP2	Non-specific serine/threonine protein kinase	WNK1	WNK2;WNK1;WNK4	EKPELSEPSHLNGPSSDPEAAFLSR	S1737	2xPhospho [S15; S16]	204536	0	385651	0	188184	0	1.03135e+06	1.29861e+06	0	0	401285	0	0	0	0	0	0	0	133351	508086	734248	0	60202.7	0	0	58553.1	665599	491409	0	0	45715.9	56712	0	79111.7	0	0	0	0	0	0	0	0	0
D3DUP2	Non-specific serine/threonine protein kinase	WNK1	WNK2;WNK1;WNK4	LGAAAADAVTGR	T48	1xPhospho [T10]	1.5471e+06	0	1.73444e+06	0	1.25677e+06	0	0	782948	0	0	0	0	0	0	0	0	0	0	0	763788	0	0	0	0	1.74441e+06	955489	0	1.32341e+06	2.20611e+06	0	0	2.48449e+06	0	7.44447e+06	1.82868e+06	1.69637e+06	0	0	0	2.1751e+06	0	0	713576
D3DUP2	Non-specific serine/threonine protein kinase	WNK1	WNK2;WNK1;WNK4	GSKGHMNYEGPGMAR	S1995	1xPhospho [S2]; 2xOxidation [M6; M13]	0	0	0	0	0	0	0	0	0	0	0	0	0	0	0	0	0	0	0	0	0	0	0	0	0	0	0	0	0	0	0	0	0	0	0	0	0	0	0	1.34573e+06	0	0	1.01344e+06
D3DUP2	Non-specific serine/threonine protein kinase	WNK1	WNK2;WNK1;WNK4	SVIGTPEFMAPEMYEEK	S382	1xPhospho [S1]	502664	1.01603e+06	0	395695	0	179948	180822	93350.9	0	0	0	526167	0	215032	509648	997058	371005	161602	0	0	0	0	336175	92906.8	347865	286021	466905	0	0	350627	0	0	363385	370452	356652	152956	0	0	337247	0	201267	0	228504
D3DUP2	Non-specific serine/threonine protein kinase	WNK1	WNK2;WNK1;WNK4	RGSKGHMNYEGPGMAR	S1995	1xPhospho [S3]; 2xOxidation [M7; M14]	0	0	0	0	0	0	0	0	0	0	0	0	0	0	369615	0	0	0	279788	0	0	0	378534	0	0	1.13593e+06	0	0	0	0	0	0	0	2.18361e+06	2.25242e+06	0	0	0	570589	0	0	0	0
D3DUP2	Non-specific serine/threonine protein kinase	WNK1	WNK2;WNK1;WNK4	FQVTTTANK	T1674	1xPhospho [T4]	2.69127e+06	571419	2.13308e+06	990303	0	1.74418e+06	0	0	666532	2.641e+06	1.0581e+06	0	0	0	1.51329e+06	1.07239e+06	1.26647e+06	0	0	419948	0	0	849937	3.46507e+06	1.01467e+06	0	0	3.84446e+06	0	0	0	1.46773e+06	0	0	0	2.73822e+06	0	2.29001e+06	0	0	0	0	0
D3DUP2	Non-specific serine/threonine protein kinase	WNK1	WNK2;WNK1;WNK4	SVIGTPEFMAPEMYEEK	S382	1xPhospho [S1]; 2xOxidation [M9; M13]	0	2.96109e+06	0	0	0	2.78837e+06	0	0	0	441710	0	0	0	0	912941	0	276537	59785.7	0	0	482578	833561	106870	704845	87087.1	0	565120	0	0	0	111781	0	0	242853	1.0224e+06	0	737652	0	0	0	0	0	0
B9EGQ5	Protein Wiz	WIZ	WIZ	SPQLSLSPRPASPK	S193	2xPhospho [S7; S12]	1.49069e+07	3.98276e+06	9.74571e+06	9.13194e+06	8.30626e+06	6.19856e+06	1.12227e+07	1.42965e+07	6.81874e+06	1.72849e+07	1.63363e+07	1.67048e+07	0	325400	1.61336e+07	1.4283e+07	9.83558e+06	9.29699e+06	1.34408e+07	8.76877e+06	1.09837e+07	0	1.28075e+07	0	1.00045e+07	1.72157e+07	9.90723e+06	1.9997e+07	9.49392e+06	1.11844e+07	1.31157e+07	4.61809e+06	0	0	1.07306e+07	1.23698e+07	1.08304e+07	2.67476e+07	9.37965e+06	1.48179e+07	1.48879e+07	3.48126e+06	1.12775e+07
B9EGQ5	Protein Wiz	WIZ	WIZ	SPQLSLSPRPASPK	S198	2xPhospho [S7; S12]	1.49069e+07	3.98276e+06	9.74571e+06	9.13194e+06	8.30626e+06	6.19856e+06	1.12227e+07	1.42965e+07	6.81874e+06	1.72849e+07	1.63363e+07	1.67048e+07	0	325400	1.61336e+07	1.4283e+07	9.83558e+06	9.29699e+06	1.34408e+07	8.76877e+06	1.09837e+07	0	1.28075e+07	0	1.00045e+07	1.72157e+07	9.90723e+06	1.9997e+07	9.49392e+06	1.11844e+07	1.31157e+07	4.61809e+06	0	0	1.07306e+07	1.23698e+07	1.08304e+07	2.67476e+07	9.37965e+06	1.48179e+07	1.48879e+07	3.48126e+06	1.12775e+07
B9EGQ5	Protein Wiz	WIZ	WIZ	NPEDKSPQLSLSPRPASPK	S193	2xPhospho [S12; S17]	2.04611e+06	0	1.89806e+06	1.80771e+06	2.37059e+06	3.09887e+06	4.6163e+06	2.48258e+06	932719	4.64475e+06	3.95169e+06	2.20523e+06	0	4.39516e+06	1.21749e+07	2.00758e+06	0	1.38828e+06	3.08505e+06	3.12508e+06	1.66545e+06	0	2.84171e+06	0	2.99265e+06	3.6517e+06	4.64959e+06	0	2.0419e+06	4.99703e+06	4.79774e+06	980703	4.80958e+06	0	1.96626e+06	1.8229e+06	1.09707e+06	6.21094e+06	8.95678e+06	4.72794e+06	3.55092e+06	0	2.82105e+06
B9EGQ5	Protein Wiz	WIZ	WIZ	NPEDKSPQLSLSPRPASPK	S198	2xPhospho [S12; S17]	2.04611e+06	0	1.89806e+06	1.80771e+06	2.37059e+06	3.09887e+06	4.6163e+06	2.48258e+06	932719	4.64475e+06	3.95169e+06	2.20523e+06	0	4.39516e+06	1.21749e+07	2.00758e+06	0	1.38828e+06	3.08505e+06	3.12508e+06	1.66545e+06	0	2.84171e+06	0	2.99265e+06	3.6517e+06	4.64959e+06	0	2.0419e+06	4.99703e+06	4.79774e+06	980703	4.80958e+06	0	1.96626e+06	1.8229e+06	1.09707e+06	6.21094e+06	8.95678e+06	4.72794e+06	3.55092e+06	0	2.82105e+06
B9EGQ5	Protein Wiz	WIZ	WIZ	NPEDKSPQLSLSPRPASPK	S198	1xPhospho [S17]	0	0	0	0	0	0	0	0	0	0	0	0	0	0	2.86478e+06	0	0	0	0	0	0	0	0	0	0	0	0	0	0	0	0	0	0	0	0	0	0	0	6.12603e+06	0	0	0	0
B9EGQ5	Protein Wiz	WIZ	WIZ	TQSRPGGPPNPPGPSPK	S287	1xPhospho [S15]	760986	0	1.24005e+06	803266	0	0	0	1.87369e+06	0	0	0	0	0	0	1.6116e+06	0	928708	0	1.13044e+06	1.36434e+06	0	0	0	0	0	560819	0	7.15154e+06	0	0	1.98456e+06	2.42105e+06	0	0	1.20841e+06	896910	816591	2.11505e+06	810213	0	0	0	745662
B9EGQ5	Protein Wiz	WIZ	WIZ	AADGGERPLAASPPGTVK	S698	1xPhospho [S12]	7.31239e+06	2.10173e+06	5.14326e+06	7.02009e+06	2.86487e+06	4.90225e+06	7.62625e+06	8.62193e+06	4.97312e+06	1.07452e+07	7.81012e+06	1.0166e+07	2.34389e+06	4.83691e+06	1.35829e+07	3.15311e+06	4.32403e+06	1.82898e+06	8.39554e+06	9.85037e+06	2.54357e+06	0	5.08724e+06	0	5.62765e+06	7.50136e+06	6.11458e+06	1.21747e+07	4.47975e+06	9.81523e+06	1.19744e+07	2.01743e+06	9.31142e+06	3.83539e+06	6.92603e+06	4.16784e+06	7.95713e+06	1.27985e+07	6.49816e+06	8.67653e+06	8.61e+06	0	8.93501e+06
B9EGQ5	Protein Wiz	WIZ	WIZ	SPQLSLSPRPASPK	S198	1xPhospho [S12]	0	0	0	0	0	0	0	0	0	0	0	0	0	0	860154	0	0	0	0	0	0	0	0	0	0	0	0	0	0	0	0	0	0	0	0	0	0	0	2.77241e+06	0	0	0	0
B9EGQ5	Protein Wiz	WIZ	WIZ	NPEDKSPQLSLSPRPASPK	S191	3xPhospho [S10; S12; S17]	0	0	3.68278e+06	2.41896e+06	1.40538e+06	0	2.11504e+06	1.64544e+06	0	1.73486e+06	2.15017e+06	0	0	0	2.58075e+06	2.09131e+06	2.00608e+06	1.2521e+06	0	1.99961e+06	859423	2.95484e+06	1.20002e+06	770711	1.6373e+06	2.23135e+06	3.13228e+06	3.80281e+06	0	1.63324e+06	4.47585e+06	981538	0	3.48811e+06	1.35161e+06	0	0	3.86846e+06	1.09467e+06	0	0	0	828603
B9EGQ5	Protein Wiz	WIZ	WIZ	NPEDKSPQLSLSPRPASPK	S193	3xPhospho [S10; S12; S17]	0	0	3.68278e+06	2.41896e+06	1.40538e+06	0	2.11504e+06	1.64544e+06	0	1.73486e+06	2.15017e+06	0	0	0	2.58075e+06	2.09131e+06	2.00608e+06	1.2521e+06	0	1.99961e+06	859423	2.95484e+06	1.20002e+06	770711	1.6373e+06	2.23135e+06	3.13228e+06	3.80281e+06	0	1.63324e+06	4.47585e+06	981538	0	3.48811e+06	1.35161e+06	0	0	3.86846e+06	1.09467e+06	0	0	0	828603
B9EGQ5	Protein Wiz	WIZ	WIZ	NPEDKSPQLSLSPRPASPK	S198	3xPhospho [S10; S12; S17]	0	0	3.68278e+06	2.41896e+06	1.40538e+06	0	2.11504e+06	1.64544e+06	0	1.73486e+06	2.15017e+06	0	0	0	2.58075e+06	2.09131e+06	2.00608e+06	1.2521e+06	0	1.99961e+06	859423	2.95484e+06	1.20002e+06	770711	1.6373e+06	2.23135e+06	3.13228e+06	3.80281e+06	0	1.63324e+06	4.47585e+06	981538	0	3.48811e+06	1.35161e+06	0	0	3.86846e+06	1.09467e+06	0	0	0	828603
M0QXA7	Protein Wiz	WIZ	WIZ	AQWPQSEDEGPLNLTLDSDGGR	S209	1xPhospho [S6]	0	0	0	0	0	0	0	0	0	0	0	0	0	349641	0	0	0	201594	0	0	159746	0	0	0	0	0	0	0	0	0	0	0	0	773971	0	112507	138215	0	147279	0	0	0	171133
Q9Y4P8	WD repeat domain phosphoinositide-interacting protein 2	WIPI2	WIPI2	LDGSLETTNEILDSASHDCPLVTQTYGAAAGK	S390	1xCarbamidomethyl [C19]; 1xPhospho [S16]	497451	0	0	0	0	0	0	67481.5	0	0	0	0	0	0	0	0	0	0	0	53840.1	0	0	0	0	0	0	117033	0	0	0	0	0	0	0	0	139349	40111.5	245513	0	0	0	0	0
A6NGB9	WAS/WASL-interacting protein family member 3	WIPF3	WIPF3	NGSLHIIDDFESK	S412	1xPhospho [S3]	0	0	0	0	62315	0	0	0	0	0	1.03697e+06	0	0	0	0	0	0	0	0	0	0	0	0	0	0	0	420836	0	0	0	0	0	0	0	0	0	468109	0	0	2.11143e+06	0	0	0
A6NGB9	WAS/WASL-interacting protein family member 3	WIPF3	WIPF3	TISGPLIPPASPR	S149	1xPhospho [S11]	0	0	0	0	0	0	0	0	0	0	792322	0	0	0	0	0	0	0	0	0	0	0	0	0	0	1.28238e+06	2.08473e+06	427270	977206	0	0	0	0	0	0	577095	593272	1.38484e+06	1.97018e+06	0	0	0	0
Q8TF74	WAS/WASL-interacting protein family member 2	WIPF2	WIPF2;WIRE	EGPPAPPPVKPPPSPVNIR	S235	1xPhospho [S14]	2.90153e+06	7.91502e+06	6.34622e+07	4.71172e+06	8.5355e+06	2.44654e+07	8.19641e+06	4.32198e+06	3.32311e+06	0	1.02172e+07	1.39897e+07	4.9528e+06	0	9.73577e+06	5.9534e+06	0	2.91161e+06	5.2547e+06	6.51995e+06	1.448e+07	9.73842e+06	7.14705e+06	4.99904e+06	1.10668e+06	1.23627e+07	2.80583e+07	2.20902e+07	1.15283e+07	1.6353e+07	2.87055e+07	3.85253e+06	0	6.31906e+06	2.95171e+06	2.00408e+07	6.7969e+06	2.23725e+07	2.42861e+07	0	2.41143e+06	3.01352e+06	4.34827e+06
Q8TF74	WAS/WASL-interacting protein family member 2	WIPF2	WIPF2;WIRE	ANAPPTPLPMHSSK	T191	1xPhospho [T6]; 1xOxidation [M10]	0	0	0	0	0	0	0	0	0	0	0	0	0	8.31455e+06	0	0	2.02399e+06	0	1.35173e+06	0	1.21352e+06	0	0	374569	1.97984e+06	0	823315	0	915374	3.32477e+06	0	0	0	1.97494e+06	1.35353e+06	1.70667e+06	0	1.73962e+06	0	0	0	0	882791
Q8TF74	WAS/WASL-interacting protein family member 2	WIPF2	WIPF2;WIRE	MQRPSLPDLSRPNTTSSTGMK	S155	1xPhospho [S5]; 1xOxidation [M]	0	0	5.60085e+06	1.17565e+06	1.00487e+06	1.5729e+06	1.70329e+06	1.36974e+06	0	0	1.45684e+06	0	0	0	0	0	1.24386e+06	0	0	1.25196e+06	3.70911e+06	0	0	1.35345e+06	746180	0	0	1.49084e+06	648461	0	1.04571e+06	654790	0	0	1.28426e+06	810234	634449	0	4.50537e+06	0	0	1.10574e+07	7.19454e+06
Q8TF74	WAS/WASL-interacting protein family member 2	WIPF2	WIPF2;WIRE	ANAPPTPLPMHSSK	T191	1xPhospho [T6]	2.20197e+06	4.34399e+06	6.69809e+06	2.63878e+06	5.2532e+06	7.94829e+06	4.47384e+06	3.62577e+06	5.57978e+06	7.8483e+06	5.04453e+06	2.46369e+06	6.64575e+06	0	0	0	4.39276e+06	0	0	0	1.622e+06	0	0	0	4.35095e+06	666956	0	2.20362e+06	0	1.61805e+06	0	0	0	0	0	1.93935e+06	3.46141e+06	750705	2.8361e+06	0	0	0	1.52754e+06
Q8TF74	WAS/WASL-interacting protein family member 2	WIPF2	WIPF2;WIRE	MQRPSLPDLSRPNTTSSTGMK	S155	1xPhospho [S5]	0	1.16788e+06	0	0	0	1.16078e+06	791029	0	0	0	0	0	0	0	0	2.21821e+06	0	1.30036e+06	1.13617e+06	0	2.50498e+06	1.14004e+07	0	2.1384e+06	4.15182e+06	0	547817	852991	5.33749e+06	932537	0	0	0	0	0	4.47325e+06	4.90062e+06	0	0	0	1.75194e+06	6.30486e+06	4.02468e+06
Q8TF74	WAS/WASL-interacting protein family member 2	WIPF2	WIPF2;WIRE	GSSGGYGSGGAALQPK	Y74	1xPhospho [Y6]	6.44529e+06	0	5.5682e+06	747699	0	0	0	0	8.30573e+06	0	0	3.05331e+06	0	0	0	0	0	0	0	0	0	8.65897e+06	0	0	0	7.53869e+06	7.46516e+06	0	0	0	1.45168e+07	0	0	0	0	0	0	0	0	0	0	0	0
Q8TF74	WAS/WASL-interacting protein family member 2	WIPF2	WIPF2;WIRE	SFLDDFESK	S391	1xPhospho [S1]	0	0	1.41517e+06	0	0	0	0	0	0	0	0	0	0	0	0	0	0	0	0	0	0	0	0	0	0	0	0	539795	0	0	0	0	0	0	0	366126	0	0	0	0	0	0	449942
Q8TF74	WAS/WASL-interacting protein family member 2	WIPF2	WIPF2;WIRE	EKPLPPTPGQR	T212	1xPhospho [T7]	4.33549e+06	2.85659e+06	1.15313e+07	1.98452e+06	1.32281e+06	3.4071e+06	2.60522e+06	1.06632e+06	3.24794e+06	1.97888e+06	4.31597e+06	0	0	0	1.08709e+06	0	1.99777e+06	0	0	611002	1.00449e+06	0	0	0	0	3.09035e+06	3.36343e+06	1.36169e+06	0	3.9164e+06	0	0	0	712266	0	0	3.38721e+06	1.20186e+06	1.00984e+06	1.64096e+06	0	0	3.24526e+06
Q8TF74	WAS/WASL-interacting protein family member 2	WIPF2	WIPF2;WIRE	ASLPELPR	S144	1xPhospho [S2]	0	0	1.95564e+06	0	0	0	0	748606	1.0259e+06	0	0	0	0	0	0	0	0	0	0	1.09822e+06	0	0	0	0	0	0	1.54638e+06	2.57123e+06	0	0	794295	0	0	0	0	1.51671e+06	0	0	0	0	4.16022e+06	0	2.02887e+06
Q8TF74	WAS/WASL-interacting protein family member 2	WIPF2	WIPF2;WIRE	NGHRDSITTVR	S385	1xPhospho [S6]	0	0	0	0	0	1.21642e+06	843507	0	999361	1.452e+06	2.46946e+06	0	0	0	0	0	1.27912e+06	0	0	1.739e+06	0	0	0	0	0	0	0	0	583093	0	732223	0	0	0	0	913253	1.45635e+06	0	0	0	0	0	0
Q05CW4	WHSC1 protein	WHSC1	WHSC1;NSD2	IQDPTEDAEAEDTPR	T483	1xPhospho [T13]	0	0	0	0	0	0	0	3.70686e+06	0	0	1.54943e+06	0	0	0	0	0	0	0	0	0	0	0	1.63841e+06	0	0	0	0	0	0	0	5.84629e+06	0	0	8.64828e+06	2.37734e+06	1.37442e+06	3.55215e+06	0	0	0	0	0	0
Q05CW4	WHSC1 protein	WHSC1	WHSC1;NSD2	LCSSAETLESHPDIGK	S346	1xCarbamidomethyl [C2]; 1xPhospho [S3]	0	0	1.37699e+06	0	0	0	0	0	0	0	2.74599e+06	0	1.95829e+06	0	0	0	0	0	0	0	0	0	1.23672e+06	0	0	0	1.61531e+06	0	0	0	0	0	0	0	0	0	0	0	0	0	0	0	0
Q05CW4	WHSC1 protein	WHSC1	WHSC1;NSD2	RIQDPTEDAEAEDTPR	T483	1xPhospho [T14]	0	845764	0	0	1.29195e+06	0	0	0	1.30485e+06	0	0	0	0	0	0	0	2.38049e+06	1.08973e+06	0	0	0	0	1.56105e+06	0	0	1.90005e+06	0	2.67534e+06	0	0	1.76109e+06	0	0	0	0	0	0	0	0	1.28195e+07	0	0	6.90796e+06
Q05CW4	WHSC1 protein	WHSC1	WHSC1;NSD2	SSSPSASLTENEVK	S557	1xPhospho [S3]	3.28718e+06	0	3.70372e+06	4.24076e+06	1.71619e+06	0	1.11793e+06	0	0	6.17378e+06	3.15145e+06	0	5.93229e+06	0	1.26286e+06	0	6.69968e+06	5.94855e+06	4.72486e+06	1.89971e+06	0	0	0	0	0	1.60577e+06	0	1.55907e+06	0	9.71984e+06	5.21432e+06	0	0	0	0	0	2.55743e+06	3.5772e+06	1.83983e+06	0	0	0	0
Q8TF30	WASP homolog-associated protein with actin, membranes and microtubules	WHAMM	WHAMM	GVPLSEAGNVKSPK	S606	1xPhospho [S12]	0	0	0	0	0	0	0	0	1.55591e+06	0	0	0	0	0	0	0	0	0	0	0	0	0	0	0	0	2.58324e+06	0	0	0	0	0	0	0	0	0	0	746824	0	0	0	0	0	0
A0A669KAX3	Wolframin	WFS1	WFS1	QLSSETDLER	S167	1xPhospho [S3]	0	0	0	0	0	0	0	0	0	0	0	0	0	0	0	0	0	0	0	0	0	0	0	0	0	0	2.54313e+06	794654	0	0	0	0	0	0	0	1.22118e+06	0	4.82707e+06	0	2.14511e+06	7.55976e+06	4.9521e+06	1.69604e+06
P30291	Wee1-like protein kinase	WEE1	WEE1	LFDTPHTPK	T190	1xPhospho [T7]	0	0	0	0	739848	3.41723e+06	895814	1.4824e+06	0	0	4.82403e+06	0	3.91373e+06	0	0	0	0	0	0	2.29897e+06	1.79869e+06	0	870838	1.36569e+06	2.2362e+06	3.38603e+06	1.19052e+08	2.87219e+06	0	3.02731e+06	2.79969e+06	0	0	0	4.05905e+06	0	5.14001e+06	4.94751e+06	655715	0	0	5.32834e+06	0
P30291	Wee1-like protein kinase	WEE1	WEE1	SPRPDHPGTPPHK	S165	2xPhospho [S1; T9]	0	1.19301e+06	303901	0	0	0	305188	0	0	0	583098	0	880718	0	152152	0	0	0	0	1.47382e+06	0	0	500729	0	0	677449	0	4.70654e+06	0	0	1.19752e+06	621634	0	0	0	0	832147	864344	0	0	0	0	1.65424e+06
P30291	Wee1-like protein kinase	WEE1	WEE1	SPRPDHPGTPPHK	T173	2xPhospho [S1; T9]	0	1.19301e+06	303901	0	0	0	305188	0	0	0	583098	0	880718	0	152152	0	0	0	0	1.47382e+06	0	0	500729	0	0	677449	0	4.70654e+06	0	0	1.19752e+06	621634	0	0	0	0	832147	864344	0	0	0	0	1.65424e+06
Q8N5D0	WD and tetratricopeptide repeats protein 1	WDTC1	WDTC1	KDSISEDEMVLR	S511	1xPhospho [S3]; 1xOxidation [M9]	8.59717e+06	8.33507e+06	1.77562e+07	1.69413e+07	1.59259e+07	1.74618e+07	8.35534e+06	1.44159e+07	1.43608e+07	1.4871e+07	1.8406e+07	1.54065e+06	2.39772e+07	0	1.08577e+07	14129290	0	1.1842e+07	0	1.96777e+06	2.1249e+06	1.23614e+07	1.24444e+07	1.06347e+07	1.10917e+07	0	9.41966e+06	337145	1.05692e+07	1.70295e+07	1.76073e+07	1.46624e+06	2.04061e+07	1.03126e+06	1.57304e+06	1.0905e+07	7.48097e+06	7.21948e+06	1.42538e+07	0	1.52825e+06	3.2209e+07	2.06868e+06
Q8N5D0	WD and tetratricopeptide repeats protein 1	WDTC1	WDTC1	KDSISEDEMVLR	S511	1xPhospho [S3]	1.04028e+07	2.35532e+07	1.35257e+07	8.91934e+06	1.27293e+07	1.93624e+07	1.37724e+07	1.56042e+07	1.70396e+07	1.51995e+07	1.69404e+07	1.17995e+07	2.48943e+07	0	1.37579e+07	1.3821e+07	1.23984e+07	1.28471e+07	1.14194e+07	1.32482e+07	1.68167e+07	1.28085e+07	2.21119e+07	1.49485e+07	8.62604e+06	1.0396e+07	9.58998e+06	1.22491e+07	1.45959e+07	1.48936e+07	1.67533e+07	9.67762e+06	0	1.6124e+07	1.37683e+07	1.16428e+07	8.10114e+06	1.11402e+07	1.11926e+07	2.59714e+07	2.48348e+07	4.21253e+07	2.90091e+07
Q8N5D0	WD and tetratricopeptide repeats protein 1	WDTC1	WDTC1	GHVSPQVELPPYLER	S353	1xPhospho [S4]	0	913648	2.533e+06	0	0	2.80228e+06	1.21302e+06	1.27761e+06	1.4455e+06	0	2.49805e+06	0	0	0	1.59655e+06	0	0	0	0	0	0	0	0	0	0	0	28680.8	1.84938e+06	4.27882e+06	0	0	0	0	0	2.89565e+06	1.95183e+06	1.18633e+06	77037.5	2.97221e+06	0	1.19321e+06	0	912609
Q8N5D0	WD and tetratricopeptide repeats protein 1	WDTC1	WDTC1	STSRKDSISEDEMVLR	S507	2xPhospho [S3; S7]	0	0	0	0	0	0	0	0	0	0	0	0	0	0	0	0	0	0	0	0	0	0	1.02632e+06	0	0	0	0	464777	0	0	784832	0	0	0	0	1.02125e+06	0	0	0	2.14666e+06	0	2.30163e+06	0
Q8N5D0	WD and tetratricopeptide repeats protein 1	WDTC1	WDTC1	STSRKDSISEDEMVLR	S511	2xPhospho [S3; S7]	0	0	0	0	0	0	0	0	0	0	0	0	0	0	0	0	0	0	0	0	0	0	1.02632e+06	0	0	0	0	464777	0	0	784832	0	0	0	0	1.02125e+06	0	0	0	2.14666e+06	0	2.30163e+06	0
A4D1P6	WD repeat-containing protein 91	WDR91	WDR91;HSPC049	ASSAGPEGGGVRPEQPFIVLGQEEYGEHHSSIMHCR	S382	1xCarbamidomethyl [C35]; 1xPhospho [S3]; 1xOxidation [M33]	0	0	0	0	0	0	0	0	0	0	0	0	0	0	0	0	0	0	0	0	0	0	0	0	0	0	0	0	0	0	0	0	0	0	0	0	0	0	0	0	0	0	0
A4D1P6	WD repeat-containing protein 91	WDR91	WDR91;HSPC049	KSPSRLSPAQGPPQPQSSAK	S272	2xPhospho [S2; S4]	0	817690	0	1.93393e+06	0	2.11462e+06	0	0	0	0	1.65552e+06	0	1.09768e+06	0	1.81514e+06	0	0	1.35163e+06	1.54287e+06	0	0	0	0	1.00835e+06	0	1.08886e+06	0	0	0	0	0	0	0	0	0	0	0	0	2.00955e+06	0	0	0	0
A4D1P6	WD repeat-containing protein 91	WDR91	WDR91;HSPC049	KSPSRLSPAQGPPQPQSSAK	S274	2xPhospho [S2; S4]	0	817690	0	1.93393e+06	0	2.11462e+06	0	0	0	0	1.65552e+06	0	1.09768e+06	0	1.81514e+06	0	0	1.35163e+06	1.54287e+06	0	0	0	0	1.00835e+06	0	1.08886e+06	0	0	0	0	0	0	0	0	0	0	0	0	2.00955e+06	0	0	0	0
A4D1P6	WD repeat-containing protein 91	WDR91	WDR91;HSPC049	ELFSTTTSQCAEK	S345	1xCarbamidomethyl [C10]; 1xPhospho [S4]	1.26925e+06	870997	2.08638e+06	0	0	0	0	0	0	0	0	0	0	0	854558	0	0	0	1.38484e+06	0	0	0	0	0	0	0	0	0	0	0	0	0	0	0	1.02621e+06	0	0	1.35061e+06	0	0	0	0	0
A4D1P6	WD repeat-containing protein 91	WDR91	WDR91;HSPC049	NASLSQSPR	S252	1xPhospho [S3]	3.35302e+06	2.56455e+06	5.5957e+06	0	0	3.33047e+06	0	0	0	0	0	0	0	0	0	0	0	0	0	3.79208e+06	0	0	0	0	0	0	4.81445e+06	0	0	0	0	0	0	0	0	3.81813e+06	4.27782e+06	0	2.22802e+06	0	0	7.84879e+06	0
C6ZGQ9	WDR79 (Fragment)	WDR79	WDR79;WRAP53	GDPPRLSPDPVAGSAVSQELGEGDPVSLSTPLETEFGSPSELSPR	S54	1xPhospho [S7]	0	0	0	0	0	0	0	0	397447	0	105557	0	0	0	0	0	0	0	0	0	160525	130671	0	235169	0	0	302124	363624	0	0	98591.7	216195	0	244278	0	0	99452.7	238479	0	0	0	0	0
A0A024R0H7	Testis tissue sperm-binding protein Li 44a	WDR77	WDR77	KETPPPLVPPAAR	T5	1xPhospho [T3]	1.16253e+08	6.82495e+07	6.29662e+07	7.14496e+07	1.63405e+08	1.04171e+08	1.47907e+08	2.33142e+08	2.1682e+08	1.20329e+08	1.4046e+08	1.22517e+08	3.91382e+08	447699	171643927	1.1123e+08	1.45629e+08	1.23762e+08	9.95903e+07	1.47588e+08	2.00035e+08	1.14911e+08	1.41144e+08	2.20466e+08	217482119	9.99701e+07	1.96178e+08	318277909	2.6524e+08	1.75374e+08	7.42168e+07	1.37654e+08	172415	3.27477e+08	2.69826e+08	2.30753e+08	1.17216e+08	1.58048e+08	1.96026e+08	2.77371e+08	3.05211e+08	5.67723e+07	1.93579e+08
A0A024R0H7	Testis tissue sperm-binding protein Li 44a	WDR77	WDR77	MRKETPPPLVPPAAR	T5	1xPhospho [T5]	1.03303e+06	1.28127e+06	665451	0	1.44535e+06	1.42295e+06	1.37041e+06	1.93087e+06	0	0	1.51077e+06	0	0	0	1.83301e+06	0	0	0	0	1.3887e+06	1.44207e+06	1.95927e+06	2.41164e+06	1.58154e+06	0	1.14533e+06	1.41878e+06	3.07378e+06	2.65234e+06	0	1.33152e+06	1.0892e+06	0	2.56827e+06	1.59823e+06	2.59578e+06	0	2.60044e+06	3.41258e+06	2.36307e+06	1.53035e+06	3.92374e+06	3.19891e+06
A0A024R0H7	Testis tissue sperm-binding protein Li 44a	WDR77	WDR77	DATWSPLNHSLLTTVGWDHQVVHHVVPTEPLPAPGPASVTE	S339	1xPhospho [S38]	609647	0	0	0	100839	0	0	0	135581	204337	92281	0	0	0	220757	0	285400	0	0	62871.7	0	0	91052.6	0	0	143022	434939	96915.1	0	0	0	84829.9	0	0	0	215824	67007.1	808549	0	0	0	0	0
A0A024R0H7	Testis tissue sperm-binding protein Li 44a	WDR77	WDR77	ETPPPLVPPAAR	T5	1xPhospho [T2]	0	0	0	0	0	0	0	984556	0	0	0	0	0	0	0	0	0	629603	0	0	0	0	0	942466	0	0	0	1.16029e+06	0	0	0	0	0	0	0	876723	550475	0	0	0	0	0	546302
H0YFP2	WD repeat-containing protein 74 (Fragment)	WDR74	WDR74	KLSGLEQPQGALQTR	S14	1xPhospho [S3]	0	536398	2.25834e+06	0	464278	567776	1.53484e+06	0	0	0	0	0	0	0	0	0	0	0	984382	0	0	0	0	0	0	0	1.65847e+06	7.68923e+06	435794	0	0	0	0	0	0	447906	0	0	0	0	0	0	0
Q9NW82	WD repeat-containing protein 70	WDR70	WDR70	TMFAQVESDDEEAKNEPEWK	S638	1xPhospho [S8]; 1xOxidation [M2]	7.506e+06	1.91231e+07	3.48641e+07	2.68081e+07	1.70168e+07	5.12942e+06	1.48196e+07	2.35907e+07	1.14146e+07	1.94811e+07	2.74158e+07	1.22483e+07	2.67746e+06	2.2566e+06	1.77774e+07	1.69851e+07	1.56262e+07	1.31027e+07	7.32905e+06	2.34336e+07	1.38963e+07	2.29067e+07	9.83853e+06	1.38643e+07	5.91425e+06	1.62851e+07	1.3277e+07	1.18404e+07	1.55537e+07	1.61597e+07	3.23017e+07	7.59002e+06	3.22204e+06	1.0735e+07	5.77293e+06	5.12997e+06	1.1479e+07	8.44071e+06	1.66979e+07	0	0	0	4.1274e+06
Q9NW82	WD repeat-containing protein 70	WDR70	WDR70	TMFAQVESDDEEAKNEPEWK	S638	1xPhospho [S8]	1.01845e+07	3.80472e+07	2.37091e+07	5.37709e+06	1.1234e+07	1.1998e+07	1.5018e+07	2.38016e+07	1.16538e+07	776691	1.82218e+07	1.53779e+07	0	0	9.72995e+06	4.77458e+06	16489708	1.54963e+07	9.50333e+06	3.8121e+07	2.53296e+07	2.22749e+07	1.82619e+07	3.03728e+07	4.67014e+06	1.74327e+07	1.92802e+07	2.60458e+07	3.92591e+07	1.34611e+07	4.69939e+07	1.00295e+07	1.75011e+06	7.27195e+06	1.60969e+07	1.81817e+07	1.91678e+07	1.40373e+07	1.02576e+07	0	0	0	4.7556e+06
Q9NW82	WD repeat-containing protein 70	WDR70	WDR70	AAEDSPYWVSPAYSK	S616	1xPhospho [S5]	0	1.16926e+06	1.32786e+06	0	0	0	0	0	0	0	0	0	0	0	0	0	0	0	0	0	0	0	0	0	0	1.18526e+06	0	0	0	0	1.74137e+06	1.93743e+06	0	0	0	0	0	0	0	0	0	475731	0
Q9Y4E6	WD repeat-containing protein 7	WDR7	WDR7	ARGSPPTSSNIVQGQIK	S935	1xPhospho [S4]	0	0	3.48326e+06	0	2.11254e+06	1.80592e+06	3.42199e+06	3.03963e+06	0	0	2.16328e+06	0	1.89243e+06	0	1.19578e+06	0	0	666301	0	690129	5.35121e+06	0	0	788077	0	1.98648e+06	3.85183e+06	6.11129e+06	8.20987e+06	1.50058e+06	941675	2.16041e+06	0	5.56454e+06	6.29616e+06	6.95283e+06	2.08168e+06	4.98012e+06	1.06894e+07	2.85192e+06	0	0	0
Q9Y4E6	WD repeat-containing protein 7	WDR7	WDR7	GSPPTSSNIVQGQIK	S935	1xPhospho [S2]	0	0	0	0	0	0	866325	837968	0	0	0	0	1.67054e+06	0	0	0	0	0	0	0	0	0	0	0	0	0	0	0	1.89894e+06	0	0	0	0	0	3.05816e+06	1.62683e+06	2.21645e+06	0	1.23116e+06	0	0	0	0
A0A024RBT0	WD repeat domain 66, isoform CRA_a	WDR66	CFAP251;WDR66	SKLSLQLEDAETDELLR	S142	1xPhospho [S4]	0	0	114746	0	141843	111754	66188.5	0	146345	0	0	0	0	0	0	0	146450	0	0	0	0	0	81252.8	71704.6	0	0	88998.6	0	0	0	0	0	0	0	0	0	0	113309	0	0	0	0	0
O43379	WD repeat-containing protein 62	WDR62	WDR62;DKFZp434J046	TRLSTASEETVQNR	S49	1xPhospho [S4]	0	0	0	1.99656e+06	0	2.00923e+06	0	4.42147e+06	2.46346e+06	2.06598e+06	2.26715e+06	0	0	0	1.38744e+06	0	0	0	0	0	0	0	0	0	0	0	5.33581e+06	4.92096e+06	1.30096e+06	0	0	0	0	3.11174e+06	1.53106e+06	1.99725e+06	0	0	0	0	0	3.99877e+06	0
O43379	WD repeat-containing protein 62	WDR62	WDR62;DKFZp434J046	AGTGYASPDRTHVLAAGK	S1144	1xPhospho [S7]	0	0	0	0	0	0	0	2.69135e+06	0	0	736095	0	0	3.60915e+06	0	2.84173e+06	0	0	0	2.61745e+06	655097	0	0	0	0	1.83286e+06	6.9248e+06	6.0757e+06	0	0	865814	3.62532e+06	0	0	2.89038e+06	3.06716e+06	3.1879e+06	2.69577e+06	855841	0	0	0	1.24494e+06
O43379	WD repeat-containing protein 62	WDR62	WDR62;DKFZp434J046	ATQCLVKSPEVK	S1123	1xCarbamidomethyl [C4]; 1xPhospho [S8]	0	0	0	0	0	0	0	1.15865e+06	0	0	0	0	0	0	0	0	0	0	0	937188	0	0	0	0	0	1.38209e+06	3.79796e+06	3.29911e+06	0	0	855324	1.09827e+06	0	0	0	653369	0	0	0	0	0	0	0
Q6PJI9	GATOR complex protein WDR59	WDR59	WDR59	FGSLTYSDPR	S830	1xPhospho [S3]	3.83301e+06	0	4.44211e+06	0	0	0	2.33542e+06	3.25168e+06	2.52401e+06	2.20578e+06	2.84106e+06	5.15442e+06	1.89994e+06	0	0	2.30267e+06	2.67968e+06	0	0	2.59695e+06	1.76159e+06	0	1.09264e+06	942812	1.32622e+06	772633	2.92853e+06	0	3.56757e+06	0	0	0	0	0	0	3.16577e+06	0	1.24376e+06	2.51703e+06	1.61297e+06	2.46098e+06	0	1.4913e+06
Q9H6Y2	WD repeat-containing protein 55	WDR55	WDR55	TCEERPAEDGSDEEDPDSMEAPTR	S14	1xCarbamidomethyl [C2]; 1xPhospho [S11]	2.77609e+07	3.88178e+07	1.79769e+07	1.29572e+07	1.38707e+07	5.56642e+06	2.05433e+07	1.44083e+07	9.10447e+06	1.52167e+07	2.36651e+07	5.35868e+06	8.82858e+06	0	2.87086e+07	2.5393e+07	1.15249e+07	1.40631e+07	7.73863e+06	3.66618e+07	7.72883e+06	4.06114e+07	4.33542e+07	2.10009e+07	1.32009e+07	1.90158e+07	2.16069e+07	4.52397e+06	2.03375e+07	1.28605e+07	3.79514e+07	2.51566e+07	0	0	0	1.00593e+07	1.60147e+07	2.90346e+07	1.99118e+07	3.87548e+07	1.3966e+07	8.73907e+07	1.63808e+07
Q9H6Y2	WD repeat-containing protein 55	WDR55	WDR55	TCEERPAEDGSDEEDPDSMEAPTR	S14	1xCarbamidomethyl [C2]; 1xPhospho [S11]; 1xOxidation [M19]	4.65826e+07	5.21117e+07	80865795	4.85888e+07	1.0139e+08	8.35361e+07	5.84365e+07	8.25621e+07	5.13214e+07	6.15569e+07	1.75017e+08	2.2683e+07	6.58114e+07	2.38204e+07	2.84678e+07	5.30629e+07	4.96831e+07	4.49942e+07	2.22218e+07	1.47079e+08	2.93071e+07	7.27317e+07	1.05152e+08	6.17661e+07	3.22385e+07	1.06185e+08	5.88881e+07	5.76663e+07	3.93889e+07	3.44925e+07	8.09439e+07	6.34463e+07	1.20739e+07	4.35804e+07	7.80994e+07	6.1083e+07	2.03218e+07	3.85668e+07	6.06364e+07	1.02125e+08	1.42815e+08	2.02861e+08	1.2065e+08
A0MNP0	CDW9/WDR51B	WDR51B	WDR51B;POC1B	KKTEDMSDLPCESQR	T410	1xCarbamidomethyl [C11]; 1xPhospho [T3]; 1xOxidation [M6]	0	0	0	0	0	0	0	0	0	0	586529	0	0	0	0	0	0	0	0	0	0	0	0	0	0	0	0	0	783589	0	0	0	0	0	0	0	0	0	0	0	0	0	0
P61964	WD repeat-containing protein 5	WDR5	WDR5	AQPTPSSSATQSKPTPVKPNYALK	T18	1xPhospho [T4]	0	0	5.26343e+06	0	0	3.63469e+06	1.84382e+06	0	0	0	3.60998e+06	0	0	0	0	0	0	0	0	0	0	0	0	0	0	0	0	1.85093e+06	0	0	0	0	0	0	0	0	0	0	0	0	0	0	2.47283e+06
O94967	WD repeat-containing protein 47	WDR47	WDR47	SLNPALDGLTCGLTSHDKR	S312	1xCarbamidomethyl [C11]; 1xPhospho [S1]	0	0	457698	0	438425	1.21296e+06	0	0	0	0	0	859776	0	0	0	0	0	0	0	0	0	0	0	0	0	0	0	0	0	0	0	0	0	0	0	0	0	0	0	0	0	0	514310
O94967	WD repeat-containing protein 47	WDR47	WDR47	RPQSADAYMTR	S304	1xPhospho [S4]	0	0	0	0	0	863240	0	2.25961e+06	911357	4.71445e+06	980073	0	0	4.80117e+06	0	3.73125e+06	9.64671e+06	1.52876e+06	3.85385e+06	2.6824e+06	2.52213e+06	0	3.50019e+06	767083	5.37995e+06	0	1.5824e+06	6.17922e+06	4.43299e+06	2.752e+06	0	2.84832e+06	0	0	2.33557e+06	0	0	0	0	0	7.22364e+06	1.77591e+07	0
Q5JSH3	WD repeat-containing protein 44	WDR44	DKFZp761M142;WDR44	RKSELEFETLK	S262	1xPhospho [S3]	7.27011e+07	3.44062e+07	46466974	5.56176e+07	3.5867e+07	2.16912e+07	3.08996e+07	7.51281e+07	4.75026e+07	5.13689e+07	6.46062e+07	3.83636e+07	6.11055e+07	5.44444e+07	2.24638e+07	4.5391e+07	4.21883e+07	5.52597e+07	3.1685e+07	3.5784e+07	4.6303e+07	8.8259e+06	4.523e+07	4.92481e+07	4.40344e+07	4.05563e+07	4.98342e+07	6.37082e+07	5.16014e+07	3.8761e+07	2.42529e+07	2.55522e+07	6.03763e+07	2.82863e+07	4.943e+07	1.10777e+08	9.07499e+07	4.25492e+07	2.9096e+07	5.02115e+07	8.18004e+07	7.36157e+07	77570523
Q5JSH3	WD repeat-containing protein 44	WDR44	DKFZp761M142;WDR44	VGNESPVQELK	S50	1xPhospho [S5]	1.35694e+08	2.0901e+08	1.64592e+08	2.61402e+08	121976256	1.85999e+08	1.09969e+08	1.53499e+08	160453455	1.93583e+08	1.31273e+08	1.00785e+08	1.35186e+08	1.56379e+08	1.33985e+08	1.28493e+08	117489559	1.46257e+08	1.26917e+08	1.1079e+08	1.16482e+08	2.26696e+08	1.26868e+08	1.55537e+08	118173117	2.28274e+08	1.95651e+08	1.27912e+08	1.24737e+08	1.97624e+08	2.93453e+08	1.41638e+08	2.36716e+08	1.85735e+08	1.63409e+08	5.46441e+08	1.95567e+08	1.41575e+08	144153384	1.07284e+08	1.44806e+08	158261898	9.73775e+07
Q5JSH3	WD repeat-containing protein 44	WDR44	DKFZp761M142;WDR44	TKEYVSNDAAQSDDEEK	S403	1xPhospho [S12]	2.73973e+06	0	0	4.61419e+06	0	0	1.72782e+06	0	0	0	3.1309e+06	0	4.30894e+06	0	0	0	0	0	0	0	0	0	0	0	0	0	0	1.16612e+06	0	0	0	0	0	0	0	2.90873e+06	1.63971e+06	0	0	0	0	0	1.90956e+06
Q5JSH3	WD repeat-containing protein 44	WDR44	DKFZp761M142;WDR44	VSPSPSQESLSSSKSDTDTGVCSGTDEDPDDKNAPFR	S571	1xCarbamidomethyl [C22]; 1xPhospho [S12]	0	2.41733e+06	0	0	0	0	0	0	0	0	0	0	0	0	0	8.88006e+06	0	0	2.45748e+06	0	0	0	1.62749e+06	1.1083e+06	0	0	0	0	0	0	1.3305e+06	0	0	0	0	3.06544e+06	0	0	0	0	0	0	0
Q5JSH3	WD repeat-containing protein 44	WDR44	DKFZp761M142;WDR44	YNTEGRVSPSPSQESLSSSK	S563	2xPhospho [S]	0	2.11407e+06	0	2.26061e+06	3.19893e+06	0	2.00152e+06	5.34277e+06	3.15051e+06	0	1.69915e+06	0	0	0	791005	0	0	0	3.35623e+06	4.06152e+06	1.51655e+06	6.19169e+06	0	5.06455e+06	647599	9.62965e+06	4.94369e+06	2.37361e+06	1.31367e+06	1.81725e+06	1.11592e+07	7.62799e+06	0	5.30267e+06	1.18452e+06	7.75353e+06	3.45961e+06	0	2.66827e+06	5.20223e+06	0	4.15509e+06	0
Q5JSH3	WD repeat-containing protein 44	WDR44	DKFZp761M142;WDR44	KSELEFETLK	S262	1xPhospho [S2]	0	2.45452e+06	1.94549e+06	2.59842e+06	0	0	1.6049e+06	3.85574e+06	1.60829e+06	2.50715e+06	0	0	0	0	0	0	2.19229e+06	1.70736e+06	0	1.7728e+06	2.33e+06	1.52879e+06	1.77862e+06	2.67961e+06	2.70507e+06	1.26032e+06	1.68007e+06	2.3085e+06	1.9889e+06	0	0	0	0	3.3194e+06	0	4.97574e+06	3.62382e+06	1.40641e+06	795343	0	2.92252e+06	4.68021e+06	3.20011e+06
Q5JSH3	WD repeat-containing protein 44	WDR44	DKFZp761M142;WDR44	VLQLEDDSLDSK	S81	1xPhospho [S8]	1.9411e+06	1.50452e+06	3.03329e+06	2.36459e+06	1.21699e+06	663456	1.01321e+06	2.38986e+06	1.4335e+06	0	1.53617e+06	1.71386e+06	1.14186e+06	0	901852	1.20776e+06	1.9891e+06	1.85058e+06	1.35245e+06	2.17142e+06	839957	1.88197e+06	1.40251e+06	1.85965e+06	1.5925e+06	3.81894e+06	4.42536e+06	3.41211e+06	1.94537e+06	1.15443e+06	7.67987e+06	2.03145e+06	0	0	1.47351e+06	627006	0	0	1.82888e+06	1.19567e+06	1.40571e+06	0	1.06967e+06
Q5JSH3	WD repeat-containing protein 44	WDR44	DKFZp761M142;WDR44	IIESIIEESQK	S66	1xPhospho [S4]	0	0	0	434640	0	0	0	0	0	0	0	0	0	0	0	0	0	0	0	0	0	0	0	0	0	0	0	0	0	0	0	0	0	0	0	0	517545	0	0	0	0	0	501823
Q5JSH3	WD repeat-containing protein 44	WDR44	DKFZp761M142;WDR44	SELEFETLK	S262	1xPhospho [S1]	0	0	0	0	0	0	0	1.02778e+06	0	0	0	0	0	0	0	0	0	0	0	0	0	0	0	0	0	0	0	1.16833e+06	0	0	0	0	0	0	0	1.95768e+06	0	0	0	0	0	0	1.03727e+06
Q5JSH3	WD repeat-containing protein 44	WDR44	DKFZp761M142;WDR44	VGNESPVQELKQDVSK	S50	1xPhospho [S5]	0	0	0	0	0	0	0	0	0	0	0	0	0	0	1.02655e+06	0	0	0	0	0	0	2.74981e+06	0	0	0	0	0	888089	0	0	0	0	0	0	0	0	0	0	2.45686e+06	0	0	0	0
Q5JSH3	WD repeat-containing protein 44	WDR44	DKFZp761M142;WDR44	SVRDEVFHTDQDDPSSSDDEGMPYTRPVK	S470	2xPhospho [S15; S16]	0	0	0	0	0	0	0	0	1.96752e+06	0	0	0	0	0	0	0	1.58947e+06	0	1.10664e+06	675405	0	0	0	0	0	1.02425e+06	749589	0	0	0	1.23938e+06	0	605511	2.04449e+06	1.01475e+06	1.37832e+06	0	0	1.3527e+06	0	0	0	623588
Q5JSH3	WD repeat-containing protein 44	WDR44	DKFZp761M142;WDR44	SVRDEVFHTDQDDPSSSDDEGMPYTRPVK	S471	2xPhospho [S15; S16]	0	0	0	0	0	0	0	0	1.96752e+06	0	0	0	0	0	0	0	1.58947e+06	0	1.10664e+06	675405	0	0	0	0	0	1.02425e+06	749589	0	0	0	1.23938e+06	0	605511	2.04449e+06	1.01475e+06	1.37832e+06	0	0	1.3527e+06	0	0	0	623588
Q15061	WD repeat-containing protein 43	WDR43	WDR43	VRTPVMNSEAK	T394	1xPhospho [T3]; 1xOxidation [M6]	0	0	0	0	0	0	2.70763e+06	0	0	0	2.22749e+06	0	0	0	0	0	0	0	0	0	0	0	0	0	0	0	0	0	0	0	2.36178e+06	3.7558e+06	0	0	0	0	0	0	2.12567e+06	2.32547e+06	3.12058e+06	0	0
P57081	tRNA (guanine-N(7)-)-methyltransferase non-catalytic subunit WDR4	WDR4	WDR4	MRPGEATLSC	S411	1xCarbamidomethyl [C10]; 1xPhospho [S9]	0	0	0	0	0	0	615268	579276	0	0	0	0	0	0	0	0	0	0	0	1.63613e+06	0	0	0	0	0	4.44372e+06	859347	1.31411e+06	0	0	1.96316e+06	0	0	0	0	970363	0	1.15506e+06	0	0	0	0	1.53286e+06
Q9Y2I8	WD repeat-containing protein 37	WDR37	WDR37	LAAEGQAIDGAELSKGQLK	S103	1xPhospho [S14]	0	0	0	819463	0	0	0	935758	0	0	853976	0	0	0	0	921182	0	0	0	890689	860738	0	0	0	0	0	0	503134	893452	0	0	0	0	0	0	0	0	0	0	0	0	0	0
Q9C0J8	pre-mRNA 3 end processing protein WDR33	WDR33	WDR33	DTPRPDHPPHDGHSPASR	S1210	1xPhospho [S14]	9.77018e+06	2.65543e+07	4.7833e+06	1.44096e+07	7.19174e+06	1.05737e+07	9.58283e+06	65679.7	0	4.84955e+06	1.06147e+07	0	9.276e+06	0	8.62833e+06	5.29204e+06	4.85511e+06	3.8743e+06	2.72696e+06	1.14605e+07	1.25909e+06	1.29538e+07	8.10807e+06	2.08124e+06	0	4.12636e+06	0	67106.1	6.7224e+06	1.31708e+06	9.51929e+06	6.98343e+06	941535	0	5.94503e+06	87455.3	2.32588e+07	1.45721e+07	1.1127e+07	3.50867e+06	0	0	3.15404e+06
Q9C0J8	pre-mRNA 3 end processing protein WDR33	WDR33	WDR33	TPLLGDGPR	T907	1xPhospho [T1]	0	0	1.77471e+06	0	0	0	0	0	0	2.77109e+06	847085	0	4.41987e+06	0	0	0	0	0	0	0	0	1.55402e+06	0	0	0	0	0	426412	0	0	0	0	0	0	620327	1.42884e+06	1.77384e+06	0	0	0	0	2.66012e+06	0
Q9C0J8	pre-mRNA 3 end processing protein WDR33	WDR33	WDR33	GLLPTPDEFPR	T1166	1xPhospho [T5]	0	0	0	0	0	0	0	0	0	0	0	0	0	0	0	0	0	0	0	0	0	0	0	0	0	0	0	0	0	0	0	0	0	0	0	0	0	0	0	0	0	0	0
A0A499FIZ0	WD repeat-containing protein 26	WDR26	WDR26	ASAAEGVGEPGASAGR	S34	1xPhospho [S2]	8.73184e+06	6.65139e+06	5.20397e+06	4.52041e+06	4.97972e+06	1.45847e+07	8.09276e+06	6.96514e+06	6.25951e+06	4.60576e+06	6.36542e+06	4.05836e+06	4.70411e+06	0	2.90619e+06	1.28002e+07	9.29799e+06	0	3.77208e+06	3.36319e+06	4.28318e+06	0	969496	3.94419e+06	7.01949e+06	0	3.5623e+06	0	1.30338e+06	5.67206e+06	916295	0	0	0	5.18749e+06	1.09578e+07	0	707037	0	6.40122e+06	4.23868e+06	1.29937e+07	1.15893e+07
A0A3B3ISA1	GATOR complex protein WDR24	WDR24	WDR24	HEIVDTPPGPEHLQDK	T655	1xPhospho [T6]	5.53634e+06	4.96154e+06	6.01807e+06	7.02655e+06	3.4976e+06	2.7463e+06	3.97707e+06	8.1773e+06	4.60758e+06	5.19646e+06	5.47406e+06	9.37221e+06	5.32775e+06	2.49673e+07	4.33445e+06	8.3117e+06	2.8888e+06	2.57767e+06	4.7075e+06	3.32029e+06	4.11827e+06	1.63744e+06	8.12301e+06	6.78216e+06	9.44901e+06	5.96656e+06	4.77641e+06	5.89817e+06	7.36297e+06	5.84414e+06	6.70633e+06	5.96009e+06	2.81477e+07	1.05213e+07	3.09809e+06	7.49471e+06	4.46958e+06	2.78033e+06	2.6115e+06	6.21489e+06	4.93313e+06	3.70678e+06	7.67589e+06
A0A3B3ISA1	GATOR complex protein WDR24	WDR24	WDR24	IIYCSPGLVPTANLNHSVGK	S544	1xCarbamidomethyl [C4]; 1xPhospho [S17]	0	0	1.22029e+06	0	0	3.23757e+06	2.86874e+06	0	0	0	0	0	0	0	764577	0	0	0	0	0	4.00236e+06	0	0	1.97047e+06	0	0	0	0	0	0	0	0	0	0	0	0	0	0	2.36645e+06	0	0	0	322285
A0A3B3ISA1	GATOR complex protein WDR24	WDR24	WDR24	DMAPGLGSETR	S570	1xPhospho [S8]; 1xOxidation [M2]	1.14972e+07	2.00018e+06	7.15283e+06	2.76033e+06	0	1.83432e+06	1.48857e+06	822955	3.98675e+06	0	0	0	5.68062e+06	0	0	0	0	0	0	0	3.96613e+06	1.15298e+06	1.24165e+06	3.29484e+06	0	4.60888e+06	0	578676	2.10636e+06	2.13242e+06	1.96368e+06	3.50216e+06	0	0	1.81436e+06	0	1.49431e+06	1.07994e+06	1.71301e+06	1.47945e+06	4.68634e+06	0	6.01125e+06
A0A3B3ISA1	GATOR complex protein WDR24	WDR24	WDR24	DMAPGLGSETRLDR	S570	1xPhospho [S8]; 1xOxidation [M2]	0	818613	3.66193e+06	2.48788e+06	3.14407e+06	1.50433e+06	2.1599e+06	895715	2.50019e+06	0	1.35407e+06	0	4.76929e+06	2.80386e+06	1.5928e+06	1.18121e+06	832240	1.88518e+06	0	2.53893e+06	3.30581e+06	1.78955e+06	857741	3.09616e+06	0	1.44891e+06	1.97586e+06	0	833913	4.64239e+06	0	3.22399e+06	0	1.57373e+06	5.18707e+06	0	0	0	3.35526e+06	0	5.63322e+06	0	904619
Q8TBZ3	WD repeat-containing protein 20	WDR20	DKFZp686P0251;WDR20	SNSLPHSAVSNAGSK	S434	1xPhospho [S3]	4.89379e+07	3.31402e+07	2.06636e+07	5.23543e+07	4.80784e+07	5.25726e+07	5.03104e+07	3.87591e+07	2.3145e+07	3.45272e+07	5.09806e+07	4.73144e+07	6.13877e+07	5.29482e+07	4.47783e+07	2.54146e+07	5.95612e+07	4.09158e+07	4.41746e+07	5.60579e+07	5.93066e+07	6.84594e+07	5.69362e+07	7.08879e+07	5.10728e+07	3.16541e+07	4.44303e+07	8.06075e+07	4.43645e+07	3.49632e+07	2.68325e+07	3.61738e+07	1.5539e+07	3.979e+07	2.81739e+07	3.75689e+07	4.84131e+07	7.11761e+07	3.17399e+07	1.63128e+07	2.44275e+07	5.26138e+07	2.93847e+07
Q8TBZ3	WD repeat-containing protein 20	WDR20	DKFZp686P0251;WDR20	RNSTDSRPVSVTYR	S357	2xPhospho [S3; S6]	1.38681e+07	9.85813e+06	8.91962e+06	1.25114e+07	1.44699e+07	3.6619e+06	17341722	1.19571e+07	3.06417e+06	1.02394e+07	1.27571e+07	1.22868e+07	15032047	3.77889e+06	7.31111e+06	8.50069e+06	9.56636e+06	9.09142e+06	3.37612e+06	8.03647e+06	4.43903e+06	7.88341e+06	5.1204e+06	4.63853e+06	7.2057e+06	6.733e+06	6.99665e+06	9.97011e+06	3.93175e+06	4.48248e+06	2.54025e+06	6.8449e+06	0	7.75558e+06	4.94773e+06	1.20774e+06	3.0447e+06	4.93126e+06	6.79061e+06	8.70494e+06	1.0236e+07	1.23114e+07	9.46741e+06
Q8TBZ3	WD repeat-containing protein 20	WDR20	DKFZp686P0251;WDR20	RNSTDSRPVSVTYR	S360	2xPhospho [S3; S6]	1.38681e+07	9.85813e+06	8.91962e+06	1.25114e+07	1.44699e+07	3.6619e+06	17341722	1.19571e+07	3.06417e+06	1.02394e+07	1.27571e+07	1.22868e+07	15032047	3.77889e+06	7.31111e+06	8.50069e+06	9.56636e+06	9.09142e+06	3.37612e+06	8.03647e+06	4.43903e+06	7.88341e+06	5.1204e+06	4.63853e+06	7.2057e+06	6.733e+06	6.99665e+06	9.97011e+06	3.93175e+06	4.48248e+06	2.54025e+06	6.8449e+06	0	7.75558e+06	4.94773e+06	1.20774e+06	3.0447e+06	4.93126e+06	6.79061e+06	8.70494e+06	1.0236e+07	1.23114e+07	9.46741e+06
Q8TBZ3	WD repeat-containing protein 20	WDR20	DKFZp686P0251;WDR20	SSVMDGAIASGVSK	S448	1xPhospho [S2]	0	0	0	0	0	0	0	0	0	0	592442	0	0	0	0	0	0	0	0	0	547949	0	0	0	0	0	0	0	0	0	0	0	0	0	0	2.12471e+06	0	0	476488	0	0	0	441463
Q9H1Z4	WD repeat-containing protein 13	WDR13	WDR13	SVSRGSYQLQAQMNR	S113	2xPhospho [S3; S]	0	0	0	0	0	0	1.44556e+06	0	0	0	1.78589e+06	0	0	0	1.1304e+06	0	0	0	0	0	1.78769e+06	0	940084	0	0	0	2.31835e+06	3.9034e+06	0	0	0	0	0	0	0	0	1.22631e+06	0	1.42724e+06	0	0	0	0
Q9H1Z4	WD repeat-containing protein 13	WDR13	WDR13	SVSRGSYQLQAQMNR	S113	2xPhospho [S/Y]; 1xOxidation [M13]	8.60925e+06	7.98698e+06	1.39303e+07	1.1018e+07	1.61433e+07	1.62683e+07	1.09523e+07	1.38063e+07	7.14677e+06	1.71435e+07	1.1397e+07	5.47797e+06	2.42571e+06	1.17691e+07	1.33763e+07	2.22867e+07	1.53529e+07	1.35486e+07	1.18682e+07	9.8994e+06	1.1687e+07	0	1.34764e+07	2.30236e+07	1.25293e+07	8.7778e+06	1.09938e+07	3.89382e+06	8.38091e+06	2.09754e+07	6.60245e+06	1.29131e+07	2.42473e+07	0	0	6.3046e+06	4.81278e+06	2.13348e+07	1.1057e+07	3.27818e+06	6.90037e+06	8.41005e+06	9.35107e+06
Q9H1Z4	WD repeat-containing protein 13	WDR13	WDR13	YGPLSEPGSAR	S70	2xPhospho [S5; S9]	2.73439e+06	592011	961370	1.94931e+06	1.52736e+06	0	3.18145e+06	2.0108e+06	0	0	1.63222e+06	0	0	0	0	1.45468e+06	2.43733e+06	3.54067e+06	1.17842e+06	1.41977e+06	0	0	0	0	719071	965307	0	4.76393e+06	0	0	1.23674e+06	0	0	0	0	0	2.2561e+06	0	519376	1518334	1.89523e+06	5.37087e+06	2.01361e+06
Q9H1Z4	WD repeat-containing protein 13	WDR13	WDR13	YGPLSEPGSAR	S74	2xPhospho [S5; S9]	2.73439e+06	592011	961370	1.94931e+06	1.52736e+06	0	3.18145e+06	2.0108e+06	0	0	1.63222e+06	0	0	0	0	1.45468e+06	2.43733e+06	3.54067e+06	1.17842e+06	1.41977e+06	0	0	0	0	719071	965307	0	4.76393e+06	0	0	1.23674e+06	0	0	0	0	0	2.2561e+06	0	519376	1518334	1.89523e+06	5.37087e+06	2.01361e+06
O75717	WD repeat and HMG-box DNA-binding protein 1	WDHD1	WDHD1	SHILEDDENSVDISMLK	S383	1xPhospho [S10]	203108	2.30591e+06	782452	0	198437	4.48931e+06	0	5.44083e+06	0	0	1.80954e+06	0	115576	0	0	124164	0	212487	0	0	729935	294585	70443.8	1.23511e+06	0	0	27041.2	3.97327e+07	5.08187e+06	167449	281647	64911.4	0	0	0	1.98736e+06	2802152	200011	0	0	8.54325e+06	0	4.44338e+06
O75717	WD repeat and HMG-box DNA-binding protein 1	WDHD1	WDHD1	SHILEDDENSVDISMLK	S383	1xPhospho [S10]; 1xOxidation [M15]	0	1.84075e+06	0	0	0	0	0	7.12684e+06	0	274056	2.8206e+06	0	0	0	0	904322	0	0	0	3.7052e+06	1.19243e+06	0	0	3.0859e+06	0	0	829592	2.88411e+07	4.31197e+06	0	6.61409e+06	2.07092e+06	0	0	0	0	1.56874e+06	0	0	0	6.84193e+06	0	5.30092e+06
O75717	WD repeat and HMG-box DNA-binding protein 1	WDHD1	WDHD1	NQVEEDAEDSGEADDEEKPEIHKPGQNSFSK	S868	1xPhospho [S10]	5.74408e+06	0	0	1.61141e+06	0	0	0	8.67159e+06	4.62597e+06	6.07917e+06	8.3375e+06	5.26401e+06	3.09136e+06	0	1.36104e+06	1.76422e+06	5.04195e+06	4.66365e+06	0	1.41244e+07	0	0	9.35419e+06	1.75335e+07	3.25337e+06	1.40776e+07	5.73844e+06	2.00523e+08	2.23347e+07	4.67435e+06	1.25025e+07	5.00713e+07	0	1.20958e+07	0	1.06221e+07	2.28725e+06	3.15865e+06	0	0	8.41026e+06	0	9.45039e+06
O75717	WD repeat and HMG-box DNA-binding protein 1	WDHD1	WDHD1	QRSHILEDDENSVDISMLK	S374	1xPhospho [S3]	2.3521e+06	0	0	642299	0	0	605870	0	0	0	0	0	0	0	1.18005e+06	0	0	1.41554e+06	0	0	722481	0	1.28029e+06	1.00633e+06	0	0	407267	5.60242e+06	1.12527e+06	1.53922e+06	0	588840	0	0	469027	0	0	485587	353481	0	0	0	0
O75717	WD repeat and HMG-box DNA-binding protein 1	WDHD1	WDHD1	QRSHILEDDENSVDISMLK	S374	2xPhospho [S3; S12]	0	0	0	0	0	0	0	0	0	0	0	0	0	0	0	0	0	0	0	0	0	0	0	0	0	0	0	2.36398e+06	0	0	0	0	0	0	0	0	0	0	0	0	0	0	0
O75717	WD repeat and HMG-box DNA-binding protein 1	WDHD1	WDHD1	QRSHILEDDENSVDISMLK	S383	2xPhospho [S3; S12]	0	0	0	0	0	0	0	0	0	0	0	0	0	0	0	0	0	0	0	0	0	0	0	0	0	0	0	2.36398e+06	0	0	0	0	0	0	0	0	0	0	0	0	0	0	0
O75717	WD repeat and HMG-box DNA-binding protein 1	WDHD1	WDHD1	FRNQVEEDAEDSGEADDEEKPEIHKPGQNSFSK	S868	1xPhospho [S12]	0	0	0	0	4.35837e+06	0	0	0	0	1.11909e+07	0	0	0	0	0	2.2789e+06	4.11735e+06	0	0	0	0	0	3.66551e+06	0	0	0	0	3.23343e+06	0	0	0	0	0	0	1.74048e+06	0	0	5.99514e+06	838731	0	0	0	0
O75717	WD repeat and HMG-box DNA-binding protein 1	WDHD1	WDHD1	TGSSLLKEEEEDGQEGSIHNLPLVTSQRPFYDGPMPTPR	S407	1xPhospho [S17]	0	0	0	0	0	0	0	0	0	0	0	0	0	0	0	0	0	0	0	0	0	0	0	0	0	0	0	9.17671e+06	0	0	0	0	0	0	0	0	0	0	0	0	0	0	0
O75717	WD repeat and HMG-box DNA-binding protein 1	WDHD1	WDHD1	VEKDYNDLFDGDDMSNAGDFLNDNAVEIPSFSK	S333	1xPhospho [S15]	385491	0	168149	0	0	0	0	93681.5	0	0	0	0	0	0	0	0	0	0	0	0	0	0	0	95661.8	0	0	0	1.11177e+06	0	0	0	0	0	0	0	0	0	284468	0	0	0	0	0
O75717	WD repeat and HMG-box DNA-binding protein 1	WDHD1	WDHD1	TGSSLLKEEEEDGQEGSIHNLPLVTSQRPFYDGPMPTPR	S407	1xPhospho [S17]; 1xOxidation [M35]	0	0	0	0	0	0	0	0	520391	0	0	0	0	0	0	0	0	0	0	0	0	0	0	0	0	0	0	5.63771e+06	0	251065	0	0	0	0	0	0	0	0	0	0	0	0	0
Q6ZS81	WD repeat- and FYVE domain-containing protein 4	WDFY4	WDFY4;hCG_1745555	MSVPGRPAGEEPPAQPPSPR	S3123	1xPhospho [S18]; 1xOxidation [M1]	0	0	0	0	1.24536e+06	0	0	2.68147e+06	3.66906e+06	0	2.09559e+06	0	0	0	1.21421e+06	1.34538e+06	2.35266e+06	1.57198e+06	1.50066e+06	1.31743e+06	2.48049e+06	0	0	943914	5.02922e+06	0	3.33994e+06	2.42574e+06	7.67521e+06	2.04023e+06	1.00014e+06	1.33911e+06	3.59034e+06	5.39877e+06	8.07483e+06	0	3.40631e+06	0	4.45579e+06	1.98418e+06	9.20288e+06	0	0
Q6ZS81	WD repeat- and FYVE domain-containing protein 4	WDFY4	WDFY4;hCG_1745555	MSVPGRPAGEEPPAQPPSPR	S3123	1xPhospho [S18]	0	0	2.40142e+06	0	0	0	0	1.20178e+06	0	0	1.13006e+06	0	1.3314e+06	0	0	1.40974e+06	0	0	0	971958	3.26877e+06	0	0	0	3.5319e+06	0	3.29339e+06	4.52225e+06	1.11639e+07	0	1.07944e+06	0	0	4.91797e+06	8.28259e+06	0	2.93869e+06	1.76358e+06	4.47124e+06	0	4.4645e+06	0	0
A0A024RDC2	WD repeat and FYVE domain containing 3, isoform CRA_a	WDFY3	WDF3;WDFY3	SRSAPDGGDEENQEQLQDQIAEGSSIEEEEKTDNATLLR	S2492	1xPhospho [S3]	0	8.38955e+06	0	0	6.81424e+06	2.344e+07	1.77814e+07	1.83764e+07	4.12915e+06	1.35002e+06	1.66994e+07	0	3.18344e+06	1.17492e+06	1.13598e+07	1.37743e+06	2.82013e+06	9.13334e+06	288501	4.49553e+06	1.66007e+07	3.69116e+06	1.27507e+07	5.779e+06	1.56167e+07	2.99057e+07	1.48425e+07	7.96528e+06	1.15141e+07	3.79168e+06	1.45663e+07	6.50514e+06	3.25032e+06	5.79766e+06	1.73854e+07	1.77746e+07	1.24156e+07	1.10347e+06	1.95636e+07	1.90656e+07	1.8015e+07	1.77295e+07	1.45415e+07
A0A024RDC2	WD repeat and FYVE domain containing 3, isoform CRA_a	WDFY3	WDF3;WDFY3	RWSDQLSLDEK	S3335	1xPhospho [S3]	0	0	0	0	0	0	0	0	0	0	0	3.5952e+06	5.31702e+06	0	0	8.56054e+06	0	0	0	5.29868e+06	4.75573e+06	0	7.348e+06	4.76921e+06	5.92699e+06	5.91875e+06	6.90681e+06	5.31615e+06	6.3743e+06	0	7.14603e+06	5.30395e+06	0	5.24581e+06	6.01833e+06	7.4837e+06	5.53718e+06	0	0	4.86223e+06	6.54148e+06	6.58042e+06	4.03163e+06
A0A024RDC2	WD repeat and FYVE domain containing 3, isoform CRA_a	WDFY3	WDF3;WDFY3	SAPDGGDEENQEQLQDQIAEGSSIEEEEKTDNATLLR	S2492	1xPhospho [S1]	2.11529e+06	3.3214e+06	3.7548e+06	2.19361e+06	2.54476e+06	903563	0	5.89998e+06	0	690793	0	0	691827	0	1.73297e+06	1.01269e+06	1.71074e+06	694360	676329	52626.7	1.43053e+06	251015	251043	264372	1.14956e+06	663016	363053	1.31845e+06	648220	1.21985e+06	0	0	0	946823	1.22919e+06	0	0	240941	629094	255639	380961	227264	0
A0A024RDC2	WD repeat and FYVE domain containing 3, isoform CRA_a	WDFY3	WDF3;WDFY3	VSSGFGLSK	S2278	1xPhospho [S3]	2.28502e+07	1.08903e+07	1.95557e+07	6.95256e+06	1.50514e+07	1.37651e+07	1.41597e+07	2.19269e+07	1.39174e+07	2.14057e+07	1.84731e+07	2.30365e+07	1.98013e+07	2.3272e+07	8.65702e+06	6.45509e+06	1.08582e+07	7.68036e+06	8.38482e+06	8.22997e+06	2.06824e+07	0	4.94701e+06	1.40298e+07	4.67114e+06	1.20128e+07	1.16216e+07	1.0041e+07	2.0466e+07	9.86744e+06	6.62787e+06	4.39914e+06	1.90405e+07	1.67431e+07	8.20063e+06	2.13215e+07	9.11278e+06	4.57158e+06	1.95384e+07	2.50083e+07	3.29686e+07	6.28616e+06	2.08899e+07
A0A024RDC2	WD repeat and FYVE domain containing 3, isoform CRA_a	WDFY3	WDF3;WDFY3	WSDQLSLDEK	S3339	1xPhospho [S6]	0	0	1.67872e+06	0	0	0	1.04413e+06	2.80449e+06	0	0	1.38771e+06	0	1.01181e+06	0	0	2.36311e+06	1.45129e+06	951576	0	851898	0	0	1.12754e+06	2.67968e+06	1.00701e+06	3.25398e+06	1.21044e+06	0	0	871644	0	1.38342e+06	0	3.17403e+06	0	1.40882e+06	0	0	0	0	0	0	0
Q9NX94	WW domain binding protein 1-like	WBP1L	WBP1L	SSTRPPSIADPDPSDLPVDR	S173	1xPhospho [S7]	2.31797e+06	0	5.92646e+06	0	3.16658e+06	3.63658e+06	6.36107e+06	8.28794e+06	3.19151e+06	834213	3.76203e+06	7.33336e+06	5.22246e+06	644659	1.91156e+06	5.67899e+06	9.49311e+06	4.45566e+06	1.03183e+07	2.39897e+06	4.95307e+06	0	1.99692e+06	4.81507e+06	9.24868e+06	4.7734e+06	4.69246e+06	3.62513e+06	1.14372e+07	2.40176e+06	0	2.70548e+06	0	6.03336e+06	9.03175e+06	6.41755e+06	7.20165e+06	5.56084e+06	1.0645e+07	0	5.99308e+06	0	4.56361e+06
D3DPE6	Wiskott-Aldrich syndrome protein interacting protein, isoform CRA_a	WASPIP	WIPF1;WASPIP	ALDDKPPPPPPPVGNRPSIHR	S276	1xPhospho [S18]	3.42308e+07	1.69953e+07	3.32074e+07	1.39462e+07	1.68805e+07	1.51322e+07	2.24413e+07	2.38974e+07	9.88631e+06	1.05401e+07	2.18425e+07	2.07034e+07	5.23727e+06	1.76081e+07	6.74965e+06	1.1189e+07	1.52546e+07	6.07762e+06	5.63458e+06	1.01271e+07	1.04707e+07	4.01947e+06	5.51861e+06	7.48824e+06	4.8723e+06	3.93097e+06	1.70405e+07	1.40265e+07	1.73497e+07	1.24135e+07	1.16244e+07	5.18404e+06	3.18157e+07	1.23032e+07	2.08569e+07	2.6101e+07	1.64457e+07	1.89488e+07	1.84515e+07	5.65291e+06	2.3393e+06	2.50686e+07	1.80555e+07
D3DPE6	Wiskott-Aldrich syndrome protein interacting protein, isoform CRA_a	WASPIP	WIPF1;WASPIP	GTALGGGSIR	S234	1xPhospho [S8]	5.81678e+07	2.02004e+07	1.62702e+07	2.96452e+07	1.73082e+07	1.201e+07	2.15711e+07	2.51061e+07	2.18012e+07	1.52181e+07	1.86406e+07	2.09064e+07	0	1.79084e+07	7.32634e+06	1.18363e+07	3.26164e+07	1.59081e+07	9.04748e+06	8.67539e+06	1.09233e+07	2.76071e+06	4.09372e+06	5.82832e+06	6.79166e+06	2.07076e+06	1.10039e+07	1.33766e+07	8.62862e+06	1.4641e+07	3.87151e+06	2.62261e+06	3.37516e+07	5.22046e+06	2.32462e+07	3.03769e+07	3.20947e+07	1.28942e+07	7.44971e+06	0	2.40803e+06	3.57244e+06	3.62033e+06
D3DPE6	Wiskott-Aldrich syndrome protein interacting protein, isoform CRA_a	WASPIP	WIPF1;WASPIP	ALPATPQLPSR	T398	1xPhospho [T5]	7.52757e+06	840035	4.3698e+06	0	1.41941e+06	8.15624e+06	2.95836e+06	2.86356e+06	1.76796e+06	0	2.61127e+06	4.7168e+06	0	0	1.69377e+06	1.3714e+06	2.88201e+06	1.41348e+06	0	876088	1.48249e+06	0	0	681858	863739	1.0993e+06	4.34583e+06	2.90427e+06	3.0982e+06	3.9074e+06	0	563439	0	0	3.43332e+06	8.45539e+06	2.75626e+06	4.7548e+06	4.59557e+06	1.14387e+06	1.41486e+06	0	1.64749e+06
D3DPE6	Wiskott-Aldrich syndrome protein interacting protein, isoform CRA_a	WASPIP	WIPF1;WASPIP	GSPPVPGGPR	S203	1xPhospho [S2]	3.09185e+06	0	944955	1.94039e+06	0	0	1.35026e+06	4.29194e+06	1.98239e+06	0	2.19381e+06	0	0	0	0	1.93773e+06	1.57625e+06	2.65662e+06	1.50727e+06	2.15482e+06	978415	2.73775e+06	2.6336e+06	2.7066e+06	2.53753e+06	2.08828e+06	2.12867e+06	2.19483e+06	3.11817e+06	1.27836e+06	3.70846e+06	3.02786e+06	0	3.02134e+06	2.99399e+06	2.60532e+06	7.53631e+06	2.66726e+06	0	0	2.03913e+06	0	1.48438e+06
O00401	Neural Wiskott-Aldrich syndrome protein	WASL	DKFZp779G0847;WASL	VIYDFIEK	Y256	1xPhospho [Y3]	1.76548e+07	1.23681e+07	2.86067e+07	1.22893e+07	9.87756e+06	1.36698e+07	1.4795e+07	1.91889e+07	2.204e+07	0	1.89698e+07	2.41951e+07	0	0	2.48863e+07	136330	0	1.81802e+07	0	1.67902e+07	6.53721e+06	1.02529e+07	1.839e+07	1.47171e+07	1.22732e+07	2.57906e+07	3.8033e+07	1.57244e+07	1.37959e+07	113541	5.34604e+07	2.3054e+07	0	7.03174e+06	1.80027e+07	4.37248e+07	1.87198e+07	2.94761e+07	2.08661e+07	7.12378e+06	1.37922e+07	0	2.33015e+07
J3KP36	WASH complex subunit 2C	WASHC2C	DKFZp434O171;WASHC2A;WASHC2C;FAM21A;FAM21B	SRPTSFADELAAR	S228	2xPhospho [S1; S5]	1.57547e+07	1.85871e+07	1.64416e+07	1.93198e+07	1.24213e+07	1.32175e+07	29481685	3.65258e+07	1.13973e+07	0	2.07224e+07	1.66239e+07	0	0	1.24211e+07	0	0	2.17806e+07	0	2.83818e+07	8.24779e+06	2.04996e+06	8.40783e+06	7.07796e+06	1.16559e+07	7.59709e+06	2.1689e+07	1.72351e+07	1.53004e+07	1.16092e+07	7.05185e+06	5.69497e+06	0	1.04719e+07	1.95462e+07	3.29894e+07	4.11644e+07	9.5226e+06	1.03422e+07	1.65629e+07	1.99712e+07	0	1.07021e+07
J3KP36	WASH complex subunit 2C	WASHC2C	DKFZp434O171;WASHC2A;WASHC2C;FAM21A;FAM21B	SRPTSFADELAAR	S232	2xPhospho [S1; S5]	1.57547e+07	1.85871e+07	1.64416e+07	1.93198e+07	1.24213e+07	1.32175e+07	29481685	3.65258e+07	1.13973e+07	0	2.07224e+07	1.66239e+07	0	0	1.24211e+07	0	0	2.17806e+07	0	2.83818e+07	8.24779e+06	2.04996e+06	8.40783e+06	7.07796e+06	1.16559e+07	7.59709e+06	2.1689e+07	1.72351e+07	1.53004e+07	1.16092e+07	7.05185e+06	5.69497e+06	0	1.04719e+07	1.95462e+07	3.29894e+07	4.11644e+07	9.5226e+06	1.03422e+07	1.65629e+07	1.99712e+07	0	1.07021e+07
J3KP36	WASH complex subunit 2C	WASHC2C	DKFZp434O171;WASHC2A;WASHC2C;FAM21A;FAM21B	RTPSDDEEDNLFAPPK	T275	2xPhospho [T2; S4]	5.33927e+06	7.21712e+06	4.74409e+06	8.05924e+06	2.32374e+06	0	9.40663e+06	1.11056e+07	3.9046e+06	0	4.51715e+06	0	0	0	4.5698e+06	1.91754e+06	1.14815e+06	9.88809e+06	0	8.44594e+06	0	391161	5.81013e+06	5.22307e+06	4.604e+06	4.68576e+06	5.6206e+06	8.72287e+06	5.27085e+06	1.55873e+06	9.40749e+06	1.02395e+07	0	1.0656e+06	1.35503e+07	7.35813e+06	1.09724e+07	7.48547e+06	1.58083e+06	4.69881e+06	0	0	4.77129e+06
J3KP36	WASH complex subunit 2C	WASHC2C	DKFZp434O171;WASHC2A;WASHC2C;FAM21A;FAM21B	RTPSDDEEDNLFAPPK	S277	2xPhospho [T2; S4]	5.33927e+06	7.21712e+06	4.74409e+06	8.05924e+06	2.32374e+06	0	9.40663e+06	1.11056e+07	3.9046e+06	0	4.51715e+06	0	0	0	4.5698e+06	1.91754e+06	1.14815e+06	9.88809e+06	0	8.44594e+06	0	391161	5.81013e+06	5.22307e+06	4.604e+06	4.68576e+06	5.6206e+06	8.72287e+06	5.27085e+06	1.55873e+06	9.40749e+06	1.02395e+07	0	1.0656e+06	1.35503e+07	7.35813e+06	1.09724e+07	7.48547e+06	1.58083e+06	4.69881e+06	0	0	4.77129e+06
J3KP36	WASH complex subunit 2C	WASHC2C	DKFZp434O171;WASHC2A;WASHC2C;FAM21A;FAM21B	AGNSDSEEDDANGRVELILEPK	S102	2xPhospho [S4; S6]	6.57407e+06	4.82481e+06	184025	1.16715e+07	321748	1.59713e+07	2.0042e+07	2.37732e+07	1.63598e+06	0	442413	1.50471e+06	0	2.1779e+06	4.96831e+06	159121	1.02672e+07	277900	7.83019e+06	332040	1.08357e+06	815760	747322	98724.4	3.47285e+06	134992	517558	6.39752e+06	3.58744e+07	8.00643e+06	1.30229e+06	207694	1.30195e+06	1.07775e+06	3.62589e+07	3.61999e+06	1.0378e+07	316533	5.59173e+06	0	0	594741	3.39311e+06
J3KP36	WASH complex subunit 2C	WASHC2C	DKFZp434O171;WASHC2A;WASHC2C;FAM21A;FAM21B	AGNSDSEEDDANGRVELILEPK	S104	2xPhospho [S4; S6]	6.57407e+06	4.82481e+06	184025	1.16715e+07	321748	1.59713e+07	2.0042e+07	2.37732e+07	1.63598e+06	0	442413	1.50471e+06	0	2.1779e+06	4.96831e+06	159121	1.02672e+07	277900	7.83019e+06	332040	1.08357e+06	815760	747322	98724.4	3.47285e+06	134992	517558	6.39752e+06	3.58744e+07	8.00643e+06	1.30229e+06	207694	1.30195e+06	1.07775e+06	3.62589e+07	3.61999e+06	1.0378e+07	316533	5.59173e+06	0	0	594741	3.39311e+06
J3KP36	WASH complex subunit 2C	WASHC2C	DKFZp434O171;WASHC2A;WASHC2C;FAM21A;FAM21B	ERRTPSDDEEDNLFAPPK	T275	2xPhospho [T4; S6]	2.43826e+07	3.29328e+07	2.56193e+07	33878561	1.52897e+07	1.35229e+07	4.4044e+07	4.49717e+07	2.21999e+07	5.84607e+06	1.81407e+07	1.21641e+07	2.13297e+07	391185	2.30251e+07	3.12114e+07	2.15842e+07	3.73046e+07	2.55653e+07	1.48946e+07	1.4485e+07	3.88575e+07	1.87366e+07	1.10937e+07	2.77281e+07	3.08737e+07	1.70022e+07	3.38354e+07	2.78527e+07	2.39325e+07	5.36657e+07	4.98439e+07	0	2.2098e+07	5.18607e+07	2.01866e+07	4.26476e+07	3.59094e+07	2.95481e+07	1.09583e+07	2.38271e+07	1.32688e+07	2.48486e+07
J3KP36	WASH complex subunit 2C	WASHC2C	DKFZp434O171;WASHC2A;WASHC2C;FAM21A;FAM21B	ERRTPSDDEEDNLFAPPK	S277	2xPhospho [T4; S6]	2.43826e+07	3.29328e+07	2.56193e+07	33878561	1.52897e+07	1.35229e+07	4.4044e+07	4.49717e+07	2.21999e+07	5.84607e+06	1.81407e+07	1.21641e+07	2.13297e+07	391185	2.30251e+07	3.12114e+07	2.15842e+07	3.73046e+07	2.55653e+07	1.48946e+07	1.4485e+07	3.88575e+07	1.87366e+07	1.10937e+07	2.77281e+07	3.08737e+07	1.70022e+07	3.38354e+07	2.78527e+07	2.39325e+07	5.36657e+07	4.98439e+07	0	2.2098e+07	5.18607e+07	2.01866e+07	4.26476e+07	3.59094e+07	2.95481e+07	1.09583e+07	2.38271e+07	1.32688e+07	2.48486e+07
J3KP36	WASH complex subunit 2C	WASHC2C	DKFZp434O171;WASHC2A;WASHC2C;FAM21A;FAM21B	ERRTPSDDEEDNLFAPPK	T275	1xPhospho [T4]	0	0	667273	0	0	930505	945996	1.08427e+06	1.5358e+06	0	0	0	1.77403e+06	0	553208	0	0	0	3.45479e+06	0	1.25235e+06	2.31748e+06	0	2.57886e+06	0	1.2195e+06	2.17116e+06	0	0	0	2.09828e+06	1.89318e+06	0	0	0	1.33539e+06	980228	1.72228e+06	1.38574e+06	0	2.3535e+06	1.62421e+06	1.62069e+06
J3KP36	WASH complex subunit 2C	WASHC2C	DKFZp434O171;WASHC2A;WASHC2C;FAM21A;FAM21B	TPSDDEEDNLFAPPK	T275	2xPhospho [T1; S3]	234066	347165	0	605926	149265	0	3.223e+06	1.94726e+06	0	0	167059	0	0	0	0	329133	116569	291539	0	0	283012	171528	234322	202646	157877	0	172812	2.59907e+06	550136	323301	360445	142103	0	411650	182498	0	261474	323513	317481	0	0	0	1.83023e+06
J3KP36	WASH complex subunit 2C	WASHC2C	DKFZp434O171;WASHC2A;WASHC2C;FAM21A;FAM21B	TPSDDEEDNLFAPPK	S277	2xPhospho [T1; S3]	234066	347165	0	605926	149265	0	3.223e+06	1.94726e+06	0	0	167059	0	0	0	0	329133	116569	291539	0	0	283012	171528	234322	202646	157877	0	172812	2.59907e+06	550136	323301	360445	142103	0	411650	182498	0	261474	323513	317481	0	0	0	1.83023e+06
J3KP36	WASH complex subunit 2C	WASHC2C	DKFZp434O171;WASHC2A;WASHC2C;FAM21A;FAM21B	RSRPTSFADELAAR	S228	2xPhospho [S2; S6]	0	5.99644e+06	4.77011e+06	0	0	2.88565e+06	1.11004e+07	1.57263e+07	0	8.0648e+06	6.8328e+06	1.29137e+07	0	0	5.1302e+06	0	1.08273e+07	6.95467e+06	0	8.70769e+06	2.57984e+06	0	0	1.20413e+06	0	1.43677e+06	7.4384e+06	6.57439e+06	3.03148e+06	2.28959e+06	0	1.86342e+06	0	2.32692e+06	1.10242e+07	1.41631e+07	1.8389e+07	4.54193e+06	4.9583e+06	8.45291e+06	1.13579e+07	2.51708e+06	5.41652e+06
J3KP36	WASH complex subunit 2C	WASHC2C	DKFZp434O171;WASHC2A;WASHC2C;FAM21A;FAM21B	RSRPTSFADELAAR	S232	2xPhospho [S2; S6]	0	5.99644e+06	4.77011e+06	0	0	2.88565e+06	1.11004e+07	1.57263e+07	0	8.0648e+06	6.8328e+06	1.29137e+07	0	0	5.1302e+06	0	1.08273e+07	6.95467e+06	0	8.70769e+06	2.57984e+06	0	0	1.20413e+06	0	1.43677e+06	7.4384e+06	6.57439e+06	3.03148e+06	2.28959e+06	0	1.86342e+06	0	2.32692e+06	1.10242e+07	1.41631e+07	1.8389e+07	4.54193e+06	4.9583e+06	8.45291e+06	1.13579e+07	2.51708e+06	5.41652e+06
J3KP36	WASH complex subunit 2C	WASHC2C	DKFZp434O171;WASHC2A;WASHC2C;FAM21A;FAM21B	RSRPTSFADELAAR	S228	1xPhospho [S2]	0	0	1.21667e+06	0	0	892066	0	954879	0	0	0	0	0	0	668621	0	0	0	0	1.44596e+06	1.34855e+06	0	0	0	0	0	802344	1.25804e+06	3.69801e+06	0	0	0	0	0	1.41335e+06	2.40492e+06	0	1.66956e+06	2.34854e+06	0	0	0	0
A9QQ22	Actin nucleation promoting factor (Fragment)	WASH	WASHC1;WASH2P;WASH4P;WASH6P;WASH;WASH3P;DKFZp686C24272;FLJ00075;DKFZp434K1323	LFDAPLSISK	S162	1xPhospho [S7]	0	0	828310	0	0	0	0	0	0	0	0	0	0	0	0	0	0	0	0	0	0	0	0	0	0	0	0	0	0	0	0	0	0	0	0	0	0	0	0	0	0	0	0
A9QQ22	Actin nucleation promoting factor (Fragment)	WASH	WASHC1;WASH2P;WASH4P;WASH6P;WASH;WASH3P;DKFZp686C24272;FLJ00075;DKFZp434K1323	ATLLESIR	S316	1xPhospho [S6]	3.4308e+06	1.81672e+06	1.12785e+06	1.11738e+06	0	1.50789e+06	869195	1.1985e+06	1.79978e+06	0	1.88581e+06	2.26761e+06	0	0	0	0	2.47752e+06	905092	0	0	440963	0	0	0	0	0	0	0	0	0	0	0	0	0	0	1.75256e+06	0	0	0	0	0	0	597613
Q9Y6W5	Wiskott-Aldrich syndrome protein family member 2	WASF2	hCG_1771487;WASF2	MGQEFVESKEK	S215	1xPhospho [S8]; 1xOxidation [M1]	0	8.74943e+06	7.18058e+06	0	2.35023e+06	1.42218e+06	0	709827	1.80444e+06	0	1.31993e+06	0	0	0	1.94628e+06	0	0	0	0	0	1.50255e+06	0	1.74998e+06	0	1.59131e+06	1.05433e+06	0	2.61835e+06	0	1.06407e+06	2.89943e+06	0	0	1.10932e+06	0	1.39888e+06	0	0	0	0	0	0	1.90304e+06
Q9Y6W5	Wiskott-Aldrich syndrome protein family member 2	WASF2	hCG_1771487;WASF2	VTQLDPKEEEVSLQGINTR	S90	1xPhospho [S12]	0	0	0	0	0	0	0	632857	0	0	0	0	0	0	1.28715e+06	0	0	0	0	0	1.92747e+06	0	0	851143	739562	0	838491	0	0	1.46149e+06	0	0	0	0	3.04263e+06	0	707578	945465	755557	0	0	0	0
Q9Y6W5	Wiskott-Aldrich syndrome protein family member 2	WASF2	hCG_1771487;WASF2	NSLPVPVLETYNTCDTPPPLNNLTPYR	T129	1xCarbamidomethyl [C14]; 1xPhospho [T16]	0	0	918373	0	0	116047	0	0	0	0	0	0	0	0	0	0	0	0	0	0	117355	151436	110009	0	0	0	0	0	0	0	91070.6	0	0	325745	124062	0	0	0	0	0	0	0	0
Q9Y6W5	Wiskott-Aldrich syndrome protein family member 2	WASF2	hCG_1771487;WASF2	SDLLSAIR	S442	1xPhospho [S5]	0	0	0	0	0	0	0	0	0	0	0	0	0	0	0	0	0	0	0	0	0	0	0	0	0	0	0	0	0	0	0	0	0	0	0	0	0	0	0	0	0	0	381014
Q9Y6W5	Wiskott-Aldrich syndrome protein family member 2	WASF2	hCG_1771487;WASF2	DVVGNDVATILSRR	S474	1xPhospho [S12]	0	0	0	0	0	0	723740	0	0	0	0	0	0	0	0	0	0	0	0	0	0	0	0	0	0	0	0	0	0	0	0	0	0	0	700819	0	0	0	0	0	0	0	0
P42768	Wiskott-Aldrich syndrome protein	WAS	WAS	KISKADIGAPSGFK	S234	1xPhospho [S3]	3.45082e+06	1.00787e+06	2.24736e+06	1.17554e+06	3.91458e+06	1.42034e+06	5.76264e+06	5.28053e+06	0	0	2.95757e+06	1.78762e+06	0	3.59178e+06	1.22501e+06	1.55082e+06	1.23725e+06	863705	0	0	5.26457e+06	0	946299	650322	0	0	7.56782e+06	3.53474e+06	5.45245e+06	847788	1.17618e+06	0	2.81816e+06	0	0	6.30713e+06	1.50638e+06	9.82855e+06	1.27638e+07	0	1.26652e+06	2.6631e+06	999746
P42768	Wiskott-Aldrich syndrome protein	WAS	WAS	LIYDFIEDQGGLEAVR	Y291	1xPhospho [Y3]	2.53553e+06	1.81728e+06	995114	943906	282021	273357	235339	170135	0	0	57671.4	0	0	0	638684	97683.6	87464	343209	0	0	107194	127445	107759	86185.4	203641	0	156808	97149.8	197576	174982	236484	100586	0	95676.6	0	289944	184483	400443	449451	0	0	0	0
P42768	Wiskott-Aldrich syndrome protein	WAS	WAS	YRGLPAPGPSPADK	Y212	1xPhospho [Y1]	1.58089e+07	2.10649e+06	1.87413e+06	0	3.09428e+06	1.59669e+06	9.22372e+06	7.34269e+06	6.53996e+06	2.70002e+07	8.22109e+06	1.21697e+07	2.12345e+06	7.86776e+06	8.71865e+06	3.55193e+06	6.95881e+06	3.00441e+06	2.64322e+06	4.62666e+06	2.41384e+06	3.26608e+06	1.42285e+06	1.6415e+06	3.15942e+06	1.53445e+06	1.36661e+07	5.55571e+06	6.33855e+06	5.7635e+06	5.70519e+06	5.54176e+06	3.02958e+07	0	7.83435e+06	1.23863e+07	9.98079e+06	7.32452e+06	1.27842e+07	0	0	0	0
P42768	Wiskott-Aldrich syndrome protein	WAS	WAS	ADIGAPSGFK	S242	1xPhospho [S7]	0	0	0	0	0	0	0	0	0	0	0	0	0	0	0	0	0	0	0	0	0	0	0	0	0	0	0	0	0	0	0	0	0	0	0	0	0	0	0	0	0	0	0
P42768	Wiskott-Aldrich syndrome protein	WAS	WAS	GLPAPGPSPADK	S221	1xPhospho [S8]	2.62857e+06	0	0	0	0	0	0	3.22283e+06	0	0	1.23251e+06	0	0	0	0	1.53833e+06	2.35689e+06	1.65867e+06	1.22769e+06	2.23643e+06	3.2618e+06	0	2.59561e+06	2.71018e+06	1.67765e+06	1.80097e+06	2.27565e+06	3.53666e+06	0	0	1.85179e+06	3.71898e+06	0	2.13101e+06	2.61716e+06	2.72915e+06	6.53716e+06	1.94377e+06	0	1.62139e+06	1.46041e+06	0	1.9828e+06
P42768	Wiskott-Aldrich syndrome protein	WAS	WAS	QLPPPPTPANEER	T164	1xPhospho [T7]	9.20181e+06	5.05315e+06	5.99063e+06	2.69718e+06	2.38214e+06	2.08e+06	3.86556e+06	5.42136e+06	5.62229e+06	0	6.77604e+06	4.23857e+06	3.9252e+06	2.82689e+06	2.82473e+06	1.73499e+06	3.36548e+06	1.34675e+06	1.57639e+06	1.54129e+06	3.26543e+06	0	0	1.56756e+06	0	1.40756e+06	1.42369e+06	0	0	1.78831e+06	700141	0	2.92045e+06	0	1.93935e+06	6.4915e+06	0	0	1.46423e+06	2.6397e+06	0	2.08582e+06	0
G3V4N0	Tryptophan--tRNA ligase, cytoplasmic (Fragment)	WARS1	WARS1	AAAGEDYKADCPPGNPAPTS	T104	1xCarbamidomethyl [C11]; 1xPhospho [T19]	0	0	0	0	0	0	0	0	0	0	0	0	0	0	0	0	0	0	0	0	0	0	0	0	0	0	0	0	0	0	0	0	0	0	0	0	0	0	0	0	0	0	0
A0A024R6K8	T1-TrpRS	WARS	WARS;WARS1	KLSFDFQ	S467	1xPhospho [S3]	0	2.50981e+07	834208	1.80378e+07	355753	3.25777e+07	4.00767e+07	9.0271e+07	7.8388e+07	379841	1.91497e+07	0	188919	0	3.91345e+07	0	0	0	0	0	0	0	0	0	0	0	0	157708974	5.1281e+07	0	0	0	0	0	2.22535e+07	6.83487e+07	3.63852e+08	0	2.08534e+07	2.66759e+06	9.69741e+07	0	1.60402e+07
B2RTX8	WAPAL protein	WAPAL	WAPL;WAPAL	RPESPSEISPIKGSVR	S223	2xPhospho [S6; S]	1.92185e+07	1.20881e+07	4.29475e+06	2.71326e+07	1.85448e+07	5.16712e+06	2.7404e+07	3.8387e+07	1.53491e+07	2.83985e+07	1.95206e+07	1.83525e+07	1.7731e+06	4.45838e+06	3.24165e+07	1.76531e+07	2.14458e+07	2.26585e+07	2.15926e+07	2.31998e+07	1.47032e+07	1.02886e+07	1.80968e+07	1.90775e+07	2.7447e+07	2.06626e+07	3.05821e+07	7.40472e+07	3.12304e+07	2.41803e+07	4.17254e+07	2.48406e+07	1.6121e+07	1.74245e+07	2.24449e+07	2.44182e+07	6.27145e+07	2.92935e+07	2.61419e+07	5.89302e+07	3.23588e+07	1.72983e+07	2.00386e+07
B2RTX8	WAPAL protein	WAPAL	WAPL;WAPAL	YFGFDDLSESEDDEDDDCQVER	S459	1xCarbamidomethyl [C18]; 2xPhospho [S8; S10]	242088	0	74277.2	0	0	0	0	202339	0	0	107951	0	0	0	0	0	168056	0	0	0	204579	0	0	213281	0	0	0	24168.9	0	0	0	0	0	515657	0	0	83883.1	162622	0	0	0	0	0
B2RTX8	WAPAL protein	WAPAL	WAPL;WAPAL	YFGFDDLSESEDDEDDDCQVER	S461	1xCarbamidomethyl [C18]; 2xPhospho [S8; S10]	242088	0	74277.2	0	0	0	0	202339	0	0	107951	0	0	0	0	0	168056	0	0	0	204579	0	0	213281	0	0	0	24168.9	0	0	0	0	0	515657	0	0	83883.1	162622	0	0	0	0	0
B2RTX8	WAPAL protein	WAPAL	WAPL;WAPAL	IVEDDASISSCNK	S156	1xCarbamidomethyl [C11]; 1xPhospho [S7]	0	1.85218e+06	4.41344e+06	0	0	0	1.51878e+06	2.62247e+06	1.61525e+06	0	3.62698e+06	0	0	0	0	889127	1.55998e+06	1.32471e+06	0	1.46786e+06	781304	0	0	0	1.88618e+06	2.09347e+06	1.61593e+06	2.52194e+06	0	0	2.75451e+06	0	0	0	0	0	1.28275e+06	0	0	0	0	4.34474e+06	4.82955e+06
B2RTX8	WAPAL protein	WAPAL	WAPL;WAPAL	RPESPSEISPIK	S223	2xPhospho [S6; S]	1.02402e+07	6.62657e+06	4.6692e+06	1.21895e+07	6.81527e+06	0	9.68063e+06	1.42018e+07	3.41645e+06	8.22306e+06	8.44212e+06	7.43248e+06	0	0	4.61287e+06	9.94625e+06	6.85822e+06	9.95128e+06	6.73461e+06	1.04578e+07	4.61024e+06	1.602e+06	7.95348e+06	7.35057e+06	9.52675e+06	1.18767e+07	8.84407e+06	3.55655e+07	1.19408e+07	6.84438e+06	2.76588e+07	1.04167e+07	0	0	8.43325e+06	6.14575e+06	2.94183e+07	1.25581e+07	3.24613e+06	1.63952e+07	0	30031576	7.10563e+06
Q9BTA9	WW domain-containing adapter protein with coiled-coil	WAC	WAC	LPTPTSSVPAQK	T293	1xPhospho [T3]	6.9256e+06	6.38176e+06	1.09179e+07	7.64018e+06	7.37735e+06	2.87517e+07	1.37639e+07	8.3306e+06	1.63752e+07	2.19861e+07	1.67077e+07	2.35883e+07	1.79659e+07	1.9723e+07	2.50683e+07	6.864e+06	1.44409e+07	1.19517e+07	1.79255e+07	5.54524e+06	9.73986e+06	1.15811e+07	5.29071e+06	7.0022e+06	1.21955e+07	8.72278e+06	2.23486e+07	7.60159e+06	9.99729e+06	2.21676e+07	1.17684e+07	5.55222e+06	1.22068e+07	6.41794e+06	1.10094e+07	1.67169e+07	1.37937e+07	8.86934e+06	2.18913e+07	4.30218e+07	1.78061e+07	6.36052e+06	8.71444e+06
Q9BTA9	WW domain-containing adapter protein with coiled-coil	WAC	WAC	QQGHEPVSPR	S511	1xPhospho [S8]	1.12206e+07	7.95278e+06	8.98763e+06	1.26803e+07	4.12967e+06	3.69789e+06	6.20702e+06	0	0	8.68619e+06	1.01834e+07	7.99425e+06	1.09282e+07	0	7.80524e+06	1.31824e+07	1.34937e+07	1.03564e+07	1.22282e+07	1.21069e+07	1.52532e+07	6.01111e+06	1.05316e+07	1.57555e+07	0	1.18068e+07	0	1.67103e+07	1.05464e+07	1.33451e+06	1.39744e+07	1.77897e+07	91440.7	8.03375e+06	1.54482e+07	0	2.01744e+07	1.54624e+07	6.792e+06	1.28009e+07	0	7.83788e+06	1.66232e+07
Q9BTA9	WW domain-containing adapter protein with coiled-coil	WAC	WAC	SPSPGPNHTSNSSNASNATVVPQNSSAR	S534	2xPhospho [S12; S13]	0	0	0	0	0	0	0	0	0	0	0	0	0	0	0	0	2.47427e+06	0	0	0	0	0	0	0	0	0	0	0	0	0	0	0	0	0	0	0	2.99742e+06	0	0	0	0	0	0
Q9BTA9	WW domain-containing adapter protein with coiled-coil	WAC	WAC	SPSPGPNHTSNSSNASNATVVPQNSSAR	S535	2xPhospho [S12; S13]	0	0	0	0	0	0	0	0	0	0	0	0	0	0	0	0	2.47427e+06	0	0	0	0	0	0	0	0	0	0	0	0	0	0	0	0	0	0	0	2.99742e+06	0	0	0	0	0	0
Q9BTA9	WW domain-containing adapter protein with coiled-coil	WAC	WAC	DAGDPSPPNK	S53	1xPhospho [S6]	0	2.01391e+06	1.64302e+06	3.1015e+06	0	0	971404	0	0	696158	2.02402e+06	0	2.85455e+06	0	2.00257e+06	2.30794e+06	1.7007e+06	2.19027e+06	2.27585e+06	2.93989e+06	2.86303e+06	1.63066e+06	2.64604e+06	3.33022e+06	2.80191e+06	2.12633e+06	1.90416e+06	2.68512e+06	1.87574e+06	2.00756e+06	2.2133e+06	2.70334e+06	0	1.12415e+06	0	0	3.03298e+06	2.75089e+06	1.38242e+06	0	0	0	2.77591e+06
Q9BTA9	WW domain-containing adapter protein with coiled-coil	WAC	WAC	RGDSQPYQALK	S22	1xPhospho [S4]	2.57128e+06	624961	3.95142e+06	1.01283e+06	1.32919e+06	1.43212e+06	2.76788e+06	2.99311e+06	1.54241e+06	2.10041e+06	3.14024e+06	5.80414e+06	1.4587e+06	2.8339e+06	992865	967391	2.75336e+06	1.68338e+06	0	828874	610261	0	0	0	0	1.87618e+06	4.94355e+06	4.35674e+06	0	4.2837e+06	5.84364e+06	0	0	0	0	1.41121e+06	3.46498e+06	2.39771e+06	2.58662e+06	2.03174e+06	4.83374e+06	4.59373e+06	3.8322e+06
O00534	von Willebrand factor A domain-containing protein 5A	VWA5A	VWA5A	AKTFQMDDYSLCGLISHK	T654	1xCarbamidomethyl [C12]; 1xPhospho [T3]	0	0	0	0	0	0	355967	0	0	0	0	0	0	0	0	0	0	0	0	0	0	0	0	0	0	0	0	0	0	0	0	0	0	0	0	0	0	0	0	0	0	0	0
O00534	von Willebrand factor A domain-containing protein 5A	VWA5A	VWA5A	VQSNCPLSPTEYLGEDK	S202	1xCarbamidomethyl [C5]; 1xPhospho [S8]	0	686399	0	1.10859e+06	716040	0	1.4511e+06	793181	2.91157e+06	0	775537	0	0	0	996958	187592	145491	1.30888e+06	204520	1.1049e+06	1.07194e+06	0	0	0	149530	100014	0	1.81613e+06	1.03113e+06	0	0	0	0	0	1.17599e+06	0	0	0	0	0	0	0	1.57256e+06
O00534	von Willebrand factor A domain-containing protein 5A	VWA5A	VWA5A	YQFSGSSKDSCLNVK	S162	1xCarbamidomethyl [C11]; 1xPhospho [S10]	0	0	5.07012e+06	1.9184e+06	0	2.36342e+06	5.98224e+06	1.982e+06	4.81728e+06	0	2.9928e+06	4.38462e+06	3.56122e+06	2.43958e+06	1.92347e+06	0	3.0409e+06	0	0	0	2.12633e+06	0	0	0	0	0	0	0	1.17937e+06	2.40327e+06	0	0	0	0	0	0	0	0	2.56107e+06	0	0	0	2.22212e+06
A6NCI4	von Willebrand factor A domain-containing protein 3A	VWA3A	VWA3A	RTSSSIDLPR	S848	1xPhospho [S3]	0	0	0	0	0	0	0	690125	0	0	0	0	0	0	0	0	4.30509e+06	0	1.29448e+06	0	0	0	0	0	3.60894e+06	0	996630	0	1.91345e+06	0	0	0	0	0	0	1.01723e+06	1.97878e+06	0	0	0	0	0	0
A6NCI4	von Willebrand factor A domain-containing protein 3A	VWA3A	VWA3A	TSSSIDLPR	S848	1xPhospho [S2]	0	0	0	387472	0	0	312269	534853	0	0	0	0	0	0	0	0	0	2.14928e+06	0	0	0	0	352838	0	518508	0	449696	0	368167	488114	0	0	0	0	0	0	0	0	0	0	0	0	0
D9ZGG2	Vitronectin	VTN	VTN	IYISGMAPRPSLAK	S364	1xPhospho [S11]	1.08686e+06	0	0	0	0	2.90212e+06	0	3.20554e+06	0	0	0	0	0	0	0	1.73131e+06	0	0	0	0	0	0	0	0	0	0	0	0	0	0	0	0	0	0	0	0	0	0	0	0	0	0	1.14234e+06
D9ZGG2	Vitronectin	VTN	VTN	IYISGMAPRPSLAK	S364	1xPhospho [S11]; 1xOxidation [M6]	1.26011e+06	788373	0	0	1.762e+06	2.31823e+06	999008	6.10121e+06	0	0	1.1039e+06	0	0	0	0	3.58828e+06	0	0	0	0	0	0	0	0	0	0	0	0	0	0	0	0	0	0	0	862348	0	0	0	0	0	0	1.22453e+06
D9ZGG2	Vitronectin	VTN	VTN	GDVFTMPEDEYTVYDDGEEK	Y75	2xPhospho [Y11; T12]	8.045e+06	1.31607e+06	379885	836505	791941	1.10874e+06	149371	4.31913e+06	1.45543e+06	851094	0	0	0	0	0	0	772891	886697	341965	247540	0	0	0	460557	396670	307495	308612	1.27897e+06	380051	442285	433199	240307	0	756119	0	298362	1.99363e+06	1.30724e+06	478669	0	0	0	2.22892e+06
D9ZGG2	Vitronectin	VTN	VTN	GDVFTMPEDEYTVYDDGEEK	T76	2xPhospho [Y11; T12]	8.045e+06	1.31607e+06	379885	836505	791941	1.10874e+06	149371	4.31913e+06	1.45543e+06	851094	0	0	0	0	0	0	772891	886697	341965	247540	0	0	0	460557	396670	307495	308612	1.27897e+06	380051	442285	433199	240307	0	756119	0	298362	1.99363e+06	1.30724e+06	478669	0	0	0	2.22892e+06
D9ZGG2	Vitronectin	VTN	VTN	GDVFTMPEDEYTVYDDGEEK	T76	2xPhospho [T12; Y/T]; 1xOxidation [M6]	807552	0	0	0	1.06768e+06	1.54148e+06	1.26298e+06	1.20916e+06	0	0	0	0	0	0	0	624026	549378	0	0	0	1.75166e+06	1.66474e+06	153269	1.2831e+06	121160	96500.3	160903	743477	0	347363	637323	122559	0	443440	0	0	0	0	768810	0	0	0	587067
Q9UEU0	Vesicle transport through interaction with t-SNAREs homolog 1B	VTI1B	VTI1B	YGIYAVENEHMNR	Y115	1xPhospho [Y4]; 1xOxidation [M11]	0	1.35409e+06	1.70986e+06	0	1.0158e+06	0	0	0	0	0	1.51097e+06	0	0	0	0	0	0	809235	0	1.21274e+06	0	0	0	0	0	1.42698e+06	1.87023e+06	0	0	0	1.98206e+06	1.11055e+06	0	0	0	0	0	0	0	0	0	0	1.33697e+06
Q9UEU0	Vesicle transport through interaction with t-SNAREs homolog 1B	VTI1B	VTI1B	IATETDQIGSEIIEELGEQR	T154	1xPhospho [T3]	0	0	206593	0	0	0	0	53364.3	0	0	0	0	0	0	0	180706	0	0	211200	0	180016	0	120565	0	0	0	0	0	60499.8	0	0	0	0	0	120737	0	64271	0	118566	0	0	0	0
Q9UEU0	Vesicle transport through interaction with t-SNAREs homolog 1B	VTI1B	VTI1B	AMLLQGTESLNR	S138	1xPhospho [S9]; 1xOxidation [M2]	706667	0	1.50422e+06	1.05831e+06	807932	0	1.80432e+06	1.14937e+06	0	0	798839	0	0	0	0	0	0	0	0	1.01961e+06	0	0	0	0	0	1.24588e+06	835071	803665	0	0	0	0	0	0	0	1.8406e+06	651718	570772	2.33057e+06	2.67267e+06	0	0	945336
H7C062	V-set and immunoglobulin domain-containing protein 4 (Fragment)	VSIG4	VSIG4	KTSQQEHVYEAASPK	S238	1xPhospho [S3]	889583	0	0	0	0	0	0	0	1.32216e+06	2.98498e+06	0	5.9039e+06	0	7.42503e+06	0	7.64774e+06	2.83785e+06	0	2.10037e+06	0	0	0	0	0	3.58813e+06	0	0	0	0	3.30443e+06	0	0	0	0	0	3.76657e+06	0	0	0	0	0	0	0
Q96IQ7	V-set and immunoglobulin domain-containing protein 2	VSIG2	VSIG2	ETYGGSDLREDAIAPGISEHTCMR	S281	1xCarbamidomethyl [C22]; 1xPhospho [S6]; 1xOxidation [M23]	0	0	0	0	0	0	975994	0	0	0	1.23114e+06	0	0	0	852399	0	0	0	0	0	0	0	0	0	0	0	913106	1.06369e+06	0	0	0	0	0	0	0	0	0	0	0	0	0	0	731058
Q86XK7	V-set and immunoglobulin domain-containing protein 1	VSIG1	VSIG1	NSKTIAELEPMTKINPR	T272	2xPhospho [T4; T12]	0	0	0	0	0	0	0	0	864043	278950	0	0	0	0	0	0	0	0	0	506915	977148	0	1.65196e+06	0	1.34698e+06	4.7947e+06	0	0	0	0	0	2.11961e+06	0	0	1.50205e+06	3.8445e+06	0	0	0	5.10988e+06	4.22847e+06	0	0
Q86XK7	V-set and immunoglobulin domain-containing protein 1	VSIG1	VSIG1	NSKTIAELEPMTKINPR	T280	2xPhospho [T4; T12]	0	0	0	0	0	0	0	0	864043	278950	0	0	0	0	0	0	0	0	0	506915	977148	0	1.65196e+06	0	1.34698e+06	4.7947e+06	0	0	0	0	0	2.11961e+06	0	0	1.50205e+06	3.8445e+06	0	0	0	5.10988e+06	4.22847e+06	0	0
Q86XK7	V-set and immunoglobulin domain-containing protein 1	VSIG1	VSIG1	TIAELEPMTKINPR	T280	1xPhospho [T9]	0	0	0	0	0	0	0	0	0	0	1.00934e+06	0	0	0	0	0	1.41396e+06	0	0	0	0	0	0	0	0	635489	0	1.08451e+06	0	0	0	0	0	0	0	651446	825051	0	0	0	0	0	0
Q86XK7	V-set and immunoglobulin domain-containing protein 1	VSIG1	VSIG1	TIAELEPMTK	T272	1xPhospho [T1]	0	0	0	873344	0	0	0	0	2.44514e+06	0	880955	0	0	0	0	703594	0	0	0	864965	757046	0	0	0	1.05849e+06	0	745704	481352	0	1.73632e+06	0	542273	0	0	0	0	0	0	0	0	0	0	0
Q86XK7	V-set and immunoglobulin domain-containing protein 1	VSIG1	VSIG1	ERNSKTIAELEPMTK	S270	2xPhospho [S4; T6]; 1xOxidation [M13]	6.18344e+06	0	1.37594e+06	0	0	1.43405e+06	0	752100	0	0	0	0	3.35375e+06	0	0	0	0	0	0	530683	0	0	0	0	0	1.48767e+06	0	1.42182e+06	1.54029e+06	2.73558e+06	1.76785e+06	0	0	0	1.29814e+06	0	0	1.8712e+06	1.09271e+06	2.41468e+06	0	0	0
Q86XK7	V-set and immunoglobulin domain-containing protein 1	VSIG1	VSIG1	ERNSKTIAELEPMTK	T272	2xPhospho [S4; T6]; 1xOxidation [M13]	6.18344e+06	0	1.37594e+06	0	0	1.43405e+06	0	752100	0	0	0	0	3.35375e+06	0	0	0	0	0	0	530683	0	0	0	0	0	1.48767e+06	0	1.42182e+06	1.54029e+06	2.73558e+06	1.76785e+06	0	0	0	1.29814e+06	0	0	1.8712e+06	1.09271e+06	2.41468e+06	0	0	0
Q86XK7	V-set and immunoglobulin domain-containing protein 1	VSIG1	VSIG1	TIAELEPMTK	T272	1xPhospho [T1]; 1xOxidation [M8]	0	1.08121e+06	0	0	1.39157e+06	0	0	0	1.15995e+07	0	561547	0	1.63002e+06	0	0	0	1.39231e+06	1.0335e+06	0	0	0	0	0	747201	0	941647	0	0	0	0	0	767654	0	0	0	0	0	0	988430	0	0	0	0
Q86XK7	V-set and immunoglobulin domain-containing protein 1	VSIG1	VSIG1	GESEAMPR	S288	1xPhospho [S3]	0	0	1.34552e+06	0	975197	0	0	0	1.51444e+07	0	0	0	2.07856e+06	0	0	0	0	0	1.01329e+06	3.02575e+06	0	0	0	1.36607e+06	0	0	3.57007e+06	0	0	0	0	0	0	998547	0	0	0	0	0	5.18873e+06	0	3.90347e+07	0
Q8IV63	Inactive serine/threonine-protein kinase VRK3	VRK3	VRK3	GLNSSFETSPKK	S59	1xPhospho [S9]	0	0	0	0	0	0	0	2.59069e+06	769549	2.22723e+06	0	0	0	0	0	0	0	0	0	0	2.62968e+06	0	928237	0	1.31805e+06	2.16006e+06	2.16987e+06	1.09111e+07	1.08655e+06	0	2.48564e+06	2.26672e+06	0	0	955228	855894	0	0	0	0	0	0	0
Q05CR6	VRK2 protein (Fragment)	VRK2	VRK2	YQESQEPLNEVNSFPQK	S406	1xPhospho [S4]	1.00476e+06	0	1.94784e+06	1.18071e+06	0	2.90941e+06	1.12296e+06	1.45777e+06	6.12495e+06	0	977700	1.74411e+06	0	0	0	3.35866e+06	3.81612e+06	0	0	0	1.17843e+06	0	1.80433e+06	2.95668e+06	1.37396e+06	0	1.74532e+06	736793	1.88619e+06	0	3.9903e+06	0	0	1.70364e+06	0	0	0	0	0	0	0	0	978399
F8WB24	Vacuolar protein sorting-associated protein 8 homolog	VPS8	VPS8	TSEEELNKSFNLEASLSK	S26	1xPhospho [S9]	3.24818e+06	7.11712e+06	0	0	1.67215e+06	0	752095	0	0	0	811649	0	0	0	0	0	602331	0	0	0	0	0	0	0	0	4.82431e+06	0	0	8.44595e+06	604599	1.31828e+06	0	0	0	5.17655e+06	1.208e+06	885811	0	1.68481e+06	3.59143e+06	1.66515e+06	0	0
F8WB24	Vacuolar protein sorting-associated protein 8 homolog	VPS8	VPS8	SFNLEASLSK	S32	1xPhospho [S7]	1.30455e+06	1.46873e+06	1.05828e+06	0	914175	1.23968e+06	1.42234e+06	1.20977e+06	0	0	1.18567e+06	0	0	0	0	0	1.88375e+06	0	0	0	1.56382e+06	0	0	0	0	0	0	0	803818	632933	0	0	0	0	522473	865922	778966	0	771807	0	0	0	0
Q5VIR6	Vacuolar protein sorting-associated protein 53 homolog	VPS53	VPS53	KLESPPPSTNPFLEDEPTPEMEELATEK	T391	1xPhospho [T18]; 1xOxidation [M21]	386914	0	0	0	424906	2.96466e+06	2.47427e+06	0	1.79145e+06	0	0	0	743271	201997	0	0	0	0	0	183029	0	679223	165088	0	285001	421627	682554	3.98462e+06	0	223090	175954	309756	0	0	0	0	0	0	0	0	0	0	0
Q5VIR6	Vacuolar protein sorting-associated protein 53 homolog	VPS53	VPS53	LESPPPSTNPFLEDEPTPEMEELATEKGDLDQPK	S381	3xPhospho [S7; T8; T/S]; 1xOxidation [M20]	0	0	0	0	0	0	0	0	0	0	0	0	0	0	0	0	0	0	0	0	0	407192	0	0	595121	0	180160	0	0	0	179520	0	0	278058	1.39253e+06	684247	0	0	0	0	0	0	0
Q5VIR6	Vacuolar protein sorting-associated protein 53 homolog	VPS53	VPS53	LESPPPSTNPFLEDEPTPEMEELATEKGDLDQPK	T382	3xPhospho [S7; T8; T/S]; 1xOxidation [M20]	0	0	0	0	0	0	0	0	0	0	0	0	0	0	0	0	0	0	0	0	0	407192	0	0	595121	0	180160	0	0	0	179520	0	0	278058	1.39253e+06	684247	0	0	0	0	0	0	0
Q9UID3	Vacuolar protein sorting-associated protein 51 homolog	VPS51	VPS51	MAAAAAAGPSPGSGPGDSPEGPEGEAPER	S13	2xPhospho [S13; S]; 1xMet-loss [N-Term]	6.83782e+06	1.19505e+07	2.83037e+06	1.58805e+06	0	8.67293e+06	2.60504e+06	2.11584e+06	5549404	1.01574e+07	0	0	0	0	2.29235e+06	3.37976e+06	2.93105e+06	2.47057e+06	1.89158e+06	4.50078e+06	955709	8.082e+06	5.71791e+06	3.37486e+06	0	7.56697e+06	1.49662e+06	3.17924e+06	0	0	4.21813e+06	2.27453e+06	1.01869e+07	2.17762e+06	4.12726e+06	0	3.64e+06	2.82506e+06	0	0	0	0	0
A0A2R8YEX8	Vacuolar protein sorting-associated protein 45 (Fragment)	VPS45	VPS45	EQQKLESIADMK	S93	1xPhospho [S7]	2.12331e+06	4.28675e+06	2.22367e+06	643950	3.3197e+06	919313	1.50167e+06	1.77523e+06	0	1.49412e+06	1.86123e+06	0	3.72197e+06	0	806945	1.79545e+06	3.58038e+06	0	1.38133e+06	3.52343e+06	2.33438e+06	0	0	0	2.48601e+06	1.59324e+06	1.98476e+06	0	1.24645e+06	1.73017e+06	0	0	0	0	0	3.75e+06	5.76547e+06	2.2418e+06	1.548e+06	0	1.27327e+07	3.88243e+06	7.01741e+06
Q96QK1	Vacuolar protein sorting-associated protein 35	VPS35	VPS35	LRRESPESEGPIYEGLIL	S783	1xPhospho [S5]	0	0	0	0	0	0	0	0	0	0	0	0	0	0	623643	0	0	0	0	0	0	0	0	0	0	0	0	0	0	0	0	0	0	0	0	0	0	0	0	0	0	0	0
Q96QK1	Vacuolar protein sorting-associated protein 35	VPS35	VPS35	RESPESEGPIYEGLIL	S783	1xPhospho [S3]	0	0	369370	477611	0	0	0	0	0	0	0	0	0	0	108236	0	0	0	0	0	69511.5	0	0	0	0	0	0	0	0	126057	0	0	0	0	0	0	0	0	0	0	0	0	0
A0A0S2Z5H5	Vacuolar protein sorting-associated protein 28 homolog (Fragment)	VPS28	VPS28	MFHGIPATPGIGAPGNKPELYEEVK	T8	1xAcetyl [N-Term]; 1xPhospho [T8]	0	251381	1.07686e+06	0	0	300013	0	38456.1	0	0	245740	0	0	0	0	0	0	0	109692	0	0	0	0	237475	0	232547	0	25862.9	0	387984	0	54765.8	0	0	39739.4	0	0	0	224632	0	0	0	0
A0A024R3L9	Vacuolar protein sorting 26 homolog B (Yeast), isoform CRA_a	VPS26B	VPS26B	TPSQLSDNNCR	S327	1xCarbamidomethyl [C10]; 1xPhospho [S3]	3.32438e+06	0	2.31172e+06	0	0	0	0	0	0	0	1.5217e+06	0	0	0	0	1.17151e+06	0	0	0	1.01278e+06	1.15472e+06	0	1.42778e+06	1.17824e+06	0	2.87837e+06	1.9233e+06	1.5038e+06	1.53284e+06	0	0	0	0	0	0	1.83e+06	0	1.30799e+06	0	0	0	0	0
A0A024R3L9	Vacuolar protein sorting 26 homolog B (Yeast), isoform CRA_a	VPS26B	VPS26B	KSMSHQAAIASQR	S302	1xPhospho [S2]; 1xOxidation [M3]	0	808355	0	0	0	0	0	0	0	0	0	0	0	0	1.70311e+06	0	0	0	420865	505026	286337	274101	0	0	0	0	0	0	0	0	734856	0	0	0	0	0	0	129293	1.17193e+06	0	0	0	0
O75436	Vacuolar protein sorting-associated protein 26A	VPS26A	VPS26A	HYLFYDGESVSGK	S47	1xPhospho [S9]	994680	0	1.92475e+06	0	837087	0	1.09413e+06	1.01106e+06	2.271e+06	0	4.35136e+06	0	803765	0	0	0	2.44093e+06	0	1.33855e+06	945757	957689	0	839628	660194	954294	767430	821709	4.85627e+06	739709	1.50234e+06	857273	634956	0	3.71824e+06	828349	448255	2.25073e+06	0	0	0	0	0	575993
Q5THJ4	Vacuolar protein sorting-associated protein 13D	VPS13D	VPS13D	TRSTASLTNLEHQIYAR	S2861	2xPhospho [S3; S6]	0	0	1.49832e+06	0	0	0	0	0	0	0	0	0	0	0	0	0	0	0	0	0	0	0	0	0	0	0	0	1.61595e+06	0	0	0	0	0	0	0	1.30973e+06	0	0	0	0	0	0	0
Q5THJ4	Vacuolar protein sorting-associated protein 13D	VPS13D	VPS13D	TRSTASLTNLEHQIYAR	S2864	2xPhospho [S3; S6]	0	0	1.49832e+06	0	0	0	0	0	0	0	0	0	0	0	0	0	0	0	0	0	0	0	0	0	0	0	0	1.61595e+06	0	0	0	0	0	0	0	1.30973e+06	0	0	0	0	0	0	0
Q5THJ4	Vacuolar protein sorting-associated protein 13D	VPS13D	VPS13D	VHTSGFGYQSELELR	S663	1xPhospho [S10]	819020	2.14195e+06	2.21104e+07	4.64708e+06	1.29167e+07	9.35302e+06	1.02422e+07	1.85612e+07	1.55594e+07	0	1.32782e+07	5.70773e+06	133253	0	3.37139e+06	110666	164368	1.57857e+07	101661	1.10178e+07	1.34569e+07	1.06886e+06	7.07459e+06	8.83287e+06	6.08763e+07	1.13255e+07	3.11615e+07	0	3.32728e+07	6.22631e+06	500320	5.83452e+06	0	2.23156e+06	0	9.57268e+06	2.8378e+06	9.08079e+06	9.6736e+06	3.97159e+06	0	0	5.81523e+06
Q5THJ4	Vacuolar protein sorting-associated protein 13D	VPS13D	VPS13D	EKDDLSPQPLMTDFER	S1138	1xPhospho [S6]; 1xOxidation [M11]	2.37876e+06	6.77351e+06	2.62401e+07	1.21452e+07	1.97751e+07	2.84009e+07	1.66041e+07	1.71622e+07	2.52926e+07	0	2.11378e+07	5.56471e+06	1.747e+07	0	6.07125e+06	1.25798e+07	3.9483e+06	1.6886e+07	1.76883e+07	8.57768e+06	2.15801e+07	0	2.50868e+06	1.57829e+07	7.4954e+06	7.72231e+06	1.41581e+07	4.93155e+06	2.25554e+06	3.75048e+07	9.8188e+06	1.48583e+07	0	6.42382e+06	1.75012e+07	1.40179e+07	8.61149e+06	4.04418e+06	1.85281e+07	0	0	0	4.93448e+06
Q5THJ4	Vacuolar protein sorting-associated protein 13D	VPS13D	VPS13D	EKDDLSPQPLMTDFER	S1138	1xPhospho [S6]	439583	6.63106e+06	3.05257e+06	2.02434e+06	0	9.70937e+06	4.85717e+06	2.93899e+06	131588	192865	4.25979e+06	0	0	0	3.43697e+06	305014	150179	698068	260335	0	78186.5	0	182728	474951	0	1.11443e+06	664952	6.11811e+06	2.23651e+06	0	871805	218696	0	233500	1.16217e+06	0	0	691109	1.32377e+06	0	1.3218e+07	0	1.0134e+07
Q5THJ4	Vacuolar protein sorting-associated protein 13D	VPS13D	VPS13D	QKEVQDKDYPLTPPPSPTVDEPK	T1761	2xPhospho [T/S/Y]	5.75227e+07	0	0	5.05919e+07	8.02348e+07	0	0	0	0	0	0	0	0	0	0	0	0	0	0	0	0	0	6.1198e+07	0	0	5.52075e+07	0	5.31593e+07	0	0	0	0	0	0	0	0	0	0	0	0	0	0	0
Q5THJ4	Vacuolar protein sorting-associated protein 13D	VPS13D	VPS13D	DYPLTPPPSPTVDEPK	T1761	2xPhospho [T5; S9]	1.12229e+06	0	2.0658e+06	0	1.26862e+06	0	0	933085	0	0	1.16898e+06	0	0	0	0	0	0	0	0	779922	0	0	0	0	0	1.2797e+06	924058	0	0	0	0	1.0861e+06	0	0	0	483302	0	0	0	0	0	0	0
Q5THJ4	Vacuolar protein sorting-associated protein 13D	VPS13D	VPS13D	DYPLTPPPSPTVDEPK	S1765	2xPhospho [T5; S9]	1.12229e+06	0	2.0658e+06	0	1.26862e+06	0	0	933085	0	0	1.16898e+06	0	0	0	0	0	0	0	0	779922	0	0	0	0	0	1.2797e+06	924058	0	0	0	0	1.0861e+06	0	0	0	483302	0	0	0	0	0	0	0
Q5THJ4	Vacuolar protein sorting-associated protein 13D	VPS13D	VPS13D	HDFFESLHR	S1478	1xPhospho [S6]	0	618665	852727	0	0	0	0	0	0	0	767046	0	0	0	0	0	0	0	0	0	0	0	0	0	0	0	0	0	0	0	0	0	0	0	0	0	0	0	0	0	0	0	0
Q5THJ4	Vacuolar protein sorting-associated protein 13D	VPS13D	VPS13D	SATSVSLDKILTK	S1067	1xPhospho [S6]	0	0	816482	0	0	0	1.2755e+06	0	0	0	556765	0	0	0	0	0	0	1.15599e+06	0	524413	1.76416e+06	375841	0	0	0	0	0	502614	1.53687e+06	0	0	0	0	0	0	0	562558	0	0	0	0	0	0
Q5THJ4	Vacuolar protein sorting-associated protein 13D	VPS13D	VPS13D	RSSLPVSNER	S2455	1xPhospho [S3]	0	2.35246e+06	2.81748e+06	3.59604e+06	3.85843e+06	4.06204e+06	3.44565e+06	3.25412e+06	0	5.08213e+06	3.0387e+06	3.37648e+06	0	0	2.70959e+06	6.80595e+06	3.35229e+06	2.09459e+06	3.09182e+06	1.61194e+06	3.39062e+06	1.37209e+06	6.66159e+06	2.44993e+06	4.13413e+06	0	4.6017e+06	4.61791e+06	1.93259e+06	5.36732e+06	2.19354e+06	2.64305e+06	0	0	0	0	0	0	3.18516e+06	2.77364e+06	0	0	3.12335e+06
Q709C8	Vacuolar protein sorting-associated protein 13C	VPS13C	VPS13C	VQETGEIKEPLEISISQDVHDSKNTLTTGVEEIR	T1409	1xPhospho [T25]	0	0	0	475530	0	0	0	0	0	0	575247	0	0	0	0	0	0	72994.8	0	0	0	0	0	0	0	0	0	0	0	0	0	63740.7	0	0	0	0	0	0	0	0	0	0	891138
Q709C8	Vacuolar protein sorting-associated protein 13C	VPS13C	VPS13C	YHCAIPGSKK	S3641	1xCarbamidomethyl [C3]; 1xPhospho [S8]	0	0	993334	0	0	551101	0	0	0	0	2.04394e+06	5.46783e+06	0	0	1.76132e+06	0	0	0	0	2.13398e+06	748477	2.63772e+06	2.12667e+06	5.83664e+06	0	2.18035e+06	0	3.12608e+06	0	0	1.11949e+06	0	0	0	1.69454e+06	0	1.4715e+06	0	1.2522e+06	0	0	0	0
Q709C8	Vacuolar protein sorting-associated protein 13C	VPS13C	VPS13C	KVDVSSVPDHLKEQEDWTDSK	S1912	1xPhospho [S6]	1.14633e+06	0	0	642567	1.87948e+06	687590	0	698101	1.71382e+06	0	0	0	3.41513e+06	0	702733	966888	1.89462e+06	0	1.29236e+06	0	2.30181e+06	0	0	0	1.10941e+06	1.28673e+06	0	0	0	0	0	0	0	1.04898e+06	0	743860	1.52357e+06	761602	696391	0	0	0	0
Q709C8	Vacuolar protein sorting-associated protein 13C	VPS13C	VPS13C	DFGDSLAR	S3516	1xPhospho [S5]	1.17614e+07	1.19285e+07	1.02172e+07	9.69091e+06	7.77731e+06	6.23084e+06	13099679	5.42443e+06	1.47051e+07	4.09658e+06	8.93329e+06	6.48468e+06	3.81853e+07	7.67197e+06	5.18885e+06	8.59877e+06	1.22523e+07	1.15862e+07	2.88954e+06	6.63207e+06	1.82194e+07	0	3.30421e+06	8.10159e+06	5.01761e+06	8.11864e+06	5.47254e+06	2.96783e+06	3.45874e+06	8.39959e+06	7.38354e+06	4.86528e+06	6.71259e+06	0	0	7.46631e+06	8.06089e+06	4.28423e+06	4.35151e+06	7.13928e+06	1.05155e+07	2.29351e+07	1.18584e+07
Q7Z7G8	Vacuolar protein sorting-associated protein 13B	VPS13B	VPS13B	RKEDEVSIGSAPLAK	S999	2xPhospho [S7; S10]	0	2.74399e+06	0	2.40317e+06	0	0	445221	1.5415e+06	0	1.79251e+06	0	0	1.0765e+08	0	0	3.11179e+06	0	2.30935e+06	0	2.01665e+06	0	0	883897	0	1.69242e+06	3.77052e+06	2.83181e+06	2.37583e+06	1.65824e+06	1.51852e+06	3.52316e+06	3.94535e+06	0	0	0	0	518297	0	0	9.45144e+06	1.18402e+07	3.20127e+07	8.86321e+06
Q7Z7G8	Vacuolar protein sorting-associated protein 13B	VPS13B	VPS13B	RKEDEVSIGSAPLAK	S1002	2xPhospho [S7; S10]	0	2.74399e+06	0	2.40317e+06	0	0	445221	1.5415e+06	0	1.79251e+06	0	0	1.0765e+08	0	0	3.11179e+06	0	2.30935e+06	0	2.01665e+06	0	0	883897	0	1.69242e+06	3.77052e+06	2.83181e+06	2.37583e+06	1.65824e+06	1.51852e+06	3.52316e+06	3.94535e+06	0	0	0	0	518297	0	0	9.45144e+06	1.18402e+07	3.20127e+07	8.86321e+06
Q7Z7G8	Vacuolar protein sorting-associated protein 13B	VPS13B	VPS13B	RKEDEVSIGSAPLAK	S999	1xPhospho [S7]	0	1.20172e+06	1.01445e+06	0	0	0	1.62276e+06	2.2688e+06	0	1.33384e+06	984933	0	1.603e+06	0	1.42533e+06	1.13826e+06	819925	0	0	1.55794e+06	600421	0	1.52634e+06	1.37795e+06	799359	4.69656e+06	1.35047e+06	1.55004e+06	1.36422e+06	0	2.87486e+06	3.99913e+06	0	1.69735e+06	0	1.1627e+06	1.61449e+06	0	1.29577e+06	1.92707e+06	1.76766e+06	1.99133e+06	946086
Q7Z7G8	Vacuolar protein sorting-associated protein 13B	VPS13B	VPS13B	YSGAQDSGIGSDSVK	S1798	1xPhospho [S11]	0	0	0	0	0	925208	0	1.07707e+06	1.28275e+06	0	1.44946e+06	0	0	0	0	0	0	0	0	0	0	0	0	0	0	2.61844e+06	0	0	0	0	0	3.17479e+06	0	0	0	0	0	0	0	0	0	0	1.29374e+06
Q9H270	Vacuolar protein sorting-associated protein 11 homolog	VPS11	DKFZp564P2364;VPS11	IRQEIQELKASPK	S813	1xPhospho [S11]	0	0	1.42962e+06	0	2.17197e+06	1.01639e+06	2.06776e+06	1.34358e+06	0	0	0	2.07397e+06	0	0	1.82236e+06	0	0	0	1.04884e+06	1.08517e+06	2.64205e+06	0	1.29245e+06	1.06851e+06	1.45949e+06	0	2.42148e+06	1.93874e+06	4.51727e+06	0	0	0	0	2.63763e+06	4.67691e+06	2.4728e+06	0	2.12258e+06	5.04356e+06	0	0	0	0
Q9H270	Vacuolar protein sorting-associated protein 11 homolog	VPS11	DKFZp564P2364;VPS11	QEIQELKASPK	S813	1xPhospho [S9]	0	7.1311e+06	0	0	1.63179e+06	4.00946e+06	1.18171e+06	0	2.39223e+06	1.37247e+06	0	0	0	5.61653e+06	0	1.65194e+06	1.14478e+06	748393	4.11723e+06	1.25424e+06	1.00134e+07	3.83783e+06	3.54804e+06	1.31489e+06	1.59909e+07	1.36398e+06	1.88869e+06	0	8.09351e+06	4.79071e+06	5.49937e+06	0	2.36459e+07	0	2.414e+06	4.30607e+06	4.54218e+06	4.92501e+06	1.06557e+06	0	0	0	0
Q69YN4	Protein virilizer homolog	VIRMA	VIRMA	GPRTPPGPPPPDDDEDDPVPLPVSGDKEEDAPHR	T184	1xPhospho [T4]	0	763190	1.93895e+06	882429	1.52909e+06	0	1.43781e+06	4.23667e+06	714627	0	1.78465e+06	0	4.96179e+06	0	1.73609e+06	0	1.37733e+06	0	1.3203e+06	3.92952e+06	4.35853e+06	0	969596	0	0	0	2.36238e+06	4.6824e+06	2.56614e+06	727731	2.26718e+06	1.90718e+06	0	1.30004e+06	2.69517e+06	955833	4.44268e+06	0	0	0	6.40476e+06	0	3.77932e+06
Q69YN4	Protein virilizer homolog	VIRMA	VIRMA	GPRTPPGPPPPDDDEDDPVPLPVSGDK	T184	1xPhospho [T4]	0	0	0	0	1.10863e+06	0	0	0	0	0	0	0	64382.6	0	0	153175	227247	0	162131	0	1.05189e+06	0	0	0	0	0	1.5799e+06	2.21178e+06	0	75568.5	0	0	0	274650	0	0	1.33771e+06	1.19262e+06	0	0	0	0	0
Q69YN4	Protein virilizer homolog	VIRMA	VIRMA	HADGEKEDQFNGSPPRPQPR	S173	1xPhospho [S13]	6.46617e+07	7.20594e+07	6.7279e+07	148274335	1.32236e+08	1.08501e+08	1.19505e+08	9.86052e+07	1.10271e+08	1.4151e+08	1.17159e+08	1.06645e+08	8.14051e+07	4.75524e+07	4.83922e+07	110940916	1.37654e+08	1.05272e+08	1.04266e+08	108536531	7.79406e+07	7.89966e+07	6.3535e+07	4.1845e+07	1.15923e+08	8.57109e+07	1.02745e+08	7.55705e+07	6.7683e+07	1.37768e+08	9.45351e+07	9.06864e+07	1.55258e+08	8.3079e+07	1.10848e+08	9.44442e+07	8.59663e+07	7.83232e+07	6.74946e+07	1.02503e+08	7.75314e+07	132773017	1.39597e+08
Q69YN4	Protein virilizer homolog	VIRMA	VIRMA	FFTPPASK	T1708	1xPhospho [T3]	0	0	0	0	0	0	0	0	0	0	0	0	0	0	0	0	0	0	0	0	0	0	0	0	0	0	0	860728	0	0	0	0	0	0	0	285199	0	0	0	0	0	0	0
O15195	Villin-like protein	VILL	VILL	GSQDSSENDLVRSPK	S773	1xPhospho [S13]	688692	0	9.77837e+06	0	3.95621e+06	1.33114e+07	1.11258e+07	2.33147e+06	1.84069e+08	1.61664e+07	1.98123e+06	4.93934e+06	5.69212e+06	0	4.48474e+06	0	1.38805e+07	1.6115e+07	4.12297e+06	8.4808e+06	3.00524e+07	0	420053	0	6.21024e+06	4.04319e+06	3.04484e+06	0	8.06889e+06	0	5.75119e+06	4.9744e+06	6.41212e+07	0	2.82675e+07	848471	0	626614	2.38218e+07	0	0	0	0
O15195	Villin-like protein	VILL	VILL	AATPSKDINQLQK	T238	1xPhospho [T3]	0	0	0	0	3.22955e+06	3.05678e+06	1.45602e+06	974616	1.99877e+07	0	1.74794e+06	0	3.08436e+06	0	0	0	4.54658e+06	5.17437e+06	0	1.85463e+06	7.96036e+06	0	0	0	1.04995e+07	0	2.68047e+06	0	3.45042e+06	0	0	0	0	0	0	0	0	0	6.17564e+06	0	0	0	0
A0A075B6E4	Transcription cofactor vestigial-like protein 4	VGLL4	VGLL4	KFSMEPGDEDLDCDNDHVSK	S59	1xCarbamidomethyl [C13]; 1xPhospho [S3]; 1xOxidation [M4]	0	2.16858e+06	3.96679e+06	4.37127e+06	2.74952e+06	0	0	2.52378e+06	0	0	5.40447e+06	2.50984e+06	2.5835e+06	0	4.10153e+06	4.73693e+06	0	1.94185e+06	0	2.07998e+06	0	0	4.11001e+06	2.41893e+06	0	0	2.0542e+06	1.17509e+06	1.09618e+06	2.54099e+06	1.53356e+06	1.38097e+06	0	0	0	0	0	0	0	0	0	0	2.23415e+06
A0A075B6E4	Transcription cofactor vestigial-like protein 4	VGLL4	VGLL4	KFSMEPGDEDLDCDNDHVSK	S59	1xCarbamidomethyl [C13]; 1xPhospho [S3]	0	2.61043e+06	5.75031e+06	0	0	0	6.62841e+06	5.86708e+06	0	3.07552e+06	4.86024e+06	2.36653e+06	2.55703e+06	0	9.73942e+06	8.48469e+06	1.66721e+06	4.16019e+06	1.8086e+06	4.39523e+06	5.17412e+06	0	8.4969e+06	3.20307e+06	0	2.02864e+06	3.34531e+06	2.57457e+06	0	5.86357e+06	6.22901e+06	1.56813e+06	0	2.20482e+06	0	6.28084e+06	8.01583e+06	2.79566e+06	5.52543e+06	4.26393e+06	4.82403e+06	9.39849e+06	6.46876e+06
A0A075B6E4	Transcription cofactor vestigial-like protein 4	VGLL4	VGLL4	AASLVHADDEKR	S13	1xPhospho [S3]	0	1.01214e+06	5.75875e+06	1.57717e+06	1.43923e+06	0	0	0	0	0	3.18357e+06	0	0	0	1.08426e+06	0	2.1427e+06	0	0	0	1.1957e+06	0	0	548343	0	0	0	0	0	2.22287e+06	0	0	0	0	540998	1.2027e+06	1.66062e+06	0	0	0	0	0	0
A0A075B6E4	Transcription cofactor vestigial-like protein 4	VGLL4	VGLL4	RGQPASPSAHMVSHSHSPSVVS	S274	1xPhospho [S6]	1.96136e+07	5.28241e+06	2.64584e+06	4.48041e+06	1.24721e+07	1.0403e+07	5.91958e+06	9.41273e+06	0	1.19399e+07	1.29349e+07	2.02503e+06	6.90164e+06	1.25127e+07	4.65498e+06	16969172	1.20465e+07	8.036e+06	5.12036e+06	1.70727e+07	8.48664e+06	1.53213e+06	2.05706e+07	1.2983e+07	1.5386e+07	1.29726e+07	8.96519e+06	1.11469e+07	1.96531e+07	1.89641e+07	9.29718e+06	4.85186e+06	0	2.51663e+07	6.07449e+06	1.5636e+07	3.90155e+06	1.26867e+07	8.10308e+06	0	1.40299e+06	0	3.14751e+06
O15240	Neurosecretory protein VGF	VGF	VGF	QNALLFAEEEDGEAGAEDKRSQEETPGHR	S420	1xPhospho [S21]	0	0	0	0	0	0	0	0	0	0	0	0	0	0	0	0	0	8.20919e+06	0	0	0	0	0	0	0	0	0	0	0	0	0	0	0	0	0	0	0	0	0	0	0	0	0
Q9HBM0	Vezatin	VEZT	VEZT	MCYQCESEDEPQADGSGLTTAPPTPR	S696	2xCarbamidomethyl [C2; C5]; 1xPhospho [S7]; 1xOxidation [M1]	0	763886	0	0	0	0	0	1.28031e+06	0	0	0	5.77663e+06	0	0	0	0	0	0	0	0	0	0	1.24523e+06	0	1.2351e+06	0	0	0	0	0	0	0	0	0	0	0	0	0	0	0	0	0	1.00124e+06
Q9HBM0	Vezatin	VEZT	VEZT	TEYLCENSLEGK	S668	1xCarbamidomethyl [C5]; 1xPhospho [S8]	0	0	2.68825e+06	0	0	2.37311e+06	0	779151	0	0	599066	0	0	0	0	0	0	0	0	935877	0	0	0	1.54951e+06	0	4.81794e+06	1.6644e+06	0	0	0	2.61881e+06	0	0	0	0	2.98276e+06	0	0	793669	0	0	0	530567
Q9HBM0	Vezatin	VEZT	VEZT	MCYQCESEDEPQADGSGLTTAPPTPR	S696	2xCarbamidomethyl [C2; C5]; 1xPhospho [S7]	3.24222e+06	1.9203e+06	0	1.23647e+07	0	0	0	631772	0	0	0	0	1.00804e+07	0	1.13218e+06	0	0	0	971160	0	0	0	0	0	0	0	0	0	0	0	0	0	0	0	1.73835e+06	0	0	0	0	0	0	0	0
J3QSH4	Vascular endothelial zinc finger 1	VEZF1	VEZF1	LSHSDEKPFECPICNQR	S188	2xCarbamidomethyl [C11; C14]; 1xPhospho [S4]	0	0	0	0	0	0	0	0	0	0	0	0	0	0	0	0	0	0	0	0	0	0	0	0	0	0	793870	2.93655e+06	0	0	0	0	0	0	0	0	0	0	616114	0	0	0	0
Q14D04	Ventricular zone-expressed PH domain-containing protein homolog 1	VEPH1	VEPH1	SKSLAFHTMLTK	S449	1xPhospho [S3]	0	0	0	0	0	0	565826	814440	0	0	0	0	0	0	538526	0	0	0	0	0	0	0	0	0	0	0	0	0	0	0	0	0	0	0	0	0	0	1.20117e+06	0	0	0	0	659617
Q14D04	Ventricular zone-expressed PH domain-containing protein homolog 1	VEPH1	VEPH1	SQLGESSVSYPNIIHIDSENLSETVK	S509	1xPhospho [S9]	234705	0	256269	0	97346.8	126244	0	0	0	0	0	0	0	0	61031	0	0	0	161303	0	0	0	0	0	108731	0	63806	30523.1	0	0	0	0	0	0	0	0	0	0	0	0	0	0	80474.8
Q14D04	Ventricular zone-expressed PH domain-containing protein homolog 1	VEPH1	VEPH1	SKSLAFHTMLTK	S449	1xPhospho [S3]; 1xOxidation [M9]	0	0	0	0	0	992089	0	0	0	0	0	0	0	0	0	0	0	0	0	0	0	0	0	0	0	0	0	0	0	0	0	0	0	0	0	0	0	0	0	0	0	0	0
Q14D04	Ventricular zone-expressed PH domain-containing protein homolog 1	VEPH1	VEPH1	YSLGQVSKEER	S435	1xPhospho [S7]	0	0	0	640452	0	0	0	0	0	3.73648e+06	0	0	1.06175e+06	3.03142e+06	0	0	0	0	0	0	0	0	0	0	886591	0	0	978309	0	0	0	0	0	0	0	0	0	0	890049	0	0	0	0
A0A0A0MR02	Outer mitochondrial membrane protein porin 2 (Fragment)	VDAC2	VDAC2	LTFDTTFSPNTGK	S115	1xPhospho [S8]	0	0	4.90588e+06	0	893504	2.02435e+06	1.86084e+06	2.1553e+06	0	0	978246	2.46279e+06	0	0	0	0	0	970918	0	1.07082e+06	3.38122e+06	0	0	2.8355e+06	0	0	2.84718e+06	6.21561e+06	5.19339e+06	0	0	1.26747e+06	0	0	2.66941e+06	3.49049e+06	2.50162e+06	0	2.24492e+06	1.76908e+06	2.7923e+06	0	727319
Q96JH7	Deubiquitinating protein VCPIP1	VCPIP1	VCPIP1	GNSVEELEEMDSQDAEMTNTTEPMDHS	S1198	1xPhospho [S3]	182158	2.98798e+06	0	0	114320	1.42945e+06	1.01767e+06	1.27632e+06	0	0	885376	0	0	289404	3.63679e+06	0	0	0	139568	0	47126.8	0	142910	140524	0	247450	0	1.55847e+06	0	0	0	130776	0	0	0	0	0	273990	0	0	1.54059e+06	0	3.97249e+06
Q96JH7	Deubiquitinating protein VCPIP1	VCPIP1	VCPIP1	APYSPTTSK	S768	1xPhospho [S4]	6.90808e+06	4.03695e+06	0	5.05663e+06	5.66163e+06	0	3.49446e+06	8.29288e+06	4.61356e+06	7.20393e+06	4.35006e+06	5.7674e+06	0	9.62346e+06	4.93321e+06	9.61647e+06	9.69473e+06	9.11843e+06	1.21128e+07	1.50407e+07	1.03568e+07	3.59836e+06	1.45199e+07	7.57752e+06	1.7055e+07	9.43707e+06	8.17754e+06	1.26834e+07	11346707	6.29929e+06	7.38677e+06	1.69434e+07	0	9.51607e+06	1.76576e+07	1.26158e+07	1.22667e+07	2.07267e+07	3.86783e+06	1.08808e+07	1.32821e+07	1.65137e+07	1.649e+07
Q96JH7	Deubiquitinating protein VCPIP1	VCPIP1	VCPIP1	SRESSPSHGLLK	S997	2xPhospho [S]	2.91175e+07	2.22984e+07	1.45513e+07	2.10822e+07	2.39185e+07	4.30446e+06	1.83249e+07	3.00924e+07	5.80475e+06	1.45987e+07	2.48348e+07	1.21412e+07	1.49358e+07	1.56903e+07	2.41185e+07	2.12159e+07	1.46226e+07	1.74462e+07	1.0785e+07	2.35605e+07	1.31138e+07	5.13328e+06	2.29775e+07	1.65175e+07	3.57311e+07	2.26249e+07	1.90627e+07	3.22758e+07	2.31123e+07	8.1991e+06	2.38915e+07	3.51328e+07	1.75531e+07	6.37855e+06	1.91948e+07	1.97163e+07	3.12029e+07	3.76068e+07	1.81048e+07	2.45199e+07	3.08353e+07	3.44779e+07	4.13103e+07
Q96JH7	Deubiquitinating protein VCPIP1	VCPIP1	VCPIP1	TVSPSTIR	S747	1xPhospho [S3]	2.59411e+07	2.59021e+07	9.97628e+06	2.65762e+07	2.80272e+07	1.96311e+07	1.96877e+07	2.28927e+07	1.62814e+07	1.61178e+07	2.1606e+07	1.46564e+07	2.18991e+07	1.89345e+07	2.54351e+07	2.34716e+07	2.6078e+07	1.86144e+07	2.97767e+07	2.8961e+07	2.29875e+07	1.19938e+07	2.42531e+07	2.40243e+07	4.01265e+07	2.12112e+07	2.8228e+07	3.15741e+07	2.26237e+07	1.45465e+07	2.01386e+07	3.74553e+07	4.18106e+07	3.11312e+07	3.09942e+07	3.21428e+07	2.76503e+07	3.74616e+07	2.05432e+07	2.18844e+07	3.1273e+07	3.13237e+07	3.24024e+07
P55072	Transitional endoplasmic reticulum ATPase	VCP	VCP;DKFZp434K0126	QTNPSAMEVEEDDPVPEIR	S718	1xPhospho [S5]	6.84899e+06	3.11771e+06	2.46768e+06	4.7453e+06	0	4.73518e+06	0	0	5.0639e+06	0	2.06016e+06	0	0	0	4.35175e+06	1.00489e+06	0	0	0	0	145308	297311	155641	2.7983e+06	625664	137555	2.54843e+06	1.04892e+06	4.56921e+06	1.21188e+06	921460	2.02894e+06	0	1.39286e+06	0	0	0	0	2.84841e+06	0	1.77454e+06	0	1.30186e+06
P55072	Transitional endoplasmic reticulum ATPase	VCP	VCP;DKFZp434K0126	EDEEESLNEVGYDDIGGCR	S197	1xCarbamidomethyl [C18]; 1xPhospho [S6]	0	0	0	0	0	0	0	0	0	0	0	0	0	0	1.15196e+06	0	0	0	0	0	0	2.76836e+06	1.43895e+06	0	1.23546e+06	0	0	1.46859e+06	0	0	0	0	0	0	1.22036e+06	0	0	0	0	0	0	134848	0
P55072	Transitional endoplasmic reticulum ATPase	VCP	VCP;DKFZp434K0126	ERQTNPSAMEVEEDDPVPEIR	T715	1xPhospho [T4]	0	0	0	0	0	0	0	1.34935e+06	0	0	0	0	0	0	2.08534e+06	0	0	0	0	0	0	0	0	0	0	0	0	2.76673e+06	2.20137e+06	0	2.3262e+06	0	0	0	0	0	1.37048e+06	0	0	0	0	0	0
P55072	Transitional endoplasmic reticulum ATPase	VCP	VCP;DKFZp434K0126	LAIRESIESEIR	S702	1xPhospho [S6]	2.73925e+06	4.38691e+06	4.97737e+06	0	5.63214e+06	3.07466e+06	5.04008e+06	5.66328e+06	0	0	5.82809e+06	5.47719e+06	2.22322e+06	0	2.30499e+06	6.3783e+06	6.13937e+06	3.47641e+06	8.90004e+06	5.24533e+06	8.0216e+06	6.1567e+06	4.67037e+06	8.00478e+06	5.70547e+06	4.60336e+06	3.68647e+06	1.25745e+07	5.6175e+06	3.44126e+06	3.49273e+06	3.18315e+06	0	6.4058e+06	1.8727e+06	4.46365e+06	7.03756e+06	6.5336e+06	0	1.34713e+06	5.47619e+06	0	1.87929e+06
P55072	Transitional endoplasmic reticulum ATPase	VCP	VCP;DKFZp434K0126	QTNPSAMEVEEDDPVPEIR	S718	1xPhospho [S5]; 1xOxidation [M7]	1.17732e+06	1.69306e+06	760143	1.16917e+06	1.40634e+06	0	0	1.36519e+06	0	0	0	0	0	0	0	0	0	2.14141e+06	299897	1.4147e+06	1.14198e+06	0	0	1.87779e+06	0	1.0093e+06	1.69789e+06	722759	1.29577e+06	0	0	0	0	5.46521e+06	2.14403e+06	0	771699	0	0	0	0	0	0
P55072	Transitional endoplasmic reticulum ATPase	VCP	VCP;DKFZp434K0126	LAIRESIESEIRR	S702	1xPhospho [S6]	2.1537e+06	1.41632e+06	1.29969e+06	0	4.25923e+06	4.11112e+06	3.79412e+06	2.60653e+06	0	0	1.71608e+06	5.16304e+06	0	0	3.94804e+06	0	2.50623e+06	0	2.3307e+06	2.29253e+06	6.8507e+06	0	2.49666e+06	2.02773e+06	3.49234e+06	0	2.28724e+06	7.69467e+06	6.47141e+06	0	812007	0	0	4.68292e+06	6.94447e+06	3.60727e+06	3.70415e+06	5.19171e+06	6.13213e+06	0	1.60913e+06	0	709998
A0A024QZN4	Metavinculin	VCL	VCL	SLLDASEEAIK	S721	1xPhospho [S1]	0	4.26607e+06	2.79558e+06	4.3945e+06	5.69705e+06	3.18998e+06	3.74871e+06	5.37387e+06	8.53308e+06	0	3.97467e+06	3.90908e+06	1.74275e+06	0	1.67009e+06	3.46493e+06	4.92066e+06	6.67628e+06	0	1.74881e+06	4.69803e+06	3.58613e+06	2.89994e+06	6.87161e+06	5.93134e+06	1.36376e+06	2.22755e+06	820133	2.26618e+06	3.67871e+06	1.41517e+06	1.01475e+06	0	2.94222e+06	1.9075e+07	5.21452e+06	3.83564e+06	1.55324e+06	0	2.74356e+06	5.02543e+06	0	4.17803e+06
A0A024QZN4	Metavinculin	VCL	VCL	NPGNQAAYEHFETMK	Y692	1xPhospho [Y8]; 1xOxidation [M14]	0	0	0	0	0	0	0	0	0	0	0	0	0	0	0	0	0	0	0	0	0	0	0	0	0	0	0	0	0	0	0	0	0	0	0	0	0	693684	0	0	0	0	0
A0A024QZN4	Metavinculin	VCL	VCL	AVAGNISDPGLQK	S809	1xPhospho [S7]	9.18088e+06	7.9627e+06	4.4865e+06	1.53466e+07	1.66299e+07	1.30753e+07	1.36328e+07	6.7004e+06	1.43085e+07	1.17619e+07	8.63844e+06	9.88919e+06	2.01397e+07	1.83128e+07	1.05574e+07	8.3715e+06	8.94334e+06	1.1678e+07	1.9427e+07	5.14378e+06	9.62932e+06	1.51343e+07	8.61314e+06	1.91043e+07	1.19637e+07	0	7.5e+06	1.39159e+06	4.48399e+06	8.72152e+06	5.42524e+06	8.6513e+06	1.39346e+07	9.65225e+06	4.91522e+06	3.87459e+06	3.43006e+06	3.96818e+06	1.17055e+07	1.61258e+07	8.99999e+06	6.3321e+06	9.9921e+06
A0A024QZN4	Metavinculin	VCL	VCL	TISPMVMDAK	S795	1xPhospho [S3]; 2xOxidation [M5; M7]	9.19695e+06	8.98011e+06	3.15865e+07	2.2095e+07	1.52903e+07	2.45529e+07	1.06245e+07	8.33413e+06	1.5265e+07	1.05614e+07	8.27829e+06	9.7154e+06	2.19185e+07	1.45792e+07	2.98079e+06	1.28134e+07	4.04072e+06	8.49681e+06	9.18548e+06	9.69086e+06	6.09446e+06	1.40719e+07	1.22535e+07	1.37375e+07	9.98524e+06	1.82643e+07	1.51293e+07	2.60982e+06	5.4208e+06	9.4982e+06	1.31739e+07	9.0904e+06	2.77561e+07	1.26311e+07	6.48387e+06	4.57228e+06	2.39654e+06	4.3789e+06	1.57178e+07	2.55315e+07	2.67613e+07	3.10667e+07	3.58215e+07
A0A024QZN4	Metavinculin	VCL	VCL	GWLRDPSASPGDAGEQAIR	S288	2xPhospho [S7; S9]	2.88791e+06	0	0	979442	1.24564e+06	0	1.75881e+06	1.83543e+06	0	0	1.18955e+06	0	0	356564	0	1.66253e+06	1.13443e+06	1.26645e+06	0	2.39521e+06	0	0	922529	0	801877	3.65227e+06	0	0	0	0	595375	2.47892e+06	305180	3.22644e+06	2.45913e+06	1.35883e+06	1.08822e+06	883381	0	0	0	0	808575
A0A024QZN4	Metavinculin	VCL	VCL	GWLRDPSASPGDAGEQAIR	S290	2xPhospho [S7; S9]	2.88791e+06	0	0	979442	1.24564e+06	0	1.75881e+06	1.83543e+06	0	0	1.18955e+06	0	0	356564	0	1.66253e+06	1.13443e+06	1.26645e+06	0	2.39521e+06	0	0	922529	0	801877	3.65227e+06	0	0	0	0	595375	2.47892e+06	305180	3.22644e+06	2.45913e+06	1.35883e+06	1.08822e+06	883381	0	0	0	0	808575
A0A024QZN4	Metavinculin	VCL	VCL	NPGNQAAYEHFETMK	Y692	1xPhospho [Y8]	1.595e+06	0	0	670105	0	644013	600564	547935	0	0	910180	0	0	1.78728e+06	713005	0	0	0	959680	605026	0	1.01713e+06	0	0	0	0	0	0	0	0	532090	815917	0	0	0	0	0	0	0	0	0	0	972925
A0A024QZN4	Metavinculin	VCL	VCL	TDAGFTLR	T1055	1xPhospho [T6]	5.20752e+06	7.67112e+06	3.51383e+06	7.54485e+06	4.50634e+06	1.53539e+07	4.34686e+06	4.78058e+06	1.65713e+07	2.01486e+07	9.3743e+06	1.06868e+07	6.36593e+06	0	6.8593e+06	0	0	1.25161e+07	0	0	8.55507e+06	9.17387e+06	3.86681e+06	7.41757e+06	3.31525e+06	1.75114e+07	7.7141e+06	1.37973e+06	0	0	1.38088e+07	0	0	3.08306e+06	7.95796e+06	9.41302e+06	9.87096e+06	3.78159e+06	6.49818e+06	7.99178e+06	4.15604e+06	2.92936e+06	6.55851e+06
A0A024QZN4	Metavinculin	VCL	VCL	ALASIDSK	S272	1xPhospho [S4]	0	1.65358e+07	1.34896e+07	1.49348e+07	4.42471e+07	1.426e+07	6.37651e+06	6.55816e+06	3.90936e+07	1.14468e+07	1.2283e+07	7.26228e+06	1.6984e+07	2.52319e+07	6.20094e+06	1.27058e+07	2.20721e+07	1.93481e+07	1.10005e+07	1.01841e+07	2.9445e+07	2.7955e+07	1.01181e+07	4.27178e+07	1.39446e+07	6.53717e+06	6.28081e+06	0	1.07963e+07	1.01835e+07	5.09044e+06	1.28761e+07	0	7.90126e+06	8.26577e+06	9.33903e+06	1.99622e+06	4.33948e+06	4.69327e+06	7.71161e+06	0	6.9028e+06	1.71979e+07
A0A024QZN4	Metavinculin	VCL	VCL	KWSSKGNDIIAAAK	S913	1xPhospho [S3]	0	0	0	0	0	2.19529e+06	0	0	0	0	0	0	0	0	0	0	0	0	0	0	0	0	0	0	0	0	0	0	0	0	0	0	0	0	0	1.68012e+06	0	0	2.70554e+06	0	0	0	0
A0A024QZN4	Metavinculin	VCL	VCL	IPTISTQLK	T990	1xPhospho [T3]	0	0	0	0	0	0	0	0	0	0	0	0	0	0	0	0	0	0	0	0	0	0	0	0	0	0	0	0	0	0	0	0	0	0	0	459287	0	0	0	0	0	0	0
P52735	Guanine nucleotide exchange factor VAV2	VAV2	VAV2	KSGYFPSSSVKPCPVDGRPPISRPPSR	S663	1xCarbamidomethyl [C13]; 1xPhospho [S26]	0	0	0	0	0	2.49222e+06	1.53872e+06	0	0	0	917837	0	0	0	0	0	0	0	0	0	0	0	0	0	0	0	0	0	0	0	0	0	0	0	0	0	0	0	0	0	0	0	0
P52735	Guanine nucleotide exchange factor VAV2	VAV2	VAV2	SGYFPSSSVKPCPVDGRPPISRPPSR	S663	1xCarbamidomethyl [C12]; 1xPhospho [S25]	0	0	1.63564e+06	0	1.03131e+06	5.26442e+06	2.58773e+06	0	0	0	1.73056e+06	0	0	0	0	0	0	0	0	0	3.84335e+06	0	0	1.22621e+06	0	0	0	0	0	0	0	0	0	0	0	865925	0	0	0	0	0	0	0
A0A0S2Z4I7	Vasodilator-stimulated phosphoprotein isoform 4 (Fragment)	VASP	VASP	ATQVGEKTPKDESANEEPEAR	T193	1xPhospho [T8]	0	1.66423e+06	1.99077e+06	3.19608e+06	955513	0	0	3.12525e+06	0	2.75296e+06	1.87045e+06	0	0	0	1.19392e+06	2.47251e+06	3.35771e+06	3.63537e+06	0	0	1.61629e+06	2992658	0	0	1.82897e+06	0	3.74716e+06	0	4.17007e+06	2.15203e+06	3.41497e+06	0	0	0	0	2.5709e+06	0	4.51105e+06	2.74292e+06	0	0	0	0
A0A0S2Z4N8	Vasodilator-stimulated phosphoprotein isoform 2 (Fragment)	VASP	VASP	VSKQEEASGGPTAPK	S187	1xPhospho [S2]	0	0	5.50557e+07	0	78830.1	2.10062e+07	0	0	0	1.41285e+06	2.20143e+06	1.47833e+06	4.92543e+07	4.31956e+06	0	0	0	0	0	0	2.08342e+06	3.97999e+06	0	2.53207e+06	351703	2.84704e+06	0	0	0	0	1.86278e+06	0	1.31453e+06	0	0	59304.2	0	0	0	0	0	0	0
A0A0S2Z4N8	Vasodilator-stimulated phosphoprotein isoform 2 (Fragment)	VASP	VASP	QQPGPSEHIER	S149	1xPhospho [S6]	3.06076e+06	0	2.93921e+06	0	1.25148e+06	0	974630	640021	0	0	0	0	0	0	0	0	1.74556e+06	1.29476e+06	0	0	828613	781152	0	0	0	0	0	0	0	0	0	0	0	0	2.50629e+06	3.24265e+06	0	0	0	0	0	0	0
Q53XM7	VAMP (Vesicle-associated membrane protein)-associated protein B and C	VAPB	VAPB	KTVQSNSPISALAPTGK	S206	1xPhospho [S7]	0	0	1.96657e+06	0	0	0	1.99666e+06	0	0	0	0	0	0	0	0	2.10701e+06	0	0	0	2.89141e+06	0	4.71101e+06	1.43867e+06	1.5203e+06	1.18237e+06	1.8506e+06	1.36098e+06	0	0	0	0	0	0	0	0	0	0	0	0	0	0	0	0
Q53XM7	VAMP (Vesicle-associated membrane protein)-associated protein B and C	VAPB	VAPB	IISTTASKTETPIVSK	T144	2xPhospho [T5; T9]	0	0	0	0	0	0	0	0	0	0	958620	0	0	0	0	0	0	0	0	0	0	0	0	0	0	0	0	0	0	0	0	0	0	0	0	0	0	0	0	0	0	0	0
Q53XM7	VAMP (Vesicle-associated membrane protein)-associated protein B and C	VAPB	VAPB	IISTTASKTETPIVSK	T148	2xPhospho [T5; T9]	0	0	0	0	0	0	0	0	0	0	958620	0	0	0	0	0	0	0	0	0	0	0	0	0	0	0	0	0	0	0	0	0	0	0	0	0	0	0	0	0	0	0	0
Q9P0L0	Vesicle-associated membrane protein-associated protein A	VAPA	VAPA	AVPLNASKQDGPMPKPHSVSLNDTETR	S153	1xPhospho [S7]	0	0	2.50294e+06	0	0	0	0	0	0	0	1.02634e+06	0	0	0	0	0	0	0	0	0	2.00932e+06	0	0	0	0	0	0	0	1.86691e+06	0	0	0	0	0	0	0	0	0	1.60149e+06	0	0	0	2.08174e+06
Q9P0L0	Vesicle-associated membrane protein-associated protein A	VAPA	VAPA	AVPLNASKQDGPMPKPHSVSLNDTETR	S153	1xPhospho [S7]; 1xOxidation [M13]	0	0	3.6298e+06	0	740471	0	0	532807	0	0	0	0	0	0	0	0	0	0	0	0	0	0	0	0	0	0	0	0	0	0	0	0	0	0	0	0	0	0	2.15541e+06	0	0	0	0
Q8TAA9	Vang-like protein 1	VANGL1	VANGL1	RDSSHNELYYEEAEHERR	S338	1xPhospho [S3]	0	0	0	0	1.46844e+07	2.03203e+07	1.35747e+07	2.50603e+07	9.7037e+06	2.37669e+07	1.46822e+07	1.57716e+07	3.01398e+06	2.4334e+07	1.64531e+07	0	0	0	2.0142e+07	0	3.40559e+06	0	0	0	0	1.61186e+07	0	0	0	1.79301e+07	1.58531e+07	0	2.63143e+07	0	0	1.20392e+07	0	0	0	1.9948e+07	1.49532e+07	2.00727e+07	1.53747e+07
Q9BV40	Vesicle-associated membrane protein 8	VAMP8	VAMP8	NKTEDLEATSEHFK	T48	2xPhospho [T3; T/S]	0	4.39837e+06	6.49992e+06	6.96265e+06	3.04225e+06	1.05791e+07	3.8806e+06	0	3.11748e+07	8.03365e+06	3.58898e+06	8.4221e+06	0	6.44913e+06	7.77863e+06	1.53226e+07	5.7745e+06	0	4.96697e+06	0	4.02327e+06	6.74011e+06	0	0	7.27777e+06	0	1.57479e+06	792326	997889	4.52708e+06	0	0	0	3.85173e+06	4.47704e+06	0	0	0	5.0305e+06	5.11615e+06	1.60847e+06	4.09365e+06	3.22101e+06
Q9BV40	Vesicle-associated membrane protein 8	VAMP8	VAMP8	NLQSEVEGVK	S18	1xPhospho [S4]	6.76165e+06	1.52482e+07	4.31036e+07	6.80982e+06	7.63134e+06	8.78331e+06	7.52703e+06	6.93435e+06	8.90499e+06	5.44494e+06	1.37338e+07	9.30046e+06	4.01937e+06	0	3.76046e+06	3.0161e+06	7.98935e+06	3.31801e+06	0	8.668e+06	1.24184e+07	0	1.41088e+06	1.5444e+06	1.30248e+06	3.96567e+06	7.55857e+06	7.32912e+06	2.23488e+06	1.30702e+07	3.39475e+06	0	0	1.77632e+06	4.17049e+06	1.35068e+07	1.34985e+07	5.71875e+06	4.87967e+06	9.63786e+06	9.60014e+06	1.28952e+07	1.41414e+07
Q9BV40	Vesicle-associated membrane protein 8	VAMP8	VAMP8	MEEASEGGGNDR	S5	1xAcetyl [N-Term]; 1xPhospho [S5]	1.38862e+06	1.19072e+06	0	0	0	1.17623e+06	0	1.22969e+06	1.37191e+06	0	0	0	5.99173e+06	0	0	0	0	0	0	1.38016e+06	1.70306e+06	0	954516	2.41561e+06	0	3.03543e+06	793995	1.65935e+06	0	0	3.9483e+06	2.09938e+06	0	0	1.47425e+06	1.5449e+06	2.28336e+06	0	0	3.72983e+06	2.89396e+06	4.56818e+06	3.98913e+06
Q9BV40	Vesicle-associated membrane protein 8	VAMP8	VAMP8	NIMTQNVER	T28	1xPhospho [T4]; 1xOxidation [M3]	0	0	1.28834e+06	0	0	0	0	0	0	0	0	0	0	0	0	0	0	0	0	0	0	0	0	0	0	0	1.29392e+06	0	0	0	0	0	0	0	0	0	0	0	0	0	0	0	0
O75379	Vesicle-associated membrane protein 4	VAMP4	VAMP4	NLLEDDSDEEEDFFLR	S30	1xPhospho [S7]	5.55436e+06	7.78968e+06	1.23638e+07	2.32317e+06	265211	108640	559040	855455	2.06139e+06	0	333704	1.16421e+06	766406	0	3.03506e+06	314362	283558	1.25882e+06	138260	502070	0	278845	156421	470464	450827	331591	552941	571206	308069	974987	772482	1.38823e+06	0	251537	3.71183e+06	1.12174e+06	1.38377e+06	577033	1.76447e+06	4.49314e+06	0	821117	3.70856e+06
O75379	Vesicle-associated membrane protein 4	VAMP4	VAMP4	RNLLEDDSDEEEDFFLR	S30	1xPhospho [S8]	2.38547e+06	4.88786e+06	5.03192e+06	3.59979e+06	1.59263e+06	592307	1.31458e+06	2.23221e+06	1.44259e+06	3.00277e+06	501059	83988.2	216418	429336	3.34146e+06	1.13688e+06	278029	0	1.49411e+06	177846	436939	2.33633e+06	536285	108093	0	267667	1.15619e+06	1.95064e+06	1.98182e+06	736672	551100	382297	0	1.12975e+06	1.46088e+06	992964	809962	1.38034e+06	1.24481e+06	2.61146e+06	333636	5.73013e+06	2.11024e+06
O75379	Vesicle-associated membrane protein 4	VAMP4	VAMP4	HLNDDDVTGSVKSER	S17	1xPhospho [S10]	0	0	0	0	0	0	886897	0	0	0	1.00323e+06	0	0	0	1.26329e+06	0	0	0	0	0	0	0	0	0	0	0	1.41967e+06	0	0	0	0	0	0	0	0	0	0	0	1.2801e+06	0	0	0	0
Q15836	Vesicle-associated membrane protein 3	VAMP3	VAMP1;VAMP3;VAMP2	LQQTQNQVDEVVDIMR	T18	1xPhospho [T4]; 1xOxidation [M15]	2.82323e+06	0	3.89394e+06	0	0	0	0	0	0	0	3.69709e+06	0	0	0	0	150388	239205	1.339e+06	0	1.41814e+06	1.02103e+06	0	0	0	1.79546e+06	0	800556	1.79086e+06	0	0	0	0	0	0	866120	3.01794e+06	0	0	1.392e+06	0	0	0	1.09056e+06
Q15836	Vesicle-associated membrane protein 3	VAMP3	VAMP1;VAMP3;VAMP2	LQQTQNQVDEVVDIMR	T18	1xPhospho [T4]	266995	0	0	480154	0	281455	0	300456	477837	0	0	1.53175e+06	185690	0	659528	391797	178759	293478	185276	0	0	203170	0	0	374061	0	116039	0	0	0	152505	0	0	222159	0	197098	445099	224140	623800	0	357222	0	396533
J3QRU4	Synaptobrevin-2	VAMP2	VAMP1;VAMP3;VAMP2	LQQTQAQVDEVVDIMR	T35	1xPhospho [T4]; 1xOxidation [M15]	2.37655e+06	0	1.25461e+06	0	328934	0	3.19927e+06	0	0	0	2.3739e+06	1.95573e+06	0	0	0	0	141269	0	0	0	0	0	0	0	0	0	0	0	0	260845	0	0	0	0	0	1.61498e+06	0	0	0	0	0	0	0
J3QRU4	Synaptobrevin-2	VAMP2	VAMP1;VAMP3;VAMP2	LQQTQAQVDEVVDIMR	T35	1xPhospho [T4]	0	0	0	0	0	0	0	0	0	0	0	0	0	0	0	0	0	139186	115635	0	0	0	0	0	0	0	0	0	0	0	0	0	0	0	0	0	0	0	72898.1	0	0	0	0
J3QRU4	Synaptobrevin-2	VAMP2	VAMP1;VAMP3;VAMP2	LSELDDRADALQAGASQFETSAAK	S75	1xPhospho [S16]	7.91284e+06	1.51058e+07	5.6603e+07	5.6152e+06	1.68436e+07	1.01198e+08	2.6268e+07	7.04885e+06	8.6613e+06	0	1.94923e+07	2.33415e+07	0	0	1.38843e+07	0	66470.1	1.03617e+07	122666	3.08804e+06	9.61765e+06	0	4.37115e+06	1.14965e+07	5.4121e+06	0	1.0499e+07	3.41277e+06	3.97394e+06	1.45164e+07	4.13787e+06	0	0	80940.9	0	2.59925e+07	0	3.20859e+06	4.36189e+07	1.25528e+07	0	0	8.12374e+06
J3QRU4	Synaptobrevin-2	VAMP2	VAMP1;VAMP3;VAMP2	DQKLSELDDRADALQAGASQFETSAAK	S61	2xPhospho [S5; S19]	0	0	2.54849e+06	0	1.97464e+06	0	0	831328	0	0	0	0	55878.2	0	0	112449	0	2.96842e+06	223913	2.29972e+06	3.63513e+06	0	353210	0	0	0	2.15713e+06	874614	4.76443e+06	0	179733	62695.2	0	0	0	1.48481e+06	0	134047	0	0	0	0	1.04014e+06
J3QRU4	Synaptobrevin-2	VAMP2	VAMP1;VAMP3;VAMP2	DQKLSELDDRADALQAGASQFETSAAK	S75	2xPhospho [S5; S19]	0	0	2.54849e+06	0	1.97464e+06	0	0	831328	0	0	0	0	55878.2	0	0	112449	0	2.96842e+06	223913	2.29972e+06	3.63513e+06	0	353210	0	0	0	2.15713e+06	874614	4.76443e+06	0	179733	62695.2	0	0	0	1.48481e+06	0	134047	0	0	0	0	1.04014e+06
J3QRU4	Synaptobrevin-2	VAMP2	VAMP1;VAMP3;VAMP2	DQKLSELDDRADALQAGASQFETSAAK	S61	1xPhospho [S5]	1.02754e+06	4.24684e+06	2.38847e+07	3.95325e+06	2.34517e+06	3.19148e+07	2.19493e+07	8.51434e+06	3.8154e+06	870142	1.27975e+07	3.72266e+07	173557	1.28139e+06	9.80245e+06	0	250317	1.81405e+06	496765	3.99201e+06	4.29348e+06	0	73614.2	1.20077e+06	111870	0	8.29482e+06	4.6815e+06	1.42834e+07	604436	0	1.04334e+06	0	184738	5.21265e+06	1.17594e+07	4.25013e+06	809008	2.12666e+07	1.91864e+07	5.54401e+06	0	4.46047e+06
J3QRU4	Synaptobrevin-2	VAMP2	VAMP1;VAMP3;VAMP2	DQKLSELDDR	S61	1xPhospho [S5]	7.47972e+07	3.623e+07	1.76447e+08	4.02278e+07	3.17718e+07	4.04789e+07	6.2701e+07	3.51495e+07	3.63054e+07	7.97619e+07	5.7138e+07	68973663	1.57983e+07	4.48283e+07	3.94477e+07	4.79745e+07	4.58373e+07	3.14226e+07	5.36843e+07	2.49377e+07	2.33628e+07	5.51494e+06	2.04571e+07	1.17045e+07	2.84699e+07	1.45207e+07	6.30151e+07	1.73047e+07	2.37409e+07	5.89371e+07	3.93197e+07	1.25234e+07	8.75104e+07	1.15957e+07	2.20755e+07	4.015e+07	5.07027e+07	2.44792e+07	1.9513e+07	3.48167e+07	1.58069e+07	2.86804e+07	2.04493e+07
J3QRU4	Synaptobrevin-2	VAMP2	VAMP1;VAMP3;VAMP2	ADALQAGASQFETSAAK	S75	2xPhospho [S9; S14]	0	1.41815e+06	757624	0	0	0	0	0	0	101119	0	0	0	0	0	0	0	847461	1.49003e+06	0	1.11086e+06	0	0	0	0	0	0	0	1.55802e+06	2.37894e+06	0	1.2213e+06	0	1.60339e+06	0	0	0	0	0	0	0	0	0
J3QRU4	Synaptobrevin-2	VAMP2	VAMP1;VAMP3;VAMP2	ADALQAGASQFETSAAK	S80	2xPhospho [S9; S14]	0	1.41815e+06	757624	0	0	0	0	0	0	101119	0	0	0	0	0	0	0	847461	1.49003e+06	0	1.11086e+06	0	0	0	0	0	0	0	1.55802e+06	2.37894e+06	0	1.2213e+06	0	1.60339e+06	0	0	0	0	0	0	0	0	0
B7ZKN5	UTX protein	UTX	UTX;KDM6A;DKFZp451J023	TDNSVASSPSSAISTATPSPK	S881	2xPhospho [S/T]	0	0	0	6.70224e+06	0	0	3.48622e+06	1.78806e+06	0	0	0	0	1.14738e+07	0	1.3699e+06	0	3.27583e+06	6.4468e+06	3.38059e+06	1.64817e+06	1.69052e+06	0	0	1.3028e+06	2.01716e+06	3.1396e+06	1.9614e+06	1.83275e+06	1.60468e+06	1.20601e+07	0	0	2.15832e+06	0	0	691701	2.08262e+06	0	0	2.00221e+06	2.029e+06	0	1.47828e+06
B7ZKN5	UTX protein	UTX	UTX;KDM6A;DKFZp451J023	TNLTSSAEEPWK	S679	1xPhospho [S6]	0	0	1.22198e+06	0	0	0	0	0	0	0	1.17377e+06	0	0	0	0	0	0	641895	0	0	0	0	707184	0	0	0	0	0	0	903064	0	505596	0	0	0	1.42827e+06	650483	375782	0	0	945962	1.81437e+06	0
P46939	Utrophin	UTRN	UTRN	KECEEEAINIQSTAPEEEHESPR	S295	1xCarbamidomethyl [C3]; 1xPhospho [S21]	7.22346e+06	0	6.34561e+06	0	2.13882e+06	1.42846e+06	0	0	0	0	2.74056e+06	2.22963e+06	1.75446e+06	0	1.32375e+06	4.39327e+06	7.39933e+06	5.08878e+06	4.38532e+06	1.42464e+07	0	3.22099e+06	4.37042e+06	9.81055e+06	3.72291e+06	4.65791e+07	7.43348e+06	799407	998627	0	1.37954e+06	0	0	0	0	0	0	0	2.46489e+06	0	0	0	1.85306e+06
P46939	Utrophin	UTRN	UTRN	HLESSDEDEKMDEESAQIEEVLQR	S1795	2xPhospho [S4; S5]	0	0	0	0	0	0	0	0	3.28689e+06	0	49983.2	0	56000.3	0	0	0	0	117774	0	48610.5	0	0	0	0	0	0	0	0	0	84955.8	0	0	0	0	0	0	0	0	0	0	0	0	0
P46939	Utrophin	UTRN	UTRN	HLESSDEDEKMDEESAQIEEVLQR	S1796	2xPhospho [S4; S5]	0	0	0	0	0	0	0	0	3.28689e+06	0	49983.2	0	56000.3	0	0	0	0	117774	0	48610.5	0	0	0	0	0	0	0	0	0	84955.8	0	0	0	0	0	0	0	0	0	0	0	0	0
P46939	Utrophin	UTRN	UTRN	ECEEEAINIQSTAPEEEHESPR	S295	1xCarbamidomethyl [C2]; 1xPhospho [S20]	0	0	0	0	4.71045e+06	4.08779e+06	2.74576e+06	1.67864e+06	6.21675e+06	6.56811e+06	2.76592e+06	6.4351e+06	5.1796e+06	0	0	4.84747e+06	3.09349e+06	0	1.2902e+07	2.10392e+06	0	0	2.55639e+06	2.41725e+06	0	3.07579e+06	1.06125e+06	2.23523e+06	0	0	2.14953e+06	0	0	1.76401e+06	2.62374e+06	0	0	0	0	0	1.19367e+07	0	7.8381e+06
P46939	Utrophin	UTRN	UTRN	SKQELPPPPPPK	S667	1xPhospho [S1]	1.37596e+06	0	1.21532e+06	0	1.51944e+06	2.4133e+06	1.03252e+06	0	1.61486e+06	2.77819e+06	1.70071e+06	2.9758e+06	0	4.59361e+06	0	0	0	0	1.5217e+06	1.2995e+06	0	0	0	0	0	810894	1.43577e+06	0	0	1.93967e+06	1.55004e+06	0	0	0	0	523990	0	1.42428e+06	1.32342e+06	0	944076	0	1.99959e+06
P46939	Utrophin	UTRN	UTRN	ENALQDSILAR	S2482	1xPhospho [S7]	6.91237e+06	1.81769e+07	4.58824e+07	1.59692e+07	9.7313e+06	6.14623e+06	1.02752e+07	2.67554e+07	1.38855e+07	0	9.83449e+06	2.89258e+06	0	0	5.27294e+06	0	1.37033e+07	9.97587e+06	4.90451e+06	1.26063e+07	7.58855e+06	7.18885e+06	8.76659e+06	9.31674e+06	4.39189e+06	1.06855e+07	1.75786e+07	4.43982e+07	0	9.52695e+06	1.67638e+07	7.20111e+06	0	2.92764e+06	2.37391e+07	3.97099e+07	3.59733e+07	2.31504e+07	5.03524e+06	0	0	0	921126
P46939	Utrophin	UTRN	UTRN	NVSQHLEDLER	S784	1xPhospho [S3]	3.21721e+06	5.56186e+06	1.44533e+06	6.67213e+06	9.31196e+06	7.67151e+06	5.94409e+06	7.37995e+06	10329173	1.27139e+07	1.00941e+07	6.94311e+06	9.29552e+06	9.85391e+06	5.44195e+06	7.48614e+06	7.44123e+06	5.67746e+06	9.78978e+06	7.2322e+06	9.28213e+06	3.45415e+06	2.91376e+07	1.56583e+06	5.20619e+06	5.65865e+06	6.53282e+06	5.88259e+06	3.78729e+06	1.05335e+07	2.51084e+06	2.80033e+06	7.76333e+06	6.41383e+06	874801	4.38703e+06	4.06051e+06	915924	4.2985e+06	1.27938e+07	6.97464e+06	6.97038e+06	7.44379e+06
P46939	Utrophin	UTRN	UTRN	QSLPSLKDSCQR	S840	1xCarbamidomethyl [C10]; 1xPhospho [S9]	0	0	0	0	0	0	0	0	2.68128e+06	0	0	4.38208e+06	0	0	3.55265e+06	0	5.81765e+06	0	5.46449e+06	1.28506e+06	0	6.91874e+06	0	0	4.0064e+06	0	0	0	2.39863e+06	0	0	0	0	0	0	0	0	921337	2.00859e+06	0	0	0	0
P46939	Utrophin	UTRN	UTRN	DLLETVRVR	T655	1xPhospho [T5]	0	0	0	0	0	0	0	0	0	0	0	0	0	0	0	0	0	0	0	0	0	0	0	0	0	0	0	0	0	0	0	0	0	0	0	0	0	0	0	0	0	0	0
P46939	Utrophin	UTRN	UTRN	QSLPSLK	S833	1xPhospho [S2]	5.85411e+06	3.37684e+06	6.88566e+06	5.79689e+06	5.95328e+06	3.53981e+06	4.969e+06	4.2471e+06	8.7617e+06	6.95358e+06	5.34535e+06	8.2839e+06	8.98106e+06	0	4.34232e+06	7.59985e+06	7.78216e+06	6.31843e+06	9.31639e+06	4.99354e+06	8.12064e+06	0	2.65318e+06	4.86509e+06	7.92797e+06	4.24019e+06	5.02665e+06	4.1223e+06	4.71566e+06	6.5477e+06	2.31942e+06	6.07787e+06	0	3.66015e+06	4.78282e+06	3.19616e+06	5.54762e+06	1.90296e+06	2.75789e+06	8.61058e+06	8.87413e+06	1.8945e+06	6.95162e+06
P46939	Utrophin	UTRN	UTRN	DLLETVR	T655	1xPhospho [T5]	0	0	1.49166e+06	0	0	0	0	0	0	0	0	1.64648e+06	0	0	0	0	0	0	0	0	0	0	0	0	0	0	0	0	0	0	0	0	0	0	0	0	0	0	0	0	0	0	0
Q9NQZ2	Something about silencing protein 10	UTP3	UTP3	TSAAACAVTDLSDDSDFDEK	S368	1xCarbamidomethyl [C6]; 2xPhospho [S/T]	2.00933e+06	3.52474e+06	2.20951e+06	1.73855e+06	0	0	3.77811e+06	4.93492e+06	0	0	1.9125e+06	0	0	269756	0	2.31449e+06	0	1.84087e+06	262407	4.37262e+06	0	0	2.33719e+06	2.69275e+06	0	4.3283e+06	1.22395e+06	7.53279e+06	1.87193e+06	0	4.63975e+06	2.82348e+06	388936	0	1.25535e+06	684544	3.17335e+06	0	0	2.32339e+06	0	6.58903e+06	4.09802e+06
O75691	Small subunit processome component 20 homolog	UTP20	UTP20	SLSDNGQPGTPDPADSGGTSAK	T1741	1xPhospho [T10]	0	4.99309e+06	5.21905e+06	6.42906e+06	1.03486e+07	3.77572e+06	1.05263e+07	1.62773e+07	0	1.41982e+07	1.02403e+07	4.26702e+06	1.76334e+07	0	3.08094e+06	1.29148e+07	0	8.79339e+06	3.7122e+06	1.7545e+07	5.44782e+06	7.21294e+06	9.28154e+06	9.58536e+06	6.33808e+06	1.19488e+07	1.10163e+07	1.15354e+07	6.93322e+06	1.07864e+07	2.42627e+07	1.42842e+07	0	2.0616e+06	1.18818e+07	5.25092e+06	8.21121e+06	1.5878e+07	9.39282e+06	0	3.11129e+06	8.55204e+06	8.82548e+06
O75691	Small subunit processome component 20 homolog	UTP20	UTP20	SVGDESWEQTQEGDVGALYHEQLALK	S788	1xPhospho [S6]	724962	160837	0	830495	0	0	176772	715768	0	0	101638	0	0	785152	0	0	189964	127754	0	97688.6	0	0	0	0	0	79564.9	114639	1.93418e+06	115819	117854	0	103026	0	594306	0	0	37606.6	0	0	0	87899.2	0	562591
Q9Y5J1	U3 small nucleolar RNA-associated protein 18 homolog	UTP18	UTP18	VQEHEDSGDSEVENEAK	S121	2xPhospho [S7; S10]	19272508	1.69808e+07	2.85833e+07	1.99673e+07	1.23016e+07	1.53361e+06	2.86965e+07	3.28505e+07	1.71998e+06	1.07655e+07	3.85888e+07	1.93962e+07	9.28292e+07	4.84898e+06	7.44395e+06	1.9111e+07	9.7754e+06	1.1329e+07	5.91695e+06	4.54802e+07	1.42396e+07	1.07288e+07	2.15515e+07	8.34509e+06	1.63357e+07	4.8773e+07	1.5531e+07	5.44477e+07	2.06835e+07	7.55255e+06	3.33864e+07	4.09667e+07	0	1.63563e+07	1.52021e+07	9.3353e+06	4.84051e+07	3.1132e+07	1.97048e+07	6.15854e+07	5.29499e+07	1.4739e+08	6.78319e+07
Q9Y5J1	U3 small nucleolar RNA-associated protein 18 homolog	UTP18	UTP18	VQEHEDSGDSEVENEAK	S124	2xPhospho [S7; S10]	19272508	1.69808e+07	2.85833e+07	1.99673e+07	1.23016e+07	1.53361e+06	2.86965e+07	3.28505e+07	1.71998e+06	1.07655e+07	3.85888e+07	1.93962e+07	9.28292e+07	4.84898e+06	7.44395e+06	1.9111e+07	9.7754e+06	1.1329e+07	5.91695e+06	4.54802e+07	1.42396e+07	1.07288e+07	2.15515e+07	8.34509e+06	1.63357e+07	4.8773e+07	1.5531e+07	5.44477e+07	2.06835e+07	7.55255e+06	3.33864e+07	4.09667e+07	0	1.63563e+07	1.52021e+07	9.3353e+06	4.84051e+07	3.1132e+07	1.97048e+07	6.15854e+07	5.29499e+07	1.4739e+08	6.78319e+07
Q9Y5J1	U3 small nucleolar RNA-associated protein 18 homolog	UTP18	UTP18	TSSDDESEEDEDDLLQR	S206	2xPhospho [S3; S7]	0	2.33071e+06	2.06759e+06	0	0	0	1.78285e+06	0	0	214992	0	0	0	0	0	1.70544e+06	0	1.24866e+06	0	1.97528e+06	1.45329e+06	0	1.64871e+06	0	0	1.62398e+06	3.11846e+06	1.42092e+06	0	0	0	1.90038e+06	329088	0	0	1.91201e+06	2.84444e+06	0	0	0	0	0	0
Q9Y5J1	U3 small nucleolar RNA-associated protein 18 homolog	UTP18	UTP18	TSSDDESEEDEDDLLQR	S210	2xPhospho [S3; S7]	0	2.33071e+06	2.06759e+06	0	0	0	1.78285e+06	0	0	214992	0	0	0	0	0	1.70544e+06	0	1.24866e+06	0	1.97528e+06	1.45329e+06	0	1.64871e+06	0	0	1.62398e+06	3.11846e+06	1.42092e+06	0	0	0	1.90038e+06	329088	0	0	1.91201e+06	2.84444e+06	0	0	0	0	0	0
Q9BVJ6	U3 small nucleolar RNA-associated protein 14 homolog A	UTP14A	UTP14A	RSELSQDAEPAGSQETK	S437	1xPhospho [S5]	0	0	3.00159e+06	0	0	0	0	0	0	0	2.10357e+06	0	0	0	0	0	0	0	0	0	0	0	0	0	0	0	0	0	0	0	0	0	0	0	0	0	0	0	0	0	0	0	0
Q9BVJ6	U3 small nucleolar RNA-associated protein 14 homolog A	UTP14A	UTP14A	EAATQEDPEQLPELEAHGVSESEGEERPVAEEEILLR	S405	2xPhospho [S20; S22]	1.11837e+06	849185	2.1175e+06	622010	296979	767139	1.64501e+06	2.29969e+06	0	917981	329429	509521	0	0	0	0	395298	231588	0	869311	181960	0	135570	260126	140570	1.05424e+06	240243	744980	337270	0	442195	84096.7	0	251397	214812	748407	846231	1.00833e+06	453316	0	0	2.57507e+06	786620
Q9BVJ6	U3 small nucleolar RNA-associated protein 14 homolog A	UTP14A	UTP14A	EAATQEDPEQLPELEAHGVSESEGEERPVAEEEILLR	S407	2xPhospho [S20; S22]	1.11837e+06	849185	2.1175e+06	622010	296979	767139	1.64501e+06	2.29969e+06	0	917981	329429	509521	0	0	0	0	395298	231588	0	869311	181960	0	135570	260126	140570	1.05424e+06	240243	744980	337270	0	442195	84096.7	0	251397	214812	748407	846231	1.00833e+06	453316	0	0	2.57507e+06	786620
Q9BVJ6	U3 small nucleolar RNA-associated protein 14 homolog A	UTP14A	UTP14A	DYLLSESEDEGDNDGER	S29	2xPhospho [S5; S7]	0	0	0	0	0	0	696857	1.05586e+06	0	0	0	0	0	312386	0	0	0	0	648761	0	0	0	0	0	0	0	0	1.37761e+06	0	0	0	0	0	0	0	0	0	0	0	0	0	0	0
Q9BVJ6	U3 small nucleolar RNA-associated protein 14 homolog A	UTP14A	UTP14A	DYLLSESEDEGDNDGER	S31	2xPhospho [S5; S7]	0	0	0	0	0	0	696857	1.05586e+06	0	0	0	0	0	312386	0	0	0	0	648761	0	0	0	0	0	0	0	0	1.37761e+06	0	0	0	0	0	0	0	0	0	0	0	0	0	0	0
Q9BVJ6	U3 small nucleolar RNA-associated protein 14 homolog A	UTP14A	UTP14A	NKQPVTDPLLTPVEK	T205	1xPhospho [T11]	0	0	0	0	0	2.89625e+06	0	0	0	0	0	0	0	0	0	0	0	0	0	0	0	0	0	0	0	0	583689	0	0	955941	0	0	0	0	0	0	0	0	0	0	0	0	0
Q9BVJ6	U3 small nucleolar RNA-associated protein 14 homolog A	UTP14A	UTP14A	DYLLSESEDEGDNDGERK	S31	1xPhospho [S7]	0	0	0	0	0	0	0	0	0	0	0	0	0	0	0	0	0	0	0	0	0	0	0	0	0	1.39019e+06	0	1.82333e+06	0	0	0	0	0	0	0	0	0	0	0	0	0	0	2.08039e+06
D3DWB6	Ubiquitinyl hydrolase 1	USP9X	USP9X	SPHVFYR	S418	1xPhospho [S1]	7.3836e+07	1.42717e+06	4.7198e+07	1.49022e+07	1.72254e+07	2.09074e+07	3.53609e+07	1.11874e+08	2.69277e+07	6.19203e+06	2.29055e+07	6.61854e+07	1.33568e+07	0	2.21762e+07	1.44737e+07	8.66614e+07	3.02299e+07	2.34508e+07	3.79841e+07	3.67861e+07	4.91682e+06	6.66068e+07	0	3.78333e+07	8.27888e+07	1.28409e+08	1.28141e+07	3.12972e+07	1.03226e+08	3.58218e+07	1.16777e+06	1.01626e+08	2.81517e+07	1.40924e+08	1.07768e+06	1.17562e+08	5.98203e+07	2.21634e+07	4.11232e+06	9.25926e+07	1.51359e+07	6.93919e+07
Q93009	Ubiquitin carboxyl-terminal hydrolase 7	USP7	USP7	IIGVHQEDELLECLSPATSR	S963	1xCarbamidomethyl [C13]; 1xPhospho [S15]	0	0	566914	0	0	0	412459	618157	0	0	0	0	0	0	0	0	0	0	0	0	0	0	0	0	0	0	0	810133	933957	0	0	0	0	0	0	328539	0	0	0	0	0	0	0
Q93009	Ubiquitin carboxyl-terminal hydrolase 7	USP7	USP7	AGEQQLSEPEDMEMEAGDTDDPPR	S18	1xPhospho [S7]; 2xOxidation [M12; M14]	9.0937e+06	1.58143e+07	4.06439e+07	3.45381e+07	2.66461e+07	3.82668e+06	2.52131e+07	2.76024e+07	1.57436e+07	1.45566e+07	2.39312e+07	4.11006e+06	2.25899e+07	0	1.42744e+07	2.48841e+07	9.74216e+06	1.41373e+07	1.06982e+07	3.20763e+07	9.06074e+06	4.01767e+07	9.59376e+06	1.88088e+07	1.59961e+07	9.22918e+06	1.19766e+07	6.60324e+06	5.72267e+06	8.33403e+06	1.19094e+07	1.18112e+07	1.20927e+07	1.06776e+07	1.15216e+07	9.7101e+06	8.65539e+06	1.08423e+07	1.73795e+07	1.22654e+07	1.06366e+07	1.22345e+07	1.40352e+07
Q93009	Ubiquitin carboxyl-terminal hydrolase 7	USP7	USP7	AGEQQLSEPEDMEMEAGDTDDPPR	S18	1xPhospho [S7]	1.80028e+07	5.36587e+07	4.15897e+07	1.30725e+07	3.2925e+07	3.02296e+07	3.85072e+07	3.70596e+07	4.55039e+07	8.09934e+06	2.66267e+07	1.11292e+07	4.99578e+07	1.19368e+06	4.7646e+07	4.92085e+07	2.01561e+07	2.34971e+07	2.58543e+07	5.87049e+07	4.25993e+07	6.66045e+07	7.61238e+07	6.0249e+07	2.47761e+07	4.89057e+07	2.28326e+07	4.4092e+07	3.73647e+07	1.70436e+07	3.18305e+07	3.38432e+07	2.22425e+06	2.88291e+07	2.12809e+07	2.4631e+07	2.76158e+07	1.69371e+07	3.46182e+07	6.7934e+07	6.45138e+07	3.30478e+07	5.67933e+07
Q92738	USP6 N-terminal-like protein	USP6NL	USP6NL	SVGRPSPLASGR	S391	2xPhospho [S1; S6]	8.98459e+06	0	3.76163e+06	0	0	1.57882e+06	0	0	2.14403e+06	0	0	0	0	0	0	0	0	3.04535e+06	3.02042e+06	1.5699e+06	0	2.21011e+06	0	0	0	3.57801e+06	9.00065e+06	1.58899e+06	0	0	5.89513e+06	1.406e+06	0	0	0	0	0	0	0	0	3.96094e+06	0	1.39532e+06
Q92738	USP6 N-terminal-like protein	USP6NL	USP6NL	SVGRPSPLASGR	S396	2xPhospho [S1; S6]	8.98459e+06	0	3.76163e+06	0	0	1.57882e+06	0	0	2.14403e+06	0	0	0	0	0	0	0	0	3.04535e+06	3.02042e+06	1.5699e+06	0	2.21011e+06	0	0	0	3.57801e+06	9.00065e+06	1.58899e+06	0	0	5.89513e+06	1.406e+06	0	0	0	0	0	0	0	0	3.96094e+06	0	1.39532e+06
Q70EL1	Inactive ubiquitin carboxyl-terminal hydrolase 54	USP54	USP54	SLSGTVVSEREEAPVSSHSFDSSNVR	S1420	1xPhospho [S3]	0	0	0	3.92249e+06	1.15297e+06	3.48794e+06	0	1.33349e+06	3.32581e+06	1.73716e+06	0	0	0	437063	0	4.95479e+06	0	1.93681e+06	1.42554e+06	1.16212e+06	4.56662e+06	0	2.92958e+06	0	771873	0	5.91583e+06	4.08698e+06	1.36995e+06	0	793958	0	0	0	655714	2.85232e+06	1.78534e+06	990687	6.82758e+06	0	0	0	0
Q70EL1	Inactive ubiquitin carboxyl-terminal hydrolase 54	USP54	USP54	RESLNIDSIFSK	S582	1xPhospho [S3]	0	0	1.57763e+06	0	0	0	0	0	0	0	0	0	0	0	0	0	0	0	0	0	0	0	0	0	0	0	0	4.22168e+06	0	0	0	0	0	0	0	0	0	0	0	0	0	0	0
Q70EL1	Inactive ubiquitin carboxyl-terminal hydrolase 54	USP54	USP54	KDPANPSPVMPGIATSER	S1036	1xPhospho [S7]	0	1.49841e+06	1.92398e+06	1.2697e+06	680553	2.77514e+06	2.3749e+06	3.04597e+06	0	0	1.04155e+06	1.65743e+06	3.37048e+06	0	4.41531e+06	0	0	0	0	0	3.96595e+06	0	1.68635e+06	786538	2.63096e+06	1.45345e+06	2.44161e+06	7.01322e+06	3.48536e+06	0	0	792798	0	0	0	2.2974e+06	5.52858e+06	3.27576e+06	7.56889e+06	0	0	0	2.31765e+06
Q70EL1	Inactive ubiquitin carboxyl-terminal hydrolase 54	USP54	USP54	NSHHSWEPLDAPEGK	S988	1xPhospho [S5]	0	0	0	0	0	955739	0	442881	0	0	887711	0	0	0	0	2.40009e+06	0	1.78862e+06	0	1.70369e+06	0	0	0	982645	0	3.82315e+06	0	2.16036e+06	1.31976e+06	0	0	1.38642e+06	0	0	0	0	0	0	1.12429e+06	0	0	0	821505
Q70EL1	Inactive ubiquitin carboxyl-terminal hydrolase 54	USP54	USP54	KGDEPQASGYHSEGETLK	S481	1xPhospho [S12]	0	0	0	0	3.1558e+06	3.07678e+06	0	0	4.5502e+06	0	4.29311e+06	0	0	5.46655e+06	0	3.37944e+06	0	0	3.527e+06	3.24243e+06	2.61383e+06	0	0	0	0	4.01296e+06	4.04496e+06	4.07166e+06	0	0	4.25356e+06	0	0	0	0	2.26467e+06	0	4.31616e+06	1.79842e+06	0	3.94497e+06	0	1.39831e+06
Q70EL1	Inactive ubiquitin carboxyl-terminal hydrolase 54	USP54	USP54	GSVQGMFAPR	S14	1xPhospho [S2]	0	0	0	0	0	0	685778	761370	0	0	0	0	0	0	0	0	0	0	0	0	904965	0	0	0	0	0	0	0	465446	0	0	0	0	0	0	890891	0	0	0	0	0	0	347442
Q70EL1	Inactive ubiquitin carboxyl-terminal hydrolase 54	USP54	USP54	TLNYQSLPHR	S1531	1xPhospho [S6]	0	0	0	0	0	0	1.30115e+06	2.48442e+06	0	0	1.77155e+06	0	0	0	0	0	0	0	0	0	1.02443e+06	0	0	0	0	0	1.28541e+06	3.93654e+06	0	0	0	0	0	0	0	534062	0	0	997510	0	0	0	1.26275e+06
Q70EL1	Inactive ubiquitin carboxyl-terminal hydrolase 54	USP54	USP54	GLSRECGEDEQYSAENLR	S1398	1xCarbamidomethyl [C6]; 1xPhospho [S3]	0	0	0	0	0	0	0	0	0	0	0	0	0	0	0	0	0	0	0	0	0	0	612207	0	0	0	0	0	0	0	0	420100	0	0	0	0	0	0	517088	0	0	0	0
Q70EL1	Inactive ubiquitin carboxyl-terminal hydrolase 54	USP54	USP54	FGGPSPQYK	S632	1xPhospho [S5]	0	0	0	0	0	1.34462e+06	0	0	0	0	0	0	0	0	0	0	0	0	0	0	740071	0	0	0	0	0	1.97981e+06	1.16232e+06	0	0	2.55392e+06	0	0	0	0	0	1.73471e+06	0	0	0	0	0	0
Q70EL1	Inactive ubiquitin carboxyl-terminal hydrolase 54	USP54	USP54	KGSLIER	S456	1xPhospho [S3]	0	0	0	0	1.08825e+06	0	0	0	0	0	0	0	0	0	1.47324e+06	0	1.79902e+06	0	0	1.83999e+06	1.86171e+06	0	2.41712e+06	0	0	3.5124e+06	4.46639e+06	1.02388e+06	943958	0	0	0	5.47657e+07	0	0	0	0	2.94275e+06	2.07611e+06	0	0	0	0
Q70EL1	Inactive ubiquitin carboxyl-terminal hydrolase 54	USP54	USP54	RESLNIDSIFSK	S582	2xPhospho [S3; S8]	0	0	0	0	0	0	0	0	0	0	0	0	0	0	0	0	0	0	0	0	0	0	0	0	0	0	0	0	0	0	0	0	0	0	0	0	0	0	0	0	0	0	0
Q70EL1	Inactive ubiquitin carboxyl-terminal hydrolase 54	USP54	USP54	RESLNIDSIFSK	S587	2xPhospho [S3; S8]	0	0	0	0	0	0	0	0	0	0	0	0	0	0	0	0	0	0	0	0	0	0	0	0	0	0	0	0	0	0	0	0	0	0	0	0	0	0	0	0	0	0	0
Q96K76	Ubiquitin carboxyl-terminal hydrolase 47	USP47	USP47	STETSDFENIESPLNERDSSASVDNR	S917	1xPhospho [S19]	0	0	0	0	0	0	947829	0	0	0	0	0	0	0	0	0	0	0	0	0	0	0	0	0	0	0	0	2.20728e+06	0	0	0	0	0	0	0	0	0	0	0	0	0	0	2.09359e+06
Q96K76	Ubiquitin carboxyl-terminal hydrolase 47	USP47	USP47	VKGPVGSLKSVEAILEESTEK	S868	1xPhospho [S10]	0	0	0	0	0	0	0	0	0	0	0	0	0	0	0	0	0	0	0	0	0	0	0	0	0	0	0	0	0	0	0	0	0	0	0	0	0	0	0	0	0	0	0
Q96K76	Ubiquitin carboxyl-terminal hydrolase 47	USP47	USP47	LFVLLPEQSPVSYSK	S832	1xPhospho [S9]	0	264544	553459	0	79444.9	0	34662.6	0	0	0	0	0	0	0	0	0	0	0	0	0	0	0	0	73178.1	0	0	0	0	0	0	0	0	0	0	0	0	34659.4	0	171641	0	0	0	0
Q96K76	Ubiquitin carboxyl-terminal hydrolase 47	USP47	USP47	VKGPVGSLK	S865	1xPhospho [S7]	4.13802e+06	1.01574e+06	1.1044e+06	1.22402e+06	2.50628e+06	927094	1.18532e+06	1.07663e+06	2.08231e+06	0	1.33193e+06	1.4799e+06	3.48063e+06	0	1.51471e+06	0	2.53594e+06	1.74247e+06	0	2.57191e+06	3.29141e+06	0	685270	3.05708e+06	1.11155e+06	2.6728e+06	1.70672e+06	2.78396e+06	2.16457e+06	1.66824e+06	1.6674e+06	1.23174e+06	0	2.68216e+06	2.50131e+06	3.50428e+06	1.96126e+06	1.5515e+06	1.32814e+06	0	2.46127e+06	0	2.5112e+06
Q70EL4	Ubiquitin carboxyl-terminal hydrolase 43	USP43	USP43	FSLSLHSESK	S389	1xPhospho [S2]	0	0	0	1.6109e+06	0	0	590839	504758	0	0	0	0	0	0	0	0	0	0	0	0	0	0	0	2.98515e+06	0	0	980327	1.37952e+06	901709	0	0	0	0	0	0	0	2.25065e+06	0	0	0	1.53756e+06	0	381698
A4D2N6	Ubiquitin specific protease 42	USP42	USP42	SKPSPQKDQALGDGIAPPQK	S75	1xPhospho [S4]	0	0	0	0	0	0	0	2.13296e+06	0	0	0	0	0	0	0	0	0	0	0	0	0	0	0	0	0	0	0	1.10139e+07	941035	0	2.59422e+06	0	0	0	1.66543e+06	0	3.51399e+06	1.10085e+06	0	0	0	0	0
A4D2N6	Ubiquitin specific protease 42	USP42	USP42	GPPEDRDAEPQPGSPAAESLEEPDAAAGLSSTK	S754	1xPhospho [S14]	0	5.80112e+06	0	0	0	0	0	1.06995e+06	0	0	1.54195e+06	0	0	0	1.90458e+06	0	0	0	2.1434e+06	7.16224e+06	0	0	0	2.00714e+06	3.01503e+06	0	2.52056e+06	0	2.93924e+06	0	3.42214e+06	6.49328e+06	0	2.85781e+06	2.93435e+06	0	1.28466e+06	0	0	0	6.88739e+06	0	8.66295e+06
A4D2N6	Ubiquitin specific protease 42	USP42	USP42	HQQDSDLSAACSDADLHR	S1219	1xCarbamidomethyl [C11]; 1xPhospho [S5]	2.86066e+06	0	0	1.03525e+06	0	0	1.19473e+06	1.80957e+06	0	0	1.39105e+06	0	0	0	1.15345e+06	0	0	0	0	2.14414e+06	0	0	2.49545e+06	0	0	6.45892e+06	0	2.35248e+06	0	0	8.06073e+06	3.07594e+06	0	0	0	0	0	0	0	0	2.14043e+06	0	2.08423e+06
A4D2N6	Ubiquitin specific protease 42	USP42	USP42	DSALAEAPEGLSPAPPAR	S856	1xPhospho [S12]	2.87005e+06	9.82027e+06	1.42198e+07	5.8188e+06	9.0963e+06	5.81204e+07	2.88987e+07	1.99374e+07	0	0	1.17062e+07	3.80331e+07	8.89536e+06	1.49415e+06	1.67433e+07	3.40167e+07	7.42362e+06	9.20624e+06	5.9296e+06	2.04417e+07	5.07882e+07	6.84628e+06	1.95858e+07	1.52092e+07	1.0679e+07	1.23324e+07	1.53747e+07	3.27644e+07	1.45347e+07	1.12136e+07	9.6152e+06	2.24263e+07	0	1.18402e+07	1.12236e+07	1.05927e+07	2.27921e+07	4.95497e+07	5.45374e+07	8.05994e+07	7.41616e+07	1.99501e+07	3.72369e+07
A4D2N6	Ubiquitin specific protease 42	USP42	USP42	RSEQKDPLEEPK	S1181	1xPhospho [S2]	0	1.90434e+06	1.64904e+06	0	1.05758e+06	1.10221e+06	1.48164e+06	1.55771e+06	0	0	1.08659e+06	0	2.79872e+06	0	2.15752e+06	0	0	0	0	1.66462e+06	0	0	2.82976e+06	1.67776e+06	1.32187e+06	1.31404e+06	872860	7.51759e+06	1.58312e+06	3.11235e+06	1.62575e+06	2.62323e+06	0	0	0	2.16893e+06	5.70135e+06	2.91625e+06	0	3.44067e+06	0	0	2.21918e+06
A4D2N6	Ubiquitin specific protease 42	USP42	USP42	LNSSVLVPYGAESSEDSDEESKGLGK	S612	1xPhospho [S14]	153843	0	0	0	0	0	5.66864e+06	2.16509e+06	0	0	0	0	0	0	0	199637	0	0	558048	0	0	0	0	0	0	2.92421e+06	2.89069e+06	4.66873e+06	0	1.4075e+06	0	1.53547e+06	0	0	4.53107e+06	0	0	0	0	0	0	692396	0
Q9NVE5	Ubiquitin carboxyl-terminal hydrolase 40	USP40	USP40	NSSLQAESDFQR	S414	1xPhospho [S3]	0	0	0	0	1.19683e+06	862961	0	0	1.03422e+06	0	0	1.91049e+06	0	0	0	0	0	0	1.9183e+06	0	1.13203e+06	0	0	0	775998	0	0	0	0	0	0	0	0	0	0	1.30699e+06	0	0	0	0	0	0	0
Q08AK7	Ubiquitin carboxyl-terminal hydrolase	USP4	USP4	NFTTSPK	S244	1xPhospho [S5]	0	2.22327e+06	688884	1.65696e+06	1.72706e+06	2.07118e+06	1.76346e+06	1.42514e+06	0	0	0	0	0	0	1.47207e+06	0	1.20917e+06	1.38712e+06	0	2.9671e+06	2.06553e+06	1.00768e+06	1.62946e+06	1.44044e+06	2.18553e+06	2.558e+06	1.67705e+06	1.18782e+06	2.4253e+06	2.36581e+06	2.74789e+06	2.18793e+06	0	2.54949e+06	2.53856e+06	2.92472e+06	3.23043e+06	1.9914e+06	1.24334e+06	0	0	0	1.7637e+06
Q53GS9	U4/U6.U5 tri-snRNP-associated protein 2	USP39	USP39	EREVDEDSEPER	S82	1xPhospho [S8]	8.56532e+06	7.65136e+06	2.03877e+07	2.79356e+07	0	1.2745e+06	2.41271e+06	0	3.67101e+06	3.63567e+06	0	1.07905e+08	1.83506e+08	8.02516e+07	5.35782e+06	1.2363e+08	6.52522e+07	9.84408e+07	5.11659e+07	7.65383e+07	7.91491e+07	1.06963e+08	6.65584e+07	6.45363e+07	1.03441e+07	8.99081e+07	2.28873e+07	1.33631e+08	8.34196e+07	3.10118e+06	7.65176e+07	149837997	0	0	9.22112e+06	4.57211e+06	1.158e+08	6.22347e+07	1.81371e+07	1.09292e+07	4.66793e+07	1.61982e+07	1.73736e+07
Q53GS9	U4/U6.U5 tri-snRNP-associated protein 2	USP39	USP39	EREVDEDSEPEREVR	S82	1xPhospho [S8]	8.51069e+07	1.92502e+08	1.71829e+08	2.03367e+08	1.59982e+08	7.56333e+07	181920455	134197274	3.37116e+07	9.84768e+07	2.26386e+08	1.33524e+08	3.73306e+08	1.69125e+08	1.67702e+08	2.16499e+08	1.15298e+08	1.43653e+08	9.61069e+07	2.53431e+08	2.48104e+08	3.19591e+08	1.63425e+08	1.4267e+08	1.83886e+08	2.46604e+08	1.69769e+08	384778553	1.61092e+08	1.67884e+08	2.83321e+08	4.11954e+08	1.15442e+08	9.54358e+07	1.77267e+08	1.06743e+08	1.9632e+08	1.82604e+08	3.60003e+08	2.36992e+08	3.50694e+08	4.25593e+08	2.40052e+08
Q53GS9	U4/U6.U5 tri-snRNP-associated protein 2	USP39	USP39	EAPASVVPFVR	S65	1xPhospho [S5]	0	0	1.31267e+06	0	0	0	701224	474509	0	0	0	0	0	0	0	0	0	0	0	0	0	0	0	0	0	0	0	533692	0	0	0	0	0	0	0	1.90059e+06	370452	0	0	0	0	0	0
Q53GS9	U4/U6.U5 tri-snRNP-associated protein 2	USP39	USP39	EVDEDSEPEREVR	S82	1xPhospho [S6]	7.22573e+07	103662296	1.22975e+08	1.08429e+08	1.26361e+08	6.06129e+07	105101578	9.1307e+07	4.50338e+07	1.02136e+08	1.29887e+08	6.90522e+07	1.74663e+08	1.10699e+08	8.43995e+07	1.23375e+08	5.91451e+07	7.86204e+07	5.74745e+07	1.58134e+08	1.31957e+08	2.54079e+08	1.14563e+08	9.75525e+07	1.0498e+08	1.38541e+08	108486632	1.88512e+08	1.04042e+08	1.06562e+08	1.38514e+08	2.49538e+08	7.23473e+07	1.00301e+08	1.36493e+08	6.21264e+07	9.71677e+07	1.25798e+08	2.09305e+08	108286340	1.51314e+08	2.06252e+08	1.25056e+08
Q53GS9	U4/U6.U5 tri-snRNP-associated protein 2	USP39	USP39	EVDEDSEPER	S82	1xPhospho [S6]	5.92698e+06	6.24318e+06	1.50968e+07	1.93704e+07	3.44788e+06	0	1.39676e+06	3.15375e+06	0	0	3.30773e+06	1.60408e+07	3.8016e+07	1.70404e+07	2.93978e+06	3.9359e+07	1.89606e+07	2.9531e+07	1.25502e+07	3.06362e+07	2.74413e+07	2.76089e+07	1.67824e+07	2.36226e+07	1.16091e+07	2.21543e+07	1.53833e+07	3.59058e+07	1.81728e+07	9.88339e+06	2.96916e+07	3.85194e+07	0	1.93373e+07	1.11708e+07	1.63802e+06	3.17914e+07	2.21106e+07	8.87319e+06	0	1.05151e+07	0	4.45493e+06
Q53GS9	U4/U6.U5 tri-snRNP-associated protein 2	USP39	USP39	EPEAASSRGSPVR	S46	1xPhospho [S10]	0	3.95884e+06	0	3.32737e+06	1.88473e+06	0	2.11364e+06	0	0	3.01858e+06	2.99264e+06	0	0	0	7.02289e+06	0	0	0	252275	4.4014e+06	0	1.82352e+07	4.69808e+06	4.16179e+06	31706.9	4.11901e+06	0	4.06612e+06	1.27986e+06	0	658631	1.05056e+07	0	0	4.13506e+06	73806	4.98478e+06	6.45488e+06	0	0	0	0	0
A0A075B784	Ubiquitin carboxyl-terminal hydrolase	USP36	USP36	ATGNDLRPPPPSPSSDLTHPMK	S713	1xPhospho [S12]; 1xOxidation [M21]	0	1.73892e+06	2.49104e+06	0	0	1.0887e+06	0	2.24915e+06	1.69342e+06	0	836848	5.90659e+06	0	0	0	0	3.42445e+06	1.78299e+06	6.39948e+06	0	0	0	527156	0	0	0	3.176e+06	801943	2.97225e+06	3.42464e+06	2.82639e+06	0	0	0	3.65162e+06	0	1.12084e+06	3.38573e+06	3.44698e+06	0	0	0	836582
H7C183	Ubiquitinyl hydrolase 1 (Fragment)	USP34	USP34	GPENPQVEVLSEEEGEEEEEEEDILSLAEEK	S248	1xPhospho [S11]	0	0	409974	0	303032	0	410557	838102	0	0	149453	0	428550	0	212261	208671	594686	0	706347	0	104566	0	2.19021e+06	306379	0	126902	0	656646	0	0	1.02657e+06	1.07577e+06	0	1.76705e+06	407442	250272	1.79922e+06	1.58228e+06	0	465565	0	1.50883e+06	579026
H7C183	Ubiquitinyl hydrolase 1 (Fragment)	USP34	USP34	RRVSSDEEHTVDSCISDMK	S1035	1xCarbamidomethyl [C14]; 1xPhospho [S4]; 1xOxidation [M18]	0	0	0	0	0	0	0	0	0	0	0	0	0	0	0	0	0	0	0	0	0	0	0	0	0	0	0	0	0	0	0	0	0	0	0	0	0	0	0	0	0	0	0
H7C183	Ubiquitinyl hydrolase 1 (Fragment)	USP34	USP34	RVSSDEEHTVDSCISDMK	S1035	1xCarbamidomethyl [C13]; 2xPhospho [S3; S4]	2.38553e+06	0	1.20035e+06	0	0	0	0	0	0	0	0	0	0	0	0	0	0	0	0	943022	0	0	0	0	0	2.28875e+06	0	750114	0	0	1.35735e+06	1.26622e+06	0	0	0	0	0	0	0	3.41025e+06	0	2.13432e+06	965322
H7C183	Ubiquitinyl hydrolase 1 (Fragment)	USP34	USP34	RVSSDEEHTVDSCISDMK	S1036	1xCarbamidomethyl [C13]; 2xPhospho [S3; S4]	2.38553e+06	0	1.20035e+06	0	0	0	0	0	0	0	0	0	0	0	0	0	0	0	0	943022	0	0	0	0	0	2.28875e+06	0	750114	0	0	1.35735e+06	1.26622e+06	0	0	0	0	0	0	0	3.41025e+06	0	2.13432e+06	965322
[truncated: 23,917 more rows]
[truncated: 79 more columns]
