# Supplementary material for: Proteogenomic analysis of air-pollution-associated lung cancer reveals prevention and therapeutic opportunities
Source: eLife. 2024 Oct 21;13:RP95453. doi: 10.7554/eLife.95453 (PMC11493407; doi:10.7554/eLife.95453)
Supplement: Supplementary file 7. [file elife-95453-supp7.xlsx]

## Sheet: Description
Table S7: Estimation of Immune cell infiltration with ssGSEA method.

## Sheet: S7
	XWFA_0002_N	XWFA_0003_N	XWFA_0004_N	XWFA_0005_N	XWFA_0006_N	XWFA_0007_N	XWFA_0008_N	XWFA_0009_N	XWFA_0010_N	XWFA_0011_N	XWFA_0012_N	XWFA_0013_N	XWFA_0014_N	XWFA_0015_N	XWFA_0016_N	XWFA_0017_N	XWFA_0018_N	XWFA_0020_N	XWFA_0021_N	XWFA_0022_N	XWFA_0023_N	XWFA_0024_N	XWFA_0025_N	XWFA_0026_N	XWFA_0027_N	XWFA_0028_N	XWFA_0029_N	XWFA_0030_N	XWFA_0032_N	XWFA_0033_N	XWFA_0047_N	XWFA_0072_N	XWFA_0092_N	XWFA_0001_T	XWFA_0002_T	XWFA_0003_T	XWFA_0004_T	XWFA_0005_T	XWFA_0006_T	XWFA_0007_T	XWFA_0008_T	XWFA_0009_T	XWFA_0010_T	XWFA_0011_T	XWFA_0012_T	XWFA_0013_T	XWFA_0014_T	XWFA_0015_T	XWFA_0016_T
Activated_CD4_T_cell	0.0870262	0.0572803	0.124641	0.0378623	0.098966	0.0530562	0.189339	0.0908818	0.0424338	0.0664099	-0.0326442	0.0505111	0.107636	0.0191257	0.277494	-0.00610119	0.0370855	0.10646	0.11545	0.0594169	0.094877	0.109418	0.0392565	0.0343367	0.127787	0.0761801	0.0975473	-0.00794557	0.0620017	0.164177	0.00146418	0.0968991	0.0468934	0.0603564	0.101391	0.0849221	0.0216964	0.230468	0.110236	0.0922787	0.0648631	0.0670312	0.128181	0.0624136	0.0844289	0.153958	0.177829	-0.018592	0.167997
Activated_CD8_T_cell	0.343272	0.244549	0.27595	0.218751	0.235797	0.344931	0.177918	0.202927	0.236706	0.227159	0.241383	0.207068	0.148871	0.222756	0.247631	0.336746	0.231402	0.219933	0.227447	0.18757	0.239933	0.258827	0.242741	0.179075	0.212881	0.186945	0.238006	0.230653	0.186983	0.245777	0.230443	0.288287	0.182196	0.243654	0.317918	0.233974	0.229365	0.346082	0.271907	0.27593	0.257701	0.247603	0.185513	0.137536	0.213247	0.237726	0.169753	0.104874	0.231212
Activated_dendritic_cell	0.26577	0.296409	0.300392	0.308291	0.317949	0.279523	0.31795	0.330008	0.292924	0.318849	0.223953	0.311508	0.316328	0.298873	0.357157	0.299842	0.321467	0.294779	0.277002	0.300188	0.295048	0.313405	0.309512	0.293761	0.297839	0.284172	0.294357	0.296988	0.306922	0.379414	0.301167	0.282078	0.233329	0.324038	0.298895	0.27668	0.222379	0.292355	0.3017	0.285524	0.311378	0.276855	0.271581	0.263605	0.31043	0.320868	0.28354	0.276213	0.306614
CD56bright_natural_killer_cell	0.197831	0.181056	0.203539	0.202223	0.190328	0.20573	0.185043	0.208273	0.194802	0.181572	0.18345	0.208167	0.180531	0.187436	0.19891	0.209567	0.210735	0.201891	0.215038	0.188569	0.200386	0.205608	0.214378	0.193888	0.230303	0.229992	0.23015	0.203936	0.190135	0.22499	0.208096	0.197244	0.162687	0.224346	0.201966	0.251743	0.217896	0.236566	0.222893	0.219965	0.210049	0.190397	0.23361	0.218579	0.224685	0.200877	0.250986	0.220113	0.255835
Central_memory_CD4_T_cell	0.562998	0.559043	0.557934	0.563906	0.554974	0.560795	0.570644	0.561141	0.556337	0.575575	0.555726	0.564478	0.548249	0.570045	0.575451	0.570591	0.565354	0.5662	0.564369	0.564126	0.574238	0.578723	0.573168	0.566558	0.586966	0.573881	0.581628	0.568628	0.564195	0.596926	0.570865	0.584246	0.541195	0.573468	0.571766	0.605443	0.554642	0.564842	0.558235	0.578769	0.561254	0.605568	0.619278	0.57839	0.596229	0.608187	0.560303	0.5936	0.61998
Central_memory_CD8_T_cell	0.37304	0.418479	0.423828	0.4188	0.433445	0.410652	0.480387	0.443625	0.435942	0.438358	0.377975	0.414941	0.46838	0.432143	0.49633	0.41585	0.420411	0.439566	0.481895	0.463727	0.419731	0.434381	0.416598	0.430826	0.416105	0.404105	0.445121	0.421154	0.419417	0.531378	0.430586	0.437027	0.38526	0.46074	0.390767	0.394621	0.365775	0.343223	0.405125	0.399623	0.456839	0.339962	0.353456	0.358931	0.418225	0.404303	0.397189	0.433197	0.465158
Effector_memeory_CD4_T_cell	0.189594	0.229338	0.242802	0.27237	0.227295	0.211966	0.236059	0.233306	0.250711	0.221484	0.14986	0.230696	0.25343	0.207726	0.250521	0.224957	0.224178	0.260436	0.258247	0.227587	0.233396	0.247314	0.228942	0.198169	0.199351	0.186397	0.254109	0.23112	0.244493	0.233107	0.214632	0.237591	0.206276	0.18898	0.20521	0.184064	0.144985	0.182716	0.19632	0.206301	0.22984	0.183888	0.183293	0.188036	0.211623	0.212725	0.188128	0.156548	0.238435
Effector_memeory_CD8_T_cell	0.382883	0.39696	0.400469	0.366962	0.353871	0.388454	0.358161	0.397834	0.383895	0.364381	0.315879	0.37973	0.357021	0.343867	0.384799	0.376991	0.350157	0.391436	0.390822	0.375143	0.355422	0.392711	0.364925	0.371039	0.32812	0.340817	0.387537	0.382718	0.334575	0.384128	0.349213	0.365518	0.34318	0.360235	0.37024	0.35031	0.295062	0.34117	0.347364	0.378279	0.399206	0.335068	0.315199	0.303064	0.326631	0.357398	0.360482	0.242328	0.362033
Natural_killer_cell	0.407857	0.423187	0.433645	0.401653	0.406608	0.411465	0.396876	0.425951	0.405449	0.420339	0.38818	0.420373	0.446271	0.42514	0.452143	0.413801	0.424331	0.419792	0.399595	0.446253	0.430856	0.408274	0.389116	0.419869	0.424216	0.373283	0.445382	0.421427	0.386388	0.420236	0.427105	0.42872	0.407345	0.396475	0.427826	0.371034	0.374356	0.377617	0.40918	0.412034	0.419573	0.346296	0.334708	0.368706	0.403272	0.400558	0.390788	0.352186	0.39399
Natural_killer_T_cell	0.131548	0.162996	0.178938	0.16338	0.118064	0.134109	0.212555	0.176378	0.129302	0.175965	0.113683	0.172517	0.21001	0.142748	0.227816	0.175362	0.155438	0.18987	0.15086	0.153026	0.180717	0.14645	0.132577	0.149072	0.106049	0.149353	0.183085	0.163385	0.135907	0.226362	0.136494	0.1507	0.12258	0.169074	0.151994	0.0895336	0.0590186	0.0809295	0.117623	0.153302	0.192082	0.0726836	0.05711	0.0788066	0.147576	0.137871	0.140429	0.084705	0.161963
Type_1_T_helper_cell	0.216114	0.229459	0.2496	0.21542	0.215338	0.219875	0.248368	0.230015	0.203816	0.251723	0.189512	0.235626	0.252822	0.230265	0.301935	0.217188	0.215132	0.238354	0.199409	0.214351	0.220091	0.20933	0.202089	0.212177	0.20665	0.204208	0.246106	0.205917	0.205962	0.272721	0.208407	0.230222	0.205183	0.211112	0.237719	0.183028	0.168927	0.146499	0.187065	0.19869	0.227832	0.168873	0.153129	0.152708	0.1946	0.228776	0.201899	0.145321	0.234916
Type_17_T_helper_cell	0.000693191	0.0385604	0.0241323	-0.00243396	0.0242562	0.0113878	0.0277893	0.0274779	0.00454179	0.0499083	0.02046	0.0186346	0.0156386	0.0188144	0.0984813	0.00887019	0.034935	-0.00708777	0.0250892	0.0202634	0.0148084	0.00457267	-0.00650082	0.00872308	0.0617343	0.0448494	0.0151609	0.0366275	0.0293676	0.0778065	0.026065	0.0127113	0.0447256	0.0454345	0.0023326	-0.00458711	0.0200078	-0.0267929	0.0180949	0.0173723	0.0100188	-0.0211793	-0.0464761	-0.0248632	-0.0161286	0.00532697	-0.0139573	-0.00067895	-0.0132498
CD56dim_natural_killer_cell	0.331682	0.335511	0.341407	0.347904	0.322849	0.338655	0.360404	0.35037	0.328482	0.34906	0.343062	0.344892	0.328087	0.332139	0.34211	0.352067	0.367136	0.354171	0.344034	0.344552	0.330264	0.354477	0.340493	0.347509	0.32622	0.418623	0.367708	0.338323	0.337992	0.35707	0.358789	0.349651	0.308842	0.392769	0.352261	0.356772	0.39619	0.480788	0.324072	0.34593	0.350495	0.38192	0.386582	0.367542	0.410597	0.391637	0.408487	0.379488	0.387619
Immature_dendritic_cell	0.351897	0.378394	0.391395	0.39733	0.3785	0.364557	0.365403	0.400246	0.373574	0.374267	0.344364	0.406001	0.394411	0.385754	0.434718	0.37293	0.424259	0.392055	0.409263	0.384183	0.397427	0.387393	0.395102	0.39169	0.45102	0.416979	0.4216	0.389482	0.406472	0.452991	0.406082	0.405418	0.374977	0.42076	0.373989	0.395089	0.376516	0.343582	0.403281	0.359998	0.385941	0.337133	0.332516	0.337287	0.424796	0.384482	0.366467	0.392285	0.408634
Macrophage	0.103741	0.160087	0.162676	0.171084	0.175623	0.111007	0.220107	0.218019	0.145289	0.156067	0.0805069	0.166844	0.225137	0.156895	0.284631	0.131041	0.1864	0.195941	0.2159	0.146265	0.176529	0.218618	0.182247	0.123196	0.166242	0.126156	0.211273	0.161516	0.182986	0.295974	0.148529	0.154418	0.127286	0.190273	0.173893	0.0880531	0.0252583	0.0808599	0.132958	0.111587	0.195017	0.0745552	0.0341195	0.0445703	0.140891	0.132103	0.0955078	0.0852746	0.180903
MDSC	0.44701	0.457626	0.520045	0.505002	0.485769	0.462317	0.513596	0.540604	0.465498	0.481859	0.372256	0.518023	0.496903	0.473834	0.567693	0.4607	0.50485	0.550456	0.530287	0.467278	0.492083	0.511119	0.486954	0.437199	0.451936	0.424149	0.545204	0.519444	0.48673	0.580164	0.476632	0.508539	0.376752	0.54282	0.50999	0.409442	0.324232	0.425049	0.45784	0.451963	0.544617	0.38582	0.410546	0.30835	0.505679	0.506127	0.408117	0.307535	0.510007
Neutrophil	-0.0977428	0.100134	-0.100482	-0.107806	0.0199396	-0.123089	0.0648152	0.0830404	0.00202733	0.1607	-0.0898998	-0.00944525	0.0767146	0.11194	0.410026	-0.106403	-0.142179	-0.0218177	0.0287958	-0.0394527	-0.0431421	-0.113084	-0.138839	-0.114041	0.241473	-0.216237	-0.021821	-0.122013	-0.00385559	0.260415	-0.116604	0.0771637	-0.00234933	-0.067216	-0.0919145	-0.211142	-0.167348	-0.247705	-0.0485286	-0.124091	-0.0630295	-0.209639	-0.227466	-0.18138	-0.13848	-0.138132	-0.169869	-0.239014	-0.169742
Plasmacytoid_dendritic_cell	0.446308	0.459878	0.459657	0.467864	0.468647	0.446205	0.471086	0.462237	0.455397	0.46106	0.433153	0.476233	0.477784	0.476505	0.530215	0.474391	0.471048	0.457259	0.462517	0.446842	0.466219	0.459986	0.467989	0.462271	0.511643	0.425851	0.469286	0.462134	0.460651	0.525899	0.462515	0.463934	0.448662	0.455359	0.459573	0.425506	0.439601	0.393971	0.47341	0.438143	0.467413	0.408392	0.385138	0.395213	0.456891	0.438218	0.43788	0.402321	0.431307
Regulatory_T_cell	0.223598	0.261644	0.314748	0.305666	0.284266	0.256546	0.309204	0.325473	0.306005	0.278149	0.13686	0.305973	0.356767	0.268599	0.385889	0.252854	0.316068	0.303757	0.342758	0.274199	0.31382	0.285777	0.302137	0.242807	0.248691	0.292066	0.274085	0.27573	0.230848	0.385667	0.282483	0.270098	0.267862	0.307601	0.274623	0.260498	0.169797	0.325418	0.263061	0.272388	0.323449	0.22447	0.239317	0.196923	0.321711	0.308459	0.32449	0.226184	0.399224
Type_2_T_helper_cell	0.184126	0.169375	0.18929	0.169914	0.166463	0.163682	0.175084	0.14417	0.156502	0.158387	0.183786	0.162303	0.186955	0.160684	0.205241	0.142237	0.16323	0.158798	0.208785	0.174647	0.179631	0.159022	0.139851	0.167792	0.15323	0.16895	0.154883	0.15441	0.133307	0.198725	0.15911	0.181967	0.171984	0.162728	0.160319	0.181427	0.127314	0.167083	0.146099	0.167989	0.154281	0.152665	0.16799	0.208199	0.176198	0.161747	0.182778	0.163485	0.171384
Activated_B_cell	-0.127747	-0.168548	-0.109445	-0.159793	-0.124212	-0.139844	-0.034329	-0.140568	-0.133507	-0.158529	-0.193935	-0.171818	-0.140276	-0.164211	0.0180473	-0.160583	-0.163169	-0.180092	-0.121158	-0.188832	-0.189211	-0.148744	-0.180795	-0.186025	-0.166178	-0.0864931	-0.197427	-0.150505	-0.163534	-0.120764	-0.139214	-0.146323	-0.156944	-0.0527371	-0.0730955	-0.0716097	-0.0606322	0.0276021	-0.0897974	-0.134486	-0.0836032	0.0635423	-0.0518387	-0.0728097	-0.139289	-0.0226677	-0.117073	-0.218866	-0.0937698
Eosinophil	0.0969848	0.0760437	0.117247	0.025443	0.0544818	0.00578992	0.141092	0.0795852	0.0328723	0.121927	0.0477776	0.119351	0.189319	0.0867194	0.261879	0.0161293	-0.0130961	0.134205	0.100463	0.127654	0.0647931	0.061696	0.0199019	0.0810343	0.148239	-0.041069	0.0872942	-0.026825	0.111101	0.178568	0.0587895	0.12628	0.138719	-0.072477	0.108722	-0.011117	0.0438351	-0.0747581	0.0419293	0.0307732	0.0357259	-0.0199089	-0.113423	0.0441302	0.0196852	0.123241	0.0486033	-0.0606955	0.00972047
Gamma_delta_T_cell	0.324162	0.325806	0.357945	0.349339	0.340273	0.330649	0.358145	0.356901	0.350451	0.314805	0.305189	0.36122	0.374411	0.34429	0.386556	0.347419	0.367496	0.349653	0.407109	0.332032	0.364977	0.35039	0.347942	0.354708	0.346472	0.31423	0.383472	0.35212	0.339208	0.428769	0.336389	0.346599	0.300403	0.371299	0.342303	0.343185	0.266883	0.341368	0.301424	0.309483	0.364883	0.268097	0.295574	0.28204	0.357361	0.346696	0.352825	0.370408	0.371567
Immature_B_cell	0.118004	0.157691	0.165047	0.167881	0.133603	0.10987	0.199935	0.187891	0.153709	0.098976	0.0342405	0.146089	0.119804	0.144996	0.271783	0.122606	0.141288	0.187517	0.1191	0.122493	0.112119	0.140898	0.109763	0.0956494	0.0651206	0.129496	0.169438	0.13777	0.138254	0.177138	0.120103	0.134511	0.108389	0.163611	0.176264	0.154184	0.064843	0.165869	0.121304	0.116488	0.180469	0.197308	0.115796	0.0899942	0.109706	0.200236	0.072394	0.0169193	0.130202
Mast_cell	0.188102	0.333482	0.342486	0.299057	0.288613	0.24703	0.435835	0.375919	0.271218	0.298859	0.17852	0.294992	0.327226	0.28221	0.454492	0.20817	0.239695	0.279978	0.317735	0.278059	0.291626	0.357862	0.246765	0.242425	0.332031	0.142431	0.30693	0.235559	0.294225	0.338735	0.327692	0.325503	0.272269	0.173807	0.200265	0.217989	0.150526	0.0565015	0.203691	0.240231	0.276699	0.207469	0.0598818	0.234402	0.264549	0.325802	0.169344	0.19706	0.263974
Memory_B_cell	-5.66695e-05	0.0650486	0.0671761	0.0130637	0.0666231	-0.0026184	0.0972048	0.0958397	0.0270958	0.092448	-0.0249401	0.0714394	0.131719	0.0651922	0.13433	-0.0145387	0.0141575	0.0916009	0.0843556	0.0285158	0.0795286	0.0713848	0.0214319	0.029021	0.03557	0.00637798	0.0389029	0.0101614	0.0870217	0.136811	0.0319855	0.063918	0.0763733	0.0549306	0.0489187	0.0312918	0.0401529	0.0565476	0.0391296	0.0410766	0.0540497	0.0243445	-0.00441718	0.0644418	0.0537792	0.0811125	0.0690557	0.016301	0.0713732
Monocyte	0.459783	0.470737	0.45457	0.477455	0.477941	0.468604	0.470587	0.481117	0.453667	0.471388	0.461856	0.498582	0.477734	0.478861	0.504776	0.469475	0.480369	0.463536	0.447949	0.434124	0.463988	0.465575	0.45767	0.452194	0.450085	0.457244	0.485213	0.477101	0.466127	0.488392	0.466612	0.486519	0.450552	0.494162	0.48314	0.457245	0.446199	0.424131	0.465227	0.46119	0.492728	0.436922	0.428505	0.427671	0.469833	0.476849	0.444181	0.421702	0.485691
T_follicular_helper_cell	0.252511	0.295469	0.300963	0.295876	0.265067	0.266201	0.303068	0.320298	0.272903	0.292584	0.231091	0.29331	0.298372	0.278766	0.330358	0.261642	0.30685	0.301649	0.335204	0.276138	0.311116	0.287773	0.276081	0.288972	0.241561	0.233551	0.304801	0.31582	0.273531	0.359078	0.288051	0.286066	0.230071	0.302719	0.289591	0.263671	0.181464	0.252931	0.232941	0.284102	0.321683	0.235132	0.220605	0.232259	0.286881	0.301904	0.265951	0.249715	0.28903
[truncated: 120 more columns]
