# Supplementary material for: Proteogenomic analysis of air-pollution-associated lung cancer reveals prevention and therapeutic opportunities
Source: eLife. 2024 Oct 21;13:RP95453. doi: 10.7554/eLife.95453 (PMC11493407; doi:10.7554/eLife.95453)
Supplement: Supplementary file 9. — (a) onco_PPIs in XWLC cohort; (b) onco_PPIs in CNLC cohort; (c) onco_PPIs in TNLCF cohort; (d) onco_PPIs in TSLC cohort. [file elife-95453-supp9.xlsx]

## Sheet: Sheet1
Table S9: Onco_PPIs identified in four cohorts.
S9a. onco_PPIs in XWLC cohort;
S9b. onco_PPIs in CNLC cohort;
S9c. onco_PPIs in TNLCF cohort;
S9d. onco_PPIs in TSLC cohort;
Note：
k: number of mutations at interface of protein product of gene1
n: number of total mutations in gene1
M: length of the interface for protein product of gene1
N: length of protein product of gene1

## Sheet: S9a
Gene1	Gene2	k	n	M	N	P	FDR
MYO1C	SAP18	4	4	311	8152	2.12e-06	8.52e-05
MYO1C	ESR1	4	4	143	8152	9.47e-08	4.15e-06
MYO1C	FBL	4	4	311	8152	2.12e-06	8.52e-05
MYO1C	CBL	4	4	143	8152	9.47e-08	4.15e-06
MYO1C	MYH10	4	4	143	8152	9.47e-08	4.15e-06
MYO1C	KDR	4	4	143	8152	9.47e-08	4.15e-06
MYO1C	ACTA2	4	4	404	8152	6.03e-06	0.000226258
MYO1C	ILF3	4	4	143	8152	9.47e-08	4.15e-06
MYO1C	DKFZp686A13234	4	4	143	8152	9.47e-08	4.15e-06
MYO1C	DNAJA3	4	4	143	8152	9.47e-08	4.15e-06
MYO1C	POLR1E	4	4	143	8152	9.47e-08	4.15e-06
MYO1C	POLR1B	4	4	311	8152	2.12e-06	8.52e-05
MYO1C	DDX21	4	4	143	8152	9.47e-08	4.15e-06
MYO1C	RRN3	4	4	143	8152	9.47e-08	4.15e-06
TLR4	TIRAP	4	6	154	5256	1.05e-05	0.00039115
TLR4	BTK	4	6	154	5256	1.05e-05	0.00039115
TLR4	TICAM2	4	6	154	5256	1.05e-05	0.00039115
TLR4	MYD88	4	6	154	5256	1.05e-05	0.00039115
DLL1	MAGI2	6	6	536	3174	2.32e-05	0.000814995
ACACB	HLCS	5	10	392	14159	3.65e-06	0.00014396
ACACB	PRKAA2	5	10	392	14159	3.65e-06	0.00014396
DPYSL4	SH3GL3	3	3	174	3176	0.00016444	0.00403173
MAP2K7	MAP3K13	2	2	116	5145	0.000508329	0.00774175
MAP2K7	LPXN	2	2	35	5145	4.63e-05	0.00140895
MAP2K7	JUN	2	2	39	5145	5.75e-05	0.00168842
MAP2K7	ARR3	2	2	67	5145	0.000169582	0.0041215
MAP2K7	MAPK8	2	2	70	5145	0.000185108	0.00427597
MAP2K7	MAPK9	2	2	63	5145	0.000149938	0.00374418
MAP2K7	GSK3B	2	2	57	5145	0.000122738	0.00316346
MAP2K7	HSPE1	2	2	63	5145	0.000149938	0.00374418
MAP2K7	RPL30	2	2	67	5145	0.000169582	0.0041215
MAP2K7	MAP3K1	2	2	116	5145	0.000508329	0.00774175
MAP2K7	MAPK8IP2	2	2	116	5145	0.000508329	0.00774175
MAP2K7	MAPK14	2	2	72	5145	0.000195837	0.0044659
MAP2K7	MAP3K11	2	2	116	5145	0.000508329	0.00774175
MAP2K7	CNKSR1	2	2	116	5145	0.000508329	0.00774175
MAP2K7	ILKAP	2	2	66	5145	0.000164557	0.00403173
MAP2K7	MAP3K20	2	2	116	5145	0.000508329	0.00774175
MAP2K7	HEL-S-87p	2	2	69	5145	0.000179857	0.00417406
SYNJ2	SYNJ2	2	6	67	9985	0.000663381	0.00929934
SYNJ2	ABL1	2	6	67	9985	0.000663381	0.00929934
SYNJ2	FYN	2	6	67	9985	0.000663381	0.00929934
SYNJ2	NCK1	2	6	67	9985	0.000663381	0.00929934
SYNJ2	PIK3R1	2	6	67	9985	0.000663381	0.00929934
SYNJ2	SYNJ2BP	2	6	67	9985	0.000663381	0.00929934
SYNJ2	GRB2	2	6	67	9985	0.000663381	0.00929934
SYNJ2	RAC1	2	6	67	9985	0.000663381	0.00929934
SYNJ2	ITSN1	2	6	67	9985	0.000663381	0.00929934
SYNJ2	ITSN2	2	6	67	9985	0.000663381	0.00929934
SYNJ2	PARP2	2	6	67	9985	0.000663381	0.00929934
MDM4	CD160	2	2	106	11385	8.67e-05	0.00243693
MDM4	HSP90AB1	2	2	106	11385	8.67e-05	0.00243693
MDM4	UBC	2	2	106	11385	8.67e-05	0.00243693
MDM4	UBA1	2	2	106	11385	8.67e-05	0.00243693
MDM4	MAGEA1	2	2	106	11385	8.67e-05	0.00243693
MDM4	PSMC5	2	2	106	11385	8.67e-05	0.00243693
MDM4	MKRN3	2	2	106	11385	8.67e-05	0.00243693
MDM4	LRSAM1	2	2	106	11385	8.67e-05	0.00243693
MDM4	TRIM46	2	2	106	11385	8.67e-05	0.00243693
MDM4	USP7	2	2	106	11385	8.67e-05	0.00243693
MDM4	TRIM55	2	2	106	11385	8.67e-05	0.00243693
MDM4	CAPN7	2	2	106	11385	8.67e-05	0.00243693
GRIN2D	IL16	4	6	352	5093	0.00030551	0.0062404
GRIN2D	PATJ	4	6	352	5093	0.00030551	0.0062404
PER1	CRY1	2	4	61	7002	0.0004501	0.00714007
PER1	CRY2	2	4	66	7002	0.000526407	0.00779717
KLK10	KLK10	2	3	58	3853	0.000672975	0.00936293
KLK10	LRIF1	2	3	57	3853	0.000650083	0.00923768
KLK10	RIF1	2	3	57	3853	0.000650083	0.00923768
NCK2	SPRY2	2	2	83	2990	0.000770573	0.00992104
NCK2	FGFR1	2	2	83	2990	0.000770573	0.00992104
NCK2	CHN1	2	2	80	2990	0.000715876	0.00980473
NCK2	EFNB2	2	2	79	2990	0.000698091	0.00963372
NCK2	NR5A1	2	2	82	2990	0.000752117	0.00980679
NCK2	SF3B4	2	2	78	2990	0.000680529	0.00943914
NCK2	TRIP6	2	2	83	2990	0.000770573	0.00992104
NCK2	EIF3S3	2	2	79	2990	0.000698091	0.00963372
NCK2	FLJ00308	2	2	83	2990	0.000770573	0.00992104
NCK2	RHOV	2	2	81	2990	0.000733884	0.00980679
NCK2	SRPK1	2	2	83	2990	0.000770573	0.00992104
SPOP	PIAS1	2	2	130	6380	0.000415189	0.00706264
SPOP	RTN3	2	2	130	6380	0.000415189	0.00706264
SPOP	GLI3	2	2	129	6380	0.000408826	0.00706264
SPOP	ERG	2	2	88	6380	0.00019025	0.00435842
SPOP	DDIT3	2	2	102	6380	0.000255599	0.00544518
SPOP	DEK	2	2	84	6380	0.000173347	0.00413222
SPOP	PDX1	2	2	78	6380	0.000149468	0.0037393
SPOP	PIP4K2B	2	2	92	6380	0.000207938	0.00459001
SPOP	ZBTB16	2	2	130	6380	0.000415189	0.00706264
SPOP	TRAF1	2	2	82	6380	0.000165191	0.00404362
SPOP	FADD	2	2	100	6380	0.000245674	0.00525846
SPOP	GIT2	2	2	130	6380	0.000415189	0.00706264
SPOP	DUSP7	2	2	85	6380	0.000177499	0.00413341
SPOP	DPPA2	2	2	130	6380	0.000415189	0.00706264
SPOP	SRRM1	2	2	130	6380	0.000415189	0.00706264
SPOP	GCC1	2	2	130	6380	0.000415189	0.00706264
SPOP	MYD88	2	2	97	6380	0.000231154	0.00498429
SPOP	HCST	2	2	130	6380	0.000415189	0.00706264
SPOP	DAXX	2	2	130	6380	0.000415189	0.00706264
SPOP	TRAF6	2	2	79	6380	0.000153325	0.00381132
SPOP	NCOA3	2	2	129	6380	0.000408826	0.00706264
ZEB2	CBX4	2	3	81	17907	6.12e-05	0.00177343
ZEB2	SMAD9	2	3	81	17907	6.12e-05	0.00177343
ZEB2	CTBP2	2	3	81	17907	6.12e-05	0.00177343
ZEB2	UBE2I	2	3	81	17907	6.12e-05	0.00177343
ZEB2	SMAD3	2	3	81	17907	6.12e-05	0.00177343
ZEB2	CTBP1	2	3	81	17907	6.12e-05	0.00177343
ZEB2	SMAD2	2	3	81	17907	6.12e-05	0.00177343
ZEB2	SMAD1	2	3	81	17907	6.12e-05	0.00177343
ZEB2	DKFZp781O1323	2	3	81	17907	6.12e-05	0.00177343
ZEB2	COPS6	2	3	81	17907	6.12e-05	0.00177343
ZEB2	SMAD5	2	3	81	17907	6.12e-05	0.00177343
ZEB2	IQCJ-SCHIP1	2	3	81	17907	6.12e-05	0.00177343
LILRB5	CREB3	2	6	33	6048	0.000440118	0.00706264
SLIT1	MTNR1A	3	6	112	9103	3.62e-05	0.00113949
SLIT1	ATN1	3	6	112	9103	3.62e-05	0.00113949
LDB3	LDB3	2	4	70	6679	0.000649886	0.00923768
LDB3	ACTN2	2	4	70	6679	0.000649886	0.00923768
LDB3	hCG_39985	2	4	70	6679	0.000649886	0.00923768
LDB3	MYOZ3	2	4	70	6679	0.000649886	0.00923768
LDB3	MYOZ1	2	4	70	6679	0.000649886	0.00923768
LDB3	MYOZ2	2	4	70	6679	0.000649886	0.00923768
TRIM3	ACTN4	2	3	40	6710	0.000106186	0.00285429
TRIM3	KIF21B	2	3	40	6710	0.000106186	0.00285429
TRIM3	TRIM3	2	3	40	6710	0.000106186	0.00285429
TRIM3	TNFAIP3	2	3	40	6710	0.000106186	0.00285429
TRIM3	UBE2G2	2	3	40	6710	0.000106186	0.00285429
TRIM3	UBE2K	2	3	40	6710	0.000106186	0.00285429
TRIM3	UBE2U	2	3	40	6710	0.000106186	0.00285429
TRIM3	UBE2D4	2	3	40	6710	0.000106186	0.00285429
TRIM3	MYO5A	2	3	40	6710	0.000106186	0.00285429
GRAP2	GRAP2	2	3	82	6190	0.000521813	0.00774175
GRAP2	EGFR	2	3	82	6190	0.000521813	0.00774175
GRAP2	ERBB2	2	3	82	6190	0.000521813	0.00774175
GRAP2	AR	2	3	82	6190	0.000521813	0.00774175
GRAP2	KIT	2	3	82	6190	0.000521813	0.00774175
GRAP2	USP8	2	3	82	6190	0.000521813	0.00774175
GRAP2	YWHAE	2	3	82	6190	0.000521813	0.00774175
GRAP2	RACK1	2	3	82	6190	0.000521813	0.00774175
GRAP2	SOS2	2	3	82	6190	0.000521813	0.00774175
GRAP2	GOLGA2	2	3	82	6190	0.000521813	0.00774175
GRAP2	GAB1	2	3	82	6190	0.000521813	0.00774175
GRAP2	TSNAXIP1	2	3	82	6190	0.000521813	0.00774175
GRAP2	MTUS2	2	3	82	6190	0.000521813	0.00774175
GRAP2	IHO1	2	3	82	6190	0.000521813	0.00774175
GRAP2	LNX2	2	3	82	6190	0.000521813	0.00774175
GRAP2	CBY2	2	3	82	6190	0.000521813	0.00774175
GRAP2	PNMA1	2	3	82	6190	0.000521813	0.00774175
GRAP2	RIN3	2	3	82	6190	0.000521813	0.00774175
GRAP2	CCHCR1	2	3	82	6190	0.000521813	0.00774175
GRAP2	ZNF526	2	3	82	6190	0.000521813	0.00774175
GRAP2	BLNK	2	3	82	6190	0.000521813	0.00774175
GRAP2	GAB3	2	3	82	6190	0.000521813	0.00774175
GRAP2	MAP4K1	2	3	82	6190	0.000521813	0.00774175
GRAP2	KRTAP4-12	2	3	82	6190	0.000521813	0.00774175
GRAP2	KRTAP4-11	2	3	82	6190	0.000521813	0.00774175
GRAP2	PTPN23	2	3	82	6190	0.000521813	0.00774175
GRAP2	LATS2	2	3	82	6190	0.000521813	0.00774175
GRAP2	ASAP1	2	3	82	6190	0.000521813	0.00774175
GRAP2	COG6	2	3	82	6190	0.000521813	0.00774175
GRAP2	MAGED1	2	3	82	6190	0.000521813	0.00774175
GRAP2	HEL2	2	3	82	6190	0.000521813	0.00774175
PAK3	RAF1	2	2	139	10312	0.000181695	0.00420598
PAK3	ARHGEF7	2	2	138	10312	0.00017909	0.00416336
DFFB	MARCKS	2	2	108	3856	0.000784465	0.00999637
DFFB	LRRK2	2	2	108	3856	0.000784465	0.00999637
RGS11	ADRB2	2	2	134	4798	0.00077999	0.00999637
ABL1	F2RL2	3	4	305	6276	0.00044237	0.00706264
ABL1	DLGAP1	3	4	305	6276	0.00044237	0.00706264
ABL1	NCKAP5	3	4	305	6276	0.00044237	0.00706264
ABL1	SYNJ2	3	4	305	6276	0.00044237	0.00706264
ABL1	ARHGEF11	3	4	305	6276	0.00044237	0.00706264
ABL1	FYB1	3	4	305	6276	0.00044237	0.00706264
ABL1	RTL8C	3	4	305	6276	0.00044237	0.00706264
ABL1	MIA2	3	4	305	6276	0.00044237	0.00706264
ABL1	MSH4	3	4	305	6276	0.00044237	0.00706264
ABL1	MSH5	3	4	305	6276	0.00044237	0.00706264
ABL1	EFS	3	4	305	6276	0.00044237	0.00706264
ABL1	HNRNPR	3	4	305	6276	0.00044237	0.00706264
ABL1	TGOLN2	3	4	305	6276	0.00044237	0.00706264
ABL1	PSTPIP1	3	4	305	6276	0.00044237	0.00706264
ABL1	GSTZ1	3	4	305	6276	0.00044237	0.00706264
ABL1	PRICKLE3	3	4	305	6276	0.00044237	0.00706264
ABL1	AIRE	3	4	305	6276	0.00044237	0.00706264
ABL1	MED14	3	4	305	6276	0.00044237	0.00706264
ABL1	SNX3	3	4	305	6276	0.00044237	0.00706264
ABL1	SLC24A1	3	4	305	6276	0.00044237	0.00706264
ABL1	SEMA7A	3	4	305	6276	0.00044237	0.00706264
ABL1	SLC22A3	3	4	305	6276	0.00044237	0.00706264
ABL1	CDKL5	3	4	305	6276	0.00044237	0.00706264
ABL1	RGS20	3	4	305	6276	0.00044237	0.00706264
ABL1	NFASC	3	4	305	6276	0.00044237	0.00706264
ABL1	NXPH3	3	4	305	6276	0.00044237	0.00706264
ABL1	DLGAP3	3	4	305	6276	0.00044237	0.00706264
ABL1	FN1	3	4	305	6276	0.00044237	0.00706264
ABL1	AHSG	3	4	305	6276	0.00044237	0.00706264
ABL1	HEXA	3	4	305	6276	0.00044237	0.00706264
ABL1	GPX1	3	4	305	6276	0.00044237	0.00706264
ABL1	SP1	3	4	305	6276	0.00044237	0.00706264
ABL1	HSP90AB1	3	4	305	6276	0.00044237	0.00706264
ABL1	ROS1	3	4	305	6276	0.00044237	0.00706264
ABL1	AR	3	4	305	6276	0.00044237	0.00706264
ABL1	VPREB1	3	4	305	6276	0.00044237	0.00706264
ABL1	C6	3	4	305	6276	0.00044237	0.00706264
ABL1	PKM	3	4	305	6276	0.00044237	0.00706264
ABL1	GNS	3	4	305	6276	0.00044237	0.00706264
ABL1	MUC1	3	4	305	6276	0.00044237	0.00706264
ABL1	PTPN1	3	4	305	6276	0.00044237	0.00706264
ABL1	PLCG1	3	4	305	6276	0.00044237	0.00706264
ABL1	OGN	3	4	305	6276	0.00044237	0.00706264
ABL1	CAST	3	4	305	6276	0.00044237	0.00706264
ABL1	FLNA	3	4	305	6276	0.00044237	0.00706264
ABL1	CBL	3	4	305	6276	0.00044237	0.00706264
ABL1	PAX3	3	4	305	6276	0.00044237	0.00706264
ABL1	CNTFR	3	4	305	6276	0.00044237	0.00706264
ABL1	POLD1	3	4	305	6276	0.00044237	0.00706264
ABL1	EPHB2	3	4	305	6276	0.00044237	0.00706264
ABL1	CDC27	3	4	305	6276	0.00044237	0.00706264
ABL1	HOXC8	3	4	305	6276	0.00044237	0.00706264
ABL1	CCKBR	3	4	305	6276	0.00044237	0.00706264
ABL1	BMP8B	3	4	305	6276	0.00044237	0.00706264
ABL1	CTNNB1	3	4	305	6276	0.00044237	0.00706264
ABL1	SPRR2A	3	4	305	6276	0.00044237	0.00706264
ABL1	BRCA1	3	4	305	6276	0.00044237	0.00706264
ABL1	TMPO	3	4	305	6276	0.00044237	0.00706264
ABL1	EPS15	3	4	305	6276	0.00044237	0.00706264
ABL1	NKX2-1	3	4	305	6276	0.00044237	0.00706264
ABL1	MKI67	3	4	305	6276	0.00044237	0.00706264
ABL1	CRKL	3	4	305	6276	0.00044237	0.00706264
ABL1	CENPA	3	4	305	6276	0.00044237	0.00706264
ABL1	LIG3	3	4	305	6276	0.00044237	0.00706264
ABL1	DNM2	3	4	305	6276	0.00044237	0.00706264
ABL1	LRBA	3	4	305	6276	0.00044237	0.00706264
ABL1	BRCA2	3	4	305	6276	0.00044237	0.00706264
ABL1	EFNA5	3	4	305	6276	0.00044237	0.00706264
ABL1	YWHAZ	3	4	305	6276	0.00044237	0.00706264
ABL1	CYP4F2	3	4	305	6276	0.00044237	0.00706264
ABL1	RPP38	3	4	305	6276	0.00044237	0.00706264
ABL1	CNTNAP1	3	4	305	6276	0.00044237	0.00706264
ABL1	SRPK2	3	4	305	6276	0.00044237	0.00706264
ABL1	PKD1	3	4	305	6276	0.00044237	0.00706264
ABL1	LRP2	3	4	305	6276	0.00044237	0.00706264
ABL1	YWHAH	3	4	305	6276	0.00044237	0.00706264
ABL1	DNM1	3	4	305	6276	0.00044237	0.00706264
ABL1	PRDX1	3	4	305	6276	0.00044237	0.00706264
ABL1	SOS2	3	4	305	6276	0.00044237	0.00706264
ABL1	PPP3CA	3	4	305	6276	0.00044237	0.00706264
ABL1	FOXF2	3	4	305	6276	0.00044237	0.00706264
ABL1	ABR	3	4	305	6276	0.00044237	0.00706264
ABL1	AKAP6	3	4	305	6276	0.00044237	0.00706264
ABL1	PDIA2	3	4	305	6276	0.00044237	0.00706264
ABL1	ATM	3	4	305	6276	0.00044237	0.00706264
ABL1	ORC1	3	4	305	6276	0.00044237	0.00706264
ABL1	RIN1	3	4	305	6276	0.00044237	0.00706264
ABL1	RAPGEF1	3	4	305	6276	0.00044237	0.00706264
ABL1	CKAP5	3	4	305	6276	0.00044237	0.00706264
ABL1	FLNC	3	4	305	6276	0.00044237	0.00706264
ABL1	LTBP2	3	4	305	6276	0.00044237	0.00706264
ABL1	CUL7	3	4	305	6276	0.00044237	0.00706264
ABL1	ACAP1	3	4	305	6276	0.00044237	0.00706264
ABL1	SNX17	3	4	305	6276	0.00044237	0.00706264
ABL1	SF3B4	3	4	305	6276	0.00044237	0.00706264
ABL1	SF1	3	4	305	6276	0.00044237	0.00706264
ABL1	LRRK1	3	4	305	6276	0.00044237	0.00706264
ABL1	LRRK2	3	4	305	6276	0.00044237	0.00706264
ABL1	SHE	3	4	305	6276	0.00044237	0.00706264
ABL1	MED25	3	4	305	6276	0.00044237	0.00706264
ABL1	DOK3	3	4	305	6276	0.00044237	0.00706264
ABL1	CSMD2	3	4	305	6276	0.00044237	0.00706264
ABL1	MAVS	3	4	305	6276	0.00044237	0.00706264
ABL1	NEK8	3	4	305	6276	0.00044237	0.00706264
ABL1	RIMS1	3	4	305	6276	0.00044237	0.00706264
ABL1	PDSS2	3	4	305	6276	0.00044237	0.00706264
ABL1	DOCK3	3	4	305	6276	0.00044237	0.00706264
ABL1	ABI1	3	4	305	6276	0.00044237	0.00706264
ABL1	NBEA	3	4	305	6276	0.00044237	0.00706264
ABL1	UHMK1	3	4	305	6276	0.00044237	0.00706264
ABL1	RIN3	3	4	305	6276	0.00044237	0.00706264
ABL1	NELFB	3	4	305	6276	0.00044237	0.00706264
ABL1	NCSTN	3	4	305	6276	0.00044237	0.00706264
ABL1	WASF1	3	4	305	6276	0.00044237	0.00706264
ABL1	GTF3A	3	4	305	6276	0.00044237	0.00706264
ABL1	DNASE1L2	3	4	305	6276	0.00044237	0.00706264
ABL1	MAP4K1	3	4	305	6276	0.00044237	0.00706264
ABL1	DLX4	3	4	305	6276	0.00044237	0.00706264
ABL1	ZDHHC16	3	4	305	6276	0.00044237	0.00706264
ABL1	KIFC2	3	4	305	6276	0.00044237	0.00706264
ABL1	SCARF2	3	4	305	6276	0.00044237	0.00706264
ABL1	SHD	3	4	305	6276	0.00044237	0.00706264
ABL1	ASB16	3	4	305	6276	0.00044237	0.00706264
ABL1	VPS13A	3	4	305	6276	0.00044237	0.00706264
ABL1	GAD1	3	4	305	6276	0.00044237	0.00706264
ABL1	PARK7	3	4	305	6276	0.00044237	0.00706264
ABL1	P2RX7	3	4	305	6276	0.00044237	0.00706264
ABL1	DOK1	3	4	305	6276	0.00044237	0.00706264
ABL1	FAM110A	3	4	305	6276	0.00044237	0.00706264
ABL1	APOL5	3	4	305	6276	0.00044237	0.00706264
ABL1	PRX	3	4	305	6276	0.00044237	0.00706264
ABL1	SHANK3	3	4	305	6276	0.00044237	0.00706264
ABL1	GSX2	3	4	305	6276	0.00044237	0.00706264
ABL1	GRIP2	3	4	305	6276	0.00044237	0.00706264
ABL1	OSBPL5	3	4	305	6276	0.00044237	0.00706264
ABL1	DUSP15	3	4	305	6276	0.00044237	0.00706264
ABL1	CHRD	3	4	305	6276	0.00044237	0.00706264
ABL1	SUV39H2	3	4	305	6276	0.00044237	0.00706264
ABL1	TRIM39	3	4	305	6276	0.00044237	0.00706264
ABL1	NPVF	3	4	305	6276	0.00044237	0.00706264
ABL1	MEPE	3	4	305	6276	0.00044237	0.00706264
ABL1	RTN4	3	4	305	6276	0.00044237	0.00706264
ABL1	TULP4	3	4	305	6276	0.00044237	0.00706264
ABL1	TMEM74B	3	4	305	6276	0.00044237	0.00706264
ABL1	PAG1	3	4	305	6276	0.00044237	0.00706264
ABL1	CELSR3	3	4	305	6276	0.00044237	0.00706264
ABL1	SELENON	3	4	305	6276	0.00044237	0.00706264
ABL1	DLGAP2	3	4	305	6276	0.00044237	0.00706264
ABL1	GABBR1	3	4	305	6276	0.00044237	0.00706264
ABL1	GTF2IRD1	3	4	305	6276	0.00044237	0.00706264
ABL1	BAZ2A	3	4	305	6276	0.00044237	0.00706264
ABL1	TSKS	3	4	305	6276	0.00044237	0.00706264
ABL1	DDX41	3	4	305	6276	0.00044237	0.00706264
ABL1	DKKL1	3	4	305	6276	0.00044237	0.00706264
ABL1	HCN2	3	4	305	6276	0.00044237	0.00706264
ABL1	BRPF3	3	4	305	6276	0.00044237	0.00706264
ABL1	ASAP1	3	4	305	6276	0.00044237	0.00706264
ABL1	NOTCH3	3	4	305	6276	0.00044237	0.00706264
ABL1	KMT2B	3	4	305	6276	0.00044237	0.00706264
ABL1	SNX12	3	4	305	6276	0.00044237	0.00706264
ABL1	PCDHA7	3	4	305	6276	0.00044237	0.00706264
ABL1	G3BP2	3	4	305	6276	0.00044237	0.00706264
ABL1	DNM3	3	4	305	6276	0.00044237	0.00706264
ABL1	DLGAP4	3	4	305	6276	0.00044237	0.00706264
ABL1	EPB41L3	3	4	305	6276	0.00044237	0.00706264
ABL1	SH3BP1	3	4	305	6276	0.00044237	0.00706264
ABL1	HCN4	3	4	305	6276	0.00044237	0.00706264
ABL1	WNK2	3	4	305	6276	0.00044237	0.00706264
ABL1	CD2AP	3	4	305	6276	0.00044237	0.00706264
ABL1	SNX8	3	4	305	6276	0.00044237	0.00706264
ABL1	GPR45	3	4	305	6276	0.00044237	0.00706264
ABL1	NFS1	3	4	305	6276	0.00044237	0.00706264
ABL1	ROBO1	3	4	305	6276	0.00044237	0.00706264
EGFR	SH3D21	12	20	280	12961	2.22e-16	3.46e-14
EGFR	CALM3	12	20	280	12961	2.22e-16	3.46e-14
EGFR	RUTBC1	12	20	280	12961	2.22e-16	3.46e-14
EGFR	AIP	13	20	475	12961	1.21e-14	1.05e-12
EGFR	APBB1	12	20	280	12961	2.22e-16	3.46e-14
EGFR	WASL	12	20	280	12961	2.22e-16	3.46e-14
EGFR	PIK3R2	12	20	280	12961	2.22e-16	3.46e-14
EGFR	PIK3C2B	12	20	280	12961	2.22e-16	3.46e-14
EGFR	SOCS3	13	20	475	12961	1.21e-14	1.05e-12
EGFR	SOCS6	12	20	280	12961	2.22e-16	3.46e-14
EGFR	IRS4	12	20	280	12961	2.22e-16	3.46e-14
EGFR	PSMA7	13	20	475	12961	1.21e-14	1.05e-12
EGFR	SCAMP3	12	20	280	12961	2.22e-16	3.46e-14
EGFR	PLD2	12	20	280	12961	2.22e-16	3.46e-14
EGFR	AURKA	13	20	475	12961	1.21e-14	1.05e-12
EGFR	DEGS1	12	20	280	12961	2.22e-16	3.46e-14
EGFR	SCAMP1	12	20	280	12961	2.22e-16	3.46e-14
EGFR	PLSCR1	12	20	280	12961	2.22e-16	3.46e-14
EGFR	RGS16	13	20	475	12961	1.21e-14	1.05e-12
EGFR	ARPC5	13	20	475	12961	1.21e-14	1.05e-12
EGFR	SGSM2	12	20	280	12961	2.22e-16	3.46e-14
EGFR	LAT	12	20	280	12961	2.22e-16	3.46e-14
EGFR	NCK2	12	20	280	12961	2.22e-16	3.46e-14
EGFR	ACTN4	13	20	475	12961	1.21e-14	1.05e-12
EGFR	CALU	12	20	280	12961	2.22e-16	3.46e-14
EGFR	TLR2	13	20	475	12961	1.21e-14	1.05e-12
EGFR	JAK2	2	20	15	12961	0.000250975	0.00536771
EGFR	CTNND1	13	20	475	12961	1.21e-14	1.05e-12
EGFR	SH2D1A	13	20	475	12961	1.21e-14	1.05e-12
EGFR	MEGF6	12	20	280	12961	2.22e-16	3.46e-14
EGFR	DNAJC13	12	20	280	12961	2.22e-16	3.46e-14
EGFR	ZPR1	13	20	475	12961	1.21e-14	1.05e-12
EGFR	SH3BGRL	13	20	475	12961	1.21e-14	1.05e-12
EGFR	FRAT2	12	20	280	12961	2.22e-16	3.46e-14
EGFR	TOM1L1	12	20	280	12961	2.22e-16	3.46e-14
EGFR	GRAP2	12	20	280	12961	2.22e-16	3.46e-14
EGFR	STAM2	12	20	280	12961	2.22e-16	3.46e-14
EGFR	SORBS2	12	20	280	12961	2.22e-16	3.46e-14
EGFR	HEXIM1	12	20	280	12961	2.22e-16	3.46e-14
EGFR	AHSA1	12	20	280	12961	2.22e-16	3.46e-14
EGFR	APBB3	12	20	280	12961	2.22e-16	3.46e-14
EGFR	APBA3	12	20	280	12961	2.22e-16	3.46e-14
EGFR	EGFR	13	20	301	12961	6.66e-16	1.03e-13
EGFR	TGFB1	12	20	280	12961	2.22e-16	3.46e-14
EGFR	FN1	12	20	280	12961	2.22e-16	3.46e-14
EGFR	ALDOA	13	20	475	12961	1.21e-14	1.05e-12
EGFR	ANXA1	13	20	475	12961	1.21e-14	1.05e-12
EGFR	NR3C1	12	20	280	12961	2.22e-16	3.46e-14
EGFR	GAPDH	13	20	475	12961	1.21e-14	1.05e-12
EGFR	APP	12	20	280	12961	2.22e-16	3.46e-14
EGFR	ITGB2	13	20	475	12961	1.21e-14	1.05e-12
EGFR	ITGB1	12	20	280	12961	2.22e-16	3.46e-14
EGFR	PRKCB	13	20	478	12961	1.42e-14	1.22e-12
EGFR	UROD	13	20	475	12961	1.21e-14	1.05e-12
EGFR	GSN	13	20	475	12961	1.21e-14	1.05e-12
EGFR	CDK1	13	20	475	12961	1.21e-14	1.05e-12
EGFR	DCN	13	20	475	12961	1.21e-14	1.05e-12
EGFR	HSP90AA1	13	20	475	12961	1.21e-14	1.05e-12
EGFR	HSP90AB1	13	20	475	12961	1.21e-14	1.05e-12
EGFR	PTPRC	12	20	280	12961	2.22e-16	3.46e-14
EGFR	TPM1	12	20	280	12961	2.22e-16	3.46e-14
EGFR	FGR	13	20	475	12961	1.21e-14	1.05e-12
EGFR	UCHL1	13	20	475	12961	1.21e-14	1.05e-12
EGFR	HSPA1A	12	20	280	12961	2.22e-16	3.46e-14
EGFR	AR	12	20	280	12961	2.22e-16	3.46e-14
EGFR	TXN	13	20	475	12961	1.21e-14	1.05e-12
EGFR	MAPT	12	20	280	12961	2.22e-16	3.46e-14
EGFR	HSPA8	13	20	475	12961	1.21e-14	1.05e-12
EGFR	LAMP1	12	20	280	12961	2.22e-16	3.46e-14
EGFR	PIM1	13	20	475	12961	1.21e-14	1.05e-12
EGFR	PCNA	13	20	475	12961	1.21e-14	1.05e-12
EGFR	CDH1	13	20	475	12961	1.21e-14	1.05e-12
EGFR	CD59	13	20	475	12961	1.21e-14	1.05e-12
EGFR	PKM	13	20	475	12961	1.21e-14	1.05e-12
EGFR	HSP90B1	12	20	280	12961	2.22e-16	3.46e-14
EGFR	JUP	13	20	475	12961	1.21e-14	1.05e-12
EGFR	EZR	13	20	475	12961	1.21e-14	1.05e-12
EGFR	VAV1	13	20	475	12961	1.21e-14	1.05e-12
EGFR	AREG	12	20	280	12961	2.22e-16	3.46e-14
EGFR	MUC1	12	20	280	12961	2.22e-16	3.46e-14
EGFR	CD44	12	20	280	12961	2.22e-16	3.46e-14
EGFR	CBR1	13	20	475	12961	1.21e-14	1.05e-12
EGFR	PDGFRA	3	20	19	12961	3.52e-06	0.000139503
EGFR	NCK1	12	20	280	12961	2.22e-16	3.46e-14
EGFR	PLCG2	12	20	280	12961	2.22e-16	3.46e-14
EGFR	FAH	13	20	475	12961	1.21e-14	1.05e-12
EGFR	GOT1	13	20	475	12961	1.21e-14	1.05e-12
EGFR	PRKCA	13	20	475	12961	1.21e-14	1.05e-12
EGFR	SYN1	12	20	280	12961	2.22e-16	3.46e-14
EGFR	PRKACA	13	20	475	12961	1.21e-14	1.05e-12
EGFR	PTPN1	13	20	475	12961	1.21e-14	1.05e-12
EGFR	ARF4	13	20	475	12961	1.21e-14	1.05e-12
EGFR	PLCG1	12	20	280	12961	2.22e-16	3.46e-14
EGFR	TNFRSF1A	12	20	280	12961	2.22e-16	3.46e-14
EGFR	RAB3A	13	20	475	12961	1.21e-14	1.05e-12
EGFR	RASA1	12	20	280	12961	2.22e-16	3.46e-14
EGFR	CSRP1	13	20	478	12961	1.42e-14	1.22e-12
EGFR	ERBB3	4	20	44	12961	6.16e-07	2.59e-05
EGFR	PTPRB	12	20	280	12961	2.22e-16	3.46e-14
EGFR	CFL1	13	20	475	12961	1.21e-14	1.05e-12
EGFR	S100A4	13	20	475	12961	1.21e-14	1.05e-12
EGFR	EEF1G	12	20	280	12961	2.22e-16	3.46e-14
EGFR	YWHAQ	13	20	475	12961	1.21e-14	1.05e-12
EGFR	PIK3R1	12	20	280	12961	2.22e-16	3.46e-14
EGFR	PTPN6	13	20	475	12961	1.21e-14	1.05e-12
EGFR	SHC1	12	20	280	12961	2.22e-16	3.46e-14
EGFR	CASP1	13	20	475	12961	1.21e-14	1.05e-12
EGFR	CDC25A	12	20	280	12961	2.22e-16	3.46e-14
EGFR	CDC25C	12	20	280	12961	2.22e-16	3.46e-14
EGFR	PRKAR1B	13	20	475	12961	1.21e-14	1.05e-12
EGFR	AKT1	13	20	475	12961	1.21e-14	1.05e-12
EGFR	ATIC	13	20	475	12961	1.21e-14	1.05e-12
EGFR	YWHAB	13	20	475	12961	1.21e-14	1.05e-12
EGFR	SFN	13	20	475	12961	1.21e-14	1.05e-12
EGFR	STIP1	12	20	280	12961	2.22e-16	3.46e-14
EGFR	ARRB2	13	20	475	12961	1.21e-14	1.05e-12
EGFR	HSPA4	13	20	475	12961	1.21e-14	1.05e-12
EGFR	ATP5F1C	13	20	475	12961	1.21e-14	1.05e-12
EGFR	PPARG	13	20	475	12961	1.21e-14	1.05e-12
EGFR	SNCA	13	20	475	12961	1.21e-14	1.05e-12
EGFR	HSPA9	13	20	475	12961	1.21e-14	1.05e-12
EGFR	MPV17	12	20	280	12961	2.22e-16	3.46e-14
EGFR	STAT3	13	20	475	12961	1.21e-14	1.05e-12
EGFR	USP8	12	20	280	12961	2.22e-16	3.46e-14
EGFR	MDH1	12	20	280	12961	2.22e-16	3.46e-14
EGFR	PTGDS	9	20	163	12961	1.17e-12	8.59e-11
EGFR	STAT1	13	20	475	12961	1.21e-14	1.05e-12
EGFR	STAT5A	13	20	475	12961	1.21e-14	1.05e-12
EGFR	EPS15	12	20	280	12961	2.22e-16	3.46e-14
EGFR	CASP3	13	20	475	12961	1.21e-14	1.05e-12
EGFR	ABL2	3	20	23	12961	6.23e-06	0.000233284
EGFR	MATR3	12	20	280	12961	2.22e-16	3.46e-14
EGFR	MAPK8	13	20	475	12961	1.21e-14	1.05e-12
EGFR	MAPK9	13	20	475	12961	1.21e-14	1.05e-12
EGFR	CRK	13	20	475	12961	1.21e-14	1.05e-12
EGFR	CRKL	13	20	475	12961	1.21e-14	1.05e-12
EGFR	NEDD4	12	20	280	12961	2.22e-16	3.46e-14
EGFR	CAMLG	12	20	280	12961	2.22e-16	3.46e-14
EGFR	ARRB1	13	20	475	12961	1.21e-14	1.05e-12
EGFR	NUMB	12	20	280	12961	2.22e-16	3.46e-14
EGFR	RGS4	13	20	475	12961	1.21e-14	1.05e-12
EGFR	SELENOP	12	20	280	12961	2.22e-16	3.46e-14
EGFR	EMD	12	20	280	12961	2.22e-16	3.46e-14
EGFR	DUSP3	13	20	475	12961	1.21e-14	1.05e-12
EGFR	CAV2	12	20	280	12961	2.22e-16	3.46e-14
EGFR	STAT5B	13	20	475	12961	1.21e-14	1.05e-12
EGFR	RAP1GDS1	13	20	475	12961	1.21e-14	1.05e-12
EGFR	STAT2	13	20	475	12961	1.21e-14	1.05e-12
EGFR	VAV2	13	20	475	12961	1.21e-14	1.05e-12
EGFR	PPP5C	13	20	475	12961	1.21e-14	1.05e-12
EGFR	OAZ1	13	20	475	12961	1.21e-14	1.05e-12
EGFR	PSMD4	13	20	475	12961	1.21e-14	1.05e-12
EGFR	CASP7	13	20	475	12961	1.21e-14	1.05e-12
EGFR	STX17	12	20	280	12961	2.22e-16	3.46e-14
EGFR	TPI1	13	20	475	12961	1.21e-14	1.05e-12
EGFR	SEC61B	12	20	280	12961	2.22e-16	3.46e-14
EGFR	GABARAPL2	13	20	475	12961	1.21e-14	1.05e-12
EGFR	SNAP25	12	20	280	12961	2.22e-16	3.46e-14
EGFR	CALM1	13	20	475	12961	1.21e-14	1.05e-12
EGFR	ARF6	13	20	475	12961	1.21e-14	1.05e-12
EGFR	PPP2CB	13	20	475	12961	1.21e-14	1.05e-12
EGFR	GRB2	13	20	475	12961	1.21e-14	1.05e-12
EGFR	YWHAZ	13	20	475	12961	1.21e-14	1.05e-12
EGFR	ACTA1	12	20	280	12961	2.22e-16	3.46e-14
EGFR	c-fgr	12	20	280	12961	2.22e-16	3.46e-14
EGFR	FANCC	12	20	280	12961	2.22e-16	3.46e-14
EGFR	PRKCE	12	20	280	12961	2.22e-16	3.46e-14
EGFR	CNTN2	12	20	280	12961	2.22e-16	3.46e-14
EGFR	FKBP4	13	20	475	12961	1.21e-14	1.05e-12
EGFR	AKAP12	12	20	280	12961	2.22e-16	3.46e-14
EGFR	CAV1	12	20	280	12961	2.22e-16	3.46e-14
EGFR	PTPN12	12	20	280	12961	2.22e-16	3.46e-14
EGFR	PRKCZ	13	20	475	12961	1.21e-14	1.05e-12
EGFR	PRKCD	12	20	280	12961	2.22e-16	3.46e-14
EGFR	PTPN11	13	20	475	12961	1.21e-14	1.05e-12
EGFR	PRDX1	13	20	475	12961	1.21e-14	1.05e-12
EGFR	SOS2	13	20	475	12961	1.21e-14	1.05e-12
EGFR	LRP1	12	20	280	12961	2.22e-16	3.46e-14
EGFR	ITK	8	20	46	12961	2.11e-15	3.21e-13
EGFR	AHNAK	12	20	280	12961	2.22e-16	3.46e-14
EGFR	MAP3K12	12	20	280	12961	2.22e-16	3.46e-14
EGFR	PTPRJ	12	20	280	12961	2.22e-16	3.46e-14
EGFR	EPS8	12	20	280	12961	2.22e-16	3.46e-14
EGFR	TRAF2	12	20	280	12961	2.22e-16	3.46e-14
EGFR	LCP2	12	20	280	12961	2.22e-16	3.46e-14
EGFR	PAK1	13	20	475	12961	1.21e-14	1.05e-12
EGFR	SLA	13	20	475	12961	1.21e-14	1.05e-12
EGFR	GRB10	12	20	280	12961	2.22e-16	3.46e-14
EGFR	MAPK8IP2	12	20	280	12961	2.22e-16	3.46e-14
EGFR	FKBP5	13	20	475	12961	1.21e-14	1.05e-12
EGFR	GAB1	12	20	280	12961	2.22e-16	3.46e-14
EGFR	GPM6B	12	20	280	12961	2.22e-16	3.46e-14
EGFR	PICALM	12	20	280	12961	2.22e-16	3.46e-14
EGFR	DCTN2	12	20	280	12961	2.22e-16	3.46e-14
EGFR	SNX1	12	20	280	12961	2.22e-16	3.46e-14
EGFR	RIN1	12	20	280	12961	2.22e-16	3.46e-14
EGFR	RAPGEF1	12	20	280	12961	2.22e-16	3.46e-14
EGFR	COL9A3	12	20	280	12961	2.22e-16	3.46e-14
EGFR	CYLC2	12	20	280	12961	2.22e-16	3.46e-14
EGFR	KEAP1	12	20	280	12961	2.22e-16	3.46e-14
EGFR	ARHGEF7	12	20	280	12961	2.22e-16	3.46e-14
EGFR	DYNC1H1	13	20	475	12961	1.21e-14	1.05e-12
EGFR	CTTN	12	20	280	12961	2.22e-16	3.46e-14
EGFR	FKBP8	12	20	280	12961	2.22e-16	3.46e-14
EGFR	GRB14	12	20	280	12961	2.22e-16	3.46e-14
EGFR	GRB7	12	20	280	12961	2.22e-16	3.46e-14
EGFR	BECN1	12	20	280	12961	2.22e-16	3.46e-14
EGFR	SPARCL1	12	20	280	12961	2.22e-16	3.46e-14
EGFR	SPCS2	12	20	280	12961	2.22e-16	3.46e-14
EGFR	EEA1	12	20	280	12961	2.22e-16	3.46e-14
EGFR	PDK3	13	20	475	12961	1.21e-14	1.05e-12
EGFR	PRKD1	12	20	280	12961	2.22e-16	3.46e-14
EGFR	TAB1	13	20	475	12961	1.21e-14	1.05e-12
EGFR	UBE2V2	4	20	167	12961	0.0001132	0.00293985
EGFR	ADRM1	13	20	475	12961	1.21e-14	1.05e-12
EGFR	MAPK14	13	20	475	12961	1.21e-14	1.05e-12
EGFR	CDC37	13	20	475	12961	1.21e-14	1.05e-12
EGFR	MAPKAPK3	13	20	475	12961	1.21e-14	1.05e-12
EGFR	LRRK1	12	20	280	12961	2.22e-16	3.46e-14
EGFR	PLCH1	12	20	280	12961	2.22e-16	3.46e-14
EGFR	DKFZp686J1568	12	20	280	12961	2.22e-16	3.46e-14
EGFR	TSTD2	12	20	280	12961	2.22e-16	3.46e-14
EGFR	TNS3	12	20	280	12961	2.22e-16	3.46e-14
EGFR	DOK6	12	20	280	12961	2.22e-16	3.46e-14
EGFR	SHC4	12	20	280	12961	2.22e-16	3.46e-14
EGFR	TMCO3	12	20	280	12961	2.22e-16	3.46e-14
EGFR	TUBA1A	13	20	475	12961	1.21e-14	1.05e-12
EGFR	KCTD9	12	20	280	12961	2.22e-16	3.46e-14
EGFR	CLNK	12	20	280	12961	2.22e-16	3.46e-14
EGFR	LAPTM4B	12	20	280	12961	2.22e-16	3.46e-14
EGFR	NUDCD3	12	20	280	12961	2.22e-16	3.46e-14
EGFR	CMTM8	12	20	280	12961	2.22e-16	3.46e-14
EGFR	TNS4	12	20	280	12961	2.22e-16	3.46e-14
EGFR	CEND1	5	20	99	12961	3.66e-07	1.56e-05
EGFR	RUSC2	12	20	280	12961	2.22e-16	3.46e-14
EGFR	SH2D3C	12	20	280	12961	2.22e-16	3.46e-14
EGFR	FBXO25	12	20	280	12961	2.22e-16	3.46e-14
EGFR	MGARP	12	20	280	12961	2.22e-16	3.46e-14
EGFR	CHD5	12	20	280	12961	2.22e-16	3.46e-14
EGFR	DOK4	12	20	280	12961	2.22e-16	3.46e-14
EGFR	FRS2	12	20	280	12961	2.22e-16	3.46e-14
EGFR	HDAC7	12	20	280	12961	2.22e-16	3.46e-14
EGFR	PDCD6IP	13	20	475	12961	1.21e-14	1.05e-12
EGFR	RIN2	12	20	280	12961	2.22e-16	3.46e-14
EGFR	SHC3	12	20	280	12961	2.22e-16	3.46e-14
EGFR	PIK3R3	13	20	475	12961	1.21e-14	1.05e-12
EGFR	PTPRU	12	20	280	12961	2.22e-16	3.46e-14
EGFR	PRCC	12	20	280	12961	2.22e-16	3.46e-14
EGFR	APBB2	12	20	280	12961	2.22e-16	3.46e-14
EGFR	MAP4K1	12	20	280	12961	2.22e-16	3.46e-14
EGFR	PNPLA2	12	20	280	12961	2.22e-16	3.46e-14
EGFR	AP2M1	13	20	475	12961	1.21e-14	1.05e-12
EGFR	DCBLD2	12	20	280	12961	2.22e-16	3.46e-14
EGFR	SYNGAP1	12	20	280	12961	2.22e-16	3.46e-14
EGFR	PIGS	12	20	280	12961	2.22e-16	3.46e-14
EGFR	NIBAN2	12	20	280	12961	2.22e-16	3.46e-14
EGFR	CYTH2	13	20	475	12961	1.21e-14	1.05e-12
EGFR	NDN	12	20	280	12961	2.22e-16	3.46e-14
EGFR	DOK1	12	20	280	12961	2.22e-16	3.46e-14
EGFR	MAP3K3	12	20	280	12961	2.22e-16	3.46e-14
EGFR	OLFM1	13	20	475	12961	1.21e-14	1.05e-12
EGFR	PTPN18	13	20	475	12961	1.21e-14	1.05e-12
EGFR	SH3GL2	13	20	475	12961	1.21e-14	1.05e-12
EGFR	SH3GL3	13	20	475	12961	1.21e-14	1.05e-12
EGFR	SH2D3A	13	20	475	12961	1.21e-14	1.05e-12
EGFR	TRMO	12	20	280	12961	2.22e-16	3.46e-14
EGFR	RNF126	12	20	280	12961	2.22e-16	3.46e-14
EGFR	HEMGN	12	20	280	12961	2.22e-16	3.46e-14
EGFR	VPS33B	13	20	478	12961	1.42e-14	1.22e-12
EGFR	SH3BGRL3	13	20	475	12961	1.21e-14	1.05e-12
EGFR	SLA2	13	20	475	12961	1.21e-14	1.05e-12
EGFR	DNAJC4	12	20	280	12961	2.22e-16	3.46e-14
EGFR	SH2D2A	12	20	280	12961	2.22e-16	3.46e-14
EGFR	NANS	13	20	478	12961	1.42e-14	1.22e-12
EGFR	SH2B1	12	20	280	12961	2.22e-16	3.46e-14
EGFR	CISH	13	20	475	12961	1.21e-14	1.05e-12
EGFR	ITSN2	12	20	280	12961	2.22e-16	3.46e-14
EGFR	VAPA	13	20	475	12961	1.21e-14	1.05e-12
EGFR	DOK5	12	20	280	12961	2.22e-16	3.46e-14
EGFR	HDAC6	12	20	280	12961	2.22e-16	3.46e-14
EGFR	DKFZp434N101	12	20	280	12961	2.22e-16	3.46e-14
EGFR	STAP2	12	20	280	12961	2.22e-16	3.46e-14
EGFR	RABGEF1	12	20	280	12961	2.22e-16	3.46e-14
EGFR	APPL1	13	20	475	12961	1.21e-14	1.05e-12
EGFR	AGO2	13	20	475	12961	1.21e-14	1.05e-12
EGFR	VAV3	13	20	475	12961	1.21e-14	1.05e-12
EGFR	STUB1	12	20	280	12961	2.22e-16	3.46e-14
EGFR	EXOC7	13	20	475	12961	1.21e-14	1.05e-12
EGFR	WASF3	12	20	280	12961	2.22e-16	3.46e-14
EGFR	BAIAP2	12	20	280	12961	2.22e-16	3.46e-14
EGFR	MAPK8IP1	12	20	280	12961	2.22e-16	3.46e-14
EGFR	CAMK2A	13	20	475	12961	1.21e-14	1.05e-12
EGFR	SH2B3	12	20	280	12961	2.22e-16	3.46e-14
EGFR	PIN4	13	20	475	12961	1.21e-14	1.05e-12
EGFR	ZNF510	12	20	280	12961	2.22e-16	3.46e-14
EGFR	MAST1	12	20	280	12961	2.22e-16	3.46e-14
EGFR	PTPN22	12	20	280	12961	2.22e-16	3.46e-14
EGFR	MOB4	13	20	475	12961	1.21e-14	1.05e-12
EGFR	TLN1	12	20	280	12961	2.22e-16	3.46e-14
EGFR	CTG3a	12	20	280	12961	2.22e-16	3.46e-14
EGFR	RNF115	12	20	280	12961	2.22e-16	3.46e-14
EGFR	SNX9	13	20	475	12961	1.21e-14	1.05e-12
EGFR	IKBKG	12	20	280	12961	2.22e-16	3.46e-14
EGFR	NUMBL	12	20	280	12961	2.22e-16	3.46e-14
EGFR	CAPN7	12	20	280	12961	2.22e-16	3.46e-14
EGFR	HEL-S-162eP	13	20	475	12961	1.21e-14	1.05e-12
EGFR	HEL-S-72p	13	20	475	12961	1.21e-14	1.05e-12
EGFR	HEL-S-77	12	20	280	12961	2.22e-16	3.46e-14
EGFR	HEL-S-94n	12	20	280	12961	2.22e-16	3.46e-14
EGFR	HEL-117	13	20	475	12961	1.21e-14	1.05e-12
EGFR	HEL-S-1	13	20	475	12961	1.21e-14	1.05e-12
EGFR	HEL-S-22	12	20	280	12961	2.22e-16	3.46e-14
EGFR	HEL-S-32	13	20	475	12961	1.21e-14	1.05e-12
EGFR	HEL-S-70p	13	20	475	12961	1.21e-14	1.05e-12
EGFR	HEL-S-15	13	20	475	12961	1.21e-14	1.05e-12
EGFR	HEL-S-49	13	20	475	12961	1.21e-14	1.05e-12
EGFR	HEL-S-87p	13	20	475	12961	1.21e-14	1.05e-12
EGFR	HEL-S-125m	13	20	475	12961	1.21e-14	1.05e-12
KRAS	PIK3R2	5	5	95	7302	3.73e-10	2.13e-08
KRAS	PDE6D	5	5	51	7302	1.66e-11	1.17e-09
KRAS	FRAT2	5	5	94	7302	3.54e-10	2.03e-08
KRAS	ZNF189	5	5	94	7302	3.54e-10	2.03e-08
KRAS	TNFSF13	2	5	53	7302	0.000519221	0.00774175
KRAS	DIRAS3	2	5	51	7302	0.000481038	0.00749907
KRAS	MOCS2	2	5	51	7302	0.000481038	0.00749907
KRAS	MT-CYB	5	5	96	7302	3.93e-10	2.23e-08
KRAS	MT-CO3	5	5	94	7302	3.54e-10	2.03e-08
KRAS	QDPR	5	5	50	7302	1.51e-11	1.07e-09
KRAS	CCL5	2	5	61	7302	0.000686285	0.00950931
KRAS	PSMA3	5	5	51	7302	1.66e-11	1.17e-09
KRAS	ADH6	5	5	51	7302	1.66e-11	1.17e-09
KRAS	UQCRC1	2	5	52	7302	0.00049995	0.00770669
KRAS	SERPINB5	5	5	57	7302	2.9e-11	1.8e-09
KRAS	PIK3CA	5	5	96	7302	3.93e-10	2.23e-08
KRAS	CDK8	2	5	49	7302	0.000444294	0.00706492
KRAS	RAP1GDS1	5	5	54	7302	2.21e-11	1.54e-09
KRAS	CALM1	2	5	53	7302	0.000519221	0.00774175
KRAS	PPP2CB	2	5	50	7302	0.000462486	0.00726183
KRAS	EEF1A1	2	5	49	7302	0.000444294	0.00706492
KRAS	CYB	5	5	96	7302	3.93e-10	2.23e-08
KRAS	IL24	2	5	60	7302	0.000664151	0.00929934
KRAS	PDE4DIP	5	5	95	7302	3.73e-10	2.13e-08
KRAS	COX3	5	5	96	7302	3.93e-10	2.23e-08
KRAS	LPAR1	5	5	59	7302	3.44e-11	2.13e-09
KRAS	THRSP	5	5	51	7302	1.66e-11	1.17e-09
KRAS	CCT7	2	5	50	7302	0.000462486	0.00726183
KRAS	HEMGN	5	5	94	7302	3.54e-10	2.03e-08
KRAS	EGLN1	2	5	49	7302	0.000444294	0.00706492
KRAS	DDX47	5	5	51	7302	1.66e-11	1.17e-09
KRAS	SHOC2	2	5	50	7302	0.000462486	0.00726183
LDLR	LDLR	3	3	347	7718	9.09e-05	0.00254701
TP53	CABL1	10	29	130	3924	1.79e-08	8.84e-07
TP53	HSPA1B	10	29	115	3924	5.61e-09	2.98e-07
TP53	NR1i1	10	29	126	3924	1.33e-08	6.72e-07
TP53	PSMD11	8	29	81	3924	9.6e-08	4.2e-06
TP53	DVL2	13	29	157	3924	2.5e-11	1.56e-09
TP53	CHEK1	13	29	108	3924	2.35e-13	1.76e-11
TP53	IKBKB	13	29	111	3924	3.3e-13	2.46e-11
TP53	AURKA	11	29	107	3924	1.36e-10	7.89e-09
TP53	SCAMP1	9	29	106	3924	4.69e-08	2.1e-06
TP53	DLEU1	13	29	157	3924	2.5e-11	1.56e-09
TP53	FOXO3	13	29	157	3924	2.5e-11	1.56e-09
TP53	PRKAB2	12	29	106	3924	5.1e-12	3.72e-10
TP53	NUAK1	10	29	130	3924	1.79e-08	8.84e-07
TP53	KDM1A	9	29	99	3924	2.62e-08	1.2e-06
TP53	SIN3B	15	29	173	3924	2e-13	1.51e-11
TP53	PIAS1	13	29	157	3924	2.5e-11	1.56e-09
TP53	PIAS2	13	29	157	3924	2.5e-11	1.56e-09
TP53	MTA2	15	29	173	3924	2e-13	1.51e-11
TP53	ARIH2	10	29	104	3924	2.16e-09	1.17e-07
TP53	BAG2	10	29	124	3924	1.14e-08	5.83e-07
TP53	EFEMP2	15	29	173	3924	2e-13	1.51e-11
TP53	PTTG1	10	29	128	3924	1.54e-08	7.7e-07
TP53	CHEK2	13	29	162	3924	3.68e-11	2.22e-09
TP53	PNP	9	29	100	3924	2.86e-08	1.31e-06
TP53	AGT	13	29	176	3924	1.02e-10	5.97e-09
TP53	APOH	9	29	104	3924	3.99e-08	1.8e-06
TP53	TK1	8	29	94	3924	2.97e-07	1.27e-05
TP53	S100B	8	29	94	3924	2.97e-07	1.27e-05
TP53	TP53	22	29	163	3924	1.22e-15	1.87e-13
TP53	HSPB1	9	29	106	3924	4.69e-08	2.1e-06
TP53	S100A8	10	29	97	3924	1.11e-09	6.16e-08
TP53	TFAP2A	10	29	118	3924	7.16e-09	3.73e-07
TP53	CDK1	10	29	104	3924	2.16e-09	1.17e-07
TP53	S100A6	9	29	104	3924	3.99e-08	1.8e-06
TP53	NPM1	9	29	98	3924	2.4e-08	1.15e-06
TP53	HSP90AA1	9	29	86	3924	7.85e-09	4.08e-07
TP53	SP1	13	29	157	3924	2.5e-11	1.56e-09
TP53	HSP90AB1	13	29	162	3924	3.68e-11	2.22e-09
TP53	PARP1	13	29	157	3924	2.5e-11	1.56e-09
TP53	UBC	13	29	157	3924	2.5e-11	1.56e-09
TP53	HSPA1A	15	29	173	3924	2e-13	1.51e-11
TP53	AR	16	29	144	3924	4.44e-16	6.88e-14
TP53	BCL2	13	29	108	3924	2.35e-13	1.76e-11
TP53	TXN	9	29	110	3924	6.43e-08	2.87e-06
TP53	HSPA8	13	29	176	3924	1.02e-10	5.97e-09
TP53	BCR	13	29	157	3924	2.5e-11	1.56e-09
TP53	TOP1	13	29	176	3924	1.02e-10	5.97e-09
TP53	VDR	9	29	103	3924	3.68e-08	1.67e-06
TP53	ANXA3	8	29	87	3924	1.65e-07	7.17e-06
TP53	XRCC6	13	29	176	3924	1.02e-10	5.97e-09
TP53	BMP1	13	29	157	3924	2.5e-11	1.56e-09
TP53	TPT1	12	29	112	3924	9.64e-12	6.94e-10
TP53	TRIM27	11	29	106	3924	1.23e-10	7.18e-09
TP53	NQO1	14	29	125	3924	5.37e-14	4.59e-12
TP53	MUC1	15	29	173	3924	2e-13	1.51e-11
TP53	PLCG2	15	29	173	3924	2e-13	1.51e-11
TP53	ZNF24	13	29	157	3924	2.5e-11	1.56e-09
TP53	CEBPB	10	29	118	3924	7.16e-09	3.73e-07
TP53	DDX5	13	29	176	3924	1.02e-10	5.97e-09
TP53	EGR1	15	29	173	3924	2e-13	1.51e-11
TP53	GPX2	10	29	101	3924	1.63e-09	8.93e-08
TP53	RCC1	7	29	79	3924	1.42e-06	5.79e-05
TP53	ATF3	9	29	102	3924	3.38e-08	1.54e-06
TP53	NCL	13	29	157	3924	2.5e-11	1.56e-09
TP53	ERCC3	10	29	116	3924	6.09e-09	3.21e-07
TP53	EIF2AK2	13	29	176	3924	1.02e-10	5.97e-09
TP53	CR2	15	29	173	3924	2e-13	1.51e-11
TP53	EIF2S2	9	29	96	3924	2.02e-08	9.96e-07
TP53	ANXA7	13	29	162	3924	3.68e-11	2.22e-09
TP53	TBP	13	29	107	3924	2.07e-13	1.56e-11
TP53	RAB4A	9	29	92	3924	1.4e-08	7.05e-07
TP53	SAT1	9	29	97	3924	2.2e-08	1.08e-06
TP53	NR4A1	15	29	173	3924	2e-13	1.51e-11
TP53	S100A1	10	29	100	3924	1.48e-09	8.14e-08
TP53	RPS3	14	29	108	3924	9.1e-15	1.05e-12
TP53	GADD45A	8	29	95	3924	3.21e-07	1.38e-05
TP53	CDK2	9	29	108	3924	5.5e-08	2.46e-06
TP53	YY1	10	29	117	3924	6.61e-09	3.46e-07
TP53	NFKBIA	9	29	104	3924	3.99e-08	1.8e-06
TP53	APEX1	11	29	84	3924	1.05e-11	7.52e-10
TP53	MSX1	10	29	119	3924	7.76e-09	4.04e-07
TP53	MAPK1	8	29	93	3924	2.74e-07	1.18e-05
TP53	S100A2	13	29	110	3924	2.93e-13	2.19e-11
TP53	PML	15	29	173	3924	2e-13	1.51e-11
TP53	RRM2	12	29	114	3924	1.18e-11	8.46e-10
TP53	TTK	15	29	173	3924	2e-13	1.51e-11
TP53	PHB1	10	29	114	3924	5.16e-09	2.77e-07
TP53	PTGS2	13	29	176	3924	1.02e-10	5.97e-09
TP53	ARL3	9	29	100	3924	2.86e-08	1.31e-06
TP53	PPP1CC	12	29	93	3924	1.12e-12	8.26e-11
TP53	SREBF1	15	29	173	3924	2e-13	1.51e-11
TP53	BRCA1	13	29	157	3924	2.5e-11	1.56e-09
TP53	HSPA9	13	29	176	3924	1.02e-10	5.97e-09
TP53	CDKN1A	10	29	99	3924	1.35e-09	7.44e-08
TP53	STAT1	11	29	116	3924	3.18e-10	1.84e-08
TP53	STAT6	13	29	113	3924	4.11e-13	3.05e-11
TP53	CDKN2A	9	29	91	3924	1.28e-08	6.45e-07
TP53	CDKN2C	10	29	106	3924	2.59e-09	1.4e-07
TP53	HTT	13	29	157	3924	2.5e-11	1.56e-09
TP53	MAGEA2	13	29	199	3924	4.61e-10	2.6e-08
TP53	MAPK8	10	29	95	3924	9.08e-10	5.06e-08
TP53	MAPK9	8	29	97	3924	3.76e-07	1.6e-05
TP53	CRK	12	29	116	3924	1.45e-11	1.03e-09
TP53	BRCC3	11	29	95	3924	3.87e-11	2.34e-09
TP53	RPS10	9	29	97	3924	2.2e-08	1.08e-06
TP53	MAP1B	15	29	173	3924	2e-13	1.51e-11
TP53	CCT5	13	29	157	3924	2.5e-11	1.56e-09
TP53	UBE2A	9	29	106	3924	4.69e-08	2.1e-06
TP53	RANBP2	15	29	173	3924	2e-13	1.51e-11
TP53	GSK3B	10	29	91	3924	6.02e-10	3.37e-08
TP53	TAF6	10	29	120	3924	8.4e-09	4.33e-07
TP53	SULT1E1	9	29	106	3924	4.69e-08	2.1e-06
TP53	MRE11	12	29	115	3924	1.31e-11	9.34e-10
TP53	SERPINB9	10	29	93	3924	7.41e-10	4.13e-08
TP53	CDK7	13	29	103	3924	1.27e-13	1.08e-11
TP53	BRCA2	13	29	157	3924	2.5e-11	1.56e-09
TP53	UBE2D1	10	29	103	3924	1.97e-09	1.08e-07
TP53	PLK1	13	29	157	3924	2.5e-11	1.56e-09
TP53	BLM	13	29	157	3924	2.5e-11	1.56e-09
TP53	CSE1L	13	29	176	3924	1.02e-10	5.97e-09
TP53	ELL	15	29	173	3924	2e-13	1.51e-11
TP53	CCL18	10	29	111	3924	4.01e-09	2.16e-07
TP53	CDC42	13	29	162	3924	3.68e-11	2.22e-09
TP53	UBE2D3	10	29	109	3924	3.37e-09	1.82e-07
TP53	UBE2K	13	29	101	3924	1.01e-13	8.65e-12
TP53	UBE2N	14	29	107	3924	6.22e-15	9.37e-13
TP53	RAP1B	10	29	92	3924	6.68e-10	3.73e-08
TP53	PPP1CA	9	29	90	3924	1.16e-08	5.9e-07
TP53	YWHAE	9	29	98	3924	2.4e-08	1.15e-06
TP53	TMSB4X	10	29	100	3924	1.48e-09	8.14e-08
TP53	UBE2D2	9	29	105	3924	4.33e-08	1.95e-06
TP53	UBA52	13	29	162	3924	3.68e-11	2.22e-09
TP53	SNRPN	9	29	99	3924	2.62e-08	1.2e-06
TP53	SUMO1	11	29	104	3924	1.01e-10	5.97e-09
TP53	UBE2I	13	29	162	3924	3.68e-11	2.22e-09
TP53	CSNK2B	13	29	162	3924	3.68e-11	2.22e-09
TP53	CSNK2A1	8	29	72	3924	3.91e-08	1.77e-06
TP53	PRKDC	13	29	157	3924	2.5e-11	1.56e-09
TP53	NTHL1	12	29	110	3924	7.83e-12	5.66e-10
TP53	ERH	8	29	98	3924	4.06e-07	1.73e-05
TP53	E2F1	10	29	129	3924	1.66e-08	8.27e-07
TP53	ANK2	15	29	173	3924	2e-13	1.51e-11
TP53	GSTM4	10	29	89	3924	4.86e-10	2.73e-08
TP53	UBE3A	13	29	157	3924	2.5e-11	1.56e-09
TP53	PRKCD	13	29	199	3924	4.61e-10	2.6e-08
TP53	RAD51	9	29	109	3924	5.95e-08	2.66e-06
TP53	BCL2L1	8	29	24	3924	7.5e-12	5.44e-10
TP53	SRSF1	10	29	116	3924	6.09e-09	3.21e-07
TP53	SREBF2	15	29	173	3924	2e-13	1.51e-11
TP53	CHD3	13	29	157	3924	2.5e-11	1.56e-09
TP53	TP53BP1	10	29	53	3924	3.2e-12	2.35e-10
TP53	GPS1	12	29	109	3924	7.05e-12	5.12e-10
TP53	AIMP2	9	29	100	3924	2.86e-08	1.31e-06
TP53	STX5	9	29	93	3924	1.54e-08	7.67e-07
TP53	GPS2	9	29	118	3924	1.17e-07	5.09e-06
TP53	TRIM28	15	29	173	3924	2e-13	1.51e-11
TP53	ATM	13	29	157	3924	2.5e-11	1.56e-09
TP53	PIN1	8	29	95	3924	3.21e-07	1.38e-05
TP53	ATR	13	29	157	3924	2.5e-11	1.56e-09
TP53	HDAC1	8	29	96	3924	3.48e-07	1.49e-05
TP53	TDG	8	29	100	3924	4.73e-07	2e-05
TP53	CUL4A	13	29	176	3924	1.02e-10	5.97e-09
TP53	TP53BP2	8	29	17	3924	4.92e-13	3.64e-11
TP53	COX17	13	29	162	3924	3.68e-11	2.22e-09
TP53	WRN	13	29	157	3924	2.5e-11	1.56e-09
TP53	USP10	15	29	173	3924	2e-13	1.51e-11
TP53	KIAA0087	13	29	157	3924	2.5e-11	1.56e-09
TP53	CUL7	13	29	157	3924	2.5e-11	1.56e-09
TP53	MAD2L1BP	8	29	103	3924	5.9e-07	2.48e-05
TP53	PAFAH1B3	10	29	98	3924	1.22e-09	6.78e-08
TP53	PRKD1	15	29	173	3924	2e-13	1.51e-11
TP53	PPA1	9	29	101	3924	3.11e-08	1.42e-06
TP53	DHCR24	15	29	173	3924	2e-13	1.51e-11
TP53	SAFB	10	29	125	3924	1.23e-08	6.27e-07
TP53	NR0B2	14	29	119	3924	2.84e-14	2.44e-12
TP53	GUSBP1	13	29	162	3924	3.68e-11	2.22e-09
TP53	NCOA2	15	29	173	3924	2e-13	1.51e-11
TP53	MED1	15	29	173	3924	2e-13	1.51e-11
TP53	TWIST1	10	29	122	3924	9.82e-09	5.02e-07
TP53	MAPK11	7	29	101	3924	7.09e-06	0.000264886
TP53	NCOA1	15	29	173	3924	2e-13	1.51e-11
TP53	LAMA4	13	29	157	3924	2.5e-11	1.56e-09
TP53	MAPK14	13	29	104	3924	1.46e-13	1.23e-11
TP53	TAF9	10	29	100	3924	1.48e-09	8.14e-08
TP53	BAK1	12	29	111	3924	8.69e-12	6.27e-10
TP53	SMN1	8	29	91	3924	2.32e-07	1.01e-05
TP53	HIF1A	13	29	157	3924	2.5e-11	1.56e-09
TP53	IFI16	15	29	173	3924	2e-13	1.51e-11
TP53	MAP9	15	29	173	3924	2e-13	1.51e-11
TP53	UFD1L	10	29	115	3924	5.61e-09	2.98e-07
TP53	E4F1	10	29	130	3924	1.79e-08	8.84e-07
TP53	KDM4D	13	29	176	3924	1.02e-10	5.97e-09
TP53	JMJD6	14	29	105	3924	4.22e-15	6.39e-13
TP53	FBXO42	10	29	127	3924	1.43e-08	7.19e-07
TP53	RRM2B	8	29	105	3924	6.82e-07	2.82e-05
TP53	KANSL1	15	29	173	3924	2e-13	1.51e-11
TP53	HUWE1	15	29	173	3924	2e-13	1.51e-11
TP53	CARM1	13	29	176	3924	1.02e-10	5.97e-09
TP53	FBXO11	15	29	173	3924	2e-13	1.51e-11
TP53	VRK2	13	29	176	3924	1.02e-10	5.97e-09
TP53	HIPK1	15	29	173	3924	2e-13	1.51e-11
TP53	MAPKAPK5	9	29	82	3924	5.21e-09	2.79e-07
TP53	CUL9	13	29	157	3924	2.5e-11	1.56e-09
TP53	PIAS4	13	29	162	3924	3.68e-11	2.22e-09
TP53	THAP8	13	29	157	3924	2.5e-11	1.56e-09
TP53	ZMIZ2	10	29	121	3924	9.08e-09	4.67e-07
TP53	COP1	10	29	120	3924	8.4e-09	4.33e-07
TP53	ZCCHC10	13	29	157	3924	2.5e-11	1.56e-09
TP53	CABLES1	15	29	173	3924	2e-13	1.51e-11
TP53	PPP1R13L	7	29	16	3924	2.7e-11	1.68e-09
TP53	FCAMR	13	29	157	3924	2.5e-11	1.56e-09
TP53	ING5	10	29	117	3924	6.61e-09	3.46e-07
TP53	TFAP2C	10	29	123	3924	1.06e-08	5.41e-07
TP53	KAT2B	13	29	157	3924	2.5e-11	1.56e-09
TP53	UFD1	10	29	89	3924	4.86e-10	2.73e-08
TP53	COPS5	12	29	102	3924	3.27e-12	2.39e-10
TP53	SMARCC1	15	29	173	3924	2e-13	1.51e-11
TP53	KAT5	12	29	102	3924	3.27e-12	2.39e-10
TP53	EAF2	10	29	118	3924	7.16e-09	3.73e-07
TP53	SIRT1	13	29	157	3924	2.5e-11	1.56e-09
TP53	TOE1	10	29	115	3924	5.61e-09	2.98e-07
TP53	PBK	10	29	105	3924	2.36e-09	1.28e-07
TP53	EHMT2	15	29	173	3924	2e-13	1.51e-11
TP53	MAGEB18	13	29	162	3924	3.68e-11	2.22e-09
TP53	RCHY1	10	29	99	3924	1.35e-09	7.44e-08
TP53	UHRF2	15	29	173	3924	2e-13	1.51e-11
TP53	MPHOSPH6	8	29	94	3924	2.97e-07	1.27e-05
TP53	NDN	10	29	122	3924	9.82e-09	5.02e-07
TP53	BAG1	10	29	120	3924	8.4e-09	4.33e-07
TP53	VRK1	8	29	87	3924	1.65e-07	7.17e-06
TP53	HINFP	13	29	157	3924	2.5e-11	1.56e-09
TP53	ANTKMT	9	29	93	3924	1.54e-08	7.67e-07
TP53	DUSP26	8	29	103	3924	5.9e-07	2.48e-05
TP53	CCDC106	13	29	157	3924	2.5e-11	1.56e-09
TP53	BTBD2	13	29	157	3924	2.5e-11	1.56e-09
TP53	HDAC8	11	29	107	3924	1.36e-10	7.89e-09
TP53	WDR33	13	29	157	3924	2.5e-11	1.56e-09
TP53	FXYD6	10	29	107	3924	2.83e-09	1.53e-07
TP53	HIPK2	13	29	157	3924	2.5e-11	1.56e-09
TP53	HIPK3	15	29	173	3924	2e-13	1.51e-11
TP53	PLK3	13	29	157	3924	2.5e-11	1.56e-09
TP53	EHMT1	13	29	157	3924	2.5e-11	1.56e-09
TP53	USP42	15	29	173	3924	2e-13	1.51e-11
TP53	BRD7	10	29	117	3924	6.61e-09	3.46e-07
TP53	KMT5A	10	29	116	3924	6.09e-09	3.21e-07
TP53	TOPORS	13	29	157	3924	2.5e-11	1.56e-09
TP53	BABAM2	9	29	121	3924	1.44e-07	6.27e-06
TP53	WWOX	10	29	122	3924	9.82e-09	5.02e-07
TP53	CXXC1	15	29	173	3924	2e-13	1.51e-11
TP53	MAGEC2	13	29	176	3924	1.02e-10	5.97e-09
TP53	DAXX	13	29	157	3924	2.5e-11	1.56e-09
TP53	ING1	10	29	120	3924	8.4e-09	4.33e-07
TP53	APPL1	11	29	90	3924	2.18e-11	1.53e-09
TP53	ZHX1	13	29	157	3924	2.5e-11	1.56e-09
TP53	ZMIZ1	15	29	173	3924	2e-13	1.51e-11
TP53	PCDHA4	13	29	157	3924	2.5e-11	1.56e-09
TP53	STUB1	10	29	104	3924	2.16e-09	1.17e-07
TP53	CDC14A	13	29	199	3924	4.61e-10	2.6e-08
TP53	ING4	10	29	114	3924	5.16e-09	2.77e-07
TP53	UBE2J1	10	29	116	3924	6.09e-09	3.21e-07
TP53	L3MBTL1	10	29	127	3924	1.43e-08	7.19e-07
TP53	NCOR2	15	29	173	3924	2e-13	1.51e-11
TP53	SNURF	13	29	157	3924	2.5e-11	1.56e-09
MPO	MPO	5	8	237	3622	5.68e-05	0.00167774
NEFM	FOS	2	5	30	4377	0.000463368	0.00726183
NEFM	JUN	2	5	30	4377	0.000463368	0.00726183
NEFM	RB1	2	5	30	4377	0.000463368	0.00726183
NEFM	NR4A2	2	5	30	4377	0.000463368	0.00726183
NEFM	MDM2	2	5	30	4377	0.000463368	0.00726183
NEFM	SMAD2	2	5	30	4377	0.000463368	0.00726183
NEFM	MINK1	2	5	30	4377	0.000463368	0.00726183
NEFM	TNIK	2	5	30	4377	0.000463368	0.00726183
KLK3	SEMG1	2	3	36	4639	0.000179732	0.00417406
CAPN1	ACTC1	2	3	98	7553	0.000500681	0.00771361
CAPN1	BCL2A1	2	3	113	7553	0.000664792	0.00929934
PFKM	AURKA	2	2	196	7284	0.000724056	0.00980679
PFKM	PFKM	2	2	196	7284	0.000724056	0.00980679
PFKM	MAPK3	2	2	196	7284	0.000724056	0.00980679
PFKM	SARS1	2	2	196	7284	0.000724056	0.00980679
PFKM	SUMO3	2	2	196	7284	0.000724056	0.00980679
PFKM	PFKP	2	2	196	7284	0.000724056	0.00980679
PFKM	TUBB2A	2	2	196	7284	0.000724056	0.00980679
PFKM	PSMD5	2	2	196	7284	0.000724056	0.00980679
PFKM	SIAH1	2	2	196	7284	0.000724056	0.00980679
PFKM	MCFD2	2	2	196	7284	0.000724056	0.00980679
PFKM	XPO6	2	2	196	7284	0.000724056	0.00980679
PFKM	UBTD1	2	2	196	7284	0.000724056	0.00980679
PFKM	HEL-S-47e	2	2	196	7284	0.000724056	0.00980679
FCGR3A	IGHG1	2	3	29	2977	0.000282833	0.00582081
PSKH1	RDH13	2	2	87	3977	0.00047855	0.00748685
FABP2	TERF2IP	2	2	48	2478	0.000375215	0.00700324
LCP1	FN1	2	2	121	5216	0.00053814	0.00795369
LCP1	EZR	2	2	59	5216	0.000127947	0.00328529
LCP1	GCA	2	2	73	5216	0.000195871	0.0044659
LCP1	RDX	2	2	66	5216	0.000160108	0.00394042
LCP1	RAD23B	2	2	76	5216	0.000212301	0.00466552
LCP1	AIF1	2	2	72	5216	0.000190542	0.00435896
LCP1	CNN3	2	2	121	5216	0.00053814	0.00795369
LCP1	CNDP2	2	2	66	5216	0.000160108	0.00394042
LCP1	ATXN2	2	2	121	5216	0.00053814	0.00795369
LCP1	FKBP14	2	2	78	5216	0.000223622	0.00484733
LCP1	HEL70	2	2	60	5216	0.000132321	0.00337535
MYOG	BTG1	3	4	53	1528	0.000162581	0.00399048
MYOG	CLUAP1	3	4	53	1528	0.000162581	0.00399048
VAV1	SOCS1	4	7	114	4269	1.67e-05	0.000600169
VAV1	MET	4	7	243	4269	0.000319587	0.0064602
VEGFA	VEGFA	2	3	75	14431	8.08e-05	0.00232031
UBA1	EPM2A	2	2	177	6437	0.0007561	0.00980679
UBA1	HIP1	2	2	177	6437	0.0007561	0.00980679
UBA1	RIOK3	2	2	177	6437	0.0007561	0.00980679
UBA1	HGS	2	2	177	6437	0.0007561	0.00980679
UBA1	MDM4	2	2	177	6437	0.0007561	0.00980679
UBA1	RNF13	2	2	177	6437	0.0007561	0.00980679
UBA1	HIP1R	2	2	177	6437	0.0007561	0.00980679
UBA1	DNAJB6	2	2	177	6437	0.0007561	0.00980679
UBA1	KRT36	2	2	177	6437	0.0007561	0.00980679
UBA1	AHSA1	2	2	177	6437	0.0007561	0.00980679
UBA1	PABPC1	2	2	177	6437	0.0007561	0.00980679
UBA1	EPHA1	2	2	177	6437	0.0007561	0.00980679
UBA1	TRIM23	2	2	177	6437	0.0007561	0.00980679
UBA1	CDKN1B	2	2	177	6437	0.0007561	0.00980679
UBA1	RNF4	2	2	177	6437	0.0007561	0.00980679
UBA1	ARHGAP1	2	2	177	6437	0.0007561	0.00980679
UBA1	NSUN2	2	2	177	6437	0.0007561	0.00980679
UBA1	CBLB	2	2	177	6437	0.0007561	0.00980679
UBA1	DUSP7	2	2	177	6437	0.0007561	0.00980679
UBA1	GRIPAP1	2	2	177	6437	0.0007561	0.00980679
UBA1	RNF20	2	2	177	6437	0.0007561	0.00980679
UBA1	INTS3	2	2	177	6437	0.0007561	0.00980679
UBA1	CEP85	2	2	177	6437	0.0007561	0.00980679
UBA1	RFWD3	2	2	177	6437	0.0007561	0.00980679
UBA1	LRSAM1	2	2	177	6437	0.0007561	0.00980679
UBA1	NHLRC1	2	2	177	6437	0.0007561	0.00980679
UBA1	RNF111	2	2	177	6437	0.0007561	0.00980679
UBA1	MFSD6	2	2	177	6437	0.0007561	0.00980679
UBA1	ANKRD13D	2	2	177	6437	0.0007561	0.00980679
UBA1	SLC9B2	2	2	177	6437	0.0007561	0.00980679
UBA1	RNF135	2	2	177	6437	0.0007561	0.00980679
UBA1	HACE1	2	2	177	6437	0.0007561	0.00980679
UBA1	ANKRD13A	2	2	177	6437	0.0007561	0.00980679
UBA1	RNF182	2	2	177	6437	0.0007561	0.00980679
UBA1	FAM184A	2	2	177	6437	0.0007561	0.00980679
UBA1	DENND6B	2	2	177	6437	0.0007561	0.00980679
UBA1	DBF4B	2	2	177	6437	0.0007561	0.00980679
UBA1	NPLOC4	2	2	177	6437	0.0007561	0.00980679
UBA1	RHBDD1	2	2	177	6437	0.0007561	0.00980679
UBA1	UBE2Q2	2	2	177	6437	0.0007561	0.00980679
UBA1	BAP1	2	2	177	6437	0.0007561	0.00980679
UBA1	RNF34	2	2	177	6437	0.0007561	0.00980679
UBA1	TRIM52	2	2	177	6437	0.0007561	0.00980679
UBA1	FAF2	2	2	177	6437	0.0007561	0.00980679
UBA1	NMD3	2	2	177	6437	0.0007561	0.00980679
UBA1	TRIM11	2	2	177	6437	0.0007561	0.00980679
UBA1	TSPAN17	2	2	177	6437	0.0007561	0.00980679
UBA1	CRELD1	2	2	177	6437	0.0007561	0.00980679
UBA1	CARD14	2	2	177	6437	0.0007561	0.00980679
UBA1	RBCK1	2	2	177	6437	0.0007561	0.00980679
UBA1	ASCC2	2	2	177	6437	0.0007561	0.00980679
UBA1	GAN	2	2	177	6437	0.0007561	0.00980679
UBA1	MINDY3	2	2	177	6437	0.0007561	0.00980679
UBA1	RIC8A	2	2	177	6437	0.0007561	0.00980679
UBA1	TXLNG	2	2	177	6437	0.0007561	0.00980679
UBA1	CUEDC1	2	2	177	6437	0.0007561	0.00980679
UBA1	IMPACT	2	2	177	6437	0.0007561	0.00980679
UBA1	APEX2	2	2	177	6437	0.0007561	0.00980679
UBA1	GGA2	2	2	177	6437	0.0007561	0.00980679
UBA1	STUB1	2	2	177	6437	0.0007561	0.00980679
UBA1	TLN1	2	2	177	6437	0.0007561	0.00980679
UBA1	EPN1	2	2	177	6437	0.0007561	0.00980679
UBA1	USH1C	2	2	177	6437	0.0007561	0.00980679
FBLN1	CACNA1A	2	3	55	7136	0.000177296	0.00413222
FBLN1	BHLHE40	2	3	55	7136	0.000177296	0.00413222
FBLN1	FN1	2	3	55	7136	0.000177296	0.00413222
FBLN1	APP	2	3	55	7136	0.000177296	0.00413222
FBLN1	SKIL	2	3	55	7136	0.000177296	0.00413222
FBLN1	TDGF1	2	3	55	7136	0.000177296	0.00413222
FBLN1	YWHAQ	2	3	55	7136	0.000177296	0.00413222
FBLN1	ATN1	2	3	55	7136	0.000177296	0.00413222
FBLN1	SMAD3	2	3	55	7136	0.000177296	0.00413222
FBLN1	SMAD4	2	3	55	7136	0.000177296	0.00413222
FBLN1	ECM1	2	3	55	7136	0.000177296	0.00413222
FBLN1	GFI1B	2	3	55	7136	0.000177296	0.00413222
FBLN1	EDC4	2	3	55	7136	0.000177296	0.00413222
FBLN1	ADAMTSL4	2	3	55	7136	0.000177296	0.00413222
FBLN1	ADAMTSL2	2	3	55	7136	0.000177296	0.00413222
FBLN1	FAM20C	2	3	55	7136	0.000177296	0.00413222
FBLN1	NEDD1	2	3	55	7136	0.000177296	0.00413222
FBLN1	TFAP2C	2	3	55	7136	0.000177296	0.00413222
FBLN1	TANK	2	3	55	7136	0.000177296	0.00413222
FBLN1	TCF7L2	2	3	55	7136	0.000177296	0.00413222
PTPRZ1	PTPRZ1	2	14	26	9917	0.000612522	0.00887977
MMP11	PRPF40A	4	4	152	5176	7.44e-07	3.07e-05
CHM	RAB3A	3	4	129	8644	1.31e-05	0.000477338
CHM	RAB3B	3	4	142	8644	1.75e-05	0.000621069
CHM	RAB5B	3	4	140	8644	1.68e-05	0.000603142
CHM	RAB1A	3	4	145	8644	1.86e-05	0.00065938
CHM	RAB32	3	4	121	8644	1.09e-05	0.000399521
CHM	ESR2	2	4	95	8644	0.000714142	0.00979082
CHM	RAB1B	3	4	159	8644	2.46e-05	0.000846383
NPY1R	NPY	2	3	46	4180	0.00036065	0.00681065
NPY1R	PYY	2	3	46	4180	0.00036065	0.00681065
NPY1R	LSM7	2	3	66	4180	0.00074005	0.00980679
ITGB7	ITGAE	3	5	182	4481	0.000629865	0.0090763
CAD	PSMD12	4	6	305	8422	2.43e-05	0.000839753
CAD	DDX3X	6	6	455	8422	2.49e-08	1.15e-06
CAD	XPO1	6	6	455	8422	2.49e-08	1.15e-06
CAD	DNAJA2	4	6	305	8422	2.43e-05	0.000839753
CAD	UBR5	4	6	305	8422	2.43e-05	0.000839753
CAD	ATP1A1	6	6	455	8422	2.49e-08	1.15e-06
CAD	EIF2S1	6	6	455	8422	2.49e-08	1.15e-06
CAD	PC	6	6	455	8422	2.49e-08	1.15e-06
CAD	PSMC3	6	6	455	8422	2.49e-08	1.15e-06
CAD	VCAM1	4	6	305	8422	2.43e-05	0.000839753
CAD	UQCRC2	6	6	455	8422	2.49e-08	1.15e-06
CAD	RPS3	4	6	305	8422	2.43e-05	0.000839753
CAD	VARS1	6	6	455	8422	2.49e-08	1.15e-06
CAD	DNAJA1	4	6	305	8422	2.43e-05	0.000839753
CAD	MCM7	6	6	455	8422	2.49e-08	1.15e-06
CAD	PSMC2	6	6	455	8422	2.49e-08	1.15e-06
CAD	CCT6A	6	6	455	8422	2.49e-08	1.15e-06
CAD	IARS1	6	6	455	8422	2.49e-08	1.15e-06
CAD	PSMC4	6	6	455	8422	2.49e-08	1.15e-06
CAD	SARS1	6	6	455	8422	2.49e-08	1.15e-06
CAD	IDH3A	6	6	455	8422	2.49e-08	1.15e-06
CAD	CCT8	6	6	455	8422	2.49e-08	1.15e-06
CAD	CCT4	6	6	455	8422	2.49e-08	1.15e-06
CAD	SMARCA4	4	6	305	8422	2.43e-05	0.000839753
CAD	COPB1	4	6	305	8422	2.43e-05	0.000839753
CAD	PSMD4	6	6	455	8422	2.49e-08	1.15e-06
CAD	ACTR1A	6	6	455	8422	2.49e-08	1.15e-06
CAD	PSMC5	6	6	455	8422	2.49e-08	1.15e-06
CAD	PSMC6	6	6	455	8422	2.49e-08	1.15e-06
CAD	ACTG1	6	6	455	8422	2.49e-08	1.15e-06
CAD	EEF1A1	6	6	455	8422	2.49e-08	1.15e-06
CAD	TUBA4A	6	6	455	8422	2.49e-08	1.15e-06
CAD	TUBB4B	6	6	455	8422	2.49e-08	1.15e-06
CAD	CLTC	4	6	305	8422	2.43e-05	0.000839753
CAD	GFPT1	6	6	455	8422	2.49e-08	1.15e-06
CAD	PSMD2	4	6	305	8422	2.43e-05	0.000839753
CAD	TUBB2A	6	6	455	8422	2.49e-08	1.15e-06
CAD	EIF2B1	6	6	455	8422	2.49e-08	1.15e-06
CAD	PS1TP5BP1	6	6	455	8422	2.49e-08	1.15e-06
CAD	DKFZp686J11229	4	6	305	8422	2.43e-05	0.000839753
CAD	SMARCC2	4	6	305	8422	2.43e-05	0.000839753
CAD	IPO4	6	6	455	8422	2.49e-08	1.15e-06
CAD	DNAJA4	4	6	305	8422	2.43e-05	0.000839753
CAD	DNAJA3	4	6	305	8422	2.43e-05	0.000839753
CAD	YME1L1	6	6	455	8422	2.49e-08	1.15e-06
CAD	PSMD1	6	6	455	8422	2.49e-08	1.15e-06
CAD	ACSS2	6	6	455	8422	2.49e-08	1.15e-06
CAD	RUVBL2	6	6	455	8422	2.49e-08	1.15e-06
CAD	RUVBL1	6	6	455	8422	2.49e-08	1.15e-06
CAD	HEL-S-72p	6	6	455	8422	2.49e-08	1.15e-06
NDUFS1	NDUFS8	2	4	99	12268	0.000386536	0.00706264
NDUFS1	NDUFS4	2	4	98	12268	0.000378808	0.00706064
NDUFS1	NDUFA2	3	4	130	12268	4.72e-06	0.000183415
NDUFS1	OPA1	3	4	176	12268	1.17e-05	0.000424802
NDUFS1	KDM1A	3	4	232	12268	2.67e-05	0.000897807
NDUFS1	ECE2	3	4	232	12268	2.67e-05	0.000897807
NDUFS1	NDUFS2	3	4	232	12268	2.67e-05	0.000897807
NDUFS1	NDUFB10	3	4	176	12268	1.17e-05	0.000424802
NDUFS1	TOMM40	3	4	95	12268	1.85e-06	7.49e-05
NDUFS1	ATP1A1	3	4	232	12268	2.67e-05	0.000897807
NDUFS1	ATP1B1	3	4	232	12268	2.67e-05	0.000897807
NDUFS1	C1QTNF9	3	4	176	12268	1.17e-05	0.000424802
NDUFS1	UQCRB	3	4	127	12268	4.4e-06	0.000172762
NDUFS1	VCAM1	3	4	176	12268	1.17e-05	0.000424802
NDUFS1	NDUFV2	3	4	128	12268	4.51e-06	0.000176611
NDUFS1	SDHB	3	4	130	12268	4.72e-06	0.000183415
NDUFS1	UQCRC2	3	4	93	12268	1.73e-06	7.05e-05
NDUFS1	CASP3	3	4	106	12268	2.56e-06	0.000102947
NDUFS1	NDUFV1	3	4	232	12268	2.67e-05	0.000897807
NDUFS1	CPT1A	3	4	232	12268	2.67e-05	0.000897807
NDUFS1	SEC24C	3	4	232	12268	2.67e-05	0.000897807
NDUFS1	ATP1B3	3	4	129	12268	4.61e-06	0.000180062
NDUFS1	NDUFV3	3	4	176	12268	1.17e-05	0.000424802
NDUFS1	RAB5B	3	4	122	12268	3.9e-06	0.000153862
NDUFS1	RPL27	3	4	116	12268	3.36e-06	0.000133271
NDUFS1	ATP6V0D1	2	4	122	12268	0.000585529	0.00854295
NDUFS1	RPS15	2	4	120	12268	0.000566612	0.00830696
NDUFS1	GNB2	3	4	131	12268	4.83e-06	0.000187213
NDUFS1	CLTC	3	4	176	12268	1.17e-05	0.000424802
NDUFS1	NDUFA9	2	4	91	12268	0.000326875	0.00649676
NDUFS1	DKFZp686J11229	3	4	176	12268	1.17e-05	0.000424802
NDUFS1	STX12	3	4	123	12268	4e-06	0.000157212
NDUFS1	CPNE8	3	4	176	12268	1.17e-05	0.000424802
NDUFS1	RHOT2	3	4	117	12268	3.44e-06	0.00013654
NDUFS1	MRPL13	3	4	123	12268	4e-06	0.000157212
NDUFS1	TECR	2	4	94	12268	0.000348668	0.00671421
NDUFS1	MTCH1	2	4	91	12268	0.000326875	0.00649676
NDUFS1	VAPA	3	4	232	12268	2.67e-05	0.000897807
NDUFS1	AFG3L2	3	4	232	12268	2.67e-05	0.000897807
NDUFS1	MTCH2	3	4	116	12268	3.36e-06	0.000133271
NDUFS1	COX2	3	4	232	12268	2.67e-05	0.000897807
NDUFS1	ND1	3	4	232	12268	2.67e-05	0.000897807
NDUFS1	HEL-S-271	3	4	232	12268	2.67e-05	0.000897807
CD38	LCK	2	2	31	6855	2.05e-05	0.000720505
CD38	CD3E	2	2	31	6855	2.05e-05	0.000720505
CD38	CD247	2	2	20	6855	8.51e-06	0.000317539
NOS1	NOS1	3	9	81	13144	1.91e-05	0.00067537
LRPAP1	PPM1G	2	2	208	8724	0.000568454	0.00831608
LRPAP1	RAF1	2	2	208	8724	0.000568454	0.00831608
LRPAP1	VCL	2	2	244	8724	0.000782255	0.00999637
LRPAP1	RANBP2	2	2	208	8724	0.000568454	0.00831608
LRPAP1	RTN4	2	2	208	8724	0.000568454	0.00831608
POLR2B	POLR3A	3	3	415	5901	0.00034783	0.00670317
POLR2B	TUBB	3	3	415	5901	0.00034783	0.00670317
POLR2B	POLR2C	3	3	415	5901	0.00034783	0.00670317
POLR2B	POLR2E	3	3	415	5901	0.00034783	0.00670317
POLR2B	ATP6V1B2	3	3	415	5901	0.00034783	0.00670317
POLR2B	POLR2A	3	3	415	5901	0.00034783	0.00670317
POLR2B	POLR2I	3	3	415	5901	0.00034783	0.00670317
POLR2B	RPS5	3	3	415	5901	0.00034783	0.00670317
POLR2B	CDK7	3	3	415	5901	0.00034783	0.00670317
POLR2B	CCNH	3	3	415	5901	0.00034783	0.00670317
POLR2B	POLR2H	3	3	415	5901	0.00034783	0.00670317
POLR2B	POLR2J	3	3	415	5901	0.00034783	0.00670317
POLR2B	PPP5C	3	3	415	5901	0.00034783	0.00670317
POLR2B	POLR2F	3	3	415	5901	0.00034783	0.00670317
POLR2B	EEF1A1	3	3	415	5901	0.00034783	0.00670317
POLR2B	TUBA4A	3	3	415	5901	0.00034783	0.00670317
POLR2B	TUBB4B	3	3	415	5901	0.00034783	0.00670317
POLR2B	POLR1B	3	3	415	5901	0.00034783	0.00670317
CASP14	FLG	2	3	51	3499	0.000631151	0.0090763
YWHAB	TUBB	2	2	67	4017	0.000278193	0.00573397
YWHAB	BID	2	2	74	4017	0.000339359	0.00663844
YWHAB	TUBA1A	2	2	67	4017	0.000278193	0.00573397
SLC8A1	PPP3CB	2	5	125	21944	0.000320799	0.00647512
SLC8A1	IQCJ-SCHIP1	2	5	125	21944	0.000320799	0.00647512
SSTR3	MPDZ	3	3	184	4520	6.75e-05	0.00195279
SSTR3	LNX1	3	3	80	4520	5.54e-06	0.000208251
CTNNB1	HLA-A	3	4	10	6606	1.39e-08	6.99e-07
CTNNB1	BTRC	2	4	9	6606	1.11e-05	0.000408541
NF2	TARBP2	2	3	94	7170	0.000511124	0.00774175
AGL	MAN2B1	2	4	56	8434	0.000262185	0.00544518
AGL	CAT	2	4	56	8434	0.000262185	0.00544518
AGL	SERPINE2	2	4	56	8434	0.000262185	0.00544518
AGL	SDHB	2	4	56	8434	0.000262185	0.00544518
AGL	PSMB6	2	4	56	8434	0.000262185	0.00544518
AGL	ADSS2	2	4	56	8434	0.000262185	0.00544518
AGL	GCK	2	4	56	8434	0.000262185	0.00544518
AGL	GARS1	2	4	56	8434	0.000262185	0.00544518
AGL	USP5	2	4	56	8434	0.000262185	0.00544518
AGL	GCLC	2	4	56	8434	0.000262185	0.00544518
AGL	SULT1E1	2	4	56	8434	0.000262185	0.00544518
AGL	KHK	2	4	56	8434	0.000262185	0.00544518
AGL	BCAT1	2	4	56	8434	0.000262185	0.00544518
AGL	RAN	2	4	56	8434	0.000262185	0.00544518
AGL	FKBP1A	2	4	56	8434	0.000262185	0.00544518
AGL	FKBP1B	2	4	56	8434	0.000262185	0.00544518
AGL	GLO1	2	4	56	8434	0.000262185	0.00544518
AGL	TKFC	2	4	56	8434	0.000262185	0.00544518
AGL	FLJ00340	2	4	56	8434	0.000262185	0.00544518
AGL	TOM1L2	2	4	56	8434	0.000262185	0.00544518
AGL	NAXD	2	4	56	8434	0.000262185	0.00544518
AGL	MCFD2	2	4	56	8434	0.000262185	0.00544518
AGL	SPATA20	2	4	56	8434	0.000262185	0.00544518
AGL	VPS25	2	4	56	8434	0.000262185	0.00544518
AGL	ASPSCR1	2	4	56	8434	0.000262185	0.00544518
AGL	GRHPR	2	4	56	8434	0.000262185	0.00544518
AGL	APPL1	2	4	56	8434	0.000262185	0.00544518
AGL	DERA	2	4	56	8434	0.000262185	0.00544518
AGL	YTHDF2	2	4	56	8434	0.000262185	0.00544518
AGL	PUS1	2	4	56	8434	0.000262185	0.00544518
AGL	HEL-S-30	2	4	56	8434	0.000262185	0.00544518
ITGAE	EED	2	6	43	6657	0.000615149	0.00889894
ITGAE	CDH1	2	6	43	6657	0.000615149	0.00889894
ITGAE	ITGB7	2	6	43	6657	0.000615149	0.00889894
ITGAE	CHFR	2	6	43	6657	0.000615149	0.00889894
IGHMBP2	IGHMBP2	2	5	55	6465	0.000711514	0.00977444
OPRD1	ADRB2	3	3	99	1774	0.000173798	0.00413222
OPRD1	GNAO1	3	3	96	1774	0.000158472	0.00391429
OPRD1	CANX	3	3	94	1774	0.000148773	0.00372532
OPRD1	HSPA4	3	3	104	1774	0.000201483	0.00456471
OPRD1	GPRASP1	3	3	158	1774	0.000706497	0.0097448
GRIA2	SDCBP	2	2	204	8941	0.000520581	0.00774175
GRIA2	NSF	2	2	133	8941	0.000221274	0.00482714
GRIA2	SPTBN1	2	2	133	8941	0.000221274	0.00482714
GRIA2	SPTAN1	2	2	133	8941	0.000221274	0.00482714
GRIA2	GTF3C2	2	2	133	8941	0.000221274	0.00482714
GRIA2	GRIP2	2	2	133	8941	0.000221274	0.00482714
GRIA2	PICK1	2	2	133	8941	0.000221274	0.00482714
GRIA2	GRIP1	2	2	133	8941	0.000221274	0.00482714
PIK3CA	FBP2	3	6	243	9411	0.000324711	0.00647811
PIK3CA	ADAP1	3	6	243	9411	0.000324711	0.00647811
PIK3CA	NRAS	3	6	240	9411	0.000313061	0.00633297
PIK3CA	HRAS	3	6	240	9411	0.000313061	0.00633297
PIK3CA	KRAS	3	6	243	9411	0.000324711	0.00647811
PIK3CA	FTL	3	6	240	9411	0.000313061	0.00633297
PIK3CA	UMPS	3	6	243	9411	0.000324711	0.00647811
PIK3CA	DDX5	3	6	240	9411	0.000313061	0.00633297
PIK3CA	TMOD1	3	6	246	9411	0.000336641	0.00659472
PIK3CA	STAT1	3	6	243	9411	0.000324711	0.00647811
PIK3CA	RPS20	3	6	240	9411	0.000313061	0.00633297
PIK3CA	MAP2K1	3	6	243	9411	0.000324711	0.00647811
PIK3CA	IL24	2	6	64	9411	0.000681228	0.00944403
PIK3CA	IL13RA2	3	6	243	9411	0.000324711	0.00647811
PIK3CA	VARS2	3	6	240	9411	0.000313061	0.00633297
PIK3CA	RASGRP3	3	6	246	9411	0.000336641	0.00659472
PIK3CA	GALNT12	3	6	246	9411	0.000336641	0.00659472
PIK3CA	THRSP	3	6	243	9411	0.000324711	0.00647811
PIK3CA	UFD1	3	6	240	9411	0.000313061	0.00633297
PIK3CA	BEX1	3	6	243	9411	0.000324711	0.00647811
PIK3CA	ATP5IF1	3	6	240	9411	0.000313061	0.00633297
PIK3CA	APPL1	3	6	243	9411	0.000324711	0.00647811
MCAM	ADRB2	2	2	30	7420	1.63e-05	0.000588855
MCAM	HSPA1L	2	2	30	7420	1.63e-05	0.000588855
MCAM	ATF7IP	2	2	30	7420	1.63e-05	0.000588855
MCAM	UBE2O	2	2	30	7420	1.63e-05	0.000588855
TNNT2	KDM1A	2	2	186	7281	0.000652595	0.00925409
TNNT2	PRKCA	2	2	131	7281	0.000323713	0.00647811
TNNT2	TNNI1	2	2	136	7281	0.000348896	0.00671421
TNNT2	TNNI3	2	2	117	7281	0.00025822	0.00544518
TNNT2	TNNC1	2	2	113	7281	0.000240866	0.00516365
GRIA4	SDCBP	3	5	275	10083	0.000194666	0.00444585
GRIA4	PRKACA	3	5	402	10083	0.000596441	0.00868359
GRIA4	CAMK2A	3	5	258	10083	0.000161165	0.00396285
PIP4K2A	LOC51064	2	3	72	5088	0.00059508	0.0086684
PIP4K2A	PRPF8	3	3	161	5088	3.17e-05	0.00101885
CSNK1D	PPM1B	2	2	84	11024	5.81e-05	0.00170425
CSNK1D	SNAPIN	2	2	75	11024	4.63e-05	0.00140895
CSNK1D	CTNNB1	2	2	142	11024	0.00016592	0.00404693
CSNK1D	TGFBR1	2	2	142	11024	0.00016592	0.00404693
CSNK1D	SNCA	2	2	115	11024	0.000108822	0.00285429
CSNK1D	BYSL	2	2	71	11024	4.15e-05	0.00129567
CSNK1D	SMURF1	2	2	83	11024	5.67e-05	0.00167655
MASP1	C3	3	10	137	12292	0.000156675	0.00388045
MASP1	C2	3	10	137	12292	0.000156675	0.00388045
MASP1	GSK3B	3	10	137	12292	0.000156675	0.00388045
FASN	SHTN1	3	5	323	8979	0.000440747	0.00706264
FASN	PIK3C2B	3	5	323	8979	0.000440747	0.00706264
FASN	AHSA1	3	5	323	8979	0.000440747	0.00706264
FASN	TPM3	3	5	323	8979	0.000440747	0.00706264
FASN	VCAM1	3	5	323	8979	0.000440747	0.00706264
FASN	ABCC1	3	5	323	8979	0.000440747	0.00706264
FASN	EMD	3	5	323	8979	0.000440747	0.00706264
FASN	CAP1	3	5	323	8979	0.000440747	0.00706264
FASN	TARBP1	3	5	323	8979	0.000440747	0.00706264
FASN	SIRT1	3	5	323	8979	0.000440747	0.00706264
FASN	MTCH1	3	5	323	8979	0.000440747	0.00706264
FASN	HEL-S-108	3	5	323	8979	0.000440747	0.00706264
DNM2	RAB7A	2	3	205	13443	0.000690556	0.00955877
DNM2	SH3GL1	2	3	202	13443	0.000670593	0.00933933
BCAM	LAMA5	3	3	62	5008	1.9e-06	7.67e-05
BCAM	KLHL2	3	3	62	5008	1.9e-06	7.67e-05
BCAM	UBE2I	3	3	62	5008	1.9e-06	7.67e-05
ANXA11	FH	2	2	169	8770	0.000371342	0.00694522
ANXA11	ENO2	2	2	166	8770	0.000358275	0.00680757
ANXA11	MIF	2	2	96	8770	0.000119824	0.00310302
ANXA11	HNRNPH3	2	2	121	8770	0.000190358	0.00435842
ANXA11	EWSR1	2	2	121	8770	0.000190358	0.00435842
ANXA11	ZDHHC17	2	2	121	8770	0.000190358	0.00435842
ANXA11	ALG2	2	2	166	8770	0.000358275	0.00680757
FXR1	VCL	2	2	193	12054	0.000256361	0.00544518
FXR1	GBP2	2	2	159	12054	0.000173993	0.00413222
FXR1	CRMP1	2	2	159	12054	0.000173993	0.00413222
FXR1	LRIF1	2	2	159	12054	0.000173993	0.00413222
FXR1	RIF1	2	2	159	12054	0.000173993	0.00413222
FXR1	GBP7	2	2	159	12054	0.000173993	0.00413222
FXR1	CYFIP2	2	2	193	12054	0.000256361	0.00544518
FXR1	CEP126	2	2	159	12054	0.000173993	0.00413222
FXR1	AGO2	2	2	193	12054	0.000256361	0.00544518
FXR1	LUC7L2	2	2	159	12054	0.000173993	0.00413222
GZMM	DFFA	2	3	7	940	0.000165539	0.00404488
GZMM	NPM1	2	3	7	940	0.000165539	0.00404488
INSL3	RXFP2	2	2	23	923	0.000620944	0.008978
CLCN5	CREB3	3	4	79	10619	1.64e-06	6.68e-05
CLCN5	CLCN5	3	4	79	10619	1.64e-06	6.68e-05
MAP2K6	MAP2K6	2	3	92	6125	0.00067006	0.00933668
GEM	NDUFS8	2	3	34	2648	0.000490354	0.00759311
GEM	VTN	2	3	36	2648	0.00054946	0.00809904
GEM	TRIM27	2	3	29	2648	0.00035719	0.00680757
GEM	TRIM23	2	3	33	2648	0.000462051	0.00726183
GEM	CLDN15	2	3	35	2648	0.00051949	0.00774175
GEM	TRAF1	2	3	29	2648	0.00035719	0.00680757
GEM	RUNDC3A	2	3	28	2648	0.000333065	0.00655292
GEM	CCDC102B	2	3	34	2648	0.000490354	0.00759311
GEM	KLC3	2	3	36	2648	0.00054946	0.00809904
GEM	CLEC4G	2	3	36	2648	0.00054946	0.00809904
GEM	KCTD9	2	3	32	2648	0.000434582	0.00706264
GEM	NOTCH2NLA	2	3	32	2648	0.000434582	0.00706264
GEM	COG8	2	3	33	2648	0.000462051	0.00726183
GEM	LZTS2	2	3	29	2648	0.00035719	0.00680757
GEM	TRIM54	2	3	35	2648	0.00051949	0.00774175
GEM	BLZF1	2	3	29	2648	0.00035719	0.00680757
GEM	PDLIM7	2	3	36	2648	0.00054946	0.00809904
GEM	IKZF3	2	3	37	2648	0.000580262	0.00847518
GEM	DKFZp564J0123	2	3	32	2648	0.000434582	0.00706264
CASP7	BIRC5	2	2	82	3466	0.00055972	0.00821475
CASP7	CTSG	2	2	76	3466	0.000480806	0.00749907
CASP7	GZMB	2	2	76	3466	0.000480806	0.00749907
CASP7	CTSA	2	2	68	3466	0.000384911	0.00706264
CASP7	PEPD	2	2	76	3466	0.000480806	0.00749907
CASP7	EEF2	2	2	68	3466	0.000384911	0.00706264
CASP7	GBP2	2	2	74	3466	0.000455834	0.00722682
CASP7	STAT1	2	2	63	3466	0.000330388	0.00653799
CASP7	CASP3	2	2	60	3466	0.000299671	0.00615806
CASP7	PLA2G4A	2	2	63	3466	0.000330388	0.00653799
CASP7	PSEN1	2	2	71	3466	0.000419623	0.00706264
CASP7	ARHGDIA	2	2	73	3466	0.000443597	0.00706492
CASP7	ARHGDIB	2	2	79	3466	0.000519514	0.00774175
CASP7	MVD	2	2	81	3466	0.000546151	0.00806771
CASP7	CASP9	2	2	57	3466	0.000270453	0.00559135
CASP7	CASP6	2	2	53	3466	0.000233827	0.00502857
CASP7	NUCB2	2	2	56	3466	0.000261047	0.00544518
CASP7	RAD51	2	2	72	3466	0.000431527	0.00706264
CASP7	BAX	2	2	64	3466	0.00034096	0.00666496
CASP7	PAK2	2	2	76	3466	0.000480806	0.00749907
CASP7	ROCK1	2	2	49	3466	0.000199864	0.00454933
CASP7	BIRC3	2	2	67	3466	0.000373674	0.00698404
CASP7	PTGES3	2	2	73	3466	0.000443597	0.00706492
CASP7	COPS6	2	2	71	3466	0.000419623	0.00706264
CASP7	CNDP2	2	2	75	3466	0.000468237	0.0073297
CASP7	GINS2	2	2	83	3466	0.000573455	0.00838474
CASP7	HEL-S-47e	2	2	73	3466	0.000443597	0.00706492
CDH4	UBE2I	5	6	337	6723	1.82e-06	7.39e-05
CDH4	CDK5RAP3	5	6	273	6723	6.4e-07	2.69e-05
TPTE	TUBB3	3	5	134	4194	0.000310727	0.0063233
MTCP1	AKT2	3	4	28	2990	3.26e-06	0.000130229
JAM2	SOX8	1	2	2	5937	0.000673627	0.00936544
JAM2	JAM2	2	2	115	5937	0.000375199	0.00700324
CLDN2	UBE2I	3	4	117	3410	0.00015741	0.00389158
CLDN2	TJP2	3	4	103	3410	0.000107735	0.00285429
ADAMTS12	CALM3	3	17	82	9778	0.000367235	0.0068873
ADAMTS12	A2M	3	17	82	9778	0.000367235	0.0068873
ADAMTS12	COMP	3	17	82	9778	0.000367235	0.0068873
ADAMTS12	MEOX2	3	17	82	9778	0.000367235	0.0068873
ADAMTS12	MYL6	3	17	82	9778	0.000367235	0.0068873
ADAMTS12	CALM1	3	17	82	9778	0.000367235	0.0068873
PTEN	AKT1	2	4	37	10048	8.1e-05	0.0023214
PTEN	IL24	2	4	37	10048	8.1e-05	0.0023214
PTEN	STK11	2	4	43	10048	0.000109257	0.00285429
PTEN	HEL164	2	4	34	10048	6.84e-05	0.00197763
S100A10	AHNAK	2	2	18	1543	0.000136086	0.00344242
KCNJ2	TRAK2	3	4	198	5577	0.000174234	0.00413222
KCNJ2	FLNA	3	4	198	5577	0.000174234	0.00413222
KCNJ2	DLG4	3	4	198	5577	0.000174234	0.00413222
KCNJ2	IL16	3	4	198	5577	0.000174234	0.00413222
FAM3A	CREB3	2	4	42	6240	0.000269386	0.00557352
FAM3A	PACRGL	2	4	45	6240	0.000309045	0.00629848
SPTBN1	GOLGA6L10	3	6	299	16722	0.000109801	0.00285429
SPTBN1	PSMA7	3	6	299	16722	0.000109801	0.00285429
SPTBN1	SMAD9	3	6	299	16722	0.000109801	0.00285429
SPTBN1	SH3BP5	3	6	299	16722	0.000109801	0.00285429
SPTBN1	SNAPIN	3	6	299	16722	0.000109801	0.00285429
SPTBN1	SPTA1	3	6	299	16722	0.000109801	0.00285429
SPTBN1	FN1	3	6	299	16722	0.000109801	0.00285429
SPTBN1	HSPB1	3	6	299	16722	0.000109801	0.00285429
SPTBN1	PRKAR1A	3	6	299	16722	0.000109801	0.00285429
SPTBN1	POU2F1	3	6	299	16722	0.000109801	0.00285429
SPTBN1	CDH2	3	6	299	16722	0.000109801	0.00285429
SPTBN1	VCAM1	3	6	299	16722	0.000109801	0.00285429
SPTBN1	NFKB1	3	6	299	16722	0.000109801	0.00285429
SPTBN1	APC	3	6	299	16722	0.000109801	0.00285429
SPTBN1	MCM5	3	6	299	16722	0.000109801	0.00285429
SPTBN1	NF2	3	6	299	16722	0.000109801	0.00285429
SPTBN1	STAT1	3	6	299	16722	0.000109801	0.00285429
SPTBN1	GRIA2	3	6	299	16722	0.000109801	0.00285429
SPTBN1	NCAPD3	3	6	299	16722	0.000109801	0.00285429
SPTBN1	EIF2B2	3	6	299	16722	0.000109801	0.00285429
SPTBN1	COPB1	3	6	299	16722	0.000109801	0.00285429
SPTBN1	STXBP1	3	6	299	16722	0.000109801	0.00285429
SPTBN1	GRB2	3	6	299	16722	0.000109801	0.00285429
SPTBN1	CSNK2A1	3	6	299	16722	0.000109801	0.00285429
SPTBN1	ANK2	3	6	299	16722	0.000109801	0.00285429
SPTBN1	MEF2C	3	6	299	16722	0.000109801	0.00285429
SPTBN1	SREBF2	3	6	299	16722	0.000109801	0.00285429
SPTBN1	SPTAN1	3	6	299	16722	0.000109801	0.00285429
SPTBN1	MAPK14	3	6	299	16722	0.000109801	0.00285429
SPTBN1	DBN1	3	6	299	16722	0.000109801	0.00285429
SPTBN1	CAMSAP1	3	6	299	16722	0.000109801	0.00285429
SPTBN1	EIF3S3	3	6	299	16722	0.000109801	0.00285429
SPTBN1	RINT1	3	6	299	16722	0.000109801	0.00285429
SPTBN1	ATF7IP	3	6	299	16722	0.000109801	0.00285429
SPTBN1	TRAF3IP1	3	6	299	16722	0.000109801	0.00285429
SPTBN1	THAP3	3	6	299	16722	0.000109801	0.00285429
SPTBN1	SEPTIN8	3	6	299	16722	0.000109801	0.00285429
SPTBN1	CAVIN3	3	6	299	16722	0.000109801	0.00285429
SPTBN1	CPNE4	3	6	299	16722	0.000109801	0.00285429
SPTBN1	ZNF512B	3	6	299	16722	0.000109801	0.00285429
SPTBN1	CEP63	3	6	299	16722	0.000109801	0.00285429
SPTBN1	CDC5L	3	6	299	16722	0.000109801	0.00285429
SPTBN1	TXN2	3	6	299	16722	0.000109801	0.00285429
SPTBN1	ZNF251	3	6	299	16722	0.000109801	0.00285429
SPTBN1	PACSIN1	3	6	299	16722	0.000109801	0.00285429
SPTBN1	TNKS1BP1	3	6	299	16722	0.000109801	0.00285429
SPTBN1	PLEKHA5	3	6	299	16722	0.000109801	0.00285429
SPTBN1	PLCB1	3	6	299	16722	0.000109801	0.00285429
SPTBN1	DISC1	3	6	299	16722	0.000109801	0.00285429
SPTBN1	DDX19A	3	6	299	16722	0.000109801	0.00285429
SPTBN1	NOP53	3	6	299	16722	0.000109801	0.00285429
SPTBN1	RABL2A	3	6	299	16722	0.000109801	0.00285429
SPTBN1	NXF1	3	6	299	16722	0.000109801	0.00285429
SPTBN1	TNIK	3	6	299	16722	0.000109801	0.00285429
SPTBN1	NENF	3	6	299	16722	0.000109801	0.00285429
SPTBN1	MOB4	3	6	299	16722	0.000109801	0.00285429
SPTBN1	PYGO1	3	6	299	16722	0.000109801	0.00285429
SPTBN1	RBM8A	3	6	299	16722	0.000109801	0.00285429
SPTBN1	HEL-S-102	3	6	299	16722	0.000109801	0.00285429
SPTBN1	HEL-S-89n	3	6	299	16722	0.000109801	0.00285429
SPTBN1	HEL-S-44	3	6	299	16722	0.000109801	0.00285429
FLI1	PIAS1	2	4	88	8479	0.000637381	0.0091574
FLI1	PIAS2	2	4	93	8479	0.000711306	0.00977444
FLI1	TDP2	2	4	93	8479	0.000711306	0.00977444
FLI1	GATA1	2	4	97	8479	0.000773319	0.00995169
FLI1	ETV6	2	4	96	8479	0.000757577	0.00980679
FLI1	PRKCD	2	4	90	8479	0.000666471	0.00929934
TNFAIP2	TOPBP1	2	3	41	5029	0.000198316	0.00451787
MVK	EWSR1	2	3	74	5618	0.00051593	0.00774175
MVK	POT1	2	3	74	5618	0.00051593	0.00774175
CACNB2	PRKACA	4	6	274	6537	4.32e-05	0.0013463
CPSF1	CPSF4	2	3	67	6096	0.000359739	0.00680757
CPSF1	CSTF2	2	3	67	6096	0.000359739	0.00680757
CPSF1	PRRC2A	2	3	67	6096	0.000359739	0.00680757
CPSF1	REL	2	3	67	6096	0.000359739	0.00680757
CPSF1	CHD3	2	3	67	6096	0.000359739	0.00680757
CPSF1	FIP1L1	2	3	67	6096	0.000359739	0.00680757
CPSF1	SYMPK	2	3	67	6096	0.000359739	0.00680757
CPSF1	MED8	2	3	67	6096	0.000359739	0.00680757
CPSF1	RNPC3	2	3	67	6096	0.000359739	0.00680757
CPSF1	GLIS2	2	3	67	6096	0.000359739	0.00680757
CPSF1	WDR33	2	3	67	6096	0.000359739	0.00680757
CPSF1	CPSF2	2	3	67	6096	0.000359739	0.00680757
CPSF1	CPSF3	2	3	67	6096	0.000359739	0.00680757
CPSF1	GTF3C3	2	3	67	6096	0.000359739	0.00680757
CPSF1	HEL-S-80p	2	3	67	6096	0.000359739	0.00680757
KIF1A	NR3C4	4	11	247	12357	4.71e-05	0.00140895
KIF1A	NR2B1	4	11	247	12357	4.71e-05	0.00140895
KIF1A	PLSCR1	4	11	247	12357	4.71e-05	0.00140895
KIF1A	SPRY2	4	11	247	12357	4.71e-05	0.00140895
KIF1A	RGS20	4	11	247	12357	4.71e-05	0.00140895
KIF1A	TSPOAP1	4	11	247	12357	4.71e-05	0.00140895
KIF1A	ESR1	4	11	247	12357	4.71e-05	0.00140895
KIF1A	SP1	4	11	247	12357	4.71e-05	0.00140895
KIF1A	AR	4	11	247	12357	4.71e-05	0.00140895
KIF1A	TRIM27	4	11	247	12357	4.71e-05	0.00140895
KIF1A	RXRA	4	11	247	12357	4.71e-05	0.00140895
KIF1A	PSMA3	4	11	247	12357	4.71e-05	0.00140895
KIF1A	PPARG	4	11	247	12357	4.71e-05	0.00140895
KIF1A	FXR2	4	11	247	12357	4.71e-05	0.00140895
KIF1A	MKRN3	4	11	247	12357	4.71e-05	0.00140895
KIF1A	TRAF1	4	11	247	12357	4.71e-05	0.00140895
KIF1A	MED1	4	11	247	12357	4.71e-05	0.00140895
KIF1A	TRIP6	4	11	247	12357	4.71e-05	0.00140895
KIF1A	MTUS2	4	11	247	12357	4.71e-05	0.00140895
KIF1A	TNS2	4	11	247	12357	4.71e-05	0.00140895
KIF1A	NOTCH2NLA	4	11	247	12357	4.71e-05	0.00140895
KIF1A	RFX6	4	11	247	12357	4.71e-05	0.00140895
KIF1A	RBPMS	4	11	247	12357	4.71e-05	0.00140895
KIF1A	RNF31	4	11	247	12357	4.71e-05	0.00140895
KIF1A	MDFI	4	11	247	12357	4.71e-05	0.00140895
KIF1A	DKFZp434K1772	4	11	247	12357	4.71e-05	0.00140895
KIF1A	MID2	4	11	247	12357	4.71e-05	0.00140895
KIF1A	MAPK8IP3	4	11	247	12357	4.71e-05	0.00140895
KIF1A	HEL-S-61	4	11	247	12357	4.71e-05	0.00140895
TRO	CACNB4	2	6	16	6716	8.46e-05	0.00240798
TRO	PRKCD	2	6	16	6716	8.46e-05	0.00240798
TRO	FHL3	2	6	16	6716	8.46e-05	0.00240798
TRO	BYSL	2	6	16	6716	8.46e-05	0.00240798
TRO	USP7	2	6	16	6716	8.46e-05	0.00240798
DLG1	MRPS34	2	3	170	11001	0.000709018	0.00977105
DLG1	KCNA1	2	3	160	11001	0.000628442	0.00906719
CALCOCO2	CWF19L2	2	3	84	8333	0.000302795	0.00621376
GRIN2B	AP4M1	3	11	420	27217	0.000552557	0.00812712
GRIN2B	ACTN2	3	11	353	27217	0.000332969	0.00655292
GRIN2B	DLG1	3	11	353	27217	0.000332969	0.00655292
GRIN2B	CAMK2G	3	11	420	27217	0.000552557	0.00812712
GRIN2B	SPTAN1	3	11	353	27217	0.000332969	0.00655292
GRIN2B	IL16	3	11	353	27217	0.000332969	0.00655292
GRIN2B	MAGI3	3	11	353	27217	0.000332969	0.00655292
GRIN2B	PATJ	3	11	353	27217	0.000332969	0.00655292
GRIN2B	AP2M1	3	11	420	27217	0.000552557	0.00812712
GRIN2B	AP1M1	3	11	420	27217	0.000552557	0.00812712
MTA1	MNAT1	2	3	108	6964	0.000714065	0.00979082
MTA1	CSNK1G2	2	3	110	6964	0.000740613	0.00980679
MTA1	NOTCH2NLA	2	3	92	6964	0.000518964	0.00774175
MTA1	MBD3L2	2	3	108	6964	0.000714065	0.00979082
MTA1	SH3GLB1	2	3	108	6964	0.000714065	0.00979082
SMAD4	HEL112	2	4	69	13363	0.000158872	0.00391707
SMAD4	SERPINA1	2	4	62	13363	0.000128362	0.00328976
SMAD4	RRAS2	2	4	61	13363	0.000124267	0.00319985
SMAD4	PPP2CB	2	4	71	13363	0.000168182	0.00409843
SMAD4	RPS27A	2	4	69	13363	0.000158872	0.00391707
SMAD4	UBE2I	2	4	68	13363	0.000154316	0.00383245
SMAD4	RMND5B	2	4	72	13363	0.000172935	0.00413222
SMAD4	DACH1	2	4	62	13363	0.000128362	0.00328976
SMAD4	ARL5A	2	4	82	13363	0.000224084	0.0048535
COG2	ATP6V1A	2	3	27	11086	1.78e-05	0.000629175
RAB39A	RAB3GAP1	2	2	36	1830	0.000386993	0.00706264
RAB39A	BLZF1	2	2	32	1830	0.000305772	0.00624109
TNIP1	RARG	1	2	2	6145	0.00065083	0.00923867
TNIP1	HDDC3	1	2	2	6145	0.00065083	0.00923867
ANGPT1	MAPK8IP2	2	4	78	7117	0.000710199	0.00977117
SF3B3	LSM4	2	2	186	9666	0.000370282	0.00693641
NFKBIB	TSPAN1	2	2	33	2324	0.00020163	0.00456471
NFKBIB	PPARG	2	2	57	2324	0.000601558	0.00872547
NFKBIB	FHL3	2	2	31	2324	0.000177931	0.00413993
NFKBIB	ESR2	2	2	28	2324	0.000145159	0.00364153
TAB1	DVL2	4	6	53	4456	2.95e-07	1.27e-05
TAB1	OGT	5	6	177	4456	5.74e-07	2.42e-05
TAB1	MAP3K7	5	6	183	4456	6.77e-07	2.81e-05
TAB1	HNRNPR	4	6	108	4456	4.98e-06	0.000187213
TAB1	URB1	4	6	108	4456	4.98e-06	0.000187213
TAB1	NXPH3	4	6	44	4456	1.4e-07	6.12e-06
TAB1	EGFR	5	6	183	4456	6.77e-07	2.81e-05
TAB1	FN1	4	6	108	4456	4.98e-06	0.000187213
TAB1	POLR3D	4	6	108	4456	4.98e-06	0.000187213
TAB1	CKB	3	6	59	4456	4.51e-05	0.00139619
TAB1	CFL1	3	6	61	4456	4.97e-05	0.00148088
TAB1	RPL10	3	6	58	4456	4.28e-05	0.00133617
TAB1	LAP3	4	6	69	4456	8.41e-07	3.44e-05
TAB1	SERPINA4	5	6	183	4456	6.77e-07	2.81e-05
TAB1	PPP2R1A	5	6	183	4456	6.77e-07	2.81e-05
TAB1	CORO1A	3	6	56	4456	3.86e-05	0.00120665
TAB1	BMPR1A	3	6	54	4456	3.46e-05	0.00109179
TAB1	NR2C2	3	6	47	4456	2.29e-05	0.000806331
TAB1	CASP6	3	6	60	4456	4.74e-05	0.00141459
TAB1	PPP2CB	3	6	54	4456	3.46e-05	0.00109179
TAB1	FADD	3	6	74	4456	8.82e-05	0.00247756
TAB1	MAP3K1	4	6	106	4456	4.62e-06	0.000180062
TAB1	WTAP	4	6	108	4456	4.98e-06	0.000187213
TAB1	ZMYND11	4	6	50	4456	2.34e-07	1.01e-05
TAB1	PPP1R7	3	6	61	4456	4.97e-05	0.00148088
TAB1	TRIP6	3	6	52	4456	3.1e-05	0.000996652
TAB1	SNRNP35	4	6	58	4456	4.22e-07	1.79e-05
TAB1	DBN1	4	6	108	4456	4.98e-06	0.000187213
TAB1	DKFZp686A13234	4	6	108	4456	4.98e-06	0.000187213
TAB1	MON1A	4	6	108	4456	4.98e-06	0.000187213
TAB1	MAPKAPK5	5	6	183	4456	6.77e-07	2.81e-05
TAB1	PHC2	4	6	108	4456	4.98e-06	0.000187213
TAB1	LNX2	4	6	106	4456	4.62e-06	0.000180062
TAB1	MICAL1	4	6	108	4456	4.98e-06	0.000187213
TAB1	TRPC4AP	4	6	108	4456	4.98e-06	0.000187213
TAB1	PDCD6IP	5	6	183	4456	6.77e-07	2.81e-05
TAB1	KIFC2	4	6	108	4456	4.98e-06	0.000187213
TAB1	CDK5RAP3	4	6	108	4456	4.98e-06	0.000187213
TAB1	PHACTR3	4	6	108	4456	4.98e-06	0.000187213
TAB1	ARAP1	4	6	108	4456	4.98e-06	0.000187213
TAB1	ACAP3	4	6	108	4456	4.98e-06	0.000187213
TAB1	CARD11	4	6	108	4456	4.98e-06	0.000187213
TAB1	MTG2	5	6	183	4456	6.77e-07	2.81e-05
TAB1	WDCP	4	6	108	4456	4.98e-06	0.000187213
TAB1	SMURF1	5	6	177	4456	5.74e-07	2.42e-05
TAB1	TAB2	4	6	108	4456	4.98e-06	0.000187213
TAB1	C9orf78	3	6	60	4456	4.74e-05	0.00141459
TAB1	XPO7	5	6	183	4456	6.77e-07	2.81e-05
TAB1	LCMT1	3	6	63	4456	5.47e-05	0.00162086
TAB1	MAPK8IP1	4	6	106	4456	4.62e-06	0.000180062
TAB1	POLDIP2	3	6	59	4456	4.51e-05	0.00139619
TAB1	GIT1	4	6	108	4456	4.98e-06	0.000187213
TAB1	TRAF6	4	6	108	4456	4.98e-06	0.000187213
TAB1	TSSC4	4	6	108	4456	4.98e-06	0.000187213
TAB1	HEL-S-29	3	6	59	4456	4.51e-05	0.00139619
TAB1	HEL-S-15	3	6	61	4456	4.97e-05	0.00148088
PPP2R5E	PPP2CA	2	3	97	9188	0.000332013	0.00655292
MRPL23	NDUFAB1	2	2	63	2975	0.000448443	0.00711792
MRPL23	MTHFD1	2	2	70	2975	0.000553633	0.00813856
MRPL23	RPS2	2	2	56	2975	0.000354325	0.00680429
MRPL23	CDH2	2	2	63	2975	0.000448443	0.00711792
MRPL23	MPV17	2	2	57	2975	0.000367093	0.0068873
MRPL23	TUFM	2	2	68	2975	0.000522449	0.00774275
MRPL23	MRPL12	2	2	57	2975	0.000367093	0.0068873
MRPL23	RPS20	2	2	56	2975	0.000354325	0.00680429
MRPL23	RPS15	2	2	62	2975	0.00043432	0.00706264
MRPL23	MRPS10	2	2	57	2975	0.000367093	0.0068873
MRPL23	MRPS9	2	2	60	2975	0.000406751	0.00706264
MRPL23	SSBP1	2	2	67	2975	0.000507196	0.00774175
MRPL23	ILF3	2	2	61	2975	0.000420422	0.00706264
MRPL23	MRPL28	2	2	58	2975	0.000380086	0.00706264
MRPL23	MRPL58	2	2	55	2975	0.000341784	0.00667629
MRPL23	OXA1L	2	2	59	2975	0.000393306	0.00706264
MRPL23	MRPL51	2	2	56	2975	0.000354325	0.00680429
MRPL23	MRPL2	2	2	68	2975	0.000522449	0.00774275
MRPL23	HNRNPK	2	2	64	2975	0.000462792	0.00726183
MRPL23	MRPL55	2	2	60	2975	0.000406751	0.00706264
MRPL23	MRPL10	2	2	64	2975	0.000462792	0.00726183
MRPL23	PNMA1	2	2	67	2975	0.000507196	0.00774175
MRPL23	ASB10	2	2	57	2975	0.000367093	0.0068873
MRPL23	ABCC2	2	2	67	2975	0.000507196	0.00774175
MRPL23	CAVIN3	2	2	62	2975	0.00043432	0.00706264
MRPL23	TXN2	2	2	60	2975	0.000406751	0.00706264
MRPL23	MRPL9	2	2	59	2975	0.000393306	0.00706264
MRPL23	MRPL4	2	2	63	2975	0.000448443	0.00711792
MRPL23	PPT2	2	2	66	2975	0.000492169	0.00761256
MRPL23	NENF	2	2	58	2975	0.000380086	0.00706264
MRPL23	MRPL42	2	2	62	2975	0.00043432	0.00706264
CDC37	DAPK3	2	2	82	3041	0.000727101	0.00980679
CDC37	AHCYL1	2	2	82	3041	0.000727101	0.00980679
CDC37	KERA	2	2	79	3041	0.000674872	0.00936544
CDC37	RGS11	2	2	74	3041	0.000592148	0.0086303
CDC37	MOS	2	2	85	3041	0.000781277	0.00999637
CDC37	APOE	2	2	81	3041	0.000709475	0.00977105
CDC37	TPM1	2	2	82	3041	0.000727101	0.00980679
CDC37	CDK4	2	2	82	3041	0.000727101	0.00980679
CDC37	FER	2	2	80	3041	0.000692065	0.00956509
CDC37	MAK	2	2	85	3041	0.000781277	0.00999637
CDC37	GCH1	2	2	78	3041	0.000657895	0.00929934
CDC37	MAP3K8	2	2	80	3041	0.000692065	0.00956509
CDC37	PSEN1	2	2	76	3041	0.000624589	0.00902592
CDC37	IRAK1	2	2	82	3041	0.000727101	0.00980679
CDC37	RPS15A	2	2	85	3041	0.000781277	0.00999637
CDC37	CSNK2A1	2	2	80	3041	0.000692065	0.00956509
CDC37	CDK6	2	2	73	3041	0.000576253	0.00842113
CDC37	MEF2B	2	2	61	3041	0.000402371	0.00706264
CDC37	MRPL28	2	2	77	3041	0.000641134	0.00920162
CDC37	TNK1	2	2	77	3041	0.000641134	0.00920162
CDC37	CRYM	2	2	69	3041	0.000514832	0.00774175
CDC37	NR1I3	2	2	82	3041	0.000727101	0.00980679
CDC37	CDK10	2	2	85	3041	0.000781277	0.00999637
CDC37	MZT2B	2	2	67	3041	0.000485419	0.00752872
CDC37	KLHDC10	2	2	78	3041	0.000657895	0.00929934
CDC37	PATL1	2	2	82	3041	0.000727101	0.00980679
CDC37	PDIK1L	2	2	79	3041	0.000674872	0.00936544
CDC37	PPHLN1	2	2	65	3041	0.000456871	0.00723906
CDC37	DPF1	2	2	67	3041	0.000485419	0.00752872
CDC37	GCDH	2	2	79	3041	0.000674872	0.00936544
CDC37	MAP3K14	2	2	79	3041	0.000674872	0.00936544
CDC37	PINK1	2	2	85	3041	0.000781277	0.00999637
CDC37	RNF32	2	2	69	3041	0.000514832	0.00774175
CDC37	WDR70	2	2	81	3041	0.000709475	0.00977105
CDC37	FBXL12	2	2	78	3041	0.000657895	0.00929934
CAMK4	HSP90AB1	2	2	163	13910	0.000137316	0.00346069
ATP2B3	CLGN	3	15	87	7534	0.000631403	0.0090763
ATP2B3	CANX	3	15	87	7534	0.000631403	0.0090763
ATP2B3	YWHAE	3	15	87	7534	0.000631403	0.0090763
ATP2B3	HM13	3	15	87	7534	0.000631403	0.0090763
ATP2B3	COX2	3	15	87	7534	0.000631403	0.0090763
HLA-B	LILRB2	2	4	14	3012	0.000128826	0.00329854
UAP1L1	OAT	3	5	142	5283	0.000186443	0.00429402
UAP1L1	AFMID	2	5	47	5283	0.000777481	0.00999637
FAM135B	ZDHHC17	2	10	52	13625	0.000642251	0.00920796
FAM135B	KAT5	2	10	52	13625	0.000642251	0.00920796
ARHGAP15	KDM1A	3	4	67	7743	2.57e-06	0.000102947
ARHGAP15	PRNP	3	4	67	7743	2.57e-06	0.000102947
ARHGAP15	TGFBR1	2	4	35	7743	0.000121856	0.00314371
ARHGAP15	RAC1	3	4	40	7743	5.49e-07	2.33e-05
ARHGAP15	SMURF1	3	4	67	7743	2.57e-06	0.000102947
ARHGAP15	CD93	2	4	34	7743	0.000115012	0.00298408
HERC4	FKBP9	2	4	38	15838	3.44e-05	0.00108789
HERC4	HEXA	2	4	38	15838	3.44e-05	0.00108789
HERC4	HSP90AB1	2	4	38	15838	3.44e-05	0.00108789
HERC4	UBC	2	4	38	15838	3.44e-05	0.00108789
HERC4	WARS1	2	4	38	15838	3.44e-05	0.00108789
HERC4	USP5	2	4	38	15838	3.44e-05	0.00108789
HERC4	NT5C2	2	4	38	15838	3.44e-05	0.00108789
HERC4	RAD23A	2	4	38	15838	3.44e-05	0.00108789
HERC4	HERC4	2	4	38	15838	3.44e-05	0.00108789
HERC4	H2AZ2	2	4	38	15838	3.44e-05	0.00108789
HERC4	DCTPP1	2	4	38	15838	3.44e-05	0.00108789
HERC4	NUBP2	2	4	38	15838	3.44e-05	0.00108789
PITRM1	NDUFV2	4	6	205	6949	1.08e-05	0.000399136
PITRM1	SUCLG2	4	6	205	6949	1.08e-05	0.000399136
PITRM1	HDHD3	4	6	205	6949	1.08e-05	0.000399136
PITRM1	DDX41	4	6	205	6949	1.08e-05	0.000399136
PITRM1	HEL-S-128m	4	6	205	6949	1.08e-05	0.000399136
TPRN	UTP20	2	5	23	5276	0.000188389	0.00432787
TPRN	RB1	2	5	23	5276	0.000188389	0.00432787
TPRN	PPP1CA	2	5	23	5276	0.000188389	0.00432787
TPRN	AMOT	3	14	97	9371	0.000370617	0.00693641
TPRN	ASH2L	3	14	97	9371	0.000370617	0.00693641
TPRN	PLCG2	2	2	20	4007	2.49e-05	0.000853449
TPRN	NUTM1	2	2	20	4007	2.49e-05	0.000853449
TPRN	SCYL3	2	2	20	4007	2.49e-05	0.000853449
CBLN3	CBLN4	2	2	52	2562	0.000411954	0.00706264
KSR2	HSP90AA1	2	2	133	18298	5.28e-05	0.00156595
KSR2	HSP90AB1	2	2	133	18298	5.28e-05	0.00156595
KSR2	FKBP5	2	2	133	18298	5.28e-05	0.00156595
KSR2	CDC37	2	2	133	18298	5.28e-05	0.00156595
ARHGAP27	CDC42	2	2	194	10419	0.000346698	0.00670317
ARHGAP27	RAC1	2	2	213	10419	0.000417933	0.00706264
ADAMTS13	F8	3	5	200	5695	0.000410625	0.00706264
ADAMTS13	VWF	3	5	200	5695	0.000410625	0.00706264
KANSL1	HSPB1	1	1	7	13921	0.000502837	0.00773808
KANSL1	HEL-S-102	1	1	7	13921	0.000502837	0.00773808
CSMD2	ABL1	5	23	140	18147	8.19e-07	3.36e-05
CSMD2	FYN	5	23	140	18147	8.19e-07	3.36e-05
CSMD2	NCK1	5	23	140	18147	8.19e-07	3.36e-05
CSMD2	PLCG1	5	23	140	18147	8.19e-07	3.36e-05
CSMD2	CRK	5	23	140	18147	8.19e-07	3.36e-05
MROH2B	UGP2	3	13	86	6085	0.000726022	0.00980679
RALYL	EWSR1	2	3	72	4538	0.000747204	0.00980679
RALYL	RALYL	2	3	72	4538	0.000747204	0.00980679
RALYL	ZNF408	2	3	72	4538	0.000747204	0.00980679
RALYL	THAP1	2	3	44	4538	0.000280208	0.00577115
PHLDB2	CLK1	2	4	74	12109	0.000222256	0.00483264
PHLDB2	USP7	2	4	74	12109	0.000222256	0.00483264
PACS2	YWHAZ	1	2	4	12363	0.000646987	0.00923218
MYLK4	HSP90AB1	2	2	120	5877	0.000416918	0.00706264
MYLK4	CDC37	2	2	39	5877	4.4e-05	0.00136926
TICAM1	TLR3	2	2	69	2676	0.000664854	0.00929934
TICAM1	SRSF4	2	2	69	2676	0.000664854	0.00929934
TICAM1	TRAF2	2	2	69	2676	0.000664854	0.00929934
TICAM1	TRAF1	2	2	69	2676	0.000664854	0.00929934
TICAM1	TRAF3	2	2	69	2676	0.000664854	0.00929934
TICAM1	TICAM2	2	2	69	2676	0.000664854	0.00929934
TICAM1	TRAF6	2	2	69	2676	0.000664854	0.00929934
RBM45	TXN2	1	1	3	4784	0.00062709	0.00905248
RBM45	MEMO1	1	1	3	4784	0.00062709	0.00905248
TIAM2	TK1	3	6	298	11532	0.000325462	0.00647811
TIAM2	H2AX	3	6	298	11532	0.000325462	0.00647811
TIAM2	ANXA7	3	6	298	11532	0.000325462	0.00647811
TIAM2	DNM2	3	6	298	11532	0.000325462	0.00647811
TIAM2	UFD1L	3	6	301	11532	0.000335191	0.00658524
TIAM2	UFD1	3	6	298	11532	0.000325462	0.00647811
TIAM2	SH3GL2	3	6	298	11532	0.000325462	0.00647811
TIAM2	DISC1	3	6	298	11532	0.000325462	0.00647811
TIAM2	TNIK	3	6	298	11532	0.000325462	0.00647811
DNAJC10	HSPA4L	2	2	294	21586	0.000185503	0.00427597
DNAJC10	HSPA4	2	2	294	21586	0.000185503	0.00427597
DNAJC10	MAGEA11	2	2	294	21586	0.000185503	0.00427597
SIRT2	SIRT2	2	2	140	6204	0.000509228	0.00774175
KMT2E	OGT	2	3	119	9227	0.000494702	0.00763011
KMT2E	LAMTOR5	2	3	119	9227	0.000494702	0.00763011
KMT2E	CDK1	2	3	119	9227	0.000494702	0.00763011
KMT2E	MYB	2	3	119	9227	0.000494702	0.00763011
KMT2E	KMT2E	2	3	119	9227	0.000494702	0.00763011
LILRB2	ANGPTL5	4	5	295	3810	0.000168573	0.0041043
CPXM2	SMAD9	3	5	119	4689	0.000157297	0.00389158
CYB561A3	AOC1	1	1	6	10597	0.000566198	0.00830535
GEMIN5	EIF4E	3	7	45	5637	1.74e-05	0.000617225
GEMIN5	MAP2K4	3	7	45	5637	1.74e-05	0.000617225
GEMIN5	CLK1	3	7	45	5637	1.74e-05	0.000617225
GEMIN5	EWSR1	3	7	45	5637	1.74e-05	0.000617225
GEMIN5	PLOD1	3	7	45	5637	1.74e-05	0.000617225
GEMIN5	DDX46	3	7	45	5637	1.74e-05	0.000617225
GEMIN5	GEMIN5	3	7	45	5637	1.74e-05	0.000617225
GEMIN5	DDX1	3	7	45	5637	1.74e-05	0.000617225
GEMIN5	MAP3K5	3	7	45	5637	1.74e-05	0.000617225
IPO4	TRMT112	2	2	99	5007	0.000390945	0.00706264
ZNRF4	UBE2D3	3	8	7	1442	6.29e-06	0.000235294
RAB40A	HSP90AB1	3	3	101	3398	2.63e-05	0.000897807
RAB40A	ANKRD27	3	3	81	3398	1.35e-05	0.000491175
ELMO1	ADGRB1	2	3	128	9767	0.000510749	0.00774175
ELMO1	ADGRB3	2	3	128	9767	0.000510749	0.00774175
ELMO1	CDC27	2	3	128	9767	0.000510749	0.00774175
ELMO1	ARL4A	2	3	128	9767	0.000510749	0.00774175
ELMO1	DOCK1	2	3	128	9767	0.000510749	0.00774175
ELMO1	ARHG	2	3	131	9767	0.000534861	0.00791809
ELMO1	DOCK3	2	3	128	9767	0.000510749	0.00774175
ELMO1	DOCK4	2	3	128	9767	0.000510749	0.00774175
ELMO1	ZNF398	2	3	129	9767	0.000518725	0.00774175
ELMO1	DOCK2	2	3	59	9767	0.000109031	0.00285429
ELMO1	TRIM54	2	3	129	9767	0.000518725	0.00774175
ELMO1	DOCK5	2	3	128	9767	0.000510749	0.00774175
DOCK2	HNRNPK	6	11	225	12816	1.25e-08	6.36e-07
RYR2	PRKAR2A	7	48	442	17799	0.000175387	0.00413222
RYR2	PRKACA	7	48	442	17799	0.000175387	0.00413222
RYR2	PRKACG	7	48	442	17799	0.000175387	0.00413222
RYR2	PRKACB	7	48	442	17799	0.000175387	0.00413222
RYR2	PRKAR2B	7	48	442	17799	0.000175387	0.00413222
RYR2	PPP1CC	7	48	442	17799	0.000175387	0.00413222
RYR2	PPP1CA	7	48	442	17799	0.000175387	0.00413222
RYR2	PPP1CB	7	48	442	17799	0.000175387	0.00413222
RYR2	FKBP1A	7	48	442	17799	0.000175387	0.00413222
RYR2	FKBP1B	6	48	346	17799	0.000328721	0.00651919
RYR2	MDM2	7	48	442	17799	0.000175387	0.00413222
RYR2	AKAP6	7	48	442	17799	0.000175387	0.00413222
RYR2	HSPB2	7	48	442	17799	0.000175387	0.00413222
RYR2	DKFZp781O1323	6	48	346	17799	0.000328721	0.00651919
RYR2	RYR2	7	48	442	17799	0.000175387	0.00413222
RYR2	SMAD5	6	48	346	17799	0.000328721	0.00651919
RYR2	HEL-S-80p	7	48	442	17799	0.000175387	0.00413222
EDA	LEPROTL1	2	2	74	6401	0.00013365	0.00339971
EDA	MAL	2	2	72	6401	0.000126523	0.0032518
EDA	PLN	2	2	104	6401	0.00026398	0.00546581
EDA	ATP6V0C	2	2	104	6401	0.00026398	0.00546581
EDA	CYB561	2	2	75	6401	0.000137286	0.00346069
EDA	EMP3	2	2	75	6401	0.000137286	0.00346069
EDA	NIPAL3	2	2	78	6401	0.000148489	0.00372164
EDA	OSTCL	2	2	73	6401	0.000130062	0.00332395
EDA	SEC22A	2	2	75	6401	0.000137286	0.00346069
EDA	OSTC	2	2	104	6401	0.00026398	0.00546581
EDA	DOLK	2	2	104	6401	0.00026398	0.00546581
UPF1	UPF1	2	3	78	8600	0.00024529	0.00525437
RPL3L	RPL9	3	6	93	2758	0.0007102	0.00977117
RPL3L	RPS8	3	6	96	2758	0.000779217	0.00999637
RPL3L	RPS23	3	6	95	2758	0.00075575	0.00980679
RPL3L	RPL23A	3	6	92	2758	0.00068811	0.00952974
RPL3L	RPS6	3	6	95	2758	0.00075575	0.00980679
RPL3L	RPL23	3	6	95	2758	0.00075575	0.00980679
RPL3L	RPS26	3	6	94	2758	0.000732746	0.00980679
TRIM63	TNNT1	2	2	47	2573	0.000333669	0.00656008
TRIM63	TNNT3	2	2	50	2573	0.000377625	0.0070434
TRIM63	MRPL19	2	2	44	2573	0.000292433	0.00601383
TRIM63	MRPL41	2	2	57	2573	0.000490761	0.0075951
SYAP1	PSMB4	2	2	54	6418	7.08e-05	0.00204496
SYAP1	ETF1	2	2	58	6418	8.17e-05	0.00233932
SYAP1	CBX3	2	2	57	6418	7.89e-05	0.00226888
SYAP1	POT1	2	2	55	6418	7.34e-05	0.00211916
TMEM45B	UBE2G2	1	1	1	3027	0.00033036	0.00653799
TMEM45B	VKORC1	1	1	2	3027	0.00066072	0.00929934
MIEF2	DNM1L	3	3	139	3969	4.3e-05	0.00133863
RAB39B	GOLGA2	3	4	71	3505	3.27e-05	0.00105044
RAB39B	RAB3GAP1	3	4	72	3505	3.41e-05	0.00108789
RAB39B	ZDHHC17	2	4	31	3505	0.000463835	0.00726498
RAB39B	SGSM3	2	4	38	3505	0.000695096	0.00960211
RAB39B	RUFY1	3	4	71	3505	3.27e-05	0.00105044
CHFR	PLK1	2	3	148	9214	0.000765725	0.00988194
CHFR	HDAC1	2	3	144	9214	0.000725106	0.00980679
CHFR	H2BC21	2	3	148	9214	0.000765725	0.00988194
CHFR	UBE2W	2	3	130	9214	0.000591572	0.0086265
SCMH1	HK1	2	2	98	4447	0.000485644	0.00752872
GMPPA	GMPPA	3	3	165	5331	2.97e-05	0.000956838
CNDP1	CNDP1	2	3	82	7177	0.000388635	0.00706264
JAKMIP1	NFKB1	2	3	31	3673	0.000212497	0.00466552
JAKMIP1	JAK1	2	3	31	3673	0.000212497	0.00466552
JAKMIP1	TYK2	2	3	31	3673	0.000212497	0.00466552
JAKMIP1	HTT	2	3	31	3673	0.000212497	0.00466552
JAKMIP1	JAKMIP1	2	3	31	3673	0.000212497	0.00466552
FRMD6	BLZF1	1	2	2	9416	0.000424764	0.00706264
FEZ1	NBR1	1	3	1	5932	0.000505646	0.00774175
FEZ1	OLFML3	1	3	1	5932	0.000505646	0.00774175
TIMP4	MMP3	2	2	29	1650	0.000308907	0.00629848
MDFI	TRPV6	2	4	4	2523	1.5e-05	0.000544995
UBAC1	AIRE	2	3	37	2979	0.000458958	0.00725526
UBAC1	TCEA1	2	3	36	2979	0.000434582	0.00706264
UBAC1	CSNK2A1	2	3	38	2979	0.000483992	0.00751594
UBAC1	LAPTM5	2	3	37	2979	0.000458958	0.00725526
UBAC1	DAZAP2	2	3	35	2979	0.000410867	0.00706264
UBAC1	TWF2	2	3	36	2979	0.000434582	0.00706264
UBAC1	VPS25	2	3	37	2979	0.000458958	0.00725526
UBAC1	SMURF1	2	3	34	2979	0.000387812	0.00706264
UBAC1	TRIM39	2	3	38	2979	0.000483992	0.00751594
UBAC1	UTP6	2	3	37	2979	0.000458958	0.00725526
UBAC1	RPS6KA6	2	3	36	2979	0.000434582	0.00706264
UBAC1	RNF11	2	3	36	2979	0.000434582	0.00706264
TBCD	SMAD9	2	2	57	10472	2.96e-05	0.000956838
TBCD	SNX2	2	2	57	10472	2.96e-05	0.000956838
TBCD	TOM1	2	2	57	10472	2.96e-05	0.000956838
TBCD	ATG7	2	2	57	10472	2.96e-05	0.000956838
TBCD	DEXI	2	2	57	10472	2.96e-05	0.000956838
TBCD	TPM3	2	2	57	10472	2.96e-05	0.000956838
TBCD	XRCC6	2	2	57	10472	2.96e-05	0.000956838
TBCD	APEH	2	2	57	10472	2.96e-05	0.000956838
TBCD	H1-2	2	2	57	10472	2.96e-05	0.000956838
TBCD	ARL2	2	2	57	10472	2.96e-05	0.000956838
TBCD	POLR2I	2	2	57	10472	2.96e-05	0.000956838
TBCD	STAT3	2	2	57	10472	2.96e-05	0.000956838
TBCD	STAT1	2	2	57	10472	2.96e-05	0.000956838
TBCD	ME1	2	2	57	10472	2.96e-05	0.000956838
TBCD	MTNR1B	2	2	57	10472	2.96e-05	0.000956838
TBCD	NASP	2	2	57	10472	2.96e-05	0.000956838
TBCD	SARS1	2	2	57	10472	2.96e-05	0.000956838
TBCD	GTF2A1	2	2	57	10472	2.96e-05	0.000956838
TBCD	TERF1	2	2	57	10472	2.96e-05	0.000956838
TBCD	NMI	2	2	57	10472	2.96e-05	0.000956838
TBCD	CUL3	2	2	57	10472	2.96e-05	0.000956838
TBCD	TSN	2	2	57	10472	2.96e-05	0.000956838
TBCD	PSMD5	2	2	57	10472	2.96e-05	0.000956838
TBCD	hCG_23373	2	2	57	10472	2.96e-05	0.000956838
TBCD	RPUSD2	2	2	57	10472	2.96e-05	0.000956838
TBCD	ACD	2	2	57	10472	2.96e-05	0.000956838
TBCD	VPS25	2	2	57	10472	2.96e-05	0.000956838
TBCD	WDR12	2	2	57	10472	2.96e-05	0.000956838
TBCD	ACBD3	2	2	57	10472	2.96e-05	0.000956838
TBCD	GORASP2	2	2	57	10472	2.96e-05	0.000956838
TBCD	SH3GLB2	2	2	57	10472	2.96e-05	0.000956838
TBCD	POT1	2	2	57	10472	2.96e-05	0.000956838
TBCD	VPS29	2	2	57	10472	2.96e-05	0.000956838
TBCD	HEL-S-108	2	2	57	10472	2.96e-05	0.000956838
UTP14A	SAT1	2	3	27	4087	0.000130353	0.00332828
AP1M1	DCPS	2	2	102	3813	0.000715594	0.00980473
FOXP3	PIM1	3	4	119	2578	0.000379796	0.00706264
FOXP3	PRR20E	3	4	129	2578	0.000482356	0.00749907
FOXP3	PRR20C	3	4	129	2578	0.000482356	0.00749907
FOXP3	PRR20A	3	4	129	2578	0.000482356	0.00749907
FOXP3	EP300	3	4	129	2578	0.000482356	0.00749907
FOXP3	ZFP90	3	4	129	2578	0.000482356	0.00749907
FOXP3	IKZF4	3	4	120	2578	0.000389334	0.00706264
FOXP3	STUB1	3	4	120	2578	0.000389334	0.00706264
WDR61	RNF40	2	2	55	7279	5.71e-05	0.00167947
WDR61	HK2	2	2	80	7279	0.000120792	0.00311919
WDR61	SKIV2L	2	2	80	7279	0.000120792	0.00311919
WDR61	EZH2	2	2	55	7279	5.71e-05	0.00167947
WDR61	CTR9	2	2	55	7279	5.71e-05	0.00167947
WDR61	SMURF1	2	2	80	7279	0.000120792	0.00311919
WDR61	ERRFI1	2	2	55	7279	5.71e-05	0.00167947
KLHL25	HSP90AB1	2	4	32	3758	0.000430125	0.00706264
ALX4	GATA4	2	3	50	5750	0.000225528	0.00487316
ALX4	SOX2	2	3	51	5750	0.000234612	0.00503355
ALX4	FOXA3	2	3	50	5750	0.000225528	0.00487316
ALX4	SOX10	2	3	51	5750	0.000234612	0.00503355
ALX4	CEBPE	2	3	50	5750	0.000225528	0.00487316
ALX4	HOXB13	2	3	51	5750	0.000234612	0.00503355
SDCBP2	PRPF38A	2	2	53	2044	0.000672342	0.0093589
SDCBP2	ZNF581	2	2	46	2044	0.00050647	0.00774175
ACTL8	CERT1	4	5	93	1861	2.99e-05	0.000964931
KAT8	MORF4L1	2	2	89	4334	0.000421699	0.00706264
EBF2	ZNF423	3	5	226	7077	0.000310269	0.00631869
VEZT	MYO7A	2	2	16	8757	3.34e-06	0.000132895
VEZT	VEZT	2	2	16	8757	3.34e-06	0.000132895
EML4	ARL4D	3	4	239	8357	9.16e-05	0.00256328
RAB9B	RAB9B	2	2	69	3748	0.000338921	0.00663464
NGB	FLOT1	2	3	18	1884	0.000272101	0.00561689
NGB	REL	2	3	20	1884	0.000335687	0.00659025
NGB	VAC14	2	3	19	1884	0.000303066	0.00621376
NGB	L3MBTL3	2	3	19	1884	0.000303066	0.00621376
NGB	DKFZp434J032	2	3	18	1884	0.000272101	0.00561689
PLCB1	CTBP2	3	6	312	10942	0.00043459	0.00706264
PLCB1	CTBP1	3	6	312	10942	0.00043459	0.00706264
TMPRSS4	CLEC7A	2	3	119	9922	0.000428085	0.00706264
NLE1	MTHFD1	3	3	159	5463	2.47e-05	0.000847801
NLE1	MTREX	3	3	159	5463	2.47e-05	0.000847801
NLE1	EWSR1	2	3	81	5463	0.000653002	0.00925505
ANAPC11	PTTG1	2	2	60	4020	0.000222767	0.00483264
ANAPC11	CDC20	2	2	59	4020	0.000215403	0.00472552
ANAPC11	UBE2U	2	2	60	4020	0.000222767	0.00483264
ANAPC11	TRIM65	2	2	60	4020	0.000222767	0.00483264
[truncated: 140 more rows]

## Sheet: S9b
Gene1	Gene2	k	n	M	N	P	FDR
TP53	TP53	21	33	163	3924	1.33e-15	3.51e-13
TP53	AR	20	33	144	3924	0	0
TP53	SIN3B	18	33	173	3924	1.44e-15	3.51e-13
TP53	MTA2	18	33	173	3924	1.44e-15	3.51e-13
TP53	EFEMP2	18	33	173	3924	1.44e-15	3.51e-13
TP53	HSPA1A	18	33	173	3924	1.44e-15	3.51e-13
TP53	MUC1	18	33	173	3924	1.44e-15	3.51e-13
TP53	PLCG2	18	33	173	3924	1.44e-15	3.51e-13
TP53	EGR1	18	33	173	3924	1.44e-15	3.51e-13
TP53	CR2	18	33	173	3924	1.44e-15	3.51e-13
TP53	NR4A1	18	33	173	3924	1.44e-15	3.51e-13
TP53	PML	18	33	173	3924	1.44e-15	3.51e-13
TP53	TTK	18	33	173	3924	1.44e-15	3.51e-13
TP53	SREBF1	18	33	173	3924	1.44e-15	3.51e-13
TP53	MAP1B	18	33	173	3924	1.44e-15	3.51e-13
TP53	RANBP2	18	33	173	3924	1.44e-15	3.51e-13
TP53	ELL	18	33	173	3924	1.44e-15	3.51e-13
TP53	ANK2	18	33	173	3924	1.44e-15	3.51e-13
TP53	SREBF2	18	33	173	3924	1.44e-15	3.51e-13
TP53	TRIM28	18	33	173	3924	1.44e-15	3.51e-13
TP53	USP10	18	33	173	3924	1.44e-15	3.51e-13
TP53	PRKD1	18	33	173	3924	1.44e-15	3.51e-13
TP53	DHCR24	18	33	173	3924	1.44e-15	3.51e-13
TP53	NCOA2	18	33	173	3924	1.44e-15	3.51e-13
TP53	MED1	18	33	173	3924	1.44e-15	3.51e-13
TP53	NCOA1	18	33	173	3924	1.44e-15	3.51e-13
TP53	IFI16	18	33	173	3924	1.44e-15	3.51e-13
TP53	MAP9	18	33	173	3924	1.44e-15	3.51e-13
TP53	KANSL1	18	33	173	3924	1.44e-15	3.51e-13
TP53	HUWE1	18	33	173	3924	1.44e-15	3.51e-13
TP53	FBXO11	18	33	173	3924	1.44e-15	3.51e-13
TP53	HIPK1	18	33	173	3924	1.44e-15	3.51e-13
TP53	CABLES1	18	33	173	3924	1.44e-15	3.51e-13
TP53	SMARCC1	18	33	173	3924	1.44e-15	3.51e-13
TP53	EHMT2	18	33	173	3924	1.44e-15	3.51e-13
TP53	UHRF2	18	33	173	3924	1.44e-15	3.51e-13
TP53	HIPK3	18	33	173	3924	1.44e-15	3.51e-13
TP53	USP42	18	33	173	3924	1.44e-15	3.51e-13
TP53	CXXC1	18	33	173	3924	1.44e-15	3.51e-13
TP53	ZMIZ1	18	33	173	3924	1.44e-15	3.51e-13
TP53	NCOR2	18	33	173	3924	1.44e-15	3.51e-13
TP53	DVL2	16	33	157	3924	2.55e-14	3e-12
TP53	DLEU1	16	33	157	3924	2.55e-14	3e-12
TP53	FOXO3	16	33	157	3924	2.55e-14	3e-12
TP53	PIAS1	16	33	157	3924	2.55e-14	3e-12
TP53	PIAS2	16	33	157	3924	2.55e-14	3e-12
TP53	SP1	16	33	157	3924	2.55e-14	3e-12
TP53	PARP1	16	33	157	3924	2.55e-14	3e-12
TP53	UBC	16	33	157	3924	2.55e-14	3e-12
TP53	BCR	16	33	157	3924	2.55e-14	3e-12
TP53	BMP1	16	33	157	3924	2.55e-14	3e-12
TP53	ZNF24	16	33	157	3924	2.55e-14	3e-12
TP53	NCL	16	33	157	3924	2.55e-14	3e-12
TP53	BRCA1	16	33	157	3924	2.55e-14	3e-12
TP53	HTT	16	33	157	3924	2.55e-14	3e-12
TP53	CCT5	16	33	157	3924	2.55e-14	3e-12
TP53	BRCA2	16	33	157	3924	2.55e-14	3e-12
TP53	PLK1	16	33	157	3924	2.55e-14	3e-12
TP53	BLM	16	33	157	3924	2.55e-14	3e-12
TP53	PRKDC	16	33	157	3924	2.55e-14	3e-12
TP53	UBE3A	16	33	157	3924	2.55e-14	3e-12
TP53	CHD3	16	33	157	3924	2.55e-14	3e-12
TP53	ATM	16	33	157	3924	2.55e-14	3e-12
TP53	ATR	16	33	157	3924	2.55e-14	3e-12
TP53	WRN	16	33	157	3924	2.55e-14	3e-12
TP53	KIAA0087	16	33	157	3924	2.55e-14	3e-12
TP53	CUL7	16	33	157	3924	2.55e-14	3e-12
TP53	LAMA4	16	33	157	3924	2.55e-14	3e-12
TP53	HIF1A	16	33	157	3924	2.55e-14	3e-12
TP53	CUL9	16	33	157	3924	2.55e-14	3e-12
TP53	THAP8	16	33	157	3924	2.55e-14	3e-12
TP53	ZCCHC10	16	33	157	3924	2.55e-14	3e-12
TP53	FCAMR	16	33	157	3924	2.55e-14	3e-12
TP53	KAT2B	16	33	157	3924	2.55e-14	3e-12
TP53	SIRT1	16	33	157	3924	2.55e-14	3e-12
TP53	HINFP	16	33	157	3924	2.55e-14	3e-12
TP53	CCDC106	16	33	157	3924	2.55e-14	3e-12
TP53	BTBD2	16	33	157	3924	2.55e-14	3e-12
TP53	WDR33	16	33	157	3924	2.55e-14	3e-12
TP53	HIPK2	16	33	157	3924	2.55e-14	3e-12
TP53	PLK3	16	33	157	3924	2.55e-14	3e-12
TP53	EHMT1	16	33	157	3924	2.55e-14	3e-12
TP53	TOPORS	16	33	157	3924	2.55e-14	3e-12
TP53	DAXX	16	33	157	3924	2.55e-14	3e-12
TP53	ZHX1	16	33	157	3924	2.55e-14	3e-12
TP53	PCDHA4	16	33	157	3924	2.55e-14	3e-12
TP53	SNURF	16	33	157	3924	2.55e-14	3e-12
TP53	AGT	14	33	176	3924	4.85e-11	1.25e-09
TP53	HSPA8	14	33	176	3924	4.85e-11	1.25e-09
TP53	TOP1	14	33	176	3924	4.85e-11	1.25e-09
TP53	XRCC6	14	33	176	3924	4.85e-11	1.25e-09
TP53	DDX5	14	33	176	3924	4.85e-11	1.25e-09
TP53	EIF2AK2	14	33	176	3924	4.85e-11	1.25e-09
TP53	PTGS2	14	33	176	3924	4.85e-11	1.25e-09
TP53	HSPA9	14	33	176	3924	4.85e-11	1.25e-09
TP53	MAGEA2	14	33	199	3924	2.43e-10	6.21e-09
TP53	CSE1L	14	33	176	3924	4.85e-11	1.25e-09
TP53	PRKCD	14	33	199	3924	2.43e-10	6.21e-09
TP53	CUL4A	14	33	176	3924	4.85e-11	1.25e-09
TP53	KDM4D	14	33	176	3924	4.85e-11	1.25e-09
TP53	CARM1	14	33	176	3924	4.85e-11	1.25e-09
TP53	VRK2	14	33	176	3924	4.85e-11	1.25e-09
TP53	MAGEC2	14	33	176	3924	4.85e-11	1.25e-09
TP53	CDC14A	14	33	199	3924	2.43e-10	6.21e-09
TP53	TP53BP1	12	33	53	3924	8.77e-15	2.09e-12
TP53	CHEK2	11	33	162	3924	4.93e-08	1.2e-06
TP53	HSP90AB1	11	33	162	3924	4.93e-08	1.2e-06
TP53	ANXA7	11	33	162	3924	4.93e-08	1.2e-06
TP53	CDC42	11	33	162	3924	4.93e-08	1.2e-06
TP53	UBA52	11	33	162	3924	4.93e-08	1.2e-06
TP53	UBE2I	11	33	162	3924	4.93e-08	1.2e-06
TP53	CSNK2B	11	33	162	3924	4.93e-08	1.2e-06
TP53	COX17	11	33	162	3924	4.93e-08	1.2e-06
TP53	GUSBP1	11	33	162	3924	4.93e-08	1.2e-06
TP53	PIAS4	11	33	162	3924	4.93e-08	1.2e-06
TP53	MAGEB18	11	33	162	3924	4.93e-08	1.2e-06
TP53	TPT1	10	33	112	3924	1.82e-08	4.6e-07
TP53	NQO1	10	33	125	3924	5.08e-08	1.24e-06
TP53	RPS3	10	33	108	3924	1.29e-08	3.28e-07
TP53	STAT1	10	33	116	3924	2.53e-08	6.35e-07
TP53	CRK	10	33	116	3924	2.53e-08	6.35e-07
TP53	TP53BP2	10	33	17	3924	7.77e-16	3.51e-13
TP53	BAK1	10	33	111	3924	1.67e-08	4.24e-07
TP53	COPS5	10	33	102	3924	7.53e-09	1.92e-07
EGFR	AIP	9	10	475	12961	1.15e-12	5.47e-11
EGFR	SOCS3	9	10	475	12961	1.15e-12	5.47e-11
EGFR	PSMA7	9	10	475	12961	1.15e-12	5.47e-11
EGFR	AURKA	9	10	475	12961	1.15e-12	5.47e-11
EGFR	RGS16	9	10	475	12961	1.15e-12	5.47e-11
EGFR	ARPC5	9	10	475	12961	1.15e-12	5.47e-11
EGFR	ACTN4	9	10	475	12961	1.15e-12	5.47e-11
EGFR	TLR2	9	10	475	12961	1.15e-12	5.47e-11
EGFR	CTNND1	9	10	475	12961	1.15e-12	5.47e-11
EGFR	SH2D1A	9	10	475	12961	1.15e-12	5.47e-11
EGFR	ZPR1	9	10	475	12961	1.15e-12	5.47e-11
EGFR	SH3BGRL	9	10	475	12961	1.15e-12	5.47e-11
EGFR	ALDOA	9	10	475	12961	1.15e-12	5.47e-11
EGFR	ANXA1	9	10	475	12961	1.15e-12	5.47e-11
EGFR	GAPDH	9	10	475	12961	1.15e-12	5.47e-11
EGFR	ITGB2	9	10	475	12961	1.15e-12	5.47e-11
EGFR	PRKCB	9	10	478	12961	1.22e-12	5.47e-11
EGFR	UROD	9	10	475	12961	1.15e-12	5.47e-11
EGFR	GSN	9	10	475	12961	1.15e-12	5.47e-11
EGFR	CDK1	9	10	475	12961	1.15e-12	5.47e-11
EGFR	DCN	9	10	475	12961	1.15e-12	5.47e-11
EGFR	HSP90AA1	9	10	475	12961	1.15e-12	5.47e-11
EGFR	HSP90AB1	9	10	475	12961	1.15e-12	5.47e-11
EGFR	FGR	9	10	475	12961	1.15e-12	5.47e-11
EGFR	UCHL1	9	10	475	12961	1.15e-12	5.47e-11
EGFR	TXN	9	10	475	12961	1.15e-12	5.47e-11
EGFR	HSPA8	9	10	475	12961	1.15e-12	5.47e-11
EGFR	PIM1	9	10	475	12961	1.15e-12	5.47e-11
EGFR	PCNA	9	10	475	12961	1.15e-12	5.47e-11
EGFR	CDH1	9	10	475	12961	1.15e-12	5.47e-11
EGFR	CD59	9	10	475	12961	1.15e-12	5.47e-11
EGFR	PKM	9	10	475	12961	1.15e-12	5.47e-11
EGFR	JUP	9	10	475	12961	1.15e-12	5.47e-11
EGFR	EZR	9	10	475	12961	1.15e-12	5.47e-11
EGFR	VAV1	9	10	475	12961	1.15e-12	5.47e-11
EGFR	CBR1	9	10	475	12961	1.15e-12	5.47e-11
EGFR	FAH	9	10	475	12961	1.15e-12	5.47e-11
EGFR	GOT1	9	10	475	12961	1.15e-12	5.47e-11
EGFR	PRKCA	9	10	475	12961	1.15e-12	5.47e-11
EGFR	PRKACA	9	10	475	12961	1.15e-12	5.47e-11
EGFR	PTPN1	9	10	475	12961	1.15e-12	5.47e-11
EGFR	ARF4	9	10	475	12961	1.15e-12	5.47e-11
EGFR	RAB3A	9	10	475	12961	1.15e-12	5.47e-11
EGFR	CSRP1	9	10	478	12961	1.22e-12	5.47e-11
EGFR	CFL1	9	10	475	12961	1.15e-12	5.47e-11
EGFR	S100A4	9	10	475	12961	1.15e-12	5.47e-11
EGFR	YWHAQ	9	10	475	12961	1.15e-12	5.47e-11
EGFR	PTPN6	9	10	475	12961	1.15e-12	5.47e-11
EGFR	CASP1	9	10	475	12961	1.15e-12	5.47e-11
EGFR	PRKAR1B	9	10	475	12961	1.15e-12	5.47e-11
EGFR	AKT1	9	10	475	12961	1.15e-12	5.47e-11
EGFR	ATIC	9	10	475	12961	1.15e-12	5.47e-11
EGFR	YWHAB	9	10	475	12961	1.15e-12	5.47e-11
EGFR	SFN	9	10	475	12961	1.15e-12	5.47e-11
EGFR	ARRB2	9	10	475	12961	1.15e-12	5.47e-11
EGFR	HSPA4	9	10	475	12961	1.15e-12	5.47e-11
EGFR	ATP5F1C	9	10	475	12961	1.15e-12	5.47e-11
EGFR	PPARG	9	10	475	12961	1.15e-12	5.47e-11
EGFR	SNCA	9	10	475	12961	1.15e-12	5.47e-11
EGFR	HSPA9	9	10	475	12961	1.15e-12	5.47e-11
EGFR	STAT3	9	10	475	12961	1.15e-12	5.47e-11
EGFR	STAT1	9	10	475	12961	1.15e-12	5.47e-11
EGFR	STAT5A	9	10	475	12961	1.15e-12	5.47e-11
EGFR	CASP3	9	10	475	12961	1.15e-12	5.47e-11
EGFR	MAPK8	9	10	475	12961	1.15e-12	5.47e-11
EGFR	MAPK9	9	10	475	12961	1.15e-12	5.47e-11
EGFR	CRK	9	10	475	12961	1.15e-12	5.47e-11
EGFR	CRKL	9	10	475	12961	1.15e-12	5.47e-11
EGFR	ARRB1	9	10	475	12961	1.15e-12	5.47e-11
EGFR	RGS4	9	10	475	12961	1.15e-12	5.47e-11
EGFR	DUSP3	9	10	475	12961	1.15e-12	5.47e-11
EGFR	STAT5B	9	10	475	12961	1.15e-12	5.47e-11
EGFR	RAP1GDS1	9	10	475	12961	1.15e-12	5.47e-11
EGFR	STAT2	9	10	475	12961	1.15e-12	5.47e-11
EGFR	VAV2	9	10	475	12961	1.15e-12	5.47e-11
EGFR	PPP5C	9	10	475	12961	1.15e-12	5.47e-11
EGFR	OAZ1	9	10	475	12961	1.15e-12	5.47e-11
EGFR	PSMD4	9	10	475	12961	1.15e-12	5.47e-11
EGFR	CASP7	9	10	475	12961	1.15e-12	5.47e-11
EGFR	TPI1	9	10	475	12961	1.15e-12	5.47e-11
EGFR	GABARAPL2	9	10	475	12961	1.15e-12	5.47e-11
EGFR	CALM1	9	10	475	12961	1.15e-12	5.47e-11
EGFR	ARF6	9	10	475	12961	1.15e-12	5.47e-11
EGFR	PPP2CB	9	10	475	12961	1.15e-12	5.47e-11
EGFR	GRB2	9	10	475	12961	1.15e-12	5.47e-11
EGFR	YWHAZ	9	10	475	12961	1.15e-12	5.47e-11
EGFR	FKBP4	9	10	475	12961	1.15e-12	5.47e-11
EGFR	PRKCZ	9	10	475	12961	1.15e-12	5.47e-11
EGFR	PTPN11	9	10	475	12961	1.15e-12	5.47e-11
EGFR	PRDX1	9	10	475	12961	1.15e-12	5.47e-11
EGFR	SOS2	9	10	475	12961	1.15e-12	5.47e-11
EGFR	PAK1	9	10	475	12961	1.15e-12	5.47e-11
EGFR	SLA	9	10	475	12961	1.15e-12	5.47e-11
EGFR	FKBP5	9	10	475	12961	1.15e-12	5.47e-11
EGFR	DYNC1H1	9	10	475	12961	1.15e-12	5.47e-11
EGFR	PDK3	9	10	475	12961	1.15e-12	5.47e-11
EGFR	TAB1	9	10	475	12961	1.15e-12	5.47e-11
EGFR	ADRM1	9	10	475	12961	1.15e-12	5.47e-11
EGFR	MAPK14	9	10	475	12961	1.15e-12	5.47e-11
EGFR	CDC37	9	10	475	12961	1.15e-12	5.47e-11
EGFR	MAPKAPK3	9	10	475	12961	1.15e-12	5.47e-11
EGFR	TUBA1A	9	10	475	12961	1.15e-12	5.47e-11
EGFR	PDCD6IP	9	10	475	12961	1.15e-12	5.47e-11
EGFR	PIK3R3	9	10	475	12961	1.15e-12	5.47e-11
EGFR	AP2M1	9	10	475	12961	1.15e-12	5.47e-11
EGFR	CYTH2	9	10	475	12961	1.15e-12	5.47e-11
EGFR	OLFM1	9	10	475	12961	1.15e-12	5.47e-11
EGFR	PTPN18	9	10	475	12961	1.15e-12	5.47e-11
EGFR	SH3GL2	9	10	475	12961	1.15e-12	5.47e-11
EGFR	SH3GL3	9	10	475	12961	1.15e-12	5.47e-11
EGFR	SH2D3A	9	10	475	12961	1.15e-12	5.47e-11
EGFR	VPS33B	9	10	478	12961	1.22e-12	5.47e-11
EGFR	SH3BGRL3	9	10	475	12961	1.15e-12	5.47e-11
EGFR	SLA2	9	10	475	12961	1.15e-12	5.47e-11
EGFR	NANS	9	10	478	12961	1.22e-12	5.47e-11
EGFR	CISH	9	10	475	12961	1.15e-12	5.47e-11
EGFR	VAPA	9	10	475	12961	1.15e-12	5.47e-11
EGFR	APPL1	9	10	475	12961	1.15e-12	5.47e-11
EGFR	AGO2	9	10	475	12961	1.15e-12	5.47e-11
EGFR	VAV3	9	10	475	12961	1.15e-12	5.47e-11
EGFR	EXOC7	9	10	475	12961	1.15e-12	5.47e-11
EGFR	CAMK2A	9	10	475	12961	1.15e-12	5.47e-11
EGFR	PIN4	9	10	475	12961	1.15e-12	5.47e-11
EGFR	MOB4	9	10	475	12961	1.15e-12	5.47e-11
EGFR	SNX9	9	10	475	12961	1.15e-12	5.47e-11
EGFR	HEL-S-162eP	9	10	475	12961	1.15e-12	5.47e-11
EGFR	HEL-S-72p	9	10	475	12961	1.15e-12	5.47e-11
EGFR	HEL-117	9	10	475	12961	1.15e-12	5.47e-11
EGFR	HEL-S-1	9	10	475	12961	1.15e-12	5.47e-11
EGFR	HEL-S-32	9	10	475	12961	1.15e-12	5.47e-11
EGFR	HEL-S-70p	9	10	475	12961	1.15e-12	5.47e-11
EGFR	HEL-S-15	9	10	475	12961	1.15e-12	5.47e-11
EGFR	HEL-S-49	9	10	475	12961	1.15e-12	5.47e-11
EGFR	HEL-S-87p	9	10	475	12961	1.15e-12	5.47e-11
EGFR	HEL-S-125m	9	10	475	12961	1.15e-12	5.47e-11
TP53	CABL1	9	33	130	3924	8.99e-07	2.12e-05
TP53	SUMO1	9	33	104	3924	1.4e-07	3.37e-06
TP53	NTHL1	9	33	110	3924	2.24e-07	5.38e-06
TP53	BCL2L1	9	33	24	3924	4.06e-13	4.72e-11
TP53	TWIST1	9	33	122	3924	5.31e-07	1.27e-05
TP53	MAPK11	9	33	101	3924	1.09e-07	2.64e-06
TP53	MAPK14	9	33	104	3924	1.4e-07	3.37e-06
TP53	FBXO42	9	33	127	3924	7.41e-07	1.77e-05
EGFR	SH3D21	8	10	280	12961	2.05e-12	5.47e-11
EGFR	CALM3	8	10	280	12961	2.05e-12	5.47e-11
EGFR	RUTBC1	8	10	280	12961	2.05e-12	5.47e-11
EGFR	APBB1	8	10	280	12961	2.05e-12	5.47e-11
EGFR	WASL	8	10	280	12961	2.05e-12	5.47e-11
EGFR	PIK3R2	8	10	280	12961	2.05e-12	5.47e-11
EGFR	PIK3C2B	8	10	280	12961	2.05e-12	5.47e-11
EGFR	SOCS6	8	10	280	12961	2.05e-12	5.47e-11
EGFR	IRS4	8	10	280	12961	2.05e-12	5.47e-11
EGFR	SCAMP3	8	10	280	12961	2.05e-12	5.47e-11
EGFR	PLD2	8	10	280	12961	2.05e-12	5.47e-11
EGFR	DEGS1	8	10	280	12961	2.05e-12	5.47e-11
EGFR	SCAMP1	8	10	280	12961	2.05e-12	5.47e-11
EGFR	PLSCR1	8	10	280	12961	2.05e-12	5.47e-11
EGFR	SGSM2	8	10	280	12961	2.05e-12	5.47e-11
EGFR	LAT	8	10	280	12961	2.05e-12	5.47e-11
EGFR	NCK2	8	10	280	12961	2.05e-12	5.47e-11
EGFR	CALU	8	10	280	12961	2.05e-12	5.47e-11
EGFR	MEGF6	8	10	280	12961	2.05e-12	5.47e-11
EGFR	DNAJC13	8	10	280	12961	2.05e-12	5.47e-11
EGFR	FRAT2	8	10	280	12961	2.05e-12	5.47e-11
EGFR	TOM1L1	8	10	280	12961	2.05e-12	5.47e-11
EGFR	GRAP2	8	10	280	12961	2.05e-12	5.47e-11
EGFR	STAM2	8	10	280	12961	2.05e-12	5.47e-11
EGFR	SORBS2	8	10	280	12961	2.05e-12	5.47e-11
EGFR	HEXIM1	8	10	280	12961	2.05e-12	5.47e-11
EGFR	AHSA1	8	10	280	12961	2.05e-12	5.47e-11
EGFR	APBB3	8	10	280	12961	2.05e-12	5.47e-11
EGFR	APBA3	8	10	280	12961	2.05e-12	5.47e-11
EGFR	TGFB1	8	10	280	12961	2.05e-12	5.47e-11
EGFR	FN1	8	10	280	12961	2.05e-12	5.47e-11
EGFR	NR3C1	8	10	280	12961	2.05e-12	5.47e-11
EGFR	APP	8	10	280	12961	2.05e-12	5.47e-11
EGFR	ITGB1	8	10	280	12961	2.05e-12	5.47e-11
EGFR	PTPRC	8	10	280	12961	2.05e-12	5.47e-11
EGFR	TPM1	8	10	280	12961	2.05e-12	5.47e-11
EGFR	HSPA1A	8	10	280	12961	2.05e-12	5.47e-11
EGFR	AR	8	10	280	12961	2.05e-12	5.47e-11
EGFR	MAPT	8	10	280	12961	2.05e-12	5.47e-11
EGFR	LAMP1	8	10	280	12961	2.05e-12	5.47e-11
EGFR	HSP90B1	8	10	280	12961	2.05e-12	5.47e-11
EGFR	AREG	8	10	280	12961	2.05e-12	5.47e-11
EGFR	MUC1	8	10	280	12961	2.05e-12	5.47e-11
EGFR	CD44	8	10	280	12961	2.05e-12	5.47e-11
EGFR	NCK1	8	10	280	12961	2.05e-12	5.47e-11
EGFR	PLCG2	8	10	280	12961	2.05e-12	5.47e-11
EGFR	SYN1	8	10	280	12961	2.05e-12	5.47e-11
EGFR	PLCG1	8	10	280	12961	2.05e-12	5.47e-11
EGFR	TNFRSF1A	8	10	280	12961	2.05e-12	5.47e-11
EGFR	RASA1	8	10	280	12961	2.05e-12	5.47e-11
EGFR	PTPRB	8	10	280	12961	2.05e-12	5.47e-11
EGFR	EEF1G	8	10	280	12961	2.05e-12	5.47e-11
EGFR	PIK3R1	8	10	280	12961	2.05e-12	5.47e-11
EGFR	SHC1	8	10	280	12961	2.05e-12	5.47e-11
EGFR	CDC25A	8	10	280	12961	2.05e-12	5.47e-11
EGFR	CDC25C	8	10	280	12961	2.05e-12	5.47e-11
EGFR	STIP1	8	10	280	12961	2.05e-12	5.47e-11
EGFR	MPV17	8	10	280	12961	2.05e-12	5.47e-11
EGFR	USP8	8	10	280	12961	2.05e-12	5.47e-11
EGFR	MDH1	8	10	280	12961	2.05e-12	5.47e-11
EGFR	EPS15	8	10	280	12961	2.05e-12	5.47e-11
EGFR	MATR3	8	10	280	12961	2.05e-12	5.47e-11
EGFR	NEDD4	8	10	280	12961	2.05e-12	5.47e-11
EGFR	CAMLG	8	10	280	12961	2.05e-12	5.47e-11
EGFR	NUMB	8	10	280	12961	2.05e-12	5.47e-11
EGFR	SELENOP	8	10	280	12961	2.05e-12	5.47e-11
EGFR	EMD	8	10	280	12961	2.05e-12	5.47e-11
EGFR	CAV2	8	10	280	12961	2.05e-12	5.47e-11
EGFR	STX17	8	10	280	12961	2.05e-12	5.47e-11
EGFR	SEC61B	8	10	280	12961	2.05e-12	5.47e-11
EGFR	SNAP25	8	10	280	12961	2.05e-12	5.47e-11
EGFR	ACTA1	8	10	280	12961	2.05e-12	5.47e-11
EGFR	c-fgr	8	10	280	12961	2.05e-12	5.47e-11
EGFR	FANCC	8	10	280	12961	2.05e-12	5.47e-11
EGFR	PRKCE	8	10	280	12961	2.05e-12	5.47e-11
EGFR	CNTN2	8	10	280	12961	2.05e-12	5.47e-11
EGFR	AKAP12	8	10	280	12961	2.05e-12	5.47e-11
EGFR	CAV1	8	10	280	12961	2.05e-12	5.47e-11
EGFR	PTPN12	8	10	280	12961	2.05e-12	5.47e-11
EGFR	PRKCD	8	10	280	12961	2.05e-12	5.47e-11
EGFR	LRP1	8	10	280	12961	2.05e-12	5.47e-11
EGFR	AHNAK	8	10	280	12961	2.05e-12	5.47e-11
EGFR	MAP3K12	8	10	280	12961	2.05e-12	5.47e-11
EGFR	PTPRJ	8	10	280	12961	2.05e-12	5.47e-11
EGFR	EPS8	8	10	280	12961	2.05e-12	5.47e-11
EGFR	TRAF2	8	10	280	12961	2.05e-12	5.47e-11
EGFR	LCP2	8	10	280	12961	2.05e-12	5.47e-11
EGFR	GRB10	8	10	280	12961	2.05e-12	5.47e-11
EGFR	MAPK8IP2	8	10	280	12961	2.05e-12	5.47e-11
EGFR	GAB1	8	10	280	12961	2.05e-12	5.47e-11
EGFR	GPM6B	8	10	280	12961	2.05e-12	5.47e-11
EGFR	PICALM	8	10	280	12961	2.05e-12	5.47e-11
EGFR	DCTN2	8	10	280	12961	2.05e-12	5.47e-11
EGFR	SNX1	8	10	280	12961	2.05e-12	5.47e-11
EGFR	RIN1	8	10	280	12961	2.05e-12	5.47e-11
EGFR	RAPGEF1	8	10	280	12961	2.05e-12	5.47e-11
EGFR	COL9A3	8	10	280	12961	2.05e-12	5.47e-11
EGFR	CYLC2	8	10	280	12961	2.05e-12	5.47e-11
EGFR	KEAP1	8	10	280	12961	2.05e-12	5.47e-11
EGFR	ARHGEF7	8	10	280	12961	2.05e-12	5.47e-11
EGFR	CTTN	8	10	280	12961	2.05e-12	5.47e-11
EGFR	FKBP8	8	10	280	12961	2.05e-12	5.47e-11
EGFR	GRB14	8	10	280	12961	2.05e-12	5.47e-11
EGFR	GRB7	8	10	280	12961	2.05e-12	5.47e-11
EGFR	BECN1	8	10	280	12961	2.05e-12	5.47e-11
EGFR	SPARCL1	8	10	280	12961	2.05e-12	5.47e-11
EGFR	SPCS2	8	10	280	12961	2.05e-12	5.47e-11
EGFR	EEA1	8	10	280	12961	2.05e-12	5.47e-11
EGFR	PRKD1	8	10	280	12961	2.05e-12	5.47e-11
EGFR	LRRK1	8	10	280	12961	2.05e-12	5.47e-11
EGFR	PLCH1	8	10	280	12961	2.05e-12	5.47e-11
EGFR	DKFZp686J1568	8	10	280	12961	2.05e-12	5.47e-11
EGFR	TSTD2	8	10	280	12961	2.05e-12	5.47e-11
EGFR	TNS3	8	10	280	12961	2.05e-12	5.47e-11
EGFR	DOK6	8	10	280	12961	2.05e-12	5.47e-11
EGFR	SHC4	8	10	280	12961	2.05e-12	5.47e-11
EGFR	TMCO3	8	10	280	12961	2.05e-12	5.47e-11
EGFR	KCTD9	8	10	280	12961	2.05e-12	5.47e-11
EGFR	CLNK	8	10	280	12961	2.05e-12	5.47e-11
EGFR	LAPTM4B	8	10	280	12961	2.05e-12	5.47e-11
EGFR	NUDCD3	8	10	280	12961	2.05e-12	5.47e-11
EGFR	CMTM8	8	10	280	12961	2.05e-12	5.47e-11
EGFR	TNS4	8	10	280	12961	2.05e-12	5.47e-11
EGFR	RUSC2	8	10	280	12961	2.05e-12	5.47e-11
EGFR	SH2D3C	8	10	280	12961	2.05e-12	5.47e-11
EGFR	AOPEP	8	10	280	12961	2.05e-12	5.47e-11
EGFR	FBXO25	8	10	280	12961	2.05e-12	5.47e-11
EGFR	MGARP	8	10	280	12961	2.05e-12	5.47e-11
EGFR	CHD5	8	10	280	12961	2.05e-12	5.47e-11
EGFR	DOK4	8	10	280	12961	2.05e-12	5.47e-11
EGFR	FRS2	8	10	280	12961	2.05e-12	5.47e-11
EGFR	HDAC7	8	10	280	12961	2.05e-12	5.47e-11
EGFR	RIN2	8	10	280	12961	2.05e-12	5.47e-11
EGFR	SHC3	8	10	280	12961	2.05e-12	5.47e-11
EGFR	PTPRU	8	10	280	12961	2.05e-12	5.47e-11
EGFR	PRCC	8	10	280	12961	2.05e-12	5.47e-11
EGFR	APBB2	8	10	280	12961	2.05e-12	5.47e-11
EGFR	MAP4K1	8	10	280	12961	2.05e-12	5.47e-11
EGFR	PNPLA2	8	10	280	12961	2.05e-12	5.47e-11
EGFR	DCBLD2	8	10	280	12961	2.05e-12	5.47e-11
EGFR	SYNGAP1	8	10	280	12961	2.05e-12	5.47e-11
EGFR	PIGS	8	10	280	12961	2.05e-12	5.47e-11
EGFR	NIBAN2	8	10	280	12961	2.05e-12	5.47e-11
EGFR	NDN	8	10	280	12961	2.05e-12	5.47e-11
EGFR	DOK1	8	10	280	12961	2.05e-12	5.47e-11
EGFR	MAP3K3	8	10	280	12961	2.05e-12	5.47e-11
EGFR	TRMO	8	10	280	12961	2.05e-12	5.47e-11
EGFR	RNF126	8	10	280	12961	2.05e-12	5.47e-11
EGFR	HEMGN	8	10	280	12961	2.05e-12	5.47e-11
EGFR	DNAJC4	8	10	280	12961	2.05e-12	5.47e-11
EGFR	SH2D2A	8	10	280	12961	2.05e-12	5.47e-11
EGFR	SH2B1	8	10	280	12961	2.05e-12	5.47e-11
EGFR	ITSN2	8	10	280	12961	2.05e-12	5.47e-11
EGFR	DOK5	8	10	280	12961	2.05e-12	5.47e-11
EGFR	HDAC6	8	10	280	12961	2.05e-12	5.47e-11
EGFR	DKFZp434N101	8	10	280	12961	2.05e-12	5.47e-11
EGFR	STAP2	8	10	280	12961	2.05e-12	5.47e-11
EGFR	RABGEF1	8	10	280	12961	2.05e-12	5.47e-11
EGFR	STUB1	8	10	280	12961	2.05e-12	5.47e-11
EGFR	WASF3	8	10	280	12961	2.05e-12	5.47e-11
EGFR	BAIAP2	8	10	280	12961	2.05e-12	5.47e-11
EGFR	MAPK8IP1	8	10	280	12961	2.05e-12	5.47e-11
EGFR	SH2B3	8	10	280	12961	2.05e-12	5.47e-11
EGFR	ZNF510	8	10	280	12961	2.05e-12	5.47e-11
EGFR	MAST1	8	10	280	12961	2.05e-12	5.47e-11
EGFR	PTPN22	8	10	280	12961	2.05e-12	5.47e-11
EGFR	TLN1	8	10	280	12961	2.05e-12	5.47e-11
EGFR	CTG3a	8	10	280	12961	2.05e-12	5.47e-11
EGFR	RNF115	8	10	280	12961	2.05e-12	5.47e-11
EGFR	IKBKG	8	10	280	12961	2.05e-12	5.47e-11
EGFR	NUMBL	8	10	280	12961	2.05e-12	5.47e-11
EGFR	CAPN7	8	10	280	12961	2.05e-12	5.47e-11
EGFR	HEL-S-77	8	10	280	12961	2.05e-12	5.47e-11
EGFR	HEL-S-94n	8	10	280	12961	2.05e-12	5.47e-11
EGFR	HEL-S-22	8	10	280	12961	2.05e-12	5.47e-11
TP53	HSPA1B	8	33	115	3924	3.92e-06	8.34e-05
TP53	NR1i1	8	33	126	3924	7.63e-06	0.000154775
TP53	CHEK1	8	33	108	3924	2.47e-06	5.39e-05
TP53	IKBKB	8	33	111	3924	3.02e-06	6.53e-05
TP53	AURKA	8	33	107	3924	2.3e-06	5.06e-05
TP53	SCAMP1	8	33	106	3924	2.15e-06	4.77e-05
TP53	PRKAB2	8	33	106	3924	2.15e-06	4.77e-05
TP53	NUAK1	8	33	130	3924	9.58e-06	0.000192018
TP53	ARIH2	8	33	104	3924	1.87e-06	4.21e-05
TP53	BAG2	8	33	124	3924	6.79e-06	0.000138284
TP53	PTTG1	8	33	128	3924	8.56e-06	0.00017256
TP53	PNP	8	33	100	3924	1.4e-06	3.21e-05
TP53	TK1	8	33	94	3924	8.81e-07	2.08e-05
TP53	HSPB1	8	33	106	3924	2.15e-06	4.77e-05
TP53	TFAP2A	8	33	118	3924	4.73e-06	9.85e-05
TP53	CDK1	8	33	104	3924	1.87e-06	4.21e-05
TP53	NPM1	8	33	98	3924	1.2e-06	2.81e-05
TP53	BCL2	8	33	108	3924	2.47e-06	5.39e-05
TP53	CEBPB	8	33	118	3924	4.73e-06	9.85e-05
TP53	ATF3	8	33	102	3924	1.62e-06	3.68e-05
TP53	ERCC3	8	33	116	3924	4.17e-06	8.81e-05
TP53	EIF2S2	8	33	96	3924	1.03e-06	2.42e-05
TP53	TBP	8	33	107	3924	2.3e-06	5.06e-05
TP53	SAT1	8	33	97	3924	1.11e-06	2.61e-05
TP53	S100A1	8	33	100	3924	1.4e-06	3.21e-05
TP53	CDK2	8	33	108	3924	2.47e-06	5.39e-05
TP53	YY1	8	33	117	3924	4.44e-06	9.33e-05
TP53	APEX1	8	33	84	3924	3.79e-07	9.1e-06
TP53	MSX1	8	33	119	3924	5.03e-06	0.000104385
TP53	S100A2	8	33	110	3924	2.82e-06	6.13e-05
TP53	RRM2	8	33	114	3924	3.67e-06	7.88e-05
TP53	PHB1	8	33	114	3924	3.67e-06	7.88e-05
TP53	PPP1CC	8	33	93	3924	8.13e-07	1.93e-05
TP53	CDKN1A	8	33	99	3924	1.3e-06	3.01e-05
TP53	STAT6	8	33	113	3924	3.44e-06	7.43e-05
TP53	MAPK8	8	33	95	3924	9.53e-07	2.24e-05
TP53	UBE2A	8	33	106	3924	2.15e-06	4.77e-05
TP53	TAF6	8	33	120	3924	5.35e-06	0.000110117
TP53	SULT1E1	8	33	106	3924	2.15e-06	4.77e-05
TP53	MRE11	8	33	115	3924	3.92e-06	8.34e-05
TP53	CDK7	8	33	103	3924	1.74e-06	3.94e-05
TP53	CCL18	8	33	111	3924	3.02e-06	6.53e-05
TP53	UBE2K	8	33	101	3924	1.5e-06	3.45e-05
TP53	UBE2N	8	33	107	3924	2.3e-06	5.06e-05
TP53	TMSB4X	8	33	100	3924	1.4e-06	3.21e-05
TP53	SNRPN	8	33	99	3924	1.3e-06	3.01e-05
TP53	E2F1	8	33	129	3924	9.06e-06	0.000182243
TP53	RAD51	8	33	109	3924	2.64e-06	5.75e-05
TP53	SRSF1	8	33	116	3924	4.17e-06	8.81e-05
TP53	GPS1	8	33	109	3924	2.64e-06	5.75e-05
TP53	STX5	8	33	93	3924	8.13e-07	1.93e-05
TP53	GPS2	8	33	118	3924	4.73e-06	9.85e-05
TP53	MAD2L1BP	8	33	103	3924	1.74e-06	3.94e-05
TP53	PPA1	8	33	101	3924	1.5e-06	3.45e-05
TP53	SAFB	8	33	125	3924	7.2e-06	0.000146334
TP53	NR0B2	8	33	119	3924	5.03e-06	0.000104385
TP53	TAF9	8	33	100	3924	1.4e-06	3.21e-05
TP53	UFD1L	8	33	115	3924	3.92e-06	8.34e-05
TP53	E4F1	8	33	130	3924	9.58e-06	0.000192018
TP53	JMJD6	8	33	105	3924	2e-06	4.5e-05
TP53	ZMIZ2	8	33	121	3924	5.68e-06	0.000116551
TP53	COP1	8	33	120	3924	5.35e-06	0.000110117
TP53	ING5	8	33	117	3924	4.44e-06	9.33e-05
TP53	TFAP2C	8	33	123	3924	6.4e-06	0.000130609
TP53	KAT5	8	33	102	3924	1.62e-06	3.68e-05
TP53	EAF2	8	33	118	3924	4.73e-06	9.85e-05
TP53	TOE1	8	33	115	3924	3.92e-06	8.34e-05
TP53	PBK	8	33	105	3924	2e-06	4.5e-05
TP53	RCHY1	8	33	99	3924	1.3e-06	3.01e-05
TP53	MPHOSPH6	8	33	94	3924	8.81e-07	2.08e-05
TP53	NDN	8	33	122	3924	6.03e-06	0.000123295
TP53	BAG1	8	33	120	3924	5.35e-06	0.000110117
TP53	ANTKMT	8	33	93	3924	8.13e-07	1.93e-05
TP53	HDAC8	8	33	107	3924	2.3e-06	5.06e-05
TP53	FXYD6	8	33	107	3924	2.3e-06	5.06e-05
TP53	BRD7	8	33	117	3924	4.44e-06	9.33e-05
TP53	KMT5A	8	33	116	3924	4.17e-06	8.81e-05
TP53	BABAM2	8	33	121	3924	5.68e-06	0.000116551
TP53	WWOX	8	33	122	3924	6.03e-06	0.000123295
TP53	ING1	8	33	120	3924	5.35e-06	0.000110117
TP53	STUB1	8	33	104	3924	1.87e-06	4.21e-05
TP53	ING4	8	33	114	3924	3.67e-06	7.88e-05
TP53	UBE2J1	8	33	116	3924	4.17e-06	8.81e-05
TP53	L3MBTL1	8	33	127	3924	8.08e-06	0.00016362
TP53	TRIM27	7	33	106	3924	2.42e-05	0.000479699
TP53	GPX2	7	33	101	3924	1.77e-05	0.000354208
TP53	UBE2D3	7	33	109	3924	2.88e-05	0.000569829
TP53	UBE2D2	7	33	105	3924	2.27e-05	0.000452388
TP53	DUSP26	7	33	103	3924	2.01e-05	0.000400828
TP53	APPL1	7	33	90	3924	8.44e-06	0.000170464
TP53	PSMD11	6	33	81	3924	5.3e-05	0.00102323
TP53	KDM1A	6	33	99	3924	0.000158875	0.00277451
TP53	APOH	6	33	104	3924	0.000207262	0.00277451
TP53	S100B	6	33	94	3924	0.000119931	0.00217255
TP53	S100A8	6	33	97	3924	0.000142247	0.00253816
TP53	S100A6	6	33	104	3924	0.000207262	0.00277451
TP53	HSP90AA1	6	33	86	3924	7.38e-05	0.00140509
TP53	TXN	6	33	110	3924	0.000280002	0.00277451
TP53	VDR	6	33	103	3924	0.000196756	0.00277451
TP53	ANXA3	6	33	87	3924	7.86e-05	0.00148914
TP53	RCC1	6	33	79	3924	4.62e-05	0.000907572
TP53	RAB4A	6	33	92	3924	0.000106673	0.00195221
TP53	GADD45A	6	33	95	3924	0.000127034	0.00228393
TP53	NFKBIA	6	33	104	3924	0.000207262	0.00277451
TP53	MAPK1	6	33	93	3924	0.000113147	0.00206012
TP53	ARL3	6	33	100	3924	0.000167749	0.00277451
TP53	CDKN2C	6	33	106	3924	0.000229607	0.00277451
TP53	MAPK9	6	33	97	3924	0.000142247	0.00253816
TP53	BRCC3	6	33	95	3924	0.000127034	0.00228393
TP53	RPS10	6	33	97	3924	0.000142247	0.00253816
TP53	GSK3B	6	33	91	3924	0.000100499	0.00184869
TP53	SERPINB9	6	33	93	3924	0.000113147	0.00206012
TP53	UBE2D1	6	33	103	3924	0.000196756	0.00277451
TP53	RAP1B	6	33	92	3924	0.000106673	0.00195221
TP53	PPP1CA	6	33	90	3924	9.46e-05	0.00176246
TP53	YWHAE	6	33	98	3924	0.000150378	0.0026699
TP53	CSNK2A1	6	33	72	3924	2.76e-05	0.000546221
TP53	ERH	6	33	98	3924	0.000150378	0.0026699
TP53	GSTM4	6	33	89	3924	8.9e-05	0.00167174
TP53	AIMP2	6	33	100	3924	0.000167749	0.00277451
TP53	PIN1	6	33	95	3924	0.000127034	0.00228393
TP53	HDAC1	6	33	96	3924	0.000134469	0.00241144
TP53	TDG	6	33	100	3924	0.000167749	0.00277451
TP53	PAFAH1B3	6	33	98	3924	0.000150378	0.0026699
TP53	SMN1	6	33	91	3924	0.000100499	0.00184869
TP53	RRM2B	6	33	105	3924	0.000218208	0.00277451
TP53	MAPKAPK5	6	33	82	3924	5.68e-05	0.00108899
TP53	UFD1	6	33	89	3924	8.9e-05	0.00167174
TP53	VRK1	6	33	87	3924	7.86e-05	0.00148914
EGFR	EGFR	5	10	301	12961	1.54e-06	3.53e-05
EGFR	PTGDS	5	10	163	12961	7.52e-08	1.83e-06
TP53	CDKN2A	5	33	91	3924	0.000925777	0.00760658
EGFR	ITK	4	10	46	12961	3.28e-08	8.21e-07
PFAS	ZNF593	3	4	233	6471	0.000181687	0.00277451
PFAS	SGTA	3	4	233	6471	0.000181687	0.00277451
PFAS	SERPINC1	3	4	233	6471	0.000181687	0.00277451
PFAS	LDHB	3	4	233	6471	0.000181687	0.00277451
PFAS	CAPN1	3	4	233	6471	0.000181687	0.00277451
PFAS	PC	3	4	233	6471	0.000181687	0.00277451
PFAS	EEF2	3	4	233	6471	0.000181687	0.00277451
PFAS	PAICS	3	4	233	6471	0.000181687	0.00277451
PFAS	WARS1	3	4	233	6471	0.000181687	0.00277451
PFAS	ECHS1	3	4	233	6471	0.000181687	0.00277451
PFAS	ADSL	3	4	233	6471	0.000181687	0.00277451
PFAS	HSPA9	3	4	233	6471	0.000181687	0.00277451
PFAS	SEPHS1	3	4	233	6471	0.000181687	0.00277451
PFAS	USP14	3	4	233	6471	0.000181687	0.00277451
PFAS	NPEPPS	3	4	233	6471	0.000181687	0.00277451
PFAS	YWHAZ	3	4	233	6471	0.000181687	0.00277451
PFAS	PAK2	3	4	233	6471	0.000181687	0.00277451
PFAS	DCPS	3	4	233	6471	0.000181687	0.00277451
PFAS	ISOC1	3	4	233	6471	0.000181687	0.00277451
PFAS	GINS3	3	4	233	6471	0.000181687	0.00277451
PFAS	ERP44	3	4	233	6471	0.000181687	0.00277451
PFAS	ABHD14A	3	4	233	6471	0.000181687	0.00277451
PFAS	PDCD10	3	4	233	6471	0.000181687	0.00277451
PFAS	MAT2B	3	4	233	6471	0.000181687	0.00277451
PFAS	BZW2	3	4	233	6471	0.000181687	0.00277451
PFAS	HEL-S-128m	3	4	233	6471	0.000181687	0.00277451
PFAS	HEL-S-29	3	4	233	6471	0.000181687	0.00277451
PFAS	HEL114	3	4	233	6471	0.000181687	0.00277451
ECE2	EZR	3	4	257	6552	0.000234299	0.00277451
ECE2	NDUFS1	3	4	257	6552	0.000234299	0.00277451
ECE2	CMPK1	3	4	257	6552	0.000234299	0.00277451
EGFR	UBE2V2	3	10	167	12961	0.000239857	0.00277451
CTNNA2	JUP	3	5	336	7538	0.000827466	0.00691557
CTNNA2	CTNNB1	3	5	336	7538	0.000827466	0.00691557
CTNNA2	ZNF639	3	5	225	7538	0.000254173	0.00277451
CTNNB1	HLA-A	3	5	10	6606	3.46e-08	8.66e-07
CTNNB1	BTRC	3	5	9	6606	2.52e-08	6.35e-07
PIK3CA	FBP2	3	5	243	9411	0.000165553	0.00277451
PIK3CA	ADAP1	3	5	243	9411	0.000165553	0.00277451
PIK3CA	NRAS	3	5	240	9411	0.000159574	0.00277451
PIK3CA	HRAS	3	5	240	9411	0.000159574	0.00277451
PIK3CA	KRAS	3	5	243	9411	0.000165553	0.00277451
PIK3CA	FTL	3	5	240	9411	0.000159574	0.00277451
PIK3CA	UMPS	3	5	243	9411	0.000165553	0.00277451
PIK3CA	DDX5	3	5	240	9411	0.000159574	0.00277451
PIK3CA	PIK3R1	3	5	129	9411	2.52e-05	0.000500176
PIK3CA	TMOD1	3	5	246	9411	0.000171677	0.00277451
PIK3CA	STAT1	3	5	243	9411	0.000165553	0.00277451
PIK3CA	RPS20	3	5	240	9411	0.000159574	0.00277451
PIK3CA	MAP2K1	3	5	243	9411	0.000165553	0.00277451
PIK3CA	IL13RA2	3	5	243	9411	0.000165553	0.00277451
PIK3CA	VARS2	3	5	240	9411	0.000159574	0.00277451
PIK3CA	RASGRP3	3	5	246	9411	0.000171677	0.00277451
PIK3CA	GALNT12	3	5	246	9411	0.000171677	0.00277451
PIK3CA	THRSP	3	5	243	9411	0.000165553	0.00277451
PIK3CA	UFD1	3	5	240	9411	0.000159574	0.00277451
PIK3CA	BEX1	3	5	243	9411	0.000165553	0.00277451
PIK3CA	ATP5IF1	3	5	240	9411	0.000159574	0.00277451
PIK3CA	APPL1	3	5	243	9411	0.000165553	0.00277451
SOS1	FYN	3	4	382	9350	0.000264423	0.00277451
SOS1	HCK	3	4	382	9350	0.000264423	0.00277451
SOS1	SRC	3	4	382	9350	0.000264423	0.00277451
SOS1	CRK	3	4	382	9350	0.000264423	0.00277451
SOS1	GRB2	3	4	382	9350	0.000264423	0.00277451
SOS1	GRAP	3	4	394	9350	0.000289846	0.00284165
SOS1	PACSIN3	3	4	382	9350	0.000264423	0.00277451
SOS1	SNX9	3	4	382	9350	0.000264423	0.00277451
MAGI2	DLL1	3	6	329	9643	0.000734968	0.00631536
MAGI2	GRID2	3	6	329	9643	0.000734968	0.00631536
MAGI2	TGFA	3	6	329	9643	0.000734968	0.00631536
MAGI2	ADRB1	3	6	324	9643	0.000702803	0.00608755
MAGI2	ACVR2A	3	6	324	9643	0.000702803	0.00608755
MAGI2	ATN1	3	6	329	9643	0.000734968	0.00631536
MAGI2	PTEN	3	6	329	9643	0.000734968	0.00631536
MAGI2	TTBK1	3	6	329	9643	0.000734968	0.00631536
MAGI2	DSCAML1	3	6	324	9643	0.000702803	0.00608755
MAGI2	ARRDC3	3	6	329	9643	0.000734968	0.00631536
MAGI2	PLXNB3	3	6	324	9643	0.000702803	0.00608755
MAGI2	RAPGEF2	3	6	329	9643	0.000734968	0.00631536
PSKH2	PSMD2	3	3	113	1662	0.000314298	0.00297588
HMCN1	DDX1	3	8	371	18583	0.000413304	0.00375049
HMCN1	CLP1	3	8	371	18583	0.000413304	0.00375049
SPEN	PIR	3	7	422	13294	0.00101691	0.00820427
SPEN	UBE2L6	3	7	422	13294	0.00101691	0.00820427
SPEN	NCOR1	3	7	422	13294	0.00101691	0.00820427
SPEN	BPGM	3	7	422	13294	0.00101691	0.00820427
SPEN	NCK1	3	7	428	13294	0.00105944	0.00848983
SPEN	PLCG1	3	7	428	13294	0.00105944	0.00848983
SPEN	PIK3R1	3	7	428	13294	0.00105944	0.00848983
SPEN	PRDX3	3	7	422	13294	0.00101691	0.00820427
SPEN	CRK	3	7	428	13294	0.00105944	0.00848983
SPEN	CLK1	3	7	422	13294	0.00101691	0.00820427
SPEN	RIDA	3	7	428	13294	0.00105944	0.00848983
SPEN	ATXN1	3	7	428	13294	0.00105944	0.00848983
SPEN	PCBP3	3	7	422	13294	0.00101691	0.00820427
SPEN	GRB2	3	7	428	13294	0.00105944	0.00848983
SPEN	SRPK2	3	7	422	13294	0.00101691	0.00820427
SPEN	RBPJ	3	7	422	13294	0.00101691	0.00820427
SPEN	RUNX1T1	3	7	422	13294	0.00101691	0.00820427
SPEN	PAK1	3	7	422	13294	0.00101691	0.00820427
SPEN	SCYL2	3	7	422	13294	0.00101691	0.00820427
SPEN	NUP54	3	7	422	13294	0.00101691	0.00820427
SPEN	TTN	3	7	422	13294	0.00101691	0.00820427
SPEN	UBE2E2	3	7	422	13294	0.00101691	0.00820427
SPEN	DKFZp434N181	3	7	422	13294	0.00101691	0.00820427
SPEN	SERTAD1	3	7	428	13294	0.00105944	0.00848983
STXBP3	FN1	2	2	117	5895	0.000393916	0.00361068
STXBP3	RPL3	2	2	196	5895	0.00110546	0.00883216
STXBP3	DIS3	2	2	198	5895	0.00112814	0.00900661
DCX	ZBTB5	2	3	79	10139	0.000181185	0.00277451
DCX	DCX	2	3	79	10139	0.000181185	0.00277451
DCX	TRIM27	2	3	79	10139	0.000181185	0.00277451
DCX	TRIM23	2	3	79	10139	0.000181185	0.00277451
DCX	MEOX1	2	3	55	10139	8.8e-05	0.00165791
DCX	TERF1	2	3	79	10139	0.000181185	0.00277451
DCX	KRTAP10-8	2	3	79	10139	0.000181185	0.00277451
DCX	CDK5	2	3	54	10139	8.48e-05	0.00160393
DCX	GOLGA2	2	3	79	10139	0.000181185	0.00277451
DCX	CALCOCO2	2	3	58	10139	9.78e-05	0.00180521
DCX	IKZF1	2	3	59	10139	0.000101192	0.00185826
DCX	KRT40	2	3	79	10139	0.000181185	0.00277451
DCX	RINT1	2	3	79	10139	0.000181185	0.00277451
DCX	ACD	2	3	79	10139	0.000181185	0.00277451
DCX	SPAG5	2	3	79	10139	0.000181185	0.00277451
DCX	PPP1R9B	2	3	79	10139	0.000181185	0.00277451
DCX	TINF2	2	3	79	10139	0.000181185	0.00277451
DCX	KIFC3	2	3	79	10139	0.000181185	0.00277451
DCX	POT1	2	3	79	10139	0.000181185	0.00277451
DCX	MID2	2	3	79	10139	0.000181185	0.00277451
SMARCA5	POLR3A	2	2	149	8385	0.000315767	0.00297588
SMARCA5	PHGDH	2	2	149	8385	0.000315767	0.00297588
SMARCA5	RAD21	2	2	149	8385	0.000315767	0.00297588
SMARCA5	SMARCA5	2	2	149	8385	0.000315767	0.00297588
SMARCA5	MBD3	2	2	149	8385	0.000315767	0.00297588
SMARCA5	VCAM1	2	2	149	8385	0.000315767	0.00297588
SMARCA5	SFPQ	2	2	149	8385	0.000315767	0.00297588
SMARCA5	SMARCA1	2	2	149	8385	0.000315767	0.00297588
SMARCA5	EIF4A3	2	2	149	8385	0.000315767	0.00297588
SMARCA5	MSH2	2	2	149	8385	0.000315767	0.00297588
SMARCA5	CENPA	2	2	149	8385	0.000315767	0.00297588
SMARCA5	PPP1CA	2	2	149	8385	0.000315767	0.00297588
SMARCA5	PRKDC	2	2	149	8385	0.000315767	0.00297588
SMARCA5	H3-3A	2	2	149	8385	0.000315767	0.00297588
SMARCA5	RBBP4	2	2	149	8385	0.000315767	0.00297588
SMARCA5	CHD3	2	2	149	8385	0.000315767	0.00297588
SMARCA5	HDAC1	2	2	149	8385	0.000315767	0.00297588
SMARCA5	SMC1A	2	2	149	8385	0.000315767	0.00297588
SMARCA5	SEPTIN2	2	2	149	8385	0.000315767	0.00297588
SMARCA5	SEPTIN7	2	2	149	8385	0.000315767	0.00297588
SMARCA5	DKFZp686A13234	2	2	149	8385	0.000315767	0.00297588
SMARCA5	SMARCC2	2	2	149	8385	0.000315767	0.00297588
SMARCA5	NELFB	2	2	149	8385	0.000315767	0.00297588
SMARCA5	NCSTN	2	2	149	8385	0.000315767	0.00297588
SMARCA5	ESR2	2	2	149	8385	0.000315767	0.00297588
SMARCA5	HDAC2	2	2	149	8385	0.000315767	0.00297588
SMARCA5	SMARCC1	2	2	149	8385	0.000315767	0.00297588
SMARCA5	IPO9	2	2	149	8385	0.000315767	0.00297588
SMARCA5	RBM14	2	2	149	8385	0.000315767	0.00297588
SMARCA5	RSF1	2	2	149	8385	0.000315767	0.00297588
SMARCA5	POLR1B	2	2	149	8385	0.000315767	0.00297588
SMARCA5	BAZ1A	2	2	149	8385	0.000315767	0.00297588
SMARCA5	POLR3B	2	2	149	8385	0.000315767	0.00297588
SMARCA5	DNMT3B	2	2	149	8385	0.000315767	0.00297588
SMARCA5	MYO1A	2	2	149	8385	0.000315767	0.00297588
SMARCA5	BAZ2A	2	2	149	8385	0.000315767	0.00297588
SMARCA5	BAZ1B	2	2	149	8385	0.000315767	0.00297588
SMARCA5	CSA2	2	2	149	8385	0.000315767	0.00297588
SMARCA5	INO80	2	2	149	8385	0.000315767	0.00297588
SMARCA5	COPS3	2	2	149	8385	0.000315767	0.00297588
SMARCA5	SMC3	2	2	149	8385	0.000315767	0.00297588
SMARCA5	RUVBL2	2	2	149	8385	0.000315767	0.00297588
SMARCA5	RUVBL1	2	2	149	8385	0.000315767	0.00297588
BRD4	CCNT1	2	2	220	10766	0.000417577	0.00375049
BRD4	PRPF40A	2	2	220	10766	0.000417577	0.00375049
BRD4	CLDN1	2	2	220	10766	0.000417577	0.00375049
BRD4	NCK1	2	2	220	10766	0.000417577	0.00375049
BRD4	PIK3R1	2	2	220	10766	0.000417577	0.00375049
BRD4	CRK	2	2	220	10766	0.000417577	0.00375049
BRD4	GRB2	2	2	220	10766	0.000417577	0.00375049
BRD4	H3C1	2	2	220	10766	0.000417577	0.00375049
BRD4	RPL6	2	2	220	10766	0.000417577	0.00375049
BRD4	MESD	2	2	220	10766	0.000417577	0.00375049
BRD4	NUMA1	2	2	220	10766	0.000417577	0.00375049
BRD4	BRD3	2	2	220	10766	0.000417577	0.00375049
BRD4	JMJD6	2	2	220	10766	0.000417577	0.00375049
BRD4	ZC3H18	2	2	220	10766	0.000417577	0.00375049
BRD4	RTF1	2	2	220	10766	0.000417577	0.00375049
BRD4	COPS5	2	2	220	10766	0.000417577	0.00375049
BRD4	CHFR	2	2	220	10766	0.000417577	0.00375049
BRD4	C7orf25	2	2	220	10766	0.000417577	0.00375049
BRD4	NSD3	2	2	220	10766	0.000417577	0.00375049
BRD4	C8orf33	2	2	220	10766	0.000417577	0.00375049
BRD4	DMAP1	2	2	220	10766	0.000417577	0.00375049
BRD4	AP3M1	2	2	220	10766	0.000417577	0.00375049
KLHL2	SDCBP	2	2	112	3872	0.000836691	0.00696008
KLHL2	TNPO2	2	2	112	3872	0.000836691	0.00696008
KLHL2	CLK2	2	2	112	3872	0.000836691	0.00696008
KLHL2	BCAM	2	2	112	3872	0.000836691	0.00696008
KLHL2	ACTC1	2	2	112	3872	0.000836691	0.00696008
KLHL2	ZNF114	2	2	112	3872	0.000836691	0.00696008
EGFR	PDGFRA	2	10	19	12961	9.6e-05	0.00177724
KRAS	PIK3R2	2	2	95	7302	0.000169264	0.00277451
KRAS	PDE6D	2	2	51	7302	4.88e-05	0.000947834
KRAS	FRAT2	2	2	94	7302	0.000165719	0.00277451
KRAS	ZNF189	2	2	94	7302	0.000165719	0.00277451
KRAS	MT-CYB	2	2	96	7302	0.000172846	0.00277451
KRAS	MT-CO3	2	2	94	7302	0.000165719	0.00277451
KRAS	QDPR	2	2	50	7302	4.69e-05	0.000919371
KRAS	PSMA3	2	2	51	7302	4.88e-05	0.000947834
KRAS	ADH6	2	2	51	7302	4.88e-05	0.000947834
KRAS	SERPINB5	2	2	57	7302	6.09e-05	0.00116703
KRAS	PIK3CA	2	2	96	7302	0.000172846	0.00277451
KRAS	RAP1GDS1	2	2	54	7302	5.47e-05	0.00105307
KRAS	CYB	2	2	96	7302	0.000172846	0.00277451
KRAS	PDE4DIP	2	2	95	7302	0.000169264	0.00277451
KRAS	COX3	2	2	96	7302	0.000172846	0.00277451
KRAS	LPAR1	2	2	59	7302	6.53e-05	0.00124813
KRAS	THRSP	2	2	51	7302	4.88e-05	0.000947834
KRAS	HEMGN	2	2	94	7302	0.000165719	0.00277451
KRAS	DDX47	2	2	51	7302	4.88e-05	0.000947834
UGT2B4	STAT5A	2	2	64	2489	0.000661165	0.0057736
SKI	PRMT5	2	2	119	6080	0.000383078	0.00353836
SKI	NCOR1	2	2	119	6080	0.000383078	0.00353836
SKI	GLI2	2	2	119	6080	0.000383078	0.00353836
SKI	GLI3	2	2	119	6080	0.000383078	0.00353836
SKI	SNW1	2	2	119	6080	0.000383078	0.00353836
SKI	SIN3A	2	2	119	6080	0.000383078	0.00353836
PTPN1	LAT	2	2	97	3529	0.00075551	0.00632902
PTPN1	NPHS1	2	2	97	3529	0.00075551	0.00632902
PTPN1	JAK2	2	2	97	3529	0.00075551	0.00632902
PTPN1	ZMPSTE24	2	2	105	3529	0.000885269	0.00729053
PTPN1	ABL1	2	2	97	3529	0.00075551	0.00632902
PTPN1	EGFR	2	2	105	3529	0.000885269	0.00729053
PTPN1	CAPN1	2	2	105	3529	0.000885269	0.00729053
PTPN1	ROS1	2	2	97	3529	0.00075551	0.00632902
PTPN1	PDGFRB	2	2	97	3529	0.00075551	0.00632902
PTPN1	BCR	2	2	97	3529	0.00075551	0.00632902
PTPN1	ACTN1	2	2	105	3529	0.000885269	0.00729053
PTPN1	CAPN2	2	2	105	3529	0.000885269	0.00729053
PTPN1	PTPN1	2	2	97	3529	0.00075551	0.00632902
PTPN1	CDH2	2	2	105	3529	0.000885269	0.00729053
PTPN1	LTK	2	2	97	3529	0.00075551	0.00632902
PTPN1	IRS1	2	2	97	3529	0.00075551	0.00632902
PTPN1	STAT3	2	2	105	3529	0.000885269	0.00729053
PTPN1	STAT5A	2	2	105	3529	0.000885269	0.00729053
PTPN1	CLK1	2	2	105	3529	0.000885269	0.00729053
PTPN1	CLK2	2	2	105	3529	0.000885269	0.00729053
PTPN1	STAT5B	2	2	105	3529	0.000885269	0.00729053
PTPN1	BCAR1	2	2	97	3529	0.00075551	0.00632902
PTPN1	PTK2	2	2	105	3529	0.000885269	0.00729053
PTPN1	ILF3	2	2	97	3529	0.00075551	0.00632902
PTPN1	DKFZp686J11229	2	2	97	3529	0.00075551	0.00632902
PTPN1	CASZ1	2	2	97	3529	0.00075551	0.00632902
PTPN1	TRPV6	2	2	97	3529	0.00075551	0.00632902
PTPN1	BCAS3	2	2	97	3529	0.00075551	0.00632902
PTPN1	MRC2	2	2	97	3529	0.00075551	0.00632902
CDH2	NACA2	2	3	97	4950	0.00113696	0.00907022
NR2F2	NR3C1	2	2	189	6459	0.000856235	0.00711712
NR2F2	LCK	2	2	222	6459	0.00118134	0.0093408
NR2F2	NR2F2	2	2	195	6459	0.000911462	0.00750047
PIK3CA	IL24	2	5	64	9411	0.000456217	0.00408725
PIK3CA	PIK3R3	2	5	85	9411	0.000801131	0.00670595
CDKN2A	CDK6	2	2	28	4400	4.05e-05	0.000796965
MAGEA4	PSMD10	2	2	84	3081	0.000743319	0.00631536
MAGEA4	TK1	2	2	84	3081	0.000743319	0.00631536
MAGEA4	UQCRB	2	2	84	3081	0.000743319	0.00631536
MAGEA4	GTF3C1	2	2	84	3081	0.000743319	0.00631536
MAGEA4	ZBTB17	2	2	84	3081	0.000743319	0.00631536
MAGEA4	AMOT	2	2	84	3081	0.000743319	0.00631536
MAGEA4	TIGD5	2	2	84	3081	0.000743319	0.00631536
MAGEA4	TRIM69	2	2	84	3081	0.000743319	0.00631536
MAGEA4	TEKT4	2	2	84	3081	0.000743319	0.00631536
MAGEA4	WBP2	2	2	84	3081	0.000743319	0.00631536
MAGEA4	BEX2	2	2	84	3081	0.000743319	0.00631536
MAGEA4	UBXN6	2	2	84	3081	0.000743319	0.00631536
MAGEA4	ARNT2	2	2	84	3081	0.000743319	0.00631536
MAGEA4	POT1	2	2	84	3081	0.000743319	0.00631536
MAGEA4	AMOTL2	2	2	84	3081	0.000743319	0.00631536
GRIA4	SDCBP	2	2	275	10083	0.000743851	0.00631536
GRIA4	CAMK2A	2	2	258	10083	0.000654726	0.00572204
KCNA1	DLG4	2	2	266	8361	0.00101216	0.00820427
KCNA1	DLG1	2	2	182	8361	0.000473834	0.00424153
TIAM1	SDC1	2	5	23	8751	6.87e-05	0.00131135
CAMK2B	FAM171A2	2	2	196	8159	0.000577083	0.00504759
CAMK2B	CALM3	2	2	196	8159	0.000577083	0.00504759
CAMK2B	NR2B3	2	2	196	8159	0.000577083	0.00504759
CAMK2B	ACOT7	2	2	196	8159	0.000577083	0.00504759
CAMK2B	RBFOX2	2	2	196	8159	0.000577083	0.00504759
CAMK2B	ACTN4	2	2	196	8159	0.000577083	0.00504759
CAMK2B	HSP90AB1	2	2	196	8159	0.000577083	0.00504759
CAMK2B	PKM	2	2	181	8159	0.000492134	0.00439799
CAMK2B	RXRG	2	2	254	8159	0.000969156	0.00792649
CAMK2B	ATXN1	2	2	196	8159	0.000577083	0.00504759
CAMK2B	KRTAP10-11	2	2	196	8159	0.000577083	0.00504759
CAMK2B	CALM1	2	2	254	8159	0.000969156	0.00792649
CAMK2B	GRIN2B	2	2	196	8159	0.000577083	0.00504759
CAMK2B	MVP	2	2	196	8159	0.000577083	0.00504759
CAMK2B	AP5B1	2	2	196	8159	0.000577083	0.00504759
CAMK2B	KRTAP19-5	2	2	196	8159	0.000577083	0.00504759
CAMK2B	KRTAP19-7	2	2	196	8159	0.000577083	0.00504759
CAMK2B	MGAT5B	2	2	196	8159	0.000577083	0.00504759
CAMK2B	TTC5	2	2	254	8159	0.000969156	0.00792649
CAMK2B	PHKB	2	2	196	8159	0.000577083	0.00504759
CAMK2B	POP5	2	2	116	8159	0.000202135	0.00277451
CAMK2B	CAMK2N2	2	2	196	8159	0.000577083	0.00504759
CAMK2B	MED18	2	2	196	8159	0.000577083	0.00504759
CAMK2B	SMYD3	2	2	254	8159	0.000969156	0.00792649
CAMK2B	SEMA4G	2	2	254	8159	0.000969156	0.00792649
CAMK2B	CCM2L	2	2	196	8159	0.000577083	0.00504759
CAMK2B	MORF4L1	2	2	196	8159	0.000577083	0.00504759
CAMK2B	MAD2L2	2	2	179	8159	0.000481318	0.00430492
CAMK2B	MRPL11	2	2	254	8159	0.000969156	0.00792649
DGKZ	SAT1	2	2	43	10849	1.57e-05	0.000314363
ARHGAP27	RAC1	2	2	213	10419	0.000417933	0.00375054
ARHGAP27	SH3KBP1	2	2	317	10419	0.000925692	0.00760658
LRRC8D	EXOSC4	2	2	43	4852	7.85e-05	0.00148914
LNX1	SAT1	2	2	88	5725	0.000236273	0.00277451
KCNG4	KCNB1	2	3	58	3003	0.00110468	0.00883216
ESR2	hCG_2020860	2	2	99	9337	0.000112423	0.00205393
ESR2	RBM47	2	2	157	9337	0.000282738	0.00277451
ESR2	FBLL1	2	2	89	9337	9.09e-05	0.00170058
ESR2	MYH7B	2	2	157	9337	0.000282738	0.00277451
ESR2	POM121C	2	2	157	9337	0.000282738	0.00277451
ESR2	DDX39A	2	2	157	9337	0.000282738	0.00277451
ESR2	MYO1C	2	2	157	9337	0.000282738	0.00277451
ESR2	LAD1	2	2	157	9337	0.000282738	0.00277451
ESR2	PES1	2	2	157	9337	0.000282738	0.00277451
ESR2	NOP56	2	2	157	9337	0.000282738	0.00277451
ESR2	DDX3X	2	2	157	9337	0.000282738	0.00277451
ESR2	SPTBN2	2	2	157	9337	0.000282738	0.00277451
ESR2	ARPC2	2	2	90	9337	9.29e-05	0.00173597
ESR2	TRIM24	2	2	157	9337	0.000282738	0.00277451
ESR2	NKRF	2	2	157	9337	0.000282738	0.00277451
ESR2	WDR62	2	2	157	9337	0.000282738	0.00277451
ESR2	HR	2	2	157	9337	0.000282738	0.00277451
ESR2	HTATSF1	2	2	157	9337	0.000282738	0.00277451
ESR2	AKAP8	2	2	157	9337	0.000282738	0.00277451
ESR2	MED14	2	2	157	9337	0.000282738	0.00277451
ESR2	SMARCA5	2	2	157	9337	0.000282738	0.00277451
ESR2	CLASP2	2	2	157	9337	0.000282738	0.00277451
ESR2	FLNB	2	2	157	9337	0.000282738	0.00277451
ESR2	NCOR1	2	2	155	9337	0.000275581	0.00277451
ESR2	GIGYF1	2	2	157	9337	0.000282738	0.00277451
ESR2	MED24	2	2	157	9337	0.000282738	0.00277451
ESR2	RBMXL2	2	2	157	9337	0.000282738	0.00277451
ESR2	SURF6	2	2	157	9337	0.000282738	0.00277451
ESR2	NEBL	2	2	157	9337	0.000282738	0.00277451
ESR2	MTA2	2	2	157	9337	0.000282738	0.00277451
ESR2	MYO1D	2	2	157	9337	0.000282738	0.00277451
ESR2	CCNDBP1	2	2	155	9337	0.000275581	0.00277451
ESR2	AP2A1	2	2	157	9337	0.000282738	0.00277451
ESR2	STAU1	2	2	157	9337	0.000282738	0.00277451
ESR2	RPLP0	2	2	103	9337	0.000121691	0.00220072
ESR2	GSN	2	2	157	9337	0.000282738	0.00277451
ESR2	LAMB1	2	2	157	9337	0.000282738	0.00277451
ESR2	VIM	2	2	157	9337	0.000282738	0.00277451
ESR2	HSPA1A	2	2	100	9337	0.000114706	0.00208496
ESR2	HSPA1B	2	2	157	9337	0.000282738	0.00277451
ESR2	HSPA8	2	2	157	9337	0.000282738	0.00277451
ESR2	NEFH	2	2	157	9337	0.000282738	0.00277451
ESR2	ACTN1	2	2	157	9337	0.000282738	0.00277451
ESR2	MYH7	2	2	157	9337	0.000282738	0.00277451
ESR2	SRC	2	2	157	9337	0.000282738	0.00277451
ESR2	GFAP	2	2	157	9337	0.000282738	0.00277451
ESR2	GSPT1	2	2	157	9337	0.000282738	0.00277451
ESR2	H1-2	2	2	157	9337	0.000282738	0.00277451
ESR2	HSPA6	2	2	157	9337	0.000282738	0.00277451
ESR2	RPL17	2	2	101	9337	0.000117011	0.00212326
ESR2	FLG	2	2	157	9337	0.000282738	0.00277451
ESR2	SPRR1B	2	2	157	9337	0.000282738	0.00277451
ESR2	CHM	2	2	157	9337	0.000282738	0.00277451
ESR2	MAPK1	2	2	92	9337	9.71e-05	0.00179519
ESR2	CTNNB1	2	2	157	9337	0.000282738	0.00277451
ESR2	RFC4	2	2	157	9337	0.000282738	0.00277451
ESR2	RFC1	2	2	157	9337	0.000282738	0.00277451
ESR2	SCN1A	2	2	157	9337	0.000282738	0.00277451
ESR2	COPB2	2	2	157	9337	0.000282738	0.00277451
ESR2	LONP1	2	2	157	9337	0.000282738	0.00277451
ESR2	COIL	2	2	157	9337	0.000282738	0.00277451
ESR2	PRPH	2	2	157	9337	0.000282738	0.00277451
ESR2	MKI67	2	2	157	9337	0.000282738	0.00277451
ESR2	RPS9	2	2	157	9337	0.000282738	0.00277451
ESR2	RPL29	2	2	157	9337	0.000282738	0.00277451
ESR2	VPS41	2	2	157	9337	0.000282738	0.00277451
ESR2	RBM25	2	2	157	9337	0.000282738	0.00277451
ESR2	CPT1A	2	2	157	9337	0.000282738	0.00277451
ESR2	FXR2	2	2	157	9337	0.000282738	0.00277451
ESR2	HCFC1	2	2	157	9337	0.000282738	0.00277451
ESR2	CNN1	2	2	157	9337	0.000282738	0.00277451
ESR2	SMTN	2	2	157	9337	0.000282738	0.00277451
ESR2	CSE1L	2	2	157	9337	0.000282738	0.00277451
ESR2	RRP1	2	2	157	9337	0.000282738	0.00277451
ESR2	ACTR3	2	2	157	9337	0.000282738	0.00277451
ESR2	PSMC5	2	2	157	9337	0.000282738	0.00277451
ESR2	RPS18	2	2	157	9337	0.000282738	0.00277451
ESR2	RPS13	2	2	157	9337	0.000282738	0.00277451
ESR2	RPS6	2	2	157	9337	0.000282738	0.00277451
ESR2	RPL23	2	2	157	9337	0.000282738	0.00277451
ESR2	RPS25	2	2	89	9337	9.09e-05	0.00170058
ESR2	RPS26	2	2	157	9337	0.000282738	0.00277451
ESR2	RPL10A	2	2	91	9337	9.5e-05	0.00176246
ESR2	PRKDC	2	2	157	9337	0.000282738	0.00277451
ESR2	LACTB	2	2	157	9337	0.000282738	0.00277451
ESR2	RBM10	2	2	157	9337	0.000282738	0.00277451
ESR2	SRSF2	2	2	157	9337	0.000282738	0.00277451
ESR2	EXOSC10	2	2	157	9337	0.000282738	0.00277451
ESR2	SEMG2	2	2	157	9337	0.000282738	0.00277451
ESR2	MLLT1	2	2	157	9337	0.000282738	0.00277451
ESR2	ARID5A	2	2	155	9337	0.000275581	0.00277451
ESR2	EEF1A2	2	2	157	9337	0.000282738	0.00277451
ESR2	FMR1	2	2	157	9337	0.000282738	0.00277451
ESR2	KHDRBS1	2	2	157	9337	0.000282738	0.00277451
ESR2	ACTN3	2	2	157	9337	0.000282738	0.00277451
ESR2	GOLGA3	2	2	157	9337	0.000282738	0.00277451
ESR2	NCBP1	2	2	157	9337	0.000282738	0.00277451
ESR2	EP300	2	2	155	9337	0.000275581	0.00277451
ESR2	GTF3C1	2	2	157	9337	0.000282738	0.00277451
ESR2	PNRC1	2	2	157	9337	0.000282738	0.00277451
ESR2	TFCP2	2	2	155	9337	0.000275581	0.00277451
ESR2	CDC16	2	2	157	9337	0.000282738	0.00277451
ESR2	ZBTB17	2	2	155	9337	0.000275581	0.00277451
ESR2	PRDX4	2	2	91	9337	9.5e-05	0.00176246
ESR2	SRSF5	2	2	157	9337	0.000282738	0.00277451
ESR2	TCOF1	2	2	157	9337	0.000282738	0.00277451
ESR2	GOLGA4	2	2	157	9337	0.000282738	0.00277451
ESR2	PWP1	2	2	157	9337	0.000282738	0.00277451
ESR2	GNL2	2	2	157	9337	0.000282738	0.00277451
ESR2	CTTN	2	2	157	9337	0.000282738	0.00277451
ESR2	FLNC	2	2	157	9337	0.000282738	0.00277451
ESR2	SMC1A	2	2	157	9337	0.000282738	0.00277451
ESR2	RRP1B	2	2	157	9337	0.000282738	0.00277451
ESR2	NCOA6	2	2	157	9337	0.000282738	0.00277451
ESR2	ZNF638	2	2	157	9337	0.000282738	0.00277451
ESR2	NOLC1	2	2	157	9337	0.000282738	0.00277451
ESR2	EFTUD2	2	2	157	9337	0.000282738	0.00277451
ESR2	SF3B3	2	2	157	9337	0.000282738	0.00277451
ESR2	SF3A1	2	2	157	9337	0.000282738	0.00277451
ESR2	NCOA2	2	2	157	9337	0.000282738	0.00277451
ESR2	MED1	2	2	157	9337	0.000282738	0.00277451
ESR2	JMJD1C	2	2	155	9337	0.000275581	0.00277451
ESR2	CPSF6	2	2	157	9337	0.000282738	0.00277451
ESR2	DBN1	2	2	157	9337	0.000282738	0.00277451
ESR2	VMAC	2	2	157	9337	0.000282738	0.00277451
ESR2	ATG2A	2	2	157	9337	0.000282738	0.00277451
ESR2	NBPF8	2	2	157	9337	0.000282738	0.00277451
ESR2	PREPL	2	2	157	9337	0.000282738	0.00277451
ESR2	PABPC1L	2	2	157	9337	0.000282738	0.00277451
ESR2	RRP12	2	2	157	9337	0.000282738	0.00277451
ESR2	HP1BP3	2	2	157	9337	0.000282738	0.00277451
ESR2	PPRC1	2	2	157	9337	0.000282738	0.00277451
ESR2	KANK2	2	2	157	9337	0.000282738	0.00277451
ESR2	ACSM2B	2	2	157	9337	0.000282738	0.00277451
ESR2	EDC4	2	2	157	9337	0.000282738	0.00277451
ESR2	MIDEAS	2	2	157	9337	0.000282738	0.00277451
ESR2	LARP1	2	2	157	9337	0.000282738	0.00277451
ESR2	FIP1L1	2	2	157	9337	0.000282738	0.00277451
ESR2	CWC27	2	2	157	9337	0.000282738	0.00277451
ESR2	UBR3	2	2	157	9337	0.000282738	0.00277451
ESR2	ACAD11	2	2	157	9337	0.000282738	0.00277451
ESR2	SND1	2	2	157	9337	0.000282738	0.00277451
ESR2	ZC3HAV1	2	2	157	9337	0.000282738	0.00277451
ESR2	MYH14	2	2	157	9337	0.000282738	0.00277451
ESR2	TTC21B	2	2	157	9337	0.000282738	0.00277451
ESR2	CNTRL	2	2	157	9337	0.000282738	0.00277451
ESR2	PBRM1	2	2	157	9337	0.000282738	0.00277451
ESR2	ITIH5	2	2	155	9337	0.000275581	0.00277451
ESR2	CASZ1	2	2	155	9337	0.000275581	0.00277451
ESR2	ZC3H18	2	2	157	9337	0.000282738	0.00277451
ESR2	HEATR4	2	2	157	9337	0.000282738	0.00277451
ESR2	ZSWIM9	2	2	157	9337	0.000282738	0.00277451
ESR2	RFX6	2	2	155	9337	0.000275581	0.00277451
ESR2	GCC2	2	2	157	9337	0.000282738	0.00277451
ESR2	CCAR1	2	2	157	9337	0.000282738	0.00277451
ESR2	FTSJ3	2	2	157	9337	0.000282738	0.00277451
ESR2	KATNAL2	2	2	157	9337	0.000282738	0.00277451
ESR2	PELP1	2	2	157	9337	0.000282738	0.00277451
ESR2	KRI1	2	2	157	9337	0.000282738	0.00277451
ESR2	SERBP1	2	2	157	9337	0.000282738	0.00277451
ESR2	NCOA7	2	2	157	9337	0.000282738	0.00277451
ESR2	SMARCC2	2	2	157	9337	0.000282738	0.00277451
ESR2	SHROOM3	2	2	157	9337	0.000282738	0.00277451
ESR2	GTF3C2	2	2	157	9337	0.000282738	0.00277451
ESR2	PRPF31	2	2	157	9337	0.000282738	0.00277451
ESR2	MYO3B	2	2	157	9337	0.000282738	0.00277451
ESR2	SLC7A6	2	2	157	9337	0.000282738	0.00277451
ESR2	MRPS27	2	2	157	9337	0.000282738	0.00277451
ESR2	NUP205	2	2	157	9337	0.000282738	0.00277451
ESR2	MRPS31	2	2	157	9337	0.000282738	0.00277451
ESR2	TAF15	2	2	157	9337	0.000282738	0.00277451
ESR2	RPL3L	2	2	157	9337	0.000282738	0.00277451
ESR2	MED12	2	2	157	9337	0.000282738	0.00277451
ESR2	PABPC5	2	2	157	9337	0.000282738	0.00277451
ESR2	PTCD3	2	2	157	9337	0.000282738	0.00277451
ESR2	BICD1	2	2	157	9337	0.000282738	0.00277451
ESR2	POM121	2	2	157	9337	0.000282738	0.00277451
ESR2	WNK4	2	2	157	9337	0.000282738	0.00277451
ESR2	ZFP91	2	2	157	9337	0.000282738	0.00277451
ESR2	ZNF512B	2	2	157	9337	0.000282738	0.00277451
ESR2	ZFR	2	2	157	9337	0.000282738	0.00277451
ESR2	RBM14	2	2	157	9337	0.000282738	0.00277451
ESR2	SYNGAP1	2	2	157	9337	0.000282738	0.00277451
ESR2	ASB2	2	2	157	9337	0.000282738	0.00277451
ESR2	SIN3A	2	2	157	9337	0.000282738	0.00277451
ESR2	MMS19	2	2	155	9337	0.000275581	0.00277451
ESR2	RMDN3	2	2	157	9337	0.000282738	0.00277451
ESR2	CDC5L	2	2	157	9337	0.000282738	0.00277451
ESR2	PSMD1	2	2	157	9337	0.000282738	0.00277451
ESR2	PIK3R4	2	2	157	9337	0.000282738	0.00277451
ESR2	MDFI	2	2	155	9337	0.000275581	0.00277451
ESR2	AKAP9	2	2	157	9337	0.000282738	0.00277451
ESR2	DDX50	2	2	157	9337	0.000282738	0.00277451
ESR2	MYBBP1A	2	2	157	9337	0.000282738	0.00277451
ESR2	LRRC1	2	2	157	9337	0.000282738	0.00277451
ESR2	WDR18	2	2	157	9337	0.000282738	0.00277451
ESR2	GNL3	2	2	157	9337	0.000282738	0.00277451
ESR2	CCDC106	2	2	157	9337	0.000282738	0.00277451
ESR2	STK31	2	2	157	9337	0.000282738	0.00277451
ESR2	EIF2A	2	2	157	9337	0.000282738	0.00277451
ESR2	GTPBP4	2	2	157	9337	0.000282738	0.00277451
ESR2	POLR1E	2	2	157	9337	0.000282738	0.00277451
ESR2	NAT10	2	2	157	9337	0.000282738	0.00277451
ESR2	BRD8	2	2	157	9337	0.000282738	0.00277451
ESR2	MYLK2	2	2	157	9337	0.000282738	0.00277451
ESR2	PABPC3	2	2	157	9337	0.000282738	0.00277451
ESR2	PTPN23	2	2	157	9337	0.000282738	0.00277451
ESR2	SENP3	2	2	157	9337	0.000282738	0.00277451
ESR2	EPB41L5	2	2	157	9337	0.000282738	0.00277451
ESR2	EXOSC4	2	2	157	9337	0.000282738	0.00277451
ESR2	UBN1	2	2	157	9337	0.000282738	0.00277451
ESR2	BAZ1A	2	2	157	9337	0.000282738	0.00277451
ESR2	MED17	2	2	157	9337	0.000282738	0.00277451
ESR2	RBM28	2	2	157	9337	0.000282738	0.00277451
ESR2	LYAR	2	2	157	9337	0.000282738	0.00277451
ESR2	TEX10	2	2	157	9337	0.000282738	0.00277451
ESR2	BCLAF1	2	2	157	9337	0.000282738	0.00277451
ESR2	FAM120A	2	2	157	9337	0.000282738	0.00277451
ESR2	RRBP1	2	2	157	9337	0.000282738	0.00277451
ESR2	SIPA1L2	2	2	157	9337	0.000282738	0.00277451
ESR2	CGN	2	2	157	9337	0.000282738	0.00277451
ESR2	ANKFY1	2	2	157	9337	0.000282738	0.00277451
ESR2	EPS15L1	2	2	157	9337	0.000282738	0.00277451
ESR2	COPG2	2	2	157	9337	0.000282738	0.00277451
ESR2	MRC2	2	2	155	9337	0.000275581	0.00277451
ESR2	LIMA1	2	2	157	9337	0.000282738	0.00277451
ESR2	BAIAP2L1	2	2	157	9337	0.000282738	0.00277451
ESR2	MED13	2	2	157	9337	0.000282738	0.00277451
ESR2	DDX41	2	2	157	9337	0.000282738	0.00277451
ESR2	ANAPC5	2	2	157	9337	0.000282738	0.00277451
ESR2	GTF3C4	2	2	157	9337	0.000282738	0.00277451
ESR2	MYH13	2	2	157	9337	0.000282738	0.00277451
ESR2	MED23	2	2	157	9337	0.000282738	0.00277451
ESR2	RIMS2	2	2	157	9337	0.000282738	0.00277451
ESR2	SRRM2	2	2	157	9337	0.000282738	0.00277451
ESR2	DLGAP4	2	2	157	9337	0.000282738	0.00277451
ESR2	MED16	2	2	157	9337	0.000282738	0.00277451
ESR2	MRPS2	2	2	157	9337	0.000282738	0.00277451
ESR2	RTCB	2	2	157	9337	0.000282738	0.00277451
ESR2	RPL36	2	2	91	9337	9.5e-05	0.00176246
ESR2	PKP3	2	2	157	9337	0.000282738	0.00277451
ESR2	TOGARAM1	2	2	157	9337	0.000282738	0.00277451
ESR2	LAS1L	2	2	157	9337	0.000282738	0.00277451
ESR2	PRRC2C	2	2	157	9337	0.000282738	0.00277451
ESR2	GTF3C5	2	2	157	9337	0.000282738	0.00277451
ESR2	GTF3C3	2	2	157	9337	0.000282738	0.00277451
ESR2	HCFC2	2	2	157	9337	0.000282738	0.00277451
ESR2	MYH4	2	2	157	9337	0.000282738	0.00277451
ESR2	NCOA3	2	2	157	9337	0.000282738	0.00277451
ESR2	PIAS3	2	2	155	9337	0.000275581	0.00277451
ESR2	HEL-S-72p	2	2	157	9337	0.000282738	0.00277451
TRIM9	CWF19L2	2	2	67	8945	5.61e-05	0.00107835
GAN	HSP90AB1	2	2	111	15406	5.19e-05	0.00100319
GAN	UBA1	2	2	111	15406	5.19e-05	0.00100319
GAN	MAP1B	2	2	111	15406	5.19e-05	0.00100319
RPF2	DHX15	2	2	57	3922	0.00021122	0.00277451
RPF2	FTSJ3	2	2	70	3922	0.000318552	0.00299686
RPF2	GTPBP4	2	2	70	3922	0.000318552	0.00299686
EBF2	ZNF423	2	2	226	7077	0.00101981	0.00822143
POT1	C2orf74	2	2	91	5897	0.000238134	0.00277451
POT1	ACOT7	2	2	91	5897	0.000238134	0.00277451
POT1	SULT1C2	2	2	91	5897	0.000238134	0.00277451
POT1	HOXA3	2	2	91	5897	0.000238134	0.00277451
POT1	RGS14	2	2	91	5897	0.000238134	0.00277451
POT1	DNPH1	2	2	91	5897	0.000238134	0.00277451
POT1	SULT1B1	2	2	91	5897	0.000238134	0.00277451
POT1	ACTN4	2	2	91	5897	0.000238134	0.00277451
POT1	DOK2	2	2	91	5897	0.000238134	0.00277451
POT1	NOL3	2	2	91	5897	0.000238134	0.00277451
POT1	CPNE3	2	2	91	5897	0.000238134	0.00277451
POT1	EIF3G	2	2	91	5897	0.000238134	0.00277451
POT1	BCAS2	2	2	91	5897	0.000238134	0.00277451
POT1	RECQL4	2	2	91	5897	0.000238134	0.00277451
POT1	GFPT2	2	2	91	5897	0.000238134	0.00277451
POT1	PGLS	2	2	91	5897	0.000238134	0.00277451
POT1	TRIM16	2	2	91	5897	0.000238134	0.00277451
POT1	BAG3	2	2	91	5897	0.000238134	0.00277451
POT1	PAK4	2	2	91	5897	0.000238134	0.00277451
POT1	ALDH1A1	2	2	91	5897	0.000238134	0.00277451
POT1	KRT18	2	2	91	5897	0.000238134	0.00277451
POT1	LDHB	2	2	91	5897	0.000238134	0.00277451
POT1	FES	2	2	91	5897	0.000238134	0.00277451
POT1	ANXA2	2	2	91	5897	0.000238134	0.00277451
POT1	IVL	2	2	91	5897	0.000238134	0.00277451
POT1	HSP90AB1	2	2	91	5897	0.000238134	0.00277451
POT1	RPSA	2	2	91	5897	0.000238134	0.00277451
POT1	ENO2	2	2	91	5897	0.000238134	0.00277451
POT1	FBP1	2	2	91	5897	0.000238134	0.00277451
POT1	ANXA4	2	2	91	5897	0.000238134	0.00277451
POT1	HMOX1	2	2	91	5897	0.000238134	0.00277451
POT1	HSPA1A	2	2	91	5897	0.000238134	0.00277451
POT1	CKB	2	2	91	5897	0.000238134	0.00277451
POT1	ZNF32	2	2	91	5897	0.000238134	0.00277451
POT1	IL1RN	2	2	91	5897	0.000238134	0.00277451
POT1	AHCY	2	2	91	5897	0.000238134	0.00277451
POT1	EIF4B	2	2	91	5897	0.000238134	0.00277451
POT1	MAP4	2	2	91	5897	0.000238134	0.00277451
POT1	GRN	2	2	91	5897	0.000238134	0.00277451
POT1	ALDH3A1	2	2	91	5897	0.000238134	0.00277451
POT1	CORO1A	2	2	91	5897	0.000238134	0.00277451
POT1	STIP1	2	2	91	5897	0.000238134	0.00277451
POT1	PGM1	2	2	91	5897	0.000238134	0.00277451
POT1	ECI1	2	2	91	5897	0.000238134	0.00277451
POT1	MAGEA4	2	2	91	5897	0.000238134	0.00277451
POT1	CRK	2	2	91	5897	0.000238134	0.00277451
POT1	HAAO	2	2	91	5897	0.000238134	0.00277451
POT1	PCP4	2	2	91	5897	0.000238134	0.00277451
POT1	ARRB1	2	2	91	5897	0.000238134	0.00277451
POT1	SARS1	2	2	91	5897	0.000238134	0.00277451
POT1	HNMT	2	2	91	5897	0.000238134	0.00277451
POT1	PEX5	2	2	91	5897	0.000238134	0.00277451
POT1	HLCS	2	2	91	5897	0.000238134	0.00277451
POT1	NAP1L1	2	2	91	5897	0.000238134	0.00277451
POT1	TPI1	2	2	91	5897	0.000238134	0.00277451
POT1	ACTB	2	2	91	5897	0.000238134	0.00277451
POT1	YWHAG	2	2	91	5897	0.000238134	0.00277451
POT1	YWHAE	2	2	91	5897	0.000238134	0.00277451
POT1	CSNK2B	2	2	91	5897	0.000238134	0.00277451
POT1	TUBB4B	2	2	91	5897	0.000238134	0.00277451
POT1	MDM2	2	2	91	5897	0.000238134	0.00277451
POT1	PDE1B	2	2	91	5897	0.000238134	0.00277451
POT1	AMPD2	2	2	91	5897	0.000238134	0.00277451
POT1	PFKP	2	2	91	5897	0.000238134	0.00277451
POT1	TAGLN	2	2	55	5897	8.7e-05	0.00164251
POT1	ACY1	2	2	91	5897	0.000238134	0.00277451
POT1	MVK	2	2	91	5897	0.000238134	0.00277451
POT1	CALD1	2	2	91	5897	0.000238134	0.00277451
POT1	ZFP36L1	2	2	91	5897	0.000238134	0.00277451
POT1	KHDRBS1	2	2	91	5897	0.000238134	0.00277451
POT1	AHNAK	2	2	91	5897	0.000238134	0.00277451
POT1	MAP4K2	2	2	91	5897	0.000238134	0.00277451
POT1	IFRD2	2	2	91	5897	0.000238134	0.00277451
POT1	TUBB2A	2	2	91	5897	0.000238134	0.00277451
POT1	DPYSL3	2	2	91	5897	0.000238134	0.00277451
POT1	MAP7	2	2	91	5897	0.000238134	0.00277451
POT1	GNMT	2	2	91	5897	0.000238134	0.00277451
POT1	MVP	2	2	91	5897	0.000238134	0.00277451
POT1	TRIP10	2	2	91	5897	0.000238134	0.00277451
POT1	TOMM34	2	2	91	5897	0.000238134	0.00277451
POT1	DBN1	2	2	91	5897	0.000238134	0.00277451
POT1	PS1TP5BP1	2	2	91	5897	0.000238134	0.00277451
POT1	MICA	2	2	91	5897	0.000238134	0.00277451
POT1	CTC1	2	2	91	5897	0.000238134	0.00277451
POT1	PHYHD1	2	2	91	5897	0.000238134	0.00277451
POT1	RIF1	2	2	91	5897	0.000238134	0.00277451
POT1	TWF2	2	2	91	5897	0.000238134	0.00277451
POT1	ZNF790	2	2	91	5897	0.000238134	0.00277451
POT1	CNST	2	2	91	5897	0.000238134	0.00277451
POT1	ZBTB49	2	2	91	5897	0.000238134	0.00277451
POT1	PAGE2	2	2	91	5897	0.000238134	0.00277451
POT1	DKFZp686L23131	2	2	91	5897	0.000238134	0.00277451
POT1	PROSER2	2	2	91	5897	0.000238134	0.00277451
POT1	CAMK1D	2	2	91	5897	0.000238134	0.00277451
POT1	PHYKPL	2	2	91	5897	0.000238134	0.00277451
POT1	ANKMY2	2	2	91	5897	0.000238134	0.00277451
POT1	ARID3B	2	2	91	5897	0.000238134	0.00277451
POT1	AFAP1L2	2	2	91	5897	0.000238134	0.00277451
POT1	APPL2	2	2	91	5897	0.000238134	0.00277451
POT1	MADD	2	2	91	5897	0.000238134	0.00277451
POT1	KIAA1191	2	2	91	5897	0.000238134	0.00277451
POT1	ACD	2	2	91	5897	0.000238134	0.00277451
POT1	PGM2	2	2	91	5897	0.000238134	0.00277451
POT1	XAGE2	2	2	91	5897	0.000238134	0.00277451
POT1	PAGE5	2	2	91	5897	0.000238134	0.00277451
POT1	GAS2L1	2	2	91	5897	0.000238134	0.00277451
POT1	GPA33	2	2	91	5897	0.000238134	0.00277451
POT1	SULT4A1	2	2	91	5897	0.000238134	0.00277451
POT1	CPPED1	2	2	91	5897	0.000238134	0.00277451
POT1	TINF2	2	2	91	5897	0.000238134	0.00277451
POT1	CCM2	2	2	91	5897	0.000238134	0.00277451
POT1	ZBED2	2	2	91	5897	0.000238134	0.00277451
POT1	TBCD	2	2	91	5897	0.000238134	0.00277451
POT1	RPAP1	2	2	91	5897	0.000238134	0.00277451
POT1	PACSIN1	2	2	91	5897	0.000238134	0.00277451
POT1	RBKS	2	2	91	5897	0.000238134	0.00277451
POT1	EPB41L1	2	2	91	5897	0.000238134	0.00277451
POT1	CYP4F11	2	2	91	5897	0.000238134	0.00277451
POT1	ISYNA1	2	2	91	5897	0.000238134	0.00277451
POT1	RTN4	2	2	91	5897	0.000238134	0.00277451
POT1	MYO5C	2	2	91	5897	0.000238134	0.00277451
POT1	PRMT7	2	2	91	5897	0.000238134	0.00277451
POT1	DPP3	2	2	91	5897	0.000238134	0.00277451
POT1	AIPL1	2	2	91	5897	0.000238134	0.00277451
POT1	PIPOX	2	2	91	5897	0.000238134	0.00277451
POT1	NCDN	2	2	91	5897	0.000238134	0.00277451
POT1	BIN2	2	2	91	5897	0.000238134	0.00277451
POT1	EVL	2	2	91	5897	0.000238134	0.00277451
POT1	DBNL	2	2	91	5897	0.000238134	0.00277451
POT1	DDX19B	2	2	91	5897	0.000238134	0.00277451
POT1	STUB1	2	2	91	5897	0.000238134	0.00277451
POT1	PACSIN2	2	2	91	5897	0.000238134	0.00277451
POT1	GPR52	2	2	91	5897	0.000238134	0.00277451
POT1	SH3BP1	2	2	91	5897	0.000238134	0.00277451
POT1	CCDC9	2	2	91	5897	0.000238134	0.00277451
POT1	WIPI2	2	2	91	5897	0.000238134	0.00277451
POT1	LAMC3	2	2	91	5897	0.000238134	0.00277451
POT1	HEL-S-182mP	2	2	91	5897	0.000238134	0.00277451
POT1	HEL-S-94n	2	2	91	5897	0.000238134	0.00277451
POT1	HEL-S-53e	2	2	91	5897	0.000238134	0.00277451
POT1	HEL2	2	2	91	5897	0.000238134	0.00277451
POT1	HEL-S-5	2	2	91	5897	0.000238134	0.00277451
POT1	HEL-S-29	2	2	91	5897	0.000238134	0.00277451
CDK12	PRPF40A	2	2	189	12773	0.000218946	0.00277451
CDK12	EWSR1	2	2	189	12773	0.000218946	0.00277451
TUBGCP4	AP2B1	2	2	225	8495	0.000701517	0.00608755
TUBGCP4	GLYCTK	2	2	225	8495	0.000701517	0.00608755
TUBGCP4	KCTD17	2	2	225	8495	0.000701517	0.00608755
TUBGCP4	SDSL	2	2	225	8495	0.000701517	0.00608755
AGO1	PRNP	2	2	304	12886	0.000556559	0.00494893
AGO1	POLR2A	2	2	304	12886	0.000556559	0.00494893
AGO1	RELA	2	2	304	12886	0.000556559	0.00494893
AGO1	PARP2	2	2	304	12886	0.000556559	0.00494893
AGO1	AGO2	2	2	304	12886	0.000556559	0.00494893
CYP46A1	CLK1	2	2	55	9354	3.46e-05	0.000681645
OAS3	CHMP1A	2	4	92	8251	0.000734913	0.00631536
RSL1D1	RRS1	1	1	6	4818	0.00124533	0.00982498
SCNN1A	NEDD4	1	1	7	5876	0.00119129	0.00940554
SCNN1A	NEDD4L	1	1	7	5876	0.00119129	0.00940554
DBN1	PTEN	1	1	5	5119	0.000976753	0.00798254
MPRIP	PPP1R12A	1	1	21	18105	0.0011599	0.00917805
MPRIP	ATXN7	1	1	21	18105	0.0011599	0.00917805
MPRIP	LSM8	1	1	21	18105	0.0011599	0.00917805
MPRIP	YWHAQ	1	1	21	18105	0.0011599	0.00917805
MPRIP	NOS3	1	1	21	18105	0.0011599	0.00917805
MPRIP	RHOA	1	1	21	18105	0.0011599	0.00917805
MPRIP	PIAS4	1	1	21	18105	0.0011599	0.00917805
MPRIP	YTHDC1	1	1	21	18105	0.0011599	0.00917805
MPRIP	PPP1R12C	1	1	21	18105	0.0011599	0.00917805
MPRIP	RACGAP1	1	1	21	18105	0.0011599	0.00917805
MPRIP	IKBKG	1	1	21	18105	0.0011599	0.00917805
KIF6	APPBP2	1	1	16	12593	0.00127055	0.00992882
TRIM59	ESR1	1	1	2	7865	0.000254291	0.00277451
TRIM59	NRM	1	1	1	7865	0.000127146	0.00228393
TRIM59	ZDHHC22	1	1	2	7865	0.000254291	0.00277451
TRIM59	ESR2	1	1	4	7865	0.000508582	0.00454119
TRIM59	VTI1B	1	1	3	7865	0.000381437	0.00353836
DENND6B	UBE2N	1	1	4	5935	0.000673968	0.00587582
DENND6B	UBE2V1	1	1	4	5935	0.000673968	0.00587582
MIPOL1	NEBL	1	1	7	18149	0.000385696	0.00353836
MIPOL1	MCM7	1	1	7	18149	0.000385696	0.00353836
MIPOL1	MAGEA6	1	1	7	18149	0.000385696	0.00353836
MIPOL1	CCT3	1	1	7	18149	0.000385696	0.00353836
MIPOL1	MFAP1	1	1	7	18149	0.000385696	0.00353836
MIPOL1	RTP5	1	1	7	18149	0.000385696	0.00353836
MIPOL1	FAM161A	1	1	7	18149	0.000385696	0.00353836
MIPOL1	UTP25	1	1	7	18149	0.000385696	0.00353836
MIPOL1	ZGPAT	1	1	7	18149	0.000385696	0.00353836
MIPOL1	CCDC33	1	1	7	18149	0.000385696	0.00353836
MIPOL1	MIPOL1	1	1	7	18149	0.000385696	0.00353836
MIPOL1	FBF1	1	1	7	18149	0.000385696	0.00353836
MIPOL1	PRPF31	1	1	7	18149	0.000385696	0.00353836
MIPOL1	PPP1R13B	1	1	7	18149	0.000385696	0.00353836
MIPOL1	SSX3	1	1	7	18149	0.000385696	0.00353836
MIPOL1	TCHP	1	1	7	18149	0.000385696	0.00353836
MIPOL1	SCNM1	1	1	7	18149	0.000385696	0.00353836
MIPOL1	BEX2	1	1	7	18149	0.000385696	0.00353836
MIPOL1	TTC12	1	1	7	18149	0.000385696	0.00353836
MIPOL1	RCOR3	1	1	7	18149	0.000385696	0.00353836
MIPOL1	USH1C	1	1	7	18149	0.000385696	0.00353836
DIO2	USP33	1	1	8	7500	0.00106667	0.00853493
DIO2	WSB1	1	1	8	7500	0.00106667	0.00853493
ZNF775	DKFZp586C1419	1	3	1	6876	0.000436237	0.00391152
TRPV6	PDE9A	1	1	15	11917	0.00125871	0.00984347
TRPV6	PRKCA	1	1	15	11917	0.00125871	0.00984347
TRPV6	PTPN1	1	1	15	11917	0.00125871	0.00984347
TRPV6	KRTAP10-3	1	1	15	11917	0.00125871	0.00984347
TRPV6	KRTAP10-8	1	1	15	11917	0.00125871	0.00984347
TRPV6	TRAF1	1	1	15	11917	0.00125871	0.00984347
TRPV6	KRT40	1	1	15	11917	0.00125871	0.00984347
TRPV6	NOTCH2NLA	1	1	15	11917	0.00125871	0.00984347
TRPV6	PNMA1	1	1	15	11917	0.00125871	0.00984347
TRPV6	MDFI	1	1	15	11917	0.00125871	0.00984347
TRPV6	TRPV6	1	1	15	11917	0.00125871	0.00984347
TRPV6	MID2	1	1	15	11917	0.00125871	0.00984347
STX18	NSG2	1	1	2	5332	0.000375094	0.00352568

## Sheet: S9c
Gene1	Gene2	k	n	M	N	P	FDR
TP53	TP53	16	25	163	3924	1.11e-15	8.23e-12
TP53	SIN3B	13	25	173	3924	7.49e-12	9.5e-10
TP53	MTA2	13	25	173	3924	7.49e-12	9.5e-10
TP53	EFEMP2	13	25	173	3924	7.49e-12	9.5e-10
TP53	CHEK2	13	25	162	3924	3.29e-12	9.04e-10
TP53	AGT	13	25	176	3924	9.29e-12	1.01e-09
TP53	HSP90AB1	13	25	162	3924	3.29e-12	9.04e-10
TP53	HSPA1A	13	25	173	3924	7.49e-12	9.5e-10
TP53	AR	13	25	144	3924	7.51e-13	6.96e-10
TP53	HSPA8	13	25	176	3924	9.29e-12	1.01e-09
TP53	TOP1	13	25	176	3924	9.29e-12	1.01e-09
TP53	XRCC6	13	25	176	3924	9.29e-12	1.01e-09
TP53	MUC1	13	25	173	3924	7.49e-12	9.5e-10
TP53	PLCG2	13	25	173	3924	7.49e-12	9.5e-10
TP53	DDX5	13	25	176	3924	9.29e-12	1.01e-09
TP53	EGR1	13	25	173	3924	7.49e-12	9.5e-10
TP53	EIF2AK2	13	25	176	3924	9.29e-12	1.01e-09
TP53	CR2	13	25	173	3924	7.49e-12	9.5e-10
TP53	ANXA7	13	25	162	3924	3.29e-12	9.04e-10
TP53	NR4A1	13	25	173	3924	7.49e-12	9.5e-10
TP53	PML	13	25	173	3924	7.49e-12	9.5e-10
TP53	TTK	13	25	173	3924	7.49e-12	9.5e-10
TP53	PTGS2	13	25	176	3924	9.29e-12	1.01e-09
TP53	SREBF1	13	25	173	3924	7.49e-12	9.5e-10
TP53	HSPA9	13	25	176	3924	9.29e-12	1.01e-09
TP53	MAGEA2	13	25	199	3924	4.28e-11	3.87e-09
TP53	MAP1B	13	25	173	3924	7.49e-12	9.5e-10
TP53	RANBP2	13	25	173	3924	7.49e-12	9.5e-10
TP53	CSE1L	13	25	176	3924	9.29e-12	1.01e-09
TP53	ELL	13	25	173	3924	7.49e-12	9.5e-10
TP53	CDC42	13	25	162	3924	3.29e-12	9.04e-10
TP53	UBA52	13	25	162	3924	3.29e-12	9.04e-10
TP53	UBE2I	13	25	162	3924	3.29e-12	9.04e-10
TP53	CSNK2B	13	25	162	3924	3.29e-12	9.04e-10
TP53	ANK2	13	25	173	3924	7.49e-12	9.5e-10
TP53	PRKCD	13	25	199	3924	4.28e-11	3.87e-09
TP53	SREBF2	13	25	173	3924	7.49e-12	9.5e-10
TP53	TRIM28	13	25	173	3924	7.49e-12	9.5e-10
TP53	CUL4A	13	25	176	3924	9.29e-12	1.01e-09
TP53	COX17	13	25	162	3924	3.29e-12	9.04e-10
TP53	USP10	13	25	173	3924	7.49e-12	9.5e-10
TP53	PRKD1	13	25	173	3924	7.49e-12	9.5e-10
TP53	DHCR24	13	25	173	3924	7.49e-12	9.5e-10
TP53	GUSBP1	13	25	162	3924	3.29e-12	9.04e-10
TP53	NCOA2	13	25	173	3924	7.49e-12	9.5e-10
TP53	MED1	13	25	173	3924	7.49e-12	9.5e-10
TP53	NCOA1	13	25	173	3924	7.49e-12	9.5e-10
TP53	IFI16	13	25	173	3924	7.49e-12	9.5e-10
TP53	MAP9	13	25	173	3924	7.49e-12	9.5e-10
TP53	KDM4D	13	25	176	3924	9.29e-12	1.01e-09
TP53	KANSL1	13	25	173	3924	7.49e-12	9.5e-10
TP53	HUWE1	13	25	173	3924	7.49e-12	9.5e-10
TP53	CARM1	13	25	176	3924	9.29e-12	1.01e-09
TP53	FBXO11	13	25	173	3924	7.49e-12	9.5e-10
TP53	VRK2	13	25	176	3924	9.29e-12	1.01e-09
TP53	HIPK1	13	25	173	3924	7.49e-12	9.5e-10
TP53	PIAS4	13	25	162	3924	3.29e-12	9.04e-10
TP53	CABLES1	13	25	173	3924	7.49e-12	9.5e-10
TP53	SMARCC1	13	25	173	3924	7.49e-12	9.5e-10
TP53	EHMT2	13	25	173	3924	7.49e-12	9.5e-10
TP53	MAGEB18	13	25	162	3924	3.29e-12	9.04e-10
TP53	UHRF2	13	25	173	3924	7.49e-12	9.5e-10
TP53	HIPK3	13	25	173	3924	7.49e-12	9.5e-10
TP53	USP42	13	25	173	3924	7.49e-12	9.5e-10
TP53	CXXC1	13	25	173	3924	7.49e-12	9.5e-10
TP53	MAGEC2	13	25	176	3924	9.29e-12	1.01e-09
TP53	ZMIZ1	13	25	173	3924	7.49e-12	9.5e-10
TP53	CDC14A	13	25	199	3924	4.28e-11	3.87e-09
TP53	NCOR2	13	25	173	3924	7.49e-12	9.5e-10
TP53	CABL1	12	25	130	3924	6.07e-12	9.5e-10
TP53	HSPA1B	12	25	115	3924	1.46e-12	8.83e-10
TP53	NR1i1	12	25	126	3924	4.23e-12	9.5e-10
TP53	DVL2	12	25	157	3924	5.37e-11	3.87e-09
TP53	DLEU1	12	25	157	3924	5.37e-11	3.87e-09
TP53	FOXO3	12	25	157	3924	5.37e-11	3.87e-09
TP53	NUAK1	12	25	130	3924	6.07e-12	9.5e-10
TP53	PIAS1	12	25	157	3924	5.37e-11	3.87e-09
TP53	PIAS2	12	25	157	3924	5.37e-11	3.87e-09
TP53	BAG2	12	25	124	3924	3.51e-12	9.47e-10
TP53	PTTG1	12	25	128	3924	5.08e-12	9.5e-10
TP53	TFAP2A	12	25	118	3924	1.97e-12	8.87e-10
TP53	CDK1	12	25	104	3924	4.53e-13	5.17e-10
TP53	SP1	12	25	157	3924	5.37e-11	3.87e-09
TP53	PARP1	12	25	157	3924	5.37e-11	3.87e-09
TP53	UBC	12	25	157	3924	5.37e-11	3.87e-09
TP53	BCR	12	25	157	3924	5.37e-11	3.87e-09
TP53	BMP1	12	25	157	3924	5.37e-11	3.87e-09
TP53	ZNF24	12	25	157	3924	5.37e-11	3.87e-09
TP53	CEBPB	12	25	118	3924	1.97e-12	8.87e-10
TP53	NCL	12	25	157	3924	5.37e-11	3.87e-09
TP53	ERCC3	12	25	116	3924	1.62e-12	8.83e-10
TP53	CDK2	12	25	108	3924	7.05e-13	6.96e-10
TP53	YY1	12	25	117	3924	1.79e-12	8.83e-10
TP53	MSX1	12	25	119	3924	2.18e-12	9.04e-10
TP53	PHB1	12	25	114	3924	1.32e-12	8.83e-10
TP53	BRCA1	12	25	157	3924	5.37e-11	3.87e-09
TP53	HTT	12	25	157	3924	5.37e-11	3.87e-09
TP53	CRK	12	25	116	3924	1.62e-12	8.83e-10
TP53	CCT5	12	25	157	3924	5.37e-11	3.87e-09
TP53	TAF6	12	25	120	3924	2.4e-12	9.04e-10
TP53	SULT1E1	12	25	106	3924	5.66e-13	6e-10
TP53	BRCA2	12	25	157	3924	5.37e-11	3.87e-09
TP53	PLK1	12	25	157	3924	5.37e-11	3.87e-09
TP53	BLM	12	25	157	3924	5.37e-11	3.87e-09
TP53	CCL18	12	25	111	3924	9.69e-13	8.45e-10
TP53	PRKDC	12	25	157	3924	5.37e-11	3.87e-09
TP53	E2F1	12	25	129	3924	5.55e-12	9.5e-10
TP53	UBE3A	12	25	157	3924	5.37e-11	3.87e-09
TP53	SRSF1	12	25	116	3924	1.62e-12	8.83e-10
TP53	CHD3	12	25	157	3924	5.37e-11	3.87e-09
TP53	GPS2	12	25	118	3924	1.97e-12	8.87e-10
TP53	ATM	12	25	157	3924	5.37e-11	3.87e-09
TP53	ATR	12	25	157	3924	5.37e-11	3.87e-09
TP53	WRN	12	25	157	3924	5.37e-11	3.87e-09
TP53	KIAA0087	12	25	157	3924	5.37e-11	3.87e-09
TP53	CUL7	12	25	157	3924	5.37e-11	3.87e-09
TP53	SAFB	12	25	125	3924	3.85e-12	9.5e-10
TP53	TWIST1	12	25	122	3924	2.91e-12	9.04e-10
TP53	MAPK11	12	25	101	3924	3.23e-13	3.99e-10
TP53	LAMA4	12	25	157	3924	5.37e-11	3.87e-09
TP53	HIF1A	12	25	157	3924	5.37e-11	3.87e-09
TP53	UFD1L	12	25	115	3924	1.46e-12	8.83e-10
TP53	E4F1	12	25	130	3924	6.07e-12	9.5e-10
TP53	FBXO42	12	25	127	3924	4.63e-12	9.5e-10
TP53	CUL9	12	25	157	3924	5.37e-11	3.87e-09
TP53	THAP8	12	25	157	3924	5.37e-11	3.87e-09
TP53	ZMIZ2	12	25	121	3924	2.64e-12	9.04e-10
TP53	ZCCHC10	12	25	157	3924	5.37e-11	3.87e-09
TP53	FCAMR	12	25	157	3924	5.37e-11	3.87e-09
TP53	ING5	12	25	117	3924	1.79e-12	8.83e-10
TP53	TFAP2C	12	25	123	3924	3.19e-12	9.04e-10
TP53	KAT2B	12	25	157	3924	5.37e-11	3.87e-09
TP53	SIRT1	12	25	157	3924	5.37e-11	3.87e-09
TP53	TOE1	12	25	115	3924	1.46e-12	8.83e-10
TP53	NDN	12	25	122	3924	2.91e-12	9.04e-10
TP53	BAG1	12	25	120	3924	2.4e-12	9.04e-10
TP53	HINFP	12	25	157	3924	5.37e-11	3.87e-09
TP53	CCDC106	12	25	157	3924	5.37e-11	3.87e-09
TP53	BTBD2	12	25	157	3924	5.37e-11	3.87e-09
TP53	WDR33	12	25	157	3924	5.37e-11	3.87e-09
TP53	HIPK2	12	25	157	3924	5.37e-11	3.87e-09
TP53	PLK3	12	25	157	3924	5.37e-11	3.87e-09
TP53	EHMT1	12	25	157	3924	5.37e-11	3.87e-09
TP53	BRD7	12	25	117	3924	1.79e-12	8.83e-10
TP53	KMT5A	12	25	116	3924	1.62e-12	8.83e-10
TP53	TOPORS	12	25	157	3924	5.37e-11	3.87e-09
TP53	BABAM2	12	25	121	3924	2.64e-12	9.04e-10
TP53	WWOX	12	25	122	3924	2.91e-12	9.04e-10
TP53	DAXX	12	25	157	3924	5.37e-11	3.87e-09
TP53	ING1	12	25	120	3924	2.4e-12	9.04e-10
TP53	ZHX1	12	25	157	3924	5.37e-11	3.87e-09
TP53	PCDHA4	12	25	157	3924	5.37e-11	3.87e-09
TP53	ING4	12	25	114	3924	1.32e-12	8.83e-10
TP53	UBE2J1	12	25	116	3924	1.62e-12	8.83e-10
TP53	L3MBTL1	12	25	127	3924	4.63e-12	9.5e-10
TP53	SNURF	12	25	157	3924	5.37e-11	3.87e-09
TP53	SCAMP1	11	25	106	3924	1.75e-11	1.73e-09
TP53	ARIH2	11	25	104	3924	1.43e-11	1.45e-09
TP53	PNP	11	25	100	3924	9.43e-12	1.01e-09
TP53	TK1	11	25	94	3924	4.87e-12	9.5e-10
TP53	HSPB1	11	25	106	3924	1.75e-11	1.73e-09
TP53	NPM1	11	25	98	3924	7.6e-12	9.55e-10
TP53	TPT1	11	25	112	3924	3.15e-11	3e-09
TP53	GPX2	11	25	101	3924	1.05e-11	1.12e-09
TP53	ATF3	11	25	102	3924	1.16e-11	1.22e-09
TP53	EIF2S2	11	25	96	3924	6.1e-12	9.5e-10
TP53	SAT1	11	25	97	3924	6.81e-12	9.5e-10
TP53	S100A1	11	25	100	3924	9.43e-12	1.01e-09
TP53	RPS3	11	25	108	3924	2.14e-11	2.07e-09
TP53	STAT1	11	25	116	3924	4.57e-11	3.87e-09
TP53	MAPK8	11	25	95	3924	5.45e-12	9.5e-10
TP53	UBE2A	11	25	106	3924	1.75e-11	1.73e-09
TP53	TMSB4X	11	25	100	3924	9.43e-12	1.01e-09
TP53	SNRPN	11	25	99	3924	8.47e-12	1.01e-09
TP53	SUMO1	11	25	104	3924	1.43e-11	1.45e-09
TP53	RAD51	11	25	109	3924	2.36e-11	2.27e-09
TP53	MAD2L1BP	11	25	103	3924	1.29e-11	1.34e-09
TP53	TAF9	11	25	100	3924	9.43e-12	1.01e-09
TP53	BAK1	11	25	111	3924	2.86e-11	2.74e-09
TP53	COPS5	11	25	102	3924	1.16e-11	1.22e-09
TP53	KAT5	11	25	102	3924	1.16e-11	1.22e-09
TP53	EAF2	11	25	118	3924	5.48e-11	3.93e-09
TP53	PBK	11	25	105	3924	1.59e-11	1.6e-09
TP53	RCHY1	11	25	99	3924	8.47e-12	1.01e-09
TP53	HDAC8	11	25	107	3924	1.94e-11	1.89e-09
TP53	FXYD6	11	25	107	3924	1.94e-11	1.89e-09
TP53	STUB1	11	25	104	3924	1.43e-11	1.45e-09
TP53	CHEK1	10	25	108	3924	5.58e-10	3.78e-08
TP53	APOH	10	25	104	3924	3.88e-10	2.68e-08
TP53	TRIM27	10	25	106	3924	4.66e-10	3.17e-08
TP53	NQO1	10	25	125	3924	2.27e-09	1.45e-07
TP53	RRM2	10	25	114	3924	9.38e-10	6.26e-08
TP53	CDKN1A	10	25	99	3924	2.41e-10	1.7e-08
TP53	MRE11	10	25	115	3924	1.02e-09	6.78e-08
TP53	STX5	10	25	93	3924	1.32e-10	9.36e-09
TP53	TDG	10	25	100	3924	2.66e-10	1.86e-08
TP53	PPA1	10	25	101	3924	2.93e-10	2.04e-08
TP53	JMJD6	10	25	105	3924	4.25e-10	2.91e-08
TP53	RRM2B	10	25	105	3924	4.25e-10	2.91e-08
TP53	MPHOSPH6	10	25	94	3924	1.46e-10	1.03e-08
TP53	ANTKMT	10	25	93	3924	1.32e-10	9.36e-09
TP53	PSMD11	9	25	81	3924	1.03e-09	6.82e-08
TP53	IKBKB	9	25	111	3924	1.57e-08	8.31e-07
TP53	AURKA	9	25	107	3924	1.15e-08	6.22e-07
TP53	PRKAB2	9	25	106	3924	1.06e-08	5.8e-07
TP53	KDM1A	9	25	99	3924	5.86e-09	3.38e-07
TP53	S100B	9	25	94	3924	3.75e-09	2.26e-07
TP53	S100A8	9	25	97	3924	4.92e-09	2.88e-07
TP53	S100A6	9	25	104	3924	8.97e-09	4.98e-07
TP53	HSP90AA1	9	25	86	3924	1.73e-09	1.13e-07
TP53	BCL2	9	25	108	3924	1.24e-08	6.71e-07
TP53	TXN	9	25	110	3924	1.45e-08	7.72e-07
TP53	VDR	9	25	103	3924	8.25e-09	4.63e-07
TP53	ANXA3	9	25	87	3924	1.92e-09	1.24e-07
TP53	RCC1	9	25	79	3924	8.29e-10	5.56e-08
TP53	TBP	9	25	107	3924	1.15e-08	6.22e-07
TP53	RAB4A	9	25	92	3924	3.11e-09	1.91e-07
TP53	GADD45A	9	25	95	3924	4.11e-09	2.45e-07
TP53	NFKBIA	9	25	104	3924	8.97e-09	4.98e-07
TP53	APEX1	9	25	84	3924	1.41e-09	9.23e-08
TP53	MAPK1	9	25	93	3924	3.42e-09	2.08e-07
TP53	S100A2	9	25	110	3924	1.45e-08	7.72e-07
TP53	ARL3	9	25	100	3924	6.39e-09	3.66e-07
TP53	PPP1CC	9	25	93	3924	3.42e-09	2.08e-07
TP53	STAT6	9	25	113	3924	1.83e-08	9.65e-07
TP53	CDKN2A	9	25	91	3924	2.83e-09	1.76e-07
TP53	CDKN2C	9	25	106	3924	1.06e-08	5.8e-07
TP53	MAPK9	9	25	97	3924	4.92e-09	2.88e-07
TP53	BRCC3	9	25	95	3924	4.11e-09	2.45e-07
TP53	RPS10	9	25	97	3924	4.92e-09	2.88e-07
TP53	GSK3B	9	25	91	3924	2.83e-09	1.76e-07
TP53	SERPINB9	9	25	93	3924	3.42e-09	2.08e-07
TP53	CDK7	9	25	103	3924	8.25e-09	4.63e-07
TP53	UBE2D1	9	25	103	3924	8.25e-09	4.63e-07
TP53	UBE2D3	9	25	109	3924	1.34e-08	7.21e-07
TP53	UBE2K	9	25	101	3924	6.97e-09	3.97e-07
TP53	UBE2N	9	25	107	3924	1.15e-08	6.22e-07
TP53	RAP1B	9	25	92	3924	3.11e-09	1.91e-07
TP53	PPP1CA	9	25	90	3924	2.57e-09	1.62e-07
TP53	YWHAE	9	25	98	3924	5.37e-09	3.11e-07
TP53	UBE2D2	9	25	105	3924	9.74e-09	5.39e-07
TP53	CSNK2A1	9	25	72	3924	3.69e-10	2.56e-08
TP53	NTHL1	9	25	110	3924	1.45e-08	7.72e-07
TP53	ERH	9	25	98	3924	5.37e-09	3.11e-07
TP53	GSTM4	9	25	89	3924	2.33e-09	1.49e-07
TP53	GPS1	9	25	109	3924	1.34e-08	7.21e-07
TP53	AIMP2	9	25	100	3924	6.39e-09	3.66e-07
TP53	PIN1	9	25	95	3924	4.11e-09	2.45e-07
TP53	HDAC1	9	25	96	3924	4.49e-09	2.67e-07
TP53	PAFAH1B3	9	25	98	3924	5.37e-09	3.11e-07
TP53	NR0B2	9	25	119	3924	2.85e-08	1.5e-06
TP53	MAPK14	9	25	104	3924	8.97e-09	4.98e-07
TP53	SMN1	9	25	91	3924	2.83e-09	1.76e-07
TP53	MAPKAPK5	9	25	82	3924	1.15e-09	7.52e-08
TP53	UFD1	9	25	89	3924	2.33e-09	1.49e-07
TP53	VRK1	9	25	87	3924	1.92e-09	1.24e-07
TP53	DUSP26	9	25	103	3924	8.25e-09	4.63e-07
TP53	APPL1	9	25	90	3924	2.57e-09	1.62e-07
TP53	TP53BP1	7	25	53	3924	3.18e-08	1.67e-06
KRAS	PIK3R2	6	6	95	7302	4.85e-12	9.5e-10
KRAS	PDE6D	6	6	51	7302	1.16e-13	2.16e-10
KRAS	FRAT2	6	6	94	7302	4.55e-12	9.5e-10
KRAS	ZNF189	6	6	94	7302	4.55e-12	9.5e-10
KRAS	MT-CYB	6	6	96	7302	5.16e-12	9.5e-10
KRAS	MT-CO3	6	6	94	7302	4.55e-12	9.5e-10
KRAS	QDPR	6	6	50	7302	1.03e-13	2.16e-10
KRAS	PSMA3	6	6	51	7302	1.16e-13	2.16e-10
KRAS	ADH6	6	6	51	7302	1.16e-13	2.16e-10
KRAS	SERPINB5	6	6	57	7302	2.26e-13	3.35e-10
KRAS	PIK3CA	6	6	96	7302	5.16e-12	9.5e-10
KRAS	RAP1GDS1	6	6	54	7302	1.63e-13	2.69e-10
KRAS	CYB	6	6	96	7302	5.16e-12	9.5e-10
KRAS	PDE4DIP	6	6	95	7302	4.85e-12	9.5e-10
KRAS	COX3	6	6	96	7302	5.16e-12	9.5e-10
KRAS	LPAR1	6	6	59	7302	2.79e-13	3.76e-10
KRAS	THRSP	6	6	51	7302	1.16e-13	2.16e-10
KRAS	HEMGN	6	6	94	7302	4.55e-12	9.5e-10
KRAS	DDX47	6	6	51	7302	1.16e-13	2.16e-10
TP53	TP53BP2	6	25	17	3924	1.09e-09	7.19e-08
TP53	PPP1R13L	6	25	16	3924	7.62e-10	5.13e-08
EGFR	HSPA1B	4	4	280	12961	2.18e-07	1.14e-05
AFP	RUTBC1	4	4	132	3259	2.69e-06	0.000132149
AFP	SGSM2	4	4	132	3259	2.69e-06	0.000132149
AFP	CASP3	4	4	215	3259	1.89e-05	0.000821301
AFP	MED27	4	4	132	3259	2.69e-06	0.000132149
AFP	EHD4	4	4	217	3259	1.97e-05	0.000847335
AFP	PIDD1	4	4	132	3259	2.69e-06	0.000132149
SERPINA5	COPS6	4	4	132	3753	1.53e-06	7.64e-05
SERPINA5	PIAS4	4	4	132	3753	1.53e-06	7.64e-05
SERPINA5	HEL-S-78p	4	4	132	3753	1.53e-06	7.64e-05
KCNA4	SAT1	4	5	235	4195	4.7e-05	0.00184641
PIK3CA	FBP2	4	9	243	9411	5.05e-05	0.00188984
PIK3CA	ADAP1	4	9	243	9411	5.05e-05	0.00188984
PIK3CA	NRAS	4	9	240	9411	4.81e-05	0.00184721
PIK3CA	HRAS	4	9	240	9411	4.81e-05	0.00184721
PIK3CA	KRAS	4	9	243	9411	5.05e-05	0.00188984
PIK3CA	FTL	4	9	240	9411	4.81e-05	0.00184721
PIK3CA	UMPS	4	9	243	9411	5.05e-05	0.00188984
PIK3CA	DDX5	4	9	240	9411	4.81e-05	0.00184721
PIK3CA	TMOD1	4	9	246	9411	5.29e-05	0.00195762
PIK3CA	STAT1	4	9	243	9411	5.05e-05	0.00188984
PIK3CA	RPS20	4	9	240	9411	4.81e-05	0.00184721
PIK3CA	MAP2K1	4	9	243	9411	5.05e-05	0.00188984
PIK3CA	IL13RA2	4	9	243	9411	5.05e-05	0.00188984
PIK3CA	VARS2	4	9	240	9411	4.81e-05	0.00184721
PIK3CA	RASGRP3	4	9	246	9411	5.29e-05	0.00195762
PIK3CA	GALNT12	4	9	246	9411	5.29e-05	0.00195762
PIK3CA	THRSP	4	9	243	9411	5.05e-05	0.00188984
PIK3CA	UFD1	4	9	240	9411	4.81e-05	0.00184721
PIK3CA	BEX1	4	9	243	9411	5.05e-05	0.00188984
PIK3CA	ATP5IF1	4	9	240	9411	4.81e-05	0.00184721
PIK3CA	APPL1	4	9	243	9411	5.05e-05	0.00188984
DNM1	BIN1	4	4	239	5585	3.35e-06	0.000157371
DNM1	NCK2	4	4	239	5585	3.35e-06	0.000157371
DNM1	NPM3	4	4	356	5585	1.65e-05	0.000717901
DNM1	PIAS1	4	4	239	5585	3.35e-06	0.000157371
DNM1	ABL1	4	4	239	5585	3.35e-06	0.000157371
DNM1	SRC	4	4	356	5585	1.65e-05	0.000717901
DNM1	FER	4	4	239	5585	3.35e-06	0.000157371
DNM1	NCL	4	4	239	5585	3.35e-06	0.000157371
DNM1	HTT	4	4	239	5585	3.35e-06	0.000157371
DNM1	AMPH	4	4	239	5585	3.35e-06	0.000157371
DNM1	GRB2	4	4	356	5585	1.65e-05	0.000717901
DNM1	UBE2I	4	4	241	5585	3.47e-06	0.000162191
DNM1	CDK5	4	4	356	5585	1.65e-05	0.000717901
DNM1	ITSN1	4	4	239	5585	3.35e-06	0.000157371
DNM1	TIMM50	4	4	356	5585	1.65e-05	0.000717901
DNM1	LRRK2	4	4	239	5585	3.35e-06	0.000157371
DNM1	UBE2DNL	4	4	356	5585	1.65e-05	0.000717901
DNM1	ASB13	4	4	356	5585	1.65e-05	0.000717901
DNM1	FNBP1	4	4	239	5585	3.35e-06	0.000157371
DNM1	SH3GL1	4	4	356	5585	1.65e-05	0.000717901
DNM1	SH3GL2	4	4	356	5585	1.65e-05	0.000717901
DNM1	SH3GL3	4	4	356	5585	1.65e-05	0.000717901
DNM1	FANCD2	4	4	393	5585	2.45e-05	0.00104175
DNM1	PACSIN1	4	4	356	5585	1.65e-05	0.000717901
DNM1	TBC1D2	4	4	239	5585	3.35e-06	0.000157371
DNM1	IRF2BPL	4	4	239	5585	3.35e-06	0.000157371
DNM1	CEP126	4	4	239	5585	3.35e-06	0.000157371
DNM1	PACSIN3	4	4	356	5585	1.65e-05	0.000717901
DNM1	PIN4	4	4	356	5585	1.65e-05	0.000717901
DNM1	MED31	4	4	356	5585	1.65e-05	0.000717901
DNM1	SNX9	4	4	356	5585	1.65e-05	0.000717901
DNM1	Pe1Fe6	4	4	356	5585	1.65e-05	0.000717901
PIWIL1	HSP90AA1	4	4	178	5280	1.29e-06	6.51e-05
PIWIL1	HSP90AB1	4	4	178	5280	1.29e-06	6.51e-05
PIWIL1	PPP5C	4	4	178	5280	1.29e-06	6.51e-05
PIWIL1	HSF2	4	4	178	5280	1.29e-06	6.51e-05
PIWIL1	FKBP5	4	4	178	5280	1.29e-06	6.51e-05
PIWIL1	SND1	4	4	178	5280	1.29e-06	6.51e-05
PIWIL1	NUDCD3	4	4	178	5280	1.29e-06	6.51e-05
PIWIL1	DICER1	4	4	178	5280	1.29e-06	6.51e-05
PIWIL1	NUDC	4	4	178	5280	1.29e-06	6.51e-05
PIWIL1	TDRKH	4	4	178	5280	1.29e-06	6.51e-05
DPYSL4	PTPRO	3	3	93	3176	2.51e-05	0.00106378
DPYSL4	SH3GL3	3	3	174	3176	0.00016444	0.00537109
SERPINA5	SERPINA5	3	4	113	3753	0.000106719	0.00362965
ANK1	CD44	3	6	311	10799	0.000447459	0.00906471
ANK1	SPTAN1	3	6	311	10799	0.000447459	0.00906471
ANK1	OBSCN	3	6	311	10799	0.000447459	0.00906471
CTNNB1	HLA-A	3	3	10	6606	3.47e-09	2.1e-07
CTNNB1	BTRC	3	3	9	6606	2.53e-09	1.6e-07
PIK3CA	TNFSF13	3	9	94	9411	8e-05	0.00281849
RANBP2	IPO5	3	4	483	12302	0.00023496	0.00601268
RANBP2	DHX15	3	4	483	12302	0.00023496	0.00601268
RANBP2	CHMP2A	3	4	483	12302	0.00023496	0.00601268
RANBP2	PRKN	3	4	483	12302	0.00023496	0.00601268
RANBP2	SNRNP200	3	4	483	12302	0.00023496	0.00601268
RANBP2	ERBB2	3	4	483	12302	0.00023496	0.00601268
RANBP2	TP53	3	4	483	12302	0.00023496	0.00601268
RANBP2	RPLP0	3	4	483	12302	0.00023496	0.00601268
RANBP2	TUBB	3	4	483	12302	0.00023496	0.00601268
RANBP2	HNRNPC	3	4	483	12302	0.00023496	0.00601268
RANBP2	TOP2A	3	4	483	12302	0.00023496	0.00601268
RANBP2	M6PR	3	4	483	12302	0.00023496	0.00601268
RANBP2	FLNA	3	4	483	12302	0.00023496	0.00601268
RANBP2	TAF1	3	4	483	12302	0.00023496	0.00601268
RANBP2	UQCRC2	3	4	483	12302	0.00023496	0.00601268
RANBP2	APC	3	4	483	12302	0.00023496	0.00601268
RANBP2	LRPAP1	3	4	483	12302	0.00023496	0.00601268
RANBP2	HNRNPH1	3	4	483	12302	0.00023496	0.00601268
RANBP2	HSPA1L	3	4	483	12302	0.00023496	0.00601268
RANBP2	WAS	3	4	483	12302	0.00023496	0.00601268
RANBP2	RANGAP1	3	4	483	12302	0.00023496	0.00601268
RANBP2	KPNA2	3	4	483	12302	0.00023496	0.00601268
RANBP2	HNRNPF	3	4	483	12302	0.00023496	0.00601268
RANBP2	HDAC4	3	4	483	12302	0.00023496	0.00601268
RANBP2	RPS14	3	4	483	12302	0.00023496	0.00601268
RANBP2	EEF1A1	3	4	483	12302	0.00023496	0.00601268
RANBP2	PRKDC	3	4	483	12302	0.00023496	0.00601268
RANBP2	CLTC	3	4	483	12302	0.00023496	0.00601268
RANBP2	DHX9	3	4	483	12302	0.00023496	0.00601268
RANBP2	AKAP13	3	4	483	12302	0.00023496	0.00601268
RANBP2	CUL1	3	4	483	12302	0.00023496	0.00601268
RANBP2	MYBPC2	3	4	483	12302	0.00023496	0.00601268
RANBP2	KPNB1	3	4	483	12302	0.00023496	0.00601268
RANBP2	EFTUD2	3	4	483	12302	0.00023496	0.00601268
RANBP2	RRS1	3	4	483	12302	0.00023496	0.00601268
RANBP2	PTGES3	3	4	483	12302	0.00023496	0.00601268
RANBP2	SMU1	3	4	483	12302	0.00023496	0.00601268
RANBP2	ARID4B	3	4	483	12302	0.00023496	0.00601268
RANBP2	PDLIM3	3	4	483	12302	0.00023496	0.00601268
RANBP2	CDCA8	3	4	483	12302	0.00023496	0.00601268
RANBP2	HNRNPK	3	4	483	12302	0.00023496	0.00601268
RANBP2	PRPF8	3	4	483	12302	0.00023496	0.00601268
RANBP2	FLJ00340	3	4	483	12302	0.00023496	0.00601268
RANBP2	SRRM1	3	4	483	12302	0.00023496	0.00601268
RANBP2	AHCTF1	3	4	483	12302	0.00023496	0.00601268
RANBP2	DDX17	3	4	483	12302	0.00023496	0.00601268
RANBP2	IFT140	3	4	483	12302	0.00023496	0.00601268
RANBP2	TRIM55	3	4	483	12302	0.00023496	0.00601268
RANBP2	UBTD1	3	4	483	12302	0.00023496	0.00601268
RANBP2	SENP1	3	4	483	12302	0.00023496	0.00601268
RANBP2	UBA2	3	4	483	12302	0.00023496	0.00601268
RANBP2	NXF1	3	4	483	12302	0.00023496	0.00601268
RANBP2	MED13	3	4	483	12302	0.00023496	0.00601268
RANBP2	CSA2	3	4	483	12302	0.00023496	0.00601268
RANBP2	RALY	3	4	483	12302	0.00023496	0.00601268
RANBP2	RRP7A	3	4	483	12302	0.00023496	0.00601268
RANBP2	CERT1	3	4	483	12302	0.00023496	0.00601268
RANBP2	FHOD1	3	4	483	12302	0.00023496	0.00601268
RANBP2	HEL-S-70	3	4	483	12302	0.00023496	0.00601268
IL1RL1	CLEC7A	3	4	116	5746	3.24e-05	0.00128859
DNM1	SNRPA1	3	4	242	5585	0.000314839	0.00723837
DNM1	SUMO1	3	4	246	5585	0.000330527	0.00744891
DNM1	RPE	3	4	236	5585	0.00029224	0.00676073
REG3A	REG3A	3	3	62	1580	6.04e-05	0.0021696
CNTN1	PROP1	3	4	119	7492	1.58e-05	0.000717901
CNTN1	PTPRB	3	4	119	7492	1.58e-05	0.000717901
CNTN1	SCNN1B	3	4	119	7492	1.58e-05	0.000717901
CNTN1	PPP1CA	3	4	119	7492	1.58e-05	0.000717901
CNTN1	MAPK6	3	4	119	7492	1.58e-05	0.000717901
CNTN1	TNR	3	4	119	7492	1.58e-05	0.000717901
GRM7	CALM1	3	5	219	8209	0.000182355	0.00569174
KIF4B	TARDBP	3	5	116	4426	0.000173025	0.00561872
ACSM5	EP300	3	3	81	3963	8.54e-06	0.000398169
LILRB2	LILRB2	3	4	99	3810	6.88e-05	0.00244692
TNR	MAGEB4	3	8	135	12960	6.09e-05	0.0021696
TNR	NCK2	3	8	135	12960	6.09e-05	0.0021696
TNR	PSMA1	3	8	135	12960	6.09e-05	0.0021696
TNR	CNTN1	3	8	135	12960	6.09e-05	0.0021696
TNR	CCDC146	3	8	135	12960	6.09e-05	0.0021696
TNR	LGALS14	3	8	135	12960	6.09e-05	0.0021696
TNR	POLR3C	3	8	135	12960	6.09e-05	0.0021696
PSMD11	PSMA7	2	2	76	7200	0.00011142	0.00376365
PSMD11	PSMD3	2	2	130	7200	0.000326003	0.00738958
PSMD11	PSMD10	2	2	76	7200	0.00011142	0.00376365
PSMD11	ELP1	2	2	130	7200	0.000326003	0.00738958
PSMD11	FN1	2	2	130	7200	0.000326003	0.00738958
PSMD11	PSMA1	2	2	77	7200	0.000114371	0.00385457
PSMD11	PSMA5	2	2	82	7200	0.000129707	0.0043223
PSMD11	RPS21	2	2	78	7200	0.000117361	0.00394637
PSMD11	NFKB2	2	2	130	7200	0.000326003	0.00738958
PSMD11	USP4	2	2	130	7200	0.000326003	0.00738958
PSMD11	PSMD2	2	2	130	7200	0.000326003	0.00738958
PSMD11	ECPAS	2	2	130	7200	0.000326003	0.00738958
PSMD11	DKFZp686I0746	2	2	130	7200	0.000326003	0.00738958
PSMD11	NLRP9	2	2	130	7200	0.000326003	0.00738958
PSMD11	MCFD2	2	2	80	7200	0.000123457	0.00412329
PSMD11	PSMB7	2	2	75	7200	0.000108507	0.00368204
PPP1R12A	IL16	2	2	200	12490	0.00025641	0.00601268
KLF4	HUWE1	2	2	43	3539	0.00014763	0.00487575
KLF4	SETD7	2	2	39	3539	0.000121442	0.00406515
KLF4	CREBBP	2	2	43	3539	0.00014763	0.00487575
EPB41L2	ACTB	2	2	158	10247	0.00023775	0.00601268
AIFM1	STC2	2	3	32	3306	0.000279257	0.0064806
AIFM1	XIAP	2	3	35	3306	0.000333869	0.0075128
CHEK2	DAPK3	2	2	96	4145	0.000536406	0.00996787
CHEK2	NBN	2	2	80	4145	0.000372504	0.00810812
CHEK2	DIRAS3	2	2	93	4145	0.000503404	0.0094136
CHEK2	HOXC6	2	2	73	4145	0.000310168	0.00714205
CHEK2	SLC25A6	2	2	91	4145	0.000481985	0.00938553
CHEK2	PKM	2	2	88	4145	0.00045073	0.00906939
CHEK2	XRCC1	2	2	72	4145	0.000301728	0.00695852
CHEK2	VHL	2	2	94	4145	0.000514288	0.00959293
CHEK2	KPNA2	2	2	93	4145	0.000503404	0.0094136
CHEK2	PPP2R2B	2	2	96	4145	0.000536406	0.00996787
CHEK2	LRATD2	2	2	75	4145	0.000327396	0.00738958
CHEK2	RCHY1	2	2	87	4145	0.000440544	0.00898079
CHEK2	RHOBTB2	2	2	75	4145	0.000327396	0.00738958
CHEK2	PLK3	2	2	41	4145	9.78e-05	0.00334303
CHEK2	AATF	2	2	75	4145	0.000327396	0.00738958
CHEK2	HEL-S-283	2	2	80	4145	0.000372504	0.00810812
EGFR	PDGFRA	2	4	19	12961	1.29e-05	0.00059821
GFAP	VIM	2	2	61	6086	0.000100461	0.00342467
GFAP	HEL113	2	2	59	6086	9.4e-05	0.00322603
BRAF	TIMM50	2	3	97	10380	0.000260349	0.00605128
HIVEP1	HSPA1B	2	2	127	10975	0.000133905	0.00445221
PSMA4	GOLGA2	2	2	84	3839	0.000478765	0.00934159
PSMA4	PSME4	2	2	85	3839	0.000490232	0.00938553
PSMA4	CCAR2	2	2	85	3839	0.000490232	0.00938553
PSMA4	USP9X	2	2	85	3839	0.000490232	0.00938553
PSMA4	WDR11	2	2	85	3839	0.000490232	0.00938553
PSMA4	HEL-S-61	2	2	85	3839	0.000490232	0.00938553
RPS5	CLGN	2	2	76	3617	0.000441499	0.00898079
RPS5	RPLP1	2	2	75	3617	0.000429957	0.00880641
RPS5	RPLP2	2	2	72	3617	0.000396249	0.00844249
RPS5	RPLP0	2	2	78	3617	0.000465042	0.00917036
RPS5	RPSA	2	2	77	3617	0.000453194	0.00906939
RPS5	MRPL3	2	2	71	3617	0.000385318	0.00828099
RPS5	SNRPA1	2	2	77	3617	0.000453194	0.00906939
RPS5	EEF2	2	2	78	3617	0.000465042	0.00917036
RPS5	RPS2	2	2	75	3617	0.000429957	0.00880641
RPS5	RPL35A	2	2	78	3617	0.000465042	0.00917036
RPS5	RPL7	2	2	75	3617	0.000429957	0.00880641
RPS5	RPL17	2	2	79	3617	0.000477043	0.00932024
RPS5	POLR2E	2	2	81	3617	0.000501502	0.00940174
RPS5	ATP6V1B2	2	2	78	3617	0.000465042	0.00917036
RPS5	FBL	2	2	77	3617	0.000453194	0.00906939
RPS5	RPS12	2	2	74	3617	0.000418568	0.0087054
RPS5	RPL13	2	2	74	3617	0.000418568	0.0087054
RPS5	RPL10	2	2	78	3617	0.000465042	0.00917036
RPS5	CANX	2	2	75	3617	0.000429957	0.00880641
RPS5	RPL12	2	2	70	3617	0.000374541	0.00810812
RPS5	RPL9	2	2	77	3617	0.000453194	0.00906939
RPS5	RPL22	2	2	71	3617	0.000385318	0.00828099
RPS5	RPL4	2	2	74	3617	0.000418568	0.0087054
RPS5	RPS19	2	2	73	3617	0.000407332	0.00861673
RPS5	RPL3	2	2	79	3617	0.000477043	0.00932024
RPS5	RPL13A	2	2	70	3617	0.000374541	0.00810812
RPS5	RPL27A	2	2	75	3617	0.000429957	0.00880641
RPS5	RPL5	2	2	79	3617	0.000477043	0.00932024
RPS5	RPS9	2	2	74	3617	0.000418568	0.0087054
RPS5	RPS10	2	2	75	3617	0.000429957	0.00880641
RPS5	TUFM	2	2	75	3617	0.000429957	0.00880641
RPS5	RPL14	2	2	70	3617	0.000374541	0.00810812
RPS5	SLC25A1	2	2	74	3617	0.000418568	0.0087054
RPS5	EIF6	2	2	74	3617	0.000418568	0.0087054
RPS5	RPS20	2	2	74	3617	0.000418568	0.0087054
RPS5	RPS3A	2	2	73	3617	0.000407332	0.00861673
RPS5	RPL26	2	2	72	3617	0.000396249	0.00844249
RPS5	RPL37A	2	2	75	3617	0.000429957	0.00880641
RPS5	SEC61A1	2	2	79	3617	0.000477043	0.00932024
RPS5	RPS7	2	2	78	3617	0.000465042	0.00917036
RPS5	RPS8	2	2	77	3617	0.000453194	0.00906939
RPS5	RPS15A	2	2	77	3617	0.000453194	0.00906939
RPS5	RPS16	2	2	73	3617	0.000407332	0.00861673
RPS5	RPS14	2	2	78	3617	0.000465042	0.00917036
RPS5	RPS18	2	2	74	3617	0.000418568	0.0087054
RPS5	RPS13	2	2	73	3617	0.000407332	0.00861673
RPS5	RPS4X	2	2	75	3617	0.000429957	0.00880641
RPS5	RPL23A	2	2	70	3617	0.000374541	0.00810812
RPS5	RPS6	2	2	74	3617	0.000418568	0.0087054
RPS5	RPL23	2	2	74	3617	0.000418568	0.0087054
RPS5	RPS15	2	2	72	3617	0.000396249	0.00844249
RPS5	RPS26	2	2	74	3617	0.000418568	0.0087054
RPS5	RPL10A	2	2	75	3617	0.000429957	0.00880641
RPS5	RPL11	2	2	80	3617	0.000489196	0.00938553
RPS5	RPS27A	2	2	72	3617	0.000396249	0.00844249
RPS5	RPL38	2	2	78	3617	0.000465042	0.00917036
RPS5	RPS21	2	2	79	3617	0.000477043	0.00932024
RPS5	RACK1	2	2	74	3617	0.000418568	0.0087054
RPS5	EEF1A1	2	2	79	3617	0.000477043	0.00932024
RPS5	RPL19	2	2	78	3617	0.000465042	0.00917036
RPS5	RPL18A	2	2	73	3617	0.000407332	0.00861673
RPS5	RPL18	2	2	78	3617	0.000465042	0.00917036
RPS5	DKFZp686J08252	2	2	55	3617	0.000231222	0.00601268
RPS5	DNCL1	2	2	77	3617	0.000453194	0.00906939
RPS5	NHP2L1	2	2	80	3617	0.000489196	0.00938553
RPS5	GFM2	2	2	75	3617	0.000429957	0.00880641
RPS5	MRPL24	2	2	72	3617	0.000396249	0.00844249
RPS5	RPL10L	2	2	76	3617	0.000441499	0.00898079
RPS5	EIF2A	2	2	70	3617	0.000374541	0.00810812
RPS5	PNO1	2	2	71	3617	0.000385318	0.00828099
RPS5	MRPL11	2	2	78	3617	0.000465042	0.00917036
RPS5	RPL36	2	2	69	3617	0.000363916	0.00795946
RPS5	HBS1L	2	2	80	3617	0.000489196	0.00938553
RPS5	HEL-S-310	2	2	72	3617	0.000396249	0.00844249
UBE2A	UBA1	2	3	40	3251	0.000450433	0.00906939
RPS6KA3	RASAL1	2	2	208	9302	0.000500005	0.00938553
RPS6KA3	ESR1	2	2	208	9302	0.000500005	0.00938553
RPS6KA3	KRT18	2	2	208	9302	0.000500005	0.00938553
RPS6KA3	HSP90AB1	2	2	208	9302	0.000500005	0.00938553
RPS6KA3	MAPT	2	2	208	9302	0.000500005	0.00938553
RPS6KA3	FGFR1	2	2	208	9302	0.000500005	0.00938553
RPS6KA3	CREB1	2	2	208	9302	0.000500005	0.00938553
RPS6KA3	HNRNPH1	2	2	208	9302	0.000500005	0.00938553
RPS6KA3	NEDD4	2	2	208	9302	0.000500005	0.00938553
RPS6KA3	MASP1	2	2	208	9302	0.000500005	0.00938553
RPS6KA3	SMS	2	2	208	9302	0.000500005	0.00938553
RPS6KA3	CSE1L	2	2	208	9302	0.000500005	0.00938553
RPS6KA3	NPEPPS	2	2	208	9302	0.000500005	0.00938553
RPS6KA3	MAGI1	2	2	208	9302	0.000500005	0.00938553
RPS6KA3	EIF3C	2	2	208	9302	0.000500005	0.00938553
RPS6KA3	BARX1	2	2	208	9302	0.000500005	0.00938553
RPS6KA3	GDA	2	2	208	9302	0.000500005	0.00938553
RPS6KA3	SHANK1	2	2	208	9302	0.000500005	0.00938553
RPS6KA3	HEL-S-72p	2	2	208	9302	0.000500005	0.00938553
RPS6KA3	HEL-S-94n	2	2	208	9302	0.000500005	0.00938553
RPS6KA3	HEL-S-45	2	2	208	9302	0.000500005	0.00938553
GNGT1	GNB5	2	2	44	2361	0.000347307	0.00780335
GNGT1	ZNF277	2	2	45	2361	0.000363273	0.00795713
ATM	AP3B1	2	5	114	22317	0.000258283	0.00601268
ATM	CHEK1	2	5	114	22317	0.000258283	0.00601268
ATM	CRX	2	5	114	22317	0.000258283	0.00601268
ATM	NBN	2	5	114	22317	0.000258283	0.00601268
ATM	RNF40	2	5	114	22317	0.000258283	0.00601268
ATM	ZNF821	2	5	114	22317	0.000258283	0.00601268
ATM	RAD17	2	5	114	22317	0.000258283	0.00601268
ATM	RNF8	2	5	114	22317	0.000258283	0.00601268
ATM	ACTL6B	2	5	114	22317	0.000258283	0.00601268
ATM	BCL10	2	5	114	22317	0.000258283	0.00601268
ATM	CHEK2	2	5	114	22317	0.000258283	0.00601268
ATM	ABL1	2	5	114	22317	0.000258283	0.00601268
ATM	MT-ND4	2	5	114	22317	0.000258283	0.00601268
ATM	TFF1	2	5	114	22317	0.000258283	0.00601268
ATM	TP53	2	5	114	22317	0.000258283	0.00601268
ATM	HSPA8	2	5	114	22317	0.000258283	0.00601268
ATM	NAT2	2	5	114	22317	0.000258283	0.00601268
ATM	ATF2	2	5	114	22317	0.000258283	0.00601268
ATM	UCHL3	2	5	114	22317	0.000258283	0.00601268
ATM	RPA2	2	5	114	22317	0.000258283	0.00601268
ATM	H2AX	2	5	114	22317	0.000258283	0.00601268
ATM	CREB1	2	5	114	22317	0.000258283	0.00601268
ATM	NR4A1	2	5	114	22317	0.000258283	0.00601268
ATM	FECH	2	5	114	22317	0.000258283	0.00601268
ATM	XPA	2	5	114	22317	0.000258283	0.00601268
ATM	POLR2A	2	5	114	22317	0.000258283	0.00601268
ATM	RPA1	2	5	114	22317	0.000258283	0.00601268
ATM	HLA-A	2	5	114	22317	0.000258283	0.00601268
ATM	RFC1	2	5	114	22317	0.000258283	0.00601268
ATM	PPP1CC	2	5	114	22317	0.000258283	0.00601268
ATM	ZEB1	2	5	114	22317	0.000258283	0.00601268
ATM	BRCA1	2	5	114	22317	0.000258283	0.00601268
ATM	MLH1	2	5	114	22317	0.000258283	0.00601268
ATM	MSH2	2	5	114	22317	0.000258283	0.00601268
ATM	CSNK1D	2	5	114	22317	0.000258283	0.00601268
ATM	MCM2	2	5	114	22317	0.000258283	0.00601268
ATM	LIG4	2	5	114	22317	0.000258283	0.00601268
ATM	MRE11	2	5	114	22317	0.000258283	0.00601268
ATM	PEX5	2	5	114	22317	0.000258283	0.00601268
ATM	MSH6	2	5	114	22317	0.000258283	0.00601268
ATM	BLM	2	5	114	22317	0.000258283	0.00601268
ATM	TERF1	2	5	114	22317	0.000258283	0.00601268
ATM	BID	2	5	114	22317	0.000258283	0.00601268
ATM	PPP1CA	2	5	114	22317	0.000258283	0.00601268
ATM	AP2B1	2	5	114	22317	0.000258283	0.00601268
ATM	MDM2	2	5	114	22317	0.000258283	0.00601268
ATM	E2F1	2	5	114	22317	0.000258283	0.00601268
ATM	AP1B1	2	5	114	22317	0.000258283	0.00601268
ATM	TP53BP1	2	5	114	22317	0.000258283	0.00601268
ATM	IL24	2	5	114	22317	0.000258283	0.00601268
ATM	ATM	2	5	114	22317	0.000258283	0.00601268
ATM	PPP2R5C	2	5	114	22317	0.000258283	0.00601268
ATM	AP3B2	2	5	114	22317	0.000258283	0.00601268
ATM	ATR	2	5	114	22317	0.000258283	0.00601268
ATM	EIF4EBP1	2	5	114	22317	0.000258283	0.00601268
ATM	WRN	2	5	114	22317	0.000258283	0.00601268
ATM	ESPL1	2	5	114	22317	0.000258283	0.00601268
ATM	MDC1	2	5	114	22317	0.000258283	0.00601268
ATM	SMC1A	2	5	114	22317	0.000258283	0.00601268
ATM	CHD4	2	5	114	22317	0.000258283	0.00601268
ATM	STK11	2	5	114	22317	0.000258283	0.00601268
ATM	NREP	2	5	114	22317	0.000258283	0.00601268
ATM	HIF1A	2	5	114	22317	0.000258283	0.00601268
ATM	RNF20	2	5	114	22317	0.000258283	0.00601268
ATM	FBXO31	2	5	114	22317	0.000258283	0.00601268
ATM	MAP1S	2	5	114	22317	0.000258283	0.00601268
ATM	DKFZp686P18130	2	5	114	22317	0.000258283	0.00601268
ATM	RRM2B	2	5	114	22317	0.000258283	0.00601268
ATM	DYRK2	2	5	114	22317	0.000258283	0.00601268
ATM	RAD50	2	5	114	22317	0.000258283	0.00601268
ATM	SPSB1	2	5	114	22317	0.000258283	0.00601268
ATM	RANBP9	2	5	114	22317	0.000258283	0.00601268
ATM	DCLRE1C	2	5	114	22317	0.000258283	0.00601268
ATM	RAD9A	2	5	114	22317	0.000258283	0.00601268
ATM	NABP2	2	5	114	22317	0.000258283	0.00601268
ATM	MTA3	2	5	114	22317	0.000258283	0.00601268
ATM	FANCD2	2	5	114	22317	0.000258283	0.00601268
ATM	NSD3	2	5	114	22317	0.000258283	0.00601268
ATM	BCAS3	2	5	114	22317	0.000258283	0.00601268
ATM	KAT8	2	5	114	22317	0.000258283	0.00601268
ATM	RASSF1	2	5	114	22317	0.000258283	0.00601268
ATM	DKFZp761H172	2	5	114	22317	0.000258283	0.00601268
ATM	TDP1	2	5	114	22317	0.000258283	0.00601268
ATM	AATF	2	5	114	22317	0.000258283	0.00601268
ATM	DAXX	2	5	114	22317	0.000258283	0.00601268
ATM	ERRFI1	2	5	114	22317	0.000258283	0.00601268
ATM	OSGIN1	2	5	114	22317	0.000258283	0.00601268
ATM	DCAF1	2	5	114	22317	0.000258283	0.00601268
ATM	IKBKG	2	5	114	22317	0.000258283	0.00601268
ATM	HEL-S-72p	2	5	114	22317	0.000258283	0.00601268
GAB1	PTPN11	2	3	9	10119	2.37e-06	0.000118024
KEAP1	BCL2	2	5	25	3761	0.000436004	0.00890564
KEAP1	NUDCD3	2	5	25	3761	0.000436004	0.00890564
KEAP1	TRIM15	2	5	26	3761	0.00047133	0.00928201
KEAP1	CACYBP	2	5	27	3761	0.000508012	0.0094878
DPYSL3	JUP	2	3	55	7164	0.000175917	0.00564647
DPYSL3	ST13	2	3	61	7164	0.000216271	0.00601268
DLG2	DLGAP1	2	2	305	16089	0.00035937	0.00788328
DLG2	GRID2	2	2	305	16089	0.00035937	0.00788328
DLG2	FZD7	2	2	305	16089	0.00035937	0.00788328
DLG2	ATP2B4	2	2	305	16089	0.00035937	0.00788328
DLG2	FASLG	2	2	305	16089	0.00035937	0.00788328
DLG2	WNT3A	2	2	305	16089	0.00035937	0.00788328
DLG2	KCNJ2	2	2	140	16089	7.57e-05	0.00267976
DLG2	LRP2	2	2	305	16089	0.00035937	0.00788328
DLG2	ATP2B2	2	2	305	16089	0.00035937	0.00788328
DLG2	ERBB4	2	2	305	16089	0.00035937	0.00788328
DLG2	NLGN1	2	2	305	16089	0.00035937	0.00788328
DLG2	NLGN2	2	2	305	16089	0.00035937	0.00788328
DLG2	SEMA4C	2	2	305	16089	0.00035937	0.00788328
DLG2	NLGN3	2	2	305	16089	0.00035937	0.00788328
DLG2	GRID1	2	2	305	16089	0.00035937	0.00788328
DLG2	FZD4	2	2	305	16089	0.00035937	0.00788328
DLG2	FZD1	2	2	305	16089	0.00035937	0.00788328
STK11	SPDEF	2	4	38	8504	0.000119092	0.00399549
STK11	XPA	2	4	50	8504	0.000205795	0.00601268
STK11	STIP1	2	4	41	8504	0.000138572	0.00459707
STK11	MLF1	2	4	50	8504	0.000205795	0.00601268
STK11	VPS72	2	4	46	8504	0.000174294	0.00561872
STK11	STRADA	2	4	32	8504	8.45e-05	0.00294256
STK11	PLD3	2	4	46	8504	0.000174294	0.00561872
STK11	D2HGDH	2	4	68	8504	0.000379561	0.00819288
STK11	ERLEC1	2	4	47	8504	0.000181926	0.00569174
STK11	TSG101	2	4	45	8504	0.000166825	0.00543702
STK11	FAIM2	2	4	46	8504	0.000174294	0.00561872
STK11	STRADB	2	4	60	8504	0.000295878	0.00683424
STK11	STUB1	2	4	46	8504	0.000174294	0.00561872
STK11	HEL117	2	4	47	8504	0.000181926	0.00569174
HSD17B12	IPO5	2	2	132	8600	0.000235587	0.00601268
HSD17B12	SCD	2	2	63	8600	5.37e-05	0.00197957
HSD17B12	AHSA1	2	2	39	8600	2.06e-05	0.000883945
HSD17B12	RPN1	2	2	80	8600	8.65e-05	0.00299115
HSD17B12	ATP1A1	2	2	132	8600	0.000235587	0.00601268
HSD17B12	ATP1B1	2	2	62	8600	5.2e-05	0.00193649
HSD17B12	CYC1	2	2	67	8600	6.07e-05	0.0021696
HSD17B12	ETFA	2	2	62	8600	5.2e-05	0.00193649
HSD17B12	UQCRC2	2	2	65	8600	5.71e-05	0.00208827
HSD17B12	WARS1	2	2	57	8600	4.39e-05	0.00173713
HSD17B12	PPP2R1A	2	2	51	8600	3.52e-05	0.00139439
HSD17B12	FASN	2	2	132	8600	0.000235587	0.00601268
HSD17B12	COPB1	2	2	80	8600	8.65e-05	0.00299115
HSD17B12	RAB1A	2	2	65	8600	5.71e-05	0.00208827
HSD17B12	RNP24	2	2	45	8600	2.74e-05	0.00115673
HSD17B12	DKFZp686J11229	2	2	80	8600	8.65e-05	0.00299115
HSD17B12	RAB1B	2	2	59	8600	4.71e-05	0.00184641
HSD17B12	TOMM22	2	2	42	8600	2.39e-05	0.00101633
HSD17B12	TECR	2	2	38	8600	1.95e-05	0.000844089
HSD17B12	TMCO1	2	2	42	8600	2.39e-05	0.00101633
HSD17B12	UBQLN1	2	2	85	8600	9.77e-05	0.00334303
HSD17B12	SSR3	2	2	40	8600	2.16e-05	0.000927169
HSD17B12	RPL36	2	2	66	8600	5.89e-05	0.0021459
HSD17B12	AFG3L2	2	2	58	8600	4.55e-05	0.00179384
HSD17B12	HEL-S-125m	2	2	65	8600	5.71e-05	0.00208827
EZH1	EED	2	2	117	6992	0.000280007	0.00648785
DCPS	PPP5C	2	2	65	3352	0.000376027	0.00812843
RBM41	HNRNPC	2	2	54	6105	7.82e-05	0.00276235
RBM41	RAC3	2	2	55	6105	8.12e-05	0.00283189
RBM41	TRAF2	2	2	53	6105	7.54e-05	0.00267372
RBM41	TRAF1	2	2	58	6105	9.03e-05	0.00310541
RBM41	CCDC85B	2	2	55	6105	8.12e-05	0.00283189
RBM41	RALYL	2	2	55	6105	8.12e-05	0.00283189
RBM41	MIPOL1	2	2	57	6105	8.72e-05	0.00300623
RBM41	TRIM54	2	2	55	6105	8.12e-05	0.00283189
SPTBN4	PFDN1	2	2	158	11677	0.000183085	0.00569174
SPTBN4	GADD45A	2	2	158	11677	0.000183085	0.00569174
SPTBN4	CLK1	2	2	158	11677	0.000183085	0.00569174
SPTBN4	GSK3B	2	2	158	11677	0.000183085	0.00569174
SPTBN4	NEK2	2	2	158	11677	0.000183085	0.00569174
SPTBN4	CDC37	2	2	158	11677	0.000183085	0.00569174
SPTBN4	PTPRN	2	2	158	11677	0.000183085	0.00569174
SPTBN4	CENPU	2	2	158	11677	0.000183085	0.00569174
SPTBN4	PTPRN2	2	2	158	11677	0.000183085	0.00569174
SPTBN4	DISC1	2	2	158	11677	0.000183085	0.00569174
SPTBN4	CELSR3	2	2	158	11677	0.000183085	0.00569174
SPTBN4	RPS6KA6	2	2	158	11677	0.000183085	0.00569174
GAN	HSP90AB1	2	3	111	15406	0.000154987	0.00508475
GAN	UBA1	2	3	111	15406	0.000154987	0.00508475
GAN	MAP1B	2	3	111	15406	0.000154987	0.00508475
ZBTB3	SUPT5H	2	2	19	3348	3.22e-05	0.00128382
ZBTB3	BIN1	2	2	19	3348	3.22e-05	0.00128382
ZBTB3	IRF6	2	2	19	3348	3.22e-05	0.00128382
ZBTB3	EIF5B	2	2	19	3348	3.22e-05	0.00128382
ZBTB3	NR3C1	2	2	19	3348	3.22e-05	0.00128382
ZBTB3	THRA	2	2	19	3348	3.22e-05	0.00128382
ZBTB3	SKIL	2	2	19	3348	3.22e-05	0.00128382
ZBTB3	PPARG	2	2	19	3348	3.22e-05	0.00128382
ZBTB3	GATA4	2	2	19	3348	3.22e-05	0.00128382
ZBTB3	PKNOX1	2	2	19	3348	3.22e-05	0.00128382
ZBTB3	SMAD3	2	2	19	3348	3.22e-05	0.00128382
ZBTB3	FOXM1	2	2	19	3348	3.22e-05	0.00128382
ZBTB3	PROX1	2	2	19	3348	3.22e-05	0.00128382
ZBTB3	SSX3	2	2	19	3348	3.22e-05	0.00128382
ZBTB3	ANKRD2	2	2	19	3348	3.22e-05	0.00128382
ZBTB3	ZNF556	2	2	19	3348	3.22e-05	0.00128382
ZBTB3	JADE2	2	2	19	3348	3.22e-05	0.00128382
ZBTB3	ZMYM2	2	2	19	3348	3.22e-05	0.00128382
ZBTB3	LEF1	2	2	19	3348	3.22e-05	0.00128382
ZBTB3	GTF2A1L	2	2	19	3348	3.22e-05	0.00128382
ZBTB3	IKBKG	2	2	19	3348	3.22e-05	0.00128382
RBM12	SDHAF2	2	2	153	6702	0.000521164	0.00970896
EHD3	EHD1	2	2	72	4959	0.000210803	0.00601268
EPB41L3	ACTB	2	2	176	10975	0.000257168	0.00601268
SNX24	YWHAZ	2	2	45	3550	0.000160682	0.00525995
SNX24	SH3GL3	2	2	47	3550	0.000175283	0.00563832
STON1	SRPK2	2	4	25	8082	5.72e-05	0.00208827

## Sheet: S9d
Gene1	Gene2	k	n	M	N	P	FDR
UBA6	UBE2L6	3	8	142	11432	0.000102421	0.00166931
UBA6	AHCYL1	3	8	309	11432	0.000998502	0.00872285
UBA6	ATG7	3	8	309	11432	0.000998502	0.00872285
UBA6	OXSR1	3	8	309	11432	0.000998502	0.00872285
UBA6	HEXA	3	8	309	11432	0.000998502	0.00872285
UBA6	PYGB	3	8	309	11432	0.000998502	0.00872285
UBA6	IMPDH2	3	8	309	11432	0.000998502	0.00872285
UBA6	UCHL3	3	8	309	11432	0.000998502	0.00872285
UBA6	CTPS1	3	8	309	11432	0.000998502	0.00872285
UBA6	GNPDA1	3	8	309	11432	0.000998502	0.00872285
UBA6	SMS	3	8	309	11432	0.000998502	0.00872285
UBA6	PGGT1B	3	8	309	11432	0.000998502	0.00872285
UBA6	RAD23A	3	8	309	11432	0.000998502	0.00872285
UBA6	RAD23B	3	8	309	11432	0.000998502	0.00872285
UBA6	NPEPPS	3	8	309	11432	0.000998502	0.00872285
UBA6	UBE2D2	3	8	120	11432	6.23e-05	0.00111119
UBA6	PFKP	3	8	309	11432	0.000998502	0.00872285
UBA6	TSN	3	8	136	11432	9.02e-05	0.00148524
UBA6	VPS26B	3	8	309	11432	0.000998502	0.00872285
UBA6	NUP93	3	8	309	11432	0.000998502	0.00872285
UBA6	OGFOD1	3	8	309	11432	0.000998502	0.00872285
UBA6	PDCD6IP	3	8	309	11432	0.000998502	0.00872285
UBA6	TRNT1	3	8	309	11432	0.000998502	0.00872285
UBA6	EHD1	3	8	309	11432	0.000998502	0.00872285
UBA6	UBE2Z	3	8	320	11432	0.00110492	0.00941968
UBA6	XPNPEP1	3	8	309	11432	0.000998502	0.00872285
UBA6	CZIB	3	8	96	11432	3.21e-05	0.000649887
UBA6	MTRR	3	8	309	11432	0.000998502	0.00872285
UBA6	ENOPH1	3	8	111	11432	4.94e-05	0.000911828
UBA6	STRAP	3	8	123	11432	6.7e-05	0.00118938
UBA6	NUBP2	3	8	309	11432	0.000998502	0.00872285
GRM8	PIAS1	3	11	119	6439	0.000931829	0.00830051
GRM8	PIAS2	3	11	119	6439	0.000931829	0.00830051
GRM8	FLNA	3	11	119	6439	0.000931829	0.00830051
IGF2BP3	RPL37A	2	5	38	8511	0.000197571	0.00292914
E2F3	RYBP	1	1	4	4774	0.000837872	0.00769153
E2F3	FZR1	1	1	3	4774	0.000628404	0.00619932
WNT7A	STRN4	3	6	119	4579	0.000330939	0.00417497
PTPRT	PTPRN	4	19	254	12933	0.000455247	0.00504249
CTDSP2	POLR2A	2	2	94	5442	0.000298359	0.00396642
CTDSP2	CDCA3	2	2	81	5442	0.00022154	0.00322941
ABCD4	XRCC6	2	2	285	8769	0.00105631	0.0091066
ABCD4	PEA15	2	2	285	8769	0.00105631	0.0091066
POLR3A	POLR1C	5	7	559	8112	2.9e-05	0.000621006
POLR3A	POLR3G	4	7	412	8112	0.000205684	0.00301686
POLR3A	SMARCA5	4	7	412	8112	0.000205684	0.00301686
POLR3A	POLR3D	4	7	412	8112	0.000205684	0.00301686
POLR3A	HSP90AB1	5	7	559	8112	2.9e-05	0.000621006
POLR3A	POLR2E	5	7	559	8112	2.9e-05	0.000621006
POLR3A	POLR2A	5	7	559	8112	2.9e-05	0.000621006
POLR3A	POLR2B	5	7	559	8112	2.9e-05	0.000621006
POLR3A	RPS5	5	7	559	8112	2.9e-05	0.000621006
POLR3A	TUFM	5	7	559	8112	2.9e-05	0.000621006
POLR3A	SMARCA4	4	7	412	8112	0.000205684	0.00301686
POLR3A	POLR2H	5	7	559	8112	2.9e-05	0.000621006
POLR3A	PPP5C	5	7	559	8112	2.9e-05	0.000621006
POLR3A	PCBD1	5	7	553	8112	2.75e-05	0.000621006
POLR3A	EWSR1	4	7	411	8112	0.000203757	0.0030125
POLR3A	HDAC1	5	7	559	8112	2.9e-05	0.000621006
POLR3A	PTGES3	5	7	559	8112	2.9e-05	0.000621006
POLR3A	TSR1	4	7	412	8112	0.000205684	0.00301686
POLR3A	MRPL2	5	7	559	8112	2.9e-05	0.000621006
POLR3A	MRPL54	4	7	412	8112	0.000205684	0.00301686
POLR3A	NUDCD3	4	7	412	8112	0.000205684	0.00301686
POLR3A	HDAC2	5	7	559	8112	2.9e-05	0.000621006
POLR3A	MRPL24	5	7	559	8112	2.9e-05	0.000621006
POLR3A	IPO9	5	7	559	8112	2.9e-05	0.000621006
POLR3A	POLR3C	5	7	559	8112	2.9e-05	0.000621006
POLR3A	POLR3F	4	7	412	8112	0.000205684	0.00301686
POLR3A	RPAP3	4	7	412	8112	0.000205684	0.00301686
POLR3A	POLR1B	5	7	559	8112	2.9e-05	0.000621006
POLR3A	MRPL17	5	7	559	8112	2.9e-05	0.000621006
POLR3A	POLR3E	4	7	412	8112	0.000205684	0.00301686
POLR3A	POLR3B	5	7	559	8112	2.9e-05	0.000621006
POLR3A	MRPL22	4	7	412	8112	0.000205684	0.00301686
POLR3A	VPS18	4	7	412	8112	0.000205684	0.00301686
POLR3A	PFDN2	5	7	559	8112	2.9e-05	0.000621006
POLR3A	MRPS7	4	7	412	8112	0.000205684	0.00301686
POLR3A	POLR1D	5	7	559	8112	2.9e-05	0.000621006
POLR3A	POLR3K	5	7	559	8112	2.9e-05	0.000621006
POLR3A	MRPL11	5	7	559	8112	2.9e-05	0.000621006
POLR3A	POLR3H	5	7	559	8112	2.9e-05	0.000621006
POLR3A	GTF3C3	4	7	412	8112	0.000205684	0.00301686
POLR3A	IKBKG	4	7	411	8112	0.000203757	0.0030125
AIM2	CASP1	2	2	65	2009	0.00104681	0.00902956
AIM2	APPBP2	2	2	65	2009	0.00104681	0.00902956
AIM2	PYCARD	2	2	65	2009	0.00104681	0.00902956
GIPC1	OGT	2	2	58	4423	0.000171958	0.00259974
GIPC1	NTRK1	2	2	34	4423	5.91e-05	0.00107246
GIPC1	IGF1R	2	2	58	4423	0.000171958	0.00259974
GIPC1	ADRB1	2	2	55	4423	0.000154629	0.00238142
GIPC1	ITGA5	2	2	55	4423	0.000154629	0.00238142
GIPC1	BCR	2	2	58	4423	0.000171958	0.00259974
GIPC1	TYRP1	2	2	32	4423	5.23e-05	0.000961292
GIPC1	LHCGR	2	2	34	4423	5.91e-05	0.00107246
GIPC1	ITGA6	2	2	55	4423	0.000154629	0.00238142
GIPC1	SDC4	2	2	33	4423	5.57e-05	0.00101478
GIPC1	DDIT3	2	2	33	4423	5.57e-05	0.00101478
GIPC1	TGFBR3	2	2	58	4423	0.000171958	0.00259974
GIPC1	GFUS	2	2	36	4423	6.62e-05	0.00117763
GIPC1	TPBG	2	2	32	4423	5.23e-05	0.000961292
GIPC1	LRP8	2	2	58	4423	0.000171958	0.00259974
GIPC1	NTRK2	2	2	55	4423	0.000154629	0.00238142
GIPC1	GNAS	2	2	58	4423	0.000171958	0.00259974
GIPC1	ZFPM1	2	2	55	4423	0.000154629	0.00238142
GIPC1	ZNF408	2	2	55	4423	0.000154629	0.00238142
GIPC1	CD93	2	2	34	4423	5.91e-05	0.00107246
GIPC1	MYO6	2	2	55	4423	0.000154629	0.00238142
HAT1	UBE2A	2	3	62	6792	0.000248461	0.00350274
XPO1	IPO5	2	2	361	11708	0.000950712	0.00841278
XPO1	CAD	2	2	361	11708	0.000950712	0.00841278
XPO1	CSTF3	2	2	361	11708	0.000950712	0.00841278
XPO1	NDRG1	2	2	361	11708	0.000950712	0.00841278
XPO1	IPO9	2	2	361	11708	0.000950712	0.00841278
XPO1	SCPEP1	2	2	361	11708	0.000950712	0.00841278
ATP2A1	TULP3	3	3	354	4587	0.000459646	0.00504982
ATP2A1	APPL1	3	3	354	4587	0.000459646	0.00504982
SETD1A	WDR5	2	9	10	6903	7.5e-05	0.00130294
ABCC5	SMC2	2	7	41	11441	0.000266482	0.00365116
ABCC5	SERPINA3	2	7	41	11441	0.000266482	0.00365116
ABCC5	ESR1	2	7	41	11441	0.000266482	0.00365116
ABCC5	AK2	2	7	41	11441	0.000266482	0.00365116
ABCC5	RBP5	2	7	41	11441	0.000266482	0.00365116
MSH4	EIF3F	4	7	242	3266	0.000878751	0.00797348
MSH4	MSH4	6	7	368	3266	1.29e-05	0.000378665
MSH4	ABL1	4	7	242	3266	0.000878751	0.00797348
MSH4	MLH1	4	7	242	3266	0.000878751	0.00797348
MSH4	VBP1	4	7	131	3266	8.22e-05	0.00138421
MSH4	GPS2	4	7	242	3266	0.000878751	0.00797348
MAGEB4	MAGEA8	3	10	35	2237	0.000423242	0.00497267
FGF10	FGFR2	2	3	31	3011	0.000315814	0.0040704
RGS5	ADRB2	2	4	35	6812	0.000157311	0.00241944
MEFV	SIVA1	2	2	146	4819	0.000917893	0.00821505
MEFV	MEFV	2	2	146	4819	0.000917893	0.00821505
MEFV	PSTPIP1	2	2	100	4819	0.000430612	0.00503717
MEFV	YWHAQ	2	2	146	4819	0.000917893	0.00821505
MEFV	CASP1	2	2	90	4819	0.000348796	0.00433897
MEFV	PYCARD	2	2	149	4819	0.000956002	0.00845261
MEFV	COG5	2	2	146	4819	0.000917893	0.00821505
FLRT2	FLRT2	2	5	90	9163	0.000945926	0.00838428
FLRT2	FLRT1	2	5	90	9163	0.000945926	0.00838428
ADCY6	ATXN1	3	6	126	8412	6.5e-05	0.00115658
LDB2	LMO3	1	6	1	5586	0.00107363	0.00920059
CHP2	SLC9A3	2	2	76	2382	0.00101799	0.00887141
ST18	PSMC5	2	4	114	14396	0.00037229	0.00449733
GDF9	SAT1	2	2	10	3103	1.04e-05	0.000318677
NRP2	NRP2	2	6	56	11380	0.000358491	0.0044
CTNND1	PLPP3	3	6	77	8833	1.3e-05	0.000379423
CTNND1	CTNND1	3	6	254	8833	0.000445494	0.00504249
CTNND1	EGFR	3	6	273	8833	0.000550409	0.00580502
CTNND1	LCK	3	6	275	8833	0.000562303	0.00586886
CTNND1	FYN	3	6	275	8833	0.000562303	0.00586886
CTNND1	CDH1	2	6	31	8833	0.000183034	0.00275166
CTNND1	PTPRM	3	6	210	8833	0.000254654	0.00355576
CTNND1	PSEN1	3	6	273	8833	0.000550409	0.00580502
CTNND1	PTPRJ	3	6	216	8833	0.000276681	0.00375623
CTNND1	FRMD5	3	6	74	8833	1.15e-05	0.000344549
CTNND1	ZBTB33	3	6	216	8833	0.000276681	0.00375623
CTNND1	KCTD6	3	6	210	8833	0.000254654	0.00355576
CTNND1	COL17A1	3	6	216	8833	0.000276681	0.00375623
SH2D1A	SH2D1A	2	3	37	2450	0.000677326	0.0065447
USH2A	KRT18	7	78	387	20584	0.000683641	0.0065925
USH2A	BRCA1	7	78	387	20584	0.000683641	0.0065925
USH2A	USH1C	7	78	387	20584	0.000683641	0.0065925
PAK3	PAK3	3	10	49	10312	1.26e-05	0.000368434
PAK3	RAF1	5	10	139	10312	1.06e-07	6.44e-06
PAK3	ARHGEF7	5	10	138	10312	1.02e-07	6.24e-06
BCAS2	HNRNPA0	1	1	1	1299	0.000769823	0.00720046
KRT38	PIK3R2	2	4	17	2337	0.00031442	0.00405405
KRT38	HGS	2	4	17	2337	0.00031442	0.00405405
KRT38	MAGEB4	2	4	17	2337	0.00031442	0.00405405
KRT38	KDM1A	2	4	17	2337	0.00031442	0.00405405
KRT38	GLRX3	2	4	17	2337	0.00031442	0.00405405
KRT38	ZNF20	2	4	17	2337	0.00031442	0.00405405
KRT38	PSMA1	2	4	17	2337	0.00031442	0.00405405
KRT38	TXLNA	2	4	17	2337	0.00031442	0.00405405
KRT38	PTGER3	2	4	17	2337	0.00031442	0.00405405
KRT38	HOXA1	2	4	17	2337	0.00031442	0.00405405
KRT38	GNG10	2	4	17	2337	0.00031442	0.00405405
KRT38	HDAC4	2	4	17	2337	0.00031442	0.00405405
KRT38	PSMC5	2	4	17	2337	0.00031442	0.00405405
KRT38	BRME1	2	4	17	2337	0.00031442	0.00405405
KRT38	PIN1	2	4	17	2337	0.00031442	0.00405405
KRT38	KLHL38	2	4	17	2337	0.00031442	0.00405405
KRT38	TXLNB	4	4	17	2337	2.8e-09	3.31e-07
KRT38	FAM90A1	2	4	17	2337	0.00031442	0.00405405
KRT38	CCDC146	2	4	17	2337	0.00031442	0.00405405
KRT38	CEP57L1	2	4	17	2337	0.00031442	0.00405405
KRT38	USHBP1	2	4	17	2337	0.00031442	0.00405405
KRT38	TXNDC5	2	4	17	2337	0.00031442	0.00405405
KRT38	C1orf216	2	4	17	2337	0.00031442	0.00405405
KRT38	ZNF417	2	4	17	2337	0.00031442	0.00405405
KRT38	HAUS1	2	4	17	2337	0.00031442	0.00405405
KRT38	ANKRD36BP1	2	4	17	2337	0.00031442	0.00405405
KRT38	ZNF587	2	4	17	2337	0.00031442	0.00405405
KRT38	ZFYVE21	2	4	17	2337	0.00031442	0.00405405
KRT38	SCNM1	2	4	17	2337	0.00031442	0.00405405
KRT38	RHPN1-AS1	2	4	17	2337	0.00031442	0.00405405
KRT38	BEX2	2	4	17	2337	0.00031442	0.00405405
KRT38	HMG20B	2	4	17	2337	0.00031442	0.00405405
KRT38	CD300A	2	4	17	2337	0.00031442	0.00405405
KRT38	AMOTL2	2	4	17	2337	0.00031442	0.00405405
SOX30	AHCYL1	2	4	43	3471	0.000905689	0.00812392
SOX30	NUDT3	2	4	43	3471	0.000905689	0.00812392
SOX30	GNAI3	2	4	43	3471	0.000905689	0.00812392
SOX30	BRCA1	2	4	43	3471	0.000905689	0.00812392
SOX30	GP2	2	4	43	3471	0.000905689	0.00812392
SOX30	FLI1	2	4	43	3471	0.000905689	0.00812392
SOX30	TRAF2	2	4	43	3471	0.000905689	0.00812392
SOX30	BAMBI	2	4	43	3471	0.000905689	0.00812392
SOX30	DKFZp779K0533	2	4	43	3471	0.000905689	0.00812392
SOX30	FBXO38	2	4	43	3471	0.000905689	0.00812392
SOX30	PAXIP1	2	4	43	3471	0.000905689	0.00812392
SOX30	DCAF4	2	4	43	3471	0.000905689	0.00812392
SOX30	CUL5	2	4	43	3471	0.000905689	0.00812392
SOX30	KIFC3	2	4	43	3471	0.000905689	0.00812392
SOX30	DDX56	2	4	43	3471	0.000905689	0.00812392
KCNK2	KCNK2	4	12	131	3910	0.000502317	0.00540939
UNC5C	DAPK1	2	4	124	10684	0.000795762	0.0073596
TNKS	TNKS	2	5	105	14186	0.000539781	0.00571542
RASAL1	RRAGB	1	1	4	4813	0.000831082	0.00763139
KLF8	CTBP2	1	3	1	9022	0.000332484	0.00419281
POLR1A	POLR1C	4	5	496	13519	8.79e-06	0.000272695
POLR1A	ERBB2	3	5	322	13519	0.000130343	0.00205261
POLR1A	POLR2E	4	5	496	13519	8.79e-06	0.000272695
POLR1A	POLR2H	4	5	496	13519	8.79e-06	0.000272695
POLR1A	POLR2L	4	5	496	13519	8.79e-06	0.000272695
POLR1A	SSRP1	3	5	322	13519	0.000130343	0.00205261
POLR1A	POLR1B	4	5	496	13519	8.79e-06	0.000272695
POLR1A	POLR1D	4	5	496	13519	8.79e-06	0.000272695
POLR1A	SUPT16H	3	5	322	13519	0.000130343	0.00205261
CHEK2	PLK3	2	4	41	4145	0.000579329	0.00600951
ADH1B	SERPINA3	2	3	93	6483	0.000611451	0.00619094
GSR	PJA1	2	2	74	3232	0.000524229	0.00559682
EGFR	SH3D21	6	10	280	12961	1.98e-08	1.31e-06
EGFR	CALM3	6	10	280	12961	1.98e-08	1.31e-06
EGFR	RUTBC1	6	10	280	12961	1.98e-08	1.31e-06
EGFR	AIP	6	10	475	12961	4.48e-07	1.84e-05
EGFR	APBB1	6	10	280	12961	1.98e-08	1.31e-06
EGFR	WASL	6	10	280	12961	1.98e-08	1.31e-06
EGFR	PIK3R2	6	10	280	12961	1.98e-08	1.31e-06
EGFR	PIK3C2B	6	10	280	12961	1.98e-08	1.31e-06
EGFR	SOCS3	6	10	475	12961	4.48e-07	1.84e-05
EGFR	SOCS6	6	10	280	12961	1.98e-08	1.31e-06
EGFR	IRS4	6	10	280	12961	1.98e-08	1.31e-06
EGFR	PSMA7	6	10	475	12961	4.48e-07	1.84e-05
EGFR	SCAMP3	6	10	280	12961	1.98e-08	1.31e-06
EGFR	PLD2	6	10	280	12961	1.98e-08	1.31e-06
EGFR	AURKA	6	10	475	12961	4.48e-07	1.84e-05
EGFR	DEGS1	6	10	280	12961	1.98e-08	1.31e-06
EGFR	SCAMP1	6	10	280	12961	1.98e-08	1.31e-06
EGFR	PLSCR1	6	10	280	12961	1.98e-08	1.31e-06
EGFR	RGS16	6	10	475	12961	4.48e-07	1.84e-05
EGFR	ARPC5	6	10	475	12961	4.48e-07	1.84e-05
EGFR	SGSM2	6	10	280	12961	1.98e-08	1.31e-06
EGFR	LAT	6	10	280	12961	1.98e-08	1.31e-06
EGFR	NCK2	6	10	280	12961	1.98e-08	1.31e-06
EGFR	ACTN4	6	10	475	12961	4.48e-07	1.84e-05
EGFR	CALU	6	10	280	12961	1.98e-08	1.31e-06
EGFR	TLR2	6	10	475	12961	4.48e-07	1.84e-05
EGFR	JAK2	2	10	15	12961	5.99e-05	0.00108274
EGFR	CTNND1	6	10	475	12961	4.48e-07	1.84e-05
EGFR	SH2D1A	6	10	475	12961	4.48e-07	1.84e-05
EGFR	MEGF6	6	10	280	12961	1.98e-08	1.31e-06
EGFR	DNAJC13	6	10	280	12961	1.98e-08	1.31e-06
EGFR	ZPR1	6	10	475	12961	4.48e-07	1.84e-05
EGFR	SH3BGRL	6	10	475	12961	4.48e-07	1.84e-05
EGFR	FRAT2	6	10	280	12961	1.98e-08	1.31e-06
EGFR	TOM1L1	6	10	280	12961	1.98e-08	1.31e-06
EGFR	GRAP2	6	10	280	12961	1.98e-08	1.31e-06
EGFR	STAM2	6	10	280	12961	1.98e-08	1.31e-06
EGFR	SORBS2	6	10	280	12961	1.98e-08	1.31e-06
EGFR	HEXIM1	6	10	280	12961	1.98e-08	1.31e-06
EGFR	AHSA1	6	10	280	12961	1.98e-08	1.31e-06
EGFR	APBB3	6	10	280	12961	1.98e-08	1.31e-06
EGFR	APBA3	6	10	280	12961	1.98e-08	1.31e-06
EGFR	EGFR	6	10	301	12961	3.04e-08	1.99e-06
EGFR	TGFB1	6	10	280	12961	1.98e-08	1.31e-06
EGFR	FN1	6	10	280	12961	1.98e-08	1.31e-06
EGFR	ALDOA	6	10	475	12961	4.48e-07	1.84e-05
EGFR	ANXA1	6	10	475	12961	4.48e-07	1.84e-05
EGFR	NR3C1	6	10	280	12961	1.98e-08	1.31e-06
EGFR	GAPDH	6	10	475	12961	4.48e-07	1.84e-05
EGFR	APP	6	10	280	12961	1.98e-08	1.31e-06
EGFR	ITGB2	6	10	475	12961	4.48e-07	1.84e-05
EGFR	ITGB1	6	10	280	12961	1.98e-08	1.31e-06
EGFR	PRKCB	6	10	478	12961	4.65e-07	1.9e-05
EGFR	UROD	6	10	475	12961	4.48e-07	1.84e-05
EGFR	GSN	6	10	475	12961	4.48e-07	1.84e-05
EGFR	CDK1	6	10	475	12961	4.48e-07	1.84e-05
EGFR	DCN	6	10	475	12961	4.48e-07	1.84e-05
EGFR	HSP90AA1	6	10	475	12961	4.48e-07	1.84e-05
EGFR	HSP90AB1	6	10	475	12961	4.48e-07	1.84e-05
EGFR	PTPRC	6	10	280	12961	1.98e-08	1.31e-06
EGFR	TPM1	6	10	280	12961	1.98e-08	1.31e-06
EGFR	FGR	6	10	475	12961	4.48e-07	1.84e-05
EGFR	UCHL1	6	10	475	12961	4.48e-07	1.84e-05
EGFR	HSPA1A	6	10	280	12961	1.98e-08	1.31e-06
EGFR	AR	6	10	280	12961	1.98e-08	1.31e-06
EGFR	TXN	6	10	475	12961	4.48e-07	1.84e-05
EGFR	MAPT	6	10	280	12961	1.98e-08	1.31e-06
EGFR	HSPA8	6	10	475	12961	4.48e-07	1.84e-05
EGFR	LAMP1	6	10	280	12961	1.98e-08	1.31e-06
EGFR	PIM1	6	10	475	12961	4.48e-07	1.84e-05
EGFR	PCNA	6	10	475	12961	4.48e-07	1.84e-05
EGFR	CDH1	6	10	475	12961	4.48e-07	1.84e-05
EGFR	CD59	6	10	475	12961	4.48e-07	1.84e-05
EGFR	PKM	6	10	475	12961	4.48e-07	1.84e-05
EGFR	HSP90B1	6	10	280	12961	1.98e-08	1.31e-06
EGFR	JUP	6	10	475	12961	4.48e-07	1.84e-05
EGFR	EZR	6	10	475	12961	4.48e-07	1.84e-05
EGFR	VAV1	6	10	475	12961	4.48e-07	1.84e-05
EGFR	AREG	6	10	280	12961	1.98e-08	1.31e-06
EGFR	MUC1	6	10	280	12961	1.98e-08	1.31e-06
EGFR	CD44	6	10	280	12961	1.98e-08	1.31e-06
EGFR	CBR1	6	10	475	12961	4.48e-07	1.84e-05
EGFR	NCK1	6	10	280	12961	1.98e-08	1.31e-06
EGFR	PLCG2	6	10	280	12961	1.98e-08	1.31e-06
EGFR	FAH	6	10	475	12961	4.48e-07	1.84e-05
EGFR	GOT1	6	10	475	12961	4.48e-07	1.84e-05
EGFR	PRKCA	6	10	475	12961	4.48e-07	1.84e-05
EGFR	SYN1	6	10	280	12961	1.98e-08	1.31e-06
EGFR	PRKACA	6	10	475	12961	4.48e-07	1.84e-05
EGFR	PTPN1	6	10	475	12961	4.48e-07	1.84e-05
EGFR	ARF4	6	10	475	12961	4.48e-07	1.84e-05
EGFR	PLCG1	6	10	280	12961	1.98e-08	1.31e-06
EGFR	TNFRSF1A	6	10	280	12961	1.98e-08	1.31e-06
EGFR	RAB3A	6	10	475	12961	4.48e-07	1.84e-05
EGFR	RASA1	6	10	280	12961	1.98e-08	1.31e-06
EGFR	CSRP1	6	10	478	12961	4.65e-07	1.9e-05
EGFR	ERBB3	3	10	44	12961	4.61e-06	0.000154644
EGFR	PTPRB	6	10	280	12961	1.98e-08	1.31e-06
EGFR	CFL1	6	10	475	12961	4.48e-07	1.84e-05
EGFR	S100A4	6	10	475	12961	4.48e-07	1.84e-05
EGFR	EEF1G	6	10	280	12961	1.98e-08	1.31e-06
EGFR	YWHAQ	6	10	475	12961	4.48e-07	1.84e-05
EGFR	PIK3R1	6	10	280	12961	1.98e-08	1.31e-06
EGFR	PTPN6	6	10	475	12961	4.48e-07	1.84e-05
EGFR	SHC1	6	10	280	12961	1.98e-08	1.31e-06
EGFR	CASP1	6	10	475	12961	4.48e-07	1.84e-05
EGFR	CDC25A	6	10	280	12961	1.98e-08	1.31e-06
EGFR	CDC25C	6	10	280	12961	1.98e-08	1.31e-06
EGFR	PRKAR1B	6	10	475	12961	4.48e-07	1.84e-05
EGFR	AKT1	6	10	475	12961	4.48e-07	1.84e-05
EGFR	ATIC	6	10	475	12961	4.48e-07	1.84e-05
EGFR	YWHAB	6	10	475	12961	4.48e-07	1.84e-05
EGFR	SFN	6	10	475	12961	4.48e-07	1.84e-05
EGFR	STIP1	6	10	280	12961	1.98e-08	1.31e-06
EGFR	ARRB2	6	10	475	12961	4.48e-07	1.84e-05
EGFR	HSPA4	6	10	475	12961	4.48e-07	1.84e-05
EGFR	ATP5F1C	6	10	475	12961	4.48e-07	1.84e-05
EGFR	PPARG	6	10	475	12961	4.48e-07	1.84e-05
EGFR	SNCA	6	10	475	12961	4.48e-07	1.84e-05
EGFR	HSPA9	6	10	475	12961	4.48e-07	1.84e-05
EGFR	MPV17	6	10	280	12961	1.98e-08	1.31e-06
EGFR	STAT3	6	10	475	12961	4.48e-07	1.84e-05
EGFR	USP8	6	10	280	12961	1.98e-08	1.31e-06
EGFR	MDH1	6	10	280	12961	1.98e-08	1.31e-06
EGFR	PTGDS	5	10	163	12961	7.52e-08	4.67e-06
EGFR	STAT1	6	10	475	12961	4.48e-07	1.84e-05
EGFR	STAT5A	6	10	475	12961	4.48e-07	1.84e-05
EGFR	EPS15	6	10	280	12961	1.98e-08	1.31e-06
EGFR	CASP3	6	10	475	12961	4.48e-07	1.84e-05
EGFR	MATR3	6	10	280	12961	1.98e-08	1.31e-06
EGFR	MAPK8	6	10	475	12961	4.48e-07	1.84e-05
EGFR	MAPK9	6	10	475	12961	4.48e-07	1.84e-05
EGFR	CRK	6	10	475	12961	4.48e-07	1.84e-05
EGFR	CRKL	6	10	475	12961	4.48e-07	1.84e-05
EGFR	NEDD4	6	10	280	12961	1.98e-08	1.31e-06
EGFR	CAMLG	6	10	280	12961	1.98e-08	1.31e-06
EGFR	ARRB1	6	10	475	12961	4.48e-07	1.84e-05
EGFR	NUMB	6	10	280	12961	1.98e-08	1.31e-06
EGFR	RGS4	6	10	475	12961	4.48e-07	1.84e-05
EGFR	SELENOP	6	10	280	12961	1.98e-08	1.31e-06
EGFR	EMD	6	10	280	12961	1.98e-08	1.31e-06
EGFR	DUSP3	6	10	475	12961	4.48e-07	1.84e-05
EGFR	CAV2	6	10	280	12961	1.98e-08	1.31e-06
EGFR	STAT5B	6	10	475	12961	4.48e-07	1.84e-05
EGFR	RAP1GDS1	6	10	475	12961	4.48e-07	1.84e-05
EGFR	STAT2	6	10	475	12961	4.48e-07	1.84e-05
EGFR	VAV2	6	10	475	12961	4.48e-07	1.84e-05
EGFR	PPP5C	6	10	475	12961	4.48e-07	1.84e-05
EGFR	OAZ1	6	10	475	12961	4.48e-07	1.84e-05
EGFR	PSMD4	6	10	475	12961	4.48e-07	1.84e-05
EGFR	CASP7	6	10	475	12961	4.48e-07	1.84e-05
EGFR	STX17	6	10	280	12961	1.98e-08	1.31e-06
EGFR	TPI1	6	10	475	12961	4.48e-07	1.84e-05
EGFR	SEC61B	6	10	280	12961	1.98e-08	1.31e-06
EGFR	GABARAPL2	6	10	475	12961	4.48e-07	1.84e-05
EGFR	SNAP25	6	10	280	12961	1.98e-08	1.31e-06
EGFR	CALM1	6	10	475	12961	4.48e-07	1.84e-05
EGFR	ARF6	6	10	475	12961	4.48e-07	1.84e-05
EGFR	PPP2CB	6	10	475	12961	4.48e-07	1.84e-05
EGFR	GRB2	6	10	475	12961	4.48e-07	1.84e-05
EGFR	YWHAZ	6	10	475	12961	4.48e-07	1.84e-05
EGFR	ACTA1	6	10	280	12961	1.98e-08	1.31e-06
EGFR	c-fgr	6	10	280	12961	1.98e-08	1.31e-06
EGFR	FANCC	6	10	280	12961	1.98e-08	1.31e-06
EGFR	PRKCE	6	10	280	12961	1.98e-08	1.31e-06
EGFR	CNTN2	6	10	280	12961	1.98e-08	1.31e-06
EGFR	FKBP4	6	10	475	12961	4.48e-07	1.84e-05
EGFR	AKAP12	6	10	280	12961	1.98e-08	1.31e-06
EGFR	CAV1	6	10	280	12961	1.98e-08	1.31e-06
EGFR	PTPN12	6	10	280	12961	1.98e-08	1.31e-06
EGFR	PRKCZ	6	10	475	12961	4.48e-07	1.84e-05
EGFR	PRKCD	6	10	280	12961	1.98e-08	1.31e-06
EGFR	PTPN11	6	10	475	12961	4.48e-07	1.84e-05
EGFR	PRDX1	6	10	475	12961	4.48e-07	1.84e-05
EGFR	SOS2	6	10	475	12961	4.48e-07	1.84e-05
EGFR	LRP1	6	10	280	12961	1.98e-08	1.31e-06
EGFR	ITK	5	10	46	12961	1.4e-10	1.78e-08
EGFR	AHNAK	6	10	280	12961	1.98e-08	1.31e-06
EGFR	MAP3K12	6	10	280	12961	1.98e-08	1.31e-06
EGFR	PTPRJ	6	10	280	12961	1.98e-08	1.31e-06
EGFR	EPS8	6	10	280	12961	1.98e-08	1.31e-06
EGFR	TRAF2	6	10	280	12961	1.98e-08	1.31e-06
EGFR	LCP2	6	10	280	12961	1.98e-08	1.31e-06
EGFR	PAK1	6	10	475	12961	4.48e-07	1.84e-05
EGFR	SLA	6	10	475	12961	4.48e-07	1.84e-05
EGFR	GRB10	6	10	280	12961	1.98e-08	1.31e-06
EGFR	MAPK8IP2	6	10	280	12961	1.98e-08	1.31e-06
EGFR	FKBP5	6	10	475	12961	4.48e-07	1.84e-05
EGFR	GAB1	6	10	280	12961	1.98e-08	1.31e-06
EGFR	GPM6B	6	10	280	12961	1.98e-08	1.31e-06
EGFR	PICALM	6	10	280	12961	1.98e-08	1.31e-06
EGFR	DCTN2	6	10	280	12961	1.98e-08	1.31e-06
EGFR	SNX1	6	10	280	12961	1.98e-08	1.31e-06
EGFR	RIN1	6	10	280	12961	1.98e-08	1.31e-06
EGFR	RAPGEF1	6	10	280	12961	1.98e-08	1.31e-06
EGFR	COL9A3	6	10	280	12961	1.98e-08	1.31e-06
EGFR	CYLC2	6	10	280	12961	1.98e-08	1.31e-06
EGFR	KEAP1	6	10	280	12961	1.98e-08	1.31e-06
EGFR	ARHGEF7	6	10	280	12961	1.98e-08	1.31e-06
EGFR	DYNC1H1	6	10	475	12961	4.48e-07	1.84e-05
EGFR	CTTN	6	10	280	12961	1.98e-08	1.31e-06
EGFR	FKBP8	6	10	280	12961	1.98e-08	1.31e-06
EGFR	GRB14	6	10	280	12961	1.98e-08	1.31e-06
EGFR	GRB7	6	10	280	12961	1.98e-08	1.31e-06
EGFR	BECN1	6	10	280	12961	1.98e-08	1.31e-06
EGFR	SPARCL1	6	10	280	12961	1.98e-08	1.31e-06
EGFR	SPCS2	6	10	280	12961	1.98e-08	1.31e-06
EGFR	EEA1	6	10	280	12961	1.98e-08	1.31e-06
EGFR	PDK3	6	10	475	12961	4.48e-07	1.84e-05
EGFR	PRKD1	6	10	280	12961	1.98e-08	1.31e-06
EGFR	TAB1	6	10	475	12961	4.48e-07	1.84e-05
EGFR	ADRM1	6	10	475	12961	4.48e-07	1.84e-05
EGFR	MAPK14	6	10	475	12961	4.48e-07	1.84e-05
EGFR	CDC37	6	10	475	12961	4.48e-07	1.84e-05
EGFR	MAPKAPK3	6	10	475	12961	4.48e-07	1.84e-05
EGFR	LRRK1	6	10	280	12961	1.98e-08	1.31e-06
EGFR	PLCH1	6	10	280	12961	1.98e-08	1.31e-06
EGFR	DKFZp686J1568	6	10	280	12961	1.98e-08	1.31e-06
EGFR	TSTD2	6	10	280	12961	1.98e-08	1.31e-06
EGFR	TNS3	6	10	280	12961	1.98e-08	1.31e-06
EGFR	DOK6	6	10	280	12961	1.98e-08	1.31e-06
EGFR	SHC4	6	10	280	12961	1.98e-08	1.31e-06
EGFR	TMCO3	6	10	280	12961	1.98e-08	1.31e-06
EGFR	TUBA1A	6	10	475	12961	4.48e-07	1.84e-05
EGFR	KCTD9	6	10	280	12961	1.98e-08	1.31e-06
EGFR	CLNK	6	10	280	12961	1.98e-08	1.31e-06
EGFR	LAPTM4B	6	10	280	12961	1.98e-08	1.31e-06
EGFR	NUDCD3	6	10	280	12961	1.98e-08	1.31e-06
EGFR	CMTM8	6	10	280	12961	1.98e-08	1.31e-06
EGFR	TNS4	6	10	280	12961	1.98e-08	1.31e-06
EGFR	RUSC2	6	10	280	12961	1.98e-08	1.31e-06
EGFR	SH2D3C	6	10	280	12961	1.98e-08	1.31e-06
EGFR	AOPEP	6	10	280	12961	1.98e-08	1.31e-06
EGFR	FBXO25	6	10	280	12961	1.98e-08	1.31e-06
EGFR	MGARP	6	10	280	12961	1.98e-08	1.31e-06
EGFR	CHD5	6	10	280	12961	1.98e-08	1.31e-06
EGFR	DOK4	6	10	280	12961	1.98e-08	1.31e-06
EGFR	FRS2	6	10	280	12961	1.98e-08	1.31e-06
EGFR	HDAC7	6	10	280	12961	1.98e-08	1.31e-06
EGFR	PDCD6IP	6	10	475	12961	4.48e-07	1.84e-05
EGFR	RIN2	6	10	280	12961	1.98e-08	1.31e-06
EGFR	SHC3	6	10	280	12961	1.98e-08	1.31e-06
EGFR	PIK3R3	6	10	475	12961	4.48e-07	1.84e-05
EGFR	PTPRU	6	10	280	12961	1.98e-08	1.31e-06
EGFR	PRCC	6	10	280	12961	1.98e-08	1.31e-06
EGFR	APBB2	6	10	280	12961	1.98e-08	1.31e-06
EGFR	MAP4K1	6	10	280	12961	1.98e-08	1.31e-06
EGFR	PNPLA2	6	10	280	12961	1.98e-08	1.31e-06
EGFR	AP2M1	6	10	475	12961	4.48e-07	1.84e-05
EGFR	DCBLD2	6	10	280	12961	1.98e-08	1.31e-06
EGFR	SYNGAP1	6	10	280	12961	1.98e-08	1.31e-06
EGFR	PIGS	6	10	280	12961	1.98e-08	1.31e-06
EGFR	NIBAN2	6	10	280	12961	1.98e-08	1.31e-06
EGFR	CYTH2	6	10	475	12961	4.48e-07	1.84e-05
EGFR	NDN	6	10	280	12961	1.98e-08	1.31e-06
EGFR	DOK1	6	10	280	12961	1.98e-08	1.31e-06
EGFR	MAP3K3	6	10	280	12961	1.98e-08	1.31e-06
EGFR	OLFM1	6	10	475	12961	4.48e-07	1.84e-05
EGFR	PTPN18	6	10	475	12961	4.48e-07	1.84e-05
EGFR	SH3GL2	6	10	475	12961	4.48e-07	1.84e-05
EGFR	SH3GL3	6	10	475	12961	4.48e-07	1.84e-05
EGFR	SH2D3A	6	10	475	12961	4.48e-07	1.84e-05
EGFR	TRMO	6	10	280	12961	1.98e-08	1.31e-06
EGFR	RNF126	6	10	280	12961	1.98e-08	1.31e-06
EGFR	HEMGN	6	10	280	12961	1.98e-08	1.31e-06
EGFR	VPS33B	6	10	478	12961	4.65e-07	1.9e-05
EGFR	SH3BGRL3	6	10	475	12961	4.48e-07	1.84e-05
EGFR	SLA2	6	10	475	12961	4.48e-07	1.84e-05
EGFR	DNAJC4	6	10	280	12961	1.98e-08	1.31e-06
EGFR	SH2D2A	6	10	280	12961	1.98e-08	1.31e-06
EGFR	NANS	6	10	478	12961	4.65e-07	1.9e-05
EGFR	SH2B1	6	10	280	12961	1.98e-08	1.31e-06
EGFR	CISH	6	10	475	12961	4.48e-07	1.84e-05
EGFR	ITSN2	6	10	280	12961	1.98e-08	1.31e-06
EGFR	VAPA	6	10	475	12961	4.48e-07	1.84e-05
EGFR	DOK5	6	10	280	12961	1.98e-08	1.31e-06
EGFR	HDAC6	6	10	280	12961	1.98e-08	1.31e-06
EGFR	DKFZp434N101	6	10	280	12961	1.98e-08	1.31e-06
EGFR	STAP2	6	10	280	12961	1.98e-08	1.31e-06
EGFR	RABGEF1	6	10	280	12961	1.98e-08	1.31e-06
EGFR	APPL1	6	10	475	12961	4.48e-07	1.84e-05
EGFR	AGO2	6	10	475	12961	4.48e-07	1.84e-05
EGFR	VAV3	6	10	475	12961	4.48e-07	1.84e-05
EGFR	STUB1	6	10	280	12961	1.98e-08	1.31e-06
EGFR	EXOC7	6	10	475	12961	4.48e-07	1.84e-05
EGFR	WASF3	6	10	280	12961	1.98e-08	1.31e-06
EGFR	BAIAP2	6	10	280	12961	1.98e-08	1.31e-06
EGFR	MAPK8IP1	6	10	280	12961	1.98e-08	1.31e-06
EGFR	CAMK2A	6	10	475	12961	4.48e-07	1.84e-05
EGFR	SH2B3	6	10	280	12961	1.98e-08	1.31e-06
EGFR	PIN4	6	10	475	12961	4.48e-07	1.84e-05
EGFR	ZNF510	6	10	280	12961	1.98e-08	1.31e-06
EGFR	MAST1	6	10	280	12961	1.98e-08	1.31e-06
EGFR	PTPN22	6	10	280	12961	1.98e-08	1.31e-06
EGFR	MOB4	6	10	475	12961	4.48e-07	1.84e-05
EGFR	TLN1	6	10	280	12961	1.98e-08	1.31e-06
EGFR	CTG3a	6	10	280	12961	1.98e-08	1.31e-06
EGFR	RNF115	6	10	280	12961	1.98e-08	1.31e-06
EGFR	SNX9	6	10	475	12961	4.48e-07	1.84e-05
EGFR	IKBKG	6	10	280	12961	1.98e-08	1.31e-06
EGFR	NUMBL	6	10	280	12961	1.98e-08	1.31e-06
EGFR	CAPN7	6	10	280	12961	1.98e-08	1.31e-06
EGFR	HEL-S-162eP	6	10	475	12961	4.48e-07	1.84e-05
EGFR	HEL-S-72p	6	10	475	12961	4.48e-07	1.84e-05
EGFR	HEL-S-77	6	10	280	12961	1.98e-08	1.31e-06
EGFR	HEL-S-94n	6	10	280	12961	1.98e-08	1.31e-06
EGFR	HEL-117	6	10	475	12961	4.48e-07	1.84e-05
EGFR	HEL-S-1	6	10	475	12961	4.48e-07	1.84e-05
EGFR	HEL-S-22	6	10	280	12961	1.98e-08	1.31e-06
EGFR	HEL-S-32	6	10	475	12961	4.48e-07	1.84e-05
EGFR	HEL-S-70p	6	10	475	12961	4.48e-07	1.84e-05
EGFR	HEL-S-15	6	10	475	12961	4.48e-07	1.84e-05
EGFR	HEL-S-49	6	10	475	12961	4.48e-07	1.84e-05
EGFR	HEL-S-87p	6	10	475	12961	4.48e-07	1.84e-05
EGFR	HEL-S-125m	6	10	475	12961	4.48e-07	1.84e-05
PLG	CP	6	12	297	6380	7.37e-06	0.000233262
PLG	PLG	4	12	195	6380	0.000354629	0.00438439
PLG	APOH	6	12	297	6380	7.37e-06	0.000233262
PLG	SERPINF2	6	12	297	6380	7.37e-06	0.000233262
PLG	MMP7	6	12	297	6380	7.37e-06	0.000233262
PLG	SPARC	6	12	297	6380	7.37e-06	0.000233262
PLG	HSPA1B	4	12	180	6380	0.000261438	0.00361128
PLG	RAP2A	6	12	297	6380	7.37e-06	0.000233262
PLG	CHGA	4	12	180	6380	0.000261438	0.00361128
PLG	HSPD1	6	12	297	6380	7.37e-06	0.000233262
PLG	IGFBP3	4	12	180	6380	0.000261438	0.00361128
PLG	ATP5F1A	4	12	180	6380	0.000261438	0.00361128
PLG	F2RL1	4	12	180	6380	0.000261438	0.00361128
PLG	ACTG1	6	12	297	6380	7.37e-06	0.000233262
PLG	SMAD3	4	12	180	6380	0.000261438	0.00361128
PLG	EP300	4	12	180	6380	0.000261438	0.00361128
PLG	PRDX4	6	12	297	6380	7.37e-06	0.000233262
PLG	PAPPA	4	12	180	6380	0.000261438	0.00361128
PLG	SMAD4	4	12	180	6380	0.000261438	0.00361128
PLG	PCOLCE	4	12	180	6380	0.000261438	0.00361128
PLG	MAPK14	6	12	297	6380	7.37e-06	0.000233262
PLG	AMOT	4	12	180	6380	0.000261438	0.00361128
PLG	DIPLA1	4	12	180	6380	0.000261438	0.00361128
PLG	RBBP6	4	12	180	6380	0.000261438	0.00361128
PLG	CYFIP2	6	12	297	6380	7.37e-06	0.000233262
PLG	YTHDC1	4	12	180	6380	0.000261438	0.00361128
PLG	PLGRKT	4	12	180	6380	0.000261438	0.00361128
PLG	HEL-S-102	6	12	297	6380	7.37e-06	0.000233262
PLG	HEL-S-97n	6	12	297	6380	7.37e-06	0.000233262
SERPINA3	ADH1B	2	2	43	4504	9.11e-05	0.0014977
KRAS	CALM3	2	9	34	7302	0.000763724	0.00717262
KRAS	PIK3R2	7	9	95	7302	2.22e-12	3.22e-10
KRAS	PDE6D	7	9	51	7302	2.92e-14	6.4e-12
KRAS	DEAF1	2	9	35	7302	0.000808792	0.00745224
KRAS	FRAT2	7	9	94	7302	2.06e-12	3.01e-10
KRAS	ZNF189	7	9	94	7302	2.06e-12	3.01e-10
KRAS	MT-CYB	7	9	96	7302	2.39e-12	3.38e-10
KRAS	MT-CO3	7	9	94	7302	2.06e-12	3.01e-10
KRAS	HNRNPC	2	9	35	7302	0.000808792	0.00745224
KRAS	QDPR	7	9	50	7302	2.51e-14	5.93e-12
KRAS	IGFBP3	2	9	36	7302	0.000855121	0.00782308
KRAS	PSMA3	7	9	51	7302	2.92e-14	6.4e-12
KRAS	ADH6	7	9	51	7302	2.92e-14	6.4e-12
KRAS	SERPINB5	7	9	57	7302	6.23e-14	1.18e-11
KRAS	PIK3CA	7	9	96	7302	2.39e-12	3.38e-10
KRAS	RAP1GDS1	7	9	54	7302	4.25e-14	8.82e-12
KRAS	STX17	2	9	36	7302	0.000855121	0.00782308
KRAS	FANCC	2	9	37	7302	0.00090271	0.00812392
KRAS	CYB	7	9	96	7302	2.39e-12	3.38e-10
KRAS	PDE4DIP	7	9	95	7302	2.22e-12	3.22e-10
KRAS	EDG2	2	9	35	7302	0.000808792	0.00745224
KRAS	COX3	7	9	96	7302	2.39e-12	3.38e-10
KRAS	ZDHHC17	2	9	37	7302	0.00090271	0.00812392
KRAS	LPAR1	7	9	59	7302	8.02e-14	1.48e-11
KRAS	THRSP	7	9	51	7302	2.92e-14	6.4e-12
KRAS	RBPMS	2	9	36	7302	0.000855121	0.00782308
KRAS	DNAJA3	2	9	37	7302	0.00090271	0.00812392
KRAS	IGSF21	2	9	38	7302	0.000951556	0.00841562
KRAS	MDFI	2	9	35	7302	0.000808792	0.00745224
KRAS	DDX50	2	9	35	7302	0.000808792	0.00745224
KRAS	HEMGN	7	9	94	7302	2.06e-12	3.01e-10
KRAS	DDX47	7	9	51	7302	2.92e-14	6.4e-12
KRAS	BCAS3	2	9	35	7302	0.000808792	0.00745224
KRAS	OSGIN1	2	9	37	7302	0.00090271	0.00812392
CHRNA1	CHRNG	6	6	256	2807	5.75e-07	2.35e-05
CHRNA1	CHRND	4	6	134	2807	7.21e-05	0.00127057
SLC4A1	LYN	4	8	295	5287	0.000565535	0.00589304
SLC4A1	SYK	4	8	295	5287	0.000565535	0.00589304
SLC4A1	HEL-76	4	8	295	5287	0.000565535	0.00589304
C1QA	C1QB	2	2	25	1272	0.000386283	0.00460917
C1QB	PTX3	3	6	58	1601	0.000875625	0.00795858
C1QB	MYOC	3	6	63	1601	0.00111411	0.00949044
TFRC	B2M	2	2	51	7887	4.18e-05	0.000801646
TF	TF	2	3	73	8565	0.000216689	0.00316156
TF	TUBB4A	2	3	146	8565	0.000861804	0.00787974
TF	RAB5A	2	3	148	8565	0.000885438	0.00802509
TF	TUBB3	2	3	146	8565	0.000861804	0.00787974
TF	HFE	2	3	148	8565	0.000885438	0.00802509
TP53	CABL1	17	49	130	3924	1.62e-13	2.7e-11
TP53	HSPA1B	17	49	115	3924	2.13e-14	5.08e-12
TP53	NR1i1	17	49	126	3924	1.01e-13	1.8e-11
TP53	PSMD11	10	49	81	3924	5.53e-08	3.45e-06
TP53	CHEK1	17	49	108	3924	1.1e-14	2.76e-12
TP53	IKBKB	16	49	111	3924	2.33e-13	3.82e-11
TP53	AURKA	15	49	107	3924	2.24e-12	3.23e-10
TP53	SCAMP1	16	49	106	3924	1.17e-13	2.02e-11
TP53	PRKAB2	16	49	106	3924	1.17e-13	2.02e-11
TP53	NUAK1	17	49	130	3924	1.62e-13	2.7e-11
TP53	KDM1A	11	49	99	3924	3.17e-08	2.06e-06
TP53	SIN3B	25	49	173	3924	1.67e-15	4.43e-13
TP53	MTA2	25	49	173	3924	1.67e-15	4.43e-13
TP53	ARIH2	16	49	104	3924	8.7e-14	1.57e-11
TP53	BAG2	17	49	124	3924	7.75e-14	1.44e-11
TP53	EFEMP2	25	49	173	3924	1.67e-15	4.43e-13
TP53	PTTG1	17	49	128	3924	1.31e-13	2.25e-11
TP53	PNP	14	49	100	3924	1.42e-11	1.93e-09
TP53	AGT	22	49	176	3924	6.66e-16	2.68e-13
TP53	APOH	13	49	104	3924	3.42e-10	4.24e-08
TP53	TK1	12	49	94	3924	1.44e-09	1.73e-07
TP53	S100B	12	49	94	3924	1.44e-09	1.73e-07
TP53	TP53	25	49	163	3924	2.11e-15	5.56e-13
TP53	HSPB1	15	49	106	3924	1.97e-12	2.93e-10
TP53	S100A8	15	49	97	3924	5.59e-13	8.85e-11
TP53	TFAP2A	17	49	118	3924	3.75e-14	7.94e-12
TP53	CDK1	17	49	104	3924	5.22e-15	1.33e-12
TP53	S100A6	13	49	104	3924	3.42e-10	4.24e-08
TP53	NPM1	16	49	98	3924	3.25e-14	6.97e-12
TP53	HSP90AA1	12	49	86	3924	5.33e-10	6.54e-08
TP53	HSPA1A	25	49	173	3924	1.67e-15	4.43e-13
TP53	AR	23	49	144	3924	0	0
TP53	BCL2	17	49	108	3924	1.1e-14	2.76e-12
TP53	TXN	12	49	110	3924	8.26e-09	9.03e-07
TP53	HSPA8	22	49	176	3924	6.66e-16	2.68e-13
TP53	TOP1	22	49	176	3924	6.66e-16	2.68e-13
TP53	VDR	11	49	103	3924	4.72e-08	2.95e-06
TP53	ANXA3	11	49	87	3924	8.52e-09	9.21e-07
TP53	XRCC6	22	49	176	3924	6.66e-16	2.68e-13
TP53	TPT1	17	49	112	3924	1.44e-14	3.6e-12
TP53	TRIM27	16	49	106	3924	1.17e-13	2.02e-11
TP53	MUC1	25	49	173	3924	1.67e-15	4.43e-13
TP53	PLCG2	25	49	173	3924	1.67e-15	4.43e-13
TP53	CEBPB	17	49	118	3924	3.75e-14	7.94e-12
TP53	DDX5	22	49	176	3924	6.66e-16	2.68e-13
TP53	EGR1	25	49	173	3924	1.67e-15	4.43e-13
TP53	GPX2	15	49	101	3924	9.93e-13	1.5e-10
TP53	RCC1	10	49	79	3924	4.38e-08	2.75e-06
TP53	ATF3	16	49	102	3924	6.39e-14	1.2e-11
TP53	ERCC3	17	49	116	3924	2.8e-14	6.38e-12
TP53	EIF2AK2	22	49	176	3924	6.66e-16	2.68e-13
TP53	CR2	25	49	173	3924	1.67e-15	4.43e-13
TP53	EIF2S2	16	49	96	3924	2.75e-14	6.38e-12
TP53	TBP	16	49	107	3924	1.32e-13	2.25e-11
TP53	RAB4A	12	49	92	3924	1.14e-09	1.37e-07
TP53	SAT1	14	49	97	3924	9.5e-12	1.3e-09
TP53	NR4A1	25	49	173	3924	1.67e-15	4.43e-13
TP53	S100A1	15	49	100	3924	8.6e-13	1.32e-10
TP53	RPS3	19	49	108	3924	2.66e-15	6.91e-13
TP53	GADD45A	11	49	95	3924	2.09e-08	1.37e-06
TP53	CDK2	15	49	108	3924	2.56e-12	3.61e-10
TP53	YY1	17	49	117	3924	2.96e-14	6.4e-12
TP53	NFKBIA	13	49	104	3924	3.42e-10	4.24e-08
TP53	APEX1	13	49	84	3924	2.53e-11	3.33e-09
TP53	MSX1	17	49	119	3924	4.04e-14	8.44e-12
TP53	MAPK1	10	49	93	3924	1.97e-07	1.05e-05
TP53	S100A2	16	49	110	3924	2e-13	3.3e-11
TP53	PML	25	49	173	3924	1.67e-15	4.43e-13
TP53	RRM2	16	49	114	3924	3.46e-13	5.57e-11
TP53	TTK	25	49	173	3924	1.67e-15	4.43e-13
TP53	PHB1	17	49	114	3924	2.04e-14	4.98e-12
TP53	PTGS2	22	49	176	3924	6.66e-16	2.68e-13
TP53	ARL3	14	49	100	3924	1.42e-11	1.93e-09
TP53	PPP1CC	15	49	93	3924	3.05e-13	4.92e-11
TP53	SREBF1	25	49	173	3924	1.67e-15	4.43e-13
TP53	HSPA9	22	49	176	3924	6.66e-16	2.68e-13
TP53	CDKN1A	15	49	99	3924	7.48e-13	1.16e-10
TP53	STAT1	16	49	116	3924	4.51e-13	7.18e-11
TP53	STAT6	16	49	113	3924	3e-13	4.9e-11
TP53	CDKN2A	13	49	91	3924	6.74e-11	8.71e-09
TP53	CDKN2C	13	49	106	3924	4.3e-10	5.3e-08
TP53	MAPK8	15	49	95	3924	4.14e-13	6.63e-11
TP53	MAPK9	10	49	97	3924	2.9e-07	1.48e-05
TP53	CRK	19	49	116	3924	1.55e-15	4.43e-13
TP53	BRCC3	14	49	95	3924	7.22e-12	9.92e-10
TP53	RPS10	12	49	97	3924	2.05e-09	2.43e-07
TP53	MAP1B	25	49	173	3924	1.67e-15	4.43e-13
TP53	UBE2A	14	49	106	3924	3.05e-11	3.99e-09
TP53	RANBP2	25	49	173	3924	1.67e-15	4.43e-13
TP53	GSK3B	12	49	91	3924	1e-09	1.21e-07
TP53	TAF6	17	49	120	3924	4.39e-14	8.87e-12
TP53	SULT1E1	16	49	106	3924	1.17e-13	2.02e-11
TP53	SERPINB9	13	49	93	3924	8.79e-11	1.13e-08
TP53	CDK7	17	49	103	3924	1.33e-15	4.43e-13
TP53	UBE2D1	13	49	103	3924	3.04e-10	3.83e-08
TP53	CSE1L	22	49	176	3924	6.66e-16	2.68e-13
TP53	ELL	25	49	173	3924	1.67e-15	4.43e-13
TP53	CCL18	18	49	111	3924	2.44e-15	6.39e-13
TP53	UBE2D3	13	49	109	3924	6.02e-10	7.36e-08
TP53	UBE2K	16	49	101	3924	5.72e-14	1.11e-11
TP53	RAP1B	13	49	92	3924	7.7e-11	9.91e-09
TP53	PPP1CA	12	49	90	3924	8.87e-10	1.08e-07
TP53	YWHAE	11	49	98	3924	2.86e-08	1.87e-06
TP53	TMSB4X	16	49	100	3924	4.62e-14	9.22e-12
TP53	UBE2D2	12	49	105	3924	4.94e-09	5.8e-07
TP53	SNRPN	15	49	99	3924	7.48e-13	1.16e-10
TP53	SUMO1	17	49	104	3924	5.22e-15	1.33e-12
TP53	CSNK2A1	10	49	72	3924	1.85e-08	1.31e-06
TP53	NTHL1	15	49	110	3924	3.31e-12	4.61e-10
TP53	ERH	11	49	98	3924	2.86e-08	1.87e-06
TP53	E2F1	17	49	129	3924	1.46e-13	2.46e-11
TP53	ANK2	25	49	173	3924	1.67e-15	4.43e-13
TP53	GSTM4	13	49	89	3924	5.14e-11	6.66e-09
TP53	RAD51	15	49	109	3924	2.91e-12	4.07e-10
TP53	BCL2L1	9	49	24	3924	1.97e-11	2.62e-09
TP53	SRSF1	17	49	116	3924	2.8e-14	6.38e-12
TP53	SREBF2	25	49	173	3924	1.67e-15	4.43e-13
TP53	TP53BP1	9	49	53	3924	1.89e-08	1.31e-06
TP53	GPS1	15	49	109	3924	2.91e-12	4.07e-10
TP53	AIMP2	11	49	100	3924	3.5e-08	2.26e-06
TP53	STX5	14	49	93	3924	5.45e-12	7.55e-10
TP53	GPS2	16	49	118	3924	5.84e-13	9.16e-11
TP53	TRIM28	25	49	173	3924	1.67e-15	4.43e-13
TP53	PIN1	12	49	95	3924	1.62e-09	1.93e-07
TP53	HDAC1	10	49	96	3924	2.63e-07	1.36e-05
TP53	TDG	11	49	100	3924	3.5e-08	2.26e-06
TP53	CUL4A	22	49	176	3924	6.66e-16	2.68e-13
TP53	TP53BP2	9	49	17	3924	9.46e-13	1.44e-10
TP53	USP10	25	49	173	3924	1.67e-15	4.43e-13
TP53	MAD2L1BP	14	49	103	3924	2.09e-11	2.77e-09
TP53	PAFAH1B3	13	49	98	3924	1.66e-10	2.11e-08
TP53	PRKD1	25	49	173	3924	1.67e-15	4.43e-13
TP53	PPA1	15	49	101	3924	9.93e-13	1.5e-10
TP53	DHCR24	25	49	173	3924	1.67e-15	4.43e-13
TP53	SAFB	17	49	125	3924	8.6e-14	1.57e-11
TP53	NR0B2	17	49	119	3924	4.04e-14	8.44e-12
TP53	NCOA2	25	49	173	3924	1.67e-15	4.43e-13
TP53	MED1	25	49	173	3924	1.67e-15	4.43e-13
TP53	TWIST1	17	49	122	3924	5.87e-14	1.12e-11
TP53	MAPK11	13	49	101	3924	2.4e-10	3.03e-08
TP53	NCOA1	25	49	173	3924	1.67e-15	4.43e-13
TP53	MAPK14	16	49	104	3924	8.7e-14	1.57e-11
TP53	TAF9	16	49	100	3924	4.62e-14	9.22e-12
TP53	BAK1	17	49	111	3924	1.48e-14	3.65e-12
TP53	SMN1	10	49	91	3924	1.62e-07	9.13e-06
TP53	IFI16	25	49	173	3924	1.67e-15	4.43e-13
TP53	MAP9	25	49	173	3924	1.67e-15	4.43e-13
TP53	UFD1L	17	49	115	3924	2.13e-14	5.08e-12
TP53	E4F1	17	49	130	3924	1.62e-13	2.7e-11
TP53	KDM4D	22	49	176	3924	6.66e-16	2.68e-13
TP53	FBXO42	17	49	127	3924	1.12e-13	1.99e-11
TP53	RRM2B	13	49	105	3924	3.84e-10	4.74e-08
TP53	KANSL1	25	49	173	3924	1.67e-15	4.43e-13
TP53	HUWE1	25	49	173	3924	1.67e-15	4.43e-13
TP53	CARM1	22	49	176	3924	6.66e-16	2.68e-13
TP53	FBXO11	25	49	173	3924	1.67e-15	4.43e-13
TP53	VRK2	22	49	176	3924	6.66e-16	2.68e-13
TP53	HIPK1	25	49	173	3924	1.67e-15	4.43e-13
TP53	MAPKAPK5	12	49	82	3924	3.12e-10	3.92e-08
TP53	ZMIZ2	17	49	121	3924	5.36e-14	1.06e-11
TP53	COP1	17	49	120	3924	4.39e-14	8.87e-12
TP53	CABLES1	25	49	173	3924	1.67e-15	4.43e-13
TP53	PPP1R13L	8	49	16	3924	2.97e-11	3.9e-09
TP53	ING5	17	49	117	3924	2.96e-14	6.4e-12
TP53	TFAP2C	17	49	123	3924	6.51e-14	1.22e-11
TP53	UFD1	13	49	89	3924	5.14e-11	6.66e-09
TP53	SMARCC1	25	49	173	3924	1.67e-15	4.43e-13
TP53	KAT5	15	49	102	3924	1.14e-12	1.71e-10
TP53	EAF2	16	49	118	3924	5.84e-13	9.16e-11
TP53	TOE1	17	49	115	3924	2.13e-14	5.08e-12
TP53	PBK	16	49	105	3924	9.84e-14	1.77e-11
TP53	EHMT2	25	49	173	3924	1.67e-15	4.43e-13
TP53	RCHY1	15	49	99	3924	7.48e-13	1.16e-10
TP53	UHRF2	25	49	173	3924	1.67e-15	4.43e-13
TP53	MPHOSPH6	14	49	94	3924	6.28e-12	8.67e-10
TP53	NDN	17	49	122	3924	5.87e-14	1.12e-11
TP53	BAG1	17	49	120	3924	4.39e-14	8.87e-12
TP53	VRK1	12	49	87	3924	6.07e-10	7.39e-08
TP53	ANTKMT	15	49	93	3924	3.05e-13	4.92e-11
TP53	DUSP26	12	49	103	3924	3.99e-09	4.7e-07
TP53	HDAC8	16	49	107	3924	1.32e-13	2.25e-11
TP53	HIPK3	25	49	173	3924	1.67e-15	4.43e-13
TP53	USP42	25	49	173	3924	1.67e-15	4.43e-13
TP53	BRD7	17	49	117	3924	2.96e-14	6.4e-12
TP53	KMT5A	17	49	116	3924	2.8e-14	6.38e-12
TP53	BABAM2	16	49	121	3924	8.49e-13	1.31e-10
TP53	WWOX	17	49	122	3924	5.87e-14	1.12e-11
TP53	CXXC1	25	49	173	3924	1.67e-15	4.43e-13
TP53	MAGEC2	22	49	176	3924	6.66e-16	2.68e-13
TP53	ING1	17	49	120	3924	4.39e-14	8.87e-12
TP53	APPL1	15	49	90	3924	1.91e-13	3.17e-11
TP53	ZMIZ1	25	49	173	3924	1.67e-15	4.43e-13
TP53	STUB1	16	49	104	3924	8.7e-14	1.57e-11
TP53	ING4	17	49	114	3924	2.04e-14	4.98e-12
TP53	UBE2J1	17	49	116	3924	2.8e-14	6.38e-12
TP53	L3MBTL1	17	49	127	3924	1.12e-13	1.99e-11
TP53	NCOR2	25	49	173	3924	1.67e-15	4.43e-13
CYP2E1	ECHS1	2	2	138	9621	0.00020574	0.00301686
CYP2E1	RPL13A	2	2	138	9621	0.00020574	0.00301686
CYP2E1	GATM	2	2	138	9621	0.00020574	0.00301686
CYP2E1	AGXT2	2	2	138	9621	0.00020574	0.00301686
REG1A	REG3A	3	11	27	1725	0.000575832	0.00597516
REG1A	PAP	3	11	27	1725	0.000575832	0.00597516
ITGB1	ITGA5	2	3	44	6127	0.000153974	0.00238142
ITGB1	ITGA4	2	3	32	6127	8.15e-05	0.00138421
ITGB1	ITGA2	2	3	81	6127	0.000519698	0.00555583
PRKCB	PHLPP1	3	8	168	10037	0.000246558	0.00348202
PRKCB	DDX58	3	8	248	10037	0.000769515	0.00719967
PRKCB	EGFR	3	8	248	10037	0.000769515	0.00719967
PRKCB	MBP	3	8	168	10037	0.000246558	0.00348202
PRKCB	FN1	3	8	168	10037	0.000246558	0.00348202
PRKCB	ITGB2	3	8	248	10037	0.000769515	0.00719967
PRKCB	RB1	3	8	248	10037	0.000769515	0.00719967
PRKCB	HSP90AB1	3	8	244	10037	0.000733988	0.00694815
PRKCB	TOP2A	3	8	244	10037	0.000733988	0.00694815
PRKCB	GAP43	3	8	244	10037	0.000733988	0.00694815
PRKCB	GRK2	3	8	37	10037	2.77e-06	9.41e-05
PRKCB	PEBP1	3	8	244	10037	0.000733988	0.00694815
PRKCB	AKT1	3	8	248	10037	0.000769515	0.00719967
PRKCB	SDC2	3	8	168	10037	0.000246558	0.00348202
PRKCB	STAT3	3	8	248	10037	0.000769515	0.00719967
PRKCB	RGS2	3	8	248	10037	0.000769515	0.00719967
PRKCB	PIK3CG	3	8	248	10037	0.000769515	0.00719967
PRKCB	NUMB	3	8	168	10037	0.000246558	0.00348202
PRKCB	GSK3A	3	8	244	10037	0.000733988	0.00694815
PRKCB	EIF6	3	8	248	10037	0.000769515	0.00719967
PRKCB	STXBP1	3	8	244	10037	0.000733988	0.00694815
PRKCB	DAB2	3	8	168	10037	0.000246558	0.00348202
PRKCB	H1-1	3	8	168	10037	0.000246558	0.00348202
PRKCB	BTK	3	8	248	10037	0.000769515	0.00719967
PRKCB	EP300	3	8	168	10037	0.000246558	0.00348202
PRKCB	TIAM1	3	8	168	10037	0.000246558	0.00348202
PRKCB	PTPA	3	8	248	10037	0.000769515	0.00719967
PRKCB	TRIM41	3	8	168	10037	0.000246558	0.00348202
PRKCB	RNF31	3	8	168	10037	0.000246558	0.00348202
PRKCB	CARD11	3	8	168	10037	0.000246558	0.00348202
PRKCB	dik	3	8	168	10037	0.000246558	0.00348202
PRKCB	IBTK	3	8	168	10037	0.000246558	0.00348202
CD5	FYN	3	3	60	3221	6.46e-06	0.000214282
CD5	VAV1	3	3	60	3221	6.46e-06	0.000214282
CD5	HNRNPU	3	3	60	3221	6.46e-06	0.000214282
CD5	CAMK2D	3	3	60	3221	6.46e-06	0.000214282
CD5	PIK3C3	3	3	60	3221	6.46e-06	0.000214282
PGK2	SHMT1	6	10	107	1688	1.09e-05	0.000329733
PGK2	HEL70	6	10	107	1688	1.09e-05	0.000329733
LAMB1	UBC	5	15	265	8140	8.35e-05	0.0013897
LAMB1	HSPD1	5	15	265	8140	8.35e-05	0.0013897
LAMB1	LAMC1	5	15	265	8140	8.35e-05	0.0013897
LAMB1	NQO1	5	15	265	8140	8.35e-05	0.0013897
LAMB1	POLR2E	5	15	265	8140	8.35e-05	0.0013897
LAMB1	ACHE	5	15	265	8140	8.35e-05	0.0013897
LAMB1	PSMD5	5	15	265	8140	8.35e-05	0.0013897
LAMB1	WASHC4	5	15	265	8140	8.35e-05	0.0013897
LAMB1	ERBIN	5	15	265	8140	8.35e-05	0.0013897
LAMB1	DPY30	5	15	265	8140	8.35e-05	0.0013897
MMP2	APP	2	5	13	4933	6.91e-05	0.00122263
PDHA1	PDHX	2	3	56	4493	0.000462169	0.00506999
PDHA1	PDHB	2	3	72	4493	0.000762165	0.00716618
PDHA1	VCAM1	2	3	56	4493	0.000462169	0.00506999
PDHA1	PPP1R2	2	3	74	4493	0.000804854	0.00743134
PDHA1	TOMM22	2	3	74	4493	0.000804854	0.00743134
PDHA1	NCDN	2	3	68	4493	0.00068024	0.00656882
CFH	NR1i1	8	16	399	8144	2.99e-07	1.51e-05
CFH	CRP	8	16	399	8144	2.99e-07	1.51e-05
CFH	CFI	8	16	399	8144	2.99e-07	1.51e-05
CFH	TFAP2A	8	16	397	8144	2.88e-07	1.47e-05
CFH	KLK1	8	16	397	8144	2.88e-07	1.47e-05
CFH	VDR	8	16	399	8144	2.99e-07	1.51e-05
CFH	PTX3	8	16	397	8144	2.88e-07	1.47e-05
CFH	GRB2	8	16	399	8144	2.99e-07	1.51e-05
CFH	SMAD3	8	16	399	8144	2.99e-07	1.51e-05
CFH	ZBTB16	8	16	399	8144	2.99e-07	1.51e-05
CFH	EP300	8	16	399	8144	2.99e-07	1.51e-05
CFH	TFAP2C	8	16	397	8144	2.88e-07	1.47e-05
CFH	YTHDC1	8	16	399	8144	2.99e-07	1.51e-05
ITGA5	ATP1A1	3	3	205	7577	1.98e-05	0.000559141
ITGA5	ITGB3	3	3	205	7577	1.98e-05	0.000559141
ITGA5	GRK6	3	3	205	7577	1.98e-05	0.000559141
ITGA5	CLK1	3	3	205	7577	1.98e-05	0.000559141
ITGA5	ATP1B3	3	3	205	7577	1.98e-05	0.000559141
SPARC	FGA	2	3	30	4831	0.000115209	0.00184135
SPARC	VTN	2	3	37	4831	0.000175076	0.00264316
SPARC	LPA	2	3	30	4831	0.000115209	0.00184135
SPARC	CASP8	2	3	59	4831	0.000443814	0.00504249
SPARC	ZNF579	2	3	30	4831	0.000115209	0.00184135
SPARC	STAB1	2	3	30	4831	0.000115209	0.00184135
SPARC	UBQLN1	2	3	30	4831	0.000115209	0.00184135
POLA1	RPA1	4	7	436	6336	0.000662467	0.00642623
BCL2	CAPN2	2	3	88	7665	0.000392397	0.00467172
BCL2	HSPA9	2	3	88	7665	0.000392397	0.00467172
BCL2	CPT1A	2	3	88	7665	0.000392397	0.00467172
BCL2	PPP3R1	2	3	50	7665	0.0001271	0.00201139
BCL2	BCL2L1	2	3	50	7665	0.0001271	0.00201139
MYL2	LRSAM1	3	4	90	1362	0.00109694	0.00935902
MYL2	MYOC	3	4	65	1362	0.000419217	0.00492898
TOP1	HNRNPA1	3	4	149	3738	0.000245765	0.00348202
EPX	NCK1	3	4	134	2708	0.000466664	0.00509905
EPX	PLCG1	3	4	134	2708	0.000466664	0.00509905
EPX	PIK3R1	3	4	134	2708	0.000466664	0.00509905
BMP3	KDM1A	3	4	79	5734	1.04e-05	0.00031797
BMP3	BMP3	2	4	34	5734	0.000209293	0.00306059
BMP3	WFIKKN2	3	4	75	5734	8.86e-06	0.000274579
BMP3	PRMT6	3	4	79	5734	1.04e-05	0.00031797
BMP3	WFIKKN1	3	4	76	5734	9.22e-06	0.000285397
COX4I1	MT-CO1	2	2	125	4792	0.000680435	0.00656882
COX4I1	MT-CO2	2	2	125	4792	0.000680435	0.00656882
COX4I1	COX2	2	2	123	4792	0.000658835	0.00640065
LAMP2	ADRB2	1	4	1	5617	0.000711934	0.00682781
LAMP2	IMPDH	1	4	1	5617	0.000711934	0.00682781
KRT13	KRT4	2	3	50	2913	0.00087374	0.00794819
ACP5	WDR57	2	2	9	2814	1.02e-05	0.000314772
ACP5	SPP1	2	2	24	2814	7.27e-05	0.00127739
ACP5	EGR2	2	2	6	2814	4.55e-06	0.000152603
ACP5	MAPK9	2	2	13	2814	2.13e-05	0.000600963
ACP5	TNFSF10	2	2	16	2814	3.23e-05	0.000652223
ACP5	ZBTB16	2	2	6	2814	4.55e-06	0.000152603
ACP5	SLC35F6	2	2	9	2814	1.02e-05	0.000314772
ENO3	CAT	2	2	105	4292	0.000598493	0.00610164
ENO3	ENO1	2	2	105	4292	0.000598493	0.00610164
ENO3	GPI	2	2	105	4292	0.000598493	0.00610164
ENO3	P4HB	2	2	105	4292	0.000598493	0.00610164
ENO3	ENO2	2	2	105	4292	0.000598493	0.00610164
ENO3	PGM1	2	2	105	4292	0.000598493	0.00610164
ENO3	TAGLN2	2	2	32	4292	5.56e-05	0.0010145
ENO3	MAN2A2	2	2	105	4292	0.000598493	0.00610164
ENO3	FABP5	2	2	49	4292	0.000130339	0.00205261
HGF	SRPX2	4	15	194	8897	0.000254456	0.00355576
HGF	FN1	4	15	194	8897	0.000254456	0.00355576
HGF	VTN	4	15	194	8897	0.000254456	0.00355576
HGF	VWF	4	15	194	8897	0.000254456	0.00355576
HGF	MET	2	15	29	8897	0.00108452	0.00926782
HGF	HGF	4	15	87	8897	1.14e-05	0.000343768
HGF	DSP	4	15	194	8897	0.000254456	0.00355576
HGF	CD44	4	15	194	8897	0.000254456	0.00355576
HGF	TNC	4	15	194	8897	0.000254456	0.00355576
HGF	BRCA1	4	15	194	8897	0.000254456	0.00355576
HGF	MEOX2	4	15	194	8897	0.000254456	0.00355576
HGF	HSPG2	4	15	194	8897	0.000254456	0.00355576
HGF	DKFZp686A03134	4	15	194	8897	0.000254456	0.00355576
HGF	ADAMTSL4	4	15	194	8897	0.000254456	0.00355576
HSP90B1	FANCC	2	3	68	4688	0.000625092	0.00619932
ETS2	NCOR1	2	2	148	4595	0.00103742	0.00896778
ETS2	ZFYVE9	2	2	150	4595	0.00106564	0.00917725
ETS2	TDP2	2	2	106	4595	0.000532158	0.0056608
ETS2	JUN	2	2	105	4595	0.000522165	0.00557849
ETS2	ERG	2	2	148	4595	0.00103742	0.00896778
ETS2	SRC	2	2	103	4595	0.000502462	0.00540939
ETS2	ETS1	2	2	99	4595	0.000464194	0.00508416
ETS2	CDK10	2	2	103	4595	0.000502462	0.00540939
ETS2	ZMYND11	2	2	104	4595	0.000512266	0.00549281
ETS2	CCNQ	2	2	106	4595	0.000532158	0.0056608
ETS2	COP1	2	2	111	4595	0.000583546	0.00603185
ETS2	SRA1	2	2	94	4595	0.00041849	0.00492223
ETS2	NCOA3	2	2	148	4595	0.00103742	0.00896778
BRAF	TIMM50	2	4	97	10380	0.000517457	0.00553371
KCNE1	ADRB2	2	2	67	5647	0.000140771	0.00220819
KCNE1	KCNQ1	2	2	75	5647	0.000176395	0.00266182
KCNE1	CALM1	2	2	96	5647	0.000289006	0.00388512
CD1D	B2M	2	2	61	2253	0.000733056	0.00694815
RAG1	RAG1	4	12	308	7815	0.000925399	0.00826383
RAG1	PPP5C	4	12	308	7815	0.000925399	0.00826383
RAG1	FKBP5	4	12	308	7815	0.000925399	0.00826383
RAG1	CACYBP	4	12	308	7815	0.000925399	0.00826383
KCNA2	KCNA4	2	3	59	4013	0.00064211	0.00624949
PRLR	VAV2	2	5	92	13208	0.000478455	0.0051926
PRLR	PTPN11	2	5	92	13208	0.000478455	0.0051926
PRLR	CREBBP	2	5	92	13208	0.000478455	0.0051926
IL7R	RAD21	3	10	29	6060	1.28e-05	0.000375585
YBX3	IGF2BP3	2	2	48	8615	3.1e-05	0.000633821
YBX3	EIF5B	2	2	68	8615	6.23e-05	0.00111119
YBX3	NDUFB10	2	2	48	8615	3.1e-05	0.000633821
YBX3	RALA	2	2	49	8615	3.24e-05	0.000652223
YBX3	CDK4	2	2	68	8615	6.23e-05	0.00111119
YBX3	COX5A	2	2	46	8615	2.85e-05	0.000621006
YBX3	CSRP1	2	2	48	8615	3.1e-05	0.000633821
YBX3	PTBP1	2	2	48	8615	3.1e-05	0.000633821
YBX3	MAPK1	2	2	49	8615	3.24e-05	0.000652223
YBX3	NMT1	2	2	48	8615	3.1e-05	0.000633821
YBX3	RFC4	2	2	48	8615	3.1e-05	0.000633821
YBX3	EIF2B2	2	2	68	8615	6.23e-05	0.00111119
YBX3	GSK3B	2	2	47	8615	2.98e-05	0.000621006
YBX3	ATP6V0D1	2	2	48	8615	3.1e-05	0.000633821
YBX3	CDK5	2	2	68	8615	6.23e-05	0.00111119
YBX3	C1QBP	2	2	49	8615	3.24e-05	0.000652223
YBX3	DHX9	2	2	68	8615	6.23e-05	0.00111119
YBX3	MAP7	2	2	68	8615	6.23e-05	0.00111119
YBX3	PCBP2	2	2	48	8615	3.1e-05	0.000633821
YBX3	NDUFA9	2	2	48	8615	3.1e-05	0.000633821
YBX3	DKFZp686K20196	2	2	68	8615	6.23e-05	0.00111119
YBX3	ABCF1	2	2	68	8615	6.23e-05	0.00111119
YBX3	NELFB	2	2	48	8615	3.1e-05	0.000633821
YBX3	DDX1	2	2	48	8615	3.1e-05	0.000633821
YBX3	PELO	2	2	48	8615	3.1e-05	0.000633821
YBX3	EIF2B3	2	2	48	8615	3.1e-05	0.000633821
YBX3	MACF1	2	2	68	8615	6.23e-05	0.00111119
YBX3	RTRAF	2	2	48	8615	3.1e-05	0.000633821
YBX3	RTCB	2	2	68	8615	6.23e-05	0.00111119
PRKCA	MGMT	2	3	125	11152	0.000374092	0.00451564
PRKCA	PEBP1	2	3	73	11152	0.000127986	0.00202342
HOXB9	SAT1	2	2	53	2705	0.000383899	0.00458412
DDX5	HNRNPK	2	2	152	7319	0.000431304	0.00504249
GABRG2	GABRG2	5	16	112	4447	3.51e-05	0.00068362
CDH2	SUPT5H	7	13	263	4950	1.54e-06	5.55e-05
CDH2	PTBP3	7	13	263	4950	1.54e-06	5.55e-05
CDH2	GAA	7	13	333	4950	7.44e-06	0.000233262
CDH2	PRKAR1A	7	13	333	4950	7.44e-06	0.000233262
CDH2	PC	7	13	333	4950	7.44e-06	0.000233262
CDH2	MTHFD1	7	13	333	4950	7.44e-06	0.000233262
CDH2	PDIA4	7	13	333	4950	7.44e-06	0.000233262
CDH2	PTPN1	7	13	330	4950	7.01e-06	0.000226071
CDH2	PTPN6	7	13	330	4950	7.01e-06	0.000226071
CDH2	CTNNA1	7	13	333	4950	7.44e-06	0.000233262
CDH2	PTPN7	7	13	330	4950	7.01e-06	0.000226071
CDH2	PRPH	7	13	263	4950	1.54e-06	5.55e-05
CDH2	RPS26	7	13	333	4950	7.44e-06	0.000233262
CDH2	SPTBN1	7	13	263	4950	1.54e-06	5.55e-05
CDH2	GNA12	7	13	333	4950	7.44e-06	0.000233262
CDH2	GNA13	7	13	333	4950	7.44e-06	0.000233262
CDH2	DBN1	7	13	263	4950	1.54e-06	5.55e-05
CDH2	KTN1	7	13	263	4950	1.54e-06	5.55e-05
CDH2	FAM20C	7	13	263	4950	1.54e-06	5.55e-05
CDH2	TMEM256	7	13	263	4950	1.54e-06	5.55e-05
CDH2	PKP4	7	13	263	4950	1.54e-06	5.55e-05
CDH2	SARS2	7	13	333	4950	7.44e-06	0.000233262
CDH2	IARS2	7	13	333	4950	7.44e-06	0.000233262
CDH2	HEL-S-108	7	13	263	4950	1.54e-06	5.55e-05
CYP11B2	CYP11B2	4	10	144	2936	0.000956754	0.00845694
VCAM1	CNOT1	4	13	89	6049	3.01e-05	0.000621006
VCAM1	SMCHD1	4	13	89	6049	3.01e-05	0.000621006
VCAM1	NACA	4	13	89	6049	3.01e-05	0.000621006
VCAM1	PSMD12	4	13	89	6049	3.01e-05	0.000621006
VCAM1	HIP1	4	13	89	6049	3.01e-05	0.000621006
VCAM1	IPO5	4	13	89	6049	3.01e-05	0.000621006
VCAM1	PIK3R2	4	13	89	6049	3.01e-05	0.000621006
VCAM1	PES1	4	13	89	6049	3.01e-05	0.000621006
VCAM1	SDCBP	4	13	89	6049	3.01e-05	0.000621006
VCAM1	NOP56	4	13	89	6049	3.01e-05	0.000621006
VCAM1	PRMT5	4	13	89	6049	3.01e-05	0.000621006
VCAM1	TCERG1	4	13	89	6049	3.01e-05	0.000621006
VCAM1	XPO1	4	13	89	6049	3.01e-05	0.000621006
VCAM1	INPPL1	4	13	89	6049	3.01e-05	0.000621006
VCAM1	EIF3D	4	13	89	6049	3.01e-05	0.000621006
VCAM1	DHX15	4	13	89	6049	3.01e-05	0.000621006
VCAM1	PRPF3	4	13	89	6049	3.01e-05	0.000621006
VCAM1	ACTN4	4	13	89	6049	3.01e-05	0.000621006
VCAM1	DHX16	4	13	89	6049	3.01e-05	0.000621006
VCAM1	SMARCA5	4	13	89	6049	3.01e-05	0.000621006
VCAM1	SNX3	4	13	89	6049	3.01e-05	0.000621006
VCAM1	SYNCRIP	4	13	89	6049	3.01e-05	0.000621006
VCAM1	DIAPH1	4	13	89	6049	3.01e-05	0.000621006
VCAM1	HIP1R	4	13	89	6049	3.01e-05	0.000621006
VCAM1	ANKRD17	4	13	89	6049	3.01e-05	0.000621006
VCAM1	FLNB	4	13	89	6049	3.01e-05	0.000621006
VCAM1	NDUFS3	4	13	89	6049	3.01e-05	0.000621006
VCAM1	USP2	4	13	89	6049	3.01e-05	0.000621006
VCAM1	LYPLA1	4	13	89	6049	3.01e-05	0.000621006
VCAM1	SNRNP200	4	13	89	6049	3.01e-05	0.000621006
VCAM1	NUP155	4	13	89	6049	3.01e-05	0.000621006
VCAM1	RSL1D1	4	13	89	6049	3.01e-05	0.000621006
VCAM1	SEC31A	4	13	89	6049	3.01e-05	0.000621006
VCAM1	LYPLA2	4	13	89	6049	3.01e-05	0.000621006
VCAM1	IPO7	4	13	89	6049	3.01e-05	0.000621006
VCAM1	SNAP29	4	13	89	6049	3.01e-05	0.000621006
VCAM1	AP2A1	4	13	89	6049	3.01e-05	0.000621006
VCAM1	IGHG1	4	13	89	6049	3.01e-05	0.000621006
VCAM1	KRT6A	4	13	89	6049	3.01e-05	0.000621006
VCAM1	LMNA	4	13	89	6049	3.01e-05	0.000621006
VCAM1	APOE	4	13	89	6049	3.01e-05	0.000621006
VCAM1	TFRC	4	13	89	6049	3.01e-05	0.000621006
VCAM1	KRT1	4	13	89	6049	3.01e-05	0.000621006
VCAM1	CAPNS1	4	13	89	6049	3.01e-05	0.000621006
VCAM1	HSPB1	4	13	89	6049	3.01e-05	0.000621006
VCAM1	SLC25A5	4	13	89	6049	3.01e-05	0.000621006
VCAM1	ITGB1	4	13	89	6049	3.01e-05	0.000621006
VCAM1	KRT8	4	13	89	6049	3.01e-05	0.000621006
VCAM1	EIF4E	4	13	89	6049	3.01e-05	0.000621006
VCAM1	CTSD	4	13	89	6049	3.01e-05	0.000621006
VCAM1	CAPN1	4	13	89	6049	3.01e-05	0.000621006
VCAM1	TUBB	4	13	89	6049	3.01e-05	0.000621006
VCAM1	APRT	4	13	89	6049	3.01e-05	0.000621006
VCAM1	HSP90AA1	4	13	89	6049	3.01e-05	0.000621006
VCAM1	YES1	4	13	89	6049	3.01e-05	0.000621006
VCAM1	HSP90AB1	4	13	89	6049	3.01e-05	0.000621006
VCAM1	ASNS	4	13	89	6049	3.01e-05	0.000621006
VCAM1	ITGA5	4	13	89	6049	3.01e-05	0.000621006
VCAM1	HMGB1	4	13	89	6049	3.01e-05	0.000621006
VCAM1	CLTA	4	13	89	6049	3.01e-05	0.000621006
VCAM1	SNRPA1	4	13	89	6049	3.01e-05	0.000621006
VCAM1	PARP1	4	13	89	6049	3.01e-05	0.000621006
VCAM1	ESD	4	13	89	6049	3.01e-05	0.000621006
VCAM1	HSPA5	4	13	89	6049	3.01e-05	0.000621006
VCAM1	HSPA8	4	13	89	6049	3.01e-05	0.000621006
VCAM1	TOP1	4	13	89	6049	3.01e-05	0.000621006
VCAM1	TOP2A	4	13	89	6049	3.01e-05	0.000621006
VCAM1	MTHFD1	4	13	89	6049	3.01e-05	0.000621006
VCAM1	IGF2R	4	13	89	6049	3.01e-05	0.000621006
VCAM1	PABPC1	4	13	89	6049	3.01e-05	0.000621006
VCAM1	TPR	4	13	89	6049	3.01e-05	0.000621006
VCAM1	XRCC6	4	13	89	6049	3.01e-05	0.000621006
VCAM1	XRCC5	4	13	89	6049	3.01e-05	0.000621006
VCAM1	ITGA4	4	13	89	6049	3.01e-05	0.000621006
VCAM1	EEF2	4	13	89	6049	3.01e-05	0.000621006
VCAM1	KRT10	4	13	89	6049	3.01e-05	0.000621006
VCAM1	HNRNPL	4	13	89	6049	3.01e-05	0.000621006
VCAM1	PFKL	4	13	89	6049	3.01e-05	0.000621006
VCAM1	TCP1	4	13	89	6049	3.01e-05	0.000621006
VCAM1	VCL	4	13	89	6049	3.01e-05	0.000621006
VCAM1	NCL	4	13	89	6049	3.01e-05	0.000621006
VCAM1	FLNA	4	13	89	6049	3.01e-05	0.000621006
VCAM1	GART	4	13	89	6049	3.01e-05	0.000621006
VCAM1	CBL	4	13	89	6049	3.01e-05	0.000621006
VCAM1	SFPQ	4	13	89	6049	3.01e-05	0.000621006
VCAM1	MCM3	4	13	89	6049	3.01e-05	0.000621006
VCAM1	ATP5F1A	4	13	89	6049	3.01e-05	0.000621006
VCAM1	DDX6	4	13	89	6049	3.01e-05	0.000621006
VCAM1	DNMT1	4	13	89	6049	3.01e-05	0.000621006
VCAM1	U2AF2	4	13	89	6049	3.01e-05	0.000621006
VCAM1	HMGB2	3	13	30	6049	3.36e-05	0.000663948
VCAM1	CAD	4	13	89	6049	3.01e-05	0.000621006
VCAM1	MAP4	4	13	89	6049	3.01e-05	0.000621006
VCAM1	NDUFS1	4	13	89	6049	3.01e-05	0.000621006
VCAM1	PPP2R1A	4	13	89	6049	3.01e-05	0.000621006
VCAM1	SDHA	4	13	89	6049	3.01e-05	0.000621006
VCAM1	HNRNPH1	4	13	89	6049	3.01e-05	0.000621006
VCAM1	STIP1	4	13	89	6049	3.01e-05	0.000621006
VCAM1	MCM4	4	13	89	6049	3.01e-05	0.000621006
VCAM1	MCM5	4	13	89	6049	3.01e-05	0.000621006
VCAM1	MCM7	4	13	89	6049	3.01e-05	0.000621006
VCAM1	KRT9	4	13	89	6049	3.01e-05	0.000621006
VCAM1	MYH9	4	13	89	6049	3.01e-05	0.000621006
VCAM1	MYH10	4	13	89	6049	3.01e-05	0.000621006
VCAM1	FUS	4	13	89	6049	3.01e-05	0.000621006
VCAM1	NUP214	4	13	89	6049	3.01e-05	0.000621006
VCAM1	KRT2	4	13	89	6049	3.01e-05	0.000621006
VCAM1	LONP1	4	13	89	6049	3.01e-05	0.000621006
VCAM1	HSPA9	4	13	89	6049	3.01e-05	0.000621006
VCAM1	HADHA	4	13	89	6049	3.01e-05	0.000621006
VCAM1	IARS1	4	13	89	6049	3.01e-05	0.000621006
VCAM1	TMPO	4	13	89	6049	3.01e-05	0.000621006
VCAM1	PI4KA	4	13	89	6049	3.01e-05	0.000621006
VCAM1	EPS15	4	13	89	6049	3.01e-05	0.000621006
VCAM1	LRPPRC	4	13	89	6049	3.01e-05	0.000621006
VCAM1	MATR3	4	13	89	6049	3.01e-05	0.000621006
VCAM1	SYK	4	13	89	6049	3.01e-05	0.000621006
VCAM1	RPS5	4	13	89	6049	3.01e-05	0.000621006
VCAM1	IQGAP1	4	13	89	6049	3.01e-05	0.000621006
VCAM1	QARS1	4	13	89	6049	3.01e-05	0.000621006
VCAM1	PXN	4	13	89	6049	3.01e-05	0.000621006
VCAM1	FASN	4	13	89	6049	3.01e-05	0.000621006
VCAM1	CCT3	4	13	89	6049	3.01e-05	0.000621006
VCAM1	TUFM	4	13	89	6049	3.01e-05	0.000621006
VCAM1	AARS1	4	13	89	6049	3.01e-05	0.000621006
VCAM1	SARS1	4	13	89	6049	3.01e-05	0.000621006
VCAM1	MCM2	4	13	89	6049	3.01e-05	0.000621006
VCAM1	GMPS	4	13	89	6049	3.01e-05	0.000621006
VCAM1	EMD	4	13	89	6049	3.01e-05	0.000621006
VCAM1	DNM2	4	13	89	6049	3.01e-05	0.000621006
VCAM1	CCT8	4	13	89	6049	3.01e-05	0.000621006
VCAM1	SMARCA4	4	13	89	6049	3.01e-05	0.000621006
VCAM1	STAT5B	4	13	89	6049	3.01e-05	0.000621006
VCAM1	HNRNPM	4	13	89	6049	3.01e-05	0.000621006
VCAM1	AGFG1	4	13	89	6049	3.01e-05	0.000621006
VCAM1	HNRNPF	4	13	89	6049	3.01e-05	0.000621006
VCAM1	HK2	4	13	89	6049	3.01e-05	0.000621006
VCAM1	COPA	4	13	89	6049	3.01e-05	0.000621006
VCAM1	SEC24C	4	13	89	6049	3.01e-05	0.000621006
VCAM1	ALDH18A1	4	13	89	6049	3.01e-05	0.000621006
VCAM1	CSE1L	4	13	89	6049	3.01e-05	0.000621006
VCAM1	VCP	4	13	89	6049	3.01e-05	0.000621006
VCAM1	AFDN	4	13	89	6049	3.01e-05	0.000621006
VCAM1	EIF3B	4	13	89	6049	3.01e-05	0.000621006
VCAM1	MARS1	4	13	89	6049	3.01e-05	0.000621006
VCAM1	EIF3E	4	13	89	6049	3.01e-05	0.000621006
VCAM1	UBE2M	4	13	89	6049	3.01e-05	0.000621006
VCAM1	ACTR3	4	13	89	6049	3.01e-05	0.000621006
VCAM1	ABCE1	4	13	89	6049	3.01e-05	0.000621006
VCAM1	YWHAG	3	13	45	6049	0.000111351	0.0017859
VCAM1	SNRPD3	4	13	89	6049	3.01e-05	0.000621006
VCAM1	RPL23	4	13	89	6049	3.01e-05	0.000621006
VCAM1	RPS28	4	13	89	6049	3.01e-05	0.000621006
VCAM1	AP2B1	4	13	89	6049	3.01e-05	0.000621006
VCAM1	YWHAZ	3	13	40	6049	7.87e-05	0.00135322
VCAM1	TUBB4B	4	13	89	6049	3.01e-05	0.000621006
VCAM1	HBG1	4	13	89	6049	3.01e-05	0.000621006
VCAM1	HBG2	4	13	89	6049	3.01e-05	0.000621006
VCAM1	HBA1	4	13	89	6049	3.01e-05	0.000621006
VCAM1	EIF4G2	4	13	89	6049	3.01e-05	0.000621006
VCAM1	PRKDC	4	13	89	6049	3.01e-05	0.000621006
VCAM1	CLTC	4	13	89	6049	3.01e-05	0.000621006
VCAM1	HNRNPU	4	13	89	6049	3.01e-05	0.000621006
VCAM1	SPTBN1	4	13	89	6049	3.01e-05	0.000621006
VCAM1	TIAL1	3	13	40	6049	7.87e-05	0.00135322
VCAM1	PFKP	4	13	89	6049	3.01e-05	0.000621006
VCAM1	EIF4G1	4	13	89	6049	3.01e-05	0.000621006
VCAM1	PTPN11	4	13	89	6049	3.01e-05	0.000621006
VCAM1	SSRP1	4	13	89	6049	3.01e-05	0.000621006
VCAM1	NSUN2	4	13	89	6049	3.01e-05	0.000621006
VCAM1	SCAP	4	13	89	6049	3.01e-05	0.000621006
VCAM1	ILF3	4	13	89	6049	3.01e-05	0.000621006
VCAM1	TRAP1	4	13	89	6049	3.01e-05	0.000621006
VCAM1	COASY	4	13	89	6049	3.01e-05	0.000621006
VCAM1	TARDBP	4	13	89	6049	3.01e-05	0.000621006
VCAM1	PSMD2	4	13	89	6049	3.01e-05	0.000621006
VCAM1	TRIM28	4	13	89	6049	3.01e-05	0.000621006
VCAM1	PABPC4	4	13	89	6049	3.01e-05	0.000621006
VCAM1	EIF3I	3	13	41	6049	8.46e-05	0.00140222
VCAM1	PICALM	4	13	89	6049	3.01e-05	0.000621006
VCAM1	EIF3A	4	13	89	6049	3.01e-05	0.000621006
VCAM1	UBAP2L	4	13	89	6049	3.01e-05	0.000621006
VCAM1	SCRIB	4	13	89	6049	3.01e-05	0.000621006
VCAM1	TTLL12	4	13	89	6049	3.01e-05	0.000621006
VCAM1	DYNC1H1	4	13	89	6049	3.01e-05	0.000621006
VCAM1	FLNC	4	13	89	6049	3.01e-05	0.000621006
VCAM1	CAPRIN1	4	13	89	6049	3.01e-05	0.000621006
VCAM1	MCM6	4	13	89	6049	3.01e-05	0.000621006
VCAM1	PUM1	4	13	89	6049	3.01e-05	0.000621006
VCAM1	GANAB	4	13	89	6049	3.01e-05	0.000621006
VCAM1	CHD4	4	13	89	6049	3.01e-05	0.000621006
VCAM1	KPNB1	4	13	89	6049	3.01e-05	0.000621006
VCAM1	SART3	4	13	89	6049	3.01e-05	0.000621006
VCAM1	EFTUD2	4	13	89	6049	3.01e-05	0.000621006
VCAM1	PLEC	4	13	89	6049	3.01e-05	0.000621006
VCAM1	PCM1	4	13	89	6049	3.01e-05	0.000621006
VCAM1	SF3B3	4	13	89	6049	3.01e-05	0.000621006
VCAM1	SF1	4	13	89	6049	3.01e-05	0.000621006
VCAM1	DBN1	4	13	89	6049	3.01e-05	0.000621006
VCAM1	IMMT	4	13	89	6049	3.01e-05	0.000621006
VCAM1	ACSM3	4	13	89	6049	3.01e-05	0.000621006
VCAM1	NUP188	4	13	89	6049	3.01e-05	0.000621006
VCAM1	HP1BP3	4	13	89	6049	3.01e-05	0.000621006
VCAM1	UBR4	4	13	89	6049	3.01e-05	0.000621006
VCAM1	EDC4	4	13	89	6049	3.01e-05	0.000621006
VCAM1	PRPF8	4	13	89	6049	3.01e-05	0.000621006
VCAM1	LARP1	4	13	89	6049	3.01e-05	0.000621006
VCAM1	ADAMTSL4	4	13	89	6049	3.01e-05	0.000621006
VCAM1	SND1	4	13	89	6049	3.01e-05	0.000621006
VCAM1	DHX30	4	13	89	6049	3.01e-05	0.000621006
VCAM1	PHF5A	4	13	89	6049	3.01e-05	0.000621006
VCAM1	FERMT3	4	13	89	6049	3.01e-05	0.000621006
VCAM1	DDX42	4	13	89	6049	3.01e-05	0.000621006
VCAM1	ANKHD1	4	13	89	6049	3.01e-05	0.000621006
VCAM1	CCAR1	4	13	89	6049	3.01e-05	0.000621006
VCAM1	RAVER1	4	13	89	6049	3.01e-05	0.000621006
VCAM1	CCAR2	4	13	89	6049	3.01e-05	0.000621006
VCAM1	NUP93	4	13	89	6049	3.01e-05	0.000621006
VCAM1	THOC2	4	13	89	6049	3.01e-05	0.000621006
VCAM1	WDR36	4	13	89	6049	3.01e-05	0.000621006
VCAM1	TBC1D15	4	13	89	6049	3.01e-05	0.000621006
VCAM1	NUP210	4	13	89	6049	3.01e-05	0.000621006
VCAM1	PDCD6IP	4	13	89	6049	3.01e-05	0.000621006
VCAM1	ATXN2L	4	13	89	6049	3.01e-05	0.000621006
VCAM1	STON2	4	13	89	6049	3.01e-05	0.000621006
VCAM1	DDX1	4	13	89	6049	3.01e-05	0.000621006
VCAM1	H1-10	4	13	89	6049	3.01e-05	0.000621006
VCAM1	MYO18A	4	13	89	6049	3.01e-05	0.000621006
VCAM1	GCN1	4	13	89	6049	3.01e-05	0.000621006
VCAM1	NUP205	4	13	89	6049	3.01e-05	0.000621006
VCAM1	DDX17	4	13	89	6049	3.01e-05	0.000621006
VCAM1	UPF1	4	13	89	6049	3.01e-05	0.000621006
VCAM1	KHSRP	4	13	89	6049	3.01e-05	0.000621006
VCAM1	TNPO1	4	13	89	6049	3.01e-05	0.000621006
VCAM1	FUBP1	4	13	89	6049	3.01e-05	0.000621006
VCAM1	MSI2	3	13	40	6049	7.87e-05	0.00135322
VCAM1	ARAP1	4	13	89	6049	3.01e-05	0.000621006
VCAM1	RBM14	4	13	89	6049	3.01e-05	0.000621006
VCAM1	VPS35	4	13	89	6049	3.01e-05	0.000621006
VCAM1	EIF3C	4	13	89	6049	3.01e-05	0.000621006
VCAM1	KIF2C	4	13	89	6049	3.01e-05	0.000621006
VCAM1	ACO2	4	13	89	6049	3.01e-05	0.000621006
VCAM1	CCT7	4	13	89	6049	3.01e-05	0.000621006
VCAM1	MACROD1	4	13	89	6049	3.01e-05	0.000621006
VCAM1	MYBBP1A	4	13	89	6049	3.01e-05	0.000621006
VCAM1	ESYT1	4	13	89	6049	3.01e-05	0.000621006
VCAM1	TUBB6	4	13	89	6049	3.01e-05	0.000621006
VCAM1	NAA15	4	13	89	6049	3.01e-05	0.000621006
VCAM1	GTPBP4	4	13	89	6049	3.01e-05	0.000621006
VCAM1	NAT10	4	13	89	6049	3.01e-05	0.000621006
VCAM1	PTPN23	4	13	89	6049	3.01e-05	0.000621006
VCAM1	HEATR1	4	13	89	6049	3.01e-05	0.000621006
VCAM1	XPO5	4	13	89	6049	3.01e-05	0.000621006
VCAM1	DDX21	4	13	89	6049	3.01e-05	0.000621006
VCAM1	FARSB	4	13	89	6049	3.01e-05	0.000621006
VCAM1	MDN1	4	13	89	6049	3.01e-05	0.000621006
VCAM1	ATAD3A	4	13	89	6049	3.01e-05	0.000621006
VCAM1	DDX18	4	13	89	6049	3.01e-05	0.000621006
VCAM1	ITSN2	4	13	89	6049	3.01e-05	0.000621006
VCAM1	RCC2	4	13	89	6049	3.01e-05	0.000621006
VCAM1	EPS15L1	4	13	89	6049	3.01e-05	0.000621006
VCAM1	SEPTIN9	4	13	89	6049	3.01e-05	0.000621006
VCAM1	KIDINS220	4	13	89	6049	3.01e-05	0.000621006
VCAM1	MACF1	4	13	89	6049	3.01e-05	0.000621006
VCAM1	EIF3L	4	13	89	6049	3.01e-05	0.000621006
VCAM1	SF3B6	4	13	89	6049	3.01e-05	0.000621006
VCAM1	TLN1	4	13	89	6049	3.01e-05	0.000621006
VCAM1	PRRC2C	4	13	89	6049	3.01e-05	0.000621006
VCAM1	YTHDF2	4	13	89	6049	3.01e-05	0.000621006
VCAM1	UTP18	4	13	89	6049	3.01e-05	0.000621006
VCAM1	CD2AP	4	13	89	6049	3.01e-05	0.000621006
VCAM1	IGF2BP2	4	13	89	6049	3.01e-05	0.000621006
VCAM1	HEL70	4	13	89	6049	3.01e-05	0.000621006
NCL	SUPT5H	4	4	208	6929	8.12e-07	3.03e-05
NCL	TAF4	4	4	208	6929	8.12e-07	3.03e-05
NCL	RFXAP	4	4	208	6929	8.12e-07	3.03e-05
NCL	PLOD2	4	4	208	6929	8.12e-07	3.03e-05
NCL	TERT	4	4	208	6929	8.12e-07	3.03e-05
NCL	POLR1C	4	4	140	6929	1.67e-07	9.3e-06
NCL	EIF3D	4	4	208	6929	8.12e-07	3.03e-05
NCL	EIF5B	4	4	208	6929	8.12e-07	3.03e-05
NCL	NPM3	4	4	144	6929	1.87e-07	1e-05
NCL	ADAP1	4	4	138	6929	1.57e-07	8.91e-06
NCL	EIF3G	4	4	208	6929	8.12e-07	3.03e-05
NCL	FOS	4	4	133	6929	1.36e-07	8.01e-06
NCL	LMNA	4	4	208	6929	8.12e-07	3.03e-05
NCL	FN1	4	4	208	6929	8.12e-07	3.03e-05
NCL	LTF	4	4	208	6929	8.12e-07	3.03e-05
NCL	ESR1	4	4	208	6929	8.12e-07	3.03e-05
NCL	NR3C1	4	4	208	6929	8.12e-07	3.03e-05
NCL	TP53	4	4	208	6929	8.12e-07	3.03e-05
NCL	RB1	4	4	208	6929	8.12e-07	3.03e-05
NCL	CDK1	4	4	208	6929	8.12e-07	3.03e-05
NCL	NPM1	4	4	137	6929	1.53e-07	8.68e-06
NCL	MYBL1	4	4	208	6929	8.12e-07	3.03e-05
NCL	PRKAR1A	4	4	134	6929	1.4e-07	8.21e-06
NCL	TOP1	4	4	208	6929	8.12e-07	3.03e-05
NCL	XRCC5	4	4	208	6929	8.12e-07	3.03e-05
NCL	ETS1	4	4	208	6929	8.12e-07	3.03e-05
NCL	RPS2	4	4	137	6929	1.53e-07	8.68e-06
NCL	TCF3	4	4	208	6929	8.12e-07	3.03e-05
NCL	HMGA1	4	4	208	6929	8.12e-07	3.03e-05
NCL	RPL7	4	4	146	6929	1.97e-07	1.05e-05
NCL	VCAM1	4	4	208	6929	8.12e-07	3.03e-05
NCL	NCL	4	4	208	6929	8.12e-07	3.03e-05
NCL	CSNK2A2	4	4	140	6929	1.67e-07	9.3e-06
NCL	UQCRC2	4	4	144	6929	1.87e-07	1e-05
NCL	YY1	4	4	208	6929	8.12e-07	3.03e-05
NCL	PTBP1	4	4	140	6929	1.67e-07	9.3e-06
NCL	ZFP36	4	4	140	6929	1.67e-07	9.3e-06
NCL	CDC27	4	4	208	6929	8.12e-07	3.03e-05
NCL	RPL9	4	4	137	6929	1.53e-07	8.68e-06
NCL	RDX	4	4	208	6929	8.12e-07	3.03e-05
NCL	GTF2F1	4	4	208	6929	8.12e-07	3.03e-05
NCL	RPL4	4	4	135	6929	1.44e-07	8.39e-06
NCL	RPS19	4	4	208	6929	8.12e-07	3.03e-05
NCL	RPL3	4	4	144	6929	1.87e-07	1e-05
NCL	COL18A1	4	4	208	6929	8.12e-07	3.03e-05
NCL	CDKN2A	4	4	140	6929	1.67e-07	9.3e-06
NCL	RPL5	4	4	141	6929	1.71e-07	9.47e-06
NCL	RPL21	4	4	141	6929	1.71e-07	9.47e-06
NCL	RPS5	4	4	208	6929	8.12e-07	3.03e-05
NCL	MCM2	4	4	208	6929	8.12e-07	3.03e-05
NCL	CLK1	4	4	208	6929	8.12e-07	3.03e-05
NCL	RPL14	4	4	143	6929	1.81e-07	9.84e-06
NCL	ACLY	4	4	208	6929	8.12e-07	3.03e-05
NCL	OXCT1	4	4	208	6929	8.12e-07	3.03e-05
NCL	ACTB	4	4	136	6929	1.48e-07	8.52e-06
NCL	RAC3	4	4	148	6929	2.08e-07	1.1e-05
NCL	RPS3A	4	4	130	6929	1.24e-07	7.43e-06
NCL	RPL15	4	4	147	6929	2.03e-07	1.07e-05
NCL	PCBD1	4	4	141	6929	1.71e-07	9.47e-06
NCL	RHOA	4	4	137	6929	1.53e-07	8.68e-06
NCL	RPS8	4	4	135	6929	1.44e-07	8.39e-06
NCL	RPS16	4	4	141	6929	1.71e-07	9.47e-06
NCL	RPS23	4	4	208	6929	8.12e-07	3.03e-05
NCL	RPL7A	4	4	147	6929	2.03e-07	1.07e-05
NCL	RPS4X	4	4	135	6929	1.44e-07	8.39e-06
NCL	RPS6	4	4	156	6929	2.57e-07	1.32e-05
NCL	RPS24	4	4	208	6929	8.12e-07	3.03e-05
NCL	RPS26	4	4	208	6929	8.12e-07	3.03e-05
NCL	RPL11	4	4	136	6929	1.48e-07	8.52e-06
NCL	RPL8	4	4	131	6929	1.28e-07	7.65e-06
NCL	SUPT4H1	4	4	208	6929	8.12e-07	3.03e-05
NCL	CSNK2A1	4	4	138	6929	1.57e-07	8.91e-06
NCL	SRPK2	4	4	145	6929	1.92e-07	1.02e-05
NCL	RPL19	4	4	208	6929	8.12e-07	3.03e-05
NCL	MDM2	4	4	143	6929	1.81e-07	9.84e-06
NCL	SRSF2	4	4	208	6929	8.12e-07	3.03e-05
NCL	RPL18A	4	4	145	6929	1.92e-07	1.02e-05
NCL	RPL6	4	4	141	6929	1.71e-07	9.47e-06
NCL	KMT2A	4	4	208	6929	8.12e-07	3.03e-05
NCL	DNM1	4	4	208	6929	8.12e-07	3.03e-05
NCL	PRKCZ	4	4	208	6929	8.12e-07	3.03e-05
NCL	PAX8	4	4	142	6929	1.76e-07	9.71e-06
NCL	RPL18	4	4	208	6929	8.12e-07	3.03e-05
NCL	NCBP1	4	4	208	6929	8.12e-07	3.03e-05
NCL	ILF3	4	4	208	6929	8.12e-07	3.03e-05
NCL	SRSF5	4	4	142	6929	1.76e-07	9.71e-06
NCL	EIF3A	4	4	208	6929	8.12e-07	3.03e-05
NCL	KPNB1	4	4	208	6929	8.12e-07	3.03e-05
NCL	WDR43	4	4	208	6929	8.12e-07	3.03e-05
NCL	SF3B4	4	4	135	6929	1.44e-07	8.39e-06
NCL	TERF2	4	4	208	6929	8.12e-07	3.03e-05
NCL	PTMAP7	4	4	208	6929	8.12e-07	3.03e-05
NCL	HNRNPK	4	4	145	6929	1.92e-07	1.02e-05
NCL	SUPT6H	4	4	208	6929	8.12e-07	3.03e-05
NCL	PHF5A	4	4	208	6929	8.12e-07	3.03e-05
NCL	APTX	4	4	141	6929	1.71e-07	9.47e-06
NCL	SERBP1	4	4	139	6929	1.62e-07	9.14e-06
NCL	RBM46	4	4	143	6929	1.81e-07	9.84e-06
NCL	PNPT1	4	4	208	6929	8.12e-07	3.03e-05
NCL	SREK1	4	4	208	6929	8.12e-07	3.03e-05
NCL	DGCR8	4	4	208	6929	8.12e-07	3.03e-05
NCL	ANP32B	4	4	144	6929	1.87e-07	1e-05
NCL	KCTD12	4	4	152	6929	2.32e-07	1.2e-05
NCL	NDN	4	4	137	6929	1.53e-07	8.68e-06
NCL	EIF3C	4	4	208	6929	8.12e-07	3.03e-05
NCL	NAP1L4	4	4	140	6929	1.67e-07	9.3e-06
NCL	EBNA1BP2	4	4	146	6929	1.97e-07	1.05e-05
NCL	PRMT1	4	4	144	6929	1.87e-07	1e-05
NCL	RBM42	4	4	208	6929	8.12e-07	3.03e-05
NCL	MRPS26	4	4	208	6929	8.12e-07	3.03e-05
NCL	ANAPC1	4	4	208	6929	8.12e-07	3.03e-05
NCL	DAXX	4	4	208	6929	8.12e-07	3.03e-05
NCL	SWAP70	4	4	208	6929	8.12e-07	3.03e-05
NCL	SEPTIN9	4	4	208	6929	8.12e-07	3.03e-05
NCL	ANAPC7	4	4	155	6929	2.5e-07	1.29e-05
NCL	EIF3L	4	4	143	6929	1.81e-07	9.84e-06
NCL	DCAF1	4	4	208	6929	8.12e-07	3.03e-05
NCL	HEL-S-310	4	4	144	6929	1.87e-07	1e-05
NCL	HEL-S-84	4	4	143	6929	1.81e-07	9.84e-06
NCF2	CYBB	3	3	98	2928	3.75e-05	0.00072589
NCF2	CYBA	2	3	45	2928	0.000701345	0.00674033
NCF2	PRDX6	2	3	44	2928	0.000670674	0.006498
NCF2	ACTB	2	3	49	2928	0.000830804	0.00763101
NCF2	PRKDC	3	3	98	2928	3.75e-05	0.00072589
NCF2	PRKCD	2	3	54	2928	0.00100785	0.00879731
NCF2	GOLGA2	3	3	98	2928	3.75e-05	0.00072589
NCF2	NCF4	3	3	93	2928	3.2e-05	0.000649283
NCF2	KIFAP3	3	3	98	2928	3.75e-05	0.00072589
NCF2	HEL-S-128m	2	3	44	2928	0.000670674	0.006498
PTN	NEK6	3	4	79	1713	0.000378775	0.00453438
MAOA	A2M	2	2	121	4213	0.000824874	0.00759172
RYR1	TULP3	6	33	253	15968	1.21e-05	0.000357534
RYR1	NCK1	6	33	253	15968	1.21e-05	0.000357534
RYR1	PRKACA	6	33	253	15968	1.21e-05	0.000357534
RYR1	PLCG1	6	33	253	15968	1.21e-05	0.000357534
RYR1	MYOM2	6	33	253	15968	1.21e-05	0.000357534
RYR1	PPP1CA	6	33	353	15968	7.73e-05	0.00133284
RYR1	FKBP1A	6	33	253	15968	1.21e-05	0.000357534
RYR1	GRB2	6	33	253	15968	1.21e-05	0.000357534
RYR1	PPP2CA	6	33	353	15968	7.73e-05	0.00133284
RYR1	TRDN	6	33	253	15968	1.21e-05	0.000357534
RYR1	CACNA1S	6	33	253	15968	1.21e-05	0.000357534
RYR1	PRKG1	6	33	253	15968	1.21e-05	0.000357534
RYR1	PDLIM3	6	33	253	15968	1.21e-05	0.000357534
RYR1	HOMER1	6	33	253	15968	1.21e-05	0.000357534
RYR1	TTN	6	33	253	15968	1.21e-05	0.000357534
BCKDHB	BCKDHA	4	6	75	4102	1.63e-06	5.85e-05
KCNA4	SAT1	6	12	235	4195	2.13e-05	0.00059952
KCNA5	HSP90AB1	6	9	302	2865	8.68e-05	0.00143195
KCNA5	KCNA3	6	9	302	2865	8.68e-05	0.00143195
KCNA5	KCNA5	6	9	302	2865	8.68e-05	0.00143195
KCNA5	PTPRE	6	9	302	2865	8.68e-05	0.00143195
KCNA5	ACTN2	6	9	302	2865	8.68e-05	0.00143195
KCNA5	UBE2I	6	9	302	2865	8.68e-05	0.00143195
KCNA5	DLG4	6	9	293	2865	7.3e-05	0.00127739
KCNA5	TNK2	6	9	293	2865	7.3e-05	0.00127739
KCNA5	DLG1	6	9	293	2865	7.3e-05	0.00127739
KCNA5	SCRIB	6	9	293	2865	7.3e-05	0.00127739
KCNA5	DKFZp686O0451	6	9	293	2865	7.3e-05	0.00127739
KCNA5	ERBIN	6	9	293	2865	7.3e-05	0.00127739
PRKACB	HSP90AB1	2	3	113	6676	0.0008498	0.00778888
GLRA2	PSD	4	8	212	3713	0.000617409	0.00619932
GLRA2	BAG6	4	8	212	3713	0.000617409	0.00619932
GLRA2	GDI2	5	8	246	3713	6.03e-05	0.00108644
GLRA2	SEC23A	5	8	246	3713	6.03e-05	0.00108644
GLRA2	DDX24	4	8	212	3713	0.000617409	0.00619932
GLRA2	GPR108	4	8	212	3713	0.000617409	0.00619932
PTPRD	MTSS1	6	28	376	11081	0.00030174	0.00399466
PTPRD	PTPRA	6	28	376	11081	0.00030174	0.00399466
PTPRD	STAT3	6	28	376	11081	0.00030174	0.00399466
PTPRD	MTNR1A	6	28	376	11081	0.00030174	0.00399466
PTPRD	MTNR1B	6	28	376	11081	0.00030174	0.00399466
PTPRD	MDM2	6	28	376	11081	0.00030174	0.00399466
PTPRG	PDPK1	2	3	273	14629	0.00103176	0.00893094
PTPRG	PPFIA3	2	3	273	14629	0.00103176	0.00893094
PTPRG	PPFIA2	2	3	273	14629	0.00103176	0.00893094
PTPRG	ERBB2	2	3	273	14629	0.00103176	0.00893094
PTPRG	NTRK1	2	3	273	14629	0.00103176	0.00893094
PTPRG	INSR	2	3	273	14629	0.00103176	0.00893094
PTPRG	MET	2	3	273	14629	0.00103176	0.00893094
PTPRG	PDGFRB	2	3	273	14629	0.00103176	0.00893094
PTPRG	CDH2	2	3	273	14629	0.00103176	0.00893094
PTPRG	EPOR	2	3	273	14629	0.00103176	0.00893094
PTPRG	CBL	2	3	273	14629	0.00103176	0.00893094
PTPRG	MAPK3	2	3	273	14629	0.00103176	0.00893094
PTPRG	CTNNB1	2	3	273	14629	0.00103176	0.00893094
PTPRG	TIE1	2	3	273	14629	0.00103176	0.00893094
PTPRG	CSK	2	3	273	14629	0.00103176	0.00893094
PTPRG	TEC	2	3	273	14629	0.00103176	0.00893094
PTPRG	WAS	2	3	273	14629	0.00103176	0.00893094
PTPRG	NSF	2	3	273	14629	0.00103176	0.00893094
PTPRG	PXN	2	3	273	14629	0.00103176	0.00893094
PTPRG	DLG4	2	3	273	14629	0.00103176	0.00893094
PTPRG	TEK	2	3	273	14629	0.00103176	0.00893094
PTPRG	PPFIA1	2	3	273	14629	0.00103176	0.00893094
PTPRG	GRIN2B	2	3	273	14629	0.00103176	0.00893094
PTPRG	GAB1	2	3	273	14629	0.00103176	0.00893094
PTPRG	ALK	2	3	273	14629	0.00103176	0.00893094
RRM1	DNASE2	2	3	80	4178	0.00108589	0.00926968
RRM1	LRIF1	2	3	80	4178	0.00108589	0.00926968
RRM1	RIF1	2	3	80	4178	0.00108589	0.00926968
COL8A2	SGTA	2	2	119	4670	0.000649322	0.00631014
LMO2	AXIN1	2	2	102	3109	0.00107636	0.00920059
LMO2	ZNF24	2	2	102	3109	0.00107636	0.00920059
LMO2	SOX5	2	2	102	3109	0.00107636	0.00920059
LMO2	KRTAP10-7	2	2	102	3109	0.00107636	0.00920059
LMO2	GOLGA2	2	2	102	3109	0.00107636	0.00920059
LMO2	BRME1	2	2	102	3109	0.00107636	0.00920059
LMO2	ROCK1	2	2	102	3109	0.00107636	0.00920059
LMO2	MTUS2	2	2	102	3109	0.00107636	0.00920059
LMO2	KANK2	2	2	102	3109	0.00107636	0.00920059
LMO2	KRT40	2	2	102	3109	0.00107636	0.00920059
LMO2	C1orf94	2	2	102	3109	0.00107636	0.00920059
LMO2	ADAMTSL4	2	2	102	3109	0.00107636	0.00920059
LMO2	NUTM1	2	2	102	3109	0.00107636	0.00920059
LMO2	PHC2	2	2	102	3109	0.00107636	0.00920059
LMO2	IHO1	2	2	102	3109	0.00107636	0.00920059
LMO2	CCDC33	2	2	102	3109	0.00107636	0.00920059
LMO2	PP2150	2	2	102	3109	0.00107636	0.00920059
LMO2	CMTM5	2	2	102	3109	0.00107636	0.00920059
LMO2	MRFAP1L1	2	2	102	3109	0.00107636	0.00920059
LMO2	EHMT2	2	2	102	3109	0.00107636	0.00920059
LMO2	ERBIN	2	2	102	3109	0.00107636	0.00920059
LMO2	LZTS2	2	2	102	3109	0.00107636	0.00920059
LMO2	DKFZp761H172	2	2	102	3109	0.00107636	0.00920059
LMO2	hCG_33128	2	2	102	3109	0.00107636	0.00920059
LMO2	TSC22D4	2	2	102	3109	0.00107636	0.00920059
NPY1R	ATP13A2	4	5	118	4180	3.1e-06	0.000105168
PTPN3	ERBB2	3	4	82	10071	2.15e-06	7.37e-05
PTPN3	MET	3	4	82	10071	2.15e-06	7.37e-05
PTPN3	GHR	3	4	78	10071	1.85e-06	6.57e-05
PTPN3	LMO1	3	4	82	10071	2.15e-06	7.37e-05
PTPN3	AKT1	3	4	78	10071	1.85e-06	6.57e-05
PTPN3	YWHAG	3	4	82	10071	2.15e-06	7.37e-05
PTPN3	ADAM17	3	4	78	10071	1.85e-06	6.57e-05
PTPN3	AKR1C1	3	4	82	10071	2.15e-06	7.37e-05
PTPN3	SCN5A	3	4	78	10071	1.85e-06	6.57e-05
PTPN3	DIP2A	3	4	82	10071	2.15e-06	7.37e-05
PTPN3	ZCCHC10	3	4	82	10071	2.15e-06	7.37e-05
PTPN3	ZNF512B	3	4	82	10071	2.15e-06	7.37e-05
PTPN3	PRKD2	3	4	82	10071	2.15e-06	7.37e-05
PTPN3	WDR6	3	4	82	10071	2.15e-06	7.37e-05
PTPN3	NXT2	3	4	82	10071	2.15e-06	7.37e-05
CTNNA2	JUP	7	23	336	7538	4.55e-05	0.000844731
CTNNA2	CTNNB1	7	23	336	7538	4.55e-05	0.000844731
PAX6	DIAPH1	2	4	148	14776	0.000593942	0.00610164
PAX6	HOXB1	2	4	128	14776	0.00044507	0.00504249
PAX6	PBX1	2	4	124	14776	0.000417839	0.00491818
PAX6	SOX10	2	4	131	14776	0.000466051	0.00509905
PAX6	SUMO1	2	4	129	14776	0.000452011	0.00504249
PAX6	DYNLL1	2	4	125	14776	0.000424567	0.0049846
PAX6	DNCL1	2	4	125	14776	0.000424567	0.0049846
PAX6	TRIM11	2	4	148	14776	0.000593942	0.00610164
PAX6	HIPK2	2	4	148	14776	0.000593942	0.00610164
PAX6	HOMER3	2	4	127	14776	0.000438183	0.00504249
CHAT	PRKCA	3	4	189	3100	0.000865035	0.00790478
CHAT	CAMK2A	3	4	189	3100	0.000865035	0.00790478
MSX1	SUMO1	1	1	2	2120	0.000943396	0.00836877
GABRB3	GABRB3	3	6	121	8993	4.73e-05	0.000874868
GABRB3	UBQLN1	3	6	102	8993	2.84e-05	0.000621006
GABRB3	ARFGEF2	3	6	211	8993	0.00024494	0.00348202
MAPK1	RPS6KA3	1	1	11	11336	0.00097036	0.00856073
MAPK1	MTPN	1	1	12	11336	0.00105857	0.00912371
MAPK1	MAPK14	1	1	13	11336	0.00114679	0.00972805
MAPK1	DKFZp761E1322	1	1	11	11336	0.00097036	0.00856073
SHC1	GH1	2	2	136	4342	0.000981066	0.0086315
SHC1	NPM1	2	2	144	4342	0.00109988	0.00938166
NOS1	NOS1AP	3	8	246	13144	0.000342116	0.00426411
NOS1	PRKCA	3	8	246	13144	0.000342116	0.00426411
NOS1	PRKACA	3	8	246	13144	0.000342116	0.00426411
NOS1	DYNLL1	3	8	246	13144	0.000342116	0.00426411
NOS1	VAC14	3	8	246	13144	0.000342116	0.00426411
NOS1	CAMK1	3	8	246	13144	0.000342116	0.00426411
NOS1	PRKD1	3	8	246	13144	0.000342116	0.00426411
NOS1	CAMK4	3	8	246	13144	0.000342116	0.00426411
NOS1	DNCL1	3	8	246	13144	0.000342116	0.00426411
NOS1	STUB1	3	8	246	13144	0.000342116	0.00426411
NOS1	CAMK2A	3	8	246	13144	0.000342116	0.00426411
PML	ADH1B	2	3	46	12657	3.95e-05	0.000760115
PPP2R1A	ATP1A1	3	6	182	5338	0.000733531	0.00694815
PPP2R1A	CYC1	3	6	182	5338	0.000733531	0.00694815
PPP2R1A	ACADM	3	6	182	5338	0.000733531	0.00694815
PPP2R1A	PC	3	6	182	5338	0.000733531	0.00694815
PPP2R1A	PPP2R1B	3	6	182	5338	0.000733531	0.00694815
PPP2R1A	GFPT1	3	6	182	5338	0.000733531	0.00694815
PPP2R1A	AIMP2	3	6	182	5338	0.000733531	0.00694815
PPP2R1A	PPP2R5D	3	6	182	5338	0.000733531	0.00694815
PPP2R1A	TAB1	3	6	182	5338	0.000733531	0.00694815
PPP2R1A	IPO9	3	6	182	5338	0.000733531	0.00694815
PPP2R1A	EHD1	3	6	182	5338	0.000733531	0.00694815
PPP2R1A	TNPO3	3	6	182	5338	0.000733531	0.00694815
FGF9	FGF9	2	2	52	4539	0.000131246	0.00206582
SLC8A1	PPP3CB	3	18	125	21944	0.000141461	0.00221361
SLC8A1	IQCJ-SCHIP1	3	18	125	21944	0.000141461	0.00221361
STX2	UNC13B	2	2	126	3723	0.00114539	0.00972089
MCM5	COPE	2	3	130	7338	0.000930449	0.00829741
MCM5	PRMT5	2	3	131	7338	0.000944732	0.00837831
MCM5	PSMA3	2	3	143	7338	0.0011245	0.00957133
MCM5	HSF2	2	3	86	7338	0.000408843	0.00483351
MCM5	CACYBP	2	3	142	7338	0.00110893	0.00945131
CTNNB1	HLA-A	2	5	10	6606	2.28e-05	0.000621006
CTNNB1	BTRC	2	5	9	6606	1.85e-05	0.000527237
OPRM1	SIAH2	3	7	120	8074	0.000109874	0.00178175
OPRM1	PPL	3	7	194	8074	0.000451518	0.00504249
OPRM1	PENK	3	7	108	8074	8.05e-05	0.00137991
OPRM1	FLNA	3	7	194	8074	0.000451518	0.00504249
OPRM1	GJA4	3	7	120	8074	0.000109874	0.00178175
OPRM1	ZYX	3	7	107	8074	7.83e-05	0.00134818
OPRM1	GPRASP1	3	7	194	8074	0.000451518	0.00504249
OPRM1	WLS	3	7	103	8074	6.99e-05	0.00123683
OPRM1	SIAH1	3	7	115	8074	9.69e-05	0.00158794
OPRM1	DOK4	3	7	92	8074	5e-05	0.00092151
OPRM1	COPS5	3	7	116	8074	9.94e-05	0.00162415
OPRM1	RANBP9	3	7	194	8074	0.000451518	0.00504249
OPRM1	KCNF1	3	7	95	8074	5.5e-05	0.00100543
OPRM1	VAPA	3	7	116	8074	9.94e-05	0.00162415
OPRM1	DOK5	3	7	102	8074	6.79e-05	0.00120425
OPRM1	DNAJB4	3	7	132	8074	0.000145586	0.00226821
OPRM1	AUP1	3	7	109	8074	8.27e-05	0.00138421
SNCA	TOR1A	2	2	90	4011	0.000503477	0.00540939
SNCA	SIAH2	2	2	93	4011	0.000537602	0.00569798
SNCA	EIF3G	2	2	92	4011	0.000526102	0.00560566
SNCA	MT-CO3	2	2	99	4011	0.000609207	0.00617017
SNCA	ABL1	2	2	90	4011	0.000503477	0.00540939
SNCA	EGFR	2	2	101	4011	0.00063407	0.00620128
SNCA	A1BG	2	2	99	4011	0.000609207	0.00617017
SNCA	GAPDH	2	2	97	4011	0.000584841	0.00604136
SNCA	FYN	2	2	91	4011	0.000514728	0.00550818
SNCA	PSAP	2	2	93	4011	0.000537602	0.00569798
SNCA	VIM	2	2	90	4011	0.000503477	0.00540939
SNCA	UBC	2	2	99	4011	0.000609207	0.00617017
SNCA	HSPA1A	2	2	96	4011	0.000572845	0.00595366
SNCA	MAPT	2	2	93	4011	0.000537602	0.00569798
SNCA	CDK4	2	2	96	4011	0.000572845	0.00595366
SNCA	SRC	2	2	91	4011	0.000514728	0.00550818
SNCA	LAMP2	2	2	90	4011	0.000503477	0.00540939
SNCA	TGM1	2	2	94	4011	0.000549225	0.00579909
SNCA	GRK2	2	2	90	4011	0.000503477	0.00540939
SNCA	GRK5	2	2	92	4011	0.000526102	0.00560566
SNCA	SNCA	2	2	101	4011	0.00063407	0.00620128
SNCA	USP8	2	2	99	4011	0.000609207	0.00617017
SNCA	HTT	2	2	99	4011	0.000609207	0.00617017
SNCA	GRK6	2	2	96	4011	0.000572845	0.00595366
SNCA	SYK	2	2	93	4011	0.000537602	0.00569798
SNCA	NEDD4	2	2	99	4011	0.000609207	0.00617017
SNCA	CSNK1A1	2	2	92	4011	0.000526102	0.00560566
SNCA	CSNK1D	2	2	91	4011	0.000514728	0.00550818
SNCA	APLP1	2	2	93	4011	0.000537602	0.00569798
SNCA	PLK1	2	2	92	4011	0.000526102	0.00560566
SNCA	EEF1A1	2	2	102	4011	0.000646688	0.00628834
SNCA	CSNK2A1	2	2	93	4011	0.000537602	0.00569798
SNCA	SLC6A3	2	2	90	4011	0.000503477	0.00540939
SNCA	YWHAH	2	2	92	4011	0.000526102	0.00560566
SNCA	PIN1	2	2	95	4011	0.000560973	0.0058599
SNCA	DYRK1A	2	2	93	4011	0.000537602	0.00569798
SNCA	PTK2B	2	2	99	4011	0.000609207	0.00617017
SNCA	GRK1	2	2	92	4011	0.000526102	0.00560566
SNCA	PDE4DIP	2	2	99	4011	0.000609207	0.00617017
SNCA	COX3	2	2	99	4011	0.000609207	0.00617017
SNCA	KLK6	2	2	95	4011	0.000560973	0.0058599
SNCA	USP7	2	2	99	4011	0.000609207	0.00617017
SNCA	DOCK7	2	2	99	4011	0.000609207	0.00617017
SNCA	NEDD4L	2	2	91	4011	0.000514728	0.00550818
SNCA	SDF4	2	2	90	4011	0.000503477	0.00540939
SNCA	PLK3	2	2	94	4011	0.000549225	0.00579909
SNCA	PLK2	2	2	91	4011	0.000514728	0.00550818
SNCA	CHMP5	2	2	90	4011	0.000503477	0.00540939
SNCA	RABAC1	2	2	99	4011	0.000609207	0.00617017
SNCA	STUB1	2	2	90	4011	0.000503477	0.00540939
SNCA	SNCAIP	2	2	99	4011	0.000609207	0.00617017
SNCA	HEL-S-162eP	2	2	97	4011	0.000584841	0.00604136
SNCA	HEL-S-101	2	2	93	4011	0.000537602	0.00569798
SNCA	HEL-S-163pA	2	2	99	4011	0.000609207	0.00617017
SNCA	HEL-S-130P	2	2	94	4011	0.000549225	0.00579909
RBMX	HNRNPK	2	2	40	5882	4.62e-05	0.000857129
ADH7	ADH7	2	2	73	3108	0.000551676	0.00581456
PBX1	MYH10	2	5	74	21771	0.00011475	0.00183857
PBX1	NEDD4L	2	5	74	21771	0.00011475	0.00183857
ETV6	GRB2	2	4	95	7075	0.00106253	0.00915532
ETV6	SUMO1	2	4	94	7075	0.00104047	0.00898214
ETV6	FLI1	2	4	94	7075	0.00104047	0.00898214
ETV6	KAT5	2	4	88	7075	0.000912925	0.0081797
ETV6	NTAQ1	2	4	94	7075	0.00104047	0.00898214
PRKCI	PDPK1	2	2	154	5841	0.000695132	0.00668461
PRKCI	GAPDH	2	2	154	5841	0.000695132	0.00668461
PRKCI	HSP90AB1	2	2	148	5841	0.000642021	0.00624949
PRKCI	PRKCZ	2	2	154	5841	0.000695132	0.00668461
PRKCI	CASP8	2	2	148	5841	0.000642021	0.00624949
PRKCI	IL1RAP	2	2	148	5841	0.000642021	0.00624949
GRIA3	SDCBP	7	12	395	6883	1.26e-06	4.62e-05
GRIA3	ADRB2	7	12	395	6883	1.26e-06	4.62e-05
GRIA3	NSF	7	12	283	6883	1.31e-07	7.74e-06
GRIA3	GRIP2	7	12	283	6883	1.31e-07	7.74e-06
GRIA3	PICK1	7	12	283	6883	1.31e-07	7.74e-06
GRIA3	GRIP1	7	12	283	6883	1.31e-07	7.74e-06
AKR1C3	MAGEA11	3	4	105	4532	4.89e-05	0.000902864
AKR1C3	LRIF1	3	4	89	4532	2.98e-05	0.000621006
AKR1C3	RIF1	3	4	89	4532	2.98e-05	0.000621006
AKR1C3	ACIN1	3	4	89	4532	2.98e-05	0.000621006
AKR1C3	ZHX1	3	4	89	4532	2.98e-05	0.000621006
PIK3CA	FBP2	6	8	243	9411	7.93e-09	8.71e-07
PIK3CA	ADAP1	6	8	243	9411	7.93e-09	8.71e-07
PIK3CA	TNFSF13	3	8	94	9411	5.37e-05	0.000985368
PIK3CA	NRAS	6	8	240	9411	7.37e-09	8.4e-07
PIK3CA	HRAS	6	8	240	9411	7.37e-09	8.4e-07
PIK3CA	KRAS	6	8	243	9411	7.93e-09	8.71e-07
PIK3CA	FTL	6	8	240	9411	7.37e-09	8.4e-07
PIK3CA	UMPS	6	8	243	9411	7.93e-09	8.71e-07
PIK3CA	DDX5	6	8	240	9411	7.37e-09	8.4e-07
PIK3CA	TMOD1	6	8	246	9411	8.54e-09	9.21e-07
PIK3CA	STAT1	6	8	243	9411	7.93e-09	8.71e-07
PIK3CA	RPS20	6	8	240	9411	7.37e-09	8.4e-07
PIK3CA	MAP2K1	6	8	243	9411	7.93e-09	8.71e-07
PIK3CA	IL13RA2	6	8	243	9411	7.93e-09	8.71e-07
PIK3CA	VARS2	6	8	240	9411	7.37e-09	8.4e-07
PIK3CA	GALNT12	6	8	246	9411	8.54e-09	9.21e-07
PIK3CA	THRSP	6	8	243	9411	7.93e-09	8.71e-07
PIK3CA	UFD1	6	8	240	9411	7.37e-09	8.4e-07
PIK3CA	BEX1	6	8	243	9411	7.93e-09	8.71e-07
PIK3CA	APPL1	6	8	243	9411	7.93e-09	8.71e-07
CDKN2A	ORC5L	2	6	29	4400	0.000640233	0.00623878
CDKN2A	CDC7	3	6	36	4400	1.08e-05	0.000325929
CDKN2A	SIVA1	2	6	29	4400	0.000640233	0.00623878
CDKN2A	ORC5	2	6	29	4400	0.000640233	0.00623878
CDKN2A	ORC4	3	6	39	4400	1.37e-05	0.000397636
CDKN2A	CDC14B	3	6	41	4400	1.58e-05	0.000454934
CDKN2A	CTSV	3	6	38	4400	1.26e-05	0.000370364
CDKN2A	DEAF1	2	6	30	4400	0.000684733	0.0065925
CDKN2A	FRAT2	2	6	28	4400	0.000597204	0.00610164
CDKN2A	GMNN	2	6	30	4400	0.000684733	0.0065925
CDKN2A	PIAS2	2	6	29	4400	0.000640233	0.00623878
CDKN2A	SLC4A1	2	6	31	4400	0.000730698	0.00694815
CDKN2A	FN1	2	6	28	4400	0.000597204	0.00610164
CDKN2A	ALDOB	2	6	33	4400	0.000827017	0.00760539
CDKN2A	HSP90AB1	3	6	32	4400	7.57e-06	0.000236745
CDKN2A	UBC	2	6	28	4400	0.000597204	0.00610164
CDKN2A	NAT2	2	6	31	4400	0.000730698	0.00694815
CDKN2A	RASA1	2	6	29	4400	0.000640233	0.00623878
CDKN2A	CCND1	3	6	35	4400	9.89e-06	0.000304842
CDKN2A	YY1	2	6	27	4400	0.000555645	0.00585257
CDKN2A	PML	2	6	28	4400	0.000597204	0.00610164
CDKN2A	MCM5	4	6	30	4400	3.21e-08	2.09e-06
CDKN2A	PPP1CC	2	6	32	4400	0.000778127	0.00726757
CDKN2A	VHL	2	6	36	4400	0.000982425	0.00864109
CDKN2A	PEX19	2	6	30	4400	0.000684733	0.0065925
CDKN2A	CDKN2A	2	6	16	4400	0.000196432	0.00291358
CDKN2A	MAPK8	2	6	35	4400	0.000929168	0.00828828
CDKN2A	UBE2A	2	6	29	4400	0.000640233	0.00623878
CDKN2A	MCM2	2	6	28	4400	0.000597204	0.00610164
CDKN2A	SMARCA4	2	6	28	4400	0.000597204	0.00610164
CDKN2A	MAPK10	3	6	40	4400	1.47e-05	0.000427632
CDKN2A	CTBP2	3	6	32	4400	7.57e-06	0.000236745
CDKN2A	SEC61B	2	6	30	4400	0.000684733	0.0065925
CDKN2A	SUMO2	2	6	35	4400	0.000929168	0.00828828
CDKN2A	PPP1CB	2	6	30	4400	0.000684733	0.0065925
CDKN2A	ACTG1	2	6	32	4400	0.000778127	0.00726757
CDKN2A	RPP38	2	6	28	4400	0.000597204	0.00610164
CDKN2A	CDK6	2	6	28	4400	0.000597204	0.00610164
CDKN2A	HNRNPU	2	6	28	4400	0.000597204	0.00610164
CDKN2A	MDM2	2	6	31	4400	0.000730698	0.00694815
CDKN2A	E2F1	2	6	29	4400	0.000640233	0.00623878
CDKN2A	MAP2K1	2	6	34	4400	0.000877365	0.00796989
CDKN2A	C1QBP	2	6	32	4400	0.000778127	0.00726757
CDKN2A	AHNAK	2	6	28	4400	0.000597204	0.00610164
CDKN2A	NMI	2	6	28	4400	0.000597204	0.00610164
CDKN2A	BAAT	3	6	35	4400	9.89e-06	0.000304842
CDKN2A	CYLC2	2	6	28	4400	0.000597204	0.00610164
CDKN2A	MAPKAPK3	3	6	42	4400	1.7e-05	0.000486616
CDKN2A	E4F1	2	6	28	4400	0.000597204	0.00610164
CDKN2A	SFRP4	2	6	29	4400	0.000640233	0.00623878
CDKN2A	CRELD2	2	6	29	4400	0.000640233	0.00623878
CDKN2A	ZNF410	2	6	29	4400	0.000640233	0.00623878
CDKN2A	GALNT12	2	6	32	4400	0.000778127	0.00726757
CDKN2A	TMEFF1	2	6	28	4400	0.000597204	0.00610164
CDKN2A	COMMD1	2	6	38	4400	0.00109329	0.00933035
CDKN2A	TDRD7	2	6	28	4400	0.000597204	0.00610164
CDKN2A	ZNF420	2	6	28	4400	0.000597204	0.00610164
CDKN2A	HAUS1	2	6	28	4400	0.000597204	0.00610164
CDKN2A	CDK5RAP3	2	6	31	4400	0.000730698	0.00694815
CDKN2A	PPP1R9B	2	6	31	4400	0.000730698	0.00694815
CDKN2A	CDC5L	2	6	28	4400	0.000597204	0.00610164
CDKN2A	ANGPTL4	3	6	39	4400	1.37e-05	0.000397636
CDKN2A	NSD3	2	6	28	4400	0.000597204	0.00610164
CDKN2A	GGA3	2	6	30	4400	0.000684733	0.0065925
CDKN2A	CCDC180	2	6	28	4400	0.000597204	0.00610164
CDKN2A	DAXX	2	6	28	4400	0.000597204	0.00610164
CDKN2A	GGA1	2	6	28	4400	0.000597204	0.00610164
CDKN2A	HEL-S-49	3	6	39	4400	1.37e-05	0.000397636
DCC	AR	3	13	67	8649	0.000125439	0.00199
MAGEB1	SRPK2	3	5	80	1969	0.000630495	0.00619932
MAGEB1	NEDD4L	3	5	80	1969	0.000630495	0.00619932
MAGEB1	SRPK1	3	5	80	1969	0.000630495	0.00619932
ZAP70	KIT	2	5	45	5111	0.000761638	0.0071635
ATRX	H3-3A	2	11	44	12224	0.000697368	0.00670411
NEDD4	SPACIA1	4	7	268	9097	2.45e-05	0.000621006
NEDD4	SGK1	4	7	268	9097	2.45e-05	0.000621006
NEDD4	STK25	4	7	268	9097	2.45e-05	0.000621006
NEDD4	SCAMP3	4	7	289	9097	3.3e-05	0.000652305
NEDD4	HGS	4	7	289	9097	3.3e-05	0.000652305
NEDD4	CLIC2	4	7	268	9097	2.45e-05	0.000621006
NEDD4	SIVA1	4	7	268	9097	2.45e-05	0.000621006
NEDD4	TP73	4	7	289	9097	3.3e-05	0.000652305
NEDD4	TOM1	4	7	268	9097	2.45e-05	0.000621006
NEDD4	AP1G2	4	7	289	9097	3.3e-05	0.000652305
NEDD4	ANXA9	4	7	268	9097	2.45e-05	0.000621006
NEDD4	CD2BP2	4	7	268	9097	2.45e-05	0.000621006
NEDD4	LATS1	4	7	289	9097	3.3e-05	0.000652305
NEDD4	EGFR	4	7	268	9097	2.45e-05	0.000621006
NEDD4	RAF1	4	7	268	9097	2.45e-05	0.000621006
NEDD4	GBA	4	7	268	9097	2.45e-05	0.000621006
NEDD4	NTRK1	4	7	268	9097	2.45e-05	0.000621006
NEDD4	JUN	4	7	289	9097	3.3e-05	0.000652305
NEDD4	FYN	4	7	268	9097	2.45e-05	0.000621006
NEDD4	FES	4	7	268	9097	2.45e-05	0.000621006
NEDD4	YES1	4	7	268	9097	2.45e-05	0.000621006
NEDD4	IGF1R	4	7	268	9097	2.45e-05	0.000621006
NEDD4	ABCB1	4	7	289	9097	3.3e-05	0.000652305
NEDD4	PDGFRB	4	7	268	9097	2.45e-05	0.000621006
NEDD4	UBB	4	7	289	9097	3.3e-05	0.000652305
NEDD4	UBC	4	7	268	9097	2.45e-05	0.000621006
NEDD4	MAP2	4	7	268	9097	2.45e-05	0.000621006
NEDD4	FGFR1	4	7	268	9097	2.45e-05	0.000621006
NEDD4	IMPDH2	4	7	289	9097	3.3e-05	0.000652305
NEDD4	SRC	4	7	289	9097	3.3e-05	0.000652305
NEDD4	FLT1	4	7	268	9097	2.45e-05	0.000621006
NEDD4	SYT1	4	7	268	9097	2.45e-05	0.000621006
NEDD4	FGFR2	4	7	268	9097	2.45e-05	0.000621006
NEDD4	ERBB3	4	7	289	9097	3.3e-05	0.000652305
NEDD4	RPS6KB1	4	7	268	9097	2.45e-05	0.000621006
NEDD4	PAX7	4	7	289	9097	3.3e-05	0.000652305
NEDD4	POLR2A	4	7	289	9097	3.3e-05	0.000652305
NEDD4	YY1	4	7	268	9097	2.45e-05	0.000621006
NEDD4	AKT1	4	7	268	9097	2.45e-05	0.000621006
NEDD4	IRS1	4	7	268	9097	2.45e-05	0.000621006
NEDD4	FLT4	4	7	268	9097	2.45e-05	0.000621006
NEDD4	BMPR1A	4	7	268	9097	2.45e-05	0.000621006
NEDD4	PPARG	4	7	289	9097	3.3e-05	0.000652305
NEDD4	SNCA	4	7	268	9097	2.45e-05	0.000621006
NEDD4	EPS15	4	7	268	9097	2.45e-05	0.000621006
NEDD4	ABL2	4	7	268	9097	2.45e-05	0.000621006
NEDD4	SYK	4	7	268	9097	2.45e-05	0.000621006
NEDD4	NEDD4	3	7	16	9097	1.89e-07	1.02e-05
NEDD4	MRPL19	4	7	268	9097	2.45e-05	0.000621006
NEDD4	CLK3	4	7	268	9097	2.45e-05	0.000621006
NEDD4	SCNN1B	4	7	268	9097	2.45e-05	0.000621006
NEDD4	RPS6KA3	4	7	268	9097	2.45e-05	0.000621006
NEDD4	PLK1	4	7	268	9097	2.45e-05	0.000621006
NEDD4	EPHA5	4	7	268	9097	2.45e-05	0.000621006
NEDD4	PSMD4	4	7	268	9097	2.45e-05	0.000621006
NEDD4	PTEN	4	7	268	9097	2.45e-05	0.000621006
NEDD4	FGF12	4	7	268	9097	2.45e-05	0.000621006
NEDD4	UBE2L3	4	7	268	9097	2.45e-05	0.000621006
NEDD4	CDK5	4	7	268	9097	2.45e-05	0.000621006
NEDD4	MDM2	4	7	289	9097	3.3e-05	0.000652305
NEDD4	AMPD2	4	7	268	9097	2.45e-05	0.000621006
NEDD4	SLC6A3	4	7	289	9097	3.3e-05	0.000652305
NEDD4	RPL18A	4	7	268	9097	2.45e-05	0.000621006
NEDD4	TNK2	4	7	289	9097	3.3e-05	0.000652305
NEDD4	STK4	4	7	268	9097	2.45e-05	0.000621006
NEDD4	PRKG2	4	7	268	9097	2.45e-05	0.000621006
NEDD4	KCNAB2	4	7	268	9097	2.45e-05	0.000621006
NEDD4	GRB10	4	7	268	9097	2.45e-05	0.000621006
NEDD4	LAPTM5	4	7	268	9097	2.45e-05	0.000621006
NEDD4	GFUS	4	7	268	9097	2.45e-05	0.000621006
NEDD4	UBAP2L	4	7	289	9097	3.3e-05	0.000652305
NEDD4	BECN1	4	7	289	9097	3.3e-05	0.000652305
NEDD4	SCN5A	4	7	289	9097	3.3e-05	0.000652305
NEDD4	DAZAP2	4	7	289	9097	3.3e-05	0.000652305
NEDD4	ERBB4	4	7	289	9097	3.3e-05	0.000652305
NEDD4	PKN2	4	7	268	9097	2.45e-05	0.000621006
NEDD4	CAMK4	4	7	268	9097	2.45e-05	0.000621006
NEDD4	NFE2	4	7	289	9097	3.3e-05	0.000652305
NEDD4	CPSF6	4	7	289	9097	3.3e-05	0.000652305
NEDD4	MAPKAPK3	4	7	268	9097	2.45e-05	0.000621006
NEDD4	SPANXN3	4	7	268	9097	2.45e-05	0.000621006
NEDD4	DKFZp781O1323	4	7	268	9097	2.45e-05	0.000621006
NEDD4	ANKRD13D	4	7	268	9097	2.45e-05	0.000621006
NEDD4	MARK2	4	7	268	9097	2.45e-05	0.000621006
NEDD4	CAMK1D	4	7	268	9097	2.45e-05	0.000621006
NEDD4	ARRDC1	4	7	289	9097	3.3e-05	0.000652305
NEDD4	TCEANC	4	7	268	9097	2.45e-05	0.000621006
NEDD4	GRK7	4	7	268	9097	2.45e-05	0.000621006
NEDD4	RTF1	4	7	268	9097	2.45e-05	0.000621006
NEDD4	WBP2	4	7	268	9097	2.45e-05	0.000621006
NEDD4	PMEPA1	4	7	268	9097	2.45e-05	0.000621006
NEDD4	SH3KBP1	4	7	289	9097	3.3e-05	0.000652305
NEDD4	SAAL1	4	7	268	9097	2.45e-05	0.000621006
NEDD4	THOC1	4	7	289	9097	3.3e-05	0.000652305
NEDD4	DCUN1D1	4	7	289	9097	3.3e-05	0.000652305
NEDD4	MARK4	4	7	268	9097	2.45e-05	0.000621006
NEDD4	CAMKK2	4	7	268	9097	2.45e-05	0.000621006
NEDD4	MAP3K5	4	7	268	9097	2.45e-05	0.000621006
NEDD4	SMAD5	4	7	268	9097	2.45e-05	0.000621006
NEDD4	LITAF	4	7	268	9097	2.45e-05	0.000621006
NEDD4	MAP3K3	4	7	268	9097	2.45e-05	0.000621006
NEDD4	SMO	4	7	289	9097	3.3e-05	0.000652305
NEDD4	PYM1	4	7	268	9097	2.45e-05	0.000621006
NEDD4	KIFC3	4	7	268	9097	2.45e-05	0.000621006
NEDD4	RBCK1	4	7	268	9097	2.45e-05	0.000621006
NEDD4	ASPSCR1	4	7	268	9097	2.45e-05	0.000621006
NEDD4	NSRP1	4	7	268	9097	2.45e-05	0.000621006
NEDD4	SRMS	4	7	268	9097	2.45e-05	0.000621006
NEDD4	RPAP3	4	7	268	9097	2.45e-05	0.000621006
NEDD4	SP140L	4	7	268	9097	2.45e-05	0.000621006
NEDD4	SMURF2	4	7	289	9097	3.3e-05	0.000652305
NEDD4	SGK2	4	7	268	9097	2.45e-05	0.000621006
NEDD4	DYRK4	4	7	268	9097	2.45e-05	0.000621006
NEDD4	SAMSN1	4	7	268	9097	2.45e-05	0.000621006
NEDD4	CUEDC1	4	7	268	9097	2.45e-05	0.000621006
NEDD4	NHP2	4	7	268	9097	2.45e-05	0.000621006
NEDD4	PLK2	4	7	268	9097	2.45e-05	0.000621006
NEDD4	RNF7	4	7	268	9097	2.45e-05	0.000621006
NEDD4	TBK1	4	7	268	9097	2.45e-05	0.000621006
NEDD4	SEPTIN9	4	7	268	9097	2.45e-05	0.000621006
NEDD4	BAIAP2	4	7	268	9097	2.45e-05	0.000621006
NEDD4	AURKC	4	7	268	9097	2.45e-05	0.000621006
NEDD4	AKT3	4	7	268	9097	2.45e-05	0.000621006
NEDD4	MAP3K2	4	7	268	9097	2.45e-05	0.000621006
NEDD4	LUC7L2	4	7	268	9097	2.45e-05	0.000621006
NEDD4	RNF11	4	7	268	9097	2.45e-05	0.000621006
NEDD4	IRS2	4	7	289	9097	3.3e-05	0.000652305
NEDD4	MAP4K5	4	7	268	9097	2.45e-05	0.000621006
NEDD4	STK24	4	7	268	9097	2.45e-05	0.000621006
RAP1GAP	DNCI1	2	3	85	5650	0.000672178	0.00650082
RAP1GAP	DYNC1I1	2	3	85	5650	0.000672178	0.00650082
RAP1GAP	BRAF	2	3	85	5650	0.000672178	0.00650082
RAP1GAP	PFN2	3	3	168	5650	2.63e-05	0.000621006
RAP1GAP	PLK1	2	3	85	5650	0.000672178	0.00650082
RAP1GAP	AFDN	2	3	85	5650	0.000672178	0.00650082
RAP1GAP	RAP1A	3	3	73	5650	2.16e-06	7.4e-05
RAP1GAP	MAPK6	2	3	85	5650	0.000672178	0.00650082
RAP1GAP	DKFZp762B153	2	3	57	5650	0.00030328	0.0040101
RAP1GAP	MAP1LC3B	3	3	84	5650	3.29e-06	0.000111236
SCTR	SNTA1	2	2	69	2900	0.000566112	0.00589332
KCNJ6	GABBR1	4	5	181	19671	3.56e-08	2.27e-06
IFNAR2	IFNAR2	2	4	52	4614	0.000750681	0.00710198
NRIP1	THRB	2	2	36	7940	2.06e-05	0.000579875
PIK3CG	HRAS	4	6	271	5930	6.07e-05	0.00109228
PIK3CG	PRKCB	4	6	326	5930	0.000125232	0.0019877
PIK3CG	GRK2	4	6	271	5930	6.07e-05	0.00109228
PIK3CG	PIK3CG	4	6	275	5930	6.43e-05	0.00114602
PIK3CG	SET	4	6	275	5930	6.43e-05	0.00114602
CDC34	RAD21	2	2	68	2172	0.000980163	0.00862591
CDC34	UBC	2	2	71	2172	0.00106855	0.00919741
CDC34	WARS1	2	2	66	2172	0.000923354	0.00825474
CDC34	PPP1CC	2	2	70	2172	0.00103867	0.00897378
CDC34	USP5	2	2	69	2172	0.0010092	0.0087996
CDC34	CDKN1B	2	2	63	2172	0.00084132	0.00771878
CDC34	GNPDA1	2	2	69	2172	0.0010092	0.0087996
CDC34	RAD23A	2	2	74	2172	0.00116076	0.00983834
CDC34	PPP1CB	2	2	64	2172	0.000868241	0.00790712
CDC34	RBX1	2	2	73	2172	0.0011296	0.00960208
CDC34	UBA52	2	2	66	2172	0.000923354	0.00825474
CDC34	SKP2	2	2	73	2172	0.0011296	0.00960208
CDC34	HIF1A	2	2	71	2172	0.00106855	0.00919741
CDC34	SIAH1	2	2	73	2172	0.0011296	0.00960208
CDC34	ZNRF1	2	2	62	2172	0.000814824	0.00750352
CDC34	TMEM14C	2	2	69	2172	0.0010092	0.0087996
CDC34	EIF3K	2	2	69	2172	0.0010092	0.0087996
CDC34	FBXW2	2	2	60	2172	0.000763102	0.00717098
CDC34	BTRC	2	2	70	2172	0.00103867	0.00897378
CDC34	TIMM13	2	2	74	2172	0.00116076	0.00983834
UBE2A	UBE2A	2	3	16	3251	7.24e-05	0.00127618
CSNK1E	DHX16	2	2	137	6699	0.000418236	0.00492104
CSNK1E	PPM1B	2	2	134	6699	0.000400119	0.00474084
CSNK1E	HSP90AB1	2	2	136	6699	0.000412152	0.00486549
CSNK1E	BYSL	2	2	68	6699	0.000103038	0.00167852
CSNK1E	PPP2R5D	2	2	95	6699	0.000201107	0.00297744
CSNK1E	CRY1	2	2	136	6699	0.000412152	0.00486549
CSNK1E	DTD1	2	2	86	6699	0.000164807	0.00252488
CSNK1E	NOB1	2	2	67	6699	0.00010003	0.00163282
CSNK1E	RAD54B	2	2	136	6699	0.000412152	0.00486549
[truncated: 1,731 more rows]
